# Supplementary material for: Bioinformatic Analysis and Post-Translational Modification Crosstalk Prediction of Lysine Acetylation
Source: PubMed Central journal article supplement (PMC3229533; doi:10.1371/journal.pone.0028228), 2011-12-02
Supplement: pone.0028228.s004.pdf [file pone.0028228.s004.pdf]

Table S1

| IPI         | Acetylation | Position |
|-------------|-------------|----------|
| IPI00000001 | K           | 270      |
| IPI00000057 | K           | 3        |
| IPI00000104 | K           | 395      |
| IPI00000104 | K           | 397      |
| IPI00000155 | K           | 25       |
| IPI00000155 | K           | 72       |
| IPI00000155 | K           | 77       |
| IPI00000279 | K           | 27       |
| IPI00000352 | K           | 57       |
| IPI00000398 | K           | 411      |
| IPI00000425 | K           | 279      |
| IPI00000494 | K           | 5        |
| IPI00000494 | K           | 48       |
| IPI00000494 | K           | 221      |
| IPI00000606 | K           | 227      |
| IPI00000643 | K           | 111      |
| IPI00000684 | K           | 180      |
| IPI00000690 | K           | 295      |
| IPI00000690 | K           | 593      |
| IPI00000712 | K           | 438      |
| IPI00000712 | K           | 443      |
| IPI00000712 | K           | 445      |
| IPI00000712 | K           | 462      |
| IPI00000712 | K           | 472      |
| IPI00000712 | K           | 487      |
| IPI00000712 | K           | 506      |
| IPI00000712 | K           | 508      |
| IPI00000712 | K           | 516      |
| IPI00000712 | K           | 518      |
| IPI00000712 | K           | 533      |
| IPI00000712 | K           | 536      |
| IPI00000712 | K           | 538      |
| IPI00000712 | K           | 541      |
| IPI00000712 | K           | 543      |
| IPI00000712 | K           | 548      |
| IPI00000712 | K           | 554      |
| IPI00000712 | K           | 555      |
| IPI00000784 | K           | 4        |
| IPI00000784 | K           | 116      |
| IPI00000787 | K           | 53       |
| IPI00000787 | K           | 109      |
| IPI00000792 | K           | 23       |
| IPI00000792 | K           | 208      |
| IPI00000816 | K           | 50       |
| IPI00000816 | K           | 69       |
| IPI00000816 | K           | 118      |
| IPI00000816 | K           | 123      |
| IPI00000873 | K           | 420      |
| IPI00000873 | K           | 423      |
| IPI00000873 | K           | 645      |
| IPI00000874 | K           | 7        |

Table S1

|             |   |      |
|-------------|---|------|
| IPI00000874 | K | 16   |
| IPI00000874 | K | 27   |
| IPI00000874 | K | 35   |
| IPI00000874 | K | 37   |
| IPI00000874 | K | 168  |
| IPI00000874 | K | 197  |
| IPI00000874 | K | 199  |
| IPI00000948 | K | 314  |
| IPI00000948 | K | 315  |
| IPI00001091 | K | 306  |
| IPI00001091 | K | 308  |
| IPI00001091 | K | 543  |
| IPI00001146 | K | 59   |
| IPI00001364 | K | 278  |
| IPI00001364 | K | 280  |
| IPI00001432 | K | 299  |
| IPI00001453 | K | 290  |
| IPI00001458 | K | 1316 |
| IPI00001458 | K | 1318 |
| IPI00001539 | K | 25   |
| IPI00001539 | K | 81   |
| IPI00001539 | K | 137  |
| IPI00001539 | K | 181  |
| IPI00001539 | K | 270  |
| IPI00001600 | K | 203  |
| IPI00001600 | K | 209  |
| IPI00001639 | K | 211  |
| IPI00001639 | K | 835  |
| IPI00001639 | K | 867  |
| IPI00001639 | K | 871  |
| IPI00001699 | K | 21   |
| IPI00001699 | K | 22   |
| IPI00001712 | K | 860  |
| IPI00001735 | K | 878  |
| IPI00001735 | K | 959  |
| IPI00001735 | K | 1218 |
| IPI00001735 | K | 1248 |
| IPI00001735 | K | 1795 |
| IPI00001735 | K | 1970 |
| IPI00001735 | K | 2037 |
| IPI00001883 | K | 288  |
| IPI00001952 | K | 407  |
| IPI00001960 | K | 130  |
| IPI00001985 | K | 362  |
| IPI00002144 | K | 321  |
| IPI00002188 | K | 1708 |
| IPI00002214 | K | 22   |
| IPI00002255 | K | 2116 |
| IPI00002255 | K | 2117 |
| IPI00002270 | K | 40   |
| IPI00002270 | K | 73   |
| IPI00002324 | K | 46   |

Table S1

|             |   |      |
|-------------|---|------|
| IPI00002324 | K | 299  |
| IPI00002335 | K | 6    |
| IPI00002335 | K | 444  |
| IPI00002349 | K | 140  |
| IPI00002372 | K | 260  |
| IPI00002372 | K | 399  |
| IPI00002408 | K | 216  |
| IPI00002424 | K | 44   |
| IPI00002460 | K | 233  |
| IPI00002503 | K | 343  |
| IPI00002503 | K | 348  |
| IPI00002519 | K | 271  |
| IPI00002520 | K | 103  |
| IPI00002520 | K | 181  |
| IPI00002520 | K | 196  |
| IPI00002520 | K | 269  |
| IPI00002520 | K | 297  |
| IPI00002520 | K | 356  |
| IPI00002520 | K | 464  |
| IPI00002520 | K | 469  |
| IPI00002520 | K | 474  |
| IPI00002521 | K | 41   |
| IPI00002521 | K | 46   |
| IPI00002521 | K | 94   |
| IPI00002521 | K | 99   |
| IPI00002521 | K | 105  |
| IPI00002525 | K | 136  |
| IPI00002538 | K | 304  |
| IPI00002564 | K | 256  |
| IPI00002564 | K | 260  |
| IPI00002564 | K | 271  |
| IPI00002852 | K | 84   |
| IPI00002852 | K | 86   |
| IPI00002894 | K | 1007 |
| IPI00002922 | K | 254  |
| IPI00002938 | K | 88   |
| IPI00002966 | K | 272  |
| IPI00002966 | K | 430  |
| IPI00002966 | K | 603  |
| IPI00002966 | K | 679  |
| IPI00002993 | K | 5    |
| IPI00002993 | K | 108  |
| IPI00003031 | K | 198  |
| IPI00003168 | K | 188  |
| IPI00003168 | K | 194  |
| IPI00003168 | K | 251  |
| IPI00003362 | K | 97   |
| IPI00003362 | K | 114  |
| IPI00003362 | K | 269  |
| IPI00003362 | K | 377  |
| IPI00003362 | K | 548  |
| IPI00003362 | K | 586  |

Table S1

|             |   |     |
|-------------|---|-----|
| IPI00003362 | K | 652 |
| IPI00003377 | K | 24  |
| IPI00003377 | K | 185 |
| IPI00003419 | K | 174 |
| IPI00003419 | K | 179 |
| IPI00003420 | K | 271 |
| IPI00003438 | K | 146 |
| IPI00003442 | K | 389 |
| IPI00003442 | K | 532 |
| IPI00003443 | K | 86  |
| IPI00003443 | K | 208 |
| IPI00003443 | K | 214 |
| IPI00003482 | K | 110 |
| IPI00003482 | K | 230 |
| IPI00003494 | K | 48  |
| IPI00003495 | K | 601 |
| IPI00003527 | K | 32  |
| IPI00003527 | K | 34  |
| IPI00003588 | K | 12  |
| IPI00003588 | K | 138 |
| IPI00003588 | K | 166 |
| IPI00003766 | K | 66  |
| IPI00003766 | K | 172 |
| IPI00003768 | K | 98  |
| IPI00003814 | K | 82  |
| IPI00003815 | K | 105 |
| IPI00003815 | K | 127 |
| IPI00003815 | K | 141 |
| IPI00003815 | K | 178 |
| IPI00003817 | K | 21  |
| IPI00003817 | K | 25  |
| IPI00003817 | K | 30  |
| IPI00003817 | K | 33  |
| IPI00003817 | K | 40  |
| IPI00003817 | K | 47  |
| IPI00003817 | K | 95  |
| IPI00003817 | K | 102 |
| IPI00003817 | K | 124 |
| IPI00003817 | K | 175 |
| IPI00003833 | K | 158 |
| IPI00003865 | K | 71  |
| IPI00003865 | K | 88  |
| IPI00003865 | K | 108 |
| IPI00003865 | K | 112 |
| IPI00003865 | K | 246 |
| IPI00003865 | K | 319 |
| IPI00003865 | K | 348 |
| IPI00003865 | K | 512 |
| IPI00003865 | K | 524 |
| IPI00003865 | K | 526 |
| IPI00003865 | K | 531 |
| IPI00003865 | K | 589 |

Table S1

|             |   |      |
|-------------|---|------|
| IPI00003865 | K | 597  |
| IPI00003865 | K | 601  |
| IPI00003870 | K | 211  |
| IPI00003881 | K | 87   |
| IPI00003881 | K | 224  |
| IPI00003918 | K | 14   |
| IPI00003918 | K | 106  |
| IPI00003918 | K | 163  |
| IPI00003918 | K | 333  |
| IPI00003918 | K | 412  |
| IPI00003923 | K | 162  |
| IPI00003925 | K | 354  |
| IPI00003933 | K | 229  |
| IPI00003935 | K | 6    |
| IPI00003935 | K | 12   |
| IPI00003935 | K | 13   |
| IPI00003935 | K | 16   |
| IPI00003935 | K | 17   |
| IPI00003935 | K | 21   |
| IPI00003935 | K | 109  |
| IPI00003935 | K | 121  |
| IPI00003944 | K | 295  |
| IPI00003949 | K | 10   |
| IPI00003949 | K | 82   |
| IPI00003949 | K | 92   |
| IPI00003949 | K | 94   |
| IPI00003965 | K | 595  |
| IPI00003965 | K | 869  |
| IPI00003965 | K | 1084 |
| IPI00003965 | K | 1096 |
| IPI00003968 | K | 370  |
| IPI00003970 | K | 119  |
| IPI00004233 | K | 993  |
| IPI00004233 | K | 1165 |
| IPI00004233 | K | 1178 |
| IPI00004233 | K | 1185 |
| IPI00004233 | K | 1639 |
| IPI00004233 | K | 1938 |
| IPI00004233 | K | 2005 |
| IPI00004233 | K | 2264 |
| IPI00004233 | K | 2421 |
| IPI00004312 | K | 375  |
| IPI00004344 | K | 79   |
| IPI00004350 | K | 12   |
| IPI00004358 | K | 316  |
| IPI00004358 | K | 811  |
| IPI00004363 | K | 351  |
| IPI00004461 | K | 56   |
| IPI00004461 | K | 275  |
| IPI00004521 | K | 256  |
| IPI00004527 | K | 1054 |
| IPI00004527 | K | 1059 |

Table S1

|             |   |      |
|-------------|---|------|
| IPI00004566 | K | 296  |
| IPI00004655 | K | 199  |
| IPI00004845 | K | 45   |
| IPI00004845 | K | 48   |
| IPI00004845 | K | 166  |
| IPI00004859 | K | 755  |
| IPI00004859 | K | 863  |
| IPI00004859 | K | 1411 |
| IPI00004860 | K | 60   |
| IPI00004860 | K | 205  |
| IPI00004860 | K | 287  |
| IPI00004860 | K | 288  |
| IPI00004924 | K | 225  |
| IPI00004968 | K | 122  |
| IPI00004968 | K | 261  |
| IPI00005036 | K | 542  |
| IPI00005038 | K | 101  |
| IPI00005045 | K | 7    |
| IPI00005045 | K | 8    |
| IPI00005045 | K | 9    |
| IPI00005045 | K | 304  |
| IPI00005079 | K | 64   |
| IPI00005132 | K | 502  |
| IPI00005154 | K | 33   |
| IPI00005154 | K | 90   |
| IPI00005154 | K | 233  |
| IPI00005154 | K | 413  |
| IPI00005154 | K | 542  |
| IPI00005154 | K | 548  |
| IPI00005159 | K | 299  |
| IPI00005159 | K | 322  |
| IPI00005160 | K | 44   |
| IPI00005160 | K | 82   |
| IPI00005161 | K | 275  |
| IPI00005161 | K | 295  |
| IPI00005162 | K | 56   |
| IPI00005162 | K | 61   |
| IPI00005292 | K | 118  |
| IPI00005347 | K | 260  |
| IPI00005367 | K | 9    |
| IPI00005367 | K | 10   |
| IPI00005492 | K | 112  |
| IPI00005502 | K | 642  |
| IPI00005511 | K | 3    |
| IPI00005578 | K | 327  |
| IPI00005614 | K | 90   |
| IPI00005614 | K | 1815 |
| IPI00005614 | K | 1913 |
| IPI00005614 | K | 1989 |
| IPI00005614 | K | 2269 |
| IPI00005615 | K | 122  |
| IPI00005630 | K | 117  |

Table S1

|             |   |      |
|-------------|---|------|
| IPI00005630 | K | 120  |
| IPI00005630 | K | 125  |
| IPI00005648 | K | 293  |
| IPI00005648 | K | 424  |
| IPI00005648 | K | 429  |
| IPI00005648 | K | 616  |
| IPI00005648 | K | 618  |
| IPI00005648 | K | 829  |
| IPI00005657 | K | 21   |
| IPI00005657 | K | 66   |
| IPI00005658 | K | 48   |
| IPI00005658 | K | 54   |
| IPI00005668 | K | 4    |
| IPI00005668 | K | 31   |
| IPI00005668 | K | 33   |
| IPI00005668 | K | 161  |
| IPI00005668 | K | 179  |
| IPI00005668 | K | 246  |
| IPI00005677 | K | 128  |
| IPI00005677 | K | 643  |
| IPI00005677 | K | 644  |
| IPI00005724 | K | 142  |
| IPI00005744 | K | 30   |
| IPI00005792 | K | 207  |
| IPI00005822 | K | 467  |
| IPI00005966 | K | 43   |
| IPI00005966 | K | 47   |
| IPI00005969 | K | 19   |
| IPI00005969 | K | 97   |
| IPI00005969 | K | 273  |
| IPI00005978 | K | 36   |
| IPI00005996 | K | 26   |
| IPI00006034 | K | 23   |
| IPI00006034 | K | 138  |
| IPI00006077 | K | 30   |
| IPI00006077 | K | 32   |
| IPI00006077 | K | 38   |
| IPI00006077 | K | 39   |
| IPI00006077 | K | 461  |
| IPI00006077 | K | 638  |
| IPI00006077 | K | 735  |
| IPI00006077 | K | 738  |
| IPI00006079 | K | 152  |
| IPI00006079 | K | 335  |
| IPI00006079 | K | 421  |
| IPI00006079 | K | 437  |
| IPI00006079 | K | 637  |
| IPI00006091 | K | 1017 |
| IPI00006092 | K | 149  |
| IPI00006108 | K | 138  |
| IPI00006108 | K | 188  |
| IPI00006108 | K | 405  |

Table S1

|             |   |      |
|-------------|---|------|
| IPI00006108 | K | 407  |
| IPI00006108 | K | 822  |
| IPI00006160 | K | 321  |
| IPI00006160 | K | 327  |
| IPI00006160 | K | 331  |
| IPI00006164 | K | 210  |
| IPI00006167 | K | 383  |
| IPI00006171 | K | 1262 |
| IPI00006176 | K | 207  |
| IPI00006176 | K | 494  |
| IPI00006181 | K | 53   |
| IPI00006204 | K | 315  |
| IPI00006211 | K | 3    |
| IPI00006213 | K | 399  |
| IPI00006252 | K | 33   |
| IPI00006379 | K | 441  |
| IPI00006379 | K | 460  |
| IPI00006379 | K | 461  |
| IPI00006379 | K | 463  |
| IPI00006440 | K | 208  |
| IPI00006440 | K | 228  |
| IPI00006475 | K | 144  |
| IPI00006579 | K | 53   |
| IPI00006579 | K | 60   |
| IPI00006601 | K | 153  |
| IPI00006615 | K | 589  |
| IPI00006658 | K | 57   |
| IPI00006663 | K | 81   |
| IPI00006663 | K | 355  |
| IPI00006663 | K | 368  |
| IPI00006725 | K | 642  |
| IPI00006863 | K | 166  |
| IPI00006865 | K | 38   |
| IPI00006907 | K | 50   |
| IPI00006932 | K | 188  |
| IPI00006935 | K | 47   |
| IPI00006935 | K | 68   |
| IPI00006937 | K | 8    |
| IPI00006937 | K | 17   |
| IPI00006952 | K | 102  |
| IPI00006952 | K | 103  |
| IPI00006952 | K | 247  |
| IPI00006980 | K | 20   |
| IPI00006980 | K | 41   |
| IPI00006980 | K | 58   |
| IPI00006980 | K | 62   |
| IPI00006980 | K | 98   |
| IPI00006987 | K | 17   |
| IPI00006987 | K | 71   |
| IPI00007004 | K | 208  |
| IPI00007009 | K | 44   |
| IPI00007009 | K | 47   |



Table S1

|             |   |     |
|-------------|---|-----|
| IPI00007049 | K | 131 |
| IPI00007058 | K | 233 |
| IPI00007074 | K | 146 |
| IPI00007074 | K | 147 |
| IPI00007074 | K | 197 |
| IPI00007074 | K | 206 |
| IPI00007074 | K | 272 |
| IPI00007074 | K | 474 |
| IPI00007074 | K | 482 |
| IPI00007074 | K | 490 |
| IPI00007084 | K | 484 |
| IPI00007088 | K | 169 |
| IPI00007123 | K | 86  |
| IPI00007128 | K | 197 |
| IPI00007156 | K | 95  |
| IPI00007188 | K | 23  |
| IPI00007188 | K | 92  |
| IPI00007188 | K | 94  |
| IPI00007188 | K | 96  |
| IPI00007188 | K | 105 |
| IPI00007188 | K | 163 |
| IPI00007188 | K | 166 |
| IPI00007188 | K | 199 |
| IPI00007188 | K | 268 |
| IPI00007188 | K | 272 |
| IPI00007189 | K | 135 |
| IPI00007189 | K | 144 |
| IPI00007247 | K | 60  |
| IPI00007311 | K | 53  |
| IPI00007311 | K | 60  |
| IPI00007311 | K | 71  |
| IPI00007311 | K | 76  |
| IPI00007334 | K | 359 |
| IPI00007334 | K | 717 |
| IPI00007346 | K | 38  |
| IPI00007395 | K | 40  |
| IPI00007404 | K | 306 |
| IPI00007423 | K | 86  |
| IPI00007611 | K | 54  |
| IPI00007611 | K | 60  |
| IPI00007611 | K | 70  |
| IPI00007611 | K | 158 |
| IPI00007611 | K | 162 |
| IPI00007611 | K | 172 |
| IPI00007611 | K | 176 |
| IPI00007611 | K | 192 |
| IPI00007641 | K | 3   |
| IPI00007641 | K | 34  |
| IPI00007675 | K | 429 |
| IPI00007694 | K | 6   |
| IPI00007694 | K | 30  |
| IPI00007722 | K | 516 |

Table S1

|             |   |      |
|-------------|---|------|
| IPI00007750 | K | 40   |
| IPI00007750 | K | 163  |
| IPI00007750 | K | 280  |
| IPI00007750 | K | 311  |
| IPI00007750 | K | 394  |
| IPI00007750 | K | 401  |
| IPI00007752 | K | 58   |
| IPI00007752 | K | 103  |
| IPI00007752 | K | 297  |
| IPI00007752 | K | 379  |
| IPI00007755 | K | 115  |
| IPI00007756 | K | 101  |
| IPI00007757 | K | 288  |
| IPI00007765 | K | 121  |
| IPI00007765 | K | 135  |
| IPI00007765 | K | 138  |
| IPI00007765 | K | 143  |
| IPI00007765 | K | 234  |
| IPI00007765 | K | 288  |
| IPI00007765 | K | 300  |
| IPI00007765 | K | 345  |
| IPI00007765 | K | 567  |
| IPI00007765 | K | 595  |
| IPI00007765 | K | 610  |
| IPI00007765 | K | 646  |
| IPI00007765 | K | 675  |
| IPI00007797 | K | 17   |
| IPI00007797 | K | 55   |
| IPI00007811 | K | 35   |
| IPI00007913 | K | 128  |
| IPI00007927 | K | 114  |
| IPI00007927 | K | 222  |
| IPI00007927 | K | 320  |
| IPI00007927 | K | 321  |
| IPI00007927 | K | 330  |
| IPI00007927 | K | 677  |
| IPI00007927 | K | 1158 |
| IPI00007927 | K | 1160 |
| IPI00007928 | K | 1463 |
| IPI00007940 | K | 269  |
| IPI00007941 | K | 165  |
| IPI00007983 | K | 282  |
| IPI00007993 | K | 333  |
| IPI00008054 | K | 105  |
| IPI00008054 | K | 447  |
| IPI00008054 | K | 449  |
| IPI00008054 | K | 546  |
| IPI00008054 | K | 550  |
| IPI00008054 | K | 554  |
| IPI00008054 | K | 671  |
| IPI00008091 | K | 118  |
| IPI00008164 | K | 157  |

Table S1

|             |   |     |
|-------------|---|-----|
| IPI00008215 | K | 60  |
| IPI00008215 | K | 84  |
| IPI00008223 | K | 45  |
| IPI00008240 | K | 726 |
| IPI00008248 | K | 263 |
| IPI00008274 | K | 81  |
| IPI00008274 | K | 209 |
| IPI00008359 | K | 193 |
| IPI00008380 | K | 4   |
| IPI00008422 | K | 729 |
| IPI00008433 | K | 47  |
| IPI00008433 | K | 182 |
| IPI00008438 | K | 17  |
| IPI00008438 | K | 24  |
| IPI00008454 | K | 43  |
| IPI00008454 | K | 47  |
| IPI00008475 | K | 46  |
| IPI00008475 | K | 246 |
| IPI00008475 | K | 273 |
| IPI00008475 | K | 321 |
| IPI00008475 | K | 330 |
| IPI00008475 | K | 409 |
| IPI00008477 | K | 305 |
| IPI00008524 | K | 104 |
| IPI00008524 | K | 108 |
| IPI00008524 | K | 213 |
| IPI00008524 | K | 259 |
| IPI00008524 | K | 512 |
| IPI00008528 | K | 49  |
| IPI00008528 | K | 54  |
| IPI00008529 | K | 21  |
| IPI00008529 | K | 24  |
| IPI00008529 | K | 49  |
| IPI00008530 | K | 77  |
| IPI00008530 | K | 246 |
| IPI00008531 | K | 418 |
| IPI00008552 | K | 92  |
| IPI00008570 | K | 152 |
| IPI00008570 | K | 153 |
| IPI00008575 | K | 165 |
| IPI00008575 | K | 169 |
| IPI00008575 | K | 175 |
| IPI00008579 | K | 202 |
| IPI00008599 | K | 221 |
| IPI00008603 | K | 63  |
| IPI00008603 | K | 328 |
| IPI00008708 | K | 461 |
| IPI00008708 | K | 468 |
| IPI00008728 | K | 178 |
| IPI00008728 | K | 437 |
| IPI00008868 | K | 506 |
| IPI00008868 | K | 685 |

Table S1

|             |   |      |
|-------------|---|------|
| IPI00008868 | K | 686  |
| IPI00008868 | K | 693  |
| IPI00008868 | K | 694  |
| IPI00008868 | K | 790  |
| IPI00008934 | K | 83   |
| IPI00008934 | K | 437  |
| IPI00008943 | K | 229  |
| IPI00008965 | K | 268  |
| IPI00008965 | K | 271  |
| IPI00008965 | K | 273  |
| IPI00008982 | K | 649  |
| IPI00009032 | K | 116  |
| IPI00009032 | K | 128  |
| IPI00009032 | K | 328  |
| IPI00009032 | K | 360  |
| IPI00009104 | K | 417  |
| IPI00009213 | K | 851  |
| IPI00009236 | K | 5    |
| IPI00009247 | K | 31   |
| IPI00009253 | K | 94   |
| IPI00009253 | K | 203  |
| IPI00009286 | K | 636  |
| IPI00009286 | K | 1130 |
| IPI00009286 | K | 1133 |
| IPI00009286 | K | 1235 |
| IPI00009305 | K | 50   |
| IPI00009305 | K | 51   |
| IPI00009305 | K | 64   |
| IPI00009328 | K | 60   |
| IPI00009328 | K | 296  |
| IPI00009328 | K | 321  |
| IPI00009373 | K | 69   |
| IPI00009373 | K | 74   |
| IPI00009373 | K | 91   |
| IPI00009439 | K | 237  |
| IPI00009448 | K | 81   |
| IPI00009532 | K | 333  |
| IPI00009604 | K | 466  |
| IPI00009634 | K | 135  |
| IPI00009634 | K | 173  |
| IPI00009634 | K | 180  |
| IPI00009688 | K | 89   |
| IPI00009688 | K | 91   |
| IPI00009688 | K | 145  |
| IPI00009713 | K | 61   |
| IPI00009713 | K | 253  |
| IPI00009713 | K | 398  |
| IPI00009724 | K | 169  |
| IPI00009724 | K | 172  |
| IPI00009724 | K | 175  |
| IPI00009724 | K | 179  |
| IPI00009724 | K | 188  |

Table S1

|             |   |     |
|-------------|---|-----|
| IPI00009753 | K | 176 |
| IPI00009771 | K | 81  |
| IPI00009771 | K | 520 |
| IPI00009790 | K | 395 |
| IPI00009790 | K | 486 |
| IPI00009790 | K | 688 |
| IPI00009790 | K | 753 |
| IPI00009822 | K | 81  |
| IPI00009844 | K | 13  |
| IPI00009844 | K | 291 |
| IPI00009867 | K | 178 |
| IPI00009889 | K | 26  |
| IPI00009895 | K | 121 |
| IPI00009901 | K | 4   |
| IPI00009904 | K | 256 |
| IPI00009904 | K | 366 |
| IPI00009904 | K | 484 |
| IPI00009904 | K | 533 |
| IPI00009931 | K | 15  |
| IPI00009943 | K | 93  |
| IPI00009943 | K | 97  |
| IPI00009943 | K | 112 |
| IPI00009958 | K | 47  |
| IPI00009958 | K | 326 |
| IPI00009960 | K | 211 |
| IPI00009960 | K | 222 |
| IPI00009960 | K | 451 |
| IPI00009960 | K | 506 |
| IPI00009992 | K | 272 |
| IPI00010080 | K | 42  |
| IPI00010080 | K | 46  |
| IPI00010085 | K | 250 |
| IPI00010085 | K | 269 |
| IPI00010085 | K | 356 |
| IPI00010090 | K | 263 |
| IPI00010133 | K | 339 |
| IPI00010133 | K | 449 |
| IPI00010157 | K | 81  |
| IPI00010158 | K | 102 |
| IPI00010188 | K | 90  |
| IPI00010188 | K | 93  |
| IPI00010190 | K | 151 |
| IPI00010190 | K | 291 |
| IPI00010193 | K | 399 |
| IPI00010196 | K | 111 |
| IPI00010196 | K | 158 |
| IPI00010196 | K | 286 |
| IPI00010196 | K | 310 |
| IPI00010196 | K | 446 |
| IPI00010196 | K | 481 |
| IPI00010196 | K | 528 |
| IPI00010196 | K | 606 |

Table S1

|             |   |      |
|-------------|---|------|
| IPI00010196 | K | 931  |
| IPI00010204 | K | 23   |
| IPI00010214 | K | 27   |
| IPI00010252 | K | 252  |
| IPI00010252 | K | 763  |
| IPI00010252 | K | 769  |
| IPI00010252 | K | 951  |
| IPI00010252 | K | 953  |
| IPI00010270 | K | 147  |
| IPI00010290 | K | 46   |
| IPI00010320 | K | 33   |
| IPI00010320 | K | 35   |
| IPI00010320 | K | 41   |
| IPI00010320 | K | 84   |
| IPI00010320 | K | 139  |
| IPI00010346 | K | 664  |
| IPI00010349 | K | 102  |
| IPI00010349 | K | 169  |
| IPI00010349 | K | 347  |
| IPI00010365 | K | 197  |
| IPI00010404 | K | 17   |
| IPI00010414 | K | 22   |
| IPI00010415 | K | 78   |
| IPI00010415 | K | 168  |
| IPI00010415 | K | 198  |
| IPI00010415 | K | 283  |
| IPI00010420 | K | 104  |
| IPI00010471 | K | 76   |
| IPI00010471 | K | 88   |
| IPI00010471 | K | 294  |
| IPI00010471 | K | 297  |
| IPI00010471 | K | 361  |
| IPI00010471 | K | 468  |
| IPI00010471 | K | 472  |
| IPI00010471 | K | 542  |
| IPI00010471 | K | 579  |
| IPI00010586 | K | 522  |
| IPI00010700 | K | 27   |
| IPI00010700 | K | 29   |
| IPI00010700 | K | 1196 |
| IPI00010706 | K | 186  |
| IPI00010720 | K | 223  |
| IPI00010720 | K | 232  |
| IPI00010720 | K | 399  |
| IPI00010740 | K | 319  |
| IPI00010740 | K | 330  |
| IPI00010740 | K | 338  |
| IPI00010740 | K | 421  |
| IPI00010740 | K | 472  |
| IPI00010796 | K | 103  |
| IPI00010796 | K | 375  |
| IPI00010796 | K | 444  |

Table S1

|             |   |      |
|-------------|---|------|
| IPI00010833 | K | 607  |
| IPI00010847 | K | 122  |
| IPI00010847 | K | 125  |
| IPI00010847 | K | 131  |
| IPI00010863 | K | 57   |
| IPI00010863 | K | 60   |
| IPI00010872 | K | 149  |
| IPI00010896 | K | 13   |
| IPI00010896 | K | 49   |
| IPI00010896 | K | 119  |
| IPI00010896 | K | 131  |
| IPI00010896 | K | 135  |
| IPI00011051 | K | 236  |
| IPI00011062 | K | 55   |
| IPI00011062 | K | 119  |
| IPI00011062 | K | 287  |
| IPI00011062 | K | 527  |
| IPI00011062 | K | 841  |
| IPI00011062 | K | 892  |
| IPI00011062 | K | 1291 |
| IPI00011069 | K | 5    |
| IPI00011069 | K | 295  |
| IPI00011075 | K | 129  |
| IPI00011102 | K | 242  |
| IPI00011107 | K | 67   |
| IPI00011107 | K | 80   |
| IPI00011107 | K | 106  |
| IPI00011107 | K | 133  |
| IPI00011107 | K | 155  |
| IPI00011107 | K | 166  |
| IPI00011107 | K | 180  |
| IPI00011107 | K | 256  |
| IPI00011107 | K | 263  |
| IPI00011107 | K | 272  |
| IPI00011107 | K | 275  |
| IPI00011107 | K | 282  |
| IPI00011107 | K | 413  |
| IPI00011107 | K | 442  |
| IPI00011126 | K | 258  |
| IPI00011201 | K | 94   |
| IPI00011201 | K | 156  |
| IPI00011201 | K | 224  |
| IPI00011201 | K | 240  |
| IPI00011201 | K | 272  |
| IPI00011201 | K | 346  |
| IPI00011253 | K | 62   |
| IPI00011268 | K | 165  |
| IPI00011274 | K | 216  |
| IPI00011276 | K | 241  |
| IPI00011285 | K | 84   |
| IPI00011307 | K | 50   |
| IPI00011416 | K | 83   |

Table S1

|             |   |     |
|-------------|---|-----|
| IPI00011416 | K | 95  |
| IPI00011416 | K | 318 |
| IPI00011416 | K | 327 |
| IPI00011511 | K | 69  |
| IPI00011518 | K | 126 |
| IPI00011518 | K | 275 |
| IPI00011518 | K | 279 |
| IPI00011518 | K | 285 |
| IPI00011518 | K | 299 |
| IPI00011518 | K | 300 |
| IPI00011518 | K | 307 |
| IPI00011568 | K | 136 |
| IPI00011603 | K | 14  |
| IPI00011631 | K | 777 |
| IPI00011696 | K | 222 |
| IPI00011696 | K | 252 |
| IPI00011696 | K | 716 |
| IPI00011770 | K | 55  |
| IPI00011857 | K | 494 |
| IPI00011875 | K | 83  |
| IPI00011875 | K | 98  |
| IPI00011875 | K | 386 |
| IPI00011875 | K | 408 |
| IPI00011923 | K | 250 |
| IPI00011970 | K | 321 |
| IPI00012007 | K | 188 |
| IPI00012007 | K | 401 |
| IPI00012007 | K | 408 |
| IPI00012011 | K | 13  |
| IPI00012011 | K | 19  |
| IPI00012011 | K | 44  |
| IPI00012011 | K | 73  |
| IPI00012011 | K | 92  |
| IPI00012011 | K | 95  |
| IPI00012011 | K | 114 |
| IPI00012011 | K | 121 |
| IPI00012011 | K | 132 |
| IPI00012011 | K | 144 |
| IPI00012028 | K | 41  |
| IPI00012069 | K | 59  |
| IPI00012069 | K | 209 |
| IPI00012069 | K | 262 |
| IPI00012079 | K | 591 |
| IPI00012119 | K | 138 |
| IPI00012119 | K | 147 |
| IPI00012149 | K | 609 |
| IPI00012174 | K | 114 |
| IPI00012174 | K | 115 |
| IPI00012174 | K | 117 |
| IPI00012174 | K | 120 |
| IPI00012199 | K | 212 |
| IPI00012199 | K | 213 |



Table S1

|             |   |     |
|-------------|---|-----|
| IPI00012341 | K | 167 |
| IPI00012345 | K | 101 |
| IPI00012382 | K | 60  |
| IPI00012442 | K | 353 |
| IPI00012442 | K | 357 |
| IPI00012442 | K | 376 |
| IPI00012446 | K | 34  |
| IPI00012446 | K | 38  |
| IPI00012446 | K | 72  |
| IPI00012535 | K | 32  |
| IPI00012535 | K | 44  |
| IPI00012535 | K | 66  |
| IPI00012567 | K | 322 |
| IPI00012567 | K | 327 |
| IPI00012567 | K | 329 |
| IPI00012567 | K | 332 |
| IPI00012587 | K | 6   |
| IPI00012587 | K | 125 |
| IPI00012587 | K | 128 |
| IPI00012587 | K | 402 |
| IPI00012726 | K | 104 |
| IPI00012726 | K | 108 |
| IPI00012728 | K | 543 |
| IPI00012728 | K | 632 |
| IPI00012750 | K | 52  |
| IPI00012750 | K | 60  |
| IPI00012750 | K | 66  |
| IPI00012750 | K | 94  |
| IPI00012756 | K | 150 |
| IPI00012759 | K | 14  |
| IPI00012772 | K | 46  |
| IPI00012773 | K | 626 |
| IPI00012788 | K | 176 |
| IPI00012795 | K | 264 |
| IPI00012816 | K | 265 |
| IPI00012816 | K | 274 |
| IPI00012816 | K | 288 |
| IPI00012820 | K | 379 |
| IPI00012837 | K | 28  |
| IPI00012837 | K | 32  |
| IPI00012837 | K | 166 |
| IPI00012912 | K | 510 |
| IPI00012912 | K | 537 |
| IPI00012912 | K | 544 |
| IPI00012948 | K | 95  |
| IPI00012948 | K | 96  |
| IPI00012948 | K | 97  |
| IPI00012948 | K | 99  |
| IPI00012948 | K | 104 |
| IPI00012972 | K | 91  |
| IPI00013068 | K | 275 |
| IPI00013070 | K | 270 |

Table S1

|             |   |      |
|-------------|---|------|
| IPI00013122 | K | 45   |
| IPI00013122 | K | 78   |
| IPI00013122 | K | 154  |
| IPI00013122 | K | 240  |
| IPI00013122 | K | 330  |
| IPI00013146 | K | 211  |
| IPI00013146 | K | 255  |
| IPI00013146 | K | 258  |
| IPI00013159 | K | 11   |
| IPI00013159 | K | 302  |
| IPI00013160 | K | 333  |
| IPI00013160 | K | 337  |
| IPI00013180 | K | 125  |
| IPI00013184 | K | 136  |
| IPI00013185 | K | 205  |
| IPI00013205 | K | 602  |
| IPI00013215 | K | 326  |
| IPI00013290 | K | 39   |
| IPI00013296 | K | 8    |
| IPI00013296 | K | 78   |
| IPI00013296 | K | 94   |
| IPI00013296 | K | 106  |
| IPI00013297 | K | 132  |
| IPI00013396 | K | 52   |
| IPI00013404 | K | 37   |
| IPI00013404 | K | 45   |
| IPI00013404 | K | 106  |
| IPI00013404 | K | 428  |
| IPI00013404 | K | 507  |
| IPI00013415 | K | 70   |
| IPI00013415 | K | 74   |
| IPI00013415 | K | 169  |
| IPI00013452 | K | 300  |
| IPI00013452 | K | 417  |
| IPI00013452 | K | 497  |
| IPI00013452 | K | 498  |
| IPI00013452 | K | 535  |
| IPI00013452 | K | 542  |
| IPI00013452 | K | 637  |
| IPI00013452 | K | 788  |
| IPI00013452 | K | 1156 |
| IPI00013452 | K | 1503 |
| IPI00013466 | K | 330  |
| IPI00013468 | K | 179  |
| IPI00013485 | K | 263  |
| IPI00013485 | K | 275  |
| IPI00013508 | K | 492  |
| IPI00013683 | K | 58   |
| IPI00013683 | K | 297  |
| IPI00013721 | K | 358  |
| IPI00013721 | K | 656  |
| IPI00013721 | K | 717  |

Table S1

|             |   |     |
|-------------|---|-----|
| IPI00013721 | K | 905 |
| IPI00013721 | K | 907 |
| IPI00013723 | K | 46  |
| IPI00013743 | K | 47  |
| IPI00013774 | K | 74  |
| IPI00013774 | K | 89  |
| IPI00013774 | K | 218 |
| IPI00013774 | K | 220 |
| IPI00013774 | K | 361 |
| IPI00013774 | K | 432 |
| IPI00013774 | K | 438 |
| IPI00013774 | K | 439 |
| IPI00013774 | K | 441 |
| IPI00013808 | K | 114 |
| IPI00013808 | K | 214 |
| IPI00013808 | K | 217 |
| IPI00013808 | K | 417 |
| IPI00013808 | K | 592 |
| IPI00013808 | K | 625 |
| IPI00013809 | K | 32  |
| IPI00013830 | K | 115 |
| IPI00013830 | K | 213 |
| IPI00013830 | K | 216 |
| IPI00013830 | K | 217 |
| IPI00013847 | K | 111 |
| IPI00013847 | K | 138 |
| IPI00013847 | K | 248 |
| IPI00013862 | K | 169 |
| IPI00013871 | K | 17  |
| IPI00013871 | K | 376 |
| IPI00013871 | K | 496 |
| IPI00013881 | K | 167 |
| IPI00013894 | K | 8   |
| IPI00013894 | K | 68  |
| IPI00013894 | K | 73  |
| IPI00013894 | K | 100 |
| IPI00013894 | K | 246 |
| IPI00013894 | K | 301 |
| IPI00013894 | K | 312 |
| IPI00013894 | K | 325 |
| IPI00013894 | K | 344 |
| IPI00013894 | K | 388 |
| IPI00013894 | K | 446 |
| IPI00013895 | K | 3   |
| IPI00013914 | K | 983 |
| IPI00013949 | K | 137 |
| IPI00013957 | K | 148 |
| IPI00013957 | K | 244 |
| IPI00013991 | K | 118 |
| IPI00013999 | K | 245 |
| IPI00013999 | K | 246 |
| IPI00013999 | K | 312 |

Table S1

|             |   |      |
|-------------|---|------|
| IPI00013999 | K | 314  |
| IPI00013999 | K | 315  |
| IPI00013999 | K | 316  |
| IPI00014068 | K | 455  |
| IPI00014068 | K | 467  |
| IPI00014149 | K | 255  |
| IPI00014197 | K | 15   |
| IPI00014198 | K | 116  |
| IPI00014199 | K | 274  |
| IPI00014213 | K | 236  |
| IPI00014230 | K | 91   |
| IPI00014230 | K | 95   |
| IPI00014230 | K | 179  |
| IPI00014256 | K | 751  |
| IPI00014266 | K | 304  |
| IPI00014305 | K | 135  |
| IPI00014305 | K | 140  |
| IPI00014311 | K | 412  |
| IPI00014344 | K | 105  |
| IPI00014361 | K | 147  |
| IPI00014424 | K | 41   |
| IPI00014424 | K | 44   |
| IPI00014424 | K | 179  |
| IPI00014424 | K | 439  |
| IPI00014456 | K | 689  |
| IPI00014474 | K | 538  |
| IPI00014513 | K | 174  |
| IPI00014533 | K | 61   |
| IPI00014575 | K | 92   |
| IPI00014575 | K | 105  |
| IPI00014575 | K | 109  |
| IPI00014577 | K | 138  |
| IPI00014898 | K | 187  |
| IPI00014898 | K | 2841 |
| IPI00014898 | K | 3091 |
| IPI00014898 | K | 3420 |
| IPI00014898 | K | 4491 |
| IPI00014903 | K | 7    |
| IPI00014911 | K | 405  |
| IPI00014911 | K | 1104 |
| IPI00014925 | K | 376  |
| IPI00014925 | K | 380  |
| IPI00014925 | K | 382  |
| IPI00014925 | K | 385  |
| IPI00014925 | K | 386  |
| IPI00014938 | K | 142  |
| IPI00015018 | K | 57   |
| IPI00015018 | K | 228  |
| IPI00015029 | K | 7    |
| IPI00015029 | K | 33   |
| IPI00015077 | K | 58   |
| IPI00015077 | K | 61   |

Table S1

|             |   |      |
|-------------|---|------|
| IPI00015105 | K | 4    |
| IPI00015180 | K | 1341 |
| IPI00015262 | K | 8    |
| IPI00015262 | K | 25   |
| IPI00015286 | K | 1602 |
| IPI00015286 | K | 1605 |
| IPI00015361 | K | 42   |
| IPI00015361 | K | 112  |
| IPI00015388 | K | 176  |
| IPI00015602 | K | 185  |
| IPI00015602 | K | 441  |
| IPI00015602 | K | 470  |
| IPI00015609 | K | 61   |
| IPI00015671 | K | 401  |
| IPI00015671 | K | 408  |
| IPI00015811 | K | 124  |
| IPI00015811 | K | 208  |
| IPI00015811 | K | 209  |
| IPI00015811 | K | 211  |
| IPI00015811 | K | 213  |
| IPI00015811 | K | 214  |
| IPI00015826 | K | 265  |
| IPI00015833 | K | 142  |
| IPI00015842 | K | 86   |
| IPI00015856 | K | 41   |
| IPI00015864 | K | 684  |
| IPI00015865 | K | 109  |
| IPI00015905 | K | 165  |
| IPI00015911 | K | 127  |
| IPI00015911 | K | 143  |
| IPI00015911 | K | 267  |
| IPI00015911 | K | 320  |
| IPI00015911 | K | 410  |
| IPI00015911 | K | 417  |
| IPI00015911 | K | 420  |
| IPI00015934 | K | 369  |
| IPI00015947 | K | 44   |
| IPI00015947 | K | 46   |
| IPI00015953 | K | 779  |
| IPI00015972 | K | 60   |
| IPI00015973 | K | 514  |
| IPI00016007 | K | 864  |
| IPI00016077 | K | 148  |
| IPI00016284 | K | 537  |
| IPI00016284 | K | 538  |
| IPI00016287 | K | 281  |
| IPI00016339 | K | 23   |
| IPI00016405 | K | 96   |
| IPI00016405 | K | 131  |
| IPI00016457 | K | 261  |
| IPI00016457 | K | 268  |
| IPI00016458 | K | 104  |

Table S1

|             |   |      |
|-------------|---|------|
| IPI00016458 | K | 155  |
| IPI00016513 | K | 102  |
| IPI00016532 | K | 27   |
| IPI00016532 | K | 186  |
| IPI00016532 | K | 233  |
| IPI00016559 | K | 68   |
| IPI00016568 | K | 179  |
| IPI00016568 | K | 186  |
| IPI00016572 | K | 16   |
| IPI00016589 | K | 23   |
| IPI00016610 | K | 23   |
| IPI00016613 | K | 102  |
| IPI00016621 | K | 35   |
| IPI00016637 | K | 174  |
| IPI00016780 | K | 1426 |
| IPI00016780 | K | 1432 |
| IPI00016783 | K | 115  |
| IPI00016801 | K | 84   |
| IPI00016801 | K | 346  |
| IPI00016801 | K | 415  |
| IPI00016801 | K | 457  |
| IPI00016801 | K | 480  |
| IPI00016801 | K | 503  |
| IPI00016801 | K | 527  |
| IPI00016801 | K | 545  |
| IPI00016862 | K | 110  |
| IPI00016862 | K | 401  |
| IPI00016910 | K | 558  |
| IPI00017283 | K | 189  |
| IPI00017283 | K | 233  |
| IPI00017283 | K | 241  |
| IPI00017283 | K | 661  |
| IPI00017283 | K | 664  |
| IPI00017283 | K | 775  |
| IPI00017283 | K | 781  |
| IPI00017292 | K | 19   |
| IPI00017292 | K | 49   |
| IPI00017292 | K | 345  |
| IPI00017297 | K | 3    |
| IPI00017297 | K | 146  |
| IPI00017297 | K | 473  |
| IPI00017297 | K | 522  |
| IPI00017297 | K | 571  |
| IPI00017297 | K | 836  |
| IPI00017303 | K | 555  |
| IPI00017303 | K | 635  |
| IPI00017305 | K | 75   |
| IPI00017334 | K | 202  |
| IPI00017344 | K | 22   |
| IPI00017376 | K | 320  |
| IPI00017381 | K | 6    |
| IPI00017381 | K | 13   |

Table S1

|             |   |     |
|-------------|---|-----|
| IPI00017412 | K | 163 |
| IPI00017412 | K | 304 |
| IPI00017448 | K | 81  |
| IPI00017450 | K | 407 |
| IPI00017451 | K | 55  |
| IPI00017451 | K | 251 |
| IPI00017469 | K | 247 |
| IPI00017558 | K | 219 |
| IPI00017558 | K | 225 |
| IPI00017592 | K | 597 |
| IPI00017596 | K | 60  |
| IPI00017596 | K | 66  |
| IPI00017596 | K | 220 |
| IPI00017617 | K | 32  |
| IPI00017617 | K | 33  |
| IPI00017617 | K | 40  |
| IPI00017659 | K | 81  |
| IPI00017672 | K | 95  |
| IPI00017704 | K | 102 |
| IPI00017704 | K | 110 |
| IPI00017704 | K | 126 |
| IPI00017799 | K | 183 |
| IPI00017816 | K | 99  |
| IPI00017816 | K | 101 |
| IPI00017855 | K | 50  |
| IPI00017855 | K | 520 |
| IPI00017855 | K | 573 |
| IPI00017855 | K | 605 |
| IPI00017895 | K | 634 |
| IPI00018027 | K | 664 |
| IPI00018098 | K | 227 |
| IPI00018120 | K | 175 |
| IPI00018120 | K | 207 |
| IPI00018140 | K | 100 |
| IPI00018140 | K | 221 |
| IPI00018140 | K | 363 |
| IPI00018146 | K | 3   |
| IPI00018146 | K | 9   |
| IPI00018146 | K | 49  |
| IPI00018146 | K | 68  |
| IPI00018146 | K | 115 |
| IPI00018146 | K | 120 |
| IPI00018206 | K | 73  |
| IPI00018206 | K | 90  |
| IPI00018206 | K | 94  |
| IPI00018206 | K | 150 |
| IPI00018206 | K | 159 |
| IPI00018206 | K | 185 |
| IPI00018206 | K | 234 |
| IPI00018206 | K | 296 |
| IPI00018206 | K | 345 |
| IPI00018206 | K | 363 |

Table S1

|             |   |     |
|-------------|---|-----|
| IPI00018206 | K | 396 |
| IPI00018206 | K | 404 |
| IPI00018214 | K | 40  |
| IPI00018214 | K | 66  |
| IPI00018214 | K | 153 |
| IPI00018214 | K | 154 |
| IPI00018251 | K | 31  |
| IPI00018251 | K | 636 |
| IPI00018251 | K | 640 |
| IPI00018251 | K | 780 |
| IPI00018251 | K | 785 |
| IPI00018251 | K | 788 |
| IPI00018278 | K | 5   |
| IPI00018278 | K | 8   |
| IPI00018278 | K | 12  |
| IPI00018278 | K | 14  |
| IPI00018279 | K | 247 |
| IPI00018279 | K | 249 |
| IPI00018279 | K | 251 |
| IPI00018279 | K | 254 |
| IPI00018279 | K | 255 |
| IPI00018349 | K | 220 |
| IPI00018349 | K | 450 |
| IPI00018349 | K | 627 |
| IPI00018350 | K | 392 |
| IPI00018350 | K | 396 |
| IPI00018350 | K | 696 |
| IPI00018352 | K | 195 |
| IPI00018402 | K | 451 |
| IPI00018402 | K | 463 |
| IPI00018452 | K | 171 |
| IPI00018465 | K | 67  |
| IPI00018465 | K | 172 |
| IPI00018465 | K | 217 |
| IPI00018465 | K | 320 |
| IPI00018465 | K | 366 |
| IPI00018534 | K | 6   |
| IPI00018534 | K | 12  |
| IPI00018534 | K | 13  |
| IPI00018534 | K | 16  |
| IPI00018534 | K | 17  |
| IPI00018534 | K | 21  |
| IPI00018534 | K | 24  |
| IPI00018534 | K | 109 |
| IPI00018534 | K | 121 |
| IPI00018627 | K | 34  |
| IPI00018627 | K | 37  |
| IPI00018627 | K | 140 |
| IPI00018627 | K | 152 |
| IPI00018627 | K | 155 |
| IPI00018755 | K | 82  |
| IPI00018755 | K | 157 |



Table S1

|             |   |      |
|-------------|---|------|
| IPI00018768 | K | 187  |
| IPI00018768 | K | 199  |
| IPI00018823 | K | 512  |
| IPI00018824 | K | 152  |
| IPI00018829 | K | 131  |
| IPI00018842 | K | 33   |
| IPI00018842 | K | 38   |
| IPI00018842 | K | 90   |
| IPI00018931 | K | 555  |
| IPI00018931 | K | 556  |
| IPI00018968 | K | 6    |
| IPI00019004 | K | 110  |
| IPI00019004 | K | 143  |
| IPI00019046 | K | 212  |
| IPI00019148 | K | 241  |
| IPI00019226 | K | 481  |
| IPI00019329 | K | 36   |
| IPI00019353 | K | 6    |
| IPI00019380 | K | 204  |
| IPI00019380 | K | 698  |
| IPI00019400 | K | 58   |
| IPI00019400 | K | 77   |
| IPI00019427 | K | 5    |
| IPI00019450 | K | 224  |
| IPI00019450 | K | 359  |
| IPI00019472 | K | 537  |
| IPI00019502 | K | 8    |
| IPI00019502 | K | 74   |
| IPI00019502 | K | 102  |
| IPI00019502 | K | 299  |
| IPI00019502 | K | 545  |
| IPI00019502 | K | 821  |
| IPI00019502 | K | 992  |
| IPI00019502 | K | 1024 |
| IPI00019502 | K | 1274 |
| IPI00019502 | K | 1301 |
| IPI00019502 | K | 1357 |
| IPI00019502 | K | 1392 |
| IPI00019502 | K | 1404 |
| IPI00019502 | K | 1410 |
| IPI00019502 | K | 1441 |
| IPI00019502 | K | 1442 |
| IPI00019502 | K | 1459 |
| IPI00019502 | K | 1638 |
| IPI00019502 | K | 1828 |
| IPI00019548 | K | 19   |
| IPI00019548 | K | 20   |
| IPI00019548 | K | 39   |
| IPI00019600 | K | 72   |
| IPI00019755 | K | 57   |
| IPI00019755 | K | 65   |
| IPI00019755 | K | 66   |

Table S1

|             |   |      |
|-------------|---|------|
| IPI00019755 | K | 122  |
| IPI00019755 | K | 143  |
| IPI00019755 | K | 148  |
| IPI00019755 | K | 152  |
| IPI00019755 | K | 160  |
| IPI00019770 | K | 125  |
| IPI00019770 | K | 126  |
| IPI00019812 | K | 40   |
| IPI00019812 | K | 42   |
| IPI00019848 | K | 288  |
| IPI00019848 | K | 813  |
| IPI00019848 | K | 836  |
| IPI00019848 | K | 2005 |
| IPI00019868 | K | 15   |
| IPI00019868 | K | 102  |
| IPI00019868 | K | 103  |
| IPI00019868 | K | 105  |
| IPI00019868 | K | 108  |
| IPI00019868 | K | 112  |
| IPI00019868 | K | 116  |
| IPI00019869 | K | 27   |
| IPI00019888 | K | 126  |
| IPI00019888 | K | 135  |
| IPI00019888 | K | 358  |
| IPI00019912 | K | 46   |
| IPI00019912 | K | 139  |
| IPI00019912 | K | 140  |
| IPI00019912 | K | 565  |
| IPI00019912 | K | 663  |
| IPI00019912 | K | 669  |
| IPI00019912 | K | 707  |
| IPI00019927 | K | 204  |
| IPI00019927 | K | 214  |
| IPI00019977 | K | 67   |
| IPI00019981 | K | 52   |
| IPI00019992 | K | 407  |
| IPI00020008 | K | 48   |
| IPI00020021 | K | 326  |
| IPI00020039 | K | 286  |
| IPI00020042 | K | 238  |
| IPI00020042 | K | 397  |
| IPI00020042 | K | 401  |
| IPI00020042 | K | 418  |
| IPI00020101 | K | 6    |
| IPI00020101 | K | 12   |
| IPI00020101 | K | 13   |
| IPI00020101 | K | 16   |
| IPI00020101 | K | 17   |
| IPI00020101 | K | 21   |
| IPI00020101 | K | 24   |
| IPI00020101 | K | 25   |
| IPI00020101 | K | 109  |

Table S1

|             |   |      |
|-------------|---|------|
| IPI00020127 | K | 163  |
| IPI00020127 | K | 167  |
| IPI00020127 | K | 259  |
| IPI00020127 | K | 267  |
| IPI00020416 | K | 708  |
| IPI00020416 | K | 880  |
| IPI00020416 | K | 883  |
| IPI00020510 | K | 104  |
| IPI00020546 | K | 406  |
| IPI00020559 | K | 331  |
| IPI00020567 | K | 80   |
| IPI00020567 | K | 212  |
| IPI00020599 | K | 48   |
| IPI00020599 | K | 62   |
| IPI00020599 | K | 64   |
| IPI00020599 | K | 153  |
| IPI00020599 | K | 159  |
| IPI00020599 | K | 206  |
| IPI00020599 | K | 207  |
| IPI00020599 | K | 209  |
| IPI00020599 | K | 238  |
| IPI00020602 | K | 97   |
| IPI00020618 | K | 6    |
| IPI00020618 | K | 9    |
| IPI00020618 | K | 13   |
| IPI00020632 | K | 203  |
| IPI00020898 | K | 81   |
| IPI00020906 | K | 49   |
| IPI00020956 | K | 44   |
| IPI00020965 | K | 60   |
| IPI00020965 | K | 64   |
| IPI00020985 | K | 77   |
| IPI00020985 | K | 79   |
| IPI00020985 | K | 291  |
| IPI00020985 | K | 292  |
| IPI00020985 | K | 336  |
| IPI00020985 | K | 350  |
| IPI00020985 | K | 373  |
| IPI00020985 | K | 386  |
| IPI00020985 | K | 404  |
| IPI00020985 | K | 418  |
| IPI00020985 | K | 423  |
| IPI00020985 | K | 489  |
| IPI00020985 | K | 569  |
| IPI00020985 | K | 601  |
| IPI00020985 | K | 614  |
| IPI00020985 | K | 636  |
| IPI00020985 | K | 970  |
| IPI00020985 | K | 977  |
| IPI00020985 | K | 981  |
| IPI00020985 | K | 1001 |
| IPI00020985 | K | 1020 |

Table S1

|             |   |      |
|-------------|---|------|
| IPI00020985 | K | 1024 |
| IPI00020985 | K | 1045 |
| IPI00020985 | K | 1046 |
| IPI00020985 | K | 1047 |
| IPI00020985 | K | 1094 |
| IPI00020985 | K | 1103 |
| IPI00020985 | K | 1105 |
| IPI00020985 | K | 1144 |
| IPI00020985 | K | 1167 |
| IPI00020985 | K | 1180 |
| IPI00020985 | K | 1203 |
| IPI00020985 | K | 1228 |
| IPI00020985 | K | 1331 |
| IPI00020985 | K | 1336 |
| IPI00020985 | K | 1340 |
| IPI00020985 | K | 1427 |
| IPI00020985 | K | 1473 |
| IPI00020985 | K | 1499 |
| IPI00020985 | K | 1518 |
| IPI00020985 | K | 1528 |
| IPI00020985 | K | 1542 |
| IPI00020985 | K | 1546 |
| IPI00020985 | K | 1549 |
| IPI00020985 | K | 1550 |
| IPI00020985 | K | 1551 |
| IPI00020985 | K | 1554 |
| IPI00020985 | K | 1555 |
| IPI00020985 | K | 1558 |
| IPI00020985 | K | 1560 |
| IPI00020985 | K | 1568 |
| IPI00020985 | K | 1569 |
| IPI00020985 | K | 1570 |
| IPI00020985 | K | 1583 |
| IPI00020985 | K | 1590 |
| IPI00020985 | K | 1592 |
| IPI00020985 | K | 1637 |
| IPI00020985 | K | 1674 |
| IPI00020985 | K | 1699 |
| IPI00020985 | K | 1704 |
| IPI00020985 | K | 1707 |
| IPI00020985 | K | 1760 |
| IPI00020985 | K | 1762 |
| IPI00020985 | K | 1769 |
| IPI00020985 | K | 1772 |
| IPI00020985 | K | 1774 |
| IPI00020985 | K | 1783 |
| IPI00020985 | K | 1794 |
| IPI00020985 | K | 1800 |
| IPI00020985 | K | 1810 |
| IPI00020985 | K | 1812 |
| IPI00020985 | K | 2086 |
| IPI00020985 | K | 2091 |

Table S1

|             |   |      |
|-------------|---|------|
| IPI00021048 | K | 884  |
| IPI00021062 | K | 70   |
| IPI00021062 | K | 78   |
| IPI00021062 | K | 88   |
| IPI00021062 | K | 145  |
| IPI00021076 | K | 625  |
| IPI00021088 | K | 124  |
| IPI00021088 | K | 362  |
| IPI00021129 | K | 592  |
| IPI00021175 | K | 504  |
| IPI00021187 | K | 2    |
| IPI00021187 | K | 453  |
| IPI00021263 | K | 3    |
| IPI00021263 | K | 49   |
| IPI00021263 | K | 68   |
| IPI00021263 | K | 115  |
| IPI00021263 | K | 120  |
| IPI00021263 | K | 122  |
| IPI00021266 | K | 70   |
| IPI00021290 | K | 86   |
| IPI00021290 | K | 546  |
| IPI00021290 | K | 554  |
| IPI00021290 | K | 948  |
| IPI00021290 | K | 962  |
| IPI00021290 | K | 968  |
| IPI00021290 | K | 978  |
| IPI00021290 | K | 1077 |
| IPI00021327 | K | 6    |
| IPI00021327 | K | 38   |
| IPI00021327 | K | 50   |
| IPI00021327 | K | 109  |
| IPI00021338 | K | 466  |
| IPI00021347 | K | 9    |
| IPI00021347 | K | 131  |
| IPI00021347 | K | 138  |
| IPI00021369 | K | 92   |
| IPI00021370 | K | 14   |
| IPI00021405 | K | 97   |
| IPI00021405 | K | 108  |
| IPI00021405 | K | 114  |
| IPI00021405 | K | 233  |
| IPI00021405 | K | 260  |
| IPI00021405 | K | 261  |
| IPI00021405 | K | 270  |
| IPI00021405 | K | 311  |
| IPI00021405 | K | 316  |
| IPI00021405 | K | 378  |
| IPI00021405 | K | 417  |
| IPI00021405 | K | 450  |
| IPI00021405 | K | 470  |
| IPI00021428 | K | 52   |
| IPI00021428 | K | 63   |

Table S1

|             |   |      |
|-------------|---|------|
| IPI00021428 | K | 70   |
| IPI00021428 | K | 193  |
| IPI00021428 | K | 328  |
| IPI00021428 | K | 330  |
| IPI00021435 | K | 116  |
| IPI00021435 | K | 407  |
| IPI00021435 | K | 422  |
| IPI00021439 | K | 50   |
| IPI00021439 | K | 61   |
| IPI00021439 | K | 326  |
| IPI00021440 | K | 50   |
| IPI00021440 | K | 61   |
| IPI00021440 | K | 191  |
| IPI00021440 | K | 326  |
| IPI00021518 | K | 278  |
| IPI00021570 | K | 123  |
| IPI00021700 | K | 77   |
| IPI00021700 | K | 80   |
| IPI00021700 | K | 248  |
| IPI00021700 | K | 254  |
| IPI00021728 | K | 265  |
| IPI00021728 | K | 293  |
| IPI00021766 | K | 1104 |
| IPI00021785 | K | 121  |
| IPI00021805 | K | 42   |
| IPI00021805 | K | 55   |
| IPI00021808 | K | 443  |
| IPI00021812 | K | 884  |
| IPI00021828 | K | 78   |
| IPI00021828 | K | 91   |
| IPI00021831 | K | 367  |
| IPI00021840 | K | 30   |
| IPI00021840 | K | 203  |
| IPI00021840 | K | 211  |
| IPI00021885 | K | 620  |
| IPI00021885 | K | 625  |
| IPI00021924 | K | 47   |
| IPI00021924 | K | 179  |
| IPI00021924 | K | 180  |
| IPI00021924 | K | 182  |
| IPI00021924 | K | 185  |
| IPI00021926 | K | 15   |
| IPI00021926 | K | 20   |
| IPI00021926 | K | 72   |
| IPI00021926 | K | 206  |
| IPI00021978 | K | 43   |
| IPI00022018 | K | 197  |
| IPI00022019 | K | 104  |
| IPI00022055 | K | 416  |
| IPI00022055 | K | 428  |
| IPI00022055 | K | 430  |
| IPI00022055 | K | 441  |

Table S1

|             |   |      |
|-------------|---|------|
| IPI00022055 | K | 442  |
| IPI00022055 | K | 733  |
| IPI00022145 | K | 9    |
| IPI00022145 | K | 35   |
| IPI00022145 | K | 52   |
| IPI00022145 | K | 175  |
| IPI00022145 | K | 184  |
| IPI00022145 | K | 188  |
| IPI00022145 | K | 196  |
| IPI00022202 | K | 99   |
| IPI00022202 | K | 209  |
| IPI00022202 | K | 214  |
| IPI00022215 | K | 1035 |
| IPI00022215 | K | 1042 |
| IPI00022229 | K | 2004 |
| IPI00022264 | K | 247  |
| IPI00022275 | K | 456  |
| IPI00022276 | K | 133  |
| IPI00022305 | K | 117  |
| IPI00022314 | K | 68   |
| IPI00022314 | K | 130  |
| IPI00022314 | K | 132  |
| IPI00022348 | K | 487  |
| IPI00022348 | K | 515  |
| IPI00022373 | K | 343  |
| IPI00022421 | K | 69   |
| IPI00022442 | K | 92   |
| IPI00022443 | K | 413  |
| IPI00022449 | K | 67   |
| IPI00022449 | K | 304  |
| IPI00022449 | K | 738  |
| IPI00022449 | K | 1058 |
| IPI00022465 | K | 1721 |
| IPI00022498 | K | 51   |
| IPI00022542 | K | 647  |
| IPI00022542 | K | 718  |
| IPI00022542 | K | 719  |
| IPI00022597 | K | 3    |
| IPI00022613 | K | 772  |
| IPI00022630 | K | 11   |
| IPI00022648 | K | 55   |
| IPI00022744 | K | 158  |
| IPI00022744 | K | 574  |
| IPI00022744 | K | 824  |
| IPI00022774 | K | 8    |
| IPI00022774 | K | 18   |
| IPI00022774 | K | 60   |
| IPI00022774 | K | 81   |
| IPI00022774 | K | 164  |
| IPI00022774 | K | 251  |
| IPI00022774 | K | 315  |
| IPI00022774 | K | 336  |

Table S1

|             |   |      |
|-------------|---|------|
| IPI00022774 | K | 386  |
| IPI00022774 | K | 505  |
| IPI00022774 | K | 512  |
| IPI00022774 | K | 524  |
| IPI00022774 | K | 529  |
| IPI00022774 | K | 614  |
| IPI00022774 | K | 658  |
| IPI00022774 | K | 663  |
| IPI00022774 | K | 668  |
| IPI00022774 | K | 677  |
| IPI00022774 | K | 696  |
| IPI00022774 | K | 754  |
| IPI00022790 | K | 340  |
| IPI00022793 | K | 72   |
| IPI00022793 | K | 188  |
| IPI00022793 | K | 201  |
| IPI00022793 | K | 348  |
| IPI00022820 | K | 238  |
| IPI00022832 | K | 19   |
| IPI00022865 | K | 54   |
| IPI00022865 | K | 68   |
| IPI00022865 | K | 95   |
| IPI00022865 | K | 112  |
| IPI00022881 | K | 450  |
| IPI00022881 | K | 764  |
| IPI00022881 | K | 1449 |
| IPI00022891 | K | 92   |
| IPI00022891 | K | 96   |
| IPI00022891 | K | 272  |
| IPI00023006 | K | 63   |
| IPI00023006 | K | 70   |
| IPI00023084 | K | 456  |
| IPI00023087 | K | 191  |
| IPI00023161 | K | 230  |
| IPI00023161 | K | 265  |
| IPI00023234 | K | 253  |
| IPI00023234 | K | 271  |
| IPI00023234 | K | 324  |
| IPI00023234 | K | 617  |
| IPI00023339 | K | 1014 |
| IPI00023339 | K | 1203 |
| IPI00023339 | K | 1216 |
| IPI00023339 | K | 1535 |
| IPI00023339 | K | 1583 |
| IPI00023339 | K | 1586 |
| IPI00023339 | K | 1587 |
| IPI00023339 | K | 1588 |
| IPI00023339 | K | 1591 |
| IPI00023339 | K | 1592 |
| IPI00023339 | K | 1595 |
| IPI00023339 | K | 1597 |
| IPI00023339 | K | 1711 |



Table S1

|             |   |      |
|-------------|---|------|
| IPI00023339 | K | 1741 |
| IPI00023339 | K | 1744 |
| IPI00023339 | K | 1797 |
| IPI00023340 | K | 350  |
| IPI00023340 | K | 355  |
| IPI00023340 | K | 415  |
| IPI00023340 | K | 604  |
| IPI00023340 | K | 815  |
| IPI00023340 | K | 1007 |
| IPI00023340 | K | 1011 |
| IPI00023343 | K | 765  |
| IPI00023510 | K | 22   |
| IPI00023529 | K | 43   |
| IPI00023529 | K | 264  |
| IPI00023530 | K | 56   |
| IPI00023591 | K | 273  |
| IPI00023598 | K | 103  |
| IPI00023640 | K | 63   |
| IPI00023647 | K | 544  |
| IPI00023649 | K | 149  |
| IPI00023649 | K | 413  |
| IPI00023649 | K | 415  |
| IPI00023649 | K | 1222 |
| IPI00023756 | K | 378  |
| IPI00023860 | K | 116  |
| IPI00023860 | K | 194  |
| IPI00023860 | K | 197  |
| IPI00023860 | K | 264  |
| IPI00023860 | K | 266  |
| IPI00023860 | K | 271  |
| IPI00023919 | K | 222  |
| IPI00023972 | K | 448  |
| IPI00023972 | K | 451  |
| IPI00024067 | K | 450  |
| IPI00024067 | K | 506  |
| IPI00024067 | K | 507  |
| IPI00024067 | K | 637  |
| IPI00024067 | K | 764  |
| IPI00024067 | K | 856  |
| IPI00024067 | K | 1441 |
| IPI00024067 | K | 1449 |
| IPI00024067 | K | 1501 |
| IPI00024071 | K | 80   |
| IPI00024097 | K | 101  |
| IPI00024157 | K | 160  |
| IPI00024157 | K | 170  |
| IPI00024157 | K | 200  |
| IPI00024157 | K | 201  |
| IPI00024163 | K | 445  |
| IPI00024175 | K | 227  |
| IPI00024214 | K | 169  |
| IPI00024214 | K | 173  |

Table S1

|             |   |      |
|-------------|---|------|
| IPI00024214 | K | 447  |
| IPI00024214 | K | 488  |
| IPI00024279 | K | 1679 |
| IPI00024282 | K | 3    |
| IPI00024291 | K | 36   |
| IPI00024305 | K | 19   |
| IPI00024305 | K | 29   |
| IPI00024305 | K | 378  |
| IPI00024316 | K | 186  |
| IPI00024316 | K | 189  |
| IPI00024316 | K | 407  |
| IPI00024387 | K | 238  |
| IPI00024387 | K | 241  |
| IPI00024387 | K | 265  |
| IPI00024387 | K | 268  |
| IPI00024387 | K | 271  |
| IPI00024466 | K | 1034 |
| IPI00024547 | K | 203  |
| IPI00024568 | K | 1057 |
| IPI00024623 | K | 284  |
| IPI00024661 | K | 1087 |
| IPI00024662 | K | 40   |
| IPI00024662 | K | 55   |
| IPI00024662 | K | 91   |
| IPI00024662 | K | 106  |
| IPI00024662 | K | 143  |
| IPI00024664 | K | 184  |
| IPI00024670 | K | 162  |
| IPI00024670 | K | 164  |
| IPI00024672 | K | 308  |
| IPI00024787 | K | 291  |
| IPI00024787 | K | 325  |
| IPI00024871 | K | 11   |
| IPI00024884 | K | 261  |
| IPI00024913 | K | 164  |
| IPI00024913 | K | 219  |
| IPI00024915 | K | 83   |
| IPI00024915 | K | 116  |
| IPI00024919 | K | 91   |
| IPI00024919 | K | 93   |
| IPI00024933 | K | 40   |
| IPI00024933 | K | 54   |
| IPI00024933 | K | 83   |
| IPI00024971 | K | 103  |
| IPI00024975 | K | 797  |
| IPI00024975 | K | 1009 |
| IPI00024990 | K | 55   |
| IPI00024990 | K | 117  |
| IPI00024990 | K | 331  |
| IPI00024993 | K | 101  |
| IPI00024993 | K | 118  |
| IPI00025019 | K | 204  |

Table S1

|             |   |     |
|-------------|---|-----|
| IPI00025039 | K | 205 |
| IPI00025084 | K | 179 |
| IPI00025087 | K | 120 |
| IPI00025087 | K | 164 |
| IPI00025087 | K | 292 |
| IPI00025087 | K | 305 |
| IPI00025087 | K | 319 |
| IPI00025087 | K | 320 |
| IPI00025087 | K | 321 |
| IPI00025087 | K | 370 |
| IPI00025087 | K | 372 |
| IPI00025087 | K | 373 |
| IPI00025087 | K | 381 |
| IPI00025087 | K | 382 |
| IPI00025087 | K | 386 |
| IPI00025091 | K | 38  |
| IPI00025091 | K | 45  |
| IPI00025091 | K | 48  |
| IPI00025158 | K | 621 |
| IPI00025176 | K | 219 |
| IPI00025252 | K | 94  |
| IPI00025252 | K | 104 |
| IPI00025252 | K | 362 |
| IPI00025273 | K | 350 |
| IPI00025307 | K | 123 |
| IPI00025307 | K | 283 |
| IPI00025307 | K | 496 |
| IPI00025329 | K | 80  |
| IPI00025329 | K | 180 |
| IPI00025341 | K | 132 |
| IPI00025341 | K | 275 |
| IPI00025346 | K | 34  |
| IPI00025366 | K | 327 |
| IPI00025366 | K | 366 |
| IPI00025366 | K | 375 |
| IPI00025366 | K | 382 |
| IPI00025366 | K | 393 |
| IPI00025366 | K | 459 |
| IPI00025416 | K | 62  |
| IPI00025416 | K | 327 |
| IPI00025491 | K | 54  |
| IPI00025491 | K | 118 |
| IPI00025491 | K | 174 |
| IPI00025491 | K | 291 |
| IPI00025491 | K | 309 |
| IPI00025512 | K | 123 |
| IPI00025546 | K | 227 |
| IPI00025710 | K | 283 |
| IPI00025753 | K | 450 |
| IPI00025807 | K | 551 |
| IPI00025849 | K | 101 |
| IPI00025874 | K | 226 |

Table S1

|             |   |      |
|-------------|---|------|
| IPI00025974 | K | 6    |
| IPI00025974 | K | 114  |
| IPI00025974 | K | 117  |
| IPI00026087 | K | 64   |
| IPI00026089 | K | 141  |
| IPI00026089 | K | 333  |
| IPI00026089 | K | 554  |
| IPI00026089 | K | 562  |
| IPI00026089 | K | 1067 |
| IPI00026105 | K | 132  |
| IPI00026105 | K | 142  |
| IPI00026105 | K | 173  |
| IPI00026105 | K | 183  |
| IPI00026105 | K | 282  |
| IPI00026105 | K | 341  |
| IPI00026105 | K | 438  |
| IPI00026105 | K | 453  |
| IPI00026105 | K | 454  |
| IPI00026105 | K | 470  |
| IPI00026156 | K | 41   |
| IPI00026156 | K | 123  |
| IPI00026156 | K | 192  |
| IPI00026156 | K | 241  |
| IPI00026182 | K | 86   |
| IPI00026182 | K | 97   |
| IPI00026182 | K | 273  |
| IPI00026185 | K | 235  |
| IPI00026202 | K | 76   |
| IPI00026215 | K | 80   |
| IPI00026215 | K | 109  |
| IPI00026215 | K | 200  |
| IPI00026215 | K | 267  |
| IPI00026215 | K | 354  |
| IPI00026215 | K | 375  |
| IPI00026215 | K | 377  |
| IPI00026215 | K | 380  |
| IPI00026216 | K | 48   |
| IPI00026219 | K | 809  |
| IPI00026230 | K | 167  |
| IPI00026272 | K | 6    |
| IPI00026272 | K | 96   |
| IPI00026302 | K | 75   |
| IPI00026309 | K | 27   |
| IPI00026314 | K | 61   |
| IPI00026314 | K | 648  |
| IPI00026337 | K | 21   |
| IPI00026337 | K | 23   |
| IPI00026358 | K | 24   |
| IPI00026516 | K | 173  |
| IPI00026519 | K | 73   |
| IPI00026519 | K | 167  |
| IPI00026559 | K | 199  |

Table S1

|             |   |      |
|-------------|---|------|
| IPI00026665 | K | 327  |
| IPI00026665 | K | 638  |
| IPI00026689 | K | 6    |
| IPI00026689 | K | 33   |
| IPI00026689 | K | 34   |
| IPI00026781 | K | 70   |
| IPI00026781 | K | 213  |
| IPI00026781 | K | 235  |
| IPI00026781 | K | 298  |
| IPI00026781 | K | 436  |
| IPI00026781 | K | 528  |
| IPI00026781 | K | 673  |
| IPI00026781 | K | 786  |
| IPI00026781 | K | 1239 |
| IPI00026781 | K | 1704 |
| IPI00026781 | K | 1752 |
| IPI00026781 | K | 1771 |
| IPI00026781 | K | 1847 |
| IPI00026781 | K | 1878 |
| IPI00026781 | K | 1995 |
| IPI00026848 | K | 287  |
| IPI00026928 | K | 106  |
| IPI00026940 | K | 59   |
| IPI00026940 | K | 83   |
| IPI00026940 | K | 275  |
| IPI00026940 | K | 276  |
| IPI00026952 | K | 752  |
| IPI00026970 | K | 139  |
| IPI00026970 | K | 141  |
| IPI00026970 | K | 196  |
| IPI00026970 | K | 223  |
| IPI00026970 | K | 335  |
| IPI00026970 | K | 337  |
| IPI00026970 | K | 513  |
| IPI00026970 | K | 732  |
| IPI00026970 | K | 786  |
| IPI00026970 | K | 904  |
| IPI00026970 | K | 907  |
| IPI00027009 | K | 117  |
| IPI00027032 | K | 190  |
| IPI00027107 | K | 82   |
| IPI00027107 | K | 91   |
| IPI00027107 | K | 259  |
| IPI00027107 | K | 421  |
| IPI00027146 | K | 415  |
| IPI00027146 | K | 457  |
| IPI00027146 | K | 527  |
| IPI00027146 | K | 545  |
| IPI00027165 | K | 348  |
| IPI00027223 | K | 81   |
| IPI00027223 | K | 224  |
| IPI00027223 | K | 321  |

Table S1

|             |   |      |
|-------------|---|------|
| IPI00027228 | K | 181  |
| IPI00027230 | K | 75   |
| IPI00027230 | K | 613  |
| IPI00027230 | K | 682  |
| IPI00027232 | K | 1088 |
| IPI00027252 | K | 250  |
| IPI00027269 | K | 197  |
| IPI00027270 | K | 77   |
| IPI00027280 | K | 365  |
| IPI00027280 | K | 367  |
| IPI00027280 | K | 373  |
| IPI00027280 | K | 992  |
| IPI00027415 | K | 845  |
| IPI00027415 | K | 853  |
| IPI00027415 | K | 947  |
| IPI00027442 | K | 19   |
| IPI00027442 | K | 876  |
| IPI00027443 | K | 586  |
| IPI00027444 | K | 137  |
| IPI00027444 | K | 177  |
| IPI00027445 | K | 419  |
| IPI00027445 | K | 444  |
| IPI00027448 | K | 24   |
| IPI00027448 | K | 54   |
| IPI00027448 | K | 66   |
| IPI00027451 | K | 365  |
| IPI00027451 | K | 371  |
| IPI00027463 | K | 40   |
| IPI00027497 | K | 12   |
| IPI00027497 | K | 142  |
| IPI00027497 | K | 211  |
| IPI00027497 | K | 252  |
| IPI00027497 | K | 466  |
| IPI00027547 | K | 68   |
| IPI00027547 | K | 85   |
| IPI00027569 | K | 39   |
| IPI00027626 | K | 5    |
| IPI00027626 | K | 10   |
| IPI00027626 | K | 199  |
| IPI00027626 | K | 365  |
| IPI00027626 | K | 377  |
| IPI00027626 | K | 388  |
| IPI00027681 | K | 39   |
| IPI00027681 | K | 43   |
| IPI00027729 | K | 242  |
| IPI00027776 | K | 415  |
| IPI00027834 | K | 59   |
| IPI00027834 | K | 269  |
| IPI00027834 | K | 475  |
| IPI00027834 | K | 552  |
| IPI00027970 | K | 55   |
| IPI00027987 | K | 53   |

Table S1

|             |   |     |
|-------------|---|-----|
| IPI00027987 | K | 64  |
| IPI00027987 | K | 67  |
| IPI00027988 | K | 18  |
| IPI00027988 | K | 20  |
| IPI00027996 | K | 472 |
| IPI00028004 | K | 77  |
| IPI00028006 | K | 68  |
| IPI00028006 | K | 185 |
| IPI00028031 | K | 285 |
| IPI00028031 | K | 377 |
| IPI00028051 | K | 761 |
| IPI00028051 | K | 762 |
| IPI00028091 | K | 240 |
| IPI00028091 | K | 244 |
| IPI00028091 | K | 251 |
| IPI00028091 | K | 254 |
| IPI00028109 | K | 35  |
| IPI00028127 | K | 2   |
| IPI00028127 | K | 8   |
| IPI00028127 | K | 15  |
| IPI00028127 | K | 18  |
| IPI00028127 | K | 305 |
| IPI00028160 | K | 87  |
| IPI00028277 | K | 216 |
| IPI00028414 | K | 35  |
| IPI00028414 | K | 119 |
| IPI00028520 | K | 81  |
| IPI00028520 | K | 104 |
| IPI00028520 | K | 375 |
| IPI00028635 | K | 460 |
| IPI00028888 | K | 165 |
| IPI00028888 | K | 197 |
| IPI00028888 | K | 251 |
| IPI00028888 | K | 341 |
| IPI00028888 | K | 353 |
| IPI00028912 | K | 362 |
| IPI00028957 | K | 393 |
| IPI00029012 | K | 68  |
| IPI00029073 | K | 65  |
| IPI00029073 | K | 69  |
| IPI00029073 | K | 76  |
| IPI00029073 | K | 77  |
| IPI00029079 | K | 9   |
| IPI00029079 | K | 416 |
| IPI00029081 | K | 316 |
| IPI00029095 | K | 3   |
| IPI00029133 | K | 115 |
| IPI00029133 | K | 131 |
| IPI00029133 | K | 162 |
| IPI00029133 | K | 221 |
| IPI00029133 | K | 233 |
| IPI00029133 | K | 238 |

Table S1

|             |   |     |
|-------------|---|-----|
| IPI00029196 | K | 384 |
| IPI00029250 | K | 113 |
| IPI00029400 | K | 54  |
| IPI00029444 | K | 267 |
| IPI00029447 | K | 124 |
| IPI00029447 | K | 126 |
| IPI00029484 | K | 439 |
| IPI00029484 | K | 645 |
| IPI00029485 | K | 230 |
| IPI00029534 | K | 81  |
| IPI00029557 | K | 157 |
| IPI00029557 | K | 215 |
| IPI00029558 | K | 114 |
| IPI00029561 | K | 181 |
| IPI00029561 | K | 242 |
| IPI00029561 | K | 243 |
| IPI00029561 | K | 350 |
| IPI00029601 | K | 87  |
| IPI00029601 | K | 124 |
| IPI00029601 | K | 144 |
| IPI00029601 | K | 161 |
| IPI00029601 | K | 198 |
| IPI00029601 | K | 203 |
| IPI00029601 | K | 218 |
| IPI00029601 | K | 235 |
| IPI00029601 | K | 272 |
| IPI00029601 | K | 304 |
| IPI00029601 | K | 309 |
| IPI00029601 | K | 319 |
| IPI00029623 | K | 102 |
| IPI00029623 | K | 104 |
| IPI00029623 | K | 181 |
| IPI00029629 | K | 273 |
| IPI00029629 | K | 320 |
| IPI00029629 | K | 567 |
| IPI00029631 | K | 12  |
| IPI00029697 | K | 297 |
| IPI00029705 | K | 827 |
| IPI00029731 | K | 8   |
| IPI00029733 | K | 246 |
| IPI00029737 | K | 89  |
| IPI00029737 | K | 92  |
| IPI00029741 | K | 206 |
| IPI00029744 | K | 103 |
| IPI00029744 | K | 104 |
| IPI00029744 | K | 113 |
| IPI00029745 | K | 276 |
| IPI00029750 | K | 37  |
| IPI00029764 | K | 92  |
| IPI00029764 | K | 219 |
| IPI00029764 | K | 489 |
| IPI00029772 | K | 384 |



Table S1

|             |   |      |
|-------------|---|------|
| IPI00029795 | K | 280  |
| IPI00029997 | K | 180  |
| IPI00030090 | K | 449  |
| IPI00030131 | K | 207  |
| IPI00030179 | K | 29   |
| IPI00030179 | K | 31   |
| IPI00030179 | K | 124  |
| IPI00030179 | K | 161  |
| IPI00030247 | K | 390  |
| IPI00030247 | K | 492  |
| IPI00030274 | K | 499  |
| IPI00030275 | K | 87   |
| IPI00030275 | K | 332  |
| IPI00030275 | K | 382  |
| IPI00030275 | K | 424  |
| IPI00030275 | K | 431  |
| IPI00030275 | K | 432  |
| IPI00030275 | K | 466  |
| IPI00030320 | K | 73   |
| IPI00030363 | K | 83   |
| IPI00030363 | K | 124  |
| IPI00030363 | K | 174  |
| IPI00030363 | K | 181  |
| IPI00030363 | K | 190  |
| IPI00030363 | K | 202  |
| IPI00030363 | K | 230  |
| IPI00030363 | K | 251  |
| IPI00030363 | K | 263  |
| IPI00030363 | K | 338  |
| IPI00030702 | K | 343  |
| IPI00030706 | K | 3    |
| IPI00030706 | K | 212  |
| IPI00030770 | K | 264  |
| IPI00030781 | K | 410  |
| IPI00030781 | K | 413  |
| IPI00030820 | K | 144  |
| IPI00030915 | K | 601  |
| IPI00031023 | K | 21   |
| IPI00031410 | K | 1218 |
| IPI00031420 | K | 107  |
| IPI00031420 | K | 173  |
| IPI00031420 | K | 434  |
| IPI00031489 | K | 58   |
| IPI00031489 | K | 61   |
| IPI00031517 | K | 599  |
| IPI00031517 | K | 643  |
| IPI00031517 | K | 646  |
| IPI00031517 | K | 775  |
| IPI00031519 | K | 235  |
| IPI00031519 | K | 239  |
| IPI00031519 | K | 1173 |
| IPI00031519 | K | 1175 |

Table S1

|             |   |      |
|-------------|---|------|
| IPI00031519 | K | 1177 |
| IPI00031519 | K | 1179 |
| IPI00031519 | K | 1181 |
| IPI00031519 | K | 1183 |
| IPI00031521 | K | 20   |
| IPI00031522 | K | 129  |
| IPI00031522 | K | 132  |
| IPI00031522 | K | 295  |
| IPI00031522 | K | 303  |
| IPI00031522 | K | 309  |
| IPI00031522 | K | 326  |
| IPI00031522 | K | 350  |
| IPI00031522 | K | 353  |
| IPI00031522 | K | 359  |
| IPI00031522 | K | 406  |
| IPI00031522 | K | 460  |
| IPI00031522 | K | 505  |
| IPI00031522 | K | 540  |
| IPI00031522 | K | 569  |
| IPI00031522 | K | 570  |
| IPI00031522 | K | 644  |
| IPI00031522 | K | 728  |
| IPI00031526 | K | 118  |
| IPI00031526 | K | 146  |
| IPI00031545 | K | 608  |
| IPI00031556 | K | 462  |
| IPI00031562 | K | 6    |
| IPI00031562 | K | 10   |
| IPI00031562 | K | 96   |
| IPI00031563 | K | 65   |
| IPI00031570 | K | 21   |
| IPI00031570 | K | 165  |
| IPI00031583 | K | 206  |
| IPI00031627 | K | 710  |
| IPI00031681 | K | 6    |
| IPI00031691 | K | 121  |
| IPI00031801 | K | 96   |
| IPI00031812 | K | 64   |
| IPI00031812 | K | 81   |
| IPI00031820 | K | 311  |
| IPI00031820 | K | 349  |
| IPI00032103 | K | 385  |
| IPI00032164 | K | 69   |
| IPI00032214 | K | 368  |
| IPI00032214 | K | 418  |
| IPI00032214 | K | 516  |
| IPI00032214 | K | 519  |
| IPI00032214 | K | 523  |
| IPI00032214 | K | 903  |
| IPI00032230 | K | 405  |
| IPI00032313 | K | 7    |
| IPI00032313 | K | 18   |

Table S1

|             |   |      |
|-------------|---|------|
| IPI00032313 | K | 22   |
| IPI00032313 | K | 35   |
| IPI00032316 | K | 528  |
| IPI00032355 | K | 830  |
| IPI00032358 | K | 714  |
| IPI00032358 | K | 717  |
| IPI00032401 | K | 89   |
| IPI00032423 | K | 15   |
| IPI00032561 | K | 297  |
| IPI00032598 | K | 388  |
| IPI00032826 | K | 153  |
| IPI00032827 | K | 29   |
| IPI00032827 | K | 41   |
| IPI00032831 | K | 124  |
| IPI00032849 | K | 90   |
| IPI00032875 | K | 96   |
| IPI00032875 | K | 153  |
| IPI00032875 | K | 223  |
| IPI00032875 | K | 344  |
| IPI00032881 | K | 102  |
| IPI00032892 | K | 25   |
| IPI00032904 | K | 6    |
| IPI00032904 | K | 12   |
| IPI00032955 | K | 102  |
| IPI00032955 | K | 112  |
| IPI00032957 | K | 65   |
| IPI00033016 | K | 158  |
| IPI00033016 | K | 163  |
| IPI00033016 | K | 172  |
| IPI00033016 | K | 290  |
| IPI00033016 | K | 332  |
| IPI00033016 | K | 338  |
| IPI00033016 | K | 386  |
| IPI00033022 | K | 598  |
| IPI00033030 | K | 21   |
| IPI00033036 | K | 427  |
| IPI00033054 | K | 26   |
| IPI00033054 | K | 57   |
| IPI00033217 | K | 707  |
| IPI00033486 | K | 288  |
| IPI00033487 | K | 11   |
| IPI00033561 | K | 218  |
| IPI00033561 | K | 221  |
| IPI00034308 | K | 884  |
| IPI00036578 | K | 1014 |
| IPI00036742 | K | 166  |
| IPI00043429 | K | 165  |
| IPI00044461 | K | 183  |
| IPI00044587 | K | 226  |
| IPI00044666 | K | 376  |
| IPI00044761 | K | 131  |
| IPI00045109 | K | 6    |

Table S1

|             |   |      |
|-------------|---|------|
| IPI00045550 | K | 774  |
| IPI00045914 | K | 1050 |
| IPI00045914 | K | 1998 |
| IPI00045914 | K | 1999 |
| IPI00045914 | K | 2001 |
| IPI00045914 | K | 2005 |
| IPI00045922 | K | 373  |
| IPI00045946 | K | 237  |
| IPI00046828 | K | 83   |
| IPI00046828 | K | 100  |
| IPI00056505 | K | 248  |
| IPI00059242 | K | 70   |
| IPI00059242 | K | 191  |
| IPI00059279 | K | 9    |
| IPI00059292 | K | 116  |
| IPI00060181 | K | 233  |
| IPI00060473 | K | 484  |
| IPI00061009 | K | 403  |
| IPI00061009 | K | 413  |
| IPI00061206 | K | 111  |
| IPI00061525 | K | 152  |
| IPI00061651 | K | 29   |
| IPI00061680 | K | 288  |
| IPI00061680 | K | 291  |
| IPI00062037 | K | 5    |
| IPI00063106 | K | 3    |
| IPI00063106 | K | 6    |
| IPI00063106 | K | 11   |
| IPI00063130 | K | 149  |
| IPI00063302 | K | 189  |
| IPI00063302 | K | 191  |
| IPI00063404 | K | 474  |
| IPI00063404 | K | 475  |
| IPI00063635 | K | 292  |
| IPI00063635 | K | 572  |
| IPI00063673 | K | 127  |
| IPI00063903 | K | 16   |
| IPI00063903 | K | 17   |
| IPI00064162 | K | 408  |
| IPI00064202 | K | 599  |
| IPI00064212 | K | 490  |
| IPI00064212 | K | 617  |
| IPI00064457 | K | 928  |
| IPI00064765 | K | 208  |
| IPI00064767 | K | 295  |
| IPI00065500 | K | 283  |
| IPI00068506 | K | 304  |
| IPI00069084 | K | 2543 |
| IPI00069084 | K | 3078 |
| IPI00069750 | K | 251  |
| IPI00069750 | K | 454  |
| IPI00069817 | K | 416  |

Table S1

|             |   |      |
|-------------|---|------|
| IPI00069817 | K | 426  |
| IPI00069817 | K | 1335 |
| IPI00070943 | K | 930  |
| IPI00071483 | K | 432  |
| IPI00072377 | K | 83   |
| IPI00072377 | K | 132  |
| IPI00072377 | K | 150  |
| IPI00072377 | K | 172  |
| IPI00072534 | K | 70   |
| IPI00072534 | K | 483  |
| IPI00072534 | K | 487  |
| IPI00074876 | K | 843  |
| IPI00074893 | K | 834  |
| IPI00074893 | K | 835  |
| IPI00074893 | K | 836  |
| IPI00074893 | K | 843  |
| IPI00075248 | K | 14   |
| IPI00075248 | K | 22   |
| IPI00075248 | K | 76   |
| IPI00075248 | K | 116  |
| IPI00075248 | K | 149  |
| IPI00081097 | K | 163  |
| IPI00081836 | K | 6    |
| IPI00083708 | K | 27   |
| IPI00083708 | K | 49   |
| IPI00083708 | K | 394  |
| IPI00084571 | K | 126  |
| IPI00084571 | K | 204  |
| IPI00084571 | K | 234  |
| IPI00084571 | K | 236  |
| IPI00093057 | K | 371  |
| IPI00093057 | K | 404  |
| IPI00093253 | K | 343  |
| IPI00096066 | K | 73   |
| IPI00096066 | K | 227  |
| IPI00096066 | K | 291  |
| IPI00096066 | K | 338  |
| IPI00097532 | K | 176  |
| IPI00098902 | K | 970  |
| IPI00099179 | K | 303  |
| IPI00099433 | K | 440  |
| IPI00099433 | K | 584  |
| IPI00099433 | K | 590  |
| IPI00099433 | K | 1038 |
| IPI00099433 | K | 1042 |
| IPI00099433 | K | 1044 |
| IPI00099463 | K | 353  |
| IPI00099810 | K | 144  |
| IPI00099834 | K | 222  |
| IPI00099834 | K | 261  |
| IPI00100151 | K | 796  |
| IPI00100160 | K | 55   |

Table S1

|             |   |      |
|-------------|---|------|
| IPI00100160 | K | 971  |
| IPI00100160 | K | 1168 |
| IPI00100460 | K | 235  |
| IPI00100460 | K | 382  |
| IPI00100460 | K | 627  |
| IPI00100630 | K | 252  |
| IPI00100630 | K | 333  |
| IPI00100656 | K | 22   |
| IPI00100656 | K | 116  |
| IPI00100731 | K | 69   |
| IPI00100980 | K | 324  |
| IPI00101664 | K | 353  |
| IPI00101968 | K | 176  |
| IPI00101968 | K | 297  |
| IPI00102069 | K | 213  |
| IPI00102069 | K | 254  |
| IPI00102165 | K | 6    |
| IPI00102165 | K | 96   |
| IPI00102339 | K | 58   |
| IPI00102339 | K | 99   |
| IPI00102339 | K | 102  |
| IPI00102339 | K | 104  |
| IPI00102580 | K | 219  |
| IPI00102580 | K | 229  |
| IPI00102661 | K | 305  |
| IPI00102752 | K | 450  |
| IPI00102804 | K | 229  |
| IPI00102804 | K | 230  |
| IPI00102804 | K | 234  |
| IPI00102815 | K | 23   |
| IPI00102815 | K | 34   |
| IPI00102815 | K | 40   |
| IPI00103023 | K | 298  |
| IPI00103142 | K | 157  |
| IPI00103415 | K | 701  |
| IPI00103467 | K | 364  |
| IPI00103483 | K | 519  |
| IPI00103525 | K | 206  |
| IPI00103599 | K | 229  |
| IPI00103654 | K | 252  |
| IPI00103867 | K | 105  |
| IPI00104050 | K | 221  |
| IPI00104050 | K | 401  |
| IPI00104050 | K | 420  |
| IPI00104050 | K | 421  |
| IPI00104050 | K | 455  |
| IPI00104050 | K | 519  |
| IPI00104050 | K | 709  |
| IPI00104050 | K | 811  |
| IPI00104341 | K | 43   |
| IPI00104907 | K | 113  |
| IPI00105407 | K | 27   |

Table S1

|             |   |      |
|-------------|---|------|
| IPI00105407 | K | 69   |
| IPI00105407 | K | 95   |
| IPI00105407 | K | 98   |
| IPI00105407 | K | 125  |
| IPI00105407 | K | 179  |
| IPI00105407 | K | 263  |
| IPI00105598 | K | 418  |
| IPI00106567 | K | 46   |
| IPI00107366 | K | 58   |
| IPI00107722 | K | 114  |
| IPI00107745 | K | 78   |
| IPI00107745 | K | 166  |
| IPI00107745 | K | 231  |
| IPI00107745 | K | 233  |
| IPI00107752 | K | 265  |
| IPI00107752 | K | 809  |
| IPI00107753 | K | 283  |
| IPI00140420 | K | 193  |
| IPI00140420 | K | 339  |
| IPI00140420 | K | 641  |
| IPI00140420 | K | 752  |
| IPI00143753 | K | 98   |
| IPI00143753 | K | 105  |
| IPI00143753 | K | 106  |
| IPI00143753 | K | 760  |
| IPI00146935 | K | 283  |
| IPI00147874 | K | 79   |
| IPI00147874 | K | 290  |
| IPI00147874 | K | 293  |
| IPI00149276 | K | 270  |
| IPI00149849 | K | 447  |
| IPI00150269 | K | 27   |
| IPI00151977 | K | 611  |
| IPI00152182 | K | 9    |
| IPI00152182 | K | 10   |
| IPI00152216 | K | 202  |
| IPI00152535 | K | 100  |
| IPI00152535 | K | 102  |
| IPI00152535 | K | 106  |
| IPI00152535 | K | 107  |
| IPI00152535 | K | 174  |
| IPI00152535 | K | 175  |
| IPI00152535 | K | 858  |
| IPI00152542 | K | 1049 |
| IPI00152653 | K | 310  |
| IPI00152653 | K | 320  |
| IPI00152653 | K | 322  |
| IPI00152688 | K | 419  |
| IPI00152692 | K | 65   |
| IPI00152695 | K | 98   |
| IPI00152695 | K | 181  |
| IPI00152785 | K | 12   |

Table S1

|             |   |      |
|-------------|---|------|
| IPI00152785 | K | 13   |
| IPI00152785 | K | 16   |
| IPI00152785 | K | 17   |
| IPI00152785 | K | 21   |
| IPI00152785 | K | 24   |
| IPI00152785 | K | 109  |
| IPI00152906 | K | 6    |
| IPI00152906 | K | 12   |
| IPI00152906 | K | 13   |
| IPI00152906 | K | 16   |
| IPI00152906 | K | 21   |
| IPI00152906 | K | 24   |
| IPI00152906 | K | 109  |
| IPI00152906 | K | 117  |
| IPI00152906 | K | 121  |
| IPI00152981 | K | 41   |
| IPI00152981 | K | 608  |
| IPI00154451 | K | 517  |
| IPI00154915 | K | 1005 |
| IPI00154915 | K | 1007 |
| IPI00155601 | K | 103  |
| IPI00156649 | K | 477  |
| IPI00157734 | K | 39   |
| IPI00159322 | K | 1267 |
| IPI00160622 | K | 1048 |
| IPI00162330 | K | 127  |
| IPI00162563 | K | 20   |
| IPI00163084 | K | 420  |
| IPI00163496 | K | 801  |
| IPI00163496 | K | 804  |
| IPI00163505 | K | 103  |
| IPI00163851 | K | 1259 |
| IPI00164352 | K | 1117 |
| IPI00165092 | K | 355  |
| IPI00165189 | K | 290  |
| IPI00165230 | K | 103  |
| IPI00165931 | K | 1350 |
| IPI00166055 | K | 21   |
| IPI00166153 | K | 108  |
| IPI00166293 | K | 6    |
| IPI00166293 | K | 12   |
| IPI00166293 | K | 13   |
| IPI00166395 | K | 439  |
| IPI00166500 | K | 114  |
| IPI00166500 | K | 125  |
| IPI00166528 | K | 582  |
| IPI00166555 | K | 511  |
| IPI00166704 | K | 46   |
| IPI00166704 | K | 47   |
| IPI00166708 | K | 73   |
| IPI00166749 | K | 299  |
| IPI00166865 | K | 131  |



Table S1

|             |   |      |
|-------------|---|------|
| IPI00167196 | K | 54   |
| IPI00167419 | K | 171  |
| IPI00167535 | K | 346  |
| IPI00167535 | K | 1472 |
| IPI00167535 | K | 1553 |
| IPI00167535 | K | 1634 |
| IPI00167535 | K | 2349 |
| IPI00167535 | K | 2356 |
| IPI00167904 | K | 103  |
| IPI00167904 | K | 111  |
| IPI00167941 | K | 1683 |
| IPI00168378 | K | 194  |
| IPI00168388 | K | 452  |
| IPI00168603 | K | 496  |
| IPI00168839 | K | 153  |
| IPI00168899 | K | 135  |
| IPI00169267 | K | 314  |
| IPI00169267 | K | 321  |
| IPI00169383 | K | 11   |
| IPI00169383 | K | 30   |
| IPI00169383 | K | 48   |
| IPI00169383 | K | 75   |
| IPI00169383 | K | 86   |
| IPI00169383 | K | 91   |
| IPI00169383 | K | 97   |
| IPI00169383 | K | 131  |
| IPI00169383 | K | 146  |
| IPI00169383 | K | 156  |
| IPI00169383 | K | 199  |
| IPI00169383 | K | 267  |
| IPI00169383 | K | 291  |
| IPI00169383 | K | 322  |
| IPI00169383 | K | 323  |
| IPI00169383 | K | 406  |
| IPI00170596 | K | 469  |
| IPI00170596 | K | 723  |
| IPI00170596 | K | 727  |
| IPI00170596 | K | 875  |
| IPI00170596 | K | 934  |
| IPI00170786 | K | 13   |
| IPI00170867 | K | 512  |
| IPI00171127 | K | 126  |
| IPI00171390 | K | 23   |
| IPI00171445 | K | 114  |
| IPI00171573 | K | 332  |
| IPI00171611 | K | 10   |
| IPI00171611 | K | 15   |
| IPI00171611 | K | 19   |
| IPI00171611 | K | 24   |
| IPI00171611 | K | 57   |
| IPI00171611 | K | 80   |
| IPI00171692 | K | 87   |

Table S1

|             |   |      |
|-------------|---|------|
| IPI00171779 | K | 260  |
| IPI00171779 | K | 262  |
| IPI00171798 | K | 152  |
| IPI00171821 | K | 391  |
| IPI00171844 | K | 25   |
| IPI00171903 | K | 239  |
| IPI00171903 | K | 277  |
| IPI00171903 | K | 698  |
| IPI00172487 | K | 101  |
| IPI00172656 | K | 167  |
| IPI00173359 | K | 562  |
| IPI00174345 | K | 156  |
| IPI00174345 | K | 159  |
| IPI00174775 | K | 142  |
| IPI00175151 | K | 53   |
| IPI00176157 | K | 538  |
| IPI00176706 | K | 21   |
| IPI00176903 | K | 109  |
| IPI00177437 | K | 381  |
| IPI00177728 | K | 9    |
| IPI00177888 | K | 363  |
| IPI00177888 | K | 474  |
| IPI00177965 | K | 171  |
| IPI00178150 | K | 868  |
| IPI00178366 | K | 961  |
| IPI00178366 | K | 963  |
| IPI00178431 | K | 193  |
| IPI00178431 | K | 206  |
| IPI00178431 | K | 514  |
| IPI00178431 | K | 522  |
| IPI00178440 | K | 7    |
| IPI00178440 | K | 60   |
| IPI00178440 | K | 185  |
| IPI00178512 | K | 792  |
| IPI00178611 | K | 191  |
| IPI00178611 | K | 304  |
| IPI00178744 | K | 95   |
| IPI00178744 | K | 263  |
| IPI00178744 | K | 300  |
| IPI00178744 | K | 355  |
| IPI00178744 | K | 506  |
| IPI00178750 | K | 134  |
| IPI00178750 | K | 135  |
| IPI00178750 | K | 139  |
| IPI00178750 | K | 144  |
| IPI00178750 | K | 146  |
| IPI00179026 | K | 51   |
| IPI00179298 | K | 509  |
| IPI00179298 | K | 1840 |
| IPI00179298 | K | 2248 |
| IPI00179330 | K | 6    |
| IPI00179330 | K | 11   |

Table S1

|             |   |      |
|-------------|---|------|
| IPI00179330 | K | 48   |
| IPI00179330 | K | 104  |
| IPI00179330 | K | 107  |
| IPI00179330 | K | 113  |
| IPI00179330 | K | 152  |
| IPI00179709 | K | 40   |
| IPI00179709 | K | 163  |
| IPI00179709 | K | 280  |
| IPI00179709 | K | 394  |
| IPI00179709 | K | 401  |
| IPI00179851 | K | 123  |
| IPI00180240 | K | 4    |
| IPI00180240 | K | 32   |
| IPI00180240 | K | 39   |
| IPI00180675 | K | 40   |
| IPI00180675 | K | 164  |
| IPI00180675 | K | 326  |
| IPI00180675 | K | 401  |
| IPI00180764 | K | 171  |
| IPI00180764 | K | 199  |
| IPI00181702 | K | 49   |
| IPI00181728 | K | 276  |
| IPI00182116 | K | 118  |
| IPI00182289 | K | 48   |
| IPI00182304 | K | 396  |
| IPI00182533 | K | 101  |
| IPI00182632 | K | 274  |
| IPI00182728 | K | 432  |
| IPI00182728 | K | 434  |
| IPI00182757 | K | 215  |
| IPI00182757 | K | 287  |
| IPI00183208 | K | 194  |
| IPI00183208 | K | 197  |
| IPI00183500 | K | 151  |
| IPI00183530 | K | 237  |
| IPI00183626 | K | 259  |
| IPI00183626 | K | 266  |
| IPI00183626 | K | 515  |
| IPI00183626 | K | 554  |
| IPI00183695 | K | 23   |
| IPI00183695 | K | 28   |
| IPI00183695 | K | 37   |
| IPI00183695 | K | 54   |
| IPI00183695 | K | 57   |
| IPI00183968 | K | 13   |
| IPI00183968 | K | 119  |
| IPI00184284 | K | 54   |
| IPI00184330 | K | 216  |
| IPI00184330 | K | 896  |
| IPI00184533 | K | 245  |
| IPI00185027 | K | 1158 |
| IPI00185361 | K | 444  |

Table S1

|             |   |     |
|-------------|---|-----|
| IPI00185361 | K | 517 |
| IPI00185361 | K | 519 |
| IPI00185361 | K | 523 |
| IPI00185374 | K | 221 |
| IPI00185374 | K | 368 |
| IPI00185374 | K | 448 |
| IPI00186224 | K | 141 |
| IPI00186224 | K | 144 |
| IPI00186290 | K | 235 |
| IPI00186290 | K | 239 |
| IPI00186290 | K | 272 |
| IPI00186290 | K | 275 |
| IPI00186290 | K | 308 |
| IPI00186290 | K | 318 |
| IPI00186290 | K | 426 |
| IPI00186290 | K | 445 |
| IPI00186290 | K | 857 |
| IPI00215611 | K | 9   |
| IPI00215611 | K | 22  |
| IPI00215637 | K | 118 |
| IPI00215637 | K | 130 |
| IPI00215719 | K | 154 |
| IPI00215780 | K | 23  |
| IPI00215780 | K | 77  |
| IPI00215780 | K | 111 |
| IPI00215790 | K | 9   |
| IPI00215790 | K | 67  |
| IPI00215790 | K | 70  |
| IPI00215878 | K | 21  |
| IPI00215893 | K | 39  |
| IPI00215901 | K | 14  |
| IPI00215901 | K | 93  |
| IPI00215911 | K | 3   |
| IPI00215911 | K | 6   |
| IPI00215911 | K | 197 |
| IPI00215914 | K | 36  |
| IPI00215963 | K | 496 |
| IPI00215963 | K | 739 |
| IPI00215965 | K | 3   |
| IPI00215965 | K | 52  |
| IPI00215965 | K | 113 |
| IPI00215965 | K | 144 |
| IPI00215965 | K | 350 |
| IPI00215999 | K | 225 |
| IPI00216008 | K | 89  |
| IPI00216008 | K | 171 |
| IPI00216008 | K | 432 |
| IPI00216008 | K | 449 |
| IPI00216008 | K | 478 |
| IPI00216008 | K | 543 |
| IPI00216008 | K | 560 |
| IPI00216047 | K | 326 |

Table S1

|             |   |     |
|-------------|---|-----|
| IPI00216048 | K | 215 |
| IPI00216092 | K | 6   |
| IPI00216092 | K | 160 |
| IPI00216132 | K | 304 |
| IPI00216137 | K | 111 |
| IPI00216138 | K | 17  |
| IPI00216164 | K | 219 |
| IPI00216164 | K | 346 |
| IPI00216164 | K | 584 |
| IPI00216199 | K | 293 |
| IPI00216199 | K | 305 |
| IPI00216199 | K | 347 |
| IPI00216230 | K | 656 |
| IPI00216237 | K | 62  |
| IPI00216293 | K | 14  |
| IPI00216293 | K | 136 |
| IPI00216298 | K | 3   |
| IPI00216298 | K | 39  |
| IPI00216298 | K | 94  |
| IPI00216308 | K | 20  |
| IPI00216308 | K | 28  |
| IPI00216308 | K | 61  |
| IPI00216308 | K | 109 |
| IPI00216308 | K | 224 |
| IPI00216308 | K | 266 |
| IPI00216318 | K | 70  |
| IPI00216318 | K | 117 |
| IPI00216319 | K | 120 |
| IPI00216383 | K | 261 |
| IPI00216402 | K | 10  |
| IPI00216402 | K | 15  |
| IPI00216402 | K | 19  |
| IPI00216402 | K | 24  |
| IPI00216402 | K | 28  |
| IPI00216402 | K | 80  |
| IPI00216456 | K | 6   |
| IPI00216456 | K | 10  |
| IPI00216456 | K | 119 |
| IPI00216457 | K | 6   |
| IPI00216457 | K | 10  |
| IPI00216457 | K | 96  |
| IPI00216457 | K | 119 |
| IPI00216457 | K | 120 |
| IPI00216470 | K | 150 |
| IPI00216654 | K | 33  |
| IPI00216654 | K | 425 |
| IPI00216654 | K | 673 |
| IPI00216691 | K | 38  |
| IPI00216691 | K | 105 |
| IPI00216691 | K | 108 |
| IPI00216691 | K | 126 |
| IPI00216694 | K | 335 |

Table S1

|             |   |      |
|-------------|---|------|
| IPI00216704 | K | 1258 |
| IPI00216704 | K | 1262 |
| IPI00216730 | K | 6    |
| IPI00216737 | K | 20   |
| IPI00216873 | K | 99   |
| IPI00216932 | K | 396  |
| IPI00216932 | K | 642  |
| IPI00216951 | K | 74   |
| IPI00216951 | K | 374  |
| IPI00216975 | K | 112  |
| IPI00216975 | K | 118  |
| IPI00216975 | K | 161  |
| IPI00216975 | K | 213  |
| IPI00216975 | K | 220  |
| IPI00216975 | K | 251  |
| IPI00217013 | K | 655  |
| IPI00217018 | K | 1259 |
| IPI00217030 | K | 22   |
| IPI00217030 | K | 120  |
| IPI00217030 | K | 122  |
| IPI00217030 | K | 134  |
| IPI00217049 | K | 378  |
| IPI00217049 | K | 433  |
| IPI00217223 | K | 79   |
| IPI00217223 | K | 273  |
| IPI00217223 | K | 309  |
| IPI00217223 | K | 311  |
| IPI00217236 | K | 28   |
| IPI00217240 | K | 466  |
| IPI00217259 | K | 511  |
| IPI00217259 | K | 515  |
| IPI00217324 | K | 482  |
| IPI00217354 | K | 231  |
| IPI00217354 | K | 273  |
| IPI00217413 | K | 87   |
| IPI00217413 | K | 93   |
| IPI00217465 | K | 63   |
| IPI00217466 | K | 17   |
| IPI00217466 | K | 64   |
| IPI00217467 | K | 17   |
| IPI00217467 | K | 46   |
| IPI00217467 | K | 63   |
| IPI00217467 | K | 90   |
| IPI00217467 | K | 136  |
| IPI00217467 | K | 168  |
| IPI00217468 | K | 109  |
| IPI00217468 | K | 168  |
| IPI00217468 | K | 199  |
| IPI00217468 | K | 202  |
| IPI00217468 | K | 204  |
| IPI00217468 | K | 207  |
| IPI00217469 | K | 88   |

Table S1

|             |   |      |
|-------------|---|------|
| IPI00217469 | K | 93   |
| IPI00217471 | K | 60   |
| IPI00217477 | K | 12   |
| IPI00217477 | K | 59   |
| IPI00217477 | K | 145  |
| IPI00217536 | K | 92   |
| IPI00217660 | K | 113  |
| IPI00217660 | K | 238  |
| IPI00217686 | K | 20   |
| IPI00217686 | K | 233  |
| IPI00217686 | K | 234  |
| IPI00217732 | K | 538  |
| IPI00217773 | K | 701  |
| IPI00217773 | K | 725  |
| IPI00217773 | K | 726  |
| IPI00217773 | K | 738  |
| IPI00217801 | K | 533  |
| IPI00217871 | K | 99   |
| IPI00217871 | K | 114  |
| IPI00217871 | K | 402  |
| IPI00217872 | K | 34   |
| IPI00217872 | K | 437  |
| IPI00217872 | K | 475  |
| IPI00217920 | K | 50   |
| IPI00217949 | K | 68   |
| IPI00217950 | K | 3    |
| IPI00217950 | K | 5    |
| IPI00217950 | K | 11   |
| IPI00217950 | K | 54   |
| IPI00217950 | K | 56   |
| IPI00217950 | K | 59   |
| IPI00217950 | K | 82   |
| IPI00217950 | K | 90   |
| IPI00217963 | K | 162  |
| IPI00217963 | K | 169  |
| IPI00217975 | K | 33   |
| IPI00217975 | K | 123  |
| IPI00217975 | K | 124  |
| IPI00217975 | K | 157  |
| IPI00217975 | K | 181  |
| IPI00217975 | K | 182  |
| IPI00217975 | K | 271  |
| IPI00217975 | K | 483  |
| IPI00218054 | K | 20   |
| IPI00218087 | K | 220  |
| IPI00218087 | K | 222  |
| IPI00218087 | K | 224  |
| IPI00218094 | K | 1272 |
| IPI00218130 | K | 316  |
| IPI00218187 | K | 147  |
| IPI00218240 | K | 779  |
| IPI00218240 | K | 781  |

Table S1

|             |   |      |
|-------------|---|------|
| IPI00218342 | K | 56   |
| IPI00218342 | K | 553  |
| IPI00218343 | K | 40   |
| IPI00218343 | K | 60   |
| IPI00218343 | K | 112  |
| IPI00218343 | K | 163  |
| IPI00218343 | K | 164  |
| IPI00218343 | K | 280  |
| IPI00218343 | K | 311  |
| IPI00218343 | K | 370  |
| IPI00218343 | K | 394  |
| IPI00218343 | K | 401  |
| IPI00218371 | K | 176  |
| IPI00218371 | K | 194  |
| IPI00218448 | K | 5    |
| IPI00218448 | K | 8    |
| IPI00218448 | K | 12   |
| IPI00218448 | K | 14   |
| IPI00218448 | K | 116  |
| IPI00218465 | K | 529  |
| IPI00218488 | K | 31   |
| IPI00218568 | K | 41   |
| IPI00218570 | K | 100  |
| IPI00218591 | K | 38   |
| IPI00218591 | K | 179  |
| IPI00218606 | K | 135  |
| IPI00218624 | K | 16   |
| IPI00218624 | K | 288  |
| IPI00218624 | K | 2095 |
| IPI00218624 | K | 2103 |
| IPI00218693 | K | 114  |
| IPI00218728 | K | 53   |
| IPI00218733 | K | 71   |
| IPI00218733 | K | 123  |
| IPI00218748 | K | 76   |
| IPI00218748 | K | 120  |
| IPI00218748 | K | 121  |
| IPI00218823 | K | 926  |
| IPI00218823 | K | 2296 |
| IPI00218829 | K | 108  |
| IPI00218829 | K | 196  |
| IPI00218829 | K | 469  |
| IPI00218829 | K | 490  |
| IPI00218829 | K | 493  |
| IPI00218831 | K | 126  |
| IPI00218836 | K | 25   |
| IPI00218836 | K | 36   |
| IPI00218836 | K | 72   |
| IPI00218836 | K | 94   |
| IPI00218847 | K | 156  |
| IPI00218914 | K | 65   |
| IPI00218914 | K | 91   |



Table S1

|             |   |     |
|-------------|---|-----|
| IPI00218914 | K | 128 |
| IPI00218914 | K | 252 |
| IPI00218914 | K | 353 |
| IPI00218914 | K | 367 |
| IPI00218914 | K | 410 |
| IPI00218914 | K | 412 |
| IPI00218914 | K | 419 |
| IPI00218914 | K | 435 |
| IPI00218914 | K | 495 |
| IPI00218918 | K | 53  |
| IPI00218918 | K | 161 |
| IPI00218918 | K | 239 |
| IPI00218918 | K | 242 |
| IPI00218918 | K | 250 |
| IPI00218918 | K | 281 |
| IPI00218918 | K | 312 |
| IPI00218922 | K | 527 |
| IPI00218971 | K | 202 |
| IPI00219005 | K | 274 |
| IPI00219005 | K | 282 |
| IPI00219018 | K | 61  |
| IPI00219018 | K | 117 |
| IPI00219018 | K | 186 |
| IPI00219018 | K | 194 |
| IPI00219018 | K | 259 |
| IPI00219018 | K | 334 |
| IPI00219037 | K | 6   |
| IPI00219037 | K | 10  |
| IPI00219037 | K | 119 |
| IPI00219038 | K | 10  |
| IPI00219038 | K | 15  |
| IPI00219038 | K | 19  |
| IPI00219038 | K | 24  |
| IPI00219038 | K | 28  |
| IPI00219038 | K | 37  |
| IPI00219038 | K | 38  |
| IPI00219038 | K | 57  |
| IPI00219038 | K | 80  |
| IPI00219068 | K | 233 |
| IPI00219072 | K | 44  |
| IPI00219072 | K | 48  |
| IPI00219072 | K | 96  |
| IPI00219072 | K | 97  |
| IPI00219072 | K | 296 |
| IPI00219072 | K | 311 |
| IPI00219072 | K | 416 |
| IPI00219072 | K | 423 |
| IPI00219072 | K | 431 |
| IPI00219077 | K | 73  |
| IPI00219077 | K | 337 |
| IPI00219077 | K | 414 |
| IPI00219077 | K | 573 |

Table S1

|             |   |      |
|-------------|---|------|
| IPI00219078 | K | 464  |
| IPI00219097 | K | 3    |
| IPI00219097 | K | 12   |
| IPI00219097 | K | 30   |
| IPI00219097 | K | 43   |
| IPI00219097 | K | 44   |
| IPI00219097 | K | 59   |
| IPI00219097 | K | 139  |
| IPI00219097 | K | 157  |
| IPI00219097 | K | 172  |
| IPI00219097 | K | 173  |
| IPI00219097 | K | 182  |
| IPI00219155 | K | 27   |
| IPI00219155 | K | 93   |
| IPI00219155 | K | 98   |
| IPI00219155 | K | 117  |
| IPI00219155 | K | 128  |
| IPI00219156 | K | 26   |
| IPI00219160 | K | 36   |
| IPI00219160 | K | 37   |
| IPI00219173 | K | 482  |
| IPI00219179 | K | 289  |
| IPI00219217 | K | 7    |
| IPI00219217 | K | 58   |
| IPI00219217 | K | 60   |
| IPI00219217 | K | 82   |
| IPI00219217 | K | 119  |
| IPI00219217 | K | 318  |
| IPI00219217 | K | 319  |
| IPI00219217 | K | 329  |
| IPI00219219 | K | 29   |
| IPI00219299 | K | 1543 |
| IPI00219306 | K | 114  |
| IPI00219365 | K | 35   |
| IPI00219365 | K | 63   |
| IPI00219365 | K | 64   |
| IPI00219365 | K | 79   |
| IPI00219365 | K | 139  |
| IPI00219365 | K | 209  |
| IPI00219365 | K | 211  |
| IPI00219365 | K | 253  |
| IPI00219365 | K | 254  |
| IPI00219365 | K | 258  |
| IPI00219365 | K | 263  |
| IPI00219365 | K | 344  |
| IPI00219365 | K | 388  |
| IPI00219368 | K | 343  |
| IPI00219381 | K | 64   |
| IPI00219383 | K | 23   |
| IPI00219383 | K | 34   |
| IPI00219420 | K | 105  |
| IPI00219420 | K | 106  |

Table S1

|             |   |      |
|-------------|---|------|
| IPI00219420 | K | 114  |
| IPI00219420 | K | 140  |
| IPI00219420 | K | 215  |
| IPI00219420 | K | 336  |
| IPI00219420 | K | 1190 |
| IPI00219445 | K | 208  |
| IPI00219446 | K | 80   |
| IPI00219446 | K | 132  |
| IPI00219497 | K | 592  |
| IPI00219497 | K | 601  |
| IPI00219525 | K | 38   |
| IPI00219525 | K | 59   |
| IPI00219525 | K | 76   |
| IPI00219525 | K | 154  |
| IPI00219525 | K | 309  |
| IPI00219532 | K | 100  |
| IPI00219532 | K | 105  |
| IPI00219538 | K | 72   |
| IPI00219553 | K | 674  |
| IPI00219563 | K | 972  |
| IPI00219563 | K | 976  |
| IPI00219563 | K | 1074 |
| IPI00219568 | K | 91   |
| IPI00219568 | K | 156  |
| IPI00219568 | K | 267  |
| IPI00219575 | K | 391  |
| IPI00219601 | K | 35   |
| IPI00219616 | K | 194  |
| IPI00219622 | K | 70   |
| IPI00219622 | K | 171  |
| IPI00219673 | K | 71   |
| IPI00219673 | K | 169  |
| IPI00219678 | K | 141  |
| IPI00219691 | K | 166  |
| IPI00219691 | K | 168  |
| IPI00219691 | K | 180  |
| IPI00219691 | K | 225  |
| IPI00219691 | K | 226  |
| IPI00219695 | K | 38   |
| IPI00219695 | K | 312  |
| IPI00219729 | K | 73   |
| IPI00219757 | K | 121  |
| IPI00219757 | K | 128  |
| IPI00219757 | K | 191  |
| IPI00219757 | K | 209  |
| IPI00219894 | K | 22   |
| IPI00219913 | K | 291  |
| IPI00219913 | K | 313  |
| IPI00219913 | K | 449  |
| IPI00219919 | K | 28   |
| IPI00219919 | K | 35   |
| IPI00219919 | K | 36   |

Table S1

|             |   |     |
|-------------|---|-----|
| IPI00219919 | K | 37  |
| IPI00219953 | K | 87  |
| IPI00220014 | K | 233 |
| IPI00220219 | K | 318 |
| IPI00220219 | K | 627 |
| IPI00220289 | K | 186 |
| IPI00220289 | K | 198 |
| IPI00220301 | K | 63  |
| IPI00220301 | K | 209 |
| IPI00220360 | K | 8   |
| IPI00220360 | K | 32  |
| IPI00220360 | K | 36  |
| IPI00220362 | K | 56  |
| IPI00220362 | K | 70  |
| IPI00220362 | K | 86  |
| IPI00220362 | K | 99  |
| IPI00220373 | K | 308 |
| IPI00220373 | K | 425 |
| IPI00220373 | K | 427 |
| IPI00220403 | K | 6   |
| IPI00220403 | K | 12  |
| IPI00220403 | K | 13  |
| IPI00220403 | K | 16  |
| IPI00220403 | K | 17  |
| IPI00220403 | K | 21  |
| IPI00220403 | K | 24  |
| IPI00220403 | K | 47  |
| IPI00220403 | K | 109 |
| IPI00220403 | K | 121 |
| IPI00220416 | K | 12  |
| IPI00220416 | K | 78  |
| IPI00220477 | K | 136 |
| IPI00220477 | K | 143 |
| IPI00220484 | K | 82  |
| IPI00220486 | K | 418 |
| IPI00220487 | K | 63  |
| IPI00220487 | K | 72  |
| IPI00220487 | K | 73  |
| IPI00220487 | K | 78  |
| IPI00220487 | K | 85  |
| IPI00220487 | K | 95  |
| IPI00220487 | K | 99  |
| IPI00220487 | K | 117 |
| IPI00220487 | K | 148 |
| IPI00220487 | K | 149 |
| IPI00220566 | K | 153 |
| IPI00220637 | K | 323 |
| IPI00220642 | K | 120 |
| IPI00220656 | K | 295 |
| IPI00220710 | K | 103 |
| IPI00220710 | K | 157 |
| IPI00220710 | K | 250 |

Table S1

|             |   |     |
|-------------|---|-----|
| IPI00220710 | K | 407 |
| IPI00220726 | K | 215 |
| IPI00220766 | K | 148 |
| IPI00220827 | K | 4   |
| IPI00220827 | K | 15  |
| IPI00220827 | K | 17  |
| IPI00220827 | K | 26  |
| IPI00220827 | K | 39  |
| IPI00220828 | K | 4   |
| IPI00220828 | K | 12  |
| IPI00220828 | K | 17  |
| IPI00220828 | K | 26  |
| IPI00220828 | K | 32  |
| IPI00220828 | K | 39  |
| IPI00220834 | K | 144 |
| IPI00220834 | K | 155 |
| IPI00220834 | K | 156 |
| IPI00220834 | K | 195 |
| IPI00220834 | K | 265 |
| IPI00220834 | K | 332 |
| IPI00220834 | K | 338 |
| IPI00220834 | K | 532 |
| IPI00220834 | K | 660 |
| IPI00220834 | K | 665 |
| IPI00220871 | K | 10  |
| IPI00220901 | K | 477 |
| IPI00220906 | K | 104 |
| IPI00220994 | K | 12  |
| IPI00221088 | K | 155 |
| IPI00221089 | K | 27  |
| IPI00221089 | K | 39  |
| IPI00221089 | K | 93  |
| IPI00221089 | K | 94  |
| IPI00221091 | K | 124 |
| IPI00221092 | K | 60  |
| IPI00221093 | K | 19  |
| IPI00221106 | K | 275 |
| IPI00221222 | K | 35  |
| IPI00221222 | K | 68  |
| IPI00221226 | K | 63  |
| IPI00221226 | K | 68  |
| IPI00221226 | K | 75  |
| IPI00221226 | K | 81  |
| IPI00221226 | K | 299 |
| IPI00221226 | K | 306 |
| IPI00221226 | K | 370 |
| IPI00221226 | K | 418 |
| IPI00221226 | K | 442 |
| IPI00221226 | K | 445 |
| IPI00221226 | K | 483 |
| IPI00221226 | K | 607 |
| IPI00221226 | K | 620 |

Table S1

|             |   |      |
|-------------|---|------|
| IPI00221300 | K | 35   |
| IPI00221325 | K | 115  |
| IPI00221325 | K | 123  |
| IPI00221394 | K | 472  |
| IPI00221394 | K | 474  |
| IPI00221394 | K | 475  |
| IPI00221394 | K | 477  |
| IPI00232533 | K | 3    |
| IPI00232533 | K | 5    |
| IPI00232533 | K | 7    |
| IPI00234252 | K | 345  |
| IPI00234252 | K | 346  |
| IPI00234252 | K | 354  |
| IPI00234252 | K | 359  |
| IPI00234252 | K | 948  |
| IPI00234446 | K | 357  |
| IPI00234446 | K | 374  |
| IPI00239077 | K | 21   |
| IPI00239077 | K | 30   |
| IPI00239406 | K | 955  |
| IPI00240812 | K | 417  |
| IPI00240812 | K | 1136 |
| IPI00241860 | K | 126  |
| IPI00245135 | K | 264  |
| IPI00245135 | K | 295  |
| IPI00246058 | K | 48   |
| IPI00246058 | K | 215  |
| IPI00246188 | K | 47   |
| IPI00250153 | K | 116  |
| IPI00251559 | K | 350  |
| IPI00251749 | K | 481  |
| IPI00251749 | K | 493  |
| IPI00251749 | K | 495  |
| IPI00251749 | K | 496  |
| IPI00255316 | K | 6    |
| IPI00256605 | K | 302  |
| IPI00256861 | K | 90   |
| IPI00256861 | K | 4252 |
| IPI00257882 | K | 493  |
| IPI00288947 | K | 102  |
| IPI00289034 | K | 397  |
| IPI00289034 | K | 398  |
| IPI00289034 | K | 401  |
| IPI00289092 | K | 4    |
| IPI00289159 | K | 311  |
| IPI00289271 | K | 828  |
| IPI00289271 | K | 831  |
| IPI00289334 | K | 677  |
| IPI00289334 | K | 681  |
| IPI00289334 | K | 2170 |
| IPI00289334 | K | 2524 |
| IPI00289334 | K | 2576 |

Table S1

|             |   |      |
|-------------|---|------|
| IPI00289344 | K | 1336 |
| IPI00289344 | K | 1412 |
| IPI00289499 | K | 199  |
| IPI00289499 | K | 356  |
| IPI00289499 | K | 357  |
| IPI00289524 | K | 75   |
| IPI00289524 | K | 246  |
| IPI00289524 | K | 270  |
| IPI00289601 | K | 169  |
| IPI00289601 | K | 184  |
| IPI00289746 | K | 256  |
| IPI00289758 | K | 7    |
| IPI00289758 | K | 10   |
| IPI00289773 | K | 264  |
| IPI00289773 | K | 265  |
| IPI00289776 | K | 1790 |
| IPI00289776 | K | 2422 |
| IPI00289807 | K | 402  |
| IPI00289819 | K | 2352 |
| IPI00289862 | K | 306  |
| IPI00289866 | K | 245  |
| IPI00289866 | K | 248  |
| IPI00289866 | K | 262  |
| IPI00289866 | K | 265  |
| IPI00290094 | K | 315  |
| IPI00290142 | K | 100  |
| IPI00290184 | K | 250  |
| IPI00290204 | K | 118  |
| IPI00290204 | K | 162  |
| IPI00290314 | K | 633  |
| IPI00290416 | K | 216  |
| IPI00290416 | K | 242  |
| IPI00290416 | K | 294  |
| IPI00290416 | K | 297  |
| IPI00290460 | K | 78   |
| IPI00290547 | K | 1228 |
| IPI00290548 | K | 119  |
| IPI00290548 | K | 122  |
| IPI00290548 | K | 127  |
| IPI00290566 | K | 199  |
| IPI00290566 | K | 400  |
| IPI00290566 | K | 532  |
| IPI00290652 | K | 1050 |
| IPI00290652 | K | 1061 |
| IPI00290652 | K | 1339 |
| IPI00290857 | K | 208  |
| IPI00290952 | K | 652  |
| IPI00291006 | K | 91   |
| IPI00291006 | K | 157  |
| IPI00291006 | K | 165  |
| IPI00291006 | K | 185  |
| IPI00291006 | K | 215  |

Table S1

|             |   |      |
|-------------|---|------|
| IPI00291006 | K | 239  |
| IPI00291006 | K | 296  |
| IPI00291006 | K | 297  |
| IPI00291006 | K | 301  |
| IPI00291006 | K | 314  |
| IPI00291006 | K | 329  |
| IPI00291006 | K | 335  |
| IPI00291006 | K | 338  |
| IPI00291016 | K | 223  |
| IPI00291131 | K | 36   |
| IPI00291136 | K | 121  |
| IPI00291416 | K | 440  |
| IPI00291419 | K | 229  |
| IPI00291419 | K | 262  |
| IPI00291419 | K | 264  |
| IPI00291467 | K | 23   |
| IPI00291467 | K | 92   |
| IPI00291467 | K | 96   |
| IPI00291467 | K | 105  |
| IPI00291467 | K | 268  |
| IPI00291467 | K | 272  |
| IPI00291483 | K | 246  |
| IPI00291510 | K | 436  |
| IPI00291510 | K | 511  |
| IPI00291608 | K | 64   |
| IPI00291608 | K | 67   |
| IPI00291608 | K | 70   |
| IPI00291608 | K | 150  |
| IPI00291608 | K | 152  |
| IPI00291643 | K | 95   |
| IPI00291643 | K | 130  |
| IPI00291646 | K | 174  |
| IPI00291646 | K | 189  |
| IPI00291669 | K | 71   |
| IPI00291669 | K | 117  |
| IPI00291669 | K | 245  |
| IPI00291669 | K | 246  |
| IPI00291669 | K | 306  |
| IPI00291751 | K | 180  |
| IPI00291751 | K | 182  |
| IPI00291764 | K | 6    |
| IPI00291764 | K | 10   |
| IPI00291764 | K | 119  |
| IPI00291783 | K | 1363 |
| IPI00291800 | K | 486  |
| IPI00291916 | K | 1497 |
| IPI00291916 | K | 1533 |
| IPI00291930 | K | 643  |
| IPI00291939 | K | 282  |
| IPI00291939 | K | 437  |
| IPI00291939 | K | 536  |
| IPI00291939 | K | 648  |



Table S1

|             |   |      |
|-------------|---|------|
| IPI00291939 | K | 713  |
| IPI00292012 | K | 614  |
| IPI00292012 | K | 620  |
| IPI00292025 | K | 161  |
| IPI00292026 | K | 120  |
| IPI00292059 | K | 384  |
| IPI00292059 | K | 718  |
| IPI00292059 | K | 954  |
| IPI00292059 | K | 1120 |
| IPI00292135 | K | 55   |
| IPI00292135 | K | 190  |
| IPI00292135 | K | 594  |
| IPI00292135 | K | 601  |
| IPI00292140 | K | 82   |
| IPI00292238 | K | 128  |
| IPI00292445 | K | 63   |
| IPI00292537 | K | 432  |
| IPI00292537 | K | 441  |
| IPI00292537 | K | 442  |
| IPI00292746 | K | 249  |
| IPI00292753 | K | 238  |
| IPI00292763 | K | 495  |
| IPI00292771 | K | 379  |
| IPI00292771 | K | 891  |
| IPI00292771 | K | 1511 |
| IPI00292771 | K | 2070 |
| IPI00292771 | K | 2071 |
| IPI00292812 | K | 271  |
| IPI00292812 | K | 274  |
| IPI00292812 | K | 276  |
| IPI00293009 | K | 282  |
| IPI00293026 | K | 528  |
| IPI00293126 | K | 219  |
| IPI00293276 | K | 78   |
| IPI00293331 | K | 40   |
| IPI00293331 | K | 46   |
| IPI00293350 | K | 68   |
| IPI00293350 | K | 252  |
| IPI00293426 | K | 188  |
| IPI00293426 | K | 455  |
| IPI00293464 | K | 153  |
| IPI00293464 | K | 383  |
| IPI00293464 | K | 1067 |
| IPI00293523 | K | 209  |
| IPI00293523 | K | 213  |
| IPI00293523 | K | 218  |
| IPI00293564 | K | 48   |
| IPI00293564 | K | 93   |
| IPI00293568 | K | 123  |
| IPI00293613 | K | 584  |
| IPI00293613 | K | 587  |
| IPI00293655 | K | 239  |

Table S1

|             |   |      |
|-------------|---|------|
| IPI00293655 | K | 268  |
| IPI00293655 | K | 281  |
| IPI00293657 | K | 29   |
| IPI00293657 | K | 31   |
| IPI00293657 | K | 32   |
| IPI00293657 | K | 75   |
| IPI00293657 | K | 78   |
| IPI00293746 | K | 53   |
| IPI00293845 | K | 1274 |
| IPI00293921 | K | 581  |
| IPI00294084 | K | 385  |
| IPI00294084 | K | 685  |
| IPI00294084 | K | 741  |
| IPI00294158 | K | 248  |
| IPI00294158 | K | 253  |
| IPI00294158 | K | 269  |
| IPI00294159 | K | 97   |
| IPI00294159 | K | 160  |
| IPI00294159 | K | 255  |
| IPI00294186 | K | 264  |
| IPI00294186 | K | 342  |
| IPI00294186 | K | 379  |
| IPI00294186 | K | 380  |
| IPI00294186 | K | 459  |
| IPI00294211 | K | 260  |
| IPI00294211 | K | 521  |
| IPI00294211 | K | 522  |
| IPI00294495 | K | 122  |
| IPI00294603 | K | 1282 |
| IPI00294742 | K | 325  |
| IPI00294742 | K | 581  |
| IPI00294744 | K | 220  |
| IPI00294744 | K | 499  |
| IPI00294744 | K | 566  |
| IPI00294779 | K | 20   |
| IPI00294779 | K | 28   |
| IPI00294779 | K | 62   |
| IPI00294779 | K | 64   |
| IPI00294779 | K | 91   |
| IPI00294840 | K | 747  |
| IPI00294842 | K | 134  |
| IPI00294842 | K | 136  |
| IPI00294879 | K | 26   |
| IPI00294879 | K | 524  |
| IPI00294879 | K | 528  |
| IPI00294943 | K | 142  |
| IPI00294943 | K | 144  |
| IPI00294982 | K | 266  |
| IPI00294982 | K | 268  |
| IPI00294982 | K | 299  |
| IPI00294982 | K | 302  |
| IPI00294982 | K | 303  |

Table S1

|             |   |      |
|-------------|---|------|
| IPI00295004 | K | 533  |
| IPI00295209 | K | 275  |
| IPI00295363 | K | 46   |
| IPI00295363 | K | 88   |
| IPI00295363 | K | 231  |
| IPI00295363 | K | 238  |
| IPI00295400 | K | 366  |
| IPI00295485 | K | 272  |
| IPI00296022 | K | 42   |
| IPI00296022 | K | 85   |
| IPI00296053 | K | 66   |
| IPI00296053 | K | 80   |
| IPI00296053 | K | 94   |
| IPI00296053 | K | 115  |
| IPI00296053 | K | 256  |
| IPI00296053 | K | 292  |
| IPI00296053 | K | 477  |
| IPI00296069 | K | 867  |
| IPI00296183 | K | 3    |
| IPI00296183 | K | 178  |
| IPI00296183 | K | 194  |
| IPI00296183 | K | 269  |
| IPI00296337 | K | 117  |
| IPI00296337 | K | 254  |
| IPI00296337 | K | 828  |
| IPI00296337 | K | 832  |
| IPI00296337 | K | 1057 |
| IPI00296337 | K | 1074 |
| IPI00296337 | K | 1209 |
| IPI00296337 | K | 1970 |
| IPI00296337 | K | 2259 |
| IPI00296337 | K | 2702 |
| IPI00296337 | K | 2703 |
| IPI00296337 | K | 3241 |
| IPI00296337 | K | 3260 |
| IPI00296337 | K | 3608 |
| IPI00296337 | K | 3621 |
| IPI00296337 | K | 3638 |
| IPI00296337 | K | 3642 |
| IPI00296388 | K | 680  |
| IPI00296441 | K | 54   |
| IPI00296441 | K | 232  |
| IPI00296441 | K | 312  |
| IPI00296635 | K | 68   |
| IPI00296830 | K | 297  |
| IPI00296907 | K | 89   |
| IPI00296907 | K | 255  |
| IPI00296907 | K | 267  |
| IPI00296907 | K | 272  |
| IPI00296907 | K | 437  |
| IPI00296907 | K | 500  |
| IPI00296907 | K | 504  |

Table S1

|             |   |      |
|-------------|---|------|
| IPI00296907 | K | 643  |
| IPI00296907 | K | 651  |
| IPI00296913 | K | 42   |
| IPI00296913 | K | 210  |
| IPI00296913 | K | 218  |
| IPI00296934 | K | 112  |
| IPI00297145 | K | 85   |
| IPI00297211 | K | 440  |
| IPI00297254 | K | 1448 |
| IPI00297333 | K | 288  |
| IPI00297333 | K | 312  |
| IPI00297333 | K | 314  |
| IPI00297333 | K | 319  |
| IPI00297455 | K | 257  |
| IPI00297477 | K | 172  |
| IPI00297477 | K | 179  |
| IPI00297550 | K | 74   |
| IPI00297550 | K | 222  |
| IPI00297550 | K | 678  |
| IPI00297572 | K | 576  |
| IPI00297572 | K | 1052 |
| IPI00297579 | K | 10   |
| IPI00297579 | K | 21   |
| IPI00297579 | K | 34   |
| IPI00297579 | K | 44   |
| IPI00297579 | K | 50   |
| IPI00297579 | K | 143  |
| IPI00297779 | K | 13   |
| IPI00297779 | K | 154  |
| IPI00297779 | K | 181  |
| IPI00297851 | K | 1338 |
| IPI00297851 | K | 1346 |
| IPI00297921 | K | 238  |
| IPI00297931 | K | 513  |
| IPI00297931 | K | 744  |
| IPI00298007 | K | 7    |
| IPI00298007 | K | 50   |
| IPI00298007 | K | 414  |
| IPI00298041 | K | 105  |
| IPI00298058 | K | 328  |
| IPI00298202 | K | 52   |
| IPI00298202 | K | 318  |
| IPI00298301 | K | 1877 |
| IPI00298301 | K | 1880 |
| IPI00298308 | K | 886  |
| IPI00298308 | K | 903  |
| IPI00298406 | K | 238  |
| IPI00298406 | K | 244  |
| IPI00298406 | K | 261  |
| IPI00298406 | K | 317  |
| IPI00298406 | K | 388  |
| IPI00298423 | K | 194  |

Table S1

|             |   |      |
|-------------|---|------|
| IPI00298520 | K | 274  |
| IPI00298547 | K | 148  |
| IPI00298558 | K | 179  |
| IPI00298612 | K | 184  |
| IPI00298612 | K | 192  |
| IPI00298612 | K | 233  |
| IPI00298612 | K | 245  |
| IPI00298731 | K | 207  |
| IPI00298731 | K | 239  |
| IPI00298731 | K | 274  |
| IPI00298860 | K | 321  |
| IPI00298935 | K | 361  |
| IPI00298946 | K | 131  |
| IPI00298961 | K | 446  |
| IPI00298961 | K | 455  |
| IPI00298961 | K | 568  |
| IPI00298961 | K | 686  |
| IPI00298961 | K | 693  |
| IPI00298994 | K | 2031 |
| IPI00298994 | K | 2043 |
| IPI00298994 | K | 2115 |
| IPI00299048 | K | 1467 |
| IPI00299048 | K | 1471 |
| IPI00299048 | K | 1474 |
| IPI00299095 | K | 447  |
| IPI00299095 | K | 469  |
| IPI00299145 | K | 173  |
| IPI00299147 | K | 11   |
| IPI00299147 | K | 41   |
| IPI00299147 | K | 44   |
| IPI00299149 | K | 11   |
| IPI00299149 | K | 42   |
| IPI00299149 | K | 45   |
| IPI00299155 | K | 127  |
| IPI00299155 | K | 176  |
| IPI00299155 | K | 180  |
| IPI00299155 | K | 238  |
| IPI00299214 | K | 220  |
| IPI00299254 | K | 784  |
| IPI00299254 | K | 923  |
| IPI00299263 | K | 223  |
| IPI00299263 | K | 228  |
| IPI00299263 | K | 229  |
| IPI00299313 | K | 158  |
| IPI00299402 | K | 1090 |
| IPI00299417 | K | 24   |
| IPI00299463 | K | 208  |
| IPI00299463 | K | 233  |
| IPI00299463 | K | 334  |
| IPI00299463 | K | 441  |
| IPI00299463 | K | 504  |
| IPI00299463 | K | 544  |

Table S1

|             |   |      |
|-------------|---|------|
| IPI00299463 | K | 665  |
| IPI00299463 | K | 690  |
| IPI00299463 | K | 698  |
| IPI00299463 | K | 715  |
| IPI00299465 | K | 259  |
| IPI00299465 | K | 263  |
| IPI00299507 | K | 637  |
| IPI00299507 | K | 640  |
| IPI00299512 | K | 1581 |
| IPI00299571 | K | 154  |
| IPI00299571 | K | 293  |
| IPI00299573 | K | 34   |
| IPI00299573 | K | 48   |
| IPI00299573 | K | 97   |
| IPI00299573 | K | 150  |
| IPI00299573 | K | 217  |
| IPI00299608 | K | 310  |
| IPI00299749 | K | 487  |
| IPI00300026 | K | 197  |
| IPI00300027 | K | 106  |
| IPI00300052 | K | 175  |
| IPI00300052 | K | 182  |
| IPI00300060 | K | 452  |
| IPI00300060 | K | 520  |
| IPI00300074 | K | 329  |
| IPI00300078 | K | 700  |
| IPI00300127 | K | 426  |
| IPI00300186 | K | 360  |
| IPI00300341 | K | 32   |
| IPI00300371 | K | 109  |
| IPI00300371 | K | 126  |
| IPI00300371 | K | 936  |
| IPI00300386 | K | 453  |
| IPI00300567 | K | 89   |
| IPI00300567 | K | 283  |
| IPI00300631 | K | 294  |
| IPI00300631 | K | 475  |
| IPI00300631 | K | 607  |
| IPI00300631 | K | 805  |
| IPI00300725 | K | 173  |
| IPI00301058 | K | 283  |
| IPI00301154 | K | 213  |
| IPI00301154 | K | 259  |
| IPI00301224 | K | 236  |
| IPI00301263 | K | 747  |
| IPI00301263 | K | 1411 |
| IPI00301323 | K | 7    |
| IPI00301323 | K | 458  |
| IPI00301323 | K | 460  |
| IPI00301323 | K | 571  |
| IPI00301364 | K | 163  |
| IPI00301434 | K | 113  |

Table S1

|             |   |      |
|-------------|---|------|
| IPI00301518 | K | 149  |
| IPI00301609 | K | 731  |
| IPI00301844 | K | 193  |
| IPI00301994 | K | 203  |
| IPI00301994 | K | 234  |
| IPI00302238 | K | 383  |
| IPI00302742 | K | 133  |
| IPI00302829 | K | 427  |
| IPI00302829 | K | 548  |
| IPI00302829 | K | 640  |
| IPI00302829 | K | 652  |
| IPI00302829 | K | 873  |
| IPI00302829 | K | 874  |
| IPI00302829 | K | 896  |
| IPI00302927 | K | 139  |
| IPI00302927 | K | 288  |
| IPI00302927 | K | 302  |
| IPI00302927 | K | 319  |
| IPI00302927 | K | 326  |
| IPI00302927 | K | 489  |
| IPI00303133 | K | 6    |
| IPI00303133 | K | 12   |
| IPI00303133 | K | 13   |
| IPI00303133 | K | 16   |
| IPI00303133 | K | 21   |
| IPI00303133 | K | 24   |
| IPI00303133 | K | 109  |
| IPI00303133 | K | 121  |
| IPI00303135 | K | 244  |
| IPI00303135 | K | 247  |
| IPI00303135 | K | 250  |
| IPI00303152 | K | 1401 |
| IPI00303152 | K | 1404 |
| IPI00303152 | K | 1410 |
| IPI00303160 | K | 262  |
| IPI00303174 | K | 98   |
| IPI00303207 | K | 121  |
| IPI00303207 | K | 191  |
| IPI00303207 | K | 210  |
| IPI00303207 | K | 349  |
| IPI00303207 | K | 431  |
| IPI00303402 | K | 112  |
| IPI00303402 | K | 183  |
| IPI00303476 | K | 133  |
| IPI00303476 | K | 198  |
| IPI00303476 | K | 259  |
| IPI00303476 | K | 426  |
| IPI00303476 | K | 485  |
| IPI00303476 | K | 522  |
| IPI00303797 | K | 418  |
| IPI00303832 | K | 413  |
| IPI00303882 | K | 65   |

Table S1

|             |   |     |
|-------------|---|-----|
| IPI00303954 | K | 34  |
| IPI00304071 | K | 296 |
| IPI00304306 | K | 93  |
| IPI00304409 | K | 68  |
| IPI00304417 | K | 154 |
| IPI00304417 | K | 201 |
| IPI00304417 | K | 207 |
| IPI00304417 | K | 382 |
| IPI00304431 | K | 258 |
| IPI00304435 | K | 51  |
| IPI00304435 | K | 146 |
| IPI00304493 | K | 423 |
| IPI00304527 | K | 418 |
| IPI00304596 | K | 5   |
| IPI00304596 | K | 11  |
| IPI00304596 | K | 64  |
| IPI00304596 | K | 68  |
| IPI00304596 | K | 96  |
| IPI00304596 | K | 107 |
| IPI00304596 | K | 109 |
| IPI00304596 | K | 198 |
| IPI00304596 | K | 467 |
| IPI00304612 | K | 25  |
| IPI00304612 | K | 191 |
| IPI00304692 | K | 30  |
| IPI00304740 | K | 472 |
| IPI00304740 | K | 475 |
| IPI00304740 | K | 495 |
| IPI00304814 | K | 47  |
| IPI00304925 | K | 71  |
| IPI00304925 | K | 88  |
| IPI00304925 | K | 108 |
| IPI00304925 | K | 112 |
| IPI00304925 | K | 246 |
| IPI00304925 | K | 319 |
| IPI00304925 | K | 348 |
| IPI00304925 | K | 500 |
| IPI00305068 | K | 585 |
| IPI00305144 | K | 217 |
| IPI00305166 | K | 179 |
| IPI00305166 | K | 335 |
| IPI00305166 | K | 485 |
| IPI00305166 | K | 498 |
| IPI00305166 | K | 538 |
| IPI00305166 | K | 541 |
| IPI00305166 | K | 547 |
| IPI00305227 | K | 7   |
| IPI00305227 | K | 16  |
| IPI00305227 | K | 18  |
| IPI00305289 | K | 146 |
| IPI00305360 | K | 217 |
| IPI00305374 | K | 133 |



Table S1

|             |   |      |
|-------------|---|------|
| IPI00305374 | K | 300  |
| IPI00305383 | K | 159  |
| IPI00305383 | K | 250  |
| IPI00305545 | K | 128  |
| IPI00306043 | K | 245  |
| IPI00306043 | K | 401  |
| IPI00306048 | K | 135  |
| IPI00306048 | K | 427  |
| IPI00306280 | K | 59   |
| IPI00306290 | K | 634  |
| IPI00306301 | K | 115  |
| IPI00306301 | K | 121  |
| IPI00306301 | K | 359  |
| IPI00306301 | K | 374  |
| IPI00306311 | K | 64   |
| IPI00306332 | K | 27   |
| IPI00306332 | K | 77   |
| IPI00306332 | K | 93   |
| IPI00306369 | K | 586  |
| IPI00306380 | K | 79   |
| IPI00306430 | K | 33   |
| IPI00306430 | K | 116  |
| IPI00306642 | K | 201  |
| IPI00306667 | K | 175  |
| IPI00306708 | K | 64   |
| IPI00306708 | K | 65   |
| IPI00306723 | K | 695  |
| IPI00306749 | K | 793  |
| IPI00306959 | K | 101  |
| IPI00306959 | K | 199  |
| IPI00306959 | K | 296  |
| IPI00306960 | K | 244  |
| IPI00306960 | K | 490  |
| IPI00307092 | K | 116  |
| IPI00307092 | K | 169  |
| IPI00307092 | K | 430  |
| IPI00307162 | K | 173  |
| IPI00307162 | K | 496  |
| IPI00307162 | K | 1070 |
| IPI00307246 | K | 289  |
| IPI00307259 | K | 84   |
| IPI00307430 | K | 1072 |
| IPI00307659 | K | 240  |
| IPI00307755 | K | 69   |
| IPI00328156 | K | 52   |
| IPI00328161 | K | 377  |
| IPI00328257 | K | 318  |
| IPI00328258 | K | 239  |
| IPI00328293 | K | 140  |
| IPI00328306 | K | 764  |
| IPI00328319 | K | 4    |
| IPI00328319 | K | 22   |

Table S1

|             |   |     |
|-------------|---|-----|
| IPI00328361 | K | 110 |
| IPI00328391 | K | 270 |
| IPI00328409 | K | 891 |
| IPI00328415 | K | 42  |
| IPI00328415 | K | 120 |
| IPI00328526 | K | 58  |
| IPI00328798 | K | 36  |
| IPI00328798 | K | 108 |
| IPI00328798 | K | 110 |
| IPI00328798 | K | 112 |
| IPI00328798 | K | 137 |
| IPI00328815 | K | 968 |
| IPI00328847 | K | 14  |
| IPI00328868 | K | 337 |
| IPI00328918 | K | 31  |
| IPI00328918 | K | 33  |
| IPI00328918 | K | 35  |
| IPI00328929 | K | 814 |
| IPI00328987 | K | 15  |
| IPI00329132 | K | 233 |
| IPI00329142 | K | 12  |
| IPI00329213 | K | 371 |
| IPI00329331 | K | 438 |
| IPI00329338 | K | 8   |
| IPI00329389 | K | 5   |
| IPI00329389 | K | 210 |
| IPI00329389 | K | 239 |
| IPI00329512 | K | 8   |
| IPI00329512 | K | 32  |
| IPI00329512 | K | 36  |
| IPI00329528 | K | 701 |
| IPI00329633 | K | 243 |
| IPI00329633 | K | 306 |
| IPI00329633 | K | 660 |
| IPI00329665 | K | 6   |
| IPI00329665 | K | 12  |
| IPI00329665 | K | 13  |
| IPI00329665 | K | 16  |
| IPI00329665 | K | 17  |
| IPI00329665 | K | 21  |
| IPI00329665 | K | 24  |
| IPI00329665 | K | 25  |
| IPI00329665 | K | 35  |
| IPI00329665 | K | 47  |
| IPI00329665 | K | 86  |
| IPI00329665 | K | 109 |
| IPI00329665 | K | 121 |
| IPI00329692 | K | 55  |
| IPI00329742 | K | 203 |
| IPI00329742 | K | 234 |
| IPI00329755 | K | 380 |
| IPI00329791 | K | 263 |

Table S1

|             |   |      |
|-------------|---|------|
| IPI00329791 | K | 271  |
| IPI00329791 | K | 776  |
| IPI00329791 | K | 779  |
| IPI00329791 | K | 848  |
| IPI00329801 | K | 70   |
| IPI00329801 | K | 76   |
| IPI00329801 | K | 79   |
| IPI00329801 | K | 97   |
| IPI00329801 | K | 101  |
| IPI00332376 | K | 8    |
| IPI00332376 | K | 144  |
| IPI00333010 | K | 18   |
| IPI00333010 | K | 239  |
| IPI00333010 | K | 879  |
| IPI00333010 | K | 901  |
| IPI00333143 | K | 484  |
| IPI00333201 | K | 84   |
| IPI00333215 | K | 84   |
| IPI00333533 | K | 631  |
| IPI00333533 | K | 633  |
| IPI00333533 | K | 634  |
| IPI00333541 | K | 504  |
| IPI00333541 | K | 508  |
| IPI00333541 | K | 578  |
| IPI00333541 | K | 700  |
| IPI00333541 | K | 704  |
| IPI00333541 | K | 781  |
| IPI00333541 | K | 837  |
| IPI00333541 | K | 891  |
| IPI00333541 | K | 973  |
| IPI00333541 | K | 994  |
| IPI00333541 | K | 1071 |
| IPI00333541 | K | 1538 |
| IPI00333541 | K | 2024 |
| IPI00333541 | K | 2513 |
| IPI00333541 | K | 2515 |
| IPI00333541 | K | 2607 |
| IPI00333541 | K | 2621 |
| IPI00333770 | K | 834  |
| IPI00333770 | K | 1593 |
| IPI00333913 | K | 1057 |
| IPI00334159 | K | 95   |
| IPI00334190 | K | 145  |
| IPI00334190 | K | 233  |
| IPI00334587 | K | 318  |
| IPI00334587 | K | 330  |
| IPI00334715 | K | 193  |
| IPI00335001 | K | 81   |
| IPI00335385 | K | 138  |
| IPI00335385 | K | 142  |
| IPI00335421 | K | 339  |
| IPI00335541 | K | 299  |

Table S1

|             |   |      |
|-------------|---|------|
| IPI00336008 | K | 126  |
| IPI00336008 | K | 371  |
| IPI00336016 | K | 329  |
| IPI00336081 | K | 608  |
| IPI00336081 | K | 1744 |
| IPI00336081 | K | 1747 |
| IPI00337315 | K | 7    |
| IPI00337315 | K | 1571 |
| IPI00337386 | K | 233  |
| IPI00337386 | K | 717  |
| IPI00337386 | K | 907  |
| IPI00337386 | K | 910  |
| IPI00337386 | K | 911  |
| IPI00337397 | K | 586  |
| IPI00337494 | K | 336  |
| IPI00337494 | K | 437  |
| IPI00337541 | K | 70   |
| IPI00337541 | K | 100  |
| IPI00337541 | K | 331  |
| IPI00337541 | K | 394  |
| IPI00337541 | K | 397  |
| IPI00339269 | K | 321  |
| IPI00339269 | K | 502  |
| IPI00339274 | K | 6    |
| IPI00339384 | K | 112  |
| IPI00373877 | K | 247  |
| IPI00374657 | K | 125  |
| IPI00374975 | K | 5    |
| IPI00374975 | K | 100  |
| IPI00374975 | K | 106  |
| IPI00374975 | K | 113  |
| IPI00375127 | K | 291  |
| IPI00375339 | K | 45   |
| IPI00375358 | K | 634  |
| IPI00375380 | K | 300  |
| IPI00375531 | K | 56   |
| IPI00375531 | K | 81   |
| IPI00375676 | K | 98   |
| IPI00375731 | K | 448  |
| IPI00376005 | K | 57   |
| IPI00376005 | K | 77   |
| IPI00376005 | K | 97   |
| IPI00376005 | K | 98   |
| IPI00376119 | K | 314  |
| IPI00376317 | K | 125  |
| IPI00376379 | K | 181  |
| IPI00376798 | K | 52   |
| IPI00376798 | K | 85   |
| IPI00376798 | K | 159  |
| IPI00376976 | K | 182  |
| IPI00376976 | K | 184  |
| IPI00377245 | K | 1974 |

Table S1

|             |   |      |
|-------------|---|------|
| IPI00377245 | K | 2196 |
| IPI00377245 | K | 2883 |
| IPI00377245 | K | 3161 |
| IPI00377245 | K | 4193 |
| IPI00377245 | K | 4244 |
| IPI00377245 | K | 4504 |
| IPI00377245 | K | 5004 |
| IPI00382470 | K | 191  |
| IPI00382470 | K | 222  |
| IPI00382470 | K | 346  |
| IPI00382470 | K | 414  |
| IPI00382470 | K | 416  |
| IPI00382470 | K | 436  |
| IPI00382470 | K | 449  |
| IPI00382470 | K | 484  |
| IPI00382470 | K | 529  |
| IPI00382470 | K | 532  |
| IPI00382470 | K | 558  |
| IPI00382470 | K | 565  |
| IPI00382470 | K | 580  |
| IPI00382470 | K | 600  |
| IPI00382470 | K | 611  |
| IPI00382470 | K | 668  |
| IPI00382470 | K | 680  |
| IPI00382470 | K | 695  |
| IPI00382470 | K | 698  |
| IPI00382470 | K | 707  |
| IPI00382470 | K | 753  |
| IPI00383046 | K | 36   |
| IPI00383105 | K | 490  |
| IPI00383105 | K | 499  |
| IPI00383163 | K | 81   |
| IPI00384028 | K | 657  |
| IPI00384028 | K | 666  |
| IPI00384028 | K | 752  |
| IPI00384028 | K | 756  |
| IPI00384047 | K | 98   |
| IPI00384202 | K | 552  |
| IPI00384233 | K | 43   |
| IPI00384428 | K | 126  |
| IPI00384428 | K | 257  |
| IPI00384456 | K | 70   |
| IPI00384456 | K | 504  |
| IPI00384471 | K | 368  |
| IPI00384471 | K | 418  |
| IPI00384471 | K | 516  |
| IPI00384471 | K | 519  |
| IPI00384471 | K | 521  |
| IPI00384471 | K | 523  |
| IPI00384471 | K | 887  |
| IPI00384471 | K | 1034 |
| IPI00384643 | K | 321  |

Table S1

|             |   |      |
|-------------|---|------|
| IPI00384707 | K | 486  |
| IPI00384857 | K | 8    |
| IPI00384872 | K | 350  |
| IPI00384972 | K | 104  |
| IPI00384972 | K | 180  |
| IPI00385042 | K | 103  |
| IPI00385042 | K | 522  |
| IPI00385055 | K | 890  |
| IPI00385267 | K | 163  |
| IPI00385267 | K | 169  |
| IPI00385267 | K | 170  |
| IPI00385449 | K | 570  |
| IPI00385449 | K | 604  |
| IPI00385449 | K | 628  |
| IPI00385631 | K | 2667 |
| IPI00386122 | K | 140  |
| IPI00386189 | K | 34   |
| IPI00386189 | K | 262  |
| IPI00386189 | K | 735  |
| IPI00386189 | K | 756  |
| IPI00386448 | K | 122  |
| IPI00386448 | K | 123  |
| IPI00386448 | K | 218  |
| IPI00386448 | K | 221  |
| IPI00386448 | K | 310  |
| IPI00386448 | K | 314  |
| IPI00386448 | K | 315  |
| IPI00386803 | K | 23   |
| IPI00386803 | K | 36   |
| IPI00386803 | K | 42   |
| IPI00386803 | K | 128  |
| IPI00386930 | K | 262  |
| IPI00386930 | K | 384  |
| IPI00386998 | K | 36   |
| IPI00387159 | K | 164  |
| IPI00387159 | K | 165  |
| IPI00387159 | K | 181  |
| IPI00387159 | K | 264  |
| IPI00394657 | K | 85   |
| IPI00394926 | K | 286  |
| IPI00394926 | K | 287  |
| IPI00394926 | K | 298  |
| IPI00394926 | K | 302  |
| IPI00395337 | K | 294  |
| IPI00395627 | K | 8    |
| IPI00395627 | K | 19   |
| IPI00395627 | K | 85   |
| IPI00395627 | K | 118  |
| IPI00395627 | K | 134  |
| IPI00395865 | K | 4    |
| IPI00395865 | K | 21   |
| IPI00395865 | K | 119  |

Table S1

|             |   |      |
|-------------|---|------|
| IPI00395939 | K | 217  |
| IPI00396008 | K | 582  |
| IPI00396015 | K | 1371 |
| IPI00396015 | K | 1617 |
| IPI00396015 | K | 2068 |
| IPI00396048 | K | 245  |
| IPI00396089 | K | 85   |
| IPI00396154 | K | 124  |
| IPI00396154 | K | 296  |
| IPI00396174 | K | 23   |
| IPI00396258 | K | 321  |
| IPI00396258 | K | 377  |
| IPI00396276 | K | 108  |
| IPI00396276 | K | 117  |
| IPI00396286 | K | 133  |
| IPI00396321 | K | 111  |
| IPI00396329 | K | 47   |
| IPI00396329 | K | 56   |
| IPI00396341 | K | 848  |
| IPI00396341 | K | 859  |
| IPI00396378 | K | 3    |
| IPI00396378 | K | 112  |
| IPI00396378 | K | 168  |
| IPI00396378 | K | 173  |
| IPI00396435 | K | 17   |
| IPI00396435 | K | 18   |
| IPI00396435 | K | 132  |
| IPI00396435 | K | 488  |
| IPI00396435 | K | 754  |
| IPI00396435 | K | 760  |
| IPI00396485 | K | 41   |
| IPI00396485 | K | 44   |
| IPI00396485 | K | 55   |
| IPI00396485 | K | 79   |
| IPI00396485 | K | 146  |
| IPI00396485 | K | 172  |
| IPI00396485 | K | 179  |
| IPI00396485 | K | 180  |
| IPI00396485 | K | 255  |
| IPI00396485 | K | 318  |
| IPI00396485 | K | 386  |
| IPI00396485 | K | 392  |
| IPI00396485 | K | 395  |
| IPI00396485 | K | 439  |
| IPI00396485 | K | 443  |
| IPI00396552 | K | 279  |
| IPI00396577 | K | 1619 |
| IPI00396577 | K | 1830 |
| IPI00396627 | K | 152  |
| IPI00397358 | K | 70   |
| IPI00397366 | K | 309  |
| IPI00397366 | K | 310  |

Table S1

|             |   |      |
|-------------|---|------|
| IPI00397366 | K | 322  |
| IPI00397376 | K | 357  |
| IPI00397383 | K | 7    |
| IPI00397571 | K | 253  |
| IPI00397740 | K | 466  |
| IPI00397860 | K | 19   |
| IPI00397860 | K | 24   |
| IPI00398406 | K | 4    |
| IPI00398406 | K | 249  |
| IPI00398406 | K | 270  |
| IPI00398406 | K | 282  |
| IPI00398406 | K | 403  |
| IPI00398749 | K | 672  |
| IPI00399266 | K | 168  |
| IPI00401962 | K | 48   |
| IPI00402077 | K | 50   |
| IPI00402231 | K | 41   |
| IPI00402231 | K | 56   |
| IPI00402759 | K | 20   |
| IPI00409671 | K | 5    |
| IPI00409671 | K | 25   |
| IPI00409675 | K | 143  |
| IPI00409698 | K | 862  |
| IPI00409717 | K | 293  |
| IPI00409750 | K | 232  |
| IPI00410039 | K | 235  |
| IPI00410039 | K | 240  |
| IPI00410256 | K | 780  |
| IPI00410287 | K | 40   |
| IPI00410287 | K | 42   |
| IPI00410287 | K | 80   |
| IPI00410351 | K | 1352 |
| IPI00410351 | K | 1428 |
| IPI00410402 | K | 40   |
| IPI00410402 | K | 60   |
| IPI00410402 | K | 326  |
| IPI00410496 | K | 102  |
| IPI00410496 | K | 117  |
| IPI00410590 | K | 291  |
| IPI00410616 | K | 50   |
| IPI00410616 | K | 154  |
| IPI00410618 | K | 108  |
| IPI00410693 | K | 68   |
| IPI00410693 | K | 122  |
| IPI00410693 | K | 140  |
| IPI00410693 | K | 211  |
| IPI00410714 | K | 17   |
| IPI00410717 | K | 801  |
| IPI00411303 | K | 342  |
| IPI00411303 | K | 345  |
| IPI00411303 | K | 348  |
| IPI00411356 | K | 8    |



Table S1

|             |   |      |
|-------------|---|------|
| IPI00411559 | K | 363  |
| IPI00411559 | K | 381  |
| IPI00411559 | K | 679  |
| IPI00411559 | K | 1037 |
| IPI00411614 | K | 962  |
| IPI00411614 | K | 1127 |
| IPI00411706 | K | 10   |
| IPI00411706 | K | 39   |
| IPI00411706 | K | 200  |
| IPI00411706 | K | 278  |
| IPI00411937 | K | 505  |
| IPI00411937 | K | 507  |
| IPI00412344 | K | 585  |
| IPI00412368 | K | 136  |
| IPI00412368 | K | 138  |
| IPI00412368 | K | 156  |
| IPI00412368 | K | 157  |
| IPI00412404 | K | 99   |
| IPI00412404 | K | 220  |
| IPI00412415 | K | 973  |
| IPI00412441 | K | 253  |
| IPI00412441 | K | 689  |
| IPI00412579 | K | 62   |
| IPI00412579 | K | 106  |
| IPI00412579 | K | 118  |
| IPI00412607 | K | 13   |
| IPI00412607 | K | 14   |
| IPI00412607 | K | 19   |
| IPI00412607 | K | 43   |
| IPI00412672 | K | 454  |
| IPI00412741 | K | 197  |
| IPI00413022 | K | 482  |
| IPI00413108 | K | 52   |
| IPI00413265 | K | 548  |
| IPI00413324 | K | 74   |
| IPI00413344 | K | 19   |
| IPI00413344 | K | 92   |
| IPI00413344 | K | 96   |
| IPI00413365 | K | 1275 |
| IPI00413611 | K | 172  |
| IPI00413611 | K | 280  |
| IPI00413611 | K | 712  |
| IPI00413627 | K | 367  |
| IPI00413627 | K | 406  |
| IPI00413627 | K | 409  |
| IPI00413641 | K | 86   |
| IPI00413641 | K | 95   |
| IPI00413641 | K | 222  |
| IPI00413641 | K | 263  |
| IPI00413730 | K | 418  |
| IPI00413778 | K | 90   |
| IPI00413880 | K | 1426 |

Table S1

|             |   |     |
|-------------|---|-----|
| IPI00414127 | K | 150 |
| IPI00414127 | K | 183 |
| IPI00414320 | K | 348 |
| IPI00414320 | K | 355 |
| IPI00414320 | K | 579 |
| IPI00414463 | K | 204 |
| IPI00414629 | K | 24  |
| IPI00414676 | K | 275 |
| IPI00414676 | K | 284 |
| IPI00414676 | K | 306 |
| IPI00414676 | K | 354 |
| IPI00414676 | K | 399 |
| IPI00414676 | K | 402 |
| IPI00414676 | K | 435 |
| IPI00414676 | K | 481 |
| IPI00414676 | K | 568 |
| IPI00414676 | K | 573 |
| IPI00414676 | K | 623 |
| IPI00414676 | K | 624 |
| IPI00414717 | K | 747 |
| IPI00414872 | K | 698 |
| IPI00414973 | K | 507 |
| IPI00418169 | K | 122 |
| IPI00418169 | K | 133 |
| IPI00418169 | K | 166 |
| IPI00418169 | K | 170 |
| IPI00418169 | K | 175 |
| IPI00418169 | K | 194 |
| IPI00418169 | K | 245 |
| IPI00418169 | K | 297 |
| IPI00418169 | K | 299 |
| IPI00418169 | K | 320 |
| IPI00418169 | K | 331 |
| IPI00418174 | K | 40  |
| IPI00418213 | K | 329 |
| IPI00418213 | K | 348 |
| IPI00418238 | K | 7   |
| IPI00418238 | K | 173 |
| IPI00418262 | K | 234 |
| IPI00418313 | K | 81  |
| IPI00418313 | K | 100 |
| IPI00418313 | K | 214 |
| IPI00418313 | K | 460 |
| IPI00418316 | K | 440 |
| IPI00418471 | K | 104 |
| IPI00418471 | K | 120 |
| IPI00418471 | K | 139 |
| IPI00418471 | K | 235 |
| IPI00418471 | K | 236 |
| IPI00418471 | K | 292 |
| IPI00418471 | K | 373 |
| IPI00418471 | K | 445 |

Table S1

|             |   |     |
|-------------|---|-----|
| IPI00419235 | K | 137 |
| IPI00419237 | K | 221 |
| IPI00419249 | K | 57  |
| IPI00419249 | K | 110 |
| IPI00419249 | K | 206 |
| IPI00419249 | K | 230 |
| IPI00419249 | K | 238 |
| IPI00419258 | K | 3   |
| IPI00419258 | K | 12  |
| IPI00419258 | K | 29  |
| IPI00419258 | K | 30  |
| IPI00419258 | K | 43  |
| IPI00419258 | K | 44  |
| IPI00419258 | K | 59  |
| IPI00419258 | K | 82  |
| IPI00419258 | K | 146 |
| IPI00419258 | K | 147 |
| IPI00419258 | K | 154 |
| IPI00419258 | K | 157 |
| IPI00419273 | K | 555 |
| IPI00419273 | K | 641 |
| IPI00419373 | K | 29  |
| IPI00419373 | K | 134 |
| IPI00419373 | K | 148 |
| IPI00419373 | K | 151 |
| IPI00419541 | K | 404 |
| IPI00419585 | K | 28  |
| IPI00419585 | K | 44  |
| IPI00419585 | K | 49  |
| IPI00419585 | K | 76  |
| IPI00419585 | K | 82  |
| IPI00419585 | K | 118 |
| IPI00419585 | K | 125 |
| IPI00419585 | K | 131 |
| IPI00419643 | K | 221 |
| IPI00419802 | K | 92  |
| IPI00419802 | K | 353 |
| IPI00419833 | K | 6   |
| IPI00419833 | K | 12  |
| IPI00419833 | K | 13  |
| IPI00419833 | K | 16  |
| IPI00419833 | K | 21  |
| IPI00419833 | K | 109 |
| IPI00419844 | K | 428 |
| IPI00419880 | K | 27  |
| IPI00419880 | K | 34  |
| IPI00419880 | K | 144 |
| IPI00419880 | K | 145 |
| IPI00419880 | K | 249 |
| IPI00419884 | K | 10  |
| IPI00419884 | K | 15  |
| IPI00419919 | K | 33  |

Table S1

|             |   |      |
|-------------|---|------|
| IPI00419919 | K | 82   |
| IPI00419928 | K | 110  |
| IPI00419979 | K | 38   |
| IPI00419979 | K | 128  |
| IPI00419979 | K | 502  |
| IPI00420014 | K | 469  |
| IPI00420014 | K | 971  |
| IPI00420014 | K | 1176 |
| IPI00420065 | K | 378  |
| IPI00420065 | K | 385  |
| IPI00420071 | K | 396  |
| IPI00420071 | K | 398  |
| IPI00420108 | K | 267  |
| IPI00420108 | K | 272  |
| IPI00428484 | K | 153  |
| IPI00430411 | K | 190  |
| IPI00430472 | K | 572  |
| IPI00430803 | K | 134  |
| IPI00430803 | K | 135  |
| IPI00430812 | K | 103  |
| IPI00433834 | K | 77   |
| IPI00436632 | K | 1247 |
| IPI00436748 | K | 208  |
| IPI00438229 | K | 266  |
| IPI00438229 | K | 304  |
| IPI00438229 | K | 340  |
| IPI00438229 | K | 377  |
| IPI00438229 | K | 770  |
| IPI00438229 | K | 774  |
| IPI00438701 | K | 422  |
| IPI00439194 | K | 4    |
| IPI00439194 | K | 109  |
| IPI00439194 | K | 141  |
| IPI00439548 | K | 392  |
| IPI00440484 | K | 1096 |
| IPI00440493 | K | 132  |
| IPI00440493 | K | 161  |
| IPI00440493 | K | 230  |
| IPI00440493 | K | 239  |
| IPI00440493 | K | 240  |
| IPI00440493 | K | 261  |
| IPI00440493 | K | 305  |
| IPI00440493 | K | 427  |
| IPI00440493 | K | 434  |
| IPI00440493 | K | 498  |
| IPI00440493 | K | 506  |
| IPI00440493 | K | 531  |
| IPI00440493 | K | 539  |
| IPI00440502 | K | 10   |
| IPI00440502 | K | 31   |
| IPI00440703 | K | 71   |
| IPI00440703 | K | 225  |

Table S1

|             |   |      |
|-------------|---|------|
| IPI00440727 | K | 1111 |
| IPI00440727 | K | 1114 |
| IPI00441344 | K | 493  |
| IPI00441473 | K | 200  |
| IPI00442073 | K | 108  |
| IPI00442073 | K | 112  |
| IPI00442073 | K | 131  |
| IPI00442997 | K | 59   |
| IPI00442997 | K | 69   |
| IPI00444452 | K | 148  |
| IPI00444646 | K | 647  |
| IPI00444646 | K | 878  |
| IPI00446767 | K | 237  |
| IPI00446767 | K | 281  |
| IPI00446986 | K | 3    |
| IPI00446986 | K | 149  |
| IPI00446986 | K | 265  |
| IPI00446986 | K | 425  |
| IPI00448465 | K | 39   |
| IPI00448798 | K | 8    |
| IPI00449049 | K | 97   |
| IPI00449049 | K | 105  |
| IPI00449049 | K | 131  |
| IPI00449049 | K | 498  |
| IPI00449049 | K | 505  |
| IPI00449049 | K | 508  |
| IPI00449049 | K | 521  |
| IPI00449049 | K | 524  |
| IPI00449049 | K | 548  |
| IPI00449049 | K | 551  |
| IPI00449049 | K | 600  |
| IPI00449049 | K | 621  |
| IPI00449197 | K | 13   |
| IPI00449197 | K | 352  |
| IPI00449923 | K | 774  |
| IPI00449923 | K | 1083 |
| IPI00450472 | K | 65   |
| IPI00451401 | K | 14   |
| IPI00451401 | K | 156  |
| IPI00452463 | K | 663  |
| IPI00452463 | K | 664  |
| IPI00453473 | K | 6    |
| IPI00453473 | K | 9    |
| IPI00453473 | K | 13   |
| IPI00453473 | K | 17   |
| IPI00453473 | K | 21   |
| IPI00453473 | K | 32   |
| IPI00453473 | K | 60   |
| IPI00453473 | K | 92   |
| IPI00453474 | K | 19   |
| IPI00453474 | K | 25   |
| IPI00454695 | K | 6    |

Table S1

|             |   |      |
|-------------|---|------|
| IPI00454695 | K | 12   |
| IPI00454695 | K | 13   |
| IPI00455210 | K | 115  |
| IPI00455210 | K | 116  |
| IPI00455210 | K | 273  |
| IPI00455210 | K | 275  |
| IPI00455210 | K | 285  |
| IPI00455210 | K | 304  |
| IPI00455210 | K | 884  |
| IPI00455210 | K | 987  |
| IPI00455210 | K | 1671 |
| IPI00455268 | K | 344  |
| IPI00455268 | K | 348  |
| IPI00455423 | K | 146  |
| IPI00455518 | K | 767  |
| IPI00455620 | K | 181  |
| IPI00455623 | K | 136  |
| IPI00456363 | K | 348  |
| IPI00456429 | K | 88   |
| IPI00456429 | K | 93   |
| IPI00456620 | K | 902  |
| IPI00456635 | K | 511  |
| IPI00456758 | K | 47   |
| IPI00456758 | K | 55   |
| IPI00456758 | K | 110  |
| IPI00456887 | K | 471  |
| IPI00456887 | K | 553  |
| IPI00456887 | K | 571  |
| IPI00456919 | K | 509  |
| IPI00456919 | K | 1840 |
| IPI00456919 | K | 2248 |
| IPI00456969 | K | 371  |
| IPI00456969 | K | 394  |
| IPI00456969 | K | 754  |
| IPI00456969 | K | 1125 |
| IPI00456969 | K | 1286 |
| IPI00456969 | K | 3480 |
| IPI00456969 | K | 4283 |
| IPI00456970 | K | 556  |
| IPI00457284 | K | 1142 |
| IPI00464979 | K | 78   |
| IPI00464979 | K | 143  |
| IPI00465028 | K | 51   |
| IPI00465028 | K | 225  |
| IPI00465028 | K | 231  |
| IPI00465028 | K | 275  |
| IPI00465044 | K | 92   |
| IPI00465044 | K | 293  |
| IPI00465044 | K | 377  |
| IPI00465070 | K | 10   |
| IPI00465070 | K | 15   |
| IPI00465070 | K | 19   |

Table S1

|             |   |     |
|-------------|---|-----|
| IPI00465070 | K | 24  |
| IPI00465070 | K | 28  |
| IPI00465070 | K | 37  |
| IPI00465070 | K | 57  |
| IPI00465070 | K | 80  |
| IPI00465070 | K | 116 |
| IPI00465070 | K | 123 |
| IPI00465084 | K | 240 |
| IPI00465084 | K | 241 |
| IPI00465170 | K | 248 |
| IPI00465222 | K | 234 |
| IPI00465222 | K | 235 |
| IPI00465233 | K | 480 |
| IPI00465233 | K | 488 |
| IPI00465233 | K | 508 |
| IPI00465233 | K | 592 |
| IPI00465248 | K | 5   |
| IPI00465248 | K | 60  |
| IPI00465248 | K | 64  |
| IPI00465248 | K | 71  |
| IPI00465248 | K | 80  |
| IPI00465248 | K | 81  |
| IPI00465248 | K | 89  |
| IPI00465248 | K | 126 |
| IPI00465248 | K | 193 |
| IPI00465248 | K | 197 |
| IPI00465248 | K | 199 |
| IPI00465248 | K | 202 |
| IPI00465248 | K | 221 |
| IPI00465248 | K | 228 |
| IPI00465248 | K | 233 |
| IPI00465248 | K | 256 |
| IPI00465248 | K | 281 |
| IPI00465248 | K | 285 |
| IPI00465248 | K | 306 |
| IPI00465248 | K | 326 |
| IPI00465248 | K | 343 |
| IPI00465248 | K | 406 |
| IPI00465248 | K | 420 |
| IPI00465256 | K | 34  |
| IPI00465256 | K | 189 |
| IPI00465256 | K | 190 |
| IPI00465275 | K | 405 |
| IPI00465294 | K | 626 |
| IPI00465315 | K | 100 |
| IPI00465345 | K | 170 |
| IPI00465345 | K | 585 |
| IPI00465361 | K | 16  |
| IPI00465361 | K | 174 |
| IPI00465361 | K | 177 |
| IPI00465363 | K | 7   |
| IPI00465363 | K | 13  |

Table S1

|             |   |      |
|-------------|---|------|
| IPI00465363 | K | 14   |
| IPI00465363 | K | 17   |
| IPI00465363 | K | 18   |
| IPI00465363 | K | 22   |
| IPI00465363 | K | 25   |
| IPI00465363 | K | 110  |
| IPI00465363 | K | 122  |
| IPI00465373 | K | 108  |
| IPI00465373 | K | 116  |
| IPI00465428 | K | 3538 |
| IPI00465436 | K | 237  |
| IPI00465436 | K | 476  |
| IPI00465439 | K | 13   |
| IPI00465439 | K | 42   |
| IPI00465439 | K | 108  |
| IPI00465439 | K | 147  |
| IPI00465439 | K | 230  |
| IPI00465439 | K | 330  |
| IPI00470416 | K | 220  |
| IPI00470502 | K | 53   |
| IPI00470502 | K | 231  |
| IPI00470502 | K | 239  |
| IPI00470502 | K | 240  |
| IPI00470502 | K | 276  |
| IPI00470502 | K | 291  |
| IPI00470528 | K | 83   |
| IPI00470528 | K | 153  |
| IPI00470528 | K | 157  |
| IPI00470573 | K | 327  |
| IPI00470779 | K | 194  |
| IPI00470779 | K | 195  |
| IPI00470811 | K | 11   |
| IPI00470883 | K | 607  |
| IPI00470891 | K | 81   |
| IPI00470891 | K | 434  |
| IPI00472160 | K | 447  |
| IPI00472724 | K | 41   |
| IPI00472724 | K | 44   |
| IPI00472724 | K | 172  |
| IPI00472724 | K | 179  |
| IPI00472724 | K | 318  |
| IPI00472724 | K | 392  |
| IPI00472724 | K | 395  |
| IPI00472782 | K | 435  |
| IPI00472939 | K | 169  |
| IPI00472939 | K | 191  |
| IPI00473014 | K | 19   |
| IPI00473014 | K | 112  |
| IPI00473014 | K | 114  |
| IPI00473047 | K | 273  |
| IPI00473136 | K | 181  |
| IPI00473136 | K | 186  |



Table S1

|             |   |      |
|-------------|---|------|
| IPI00473136 | K | 866  |
| IPI00477040 | K | 38   |
| IPI00477259 | K | 93   |
| IPI00477313 | K | 39   |
| IPI00477313 | K | 50   |
| IPI00477313 | K | 170  |
| IPI00477313 | K | 216  |
| IPI00477495 | K | 6    |
| IPI00477495 | K | 12   |
| IPI00477495 | K | 13   |
| IPI00477495 | K | 16   |
| IPI00477495 | K | 21   |
| IPI00477495 | K | 109  |
| IPI00477505 | K | 106  |
| IPI00477526 | K | 171  |
| IPI00477535 | K | 8    |
| IPI00477686 | K | 22   |
| IPI00477686 | K | 33   |
| IPI00477686 | K | 137  |
| IPI00477923 | K | 636  |
| IPI00477923 | K | 786  |
| IPI00477971 | K | 26   |
| IPI00478003 | K | 1162 |
| IPI00478410 | K | 55   |
| IPI00478410 | K | 79   |
| IPI00478410 | K | 90   |
| IPI00478410 | K | 115  |
| IPI00478410 | K | 154  |
| IPI00478410 | K | 197  |
| IPI00478718 | K | 28   |
| IPI00478758 | K | 61   |
| IPI00478772 | K | 17   |
| IPI00479125 | K | 226  |
| IPI00479125 | K | 227  |
| IPI00479125 | K | 230  |
| IPI00479125 | K | 232  |
| IPI00479125 | K | 234  |
| IPI00479145 | K | 97   |
| IPI00479186 | K | 62   |
| IPI00479186 | K | 89   |
| IPI00479186 | K | 135  |
| IPI00479186 | K | 166  |
| IPI00479186 | K | 266  |
| IPI00479186 | K | 305  |
| IPI00479186 | K | 433  |
| IPI00479191 | K | 167  |
| IPI00479262 | K | 1096 |
| IPI00479262 | K | 1189 |
| IPI00479385 | K | 583  |
| IPI00479545 | K | 470  |
| IPI00479545 | K | 895  |
| IPI00479571 | K | 31   |

Table S1

|             |   |      |
|-------------|---|------|
| IPI00479571 | K | 33   |
| IPI00479571 | K | 35   |
| IPI00479786 | K | 87   |
| IPI00479789 | K | 290  |
| IPI00479877 | K | 322  |
| IPI00479997 | K | 9    |
| IPI00479997 | K | 80   |
| IPI00479997 | K | 95   |
| IPI00479997 | K | 100  |
| IPI00479997 | K | 119  |
| IPI00479997 | K | 128  |
| IPI00480159 | K | 1120 |
| IPI00513768 | K | 320  |
| IPI00513791 | K | 1962 |
| IPI00513827 | K | 245  |
| IPI00513827 | K | 312  |
| IPI00513827 | K | 334  |
| IPI00514053 | K | 233  |
| IPI00514053 | K | 309  |
| IPI00514053 | K | 351  |
| IPI00514587 | K | 323  |
| IPI00514648 | K | 604  |
| IPI00514648 | K | 994  |
| IPI00514648 | K | 996  |
| IPI00514648 | K | 997  |
| IPI00514648 | K | 999  |
| IPI00514648 | K | 1543 |
| IPI00514648 | K | 1547 |
| IPI00514648 | K | 1551 |
| IPI00514648 | K | 1553 |
| IPI00514648 | K | 1555 |
| IPI00514983 | K | 274  |
| IPI00515061 | K | 6    |
| IPI00515061 | K | 12   |
| IPI00515061 | K | 13   |
| IPI00515097 | K | 179  |
| IPI00549171 | K | 33   |
| IPI00549171 | K | 276  |
| IPI00549189 | K | 229  |
| IPI00549189 | K | 230  |
| IPI00549189 | K | 257  |
| IPI00549189 | K | 538  |
| IPI00549205 | K | 270  |
| IPI00549205 | K | 965  |
| IPI00549205 | K | 1291 |
| IPI00549232 | K | 384  |
| IPI00549248 | K | 27   |
| IPI00549248 | K | 32   |
| IPI00549248 | K | 141  |
| IPI00549248 | K | 150  |
| IPI00549248 | K | 154  |
| IPI00549248 | K | 212  |

Table S1

|             |   |     |
|-------------|---|-----|
| IPI00549248 | K | 215 |
| IPI00549248 | K | 229 |
| IPI00549248 | K | 230 |
| IPI00549248 | K | 257 |
| IPI00549248 | K | 267 |
| IPI00549248 | K | 273 |
| IPI00549248 | K | 292 |
| IPI00549357 | K | 272 |
| IPI00549664 | K | 889 |
| IPI00549666 | K | 142 |
| IPI00549672 | K | 298 |
| IPI00549725 | K | 5   |
| IPI00549725 | K | 100 |
| IPI00549725 | K | 106 |
| IPI00549725 | K | 113 |
| IPI00549725 | K | 176 |
| IPI00549730 | K | 206 |
| IPI00549730 | K | 208 |
| IPI00549955 | K | 377 |
| IPI00550020 | K | 4   |
| IPI00550020 | K | 15  |
| IPI00550020 | K | 92  |
| IPI00550021 | K | 294 |
| IPI00550021 | K | 366 |
| IPI00550021 | K | 373 |
| IPI00550243 | K | 26  |
| IPI00550308 | K | 451 |
| IPI00550363 | K | 17  |
| IPI00550363 | K | 20  |
| IPI00550364 | K | 492 |
| IPI00550451 | K | 147 |
| IPI00550655 | K | 7   |
| IPI00550689 | K | 496 |
| IPI00550703 | K | 750 |
| IPI00550703 | K | 754 |
| IPI00550746 | K | 239 |
| IPI00550900 | K | 93  |
| IPI00550917 | K | 14  |
| IPI00550917 | K | 19  |
| IPI00550991 | K | 260 |
| IPI00550991 | K | 261 |
| IPI00550991 | K | 262 |
| IPI00550991 | K | 441 |
| IPI00550991 | K | 446 |
| IPI00552413 | K | 161 |
| IPI00552413 | K | 166 |
| IPI00552440 | K | 126 |
| IPI00552701 | K | 797 |
| IPI00552873 | K | 6   |
| IPI00552873 | K | 10  |
| IPI00552873 | K | 119 |
| IPI00552897 | K | 812 |

Table S1

|             |   |      |
|-------------|---|------|
| IPI00552897 | K | 1402 |
| IPI00552978 | K | 607  |
| IPI00553153 | K | 83   |
| IPI00553153 | K | 84   |
| IPI00553164 | K | 52   |
| IPI00553164 | K | 89   |
| IPI00553185 | K | 222  |
| IPI00553185 | K | 248  |
| IPI00553214 | K | 13   |
| IPI00554436 | K | 605  |
| IPI00554560 | K | 442  |
| IPI00554579 | K | 443  |
| IPI00554648 | K | 11   |
| IPI00554648 | K | 101  |
| IPI00554648 | K | 117  |
| IPI00554648 | K | 122  |
| IPI00554648 | K | 207  |
| IPI00554648 | K | 295  |
| IPI00554648 | K | 325  |
| IPI00554648 | K | 347  |
| IPI00554648 | K | 393  |
| IPI00554648 | K | 472  |
| IPI00554648 | K | 483  |
| IPI00554652 | K | 455  |
| IPI00554681 | K | 30   |
| IPI00554681 | K | 46   |
| IPI00554681 | K | 60   |
| IPI00554681 | K | 98   |
| IPI00554723 | K | 121  |
| IPI00554723 | K | 208  |
| IPI00554737 | K | 280  |
| IPI00554761 | K | 3    |
| IPI00554761 | K | 5    |
| IPI00554761 | K | 14   |
| IPI00554761 | K | 18   |
| IPI00554761 | K | 27   |
| IPI00554761 | K | 31   |
| IPI00554761 | K | 37   |
| IPI00554761 | K | 42   |
| IPI00554761 | K | 48   |
| IPI00554761 | K | 53   |
| IPI00554761 | K | 55   |
| IPI00554761 | K | 59   |
| IPI00554761 | K | 61   |
| IPI00554761 | K | 82   |
| IPI00554777 | K | 385  |
| IPI00554788 | K | 81   |
| IPI00554788 | K | 111  |
| IPI00554788 | K | 131  |
| IPI00554788 | K | 167  |
| IPI00554788 | K | 187  |
| IPI00554788 | K | 214  |

Table S1

|             |   |     |
|-------------|---|-----|
| IPI00554788 | K | 426 |
| IPI00554798 | K | 6   |
| IPI00554798 | K | 12  |
| IPI00554798 | K | 13  |
| IPI00554798 | K | 16  |
| IPI00554798 | K | 17  |
| IPI00554798 | K | 21  |
| IPI00554798 | K | 24  |
| IPI00554798 | K | 109 |
| IPI00554798 | K | 121 |
| IPI00554811 | K | 35  |
| IPI00554811 | K | 89  |
| IPI00555719 | K | 136 |
| IPI00555744 | K | 71  |
| IPI00555744 | K | 79  |
| IPI00555744 | K | 85  |
| IPI00555876 | K | 266 |
| IPI00555876 | K | 267 |
| IPI00555902 | K | 41  |
| IPI00556027 | K | 319 |
| IPI00556365 | K | 503 |
| IPI00556369 | K | 173 |
| IPI00556553 | K | 217 |
| IPI00556553 | K | 252 |
| IPI00604400 | K | 324 |
| IPI00604590 | K | 37  |
| IPI00604590 | K | 81  |
| IPI00604590 | K | 125 |
| IPI00604590 | K | 189 |
| IPI00604590 | K | 196 |
| IPI00604590 | K | 225 |
| IPI00604590 | K | 264 |
| IPI00604590 | K | 268 |
| IPI00604620 | K | 9   |
| IPI00604620 | K | 15  |
| IPI00604620 | K | 79  |
| IPI00604620 | K | 102 |
| IPI00604620 | K | 109 |
| IPI00604620 | K | 116 |
| IPI00604620 | K | 124 |
| IPI00604620 | K | 132 |
| IPI00604620 | K | 318 |
| IPI00604620 | K | 333 |
| IPI00604620 | K | 370 |
| IPI00604620 | K | 377 |
| IPI00604620 | K | 398 |
| IPI00604620 | K | 403 |
| IPI00604620 | K | 444 |
| IPI00604620 | K | 449 |
| IPI00604620 | K | 467 |
| IPI00604620 | K | 513 |
| IPI00604620 | K | 572 |

Table S1

|             |   |      |
|-------------|---|------|
| IPI00604620 | K | 577  |
| IPI00604620 | K | 646  |
| IPI00604624 | K | 109  |
| IPI00604756 | K | 134  |
| IPI00607554 | K | 122  |
| IPI00607584 | K | 71   |
| IPI00607584 | K | 158  |
| IPI00607584 | K | 1317 |
| IPI00607591 | K | 230  |
| IPI00607591 | K | 421  |
| IPI00607708 | K | 5    |
| IPI00607708 | K | 14   |
| IPI00607708 | K | 22   |
| IPI00607708 | K | 57   |
| IPI00607708 | K | 81   |
| IPI00607708 | K | 118  |
| IPI00607708 | K | 126  |
| IPI00607708 | K | 222  |
| IPI00607708 | K | 278  |
| IPI00607708 | K | 318  |
| IPI00607799 | K | 48   |
| IPI00607799 | K | 151  |
| IPI00639841 | K | 51   |
| IPI00639841 | K | 62   |
| IPI00639841 | K | 92   |
| IPI00640088 | K | 231  |
| IPI00640136 | K | 704  |
| IPI00640703 | K | 396  |
| IPI00641026 | K | 63   |
| IPI00641109 | K | 647  |
| IPI00641384 | K | 622  |
| IPI00641436 | K | 604  |
| IPI00641743 | K | 288  |
| IPI00641743 | K | 813  |
| IPI00641743 | K | 836  |
| IPI00641743 | K | 2050 |
| IPI00641743 | K | 2073 |
| IPI00641743 | K | 2074 |
| IPI00641788 | K | 73   |
| IPI00641829 | K | 36   |
| IPI00641829 | K | 53   |
| IPI00641829 | K | 203  |
| IPI00641829 | K | 349  |
| IPI00641924 | K | 287  |
| IPI00642097 | K | 237  |
| IPI00642097 | K | 325  |
| IPI00642097 | K | 619  |
| IPI00642097 | K | 622  |
| IPI00642156 | K | 486  |
| IPI00642186 | K | 951  |
| IPI00642211 | K | 454  |
| IPI00642238 | K | 190  |

Table S1

|             |   |      |
|-------------|---|------|
| IPI00642329 | K | 36   |
| IPI00642329 | K | 243  |
| IPI00642374 | K | 170  |
| IPI00642550 | K | 649  |
| IPI00642816 | K | 30   |
| IPI00642816 | K | 52   |
| IPI00642904 | K | 104  |
| IPI00642971 | K | 383  |
| IPI00642971 | K | 473  |
| IPI00642971 | K | 483  |
| IPI00643027 | K | 892  |
| IPI00643027 | K | 1010 |
| IPI00643027 | K | 1017 |
| IPI00643041 | K | 60   |
| IPI00643041 | K | 71   |
| IPI00643041 | K | 99   |
| IPI00643041 | K | 159  |
| IPI00643435 | K | 183  |
| IPI00643435 | K | 539  |
| IPI00643435 | K | 543  |
| IPI00643465 | K | 2884 |
| IPI00643591 | K | 101  |
| IPI00643591 | K | 167  |
| IPI00643722 | K | 997  |
| IPI00643722 | K | 1007 |
| IPI00643722 | K | 1612 |
| IPI00643722 | K | 1905 |
| IPI00643920 | K | 6    |
| IPI00643920 | K | 11   |
| IPI00643920 | K | 144  |
| IPI00644055 | K | 103  |
| IPI00644055 | K | 369  |
| IPI00644055 | K | 392  |
| IPI00644055 | K | 400  |
| IPI00644127 | K | 844  |
| IPI00644127 | K | 848  |
| IPI00644231 | K | 1197 |
| IPI00644648 | K | 779  |
| IPI00644708 | K | 139  |
| IPI00644712 | K | 31   |
| IPI00644712 | K | 282  |
| IPI00644712 | K | 317  |
| IPI00644712 | K | 331  |
| IPI00644712 | K | 338  |
| IPI00644712 | K | 461  |
| IPI00644712 | K | 468  |
| IPI00644712 | K | 539  |
| IPI00644712 | K | 542  |
| IPI00644712 | K | 544  |
| IPI00644712 | K | 553  |
| IPI00644712 | K | 556  |
| IPI00645078 | K | 89   |

Table S1

|             |   |      |
|-------------|---|------|
| IPI00645078 | K | 671  |
| IPI00645078 | K | 980  |
| IPI00645078 | K | 984  |
| IPI00645192 | K | 461  |
| IPI00645446 | K | 52   |
| IPI00645446 | K | 100  |
| IPI00645446 | K | 104  |
| IPI00645616 | K | 507  |
| IPI00645616 | K | 530  |
| IPI00645643 | K | 398  |
| IPI00645805 | K | 75   |
| IPI00645947 | K | 811  |
| IPI00646058 | K | 475  |
| IPI00646058 | K | 607  |
| IPI00646304 | K | 98   |
| IPI00646304 | K | 165  |
| IPI00646304 | K | 209  |
| IPI00646350 | K | 6    |
| IPI00646361 | K | 143  |
| IPI00646377 | K | 944  |
| IPI00646645 | K | 1647 |
| IPI00646689 | K | 78   |
| IPI00646762 | K | 42   |
| IPI00646762 | K | 223  |
| IPI00646762 | K | 231  |
| IPI00646839 | K | 559  |
| IPI00646909 | K | 370  |
| IPI00646909 | K | 394  |
| IPI00646909 | K | 401  |
| IPI00646917 | K | 23   |
| IPI00646917 | K | 29   |
| IPI00646917 | K | 56   |
| IPI00646917 | K | 73   |
| IPI00646917 | K | 189  |
| IPI00647217 | K | 51   |
| IPI00647217 | K | 78   |
| IPI00647217 | K | 79   |
| IPI00647217 | K | 198  |
| IPI00647217 | K | 379  |
| IPI00647217 | K | 748  |
| IPI00647217 | K | 796  |
| IPI00647491 | K | 512  |
| IPI00647915 | K | 38   |
| IPI00647915 | K | 41   |
| IPI00651737 | K | 135  |
| IPI00654555 | K | 91   |
| IPI00654555 | K | 682  |
| IPI00654731 | K | 858  |
| IPI00654731 | K | 909  |
| IPI00654755 | K | 145  |
| IPI00654777 | K | 253  |
| IPI00655631 | K | 1033 |



Table S1

|             |   |      |
|-------------|---|------|
| IPI00655650 | K | 66   |
| IPI00655650 | K | 70   |
| IPI00655650 | K | 113  |
| IPI00656021 | K | 110  |
| IPI00656021 | K | 360  |
| IPI00657642 | K | 127  |
| IPI00657682 | K | 87   |
| IPI00657687 | K | 371  |
| IPI00657967 | K | 52   |
| IPI00658023 | K | 198  |
| IPI00658023 | K | 199  |
| IPI00658023 | K | 280  |
| IPI00658210 | K | 121  |
| IPI00658210 | K | 214  |
| IPI00658210 | K | 578  |
| IPI00658210 | K | 581  |
| IPI00718888 | K | 179  |
| IPI00719285 | K | 1763 |
| IPI00719680 | K | 176  |
| IPI00719680 | K | 736  |
| IPI00719752 | K | 209  |
| IPI00719752 | K | 213  |
| IPI00719752 | K | 288  |
| IPI00719752 | K | 364  |
| IPI00719752 | K | 436  |
| IPI00719752 | K | 729  |
| IPI00737057 | K | 1024 |
| IPI00738216 | K | 1218 |
| IPI00738216 | K | 2147 |
| IPI00739119 | K | 171  |
| IPI00739386 | K | 1365 |
| IPI00740057 | K | 1773 |
| IPI00740961 | K | 175  |
| IPI00742682 | K | 252  |
| IPI00742682 | K | 312  |
| IPI00742682 | K | 315  |
| IPI00742682 | K | 345  |
| IPI00742682 | K | 428  |
| IPI00742682 | K | 457  |
| IPI00742682 | K | 713  |
| IPI00742682 | K | 723  |
| IPI00742682 | K | 748  |
| IPI00742682 | K | 755  |
| IPI00742743 | K | 1672 |
| IPI00743143 | K | 112  |
| IPI00743143 | K | 127  |
| IPI00743143 | K | 129  |
| IPI00743143 | K | 130  |
| IPI00743143 | K | 131  |
| IPI00743143 | K | 146  |
| IPI00743143 | K | 148  |
| IPI00743143 | K | 156  |

Table S1

|             |   |      |
|-------------|---|------|
| IPI00743143 | K | 160  |
| IPI00743143 | K | 161  |
| IPI00743143 | K | 236  |
| IPI00743157 | K | 790  |
| IPI00743335 | K | 285  |
| IPI00743335 | K | 647  |
| IPI00743335 | K | 704  |
| IPI00743509 | K | 168  |
| IPI00743509 | K | 171  |
| IPI00743509 | K | 176  |
| IPI00743594 | K | 372  |
| IPI00743813 | K | 1903 |
| IPI00743879 | K | 409  |
| IPI00744211 | K | 134  |
| IPI00744507 | K | 102  |
| IPI00744692 | K | 219  |
| IPI00744692 | K | 269  |
| IPI00744692 | K | 286  |
| IPI00744692 | K | 321  |
| IPI00744711 | K | 264  |
| IPI00744711 | K | 275  |
| IPI00744711 | K | 285  |
| IPI00744711 | K | 289  |
| IPI00744711 | K | 591  |
| IPI00744810 | K | 108  |
| IPI00744851 | K | 15   |
| IPI00744858 | K | 127  |
| IPI00745087 | K | 200  |
| IPI00745266 | K | 437  |
| IPI00745266 | K | 465  |
| IPI00745266 | K | 549  |
| IPI00745568 | K | 106  |
| IPI00745568 | K | 207  |
| IPI00745793 | K | 73   |
| IPI00745872 | K | 223  |
| IPI00745872 | K | 229  |
| IPI00745872 | K | 438  |
| IPI00745872 | K | 499  |
| IPI00746165 | K | 28   |
| IPI00746165 | K | 81   |
| IPI00746165 | K | 95   |
| IPI00746165 | K | 115  |
| IPI00746165 | K | 180  |
| IPI00746165 | K | 182  |
| IPI00746165 | K | 480  |
| IPI00746251 | K | 6    |
| IPI00746251 | K | 12   |
| IPI00746251 | K | 13   |
| IPI00746310 | K | 7    |
| IPI00746310 | K | 15   |
| IPI00746310 | K | 18   |
| IPI00746310 | K | 23   |

Table S1

|             |   |      |
|-------------|---|------|
| IPI00746310 | K | 31   |
| IPI00746310 | K | 46   |
| IPI00746310 | K | 55   |
| IPI00746310 | K | 62   |
| IPI00746310 | K | 65   |
| IPI00746337 | K | 210  |
| IPI00746351 | K | 18   |
| IPI00746351 | K | 922  |
| IPI00746398 | K | 274  |
| IPI00746412 | K | 1392 |
| IPI00746655 | K | 689  |
| IPI00746655 | K | 827  |
| IPI00746684 | K | 818  |
| IPI00746777 | K | 366  |
| IPI00746934 | K | 1084 |
| IPI00747327 | K | 408  |
| IPI00747478 | K | 203  |
| IPI00747810 | K | 471  |
| IPI00747913 | K | 47   |
| IPI00748037 | K | 203  |
| IPI00748360 | K | 819  |
| IPI00748532 | K | 616  |
| IPI00748532 | K | 619  |
| IPI00748532 | K | 620  |
| IPI00749113 | K | 179  |
| IPI00749237 | K | 14   |
| IPI00749245 | K | 223  |
| IPI00749245 | K | 224  |
| IPI00749245 | K | 231  |
| IPI00749245 | K | 239  |
| IPI00749406 | K | 4    |
| IPI00749406 | K | 10   |
| IPI00759562 | K | 132  |
| IPI00759562 | K | 235  |
| IPI00759691 | K | 496  |
| IPI00759749 | K | 503  |
| IPI00761080 | K | 154  |
| IPI00761160 | K | 712  |
| IPI00782935 | K | 114  |
| IPI00782935 | K | 154  |
| IPI00782935 | K | 226  |
| IPI00782950 | K | 614  |
| IPI00782966 | K | 1350 |
| IPI00782966 | K | 1351 |
| IPI00782966 | K | 1352 |
| IPI00782966 | K | 1358 |
| IPI00782992 | K | 37   |
| IPI00782992 | K | 169  |
| IPI00782992 | K | 1186 |
| IPI00782992 | K | 1467 |
| IPI00783004 | K | 943  |
| IPI00783004 | K | 945  |

Table S1

|             |   |     |
|-------------|---|-----|
| IPI00783017 | K | 412 |
| IPI00783017 | K | 417 |
| IPI00783097 | K | 204 |
| IPI00783097 | K | 219 |
| IPI00783097 | K | 309 |
| IPI00783097 | K | 501 |
| IPI00783271 | K | 155 |
| IPI00783271 | K | 187 |
| IPI00783271 | K | 292 |
| IPI00783271 | K | 613 |
| IPI00783271 | K | 726 |
| IPI00783271 | K | 750 |
| IPI00783271 | K | 864 |
| IPI00783302 | K | 126 |
| IPI00783359 | K | 55  |
| IPI00783502 | K | 228 |
| IPI00783559 | K | 454 |
| IPI00783781 | K | 41  |
| IPI00783781 | K | 44  |
| IPI00783835 | K | 305 |
| IPI00783835 | K | 308 |
| IPI00783874 | K | 179 |
| IPI00784090 | K | 7   |
| IPI00784090 | K | 20  |
| IPI00784090 | K | 318 |
| IPI00784090 | K | 400 |
| IPI00784090 | K | 466 |
| IPI00784154 | K | 31  |
| IPI00784154 | K | 82  |
| IPI00784154 | K | 87  |
| IPI00784154 | K | 125 |
| IPI00784154 | K | 130 |
| IPI00784154 | K | 156 |
| IPI00784154 | K | 157 |
| IPI00784154 | K | 191 |
| IPI00784154 | K | 202 |
| IPI00784154 | K | 218 |
| IPI00784154 | K | 233 |
| IPI00784154 | K | 236 |
| IPI00784154 | K | 249 |
| IPI00784154 | K | 250 |
| IPI00784154 | K | 269 |
| IPI00784154 | K | 352 |
| IPI00784154 | K | 359 |
| IPI00784154 | K | 389 |
| IPI00784154 | K | 396 |
| IPI00784154 | K | 462 |
| IPI00784154 | K | 469 |
| IPI00784154 | K | 473 |
| IPI00784154 | K | 523 |
| IPI00784154 | K | 551 |
| IPI00784154 | K | 554 |

Table S1

|             |   |      |
|-------------|---|------|
| IPI00784161 | K | 402  |
| IPI00784161 | K | 743  |
| IPI00784161 | K | 1676 |
| IPI00784224 | K | 317  |
| IPI00784224 | K | 509  |
| IPI00784224 | K | 910  |
| IPI00784366 | K | 265  |
| IPI00784366 | K | 318  |
| IPI00784414 | K | 49   |
| IPI00784414 | K | 87   |
| IPI00784414 | K | 685  |
| IPI00784473 | K | 3523 |
| IPI00784614 | K | 352  |
| IPI00784614 | K | 431  |
| IPI00785015 | K | 1148 |
| IPI00785110 | K | 880  |
| IPI00785113 | K | 568  |
| IPI00785113 | K | 570  |
| IPI00788907 | K | 116  |
| IPI00788907 | K | 144  |
| IPI00788907 | K | 191  |
| IPI00788925 | K | 44   |
| IPI00788925 | K | 47   |
| IPI00788925 | K | 322  |
| IPI00788925 | K | 378  |
| IPI00789041 | K | 238  |
| IPI00789101 | K | 37   |
| IPI00789101 | K | 39   |
| IPI00789159 | K | 108  |
| IPI00789442 | K | 488  |
| IPI00789551 | K | 3    |
| IPI00789551 | K | 473  |
| IPI00789551 | K | 522  |
| IPI00789551 | K | 524  |
| IPI00789551 | K | 571  |
| IPI00789551 | K | 877  |
| IPI00789551 | K | 879  |
| IPI00789551 | K | 884  |
| IPI00789605 | K | 50   |
| IPI00789605 | K | 81   |
| IPI00789618 | K | 25   |
| IPI00789618 | K | 97   |
| IPI00789618 | K | 123  |
| IPI00789699 | K | 1062 |
| IPI00789798 | K | 774  |
| IPI00789848 | K | 78   |
| IPI00789941 | K | 244  |
| IPI00789941 | K | 249  |
| IPI00789941 | K | 357  |
| IPI00790342 | K | 5    |
| IPI00790342 | K | 211  |
| IPI00790342 | K | 219  |

Table S1

|             |   |      |
|-------------|---|------|
| IPI00790342 | K | 240  |
| IPI00790503 | K | 442  |
| IPI00790503 | K | 552  |
| IPI00790503 | K | 1245 |
| IPI00790503 | K | 1268 |
| IPI00790503 | K | 1366 |
| IPI00790503 | K | 1666 |
| IPI00790644 | K | 78   |
| IPI00790739 | K | 50   |
| IPI00790739 | K | 598  |
| IPI00790739 | K | 630  |
| IPI00791537 | K | 1173 |
| IPI00791574 | K | 29   |
| IPI00792191 | K | 438  |
| IPI00792333 | K | 981  |
| IPI00792333 | K | 984  |
| IPI00792352 | K | 57   |
| IPI00792352 | K | 58   |
| IPI00792352 | K | 80   |
| IPI00792352 | K | 91   |
| IPI00792352 | K | 119  |
| IPI00792352 | K | 179  |
| IPI00792743 | K | 401  |
| IPI00792743 | K | 406  |
| IPI00792743 | K | 1024 |
| IPI00792788 | K | 818  |
| IPI00792984 | K | 45   |
| IPI00792984 | K | 50   |
| IPI00792984 | K | 128  |
| IPI00793199 | K | 215  |
| IPI00793199 | K | 227  |
| IPI00793199 | K | 295  |
| IPI00793199 | K | 302  |
| IPI00793201 | K | 57   |
| IPI00793375 | K | 173  |
| IPI00793375 | K | 174  |
| IPI00793375 | K | 347  |
| IPI00793696 | K | 77   |
| IPI00794402 | K | 186  |
| IPI00794402 | K | 223  |
| IPI00794461 | K | 6    |
| IPI00794461 | K | 12   |
| IPI00794461 | K | 13   |
| IPI00794461 | K | 16   |
| IPI00794461 | K | 17   |
| IPI00794461 | K | 21   |
| IPI00794461 | K | 109  |
| IPI00794461 | K | 121  |
| IPI00794779 | K | 990  |
| IPI00794806 | K | 253  |
| IPI00795015 | K | 943  |
| IPI00795015 | K | 945  |

Table S1

|             |   |      |
|-------------|---|------|
| IPI00795015 | K | 2495 |
| IPI00795015 | K | 2501 |
| IPI00795043 | K | 354  |
| IPI00795043 | K | 363  |
| IPI00795292 | K | 127  |
| IPI00795292 | K | 146  |
| IPI00795292 | K | 164  |
| IPI00795292 | K | 171  |
| IPI00795292 | K | 200  |
| IPI00795292 | K | 215  |
| IPI00795292 | K | 239  |
| IPI00795292 | K | 243  |
| IPI00795922 | K | 138  |
| IPI00796331 | K | 64   |
| IPI00796331 | K | 66   |
| IPI00796331 | K | 68   |
| IPI00796331 | K | 70   |
| IPI00796333 | K | 96   |
| IPI00796333 | K | 162  |
| IPI00796333 | K | 201  |
| IPI00796333 | K | 284  |
| IPI00796333 | K | 384  |
| IPI00796513 | K | 294  |
| IPI00796864 | K | 232  |
| IPI00796934 | K | 33   |
| IPI00796934 | K | 82   |
| IPI00797126 | K | 818  |
| IPI00797126 | K | 852  |
| IPI00797126 | K | 854  |
| IPI00797230 | K | 46   |
| IPI00797279 | K | 412  |
| IPI00797279 | K | 559  |
| IPI00797574 | K | 473  |
| IPI00797574 | K | 2430 |
| IPI00797720 | K | 208  |
| IPI00797720 | K | 209  |
| IPI00797720 | K | 211  |
| IPI00797720 | K | 213  |
| IPI00797945 | K | 399  |
| IPI00797945 | K | 546  |
| IPI00798011 | K | 11   |
| IPI00798155 | K | 6    |
| IPI00798155 | K | 48   |
| IPI00807573 | K | 530  |
| IPI00807625 | K | 27   |
| IPI00807625 | K | 66   |
| IPI00807625 | K | 110  |
| IPI00807625 | K | 132  |
| IPI00815642 | K | 30   |
| IPI00815642 | K | 38   |
| IPI00815642 | K | 41   |
| IPI00815642 | K | 52   |

Table S1

|             |   |      |
|-------------|---|------|
| IPI00815642 | K | 58   |
| IPI00815642 | K | 65   |
| IPI00815707 | K | 1685 |
| IPI00815713 | K | 155  |
| IPI00815713 | K | 296  |
| IPI00815713 | K | 600  |
| IPI00815713 | K | 755  |
| IPI00815713 | K | 1451 |
| IPI00816288 | K | 32   |
| IPI00816288 | K | 39   |
| IPI00816773 | K | 38   |
| IPI00816773 | K | 43   |
| IPI00827535 | K | 15   |
| IPI00827535 | K | 18   |
| IPI00827535 | K | 103  |
| IPI00827535 | K | 104  |
| IPI00827930 | K | 416  |
| IPI00827930 | K | 419  |
| IPI00827930 | K | 421  |
| IPI00827967 | K | 663  |
| IPI00828125 | K | 507  |
| IPI00829826 | K | 15   |
| IPI00829826 | K | 1076 |
| IPI00829826 | K | 1177 |
| IPI00829826 | K | 1309 |
| IPI00829826 | K | 1311 |
| IPI00829826 | K | 1354 |
| IPI00829826 | K | 1502 |
| IPI00829826 | K | 1504 |
| IPI00829826 | K | 1529 |
| IPI00843975 | K | 60   |
| IPI00843975 | K | 79   |
| IPI00843975 | K | 139  |
| IPI00843975 | K | 253  |
| IPI00844000 | K | 571  |
| IPI00844214 | K | 91   |
| IPI00844264 | K | 127  |
| IPI00844310 | K | 243  |
| IPI00844508 | K | 579  |
| IPI00844578 | K | 191  |
| IPI00844578 | K | 193  |
| IPI00844578 | K | 199  |
| IPI00844578 | K | 1024 |
| IPI00845227 | K | 185  |
| IPI00845355 | K | 967  |
| IPI00845355 | K | 1930 |
| IPI00845355 | K | 1933 |
| IPI00845355 | K | 1935 |
| IPI00845355 | K | 1936 |
| IPI00845355 | K | 1939 |
| IPI00845461 | K | 418  |
| IPI00845479 | K | 471  |



Table S1

|             |   |      |
|-------------|---|------|
| IPI00845508 | K | 222  |
| IPI00847436 | K | 196  |
| IPI00848226 | K | 130  |
| IPI00848321 | K | 185  |
| IPI00848321 | K | 186  |
| IPI00852603 | K | 1053 |
| IPI00852603 | K | 1059 |
| IPI00852685 | K | 1057 |
| IPI00852685 | K | 1103 |
| IPI00852960 | K | 129  |
| IPI00852979 | K | 1845 |
| IPI00853009 | K | 462  |
| IPI00853077 | K | 738  |
| IPI00853077 | K | 910  |
| IPI00853077 | K | 917  |
| IPI00853240 | K | 266  |
| IPI00853240 | K | 621  |
| IPI00853240 | K | 625  |
| IPI00853240 | K | 628  |
| IPI00853240 | K | 776  |
| IPI00853400 | K | 92   |
| IPI00854642 | K | 974  |
| IPI00854642 | K | 1146 |
| IPI00854642 | K | 1211 |
| IPI00854642 | K | 1290 |
| IPI00855767 | K | 231  |
| IPI00855767 | K | 422  |
| IPI00855833 | K | 1223 |
| IPI00855833 | K | 1226 |
| IPI00855856 | K | 51   |
| IPI00855856 | K | 251  |
| IPI00855924 | K | 27   |
| IPI00855924 | K | 68   |
| IPI00855980 | K | 91   |
| IPI00855998 | K | 1673 |
| IPI00855998 | K | 2757 |
| IPI00855998 | K | 2875 |
| IPI00856045 | K | 1510 |
| IPI00856049 | K | 70   |
| IPI00856115 | K | 90   |
| IPI00856115 | K | 333  |
| IPI00867509 | K | 390  |
| IPI00867509 | K | 499  |
| IPI00867714 | K | 171  |
| IPI00869087 | K | 21   |
| IPI00871134 | K | 28   |
| IPI00871535 | K | 592  |
| IPI00871535 | K | 613  |
| IPI00871535 | K | 637  |
| IPI00871535 | K | 779  |
| IPI00871535 | K | 1022 |
| IPI00871535 | K | 1023 |

Table S1

|             |   |      |
|-------------|---|------|
| IPI00871535 | K | 1519 |
| IPI00871535 | K | 2057 |
| IPI00871535 | K | 2426 |
| IPI00871535 | K | 2431 |
| IPI00871539 | K | 405  |
| IPI00871539 | K | 1104 |
| IPI00871780 | K | 319  |
| IPI00871780 | K | 895  |
| IPI00871851 | K | 225  |
| IPI00871870 | K | 56   |
| IPI00871870 | K | 61   |
| IPI00872071 | K | 106  |
| IPI00872359 | K | 235  |
| IPI00872411 | K | 170  |
| IPI00872762 | K | 54   |
| IPI00872780 | K | 213  |
| IPI00872780 | K | 225  |
| IPI00872780 | K | 293  |
| IPI00872780 | K | 300  |
| IPI00872874 | K | 51   |
| IPI00873029 | K | 681  |
| IPI00873029 | K | 809  |
| IPI00873082 | K | 381  |
| IPI00873495 | K | 1126 |
| IPI00873518 | K | 61   |
| IPI00873622 | K | 28   |
| IPI00873622 | K | 81   |
| IPI00873622 | K | 115  |
| IPI00873622 | K | 481  |
| IPI00873622 | K | 512  |
| IPI00873703 | K | 1462 |
| IPI00873810 | K | 53   |
| IPI00874020 | K | 125  |
| IPI00876931 | K | 47   |
| IPI00877014 | K | 203  |
| IPI00878183 | K | 452  |
| IPI00878213 | K | 1055 |
| IPI00878215 | K | 152  |
| IPI00878910 | K | 32   |
| IPI00878910 | K | 38   |
| IPI00878910 | K | 298  |
| IPI00878931 | K | 150  |
| IPI00879588 | K | 891  |
| IPI00879588 | K | 925  |
| IPI00879819 | K | 27   |
| IPI00879819 | K | 61   |
| IPI00879819 | K | 373  |
| IPI00879819 | K | 500  |
| IPI00880048 | K | 252  |
| IPI00883857 | K | 352  |
| IPI00883857 | K | 565  |
| IPI00883857 | K | 609  |

Table S1

|             |   |      |
|-------------|---|------|
| IPI00883857 | K | 635  |
| IPI00883857 | K | 814  |
| IPI00884896 | K | 243  |
| IPI00884896 | K | 409  |
| IPI00885078 | K | 536  |
| IPI00885104 | K | 163  |
| IPI00885104 | K | 169  |
| IPI00885104 | K | 170  |
| IPI00885104 | K | 171  |
| IPI00885104 | K | 172  |
| IPI00885104 | K | 177  |
| IPI00888429 | K | 527  |
| IPI00890837 | K | 1349 |
| IPI00893197 | K | 112  |
| IPI00893197 | K | 352  |
| IPI00894296 | K | 278  |
| IPI00895801 | K | 216  |
| IPI00895801 | K | 283  |
| IPI00895801 | K | 305  |
| IPI00902533 | K | 317  |
| IPI00902533 | K | 319  |
| IPI00902560 | K | 46   |
| IPI00902560 | K | 54   |
| IPI00902560 | K | 87   |
| IPI00902560 | K | 89   |
| IPI00902560 | K | 135  |
| IPI00902906 | K | 993  |
| IPI00903139 | K | 338  |
| IPI00903145 | K | 79   |
| IPI00903145 | K | 253  |
| IPI00903145 | K | 258  |
| IPI00903145 | K | 263  |
| IPI00903145 | K | 344  |
| IPI00908586 | K | 241  |
| IPI00909140 | K | 58   |
| IPI00909140 | K | 103  |
| IPI00909140 | K | 379  |
| IPI00910610 | K | 7    |
| IPI00914566 | K | 123  |
| IPI00914566 | K | 353  |
| IPI00914930 | K | 720  |
| IPI00915324 | K | 118  |
| IPI00915334 | K | 1168 |
| IPI00915334 | K | 1174 |
| IPI00915400 | K | 263  |
| IPI00915400 | K | 270  |
| IPI00915400 | K | 429  |
| IPI00915400 | K | 555  |
| IPI00916027 | K | 471  |
| IPI00916027 | K | 472  |
| IPI00916027 | K | 474  |
| IPI00916111 | K | 121  |

Table S1

|             |   |      |
|-------------|---|------|
| IPI00916111 | K | 136  |
| IPI00916111 | K | 316  |
| IPI00916144 | K | 267  |
| IPI00916144 | K | 270  |
| IPI00916332 | K | 758  |
| IPI00916332 | K | 827  |
| IPI00916332 | K | 1508 |
| IPI00916332 | K | 1772 |
| IPI00916332 | K | 2009 |
| IPI00916332 | K | 2802 |
| IPI00916332 | K | 2809 |
| IPI00916332 | K | 2814 |
| IPI00916332 | K | 2832 |
| IPI00916332 | K | 3714 |
| IPI00921422 | K | 48   |
| IPI00921844 | K | 264  |
| IPI00922697 | K | 77   |
| IPI00922697 | K | 83   |
| IPI00922697 | K | 328  |
| IPI00922697 | K | 343  |
| IPI00924816 | K | 4    |
| IPI00924816 | K | 11   |
| IPI00924816 | K | 24   |
| IPI00924816 | K | 97   |
| IPI00925046 | K | 309  |
| IPI00925046 | K | 620  |
| IPI00925255 | K | 28   |
| IPI00925345 | K | 198  |
| IPI00925924 | K | 804  |
| IPI00926625 | K | 24   |
| IPI00926625 | K | 265  |
| IPI00926625 | K | 272  |
| IPI00926625 | K | 279  |
| IPI00926625 | K | 528  |
| IPI00927606 | K | 148  |
| IPI00929648 | K | 86   |
| IPI00930290 | K | 373  |
| IPI00930609 | K | 51   |
| IPI00930609 | K | 269  |
| IPI00930609 | K | 318  |
| IPI00930609 | K | 323  |
| IPI00930609 | K | 333  |
| IPI00930688 | K | 40   |
| IPI00930688 | K | 163  |
| IPI00930688 | K | 280  |
| IPI00930688 | K | 311  |
| IPI00930688 | K | 394  |
| IPI00930688 | K | 401  |
| IPI00935252 | K | 1166 |
| IPI00935252 | K | 1170 |
| IPI00935252 | K | 1171 |
| IPI00935252 | K | 1174 |

Table S1

|             |   |      |
|-------------|---|------|
| IPI00935252 | K | 1178 |
| IPI00936931 | K | 267  |
| IPI00937545 | K | 1136 |
| IPI00937615 | K | 132  |
| IPI00937615 | K | 147  |
| IPI00937615 | K | 212  |
| IPI00937615 | K | 434  |
| IPI00939163 | K | 68   |
| IPI00939163 | K | 234  |
| IPI00939163 | K | 272  |
| IPI00939163 | K | 430  |
| IPI00939238 | K | 51   |
| IPI00939238 | K | 70   |
| IPI00939265 | K | 262  |
| IPI00939320 | K | 173  |
| IPI00939493 | K | 174  |
| IPI00939493 | K | 189  |
| IPI00939776 | K | 39   |
| IPI00939879 | K | 144  |
| IPI00940148 | K | 54   |
| IPI00940148 | K | 112  |
| IPI00940148 | K | 269  |
| IPI00940180 | K | 159  |
| IPI00940237 | K | 35   |
| IPI00940237 | K | 187  |
| IPI00940237 | K | 333  |
| IPI00940437 | K | 135  |
| IPI00940535 | K | 61   |
| IPI00940685 | K | 18   |
| IPI00940744 | K | 84   |
| IPI00940842 | K | 101  |
| IPI00941161 | K | 202  |
| IPI00941161 | K | 815  |
| IPI00941221 | K | 418  |
| IPI00941255 | K | 238  |
| IPI00941331 | K | 196  |
| IPI00941331 | K | 367  |
| IPI00941501 | K | 394  |
| IPI00941534 | K | 187  |
| IPI00941534 | K | 209  |
| IPI00941534 | K | 214  |
| IPI00941747 | K | 137  |
| IPI00941747 | K | 458  |
| IPI00941928 | K | 496  |
| IPI00941972 | K | 40   |
| IPI00942092 | K | 147  |
| IPI00942092 | K | 295  |
| IPI00942246 | K | 516  |
| IPI00942458 | K | 510  |
| IPI00942495 | K | 236  |
| IPI00942495 | K | 241  |
| IPI00942668 | K | 44   |

Table S1

|             |   |      |
|-------------|---|------|
| IPI00942760 | K | 340  |
| IPI00942976 | K | 43   |
| IPI00942979 | K | 6    |
| IPI00942979 | K | 11   |
| IPI00942979 | K | 144  |
| IPI00942979 | K | 204  |
| IPI00942979 | K | 232  |
| IPI00942979 | K | 241  |
| IPI00942979 | K | 260  |
| IPI00942979 | K | 314  |
| IPI00942979 | K | 352  |
| IPI00942979 | K | 456  |
| IPI00942979 | K | 597  |
| IPI00942979 | K | 603  |
| IPI00943074 | K | 459  |
| IPI00943093 | K | 305  |
| IPI00943167 | K | 1022 |
| IPI00943173 | K | 337  |
| IPI00943173 | K | 446  |
| IPI00945964 | K | 175  |
| IPI00946154 | K | 168  |
| IPI00946154 | K | 261  |
| IPI00946154 | K | 267  |
| IPI00946154 | K | 271  |
| IPI00946154 | K | 277  |
| IPI00953461 | K | 724  |
| IPI00953625 | K | 353  |
| IPI00953689 | K | 225  |
