# Supplementary material for: Bioinformatic Analysis and Post-Translational Modification Crosstalk Prediction of Lysine Acetylation
Source: PubMed Central journal article supplement (PMC3229533; doi:10.1371/journal.pone.0028228), 2011-12-02
Supplement: pone.0028228.s007.pdf [file pone.0028228.s007.pdf]

Table S4

| IPI         | KacPos | PhosphPos | Kac->L | Kac->Q | KnownPhosph | GeneID |
|-------------|--------|-----------|--------|--------|-------------|--------|
| IPI00005630 | 117    | 120       |        | K->    |             | 1869   |
| IPI00005630 | 120    | 120       | K->    | K->    |             | 1869   |
| IPI00005630 | 125    | 120       | K->    | K->    |             | 1869   |
| IPI00005996 | 26     | 29        |        | ->R    |             | 8091   |
| IPI00007913 | 128    | 132       | ->K    | ->K    |             | 23092  |
| IPI00010700 | 1196   | 1195      | K->    | K->    |             | 7916   |
| IPI00012011 | 114    | 112       | ->K    |        |             | 1072   |
| IPI00012011 | 121    | 121       | K->    | K->    |             | 1072   |
| IPI00012011 | 132    | 127       | K->    | K->    |             | 1072   |
| IPI00012199 | 212    | 213       |        | K->    |             | 79080  |
| IPI00012199 | 213    | 213       | K->    | K->    |             | 79080  |
| IPI00013999 | 316    | 314       | ->K    |        |             | 2623   |
| IPI00013999 | 316    | 315       | K->    |        |             | 2623   |
| IPI00018279 | 251    | 254       | ->K    |        |             | 50509  |
| IPI00018279 | 255    | 260       | K->    | K->    |             | 50509  |
| IPI00019755 | 143    | 143       | K->    | K->    |             | 9446   |
| IPI00019755 | 148    | 143       |        | K->    |             | 9446   |
| IPI00021175 | 504    | 509       | K->    | K->    |             | 51755  |
| IPI00021924 | 179    | 180       |        | K->    |             | 8971   |
| IPI00021924 | 180    | 180       | K->    | K->    |             | 8971   |
| IPI00021924 | 182    | 179       | ->K    | ->K    |             | 8971   |
| IPI00021924 | 182    | 180       |        | K->    |             | 8971   |
| IPI00021924 | 185    | 180       | K->    | K->    |             | 8971   |
| IPI00026089 | 1067   | 1070      | ->K    |        |             | 23451  |
| IPI00027415 | 947    | 951       | K->    | K->    |             | 170506 |
| IPI00028888 | 341    | 345       |        | ->R    | Uniprot     | 3184   |
| IPI00074893 | 843    | 842       |        | K->    |             | 57473  |
| IPI00152653 | 322    | 320       | ->K    |        |             | 1767   |
| IPI00171611 | 10     | 10        | K->    | K->    | Uniprot     | 653604 |
| IPI00171611 | 15     | 10        | K->    | K->    | Uniprot     | 653604 |
| IPI00216402 | 10     | 10        | K->    | K->    |             | 8290   |
| IPI00216402 | 15     | 10        | K->    | K->    |             | 8290   |
| IPI00216402 | 28     | 28        | K->    | K->    | Uniprot     | 8290   |
| IPI00217465 | 63     | 63        | K->    | K->    |             | 3006   |
| IPI00217466 | 64     | 64        | K->    | K->    |             | 3007   |
| IPI00217467 | 63     | 63        | K->    | K->    |             | 3008   |
| IPI00217467 | 90     | 85        |        | K->    |             | 3008   |
| IPI00217467 | 136    | 137       | ->K    |        |             | 3008   |
| IPI00217467 | 168    | 169       | ->K    |        |             | 3008   |
| IPI00217468 | 207    | 204       | ->K    | ->K    |             | 3009   |
| IPI00217469 | 88     | 88        | K->    | K->    |             | 3024   |
| IPI00217469 | 93     | 88        | K->    | K->    |             | 3024   |
| IPI00219038 | 10     | 10        | K->    | K->    | Uniprot     | 644914 |
| IPI00219038 | 15     | 10        | K->    | K->    | Uniprot     | 644914 |
| IPI00219038 | 28     | 28        | K->    | K->    | Uniprot     | 644914 |
| IPI00219038 | 37     | 37        | K->    | K->    | Uniprot     | 644914 |
| IPI00219038 | 38     | 37        | K->    | K->    | Uniprot     | 644914 |
| IPI00220289 | 198    | 196       | ->K    |        |             | 84181  |
| IPI00220403 | 13     | 16        |        | K->    |             | 3018   |
| IPI00220403 | 16     | 16        | K->    | K->    |             | 3018   |
| IPI00220403 | 17     | 16        | K->    | K->    |             | 3018   |

Table S4

|             |      |      |     |     |         |        |
|-------------|------|------|-----|-----|---------|--------|
| IPI00220403 | 21   | 16   | K-> | K-> |         | 3018   |
| IPI00220403 | 24   | 24   | K-> | K-> |         | 3018   |
| IPI00221394 | 474  | 477  | ->K |     |         | 1736   |
| IPI00292771 | 2070 | 2070 | K-> | K-> |         | 4926   |
| IPI00292771 | 2071 | 2070 | K-> | K-> |         | 4926   |
| IPI00333533 | 631  | 631  | K-> | K-> |         | 367    |
| IPI00333533 | 633  | 631  |     | K-> |         | 367    |
| IPI00377245 | 4244 | 4244 | K-> | K-> |         | 8085   |
| IPI00383105 | 490  | 490  | K-> | K-> |         | 80205  |
| IPI00385267 | 169  | 173  |     | ->K |         | 6734   |
| IPI00385267 | 170  | 173  | ->K |     |         | 6734   |
| IPI00385267 | 170  | 174  |     | ->K |         | 6734   |
| IPI00394926 | 287  | 282  |     | K-> |         | 10714  |
| IPI00396485 | 386  | 385  | K-> | K-> |         | 1915   |
| IPI00409671 | 25   | 25   | K-> | K-> |         | 11325  |
| IPI00419884 | 10   | 10   | K-> | K-> |         | 440093 |
| IPI00419884 | 15   | 10   | K-> | K-> |         | 440093 |
| IPI00453473 | 6    | 9    | ->K |     |         | 121504 |
| IPI00455210 | 115  | 116  |     | K-> |         | 1108   |
| IPI00455210 | 115  | 118  | ->K |     |         | 1108   |
| IPI00455210 | 116  | 116  | K-> | K-> |         | 1108   |
| IPI00465070 | 10   | 10   | K-> | K-> | Uniprot | 8356   |
| IPI00465070 | 15   | 10   | K-> | K-> | Uniprot | 8356   |
| IPI00465070 | 28   | 28   | K-> | K-> | Uniprot | 8356   |
| IPI00465070 | 37   | 37   | K-> | K-> | Uniprot | 8356   |
| IPI00473014 | 114  | 112  | ->K |     |         | 11034  |
| IPI00479571 | 35   | 33   | ->K |     |         | 84062  |
| IPI00554798 | 13   | 16   |     | K-> |         | 8342   |
| IPI00554798 | 16   | 16   | K-> | K-> |         | 8342   |
| IPI00554798 | 17   | 16   | K-> | K-> |         | 8342   |
| IPI00554798 | 21   | 16   | K-> | K-> |         | 8342   |
| IPI00554798 | 24   | 24   | K-> | K-> |         | 8342   |
| IPI00645192 | 461  | 461  | K-> | K-> |         | 4204   |
| IPI00743143 | 127  | 129  |     | K-> |         | 51147  |
| IPI00743143 | 129  | 129  | K-> | K-> |         | 51147  |
| IPI00743143 | 130  | 129  | K-> | K-> |         | 51147  |
| IPI00743143 | 131  | 129  |     | K-> |         | 51147  |
| IPI00743143 | 156  | 156  | K-> | K-> |         | 51147  |
| IPI00743143 | 161  | 156  | K-> | K-> |         | 51147  |
| IPI00746310 | 23   | 24   | R-> |     |         | 3159   |
| IPI00746310 | 55   | 58   | R-> |     | Uniprot | 3159   |
| IPI00782966 | 1350 | 1351 | ->K |     |         | 64397  |
| IPI00815713 | 155  | 159  | K-> | K-> |         | 6949   |
| IPI00885104 | 170  | 171  | ->K |     |         | 54737  |

Table S4

| Symbol    | Seq                    |
|-----------|------------------------|
| E2F1      | grgrhpgkgvKspgeksryet  |
| E2F1      | grgrhpgkgvKspgeksryet  |
| E2F1      | grgrhpgkgvKspgeksryet  |
| HMGA2     | paapapqkrgRgrprkqqep   |
| ARHGAP26  | eqigaakeakKkydketekyc  |
| BAT2      | wspakslapKkpptgplpps   |
| CFL1      | ifwapesapKskmiyasskd   |
| CFL1      | lkskmiyassKdaikkkltgi  |
| CFL1      | yasskdaikkKltgikhelqa  |
| CCDC86    | etvtggfgakKrkgsqqapa   |
| CCDC86    | etvtggfgakKrkgsqqapa   |
| GATA1     | trnrkasgkgKkkrsgslgt   |
| GATA1     | rnrkasgkgKkkrsgslgtg   |
| COL5A3    | prrkkgkgrKkgrgrkggr    |
| COL5A3    | gkgrkkgrgrKkgrkknkei   |
| GSTO1     | sqnkedyagKkefrkeftkl   |
| GSTO1     | sqnkedyagKkefrkeftkl   |
| CDK12     | gtrdskpialKeeivtpkete  |
| H1FX      | rshkkgagakKdkggkakhta  |
| H1FX      | rshkkgagakKdkggkakhta  |
| H1FX      | qrshkkgagakKdkggkakhta |
| H1FX      | rshkkgagakKdkggkakhta  |
| H1FX      | rshkkgagakKdkggkakhta  |
| SF3B1     | fellellkahKkairratvnt  |
| DHX36     | riahlvkelrKeldillqeki  |
| HNRNPD    | qqsgygkvsrRgghqnsyky   |
| ZNF512B   | kekknlaggKkgrkrpkert   |
| DNAH5     | kavlavlaaaKskllktwrem  |
| HIST2H3D  | -martkqtarKstggkaprkq  |
| HIST2H3D  | -martkqtarKstggkaprkq  |
| HIST3H3   | -martkqtarKstggkaprkq  |
| HIST3H3   | -martkqtarKstggkaprkq  |
| HIST3H3   | rkqlatkarKsapatggvkk   |
| HIST1H1C  | ersgvsaalKkalaaagydv   |
| HIST1H1D  | ersgvsaalKkalaaagydv   |
| HIST1H1E  | ersgvsaalKkalaaagydv   |
| HIST1H1E  | knnsriklgiKslvskgtlvq  |
| HIST1H1E  | kakppagaakKpkkatgaatp  |
| HIST1H1E  | kkpaaaagakKakspkkaa    |
| HIST1H1B  | kavkpaakpKaakpkaakpk   |
| HIST1H1A  | knnsriklgiKslvskgtlvq  |
| HIST1H1A  | knnsriklgiKslvskgtlvq  |
| LOC644914 | -martkqtarKstggkaprkq  |
| LOC644914 | -martkqtarKstggkaprkq  |
| LOC644914 | rkqlatkaarKsapatggvkk  |
| LOC644914 | rksapstggvKkphryrpgtv  |
| LOC644914 | rksapstggvKkphryrpgtv  |
| CHD6      | keqgptpvekKkkgkrksett  |
| HIST1H2BB | ksapapkkgsKkaitkaqkdd  |
| HIST1H2BB | ksapapkkgsKkaitkaqkdd  |
| HIST1H2BB | ksapapkkgsKkaitkaqkdd  |

Table S4

HIST1H2BB ksapapkkgsKkakitkaqkkd  
 HIST1H2BB gskkaitkaqKkdgkkrkrsr  
 DKC1 kkekkkskddKkakaglesga  
 NUMA1 gnsllrrgasKkalskaspnt  
 NUMA1 gnsllrrgasKkalskaspnt  
 AR yeagmtlgarKlkklgnlklq  
 AR yeagmtlgarKlkklgnlklq  
 MLL2 psnkedaaarKpltpkprkvq  
 CHD9 clqrppsskKsdgsgtytkl  
 SRPR kaknskkkgaKkegsdgplat  
 SRPR kaknskkkgaKkegsdgplat  
 SRPR aknskkkgakKegsdgplats  
 POLD3 epklatpaglKksskkaepvk  
 EEF1A1 lkekidrrsgKkledgpkflk  
 DDX42 gfggfaisagKkeepklpqq  
 H3F3C -martkqtarKstggkprkq  
 H3F3C -martkqtarKstggkprkq  
 HIST4H4 --msgrgkkgKglgkkgakrh  
 CHD4 egdytpgkkKkkklgpkkek  
 CHD4 sdytpgkkkkKklgpkkekks  
 CHD4 egdytpgkkKkkklgpkkek  
 HIST1H3J -martkqtarKstggkprkq  
 HIST1H3J -martkqtarKstggkprkq  
 HIST1H3J rkqlatkaarKsapatggvkk  
 HIST1H3J rksapatggvKkphryrpgtv  
 DSTN flwapelapKskmiyasskd  
 DTNBP1 lsdsreakvKskprtvpflp  
 HIST1H2BM ksapvpkkgsKkainkaqkkd  
 HIST1H2BM ksapvpkkgsKkainkaqkkd  
 HIST1H2BM ksapvpkkgsKkainkaqkkd  
 HIST1H2BM ksapvpkkgsKkainkaqkkd  
 HIST1H2BM gskkainkaqKkdgkkrkrsr  
 MECP2 avataataaeKykhrgegerk  
 ING4 sdydsssskgKkkgrtqkekk  
 ING4 sdydsssskgKkkgrtqkekk  
 ING4 sdydsssskgKkkgrtqkekk  
 ING4 sdydsssskgKkkgrtqkekk  
 ING4 kgknsdeeapKtaqkkklvr  
 ING4 kgknsdeeapKtaqkkklvr  
 HMGA1 skqekdgtekRgrgrprkqpp  
 HMGA1 psevptkrpRgrpkskknw  
 ZFP106 ltsaetrsgKkkklrkkksl  
 TCOF1 anlsgksprKsaepsanttl  
 MPHOSPH8 eekspddlkkKkakagklkdk
