# Supplementary material for: Bioinformatic Analysis and Post-Translational Modification Crosstalk Prediction of Lysine Acetylation
Source: PubMed Central journal article supplement (PMC3229533; doi:10.1371/journal.pone.0028228), 2011-12-02
Supplement: pone.0028228.s008.pdf [file pone.0028228.s008.pdf]

Table S5

| IPI         | KacPos | PhosphPos | Kac->L | Kac->Q | KnownPhosph | GeneID |
|-------------|--------|-----------|--------|--------|-------------|--------|
| IPI00000057 | 3      | 3         | 1->    | 1->    |             | 22796  |
| IPI00000057 | 3      | 10        | 1->    |        |             | 22796  |
| IPI00000494 | 221    | 241       | 1->    |        |             | 6125   |
| IPI00000712 | 536    | 533       |        | ->1    |             | 4780   |
| IPI00000712 | 538    | 533       |        | ->1    |             | 4780   |
| IPI00000712 | 548    | 574       | 1->    |        |             | 4780   |
| IPI00000712 | 554    | 574       | 1->    |        |             | 4780   |
| IPI00000712 | 555    | 574       | 1->    |        |             | 4780   |
| IPI00001735 | 878    | 857       | ->1    |        |             | 9612   |
| IPI00001735 | 878    | 863       | ->1    |        |             | 9612   |
| IPI00001735 | 878    | 876       | ->1    | ->1    |             | 9612   |
| IPI00001735 | 2037   | 2037      | 1->    | 1->    |             | 9612   |
| IPI00002335 | 444    | 440       |        | ->1    |             | 3064   |
| IPI00002335 | 444    | 442       |        | ->1    |             | 3064   |
| IPI00002564 | 256    | 260       | ->1    |        |             | 7515   |
| IPI00002564 | 260    | 256       | ->1    |        |             | 7515   |
| IPI00002966 | 603    | 609       | 1->    | 1->    |             | 3308   |
| IPI00002966 | 603    | 612       | 1->    | 1->    |             | 3308   |
| IPI00003362 | 548    | 580       | 1->    | 1->    |             | 3309   |
| IPI00003362 | 586    | 574       | 1->    |        |             | 3309   |
| IPI00003362 | 586    | 582       | ->1    | ->1    |             | 3309   |
| IPI00003362 | 586    | 592       | ->1    | ->1    |             | 3309   |
| IPI00003442 | 389    | 377       | 1->    |        |             | 3091   |
| IPI00003442 | 389    | 392       |        | ->1    |             | 3091   |
| IPI00003443 | 86     | 116       | ->1    | ->1    |             | 3428   |
| IPI00003817 | 21     | 21        | 1->    | 1->    |             | 397    |
| IPI00003817 | 25     | 30        | ->1    | ->1    |             | 397    |
| IPI00003817 | 33     | 30        | ->1    | ->1    |             | 397    |
| IPI00003817 | 33     | 33        | 1->    | 1->    |             | 397    |
| IPI00003865 | 512    | 507       |        | ->1    |             | 3312   |
| IPI00003865 | 512    | 512       | 1->    | 1->    |             | 3312   |
| IPI00003865 | 524    | 524       | 1->    | 1->    |             | 3312   |
| IPI00003865 | 524    | 526       | ->1    | ->1    |             | 3312   |
| IPI00003865 | 524    | 561       | 1->    |        |             | 3312   |
| IPI00003865 | 526    | 512       | 1->    |        |             | 3312   |
| IPI00003865 | 526    | 531       | ->1    | ->1    |             | 3312   |
| IPI00003865 | 526    | 561       | 1->    |        |             | 3312   |
| IPI00003865 | 531    | 526       | ->1    | ->1    |             | 3312   |
| IPI00003865 | 531    | 535       | ->1    | ->1    |             | 3312   |
| IPI00003865 | 531    | 561       | 1->    |        |             | 3312   |
| IPI00003865 | 589    | 561       | 1->    |        |             | 3312   |
| IPI00004233 | 1178   | 1178      | 1->    | 1->    |             | 4288   |
| IPI00004233 | 1185   | 1178      | 1->    |        |             | 4288   |
| IPI00004233 | 1185   | 1185      | 1->    | 1->    |             | 4288   |
| IPI00004233 | 1639   | 1643      |        | ->1    |             | 4288   |
| IPI00004233 | 2005   | 1982      | 1->    | 1->    |             | 4288   |
| IPI00005630 | 117    | 125       | ->1    | ->1    |             | 1869   |
| IPI00005630 | 120    | 125       | ->1    | ->1    |             | 1869   |
| IPI00005648 | 293    | 293       | 1->    | 1->    |             | 9667   |
| IPI00005657 | 21     | 15        | ->1    | ->1    |             | 10471  |
| IPI00005657 | 21     | 21        | 1->    | 1->    |             | 10471  |

Table S5

|             |      |      |     |     |       |
|-------------|------|------|-----|-----|-------|
| IPI00005744 | 30   | 17   |     | ->1 | 6473  |
| IPI00006079 | 335  | 332  |     | ->1 | 9774  |
| IPI00006079 | 437  | 439  |     | ->1 | 9774  |
| IPI00006091 | 1017 | 1004 | 1-> |     | 1756  |
| IPI00006108 | 188  | 189  | 1-> |     | 9794  |
| IPI00006108 | 405  | 407  | ->1 | ->1 | 9794  |
| IPI00006108 | 407  | 405  | ->1 | ->1 | 9794  |
| IPI00006160 | 327  | 321  |     | ->1 | 7161  |
| IPI00006160 | 331  | 321  |     | ->1 | 7161  |
| IPI00006176 | 207  | 226  | 1-> |     | 9146  |
| IPI00006213 | 399  | 393  | 1-> |     | 5108  |
| IPI00006252 | 33   | 63   | 1-> | 1-> | 9255  |
| IPI00006379 | 441  | 444  |     | ->1 | 51602 |
| IPI00006601 | 153  | 153  | 1-> | 1-> | 1114  |
| IPI00006601 | 153  | 159  | ->1 |     | 1114  |
| IPI00006658 | 57   | 52   | ->1 |     | 5303  |
| IPI00006987 | 71   | 75   | ->1 | ->1 | 57062 |
| IPI00007074 | 474  | 474  | 1-> | 1-> | 8565  |
| IPI00007156 | 95   | 95   | 1-> | 1-> | 51176 |
| IPI00007311 | 71   | 81   | 1-> |     | 4097  |
| IPI00007311 | 76   | 81   | 1-> | 1-> | 4097  |
| IPI00007311 | 76   | 83   | 1-> |     | 4097  |
| IPI00007334 | 717  | 731  | ->1 |     | 22985 |
| IPI00007675 | 429  | 428  | ->1 | ->1 | 51143 |
| IPI00007675 | 429  | 435  | 1-> | 1-> | 51143 |
| IPI00007765 | 567  | 555  | 1-> | 1-> | 3313  |
| IPI00007765 | 567  | 563  | 1-> | 1-> | 3313  |
| IPI00007765 | 595  | 555  | 1-> |     | 3313  |
| IPI00007765 | 595  | 595  | 1-> | 1-> | 3313  |
| IPI00007765 | 610  | 612  |     | ->1 | 3313  |
| IPI00007765 | 675  | 653  | 1-> |     | 3313  |
| IPI00007927 | 222  | 211  | 1-> | 1-> | 10592 |
| IPI00007927 | 321  | 320  |     | ->1 | 10592 |
| IPI00007927 | 330  | 332  | ->1 |     | 10592 |
| IPI00007993 | 333  | 296  |     | 1-> | 3090  |
| IPI00008054 | 550  | 546  |     | ->1 | 27154 |
| IPI00008477 | 305  | 269  | 1-> |     | 22974 |
| IPI00008477 | 305  | 279  | 1-> |     | 22974 |
| IPI00009032 | 116  | 105  | 1-> | 1-> | 6741  |
| IPI00009032 | 360  | 363  | ->1 | ->1 | 6741  |
| IPI00009286 | 1133 | 1130 | ->1 |     | 4297  |
| IPI00009328 | 60   | 19   | 1-> |     | 9775  |
| IPI00009713 | 61   | 61   | 1-> | 1-> | 6662  |
| IPI00009713 | 253  | 242  | ->1 |     | 6662  |
| IPI00009713 | 398  | 398  | 1-> | 1-> | 6662  |
| IPI00009904 | 533  | 485  | ->1 | ->1 | 9601  |
| IPI00009960 | 211  | 211  | 1-> | 1-> | 10989 |
| IPI00009960 | 211  | 216  | 1-> |     | 10989 |
| IPI00009960 | 451  | 442  | 1-> |     | 10989 |
| IPI00009960 | 506  | 506  | 1-> | 1-> | 10989 |
| IPI00010085 | 356  | 353  | 1-> |     | 5326  |
| IPI00010085 | 356  | 356  | 1-> | 1-> | 5326  |

Table S5

|             |      |      |     |     |       |
|-------------|------|------|-----|-----|-------|
| IPI00010193 | 399  | 399  | 1-> | 1-> | 3455  |
| IPI00010196 | 286  | 286  | 1-> | 1-> | 8204  |
| IPI00010196 | 310  | 310  | 1-> | 1-> | 8204  |
| IPI00010196 | 481  | 474  | 1-> |     | 8204  |
| IPI00010196 | 481  | 481  | 1-> | 1-> | 8204  |
| IPI00010196 | 481  | 508  | 1-> |     | 8204  |
| IPI00010196 | 528  | 508  | 1-> |     | 8204  |
| IPI00010196 | 606  | 606  | 1-> | 1-> | 8204  |
| IPI00010252 | 763  | 763  | 1-> | 1-> | 51592 |
| IPI00010252 | 763  | 769  | ->1 | ->1 | 51592 |
| IPI00010252 | 769  | 774  | ->1 | ->1 | 51592 |
| IPI00010415 | 168  | 192  | ->1 | ->1 | 11332 |
| IPI00010415 | 198  | 192  | ->1 | ->1 | 11332 |
| IPI00010586 | 522  | 515  | 1-> | 1-> | 7110  |
| IPI00010700 | 1196 | 1206 | ->1 | ->1 | 7916  |
| IPI00010740 | 472  | 462  | 1-> |     | 6421  |
| IPI00010740 | 472  | 466  | 1-> |     | 6421  |
| IPI00011857 | 494  | 506  | 1-> |     | 8208  |
| IPI00011875 | 98   | 98   | 1-> | 1-> | 3550  |
| IPI00011875 | 386  | 386  | 1-> | 1-> | 3550  |
| IPI00011875 | 386  | 388  | ->1 | ->1 | 3550  |
| IPI00012079 | 591  | 583  | ->1 |     | 1975  |
| IPI00012149 | 609  | 609  | 1-> | 1-> | 10199 |
| IPI00012149 | 609  | 612  | ->1 | ->1 | 10199 |
| IPI00012820 | 379  | 391  | 1-> |     | 604   |
| IPI00013122 | 154  | 149  | ->1 | ->1 | 11140 |
| IPI00013297 | 132  | 137  | ->1 | ->1 | 11333 |
| IPI00013452 | 535  | 528  | 1-> |     | 2058  |
| IPI00013452 | 788  | 788  | 1-> | 1-> | 2058  |
| IPI00013452 | 788  | 792  | ->1 | ->1 | 2058  |
| IPI00013830 | 115  | 141  | 1-> | 1-> | 22938 |
| IPI00013894 | 100  | 100  | 1-> | 1-> | 10963 |
| IPI00013991 | 118  | 112  | ->1 |     | 7169  |
| IPI00014533 | 61   | 35   | 1-> |     | 7343  |
| IPI00014938 | 142  | 142  | 1-> | 1-> | 84324 |
| IPI00014938 | 142  | 149  |     | ->1 | 84324 |
| IPI00015180 | 1341 | 1315 | ->1 | ->1 | 357   |
| IPI00015286 | 1605 | 1610 |     | ->1 | 1793  |
| IPI00015833 | 142  | 136  | 1-> |     | 54927 |
| IPI00015947 | 44   | 35   |     | ->1 | 3337  |
| IPI00015947 | 44   | 37   | 1-> |     | 3337  |
| IPI00015947 | 44   | 44   | 1-> | 1-> | 3337  |
| IPI00015947 | 44   | 46   | 1-> |     | 3337  |
| IPI00015947 | 46   | 37   | 1-> |     | 3337  |
| IPI00015947 | 46   | 44   | 1-> |     | 3337  |
| IPI00015947 | 46   | 46   | 1-> | 1-> | 3337  |
| IPI00016405 | 131  | 133  | ->1 |     | 54940 |
| IPI00017305 | 75   | 42   | 1-> | 1-> | 6195  |
| IPI00017451 | 251  | 266  | 1-> | 1-> | 10291 |
| IPI00017592 | 597  | 603  |     | ->1 | 3954  |
| IPI00017659 | 81   | 88   | 1-> | 1-> | 92241 |
| IPI00017855 | 520  | 521  | 1-> | 1-> | 50    |

Table S5

|             |      |      |     |     |       |
|-------------|------|------|-----|-----|-------|
| IPI00018251 | 31   | 31   | 1-> | 1-> | 10499 |
| IPI00018251 | 636  | 640  |     | ->1 | 10499 |
| IPI00018251 | 640  | 636  | ->1 | ->1 | 10499 |
| IPI00018251 | 780  | 785  | ->1 | ->1 | 10499 |
| IPI00018251 | 785  | 780  | ->1 | ->1 | 10499 |
| IPI00018251 | 788  | 785  | ->1 | ->1 | 10499 |
| IPI00018251 | 788  | 788  | 1-> | 1-> | 10499 |
| IPI00018823 | 512  | 512  | 1-> | 1-> | 80314 |
| IPI00019226 | 481  | 481  | 1-> | 1-> | 10902 |
| IPI00019226 | 481  | 493  | 1-> |     | 10902 |
| IPI00019380 | 698  | 698  | 1-> | 1-> | 4686  |
| IPI00019502 | 992  | 995  |     | ->1 | 4627  |
| IPI00019502 | 1024 | 1014 | ->1 | ->1 | 4627  |
| IPI00019502 | 1024 | 1022 |     | ->1 | 4627  |
| IPI00019502 | 1357 | 1357 | 1-> | 1-> | 4627  |
| IPI00019502 | 1404 | 1404 | 1-> | 1-> | 4627  |
| IPI00019502 | 1410 | 1413 | ->1 | ->1 | 4627  |
| IPI00019502 | 1459 | 1459 | 1-> | 1-> | 4627  |
| IPI00019502 | 1828 | 1788 | ->1 |     | 4627  |
| IPI00019502 | 1828 | 1815 | 1-> |     | 4627  |
| IPI00019502 | 1828 | 1828 | 1-> | 1-> | 4627  |
| IPI00019812 | 40   | 32   | 1-> |     | 5536  |
| IPI00019812 | 42   | 32   | 1-> |     | 5536  |
| IPI00019848 | 2005 | 2011 |     | ->1 | 3054  |
| IPI00020567 | 80   | 43   |     | ->1 | 392   |
| IPI00020599 | 206  | 209  |     | ->1 | 811   |
| IPI00020599 | 209  | 206  |     | ->1 | 811   |
| IPI00020599 | 209  | 207  | ->1 | ->1 | 811   |
| IPI00020599 | 238  | 232  | ->1 | ->1 | 811   |
| IPI00020985 | 77   | 77   | 1-> | 1-> | 2033  |
| IPI00020985 | 77   | 79   | 1-> |     | 2033  |
| IPI00020985 | 79   | 77   | 1-> |     | 2033  |
| IPI00020985 | 79   | 79   | 1-> | 1-> | 2033  |
| IPI00020985 | 291  | 291  | 1-> | 1-> | 2033  |
| IPI00020985 | 292  | 291  | 1-> |     | 2033  |
| IPI00020985 | 292  | 292  | 1-> | 1-> | 2033  |
| IPI00020985 | 970  | 970  | 1-> | 1-> | 2033  |
| IPI00020985 | 970  | 1001 | ->1 |     | 2033  |
| IPI00020985 | 977  | 970  | 1-> |     | 2033  |
| IPI00020985 | 977  | 977  | 1-> | 1-> | 2033  |
| IPI00020985 | 977  | 1001 | ->1 |     | 2033  |
| IPI00020985 | 981  | 981  | 1-> | 1-> | 2033  |
| IPI00020985 | 981  | 1001 | ->1 |     | 2033  |
| IPI00020985 | 1020 | 1001 | ->1 |     | 2033  |
| IPI00020985 | 1024 | 1001 | ->1 |     | 2033  |
| IPI00020985 | 1024 | 1024 | 1-> | 1-> | 2033  |
| IPI00020985 | 1228 | 1228 | 1-> | 1-> | 2033  |
| IPI00020985 | 1228 | 1233 |     | ->1 | 2033  |
| IPI00020985 | 1228 | 1235 |     | ->1 | 2033  |
| IPI00020985 | 1518 | 1518 | 1-> | 1-> | 2033  |
| IPI00020985 | 1528 | 1518 | 1-> |     | 2033  |
| IPI00021175 | 504  | 496  |     | ->1 | 51755 |

Table S5

|             |      |      |     |     |       |
|-------------|------|------|-----|-----|-------|
| IPI00021175 | 504  | 504  | 1-> | 1-> | 51755 |
| IPI00021175 | 504  | 509  | 1-> |     | 51755 |
| IPI00021263 | 49   | 75   | 1-> |     | 7534  |
| IPI00021405 | 97   | 90   |     | ->1 | 4000  |
| IPI00021405 | 97   | 97   | 1-> | 1-> | 4000  |
| IPI00021405 | 108  | 97   | 1-> | 1-> | 4000  |
| IPI00021405 | 108  | 108  | 1-> | 1-> | 4000  |
| IPI00021405 | 108  | 114  | ->1 | ->1 | 4000  |
| IPI00021405 | 114  | 97   | 1-> | 1-> | 4000  |
| IPI00021405 | 114  | 108  | 1-> | 1-> | 4000  |
| IPI00021405 | 114  | 117  | ->1 | ->1 | 4000  |
| IPI00021405 | 233  | 233  | 1-> | 1-> | 4000  |
| IPI00021405 | 260  | 261  |     | ->1 | 4000  |
| IPI00021405 | 260  | 270  |     | ->1 | 4000  |
| IPI00021405 | 261  | 260  | ->1 | ->1 | 4000  |
| IPI00021405 | 270  | 265  |     | ->1 | 4000  |
| IPI00021405 | 378  | 378  | 1-> | 1-> | 4000  |
| IPI00021885 | 620  | 599  |     | ->1 | 2243  |
| IPI00021885 | 625  | 599  |     | ->1 | 2243  |
| IPI00021926 | 15   | 7    | ->1 | ->1 | 5706  |
| IPI00021926 | 15   | 14   | 1-> |     | 5706  |
| IPI00021926 | 15   | 20   |     | ->1 | 5706  |
| IPI00021926 | 20   | 15   | ->1 | ->1 | 5706  |
| IPI00022055 | 428  | 428  | 1-> | 1-> | 8850  |
| IPI00022055 | 430  | 430  | 1-> | 1-> | 8850  |
| IPI00022348 | 515  | 515  | 1-> | 1-> | 5371  |
| IPI00022542 | 647  | 647  | 1-> | 1-> | 6093  |
| IPI00022542 | 718  | 719  | ->1 |     | 6093  |
| IPI00022542 | 718  | 721  | ->1 |     | 6093  |
| IPI00022542 | 719  | 709  | 1-> |     | 6093  |
| IPI00022865 | 112  | 108  | ->1 | ->1 | 890   |
| IPI00022865 | 112  | 113  |     | ->1 | 890   |
| IPI00022865 | 112  | 119  | 1-> |     | 890   |
| IPI00023340 | 815  | 815  | 1-> | 1-> | 7994  |
| IPI00023649 | 149  | 149  | 1-> | 1-> | 55206 |
| IPI00023649 | 149  | 155  | 1-> |     | 55206 |
| IPI00024568 | 1057 | 1049 | ->1 | ->1 | 29998 |
| IPI00024975 | 797  | 792  | 1-> |     | 56992 |
| IPI00024975 | 1009 | 982  | 1-> |     | 56992 |
| IPI00025087 | 292  | 292  | 1-> | 1-> | 7157  |
| IPI00025087 | 305  | 305  | 1-> | 1-> | 7157  |
| IPI00025087 | 319  | 320  | ->1 | ->1 | 7157  |
| IPI00025087 | 319  | 321  | ->1 | ->1 | 7157  |
| IPI00025087 | 320  | 319  | ->1 | ->1 | 7157  |
| IPI00025087 | 320  | 321  | ->1 | ->1 | 7157  |
| IPI00025087 | 321  | 319  | ->1 | ->1 | 7157  |
| IPI00025087 | 321  | 320  | ->1 | ->1 | 7157  |
| IPI00025087 | 381  | 386  | ->1 | ->1 | 7157  |
| IPI00025087 | 382  | 386  |     | ->1 | 7157  |
| IPI00025807 | 551  | 551  | 1-> | 1-> | 6670  |
| IPI00026089 | 141  | 141  | 1-> | 1-> | 23451 |
| IPI00026089 | 141  | 146  | 1-> |     | 23451 |

Table S5

|             |     |     |     |     |        |
|-------------|-----|-----|-----|-----|--------|
| IPI00026089 | 141 | 182 | 1-> |     | 23451  |
| IPI00026089 | 333 | 335 |     | ->1 | 23451  |
| IPI00026156 | 123 | 96  | 1-> |     | 3059   |
| IPI00026156 | 123 | 109 | 1-> |     | 3059   |
| IPI00026156 | 123 | 133 | 1-> |     | 3059   |
| IPI00026156 | 241 | 224 | 1-> |     | 3059   |
| IPI00026156 | 241 | 249 | ->1 | ->1 | 3059   |
| IPI00026156 | 241 | 251 | ->1 |     | 3059   |
| IPI00026156 | 241 | 257 |     | 1-> | 3059   |
| IPI00026309 | 27  | 17  | ->1 | ->1 | 51053  |
| IPI00026337 | 21  | 9   | 1-> |     | 8498   |
| IPI00026337 | 21  | 23  | ->1 | ->1 | 8498   |
| IPI00026337 | 21  | 26  | ->1 | ->1 | 8498   |
| IPI00026337 | 23  | 21  |     | ->1 | 8498   |
| IPI00026337 | 23  | 26  | ->1 | ->1 | 8498   |
| IPI00026337 | 23  | 32  | ->1 |     | 8498   |
| IPI00026559 | 199 | 199 | 1-> | 1-> | 7391   |
| IPI00026940 | 83  | 110 |     | 1-> | 10762  |
| IPI00026940 | 275 | 276 | 1-> | 1-> | 10762  |
| IPI00026940 | 276 | 276 | 1-> | 1-> | 10762  |
| IPI00027230 | 613 | 603 |     | ->1 | 7184   |
| IPI00027230 | 613 | 613 | 1-> | 1-> | 7184   |
| IPI00027569 | 39  | 8   | 1-> | 1-> | 343069 |
| IPI00027834 | 59  | 62  | ->1 | ->1 | 3191   |
| IPI00027988 | 18  | 20  |     | ->1 | 10664  |
| IPI00027988 | 20  | 18  |     | ->1 | 10664  |
| IPI00029196 | 384 | 366 | 1-> | 1-> | 5588   |
| IPI00029400 | 54  | 46  |     | ->1 | 9406   |
| IPI00029485 | 230 | 264 | ->1 | ->1 | 1639   |
| IPI00029601 | 87  | 70  | 1-> |     | 2017   |
| IPI00029601 | 87  | 97  | 1-> |     | 2017   |
| IPI00029601 | 198 | 181 | 1-> | 1-> | 2017   |
| IPI00029601 | 203 | 181 | 1-> | 1-> | 2017   |
| IPI00029601 | 203 | 218 | 1-> |     | 2017   |
| IPI00029601 | 218 | 218 | 1-> | 1-> | 2017   |
| IPI00029601 | 235 | 218 | 1-> |     | 2017   |
| IPI00029629 | 273 | 249 | 1-> | 1-> | 7706   |
| IPI00029629 | 273 | 262 | 1-> |     | 7706   |
| IPI00029697 | 297 | 311 | 1-> |     | 5393   |
| IPI00029764 | 489 | 489 | 1-> | 1-> | 10946  |
| IPI00029764 | 489 | 490 | 1-> | 1-> | 10946  |
| IPI00029795 | 280 | 283 | ->1 | ->1 | 4782   |
| IPI00030247 | 492 | 492 | 1-> | 1-> | 904    |
| IPI00030247 | 492 | 502 | ->1 | ->1 | 904    |
| IPI00030274 | 499 | 488 | ->1 |     | 84081  |
| IPI00030274 | 499 | 499 | 1-> | 1-> | 84081  |
| IPI00030274 | 499 | 511 | 1-> |     | 84081  |
| IPI00030275 | 87  | 87  | 1-> | 1-> | 10131  |
| IPI00030915 | 601 | 606 |     | ->1 | 9101   |
| IPI00031519 | 235 | 239 | ->1 | ->1 | 1786   |
| IPI00032358 | 714 | 714 | 1-> | 1-> | 1E+08  |
| IPI00032358 | 714 | 717 |     | ->1 | 1E+08  |

Table S5

|             |      |      |     |     |        |
|-------------|------|------|-----|-----|--------|
| IPI00032358 | 717  | 714  | 1-> |     | 1E+08  |
| IPI00032598 | 388  | 388  | 1-> | 1-> | 2117   |
| IPI00032831 | 124  | 126  | 1-> | 1-> | 9342   |
| IPI00032904 | 6    | 21   | 1-> | 1-> | 6620   |
| IPI00032904 | 6    | 23   | 1-> | 1-> | 6620   |
| IPI00032904 | 12   | 21   | 1-> | 1-> | 6620   |
| IPI00032904 | 12   | 23   | 1-> | 1-> | 6620   |
| IPI00033016 | 163  | 172  |     | ->1 | 4609   |
| IPI00033487 | 11   | 13   | ->1 | ->1 | 338917 |
| IPI00036742 | 166  | 160  | ->1 |     | 25962  |
| IPI00045550 | 774  | 774  | 1-> | 1-> | 84687  |
| IPI00045550 | 774  | 775  |     | ->1 | 84687  |
| IPI00045914 | 1998 | 1999 | ->1 |     | 23013  |
| IPI00045914 | 1998 | 2005 | ->1 | ->1 | 23013  |
| IPI00045914 | 1999 | 2005 | ->1 | ->1 | 23013  |
| IPI00045914 | 2001 | 1999 | ->1 | ->1 | 23013  |
| IPI00045914 | 2001 | 2005 | ->1 | ->1 | 23013  |
| IPI00060181 | 233  | 226  | ->1 | ->1 | 79180  |
| IPI00060473 | 484  | 484  | 1-> | 1-> | 115704 |
| IPI00061009 | 403  | 402  | 1-> |     | 93594  |
| IPI00061009 | 403  | 403  | 1-> | 1-> | 93594  |
| IPI00061009 | 413  | 403  | 1-> |     | 93594  |
| IPI00062037 | 5    | 5    |     | 1-> | 140735 |
| IPI00069084 | 2543 | 2543 | 1-> | 1-> | 8295   |
| IPI00083708 | 394  | 389  |     | ->1 | 23215  |
| IPI00099810 | 144  | 154  | 1-> |     | 51538  |
| IPI00100160 | 55   | 36   | 1-> | 1-> | 55832  |
| IPI00102661 | 305  | 269  | 1-> |     | 22974  |
| IPI00102661 | 305  | 279  | 1-> |     | 22974  |
| IPI00103483 | 519  | 525  | 1-> |     | 25920  |
| IPI00103654 | 252  | 246  | ->1 |     | 151987 |
| IPI00104050 | 221  | 215  |     | ->1 | 9967   |
| IPI00104050 | 221  | 221  | 1-> | 1-> | 9967   |
| IPI00104050 | 401  | 396  | ->1 | ->1 | 9967   |
| IPI00104050 | 420  | 427  | ->1 | ->1 | 9967   |
| IPI00104050 | 421  | 420  | ->1 | ->1 | 9967   |
| IPI00104050 | 421  | 421  | 1-> | 1-> | 9967   |
| IPI00104050 | 421  | 427  | ->1 | ->1 | 9967   |
| IPI00104050 | 455  | 455  | 1-> | 1-> | 9967   |
| IPI00104050 | 455  | 461  |     | ->1 | 9967   |
| IPI00104050 | 519  | 527  |     | ->1 | 9967   |
| IPI00104050 | 811  | 811  | 1-> | 1-> | 9967   |
| IPI00107745 | 166  | 151  | 1-> |     | 51747  |
| IPI00107745 | 233  | 231  |     | ->1 | 51747  |
| IPI00143753 | 106  | 111  | ->1 | ->1 | 23350  |
| IPI00143753 | 760  | 749  | 1-> |     | 23350  |
| IPI00156649 | 477  | 475  |     | ->1 | 79930  |
| IPI00159322 | 1267 | 1274 | 1-> |     | 6942   |
| IPI00160622 | 1048 | 1036 | ->1 |     | 11190  |
| IPI00162563 | 20   | 20   | 1-> | 1-> | 9810   |
| IPI00164352 | 1117 | 1152 | ->1 |     | 23036  |
| IPI00165189 | 290  | 258  | 1-> | 1-> | 28981  |

Table S5

|             |      |      |     |     |        |
|-------------|------|------|-----|-----|--------|
| IPI00166153 | 108  | 114  |     | ->1 | 23070  |
| IPI00168899 | 135  | 126  | ->1 | ->1 | 80174  |
| IPI00170867 | 512  | 494  | ->1 |     | 1616   |
| IPI00171903 | 277  | 285  | 1-> |     | 4670   |
| IPI00173359 | 562  | 568  |     | ->1 | 55075  |
| IPI00174345 | 156  | 148  | ->1 | ->1 | 200162 |
| IPI00178611 | 304  | 304  | 1-> | 1-> | 55013  |
| IPI00178611 | 304  | 306  | ->1 | ->1 | 55013  |
| IPI00179709 | 40   | 40   | 1-> | 1-> | 113457 |
| IPI00179851 | 123  | 112  | ->1 |     | 745    |
| IPI00179851 | 123  | 123  | 1-> | 1-> | 745    |
| IPI00180240 | 32   | 4    | ->1 | ->1 | 7117   |
| IPI00180240 | 32   | 26   | ->1 | ->1 | 7117   |
| IPI00180240 | 39   | 4    | ->1 | ->1 | 7117   |
| IPI00180240 | 39   | 32   | ->1 | ->1 | 7117   |
| IPI00180240 | 39   | 39   | 1-> | 1-> | 7117   |
| IPI00180675 | 40   | 40   | 1-> | 1-> | 7846   |
| IPI00182757 | 287  | 287  | 1-> | 1-> | 57805  |
| IPI00183968 | 13   | 16   | ->1 | ->1 | 7170   |
| IPI00183968 | 119  | 113  | ->1 |     | 7170   |
| IPI00186224 | 141  | 144  | ->1 | ->1 | 4261   |
| IPI00186224 | 141  | 156  | 1-> |     | 4261   |
| IPI00186224 | 144  | 141  |     | ->1 | 4261   |
| IPI00215911 | 3    | 7    |     | ->1 | 328    |
| IPI00215911 | 6    | 7    |     | ->1 | 328    |
| IPI00215965 | 144  | 183  | ->1 | ->1 | 3178   |
| IPI00216047 | 326  | 328  | ->1 |     | 6601   |
| IPI00216318 | 70   | 87   | 1-> |     | 7529   |
| IPI00216318 | 117  | 87   | 1-> |     | 7529   |
| IPI00216704 | 1258 | 1262 | 1-> |     | 6710   |
| IPI00216704 | 1262 | 1262 | 1-> | 1-> | 6710   |
| IPI00216975 | 118  | 112  | ->1 |     | 7171   |
| IPI00216975 | 161  | 152  | 1-> |     | 7171   |
| IPI00216975 | 161  | 198  | 1-> |     | 7171   |
| IPI00216975 | 213  | 213  | 1-> | 1-> | 7171   |
| IPI00216975 | 213  | 217  | ->1 | ->1 | 7171   |
| IPI00216975 | 220  | 217  | ->1 | ->1 | 7171   |
| IPI00216975 | 220  | 220  | 1-> | 1-> | 7171   |
| IPI00216975 | 220  | 226  | ->1 | ->1 | 7171   |
| IPI00217354 | 273  | 263  | 1-> |     | 55738  |
| IPI00217732 | 538  | 539  | ->1 | ->1 | 406    |
| IPI00217801 | 533  | 523  | ->1 | ->1 | 10014  |
| IPI00217801 | 533  | 525  |     | ->1 | 10014  |
| IPI00217801 | 533  | 537  | ->1 | ->1 | 10014  |
| IPI00217975 | 123  | 145  | 1-> | 1-> | 4001   |
| IPI00217975 | 124  | 145  | 1-> | 1-> | 4001   |
| IPI00217975 | 157  | 145  | 1-> | 1-> | 4001   |
| IPI00217975 | 157  | 156  |     | 1-> | 4001   |
| IPI00217975 | 181  | 145  | 1-> | 1-> | 4001   |
| IPI00217975 | 181  | 156  | 1-> |     | 4001   |
| IPI00217975 | 182  | 145  | 1-> | 1-> | 4001   |
| IPI00218343 | 40   | 40   | 1-> | 1-> | 84790  |



Table S5

|             |      |      |     |     |       |
|-------------|------|------|-----|-----|-------|
| IPI00218624 | 288  | 273  |     | 1-> | 6651  |
| IPI00218624 | 288  | 288  | 1-> | 1-> | 6651  |
| IPI00218728 | 53   | 88   | 1-> | 1-> | 5048  |
| IPI00218823 | 2296 | 2296 | 1-> | 1-> | 9757  |
| IPI00219005 | 274  | 266  | 1-> |     | 2288  |
| IPI00219097 | 30   | 28   |     | ->1 | 3148  |
| IPI00219097 | 30   | 29   | ->1 | ->1 | 3148  |
| IPI00219097 | 59   | 57   | ->1 | ->1 | 3148  |
| IPI00219097 | 59   | 68   | ->1 | ->1 | 3148  |
| IPI00219097 | 139  | 114  | 1-> |     | 3148  |
| IPI00219097 | 139  | 141  |     | 1-> | 3148  |
| IPI00219097 | 157  | 114  | 1-> |     | 3148  |
| IPI00219173 | 482  | 490  |     | ->1 | 9156  |
| IPI00219365 | 388  | 400  | ->1 |     | 4478  |
| IPI00219368 | 343  | 343  | 1-> | 1-> | 7090  |
| IPI00219420 | 336  | 340  | ->1 | ->1 | 9126  |
| IPI00219420 | 336  | 342  | ->1 | ->1 | 9126  |
| IPI00219919 | 28   | 27   |     | ->1 | 55929 |
| IPI00219919 | 35   | 27   | ->1 | ->1 | 55929 |
| IPI00219919 | 35   | 28   |     | ->1 | 55929 |
| IPI00219919 | 36   | 27   | ->1 | ->1 | 55929 |
| IPI00219919 | 36   | 28   | ->1 | ->1 | 55929 |
| IPI00219919 | 37   | 27   | ->1 | ->1 | 55929 |
| IPI00219919 | 37   | 28   |     | ->1 | 55929 |
| IPI00220484 | 82   | 82   | 1-> | 1-> | 10473 |
| IPI00220827 | 4    | 4    | 1-> | 1-> | 9168  |
| IPI00220827 | 17   | 26   | ->1 | ->1 | 9168  |
| IPI00220827 | 39   | 39   | 1-> | 1-> | 9168  |
| IPI00220828 | 4    | 4    | 1-> | 1-> | 7114  |
| IPI00220828 | 12   | 32   | ->1 |     | 7114  |
| IPI00220828 | 17   | 26   | ->1 | ->1 | 7114  |
| IPI00220828 | 17   | 32   | ->1 |     | 7114  |
| IPI00220828 | 26   | 32   | ->1 |     | 7114  |
| IPI00220828 | 32   | 26   | ->1 | ->1 | 7114  |
| IPI00220828 | 39   | 32   | ->1 | ->1 | 7114  |
| IPI00220828 | 39   | 39   | 1-> | 1-> | 7114  |
| IPI00221106 | 275  | 268  | ->1 | ->1 | 10992 |
| IPI00234252 | 359  | 359  | 1-> | 1-> | 6599  |
| IPI00234446 | 357  | 357  | 1-> | 1-> | 1386  |
| IPI00234446 | 374  | 382  |     | ->1 | 1386  |
| IPI00256605 | 302  | 302  | 1-> | 1-> | 51322 |
| IPI00256605 | 302  | 306  | 1-> |     | 51322 |
| IPI00289034 | 397  | 380  | ->1 |     | 84444 |
| IPI00289034 | 398  | 380  | ->1 |     | 84444 |
| IPI00289034 | 401  | 380  | ->1 |     | 84444 |
| IPI00289344 | 1336 | 1366 | 1-> |     | 9611  |
| IPI00289344 | 1412 | 1389 | 1-> |     | 9611  |
| IPI00289773 | 265  | 275  | ->1 | ->1 | 1051  |
| IPI00289776 | 2422 | 2409 | 1-> | 1-> | 23077 |
| IPI00289776 | 2422 | 2420 | ->1 | ->1 | 23077 |
| IPI00289819 | 2352 | 2355 | ->1 | ->1 | 3482  |
| IPI00290204 | 118  | 87   | 1-> |     | 6625  |

Table S5

|             |      |      |     |     |        |
|-------------|------|------|-----|-----|--------|
| IPI00290547 | 1228 | 1231 | ->1 | ->1 | 4863   |
| IPI00290548 | 119  | 122  | ->1 | ->1 | 1870   |
| IPI00290548 | 119  | 127  | ->1 | ->1 | 1870   |
| IPI00290548 | 122  | 127  | ->1 | ->1 | 1870   |
| IPI00290548 | 127  | 122  |     | ->1 | 1870   |
| IPI00290652 | 1339 | 1339 | 1-> | 1-> | 51773  |
| IPI00291608 | 64   | 64   | 1-> | 1-> | 57092  |
| IPI00291608 | 152  | 150  | ->1 | ->1 | 57092  |
| IPI00291939 | 282  | 285  | ->1 | ->1 | 8243   |
| IPI00291939 | 713  | 713  | 1-> | 1-> | 8243   |
| IPI00292025 | 161  | 161  | 1-> | 1-> | 1050   |
| IPI00292059 | 384  | 410  | ->1 |     | 9972   |
| IPI00292059 | 1120 | 1120 | 1-> | 1-> | 9972   |
| IPI00292537 | 432  | 442  | ->1 | ->1 | 4790   |
| IPI00292537 | 441  | 441  | 1-> | 1-> | 4790   |
| IPI00292537 | 441  | 442  | ->1 | ->1 | 4790   |
| IPI00292537 | 441  | 449  | ->1 | ->1 | 4790   |
| IPI00292537 | 442  | 441  |     | 1-> | 4790   |
| IPI00292537 | 442  | 449  | ->1 | ->1 | 4790   |
| IPI00292753 | 238  | 221  | 1-> |     | 26130  |
| IPI00292753 | 238  | 233  | 1-> |     | 26130  |
| IPI00292771 | 379  | 373  | 1-> |     | 4926   |
| IPI00292771 | 379  | 379  | 1-> | 1-> | 4926   |
| IPI00292771 | 379  | 386  | 1-> |     | 4926   |
| IPI00292771 | 1511 | 1511 | 1-> | 1-> | 4926   |
| IPI00292771 | 1511 | 1518 | 1-> |     | 4926   |
| IPI00293331 | 46   | 40   | ->1 | ->1 | 10940  |
| IPI00293331 | 46   | 46   | 1-> | 1-> | 10940  |
| IPI00293845 | 1274 | 1264 | ->1 | ->1 | 55183  |
| IPI00293845 | 1274 | 1266 |     | ->1 | 55183  |
| IPI00293845 | 1274 | 1279 | ->1 | ->1 | 55183  |
| IPI00294186 | 264  | 259  | ->1 | ->1 | 114294 |
| IPI00294211 | 260  | 260  | 1-> | 1-> | 9785   |
| IPI00294211 | 521  | 504  | 1-> |     | 9785   |
| IPI00294211 | 521  | 510  | 1-> |     | 9785   |
| IPI00294211 | 521  | 512  | ->1 | ->1 | 9785   |
| IPI00294211 | 522  | 504  | 1-> |     | 9785   |
| IPI00294211 | 522  | 510  | 1-> |     | 9785   |
| IPI00294211 | 522  | 512  | ->1 | ->1 | 9785   |
| IPI00294603 | 1282 | 1284 | 1-> | 1-> | 7750   |
| IPI00294742 | 325  | 329  |     | ->1 | 51574  |
| IPI00296337 | 2702 | 2703 |     | ->1 | 5591   |
| IPI00296337 | 2703 | 2702 |     | ->1 | 5591   |
| IPI00296830 | 297  | 287  | ->1 | ->1 | 7798   |
| IPI00296830 | 297  | 289  | ->1 | ->1 | 7798   |
| IPI00297931 | 513  | 506  | 1-> | 1-> | 11276  |
| IPI00297931 | 513  | 524  | 1-> | 1-> | 11276  |
| IPI00297931 | 744  | 733  | ->1 |     | 11276  |
| IPI00298301 | 1877 | 1880 |     | ->1 | 4621   |
| IPI00298520 | 274  | 282  | ->1 | ->1 | 372    |
| IPI00299095 | 447  | 439  | 1-> |     | 6643   |
| IPI00299095 | 469  | 439  | 1-> |     | 6643   |

Table S5

|             |     |     |     |     |        |
|-------------|-----|-----|-----|-----|--------|
| IPI00299147 | 11  | 5   | ->1 | ->1 | 6612   |
| IPI00299147 | 11  | 7   | ->1 | ->1 | 6612   |
| IPI00299147 | 11  | 11  | 1-> | 1-> | 6612   |
| IPI00299149 | 11  | 7   | ->1 | ->1 | 6613   |
| IPI00299149 | 11  | 11  | 1-> | 1-> | 6613   |
| IPI00299263 | 228 | 236 |     | ->1 | 26286  |
| IPI00299263 | 229 | 236 |     | ->1 | 26286  |
| IPI00299417 | 24  | 24  | 1-> | 1-> | 8563   |
| IPI00299463 | 441 | 443 |     | ->1 | 4683   |
| IPI00299463 | 504 | 502 |     | ->1 | 4683   |
| IPI00299463 | 544 | 568 | ->1 | ->1 | 4683   |
| IPI00299463 | 665 | 653 | 1-> | 1-> | 4683   |
| IPI00299463 | 690 | 652 | ->1 | ->1 | 4683   |
| IPI00299463 | 698 | 652 | ->1 | ->1 | 4683   |
| IPI00299465 | 259 | 244 | 1-> |     | 54585  |
| IPI00299465 | 259 | 263 |     | ->1 | 54585  |
| IPI00299465 | 259 | 264 |     | ->1 | 54585  |
| IPI00299465 | 263 | 244 | 1-> |     | 54585  |
| IPI00299465 | 263 | 259 |     | ->1 | 54585  |
| IPI00299465 | 263 | 264 |     | ->1 | 54585  |
| IPI00299608 | 310 | 310 | 1-> | 1-> | 5707   |
| IPI00299608 | 310 | 319 | 1-> |     | 5707   |
| IPI00300631 | 294 | 294 | 1-> | 1-> | 6294   |
| IPI00300631 | 475 | 481 | ->1 | ->1 | 6294   |
| IPI00300631 | 475 | 483 | ->1 | ->1 | 6294   |
| IPI00301058 | 283 | 252 | ->1 | ->1 | 7408   |
| IPI00301364 | 163 | 142 | 1-> |     | 6500   |
| IPI00302829 | 896 | 896 | 1-> | 1-> | 5925   |
| IPI00302829 | 896 | 900 | ->1 | ->1 | 5925   |
| IPI00303402 | 112 | 105 | ->1 | ->1 | 51808  |
| IPI00303402 | 183 | 184 |     | ->1 | 51808  |
| IPI00303402 | 183 | 188 | ->1 |     | 51808  |
| IPI00304527 | 418 | 417 |     | ->1 | 222584 |
| IPI00304596 | 11  | 5   | ->1 |     | 4841   |
| IPI00304596 | 64  | 60  |     | ->1 | 4841   |
| IPI00304740 | 472 | 463 | 1-> | 1-> | 6453   |
| IPI00304740 | 472 | 488 | 1-> |     | 6453   |
| IPI00304740 | 472 | 489 | 1-> |     | 6453   |
| IPI00304740 | 475 | 463 | 1-> | 1-> | 6453   |
| IPI00304740 | 475 | 488 | 1-> |     | 6453   |
| IPI00304740 | 475 | 489 | 1-> |     | 6453   |
| IPI00304740 | 495 | 463 | 1-> | 1-> | 6453   |
| IPI00304740 | 495 | 488 | 1-> | 1-> | 6453   |
| IPI00304740 | 495 | 489 | 1-> |     | 6453   |
| IPI00306043 | 245 | 281 | 1-> |     | 51441  |
| IPI00306048 | 135 | 135 | 1-> | 1-> | 83858  |
| IPI00306380 | 79  | 68  | ->1 |     | 26354  |
| IPI00306380 | 79  | 75  | ->1 |     | 26354  |
| IPI00306959 | 296 | 331 | ->1 | ->1 | 3855   |
| IPI00328306 | 764 | 764 | 1-> | 1-> | 9877   |
| IPI00328319 | 4   | 4   | 1-> | 1-> | 5928   |
| IPI00328798 | 36  | 43  | ->1 | ->1 | 283149 |

Table S5

|             |      |      |     |     |        |
|-------------|------|------|-----|-----|--------|
| IPI00328798 | 36   | 49   | ->1 | ->1 | 283149 |
| IPI00328798 | 137  | 137  | 1-> | 1-> | 283149 |
| IPI00328918 | 33   | 21   | 1-> |     | 84062  |
| IPI00329132 | 233  | 233  | 1-> | 1-> | 79969  |
| IPI00329389 | 239  | 239  |     | 1-> | 6128   |
| IPI00329791 | 263  | 256  |     | ->1 | 9879   |
| IPI00333533 | 631  | 639  |     | ->1 | 367    |
| IPI00333533 | 633  | 639  | ->1 | ->1 | 367    |
| IPI00333533 | 634  | 639  |     | ->1 | 367    |
| IPI00333533 | 634  | 659  | 1-> |     | 367    |
| IPI00333541 | 994  | 982  |     | 1-> | 2316   |
| IPI00333541 | 994  | 987  |     | ->1 | 2316   |
| IPI00333913 | 1057 | 1063 | 1-> |     | 51594  |
| IPI00335001 | 81   | 81   | 1-> | 1-> | 10169  |
| IPI00337315 | 1571 | 1567 | ->1 | ->1 | 5930   |
| IPI00337315 | 1571 | 1571 | 1-> | 1-> | 5930   |
| IPI00337386 | 233  | 207  | 1-> | 1-> | 55660  |
| IPI00374657 | 125  | 138  | 1-> | 1-> | 9218   |
| IPI00375127 | 291  | 291  | 1-> | 1-> | 7458   |
| IPI00375127 | 291  | 294  |     | ->1 | 7458   |
| IPI00377245 | 2196 | 2196 | 1-> | 1-> | 8085   |
| IPI00382470 | 346  | 346  | 1-> | 1-> | 3320   |
| IPI00382470 | 414  | 414  | 1-> | 1-> | 3320   |
| IPI00382470 | 414  | 416  |     | ->1 | 3320   |
| IPI00382470 | 416  | 414  | 1-> |     | 3320   |
| IPI00382470 | 436  | 414  | 1-> | 1-> | 3320   |
| IPI00382470 | 668  | 668  | 1-> | 1-> | 3320   |
| IPI00384028 | 657  | 666  | ->1 | ->1 | 10914  |
| IPI00384028 | 666  | 673  | ->1 | ->1 | 10914  |
| IPI00384028 | 752  | 731  | 1-> |     | 10914  |
| IPI00384028 | 756  | 731  | 1-> |     | 10914  |
| IPI00384202 | 552  | 545  | 1-> | 1-> | 221037 |
| IPI00384857 | 8    | 8    | 1-> | 1-> | 51155  |
| IPI00384972 | 180  | 180  | 1-> | 1-> | 284058 |
| IPI00386448 | 310  | 303  | ->1 | ->1 | 5970   |
| IPI00386448 | 310  | 314  |     | ->1 | 5970   |
| IPI00386448 | 310  | 315  |     | ->1 | 5970   |
| IPI00386448 | 314  | 315  |     | ->1 | 5970   |
| IPI00386448 | 315  | 314  |     | ->1 | 5970   |
| IPI00387159 | 164  | 165  |     | ->1 | 54556  |
| IPI00387159 | 164  | 167  | ->1 | ->1 | 54556  |
| IPI00387159 | 165  | 164  |     | ->1 | 54556  |
| IPI00387159 | 165  | 167  |     | ->1 | 54556  |
| IPI00395627 | 8    | 8    | 1-> | 1-> | 27101  |
| IPI00395627 | 8    | 14   |     | ->1 | 27101  |
| IPI00396008 | 582  | 582  | 1-> | 1-> | 144108 |
| IPI00396089 | 85   | 85   | 1-> | 1-> | 8315   |
| IPI00396154 | 296  | 303  | 1-> |     | 51105  |
| IPI00397376 | 357  | 352  | ->1 | ->1 | 79882  |
| IPI00397383 | 7    | 25   | 1-> | 1-> | 23095  |
| IPI00398406 | 249  | 254  | ->1 | ->1 | 4205   |
| IPI00398406 | 282  | 282  | 1-> | 1-> | 4205   |

Table S5

|             |      |      |     |     |       |
|-------------|------|------|-----|-----|-------|
| IPI00398406 | 403  | 403  | 1-> | 1-> | 4205  |
| IPI00399266 | 168  | 201  | ->1 | ->1 | 7165  |
| IPI00409671 | 25   | 26   | ->1 | ->1 | 11325 |
| IPI00409671 | 25   | 30   | ->1 | ->1 | 11325 |
| IPI00410039 | 235  | 240  |     | ->1 | 51535 |
| IPI00410039 | 240  | 235  |     | ->1 | 51535 |
| IPI00410351 | 1352 | 1382 | 1-> |     | 9611  |
| IPI00410351 | 1428 | 1405 | 1-> |     | 9611  |
| IPI00410590 | 291  | 294  |     | ->1 | 26065 |
| IPI00410618 | 108  | 102  |     | ->1 | 57456 |
| IPI00410693 | 140  | 145  | ->1 |     | 26135 |
| IPI00411559 | 381  | 387  | ->1 | ->1 | 10051 |
| IPI00411559 | 381  | 389  | ->1 | ->1 | 10051 |
| IPI00411614 | 962  | 993  | 1-> |     | 11169 |
| IPI00411614 | 1127 | 1120 | 1-> | 1-> | 11169 |
| IPI00412441 | 253  | 253  | 1-> | 1-> | 23063 |
| IPI00412441 | 689  | 682  | 1-> |     | 23063 |
| IPI00413611 | 712  | 700  | 1-> | 1-> | 7150  |
| IPI00414127 | 150  | 154  | ->1 |     | 5902  |
| IPI00414127 | 183  | 173  | ->1 | ->1 | 5902  |
| IPI00414127 | 183  | 183  | 1-> | 1-> | 5902  |
| IPI00414676 | 284  | 286  |     | ->1 | 3326  |
| IPI00414872 | 698  | 698  | 1-> | 1-> | 9701  |
| IPI00418238 | 7    | 6    |     | ->1 | 3268  |
| IPI00418238 | 173  | 173  | 1-> | 1-> | 3268  |
| IPI00418471 | 139  | 143  |     | ->1 | 7431  |
| IPI00419249 | 206  | 230  | 1-> | 1-> | 5684  |
| IPI00419249 | 230  | 230  | 1-> | 1-> | 5684  |
| IPI00419249 | 230  | 238  | ->1 | ->1 | 5684  |
| IPI00419249 | 238  | 230  | 1-> | 1-> | 5684  |
| IPI00419249 | 238  | 241  | ->1 | ->1 | 5684  |
| IPI00419880 | 249  | 249  |     | 1-> | 6189  |
| IPI00419979 | 38   | 38   | 1-> | 1-> | 5062  |
| IPI00439548 | 392  | 395  | ->1 | ->1 | 54880 |
| IPI00440484 | 1096 | 1096 | 1-> | 1-> | 5187  |
| IPI00440727 | 1111 | 1114 | 1-> | 1-> | 23476 |
| IPI00440727 | 1114 | 1114 | 1-> | 1-> | 23476 |
| IPI00444646 | 647  | 640  | 1-> | 1-> | 11276 |
| IPI00444646 | 647  | 658  | 1-> | 1-> | 11276 |
| IPI00444646 | 878  | 867  | ->1 |     | 11276 |
| IPI00446767 | 237  | 203  |     | 1-> | 7091  |
| IPI00446767 | 237  | 237  | 1-> | 1-> | 7091  |
| IPI00446767 | 281  | 287  |     | ->1 | 7091  |
| IPI00446986 | 3    | 3    | 1-> | 1-> | 2533  |
| IPI00446986 | 149  | 149  | 1-> | 1-> | 2533  |
| IPI00448465 | 39   | 42   | ->1 | ->1 | 23253 |
| IPI00449049 | 105  | 108  |     | ->1 | 142   |
| IPI00449049 | 521  | 524  |     | ->1 | 142   |
| IPI00455210 | 1671 | 1645 | ->1 | ->1 | 1108  |
| IPI00455210 | 1671 | 1671 | 1-> | 1-> | 1108  |
| IPI00455518 | 767  | 770  | ->1 | ->1 | 22880 |
| IPI00455518 | 767  | 771  | ->1 | ->1 | 22880 |

Table S5

|             |      |      |  |     |        |
|-------------|------|------|--|-----|--------|
| IPI00455623 | 136  | 166  |  | ->1 | 84779  |
| IPI00456970 | 556  | 547  |  | ->1 | 8621   |
| IPI00457284 | 1142 | 1134 |  | ->1 | 23131  |
| IPI00470779 | 194  | 188  |  | 1-> | 200081 |
| IPI00470779 | 195  | 188  |  | 1-> | 200081 |
| IPI00470891 | 434  | 434  |  | 1-> | 7812   |
| IPI00470891 | 434  | 442  |  | ->1 | 7812   |
| IPI00479545 | 470  | 470  |  | 1-> | 55818  |
| IPI00479545 | 470  | 485  |  | 1-> | 55818  |
| IPI00479571 | 33   | 21   |  | 1-> | 84062  |
| IPI00479997 | 9    | 9    |  | 1-> | 3925   |
| IPI00479997 | 80   | 70   |  | ->1 | 3925   |
| IPI00479997 | 80   | 75   |  | ->1 | 3925   |
| IPI00479997 | 80   | 80   |  | 1-> | 3925   |
| IPI00479997 | 95   | 95   |  | 1-> | 3925   |
| IPI00479997 | 100  | 100  |  | 1-> | 3925   |
| IPI00479997 | 100  | 104  |  | ->1 | 3925   |
| IPI00479997 | 119  | 126  |  |     | 3925   |
| IPI00479997 | 128  | 126  |  | ->1 | 3925   |
| IPI00514053 | 233  | 241  |  | ->1 | 372    |
| IPI00514648 | 604  | 596  |  | 1-> | 6595   |
| IPI00514648 | 1555 | 1564 |  | ->1 | 6595   |
| IPI00549205 | 270  | 236  |  | ->1 | 10111  |
| IPI00549205 | 270  | 279  |  | ->1 | 10111  |
| IPI00549248 | 229  | 248  |  | ->1 | 4869   |
| IPI00549248 | 230  | 248  |  | ->1 | 4869   |
| IPI00549248 | 257  | 248  |  | ->1 | 4869   |
| IPI00549248 | 267  | 248  |  | ->1 | 4869   |
| IPI00549248 | 273  | 248  |  | ->1 | 4869   |
| IPI00549955 | 377  | 377  |  | 1-> | 55329  |
| IPI00550021 | 366  | 399  |  | ->1 | 6122   |
| IPI00550021 | 373  | 399  |  | ->1 | 6122   |
| IPI00552897 | 812  | 812  |  | 1-> | 9656   |
| IPI00554579 | 443  | 443  |  | 1-> | 256714 |
| IPI00554648 | 347  | 347  |  | 1-> | 3856   |
| IPI00554648 | 347  | 352  |  | ->1 | 3856   |
| IPI00554648 | 472  | 472  |  | 1-> | 3856   |
| IPI00554761 | 3    | 5    |  | ->1 | 643790 |
| IPI00554761 | 14   | 5    |  | ->1 | 643790 |
| IPI00604620 | 9    | 15   |  | ->1 | 4691   |
| IPI00604620 | 9    | 16   |  | ->1 | 4691   |
| IPI00604620 | 15   | 16   |  | ->1 | 4691   |
| IPI00604620 | 572  | 577  |  | 1-> | 4691   |
| IPI00604620 | 577  | 577  |  | 1-> | 4691   |
| IPI00641743 | 2050 | 2056 |  | ->1 | 3054   |
| IPI00642550 | 649  | 649  |  | 1-> | 728118 |
| IPI00642971 | 383  | 425  |  | ->1 | 1936   |
| IPI00642971 | 483  | 483  |  | 1-> | 1936   |
| IPI00643435 | 183  | 183  |  | 1-> | 55210  |
| IPI00643465 | 2884 | 2884 |  | 1-> | 10579  |
| IPI00643465 | 2884 | 2912 |  | ->1 | 10579  |
| IPI00643722 | 997  | 974  |  | 1-> | 8289   |

Table S5

|             |      |      |     |     |        |
|-------------|------|------|-----|-----|--------|
| IPI00643722 | 1007 | 974  |     | 1-> | 8289   |
| IPI00643722 | 1007 | 1007 | 1-> | 1-> | 8289   |
| IPI00643722 | 1007 | 1010 | 1-> |     | 8289   |
| IPI00643722 | 1612 | 1615 | ->1 | ->1 | 8289   |
| IPI00643722 | 1905 | 1905 | 1-> | 1-> | 8289   |
| IPI00643722 | 1905 | 1938 | ->1 |     | 8289   |
| IPI00643920 | 6    | 6    |     | 1-> | 7086   |
| IPI00643920 | 6    | 11   |     | ->1 | 7086   |
| IPI00644055 | 103  | 114  | 1-> |     | 10236  |
| IPI00644055 | 103  | 126  | 1-> |     | 10236  |
| IPI00644712 | 539  | 542  | ->1 |     | 2547   |
| IPI00644712 | 539  | 565  | 1-> | 1-> | 2547   |
| IPI00644712 | 542  | 565  | 1-> | 1-> | 2547   |
| IPI00644712 | 544  | 539  |     | ->1 | 2547   |
| IPI00644712 | 544  | 542  | ->1 | ->1 | 2547   |
| IPI00644712 | 544  | 553  | ->1 | ->1 | 2547   |
| IPI00644712 | 544  | 565  | 1-> | 1-> | 2547   |
| IPI00644712 | 553  | 565  | 1-> | 1-> | 2547   |
| IPI00644712 | 556  | 553  | ->1 | ->1 | 2547   |
| IPI00644712 | 556  | 556  | 1-> | 1-> | 2547   |
| IPI00644712 | 556  | 565  | 1-> | 1-> | 2547   |
| IPI00645616 | 530  | 540  | ->1 | ->1 | 414189 |
| IPI00646058 | 475  | 481  | ->1 | ->1 | 6294   |
| IPI00646058 | 475  | 483  | ->1 | ->1 | 6294   |
| IPI00646645 | 1647 | 1647 | 1-> | 1-> | 23064  |
| IPI00647217 | 51   | 61   | 1-> | 1-> | 23517  |
| IPI00647217 | 51   | 79   | 1-> |     | 23517  |
| IPI00647217 | 78   | 61   | 1-> | 1-> | 23517  |
| IPI00647217 | 78   | 78   | 1-> | 1-> | 23517  |
| IPI00647217 | 78   | 79   | 1-> | 1-> | 23517  |
| IPI00647217 | 79   | 61   | 1-> | 1-> | 23517  |
| IPI00647217 | 79   | 78   | 1-> | 1-> | 23517  |
| IPI00647217 | 79   | 79   | 1-> | 1-> | 23517  |
| IPI00657642 | 127  | 111  | 1-> | 1-> | 253635 |
| IPI00657642 | 127  | 123  | ->1 | ->1 | 253635 |
| IPI00737057 | 1024 | 1031 | ->1 | ->1 | 9498   |
| IPI00737057 | 1024 | 1039 | 1-> |     | 9498   |
| IPI00738216 | 1218 | 1211 |     | ->1 | 23379  |
| IPI00738216 | 1218 | 1218 | 1-> | 1-> | 23379  |
| IPI00738216 | 1218 | 1221 | 1-> |     | 23379  |
| IPI00740961 | 175  | 175  | 1-> | 1-> | 26173  |
| IPI00742682 | 312  | 290  | 1-> |     | 7175   |
| IPI00742682 | 312  | 299  | 1-> | 1-> | 7175   |
| IPI00742682 | 312  | 322  | ->1 | ->1 | 7175   |
| IPI00742682 | 315  | 290  | 1-> |     | 7175   |
| IPI00742682 | 315  | 299  | 1-> | 1-> | 7175   |
| IPI00742682 | 315  | 322  | ->1 | ->1 | 7175   |
| IPI00742682 | 345  | 340  | ->1 | ->1 | 7175   |
| IPI00742682 | 345  | 364  | 1-> |     | 7175   |
| IPI00742682 | 428  | 438  |     | ->1 | 7175   |
| IPI00742682 | 457  | 474  | ->1 |     | 7175   |
| IPI00743143 | 112  | 112  | 1-> | 1-> | 51147  |

Table S5

|             |      |      |     |     |        |
|-------------|------|------|-----|-----|--------|
| IPI00743509 | 168  | 171  | ->1 | ->1 | 1871   |
| IPI00743509 | 168  | 176  | ->1 | ->1 | 1871   |
| IPI00743509 | 171  | 176  | ->1 | ->1 | 1871   |
| IPI00743509 | 176  | 171  | ->1 | ->1 | 1871   |
| IPI00748532 | 619  | 616  | ->1 | ->1 | 8202   |
| IPI00748532 | 620  | 616  | ->1 | ->1 | 8202   |
| IPI00761080 | 154  | 154  | 1-> | 1-> | 23286  |
| IPI00761160 | 712  | 712  | 1-> | 1-> | 831    |
| IPI00782935 | 114  | 114  |     | 1-> | 84289  |
| IPI00783017 | 412  | 417  | 1-> |     | 9839   |
| IPI00783017 | 417  | 412  | ->1 | ->1 | 9839   |
| IPI00783017 | 417  | 417  | 1-> | 1-> | 9839   |
| IPI00784154 | 551  | 551  |     | 1-> | 3329   |
| IPI00784154 | 554  | 554  |     | 1-> | 3329   |
| IPI00784224 | 509  | 509  | 1-> | 1-> | 51663  |
| IPI00785113 | 568  | 548  | ->1 |     | 9208   |
| IPI00785113 | 568  | 606  |     | 1-> | 9208   |
| IPI00785113 | 570  | 548  | ->1 |     | 9208   |
| IPI00785113 | 570  | 606  |     | 1-> | 9208   |
| IPI00790342 | 240  | 240  |     | 1-> | 6128   |
| IPI00790503 | 1245 | 1240 | ->1 | ->1 | 4628   |
| IPI00790503 | 1245 | 1247 | ->1 | ->1 | 4628   |
| IPI00792984 | 45   | 45   | 1-> | 1-> | 10776  |
| IPI00792984 | 45   | 50   | ->1 | ->1 | 10776  |
| IPI00792984 | 45   | 52   | ->1 | ->1 | 10776  |
| IPI00792984 | 50   | 52   | ->1 | ->1 | 10776  |
| IPI00792984 | 128  | 121  | ->1 |     | 10776  |
| IPI00793201 | 57   | 87   | 1-> | 1-> | 9255   |
| IPI00794779 | 990  | 998  | ->1 | ->1 | 10721  |
| IPI00797574 | 473  | 464  | ->1 | ->1 | 259282 |
| IPI00797574 | 2430 | 2430 | 1-> | 1-> | 259282 |
| IPI00797574 | 2430 | 2433 | ->1 | ->1 | 259282 |
| IPI00797574 | 2430 | 2450 | 1-> | 1-> | 259282 |
| IPI00798011 | 11   | 5    | ->1 | ->1 | 6612   |
| IPI00798011 | 11   | 7    | ->1 | ->1 | 6612   |
| IPI00798011 | 11   | 11   | 1-> | 1-> | 6612   |
| IPI00807625 | 132  | 166  | 1-> | 1-> | 23048  |
| IPI00815642 | 30   | 30   | 1-> | 1-> | 7114   |
| IPI00815642 | 30   | 58   | ->1 |     | 7114   |
| IPI00815642 | 38   | 58   | ->1 |     | 7114   |
| IPI00815642 | 41   | 58   | ->1 |     | 7114   |
| IPI00815642 | 52   | 58   | ->1 | ->1 | 7114   |
| IPI00815642 | 58   | 52   | ->1 | ->1 | 7114   |
| IPI00815642 | 65   | 58   | ->1 | ->1 | 7114   |
| IPI00815642 | 65   | 65   | 1-> | 1-> | 7114   |
| IPI00815707 | 1685 | 1662 | ->1 |     | 404734 |
| IPI00815713 | 155  | 146  |     | ->1 | 6949   |
| IPI00815713 | 155  | 159  | ->1 | ->1 | 6949   |
| IPI00815713 | 296  | 292  | ->1 |     | 6949   |
| IPI00815713 | 296  | 331  | ->1 |     | 6949   |
| IPI00815713 | 600  | 600  | 1-> | 1-> | 6949   |
| IPI00815713 | 755  | 746  | ->1 | ->1 | 6949   |



Table S5

|             |      |      |     |     |        |
|-------------|------|------|-----|-----|--------|
| IPI00815713 | 755  | 755  | 1-> | 1-> | 6949   |
| IPI00816288 | 32   | 26   | ->1 | ->1 | 7115   |
| IPI00816288 | 39   | 32   | ->1 | ->1 | 7115   |
| IPI00816288 | 39   | 39   | 1-> | 1-> | 7115   |
| IPI00816773 | 38   | 19   | 1-> |     | 84106  |
| IPI00816773 | 38   | 34   | ->1 | ->1 | 84106  |
| IPI00816773 | 38   | 35   | ->1 | ->1 | 84106  |
| IPI00816773 | 43   | 19   | 1-> |     | 84106  |
| IPI00816773 | 43   | 46   | ->1 |     | 84106  |
| IPI00829826 | 1354 | 1382 | ->1 |     | 5469   |
| IPI00829826 | 1502 | 1474 | 1-> |     | 5469   |
| IPI00829826 | 1504 | 1474 | 1-> |     | 5469   |
| IPI00844214 | 91   | 95   |     | ->1 | 56259  |
| IPI00844214 | 91   | 102  | 1-> | 1-> | 56259  |
| IPI00844508 | 579  | 577  | 1-> |     | 57530  |
| IPI00844508 | 579  | 579  | 1-> | 1-> | 57530  |
| IPI00844508 | 579  | 586  |     | ->1 | 57530  |
| IPI00845355 | 967  | 970  | ->1 | ->1 | 546    |
| IPI00845355 | 967  | 971  | ->1 | ->1 | 546    |
| IPI00845508 | 222  | 228  | ->1 | ->1 | 57597  |
| IPI00852685 | 1057 | 1083 | 1-> |     | 1729   |
| IPI00852685 | 1103 | 1083 | 1-> |     | 1729   |
| IPI00853077 | 910  | 917  | 1-> |     | 51105  |
| IPI00853077 | 917  | 910  | ->1 | ->1 | 51105  |
| IPI00853077 | 917  | 917  | 1-> | 1-> | 51105  |
| IPI00854642 | 1211 | 1217 | 1-> |     | 23244  |
| IPI00854642 | 1211 | 1219 | 1-> |     | 23244  |
| IPI00855998 | 1673 | 1673 | 1-> | 1-> | 1063   |
| IPI00855998 | 2875 | 2881 | ->1 | ->1 | 1063   |
| IPI00856045 | 1510 | 1510 | 1-> | 1-> | 113146 |
| IPI00867714 | 171  | 180  | ->1 | ->1 | 124801 |
| IPI00872359 | 235  | 269  | ->1 | ->1 | 1639   |
| IPI00873495 | 1126 | 1134 | ->1 | ->1 | 10721  |
| IPI00873518 | 61   | 61   | 1-> | 1-> | 8379   |
| IPI00873518 | 61   | 71   | ->1 | ->1 | 8379   |
| IPI00876931 | 47   | 47   | 1-> | 1-> | 26173  |
| IPI00878910 | 38   | 47   | ->1 | ->1 | 23338  |
| IPI00878910 | 38   | 48   |     | ->1 | 23338  |
| IPI00888429 | 527  | 527  | 1-> | 1-> | 283008 |
| IPI00902533 | 317  | 309  | 1-> | 1-> | 9883   |
| IPI00915324 | 118  | 112  | ->1 |     | 7168   |
| IPI00915324 | 118  | 128  | ->1 |     | 7168   |
| IPI00916332 | 758  | 761  | ->1 | ->1 | 58508  |
| IPI00916332 | 2009 | 2009 | 1-> | 1-> | 58508  |
| IPI00916332 | 2809 | 2802 | ->1 | ->1 | 58508  |
| IPI00916332 | 2809 | 2814 | ->1 | ->1 | 58508  |
| IPI00916332 | 2814 | 2809 | ->1 |     | 58508  |
| IPI00916332 | 2814 | 2823 | ->1 | ->1 | 58508  |
| IPI00916332 | 2832 | 2823 | ->1 | ->1 | 58508  |
| IPI00916332 | 2832 | 2832 | 1-> | 1-> | 58508  |
| IPI00916332 | 3714 | 3714 | 1-> | 1-> | 58508  |
| IPI00916332 | 3714 | 3719 | ->1 | ->1 | 58508  |

Table S5

|             |     |     |     |     |        |
|-------------|-----|-----|-----|-----|--------|
| IPI00921844 | 264 | 303 |     | 1-> | 701    |
| IPI00925255 | 28  | 28  | 1-> | 1-> | 222194 |
| IPI00926625 | 272 | 265 | ->1 | ->1 | 7791   |
| IPI00926625 | 272 | 279 | ->1 | ->1 | 7791   |
| IPI00930688 | 40  | 40  | 1-> | 1-> | 10376  |
| IPI00937615 | 212 | 220 | ->1 | ->1 | 64852  |
| IPI00939238 | 51  | 51  | 1-> | 1-> | 861    |
| IPI00939238 | 51  | 70  | 1-> |     | 861    |
| IPI00939238 | 70  | 70  | 1-> | 1-> | 861    |
| IPI00940437 | 135 | 145 |     | ->1 | 57511  |
| IPI00940535 | 61  | 61  | 1-> | 1-> | 8379   |
| IPI00940535 | 61  | 71  | ->1 | ->1 | 8379   |
| IPI00940685 | 18  | 8   | ->1 | ->1 | 9410   |
| IPI00941161 | 815 | 810 | 1-> |     | 8615   |
| IPI00941161 | 815 | 815 | 1-> | 1-> | 8615   |
| IPI00941161 | 815 | 821 | 1-> |     | 8615   |
| IPI00941161 | 815 | 827 | 1-> |     | 8615   |
| IPI00941972 | 40  | 41  |     | ->1 | 7008   |
| IPI00942979 | 6   | 6   |     | 1-> | 7086   |
| IPI00942979 | 6   | 11  |     | ->1 | 7086   |

Table S5

| Symbol  | Seq                   |
|---------|-----------------------|
| COG2    | -----meKsrmlpKgpdp    |
| COG2    | -meksrmlpKgpdtlcfdkd  |
| RPL5    | vtpdmmeemyKkahaairnp  |
| NFE2L2  | veleqldhIKdekekllkek  |
| NFE2L2  | veleqldhIKdekekllkek  |
| NFE2L2  | vfsmlrdedgKpypseyslq  |
| NFE2L2  | vfsmlrdedgKpypseyslq  |
| NFE2L2  | vfsmlrdedgKpypseyslq  |
| NCOR2   | aaelavdtgKaeevKsect   |
| NCOR2   | vdgkaeevKsecteaeeg    |
| NCOR2   | cteeaeegpaKgkdaeaat   |
| NCOR2   | sdphrektqsKpfsiqelr   |
| HTT     | gsscspvlsrKqkgkvllgee |
| HTT     | scspvlsrkqKgkvllgeea  |
| XRCC1   | lnqeekKtpsKppaqlspvp  |
| XRCC1   | rkldlnqeekKtpskppaqls |
| HSPA4   | enegkmimqdKlekerndakn |
| HSPA4   | gkmimqdkleKerndaknave |
| HSPA5   | ayslknqigdKeklggklsse |
| HSPA5   | nelesyayslKnqigdkekIg |
| HSPA5   | slknqigdkeKlggklssedk |
| HSPA5   | klggklssedKetmekaveek |
| HIF1A   | sdmkmTqlftKvesedtssl  |
| HIF1A   | dtsslfdklkKepdaltllap |
| IFI16   | spapstsstvKtegaeatpga |
| ARHGDIB | eedddeldsKlnykpppqks  |
| ARHGDIB | sklnykpppqKslkelqemdk |
| ARHGDIB | sklnykpppqKslkelqemdk |
| ARHGDIB | nykpppqkslKelqemdkdde |
| HSPA8   | kenkititndKgrlskedier |
| HSPA8   | titndkgrlsKediermvqea |
| HSPA8   | diermvqeaekyKaedekqrd |
| HSPA8   | ermvqeaekyKaedekqrdkv |
| HSPA8   | atvedeklqgKindedkqkil |
| HSPA8   | titndkgrlsKediermvqea |
| HSPA8   | eaekyKaedeKqrdkvsskns |
| HSPA8   | atvedeklqgKindedkqkil |
| HSPA8   | ermvqeaekyKaedekqrdkv |
| HSPA8   | ykaedekqrdKvssknslesy |
| HSPA8   | atvedeklqgKindedkqkil |
| HSPA8   | atvedeklqgKindedkqkil |
| MKI67   | psagkamltKpaggdekdk   |
| MKI67   | psagkamltKpaggdekdk   |
| MKI67   | ltpkpaggdeKdikafmgtpv |
| MKI67   | lktslgkvgvKeellavgklt |
| MKI67   | tddkitevscKspqdpvktp  |
| E2F1    | pgkgvkspeKsryetslnlt  |
| E2F1    | pgkgvkspeKsryetslnlt  |
| SAFB2   | skadslavvKrepaeqpgdg  |
| PFDN6   | iqkklqgeveKyqqlkdlsk  |
| PFDN6   | gevekyqqlqKdlsksmsgrq |

Table S5

|          |                        |
|----------|------------------------|
| SHOX     | fvsksfdqksKdgnngggggg  |
| BCLAF1   | ypdggdqetaKtgkflkrftd  |
| BCLAF1   | rnteeeglkYKskvslkgnre  |
| DMD      | sglyylsttvKemskkapsei  |
| MAML1    | hslgldslnkKrladsslhln  |
| MAML1    | hqlqqaakqKreqmlqnpqq   |
| MAML1    | sahqlqqaiaaKqkreqmlqnp |
| TP73     | eqqalnessaKngaaskrafk  |
| TP73     | eqqalnessaKngaaskrafk  |
| HGS      | yeqlnrkaegKatsttelppe  |
| PCM1     | psaserlpdeKvelfskmrvi  |
| AIMP1    | aklkkeieelKqeliquaeiqn |
| NOP58    | stlptcskkrKieqvdkedei  |
| CHGB     | psdsqvseevKtrhseksqre  |
| CHGB     | seevkrhseKsqredeeeee   |
| PIN4     | aasgsdsadkKaaggpkgggna |
| DDX24    | psslfskeapKrkavavseee  |
| YARS     | gehvfvkgyeKggpdeelkp   |
| LEF1     | dkarehpddgKhpdgglynkg  |
| MAFG     | krvtqkeeleKqkaelqgeve  |
| MAFG     | krvtqkeeleKqkaelqgeve  |
| MAFG     | vtqkeeleKqkaelqgevekl  |
| ACIN1    | qrlqpergspKkceaeaeapp  |
| DYNC1LI1 | asvspipagsKkidpnmkaga  |
| DYNC1LI1 | agskkidpnmKagatsegvla  |
| HSPA9    | iviqssgglKddienmvkna   |
| HSPA9    | lskddienmvKnaekyaeedr  |
| HSPA9    | iviqssgglKddienmvkna   |
| HSPA9    | aegiihdttetKmeefkdqlpa |
| HSPA9    | qlpadecknlKeeiskmrell  |
| HSPA9    | aslklfemayKkmaseregsg  |
| SMC2     | eeitptiqklKeerssyleyq  |
| SMC2     | ntksqsafdlKknlaceesk   |
| SMC2     | knlaceeskrKeleknmveds  |
| HIC1     | lpslpplpfqKleeaappsdp  |
| BRPF3    | reqdeksavKeelkywqlr    |
| TPX2     | dfhfrtderiKqhpknqeeyk  |
| TPX2     | kqhpknqeeyKevnftselrk  |
| SSB      | kplpevtdeyKndvknrsvyi  |
| SSB      | gkvqfqqkktKfasddehdeh  |
| MLL      | edaaplappiKpikpvtrnka  |
| EIF4A3   | tgsarkrllKeedmtkvefe   |
| SOX9     | ntfpggedlKkeseedkfpv   |
| SOX9     | qgpptpttpKtdvqpgkadl   |
| SOX9     | epgqsqrthiKteqlspshys  |
| PDIA4    | naaildesgkKfamepeefds  |
| IMMT     | evaarlaqqeKqeqvkiesla  |
| IMMT     | laqqekqeqvKieslaksled  |
| IMMT     | lalekqkleeKrafdsavaka  |
| IMMT     | dvlrvqeqelKsefeqnlsk   |
| PLAGL2   | qlgstsyldKlpkvevdsfl   |
| PLAGL2   | stsylpdklpKvevdsflael  |

Table S5

|           |                        |
|-----------|------------------------|
| IFNAR2    | ellsgpcerrKsplqdpfpee  |
| NRIP1     | lqqysrehalKtqnanqaase  |
| NRIP1     | amarlqengqKdvgsyqlpkg  |
| NRIP1     | tqslIntwdpKvpdvikedq   |
| NRIP1     | wdpkvpdviKedqdtksnsk   |
| NRIP1     | vtllqllghKneenveknts   |
| NRIP1     | vtllqllghKneenveknts   |
| NRIP1     | snhsmdltksKdppgekpaqn  |
| TRIM33    | scgssgrtaeKtslsfksdqv  |
| TRIM33    | rtaektslsfKsdqvkvkqep  |
| TRIM33    | tslsfksdqvKvkqepgtede  |
| ACOT7     | srqeqeeegrKryeaqkterm  |
| ACOT7     | srqeqeeegrKryeaqkterm  |
| TMF1      | eftqriaeaeKkvqlackerd  |
| BAT2      | kpptgplppsKepkkekclipg |
| SFPQ      | qlddedglpeKlaqknpmqyk  |
| SFPQ      | edglpeklaqKnpmqkeret   |
| CHAF1B    | tprrintplKtdtppssvpt   |
| IK        | eiererelaeKyrdrakerrd  |
| IK        | eekkrhsyfeKpkvddepmdv  |
| IK        | kkrsyfeKpkvddepmdvdk   |
| EIF4B     | qdsrsapepkKpeenpaskfs  |
| MPHOSPH1C | lekssvdqagKysktvasekl  |
| MPHOSPH1C | ssvdqagkysKtvaseklkql  |
| BCL6      | ivlnslnqnaKpegpeqaalg  |
| CDC37     | dseevreqkhKtfvekyekqi  |
| PDAP1     | mhlagkteqaKadlarlaiir  |
| EPRS      | vnpvpeaqeemKevakhpknpe |
| EPRS      | daavkqllslKaeykektgqe  |
| EPRS      | kqllslkaeyKektgqeykpg  |
| SNW1      | dlqrpdeeaiKeitektrval  |
| STIP1     | eakrtyeeglKheannpqlke  |
| TPM2      | aqerlatalqKleeaekaade  |
| UBTF      | edmtllecmKnnlpsndssk   |
| SARNP     | vptkglssdnKpmvnlDKlke  |
| SARNP     | sdnkpmvnlDKlkerarqrgl  |
| SHROOM2   | kakektvedlKseelareivg  |
| DOCK1     | cfkqlkekveKeygvrimps   |
| CHCHD3    | qleekdrvllKqdafykeqla  |
| DNAJB1    | rrqalryhpdKnkepgaeekf  |
| DNAJB1    | qalryhpdknKepgaeekfke  |
| DNAJB1    | dknkepgaeekfkeiaaaydv  |
| DNAJB1    | nkepgaeekfKeiaaaydvls  |
| DNAJB1    | qalryhpdknKepgaeekfke  |
| DNAJB1    | dknkepgaeekfkeiaaaydv  |
| DNAJB1    | nkepgaeekfKeiaaaydvls  |
| OCIAD1    | sppghyyqksKydssvsgqss  |
| RPS6KA1   | lqpskdegvlKeisithhvka  |
| SF3A1     | erkkeeekeKervayaqidw   |
| LETM1     | tgeekyveesKaskrltkrvq  |
| RCSD1     | fkvksplieKlqanltfdpa   |
| ACO2      | tdyltgtdgkKfrleapdade  |

Table S5

|         |                        |
|---------|------------------------|
| NCOA2   | ecpdqlgppspKrnTekrnreq |
| NCOA2   | srlhdskgqtKllqllttksd  |
| NCOA2   | adgqsrhdsKgqtkllqllt   |
| NCOA2   | pasntkliamKtekeemsfep  |
| NCOA2   | dsktdpasntKliamktekee  |
| NCOA2   | pasntkliamKtekeemsfep  |
| NCOA2   | ntkliamkteKeemsfepgdq  |
| EPC1    | etntsdksfsKdlsqilvnik  |
| BRD8    | vplpapemtvKqerldfeete  |
| BRD8    | erldfeetenKgihelvdire  |
| NCBP1   | leeqierlqeKvesaqseqkn  |
| MYH9    | dqncklakekKlledriaeft  |
| MYH9    | fttnlteeeeKskslaklknk  |
| MYH9    | eekskslaklKnkheamitdl  |
| MYH9    | eeeeakhnleKqiatlhaqva  |
| MYH9    | leglsqrheeKvaaydklekt  |
| MYH9    | ekvaaydkleKtktrlqqeld  |
| MYH9    | llaeektisaKyaeerdraea  |
| MYH9    | narqqlerqnKelkvklqeme  |
| MYH9    | ykasitaleaKiaqleeqldn  |
| MYH9    | qleeqldnetKerqaackqvr  |
| PPP5C   | dgalkraeelKtqandyfkak  |
| PPP5C   | dgalkraeelKtqandyfkak  |
| HCFC1   | qetskdssgtKpankrpmssp  |
| ARHGAP1 | wpsdempdfpKsddskssspe  |
| CALR    | dwdflppkKiKdpaskpedw   |
| CALR    | leddwdfppKkikdpaskp    |
| CALR    | eddwdfppKikdpaskpe     |
| CALR    | rakiddptdsKpedwdkpehi  |
| EP300   | slgmVqdaasKhkqIsellrs  |
| EP300   | gmVqdaaskhKqIsellrsgs  |
| EP300   | slgmVqdaasKhkqIsellrs  |
| EP300   | gmVqdaaskhKqIsellrsgs  |
| EP300   | snnlspfamdKkavpgggmpn  |
| EP300   | snnlspfamdKkavpgggmpn  |
| EP300   | nnlspfamdKkavpgggmpnm  |
| EP300   | tevnsqaiiaeKqpsqevkmea |
| EP300   | dtqpedisesKvedckmeste  |
| EP300   | tevnsqaiiaeKqpsqevkmea |
| EP300   | iaeKqpsqevKmeakmevdqp  |
| EP300   | dtqpedisesKvedckmeste  |
| EP300   | qpsqevkmeaKmevdqpepad  |
| EP300   | dtqpedisesKvedckmeste  |
| EP300   | dtqpedisesKvedckmeste  |
| EP300   | dtqpedisesKvedckmeste  |
| EP300   | erstelkteiKeeedqpstsa  |
| EP300   | dpsqpqtinKeqfskrkndt   |
| EP300   | qttinkeqfsKrKndtldpel  |
| EP300   | tinkeqfskrKndtldpelfv  |
| EP300   | fwpvnleesiKeleqeeeerK  |
| EP300   | fwpvnleesiKeleqeeeerK  |
| CDK12   | nsekhlvkdIKaaggtrdskpi |

Table S5

|         |                       |
|---------|-----------------------|
| CDK12   | dlkaqgtrdsKpialkeeivt |
| CDK12   | gtrdskpialKeeivtpkete |
| YWHAZ   | ieqktegaekKqqmareyrek |
| LMNA    | ayeaeldarkKtldsvakera |
| LMNA    | darktldsvaKerarlqls   |
| LMNA    | darktldsvaKerarlqls   |
| LMNA    | erarlqlsKvreefkelka   |
| LMNA    | lelskvreefKelkarntkke |
| LMNA    | darktldsvaKerarlqls   |
| LMNA    | erarlqlsKvreefkelka   |
| LMNA    | skvreefkelKarntkkegdl |
| LMNA    | etriveidngKqrefesrlad |
| LMNA    | qhedqveqykKelektysakl |
| LMNA    | kkelektysaKldnarqsaer |
| LMNA    | aqhedqveqyKkelektysak |
| LMNA    | qveqykkeleKtysakldnar |
| LMNA    | aldmeihayrKllegeeerlr |
| FGA     | ynrgdstfesKsykmadeags |
| FGA     | ynrgdstfesKsykmadeags |
| PSMC6   | ----madprdKalqdyrkll  |
| PSMC6   | prdkalqdyrKllehkeidg  |
| PSMC6   | qdyrkllhKeidgrlkelr   |
| PSMC6   | rdkalqdyrkKllehkeidgr |
| KAT2B   | ssgleanpgeKrkmtdshvle |
| KAT2B   | gleanpgekrKmtdshvleea |
| PML     | speqprpstsKavspphldgp |
| ROCK1   | evkhkhnlKvegerkeaqd   |
| ROCK1   | kvamcemekKlkeerearek  |
| ROCK1   | vamcemekKlkeerearekae |
| ROCK1   | tdkhqsieeaKsvamcemekk |
| CCNA2   | aftihvdeaeKeaqkkpaesq |
| CCNA2   | vdeaekeaqkKpaesqkiere |
| CCNA2   | eaqkkpaesqKieredalafn |
| MYST3   | qereleisvgKsvshenkeqd |
| SBNO1   | vrnamtsapsKdqvqldllk  |
| SBNO1   | sapskdqvqldllknnsine  |
| GLTSCR1 | asnlptlnvaKaassgpgkps |
| KIF15   | lekqlqetqtKndflksevhd |
| KIF15   | sleksrdsdkKvvadlmnqiq |
| TP53    | rrteenlrKkgephhelppg  |
| TP53    | phhelppgstKralpntsss  |
| TP53    | ntssspqpkKkpldgeyftl  |
| TP53    | ntssspqpkKkpldgeyftlq |
| TP53    | pnntssspqpkKkpldgeyft |
| TP53    | ntssspqpkKkpldgeyftlq |
| TP53    | pnntssspqpkKkpldgeyft |
| TP53    | ntssspqpkKkpldgeyftl  |
| TP53    | stsrhkkImfKtegpdsd--- |
| TP53    | stsrhkkImfKtegpdsd--- |
| SP3     | nadspadiriKeeepdpeewq |
| SF3B1   | erldpfadggKtpdpkmnart |
| SF3B1   | fadggktpdpKmnartymdvm |

Table S5

SF3B1 laekakagelKvvngaaasqp  
 SF3B1 etptpgaskrKsrwdetpasq  
 HCLS1 rfgverdrmdKsavghyvae  
 HCLS1 vgheyvaeveKhssqtdaakg  
 HCLS1 kygverdradKsavgfdykge  
 HCLS1 emeapttaykKttpieaassg  
 HCLS1 kakfesmaeeKrkreeeeekaq  
 HCLS1 kfesmaeekrKreeeeekaqqv  
 HCLS1 eekrkreeeeKaqqvarrqe  
 GMNN qkqeeikeniKnssvprrtlk  
 RANBP3 --madlaneekpaiappvfvf  
 RANBP3 appvfvfqkdkgqkspaeqkn  
 RANBP3 vfvfqkdkgqkspaeqknlsd  
 RANBP3 aiappvfvfqKdkgqkspaeq  
 RANBP3 vfvfqkdkgqkspaeqknlsd  
 RANBP3 dkgqkspaeqKnlsdsgeep  
 USF1 seaprttrdeKrraqhnever  
 NUP50 fasakaaadpKvafgslaang  
 NUP50 atsasfnfgkKvdssvlgsls  
 NUP50 atsasfnfgkKvdssvlgsls  
 HSP90B1 kegvkfdeseKtkesreavek  
 HSP90B1 ktkesreaveKefepInwmk  
 HNRNPCL1 ---masnvtnKmdphsmnsrv  
 HNRNPL seggrapkrIKtdnagdqhgg  
 CTCF veesetfikgKerktyqrrre  
 CTCF aiveesetfiKgkerkyqrr  
 PRKCQ mchlpepelnKerpslqiklk  
 ZRANB2 rekteakmmKaggteigktl  
 DCTN1 qleqvqewksKmqqeqadlqr  
 CTTN envfqehqtlKেকেletgpka  
 CTTN kfgveqdrmdKsavghyqsk  
 CTTN ksavgfdyqgKtekhesqrdy  
 CTTN ksavgfdyqgKtekhesqrdy  
 CTTN ksavgfeyqgKtekhesqkdy  
 CTTN ksavgfeyqgKtekhesqkdy  
 CTTN ksavgfeyqgKtekhesqkdy  
 TRIM25 eqlqqeytemKalldasets  
 TRIM25 ldasettstrKikeeekrvns  
 EXOSC9 apidtsdveeKaeeiiaeaep  
 SF3A3 yedssgnvvnKktyedlkrqg  
 SF3A3 edssgnvvnKkyedlkrqgl  
 NFIC stsssgskrhKsgsmeedvdt  
 CCNT1 mrikvhaaadKhnsvedsvtk  
 CCNT1 khnsvedsvtKsrehkekhkt  
 CCDC55 makdkernqeKpsnsesslga  
 CCDC55 psnsesslgaKhrleegqek  
 CCDC55 rteegqekgKeqerppeavs  
 TRAP1 stesvqgstsKhefqaetkkl  
 USP8 dsgsgkpfkiKgqpesgilrt  
 DNMT1 itshfakgpaKrkpquesera  
 POM121C mfkpiftappKsekegptppg  
 POM121C piftappkseKegptppgpsv



Table S5

POM121C mfkpiftappKsekegptppg  
 ETV3 prikvepaseKdpeslrqsar  
 SNAP29 fgglvnyfksKpvetppeqng  
 SNCB akegvvaaaeKtkqgvteaae  
 SNCB egvvaaaektKqgvteaaekt  
 SNCB akegvvaaaeKtkqgvteaae  
 SNCB egvvaaaektKqgvteaaekt  
 MYC eklasyqaarKdsgspnparg  
 VSX2 gkagealskpKsetvakstsg  
 KIAA1429 qpqpslkrnpKhadgededqf  
 PPP1R9B dyqqkeieflKketaqrrvle  
 PPP1R9B yqqkeieflKketaqrrvle  
 SPEN taagggpqqgKkgnepkvdat  
 SPEN pqgkkgknepKvdatrpeatt  
 SPEN pqgkkgknepKvdatrpeatt  
 SPEN taagggpqqgKkgnepkvdat  
 SPEN pqgkkgknepKvdatrpeatt  
 EFHD2 eerkkqaeemKqrkaafkelq  
 EVI5L tlgalremqdKvldmekrnss  
 WDR67 kqdltgdfesKknelpdglnk  
 WDR67 qdltgdfeskKnelpdglnk  
 WDR67 qdltgdfeskKnelpdglnk  
 DYNLL2 -----msdrKaviknadmse  
 TRRAP raafamvthvKqepreense  
 BAT2L2 sqipaqpsvaKvpygkgsfn  
 ZCCHC17 kdcfmqpggtKyslipdeeee  
 CAND1 atndlmtelqKdsikldddse  
 TPX2 dfhfrtderiKqhpknqeeyk  
 TPX2 kqhpknqeeyKevnftselrk  
 COBRA1 vapsklealqKaleptgqsge  
 PPP4R2 daveaeghevKrlrfdkegev  
 THRAP3 tfsggtsqdtKasesskpwpd  
 THRAP3 sqdtkasessKpwpdatygtg  
 THRAP3 gkmksdsfapKtdsekpfrgs  
 THRAP3 dfekkmadfhKeemddqdkdk  
 THRAP3 kryklrddfeKkmadfhkeem  
 THRAP3 ryklrddfekKmadfhkeem  
 THRAP3 dfekkmadfhKeemddqdkdk  
 THRAP3 efddepkfmsKviganknqee  
 THRAP3 kfmskviganKnqeeeksgkw  
 THRAP3 pekfrvtayKavqekssspp  
 THRAP3 ereesttgfdKsrlgtkdfvg  
 LUC7L3 qqieelgsegKveeaqgmmkl  
 LUC7L3 akikatveelKeklrkrteep  
 SR140 qeelkkkedeKaaaiyeefl  
 SR140 vpldatedskKnepifkvaps  
 DOK3 tgrpdpqagfKaklvllsre  
 TCF20 ipskrqsqdvKnsstedkgrl  
 CEP250 qrlveqevqeKlretqeynri  
 RNF40 agdggsgppeKklsreekttt  
 ZNF292 annlntpnngKfvyflpspv  
 IFT81 ksmrqaadaKpeslmkrlee

Table S5

|          |                       |
|----------|-----------------------|
| FTSJD2   | eglgkysqgrKdiveassqkg |
| DBF4B    | rvetsamvdpKgshprsrkp  |
| DAXX     | eeaaagkdgdKspmslqisn  |
| HNRNPM   | hvkmderalpKgdffpperpq |
| UACA     | aevgklrnqiKqnemiveefk |
| SPAG17   | fkdqrrreneKkviedkpkle |
| CCDC109B | qqhfdvqqynKlkedlakake |
| CCDC109B | hfdvqqynkIKedlakakesl |
| TUBA3D   | iqpdgqmpsdKtiggddsfm  |
| C11orf9  | nnnngmgaapKpfpgggtpi  |
| C11orf9  | pfpggtgppiKaepkapyapg |
| TMSL3    | -----msdKpdmaeiekfd   |
| TMSL3    | pklkktetqeKnplpsketie |
| TMSL3    | -----msdKpdmaeiekfd   |
| TMSL3    | etqeknplpsKetieseqqag |
| TMSL3    | lpsketieqeKqages----- |
| TUBA1A   | iqpdgqmpsdKtiggddsfm  |
| KIAA1967 | hpsriqvsseKeaapdagaep |
| TPM3     | kkkmqmlkldKenaldraeqa |
| TPM3     | aqerlatalqKleaaekaade |
| CIITA    | mpaevgqksqKrpfeelpad  |
| CIITA    | pfpeelpadlKhwkpaepptv |
| CIITA    | smempaevgqKsqkrpfeel  |
| APEX1    | ----mpkrqgKgavaedgd   |
| APEX1    | ----mpkrqgKgavaedgd   |
| HNRNPA1  | hncevrkalsKqemasasssq |
| SMARCC2  | kgpstpytkKrgthreeeqed |
| YWHAB    | kqqmgkeyreKieaelqdicn |
| YWHAB    | kqqmgkeyreKieaelqdicn |
| SPTB     | iedrhrkneKaqaesvllrd  |
| SPTB     | iedrhrkneKaqaesvllrd  |
| TPM4     | aqerlatalqKleaaekaade |
| TPM4     | eiqemqlkeaKhiaeeadrky |
| TPM4     | lkcgdleeelKnvtnnlksle |
| TPM4     | nlksleaaseKysekedkyee |
| TPM4     | leaasekyseKedkyeeeiKl |
| TPM4     | leaasekyseKedkyeeeiKl |
| TPM4     | asekysekedKyeeeiKlIsd |
| TPM4     | ekedkyeeeiKlIsdklkeae |
| ARFGAP1  | lghslnenvlKpaqekvkegk |
| ARNTL    | ppdasspggkKilnggtpdip |
| HDAC5    | mqqqhqqfleKqkqqqlqgk  |
| HDAC5    | qqhqqfleqKqqqlqgkil   |
| HDAC5    | qqqlqgkiltKtgelprqptt |
| LMNB1    | lreyeaalnsKdaalatalgd |
| LMNB1    | lreyeaalnsKdaalatalgd |
| LMNB1    | lreyeaalnsKdaalatalgd |
| LMNB1    | daalatalgdKkslegdledl |
| LMNB1    | lreyeaalnsKdaalatalgd |
| LMNB1    | daalatalgdKkslegdledl |
| LMNB1    | lreyeaalnsKdaalatalgd |
| TUBA1C   | iqpdgqmpsdKtiggddsfm  |

Table S5

|          |                        |
|----------|------------------------|
| SON      | vvtmsveyqmKsvlksvests  |
| SON      | svestspepsKimIveppvak  |
| PAFAH1B1 | eftsggplgqKrdpkewiprp  |
| MLL4     | grsppapppyKaprlidedgea |
| FKBP4    | keswemnseeKleqstivker  |
| HMGB2    | ffvqtcreehKkkhpdssvnf  |
| HMGB2    | fvqtcreehkKkkhpdssvnfa |
| HMGB2    | erwktmsakeKskfedmaksd  |
| HMGB2    | skfedmaksdKarydremkny  |
| HMGB2    | lfcsehrpkiKsehpglsig   |
| HMGB2    | emwseqsakdKqpyeqkaakl  |
| HMGB2    | lfcsehrpkiKsehpglsig   |
| EXO1     | rnkfatflqrKneesgavvvp  |
| MSN      | akerqeaaaaKeallqasrdq  |
| TLE3     | ttpglrsmpgKppgmdpigim  |
| SMC3     | rqlllekieeKqkelaetepk  |
| SMC3     | kllekieekqKelaetepkfn  |
| DMAP1    | egdaasgtisKkdiinpdkkk  |
| DMAP1    | egdaasgtisKkdiinpdkkk  |
| DMAP1    | gdaasgtisKkdiinpdkkks  |
| DMAP1    | egdaasgtisKkdiinpdkkk  |
| DMAP1    | gdaasgtisKkdiinpdkkks  |
| DMAP1    | egdaasgtisKkdiinpdkkk  |
| DMAP1    | gdaasgtisKkdiinpdkkks  |
| HMG4     | nrdastlqsqKaegtgdak--  |
| TMSB10   | -----madKpdmgeiasfd    |
| TMSB10   | aklkketqetKntlptketie  |
| TMSB10   | lptketieqetKrses-----  |
| TMSB4X   | -----msdKpdmaeiekfd    |
| TMSB4X   | etqeknplpsKetieqekqag  |
| TMSB4X   | sklkketqetKnplpsketie  |
| TMSB4X   | etqeknplpsKetieqekqag  |
| TMSB4X   | etqeknplpsKetieqekqag  |
| TMSB4X   | sklkketqetKnplpsketie  |
| TMSB4X   | etqeknplpsKetieqekqag  |
| TMSB4X   | lpsketieqetKqages----- |
| SF3B2    | remddpsvgpKipqalekilq  |
| SMARCC1  | aslygkrrsqKeedeqedltk  |
| ATF2     | anedpdekrrKflernraaas  |
| ATF2     | krkvwvqsleKkaedlsslng  |
| WAC      | ptptssvpaqKterkestsgd  |
| WAC      | ssvpaqkterKestsgdkpvs  |
| DOT1L    | apmdsgaeeeeKagaatvkkps |
| DOT1L    | apmdsgaeeeeKagaatvkkps |
| DOT1L    | apmdsgaeeeeKagaatvkkps |
| NCOR1    | rqdiltqesrKtpevvqstrp  |
| NCOR1    | egsisqgtpiKfdnnsqsai   |
| CEBPB    | ktvdksdeyKirrernniav   |
| MYCBP2   | glevkvkdppKgmippgtqlv  |
| MYCBP2   | gmippgtqlvKpksepqpnkv  |
| IGF2R    | rssnvsykysKvnkeetden   |
| SNRNP70  | rrqqevetelKmwdpndpna   |

Table S5

|        |                        |
|--------|------------------------|
| NPAT   | lsvgtavkdIKqeqtksassl  |
| E2F2   | vdglpspktKspgektrydt   |
| E2F2   | spktpkspgeKtrydtslgll  |
| E2F2   | spktpkspgeKtrydtslgll  |
| E2F2   | vdglpspktKspgektrydt   |
| RSF1   | vlpsequestkKpyriesdeee |
| PCNP   | aeaaaadlptKptkiskfgfa  |
| PCNP   | ptsagpnsfnKgkhgfsdnqk  |
| SMC1A  | reqqqiekeiKekdselnqkr  |
| SMC1A  | sqahglqmrIKysqsdleqtk  |
| CEBPA  | gapalrplviKqepreedeak  |
| NUP153 | idnkcstgyeKnmtpgqnreq  |
| NUP153 | pvtstslvfgKkadneepkcq  |
| NFKB1  | khgtmdteskKdpegcdksdd  |
| NFKB1  | mkhgtmdtesKkdpegcdksd  |
| NFKB1  | khgtmdteskKdpegcdksdd  |
| NFKB1  | eskkdpegcdKsddkntvnlf  |
| NFKB1  | mkhgtmdtesKkdpegcdksd  |
| NFKB1  | eskkdpegcdKsddkntvnlf  |
| GAPVD1 | dedhletdpnKlierfspsqq  |
| GAPVD1 | ierfspsqqeKlfgekgsdrf  |
| NUMA1  | ekelsaalqdKkcleekneil  |
| NUMA1  | alqdkkcleekneilqgklsq  |
| NUMA1  | leekneilqgKlsqleehlsq  |
| NUMA1  | tarelevmtaKyegakvkvle  |
| NUMA1  | mtakyegakvKvleerqrfqe  |
| POP1   | rgvkhhsggeKpfqaqkqeph  |
| POP1   | sggekpfqaqKqephpqtsrq  |
| RIF1   | etmiktdflpKakqregtfsk  |
| RIF1   | miktfdflpkaKqregtfsksd |
| RIF1   | egtfsksdseKivngtkrssr  |
| LACTB  | eqekegksneKndftkfkteq  |
| DHX38  | trdrdrvrgKysddtplptp   |
| DHX38  | dgkvdyrteqKfadhmrkse   |
| DHX38  | rteqkfadhmrkseassefa   |
| DHX38  | eqkfadhmrkseassefakk   |
| DHX38  | dgkvdyrteqKfadhmrkse   |
| DHX38  | rteqkfadhmrkseassefa   |
| DHX38  | eqkfadhmrkseassefakk   |
| ZMYM2  | nedkittgkrKheddepvfeq  |
| LARP7  | vkkiqkdiiKeaseaskenr   |
| PRKDC  | lksvgpdfgkKrlglpgdevd  |
| PRKDC  | plksvgpdfgkKrlglpgdev  |
| LUZP1  | neknrnqednKvkdlnqeiek  |
| LUZP1  | knrnqednkvKdlnqeieklk  |
| SYNRG  | psllmplpgtKalpsmdkyav  |
| SYNRG  | yavfkgiaadKssentvppgd  |
| SYNRG  | pltsnvgstvKggqnstaast  |
| MYH3   | dklqvkvksyKrqaeeadeqa  |
| ARCN1  | kgkevdfvdKlksegetims   |
| SNX2   | eaeakmmvanKpdkiqqakne  |
| SNX2   | eaeakmmvanKpdkiqqakne  |

Table S5

SUMO3 -----mseeKpkegvktend  
 SUMO3 ----mseekpKegvktendhi  
 SUMO3 mseekpkegvKtendhinlkv  
 SUMO2 ----madekpKegvktenndh  
 SUMO2 madekpkegvKtenndhinlk  
 ARFGAP3 gakkgsIgaqKlancfneie  
 ARFGAP3 gakkgsIgaqKlancfneie  
 THOC5 irsdgapaegKrnrsdteqeg  
 NBN ptklpsinksKdrasqqqtn  
 NBN qtqpatpslwKnkeqhsene  
 NBN iedevleqlfKdtkpeleidv  
 NBN lqddsemIpkKlllItefrslv  
 NBN klqddsemIpkKlllItefrsl  
 NBN klqddsemIpkKlllItefrsl  
 LZTFL1 ksleenlataKhdllrvqeql  
 LZTFL1 qlhmaekeleKkfqqtaayrn  
 LZTFL1 lhmaekeleKkfqqtaayrnm  
 LZTFL1 ksleenlataKhdllrvqeql  
 LZTFL1 rvqeqlhmaeKelekkfqqta  
 LZTFL1 lhmaekeleKkfqqtaayrnm  
 PSMD1 eektssafvgKtpeaspepkd  
 PSMD1 gktpeaspepKdqtkmikil  
 SAFB skadslIavvKrepaeqpgdg  
 SAFB elhgkmisveKaknepvgkkt  
 SAFB hgkmisvekaKnepvgkktSD  
 VASP eeasggptapKaesgrsgggg  
 SKP1 peeirktfniKndfteeaaq  
 RB1 dgskhIpgesKfqqklaemts  
 RB1 hIpgeskfqqKlaemtstrtr  
 PHAX epfqfgqssqKppvaggkkin  
 PHAX eldeymhggkKmgsk eeengq  
 PHAX ymhggkkmgsKeeengqghlk  
 FAM83B nrtnnppgnwKkpsdlsIvas  
 NONO -----mqsnKtfnlekqnht  
 NONO sqnegltidIKnfrkpgektf  
 ITSN1 rrqellnqrnKeqedivvlka  
 ITSN1 lefealndKkhqlegklqd  
 ITSN1 efelealndKkhqlegklqdi  
 ITSN1 rrqellnqrnKeqedivvlka  
 ITSN1 lefealndKkhqlegklqd  
 ITSN1 efelealndKkhqlegklqdi  
 ITSN1 rrqellnqrnKeqedivvlka  
 ITSN1 lefealndKkhqlegklqd  
 ITSN1 efelealndKkhqlegklqdi  
 YTHDF2 hnmdigtwdnKgpvakapsqa  
 ATAD3B qhqaraqyqdKlarqyedql  
 GNL3 eallreaelrKqrleelkqqq  
 GNL3 elrkqrleelKqqqklDrqke  
 KRT7 eidniknqraKleaaiaeeae  
 ZC3H11A trrlssastgKpplsveddfe  
 RBBP4 -----madKeaafddavee  
 BCL9L apakpmhpenKltnhgktgng

Table S5

BCL9L hpenkltnhgKtgnnggaqsqh  
 BCL9L agtpslidseaKevaprskrrc  
 DTNBP1 svqqdftsglKtIsdksreak  
 C6orf134 lppkraegdiKpysssdrefl  
 RPL6 egeifdtekeKyeiteqrkid  
 DDX46 svkggggnnekKsgptvtkvvt  
 AR arklkklgnlKlqeegasst  
 AR arklkklgnlKlqeegasst  
 AR arklkklgnlKlqeegasst  
 AR ttspteettqKltvshiegye  
 FLNA skikvsglgeKvdvvgkdqeft  
 FLNA sglgekvdvgKdqeftvkskg  
 NBAS hglekpisfvKntqssseear  
 SERF2 gperppekprKhdsgaadler  
 RBBP6 etksvdknpcKdrekhvlear  
 RBBP6 vdknpckdreKhvlearnke  
 PRPF40A ntetkqstweKpddlktpaeq  
 VAPA cvfempnendKlgitppgnap  
 EIF4H garpreevvqKeqk-----  
 EIF4H preevvqkeqK-----  
 MLL2 qsrdfaplhKpprpqpeva  
 HSP90AA1 igypitlfveKerdkevsdde  
 HSP90AA1 ekyidqeelnKtkpiwtrnpd  
 HSP90AA1 yidqeelnktKpiwtrnpddi  
 HSP90AA1 ekyidqeelnKtkpiwtrnpd  
 HSP90AA1 ekyidqeelnKtkpiwtrnpd  
 HSP90AA1 fegktlsvvtKeglelpedee  
 PAPOLA tkiptpivgvKrtssphkees  
 PAPOLA vgvkrtssphKeespkktkte  
 PAPOLA qtaasllasqKtsstdlsdip  
 PAPOLA qtaasllasqKtsstdlsdip  
 JMJD1C qkmdpnvsdsKhsianakfle  
 HN1 ---mtttttfKgvdpnsrns  
 KIAA1267 hdnstslnggKraltssalhg  
 RELA ddrhrieekrKrtyetfksim  
 RELA rtyetfksimKkspfsqptdp  
 RELA tyetfksimkKspfsqptdpr  
 RELA tyetfksimkKspfsqptdpr  
 RELA rtyetfksimKkspfsqptdp  
 ING3 httdhipekKfkseallstl  
 ING3 ttddhipekkfKseallstls  
 ING3 hhttdhipeKfkseallst  
 ING3 ttddhipekkfKseallstls  
 CACYBP ---maseelqKdleevkvllle  
 CACYBP eelqkdleevKvlllekattrkr  
 SPTY2D1 pqrllpftgyKrqreyeedd  
 BRAP etmksnpdelKttveerksse  
 PHF20L1 ysakehgmpeKnpaegntvfv  
 ZC3H14 pslppsqanKnllkaisea  
 KIF1B fnsretskesKciiqmgnst  
 MEF2A anslgkvmptKsppppggnl  
 MEF2A dlrvvipssKgmmpplsee

Table S5

|          |                       |
|----------|-----------------------|
| MEF2A    | sintnqnisiKsepisppdr  |
| TPD52L2  | nlpsagsgdKplsdpapf--  |
| DDX42    | fggfaisagkKeepklpqqsh |
| DDX42    | aisagkkeepKlpqqshsafg |
| PPHLN1   | aeaaskwaaeKleksdesnlp |
| PPHLN1   | tekelaeeasKwaaekleksd |
| NCOR1    | rqdiltqesrKtpevvqstrp |
| NCOR1    | egsisqgtpiKfdnnsqqsai |
| LSM14A   | irrdgpmkfeKdfdfesanaq |
| KIAA1143 | dgriiyrkpvKhpsdekysgl |
| SERBP1   | errfekpleeKgeggefsvdr |
| SMC4     | nkitkfiienKekftqldled |
| SMC4     | itkfiienkeKftqldledvq |
| WDHD1    | nsqtnkteevKeenlknvlse |
| WDHD1    | qkpldfstnqKlsafafkqe- |
| WAPAL    | sscnklitsdKvenfheehek |
| WAPAL    | epnqkddgvfKapappskvik |
| TOP1     | avqrleeqlmKlevqatdree |
| RANBP1   | naenaqkftKfeecrkeiee  |
| RANBP1   | eerekagsgKndhaekvaeK  |
| RANBP1   | kndhaekvaeKlealsvkeet |
| HSP90AB1 | yidqeelnktKpiwtrnpddi |
| SAPS2    | pgagappapgKkeappvegds |
| AGFG2    | -----mvmaaKkgpgpgggvs |
| AGFG2    | tpvqgsipegKplrllgdpa  |
| VIM      | aeleqlkgqgKsrlgdlyeee |
| PSMA3    | ltngrheivpKdireeaekya |
| PSMA3    | ltngrheivpKdireeaekya |
| PSMA3    | vpkdireeaekyakeslkeed |
| PSMA3    | ltngrheivpKdireeaekya |
| PSMA3    | direeaekyaKeslkeedesd |
| RPS3A    | gkatgdetgaKveradgyepp |
| PAK2     | kdplsanhslKplpsvpeekk |
| BCOR     | aarlsngkypKapeggegaqp |
| PER1     | trssqsshtsKyfgsidssea |
| BRD4     | pqplvvvkeeKihspiirsep |
| BRD4     | pqplvvvkeeKihspiirsep |
| SYNRG    | psllmplpgtKalpsmdkyav |
| SYNRG    | yavfkgiaadKssentvppgd |
| SYNRG    | pltsnvgstvKggqnstaast |
| TLE4     | ndhqrdrsiKsssvspsasf  |
| TLE4     | seskkqkteeKeiaarydsdg |
| TLE4     | ngldktrllkKdapispasia |
| FYB      | -----maKyntggnted     |
| FYB      | lhsvnqdhdIKplgpksgptp |
| ANKRD12  | dkiasysktpKiersdvskem |
| PARP1    | gqdgigskaeKtlgdfaaeya |
| PARP1    | eginksekrmKlilkgaavd  |
| CHD4     | vvveppegeeKvekaevkert |
| CHD4     | tepkgaadveKveeksaidlt |
| MORC2    | krgrfvvkeeKkdsnelsdsa |
| MORC2    | rgrfvvkeekKdsnelsdsag |

Table S5

|           |                        |
|-----------|------------------------|
| NAA11     | delrrqmdlkKgyvvlgsre   |
| CDK13     | aktkplqvtKvennlivdka   |
| GPATCH8   | kdppqgyfgpKlppslgnkp   |
| TXLNA     | tIntlstpeeKlaalckkyae  |
| TXLNA     | tIntlstpeeKlaalckkyae  |
| CSDE1     | sdhrflgtveKeatfsnpktt  |
| CSDE1     | vekeatfsnpKttspnkgkek  |
| KDM3A     | nsdspnncsgKkvepsalacr  |
| KDM3A     | salacrsqnKessvkvndes   |
| DTNBP1    | svqqdftsgIKtIsdksreak  |
| STMN1     | --massdiqvKelekrasgqa  |
| STMN1     | rrksheaevIKqlaekrehek  |
| STMN1     | eaevlkqlaeKrehekevlqk  |
| STMN1     | kqlaekreheKevlqkaieen  |
| STMN1     | kaieennfsKmaeeklthkm   |
| STMN1     | nnnfskmaeeKlthkmeanke  |
| STMN1     | skmaeeklthKmeankenrea  |
| STMN1     | maaklerlreKdkhievrkn   |
| STMN1     | maaklerlreKdkhievrkn   |
| ARCN1     | kgkevdfvdKIksegetims   |
| SMARCA2   | essqmsdlpvKvthtetgkvl  |
| SMARCA2   | gkkrpnrgkaKpvvsdfdsde  |
| RAD50     | aceirdqitsKeaqltsskei  |
| RAD50     | skimklneiKaldsrkkqme   |
| NPM1      | pkgpssvediKakmqasiek   |
| NPM1      | pkgpssvediKakmqasiek   |
| NPM1      | pkgpssvediKakmqasiek   |
| NPM1      | pkgpssvediKakmqasiek   |
| NPM1      | pkgpssvediKakmqasiek   |
| MNS1      | aakeeeenfrKtmlakfaedd  |
| RPL3      | mgplkkdriaKeega-----   |
| RPL3      | mgplkkdriaKeega-----   |
| MDC1      | iqgrgrqtvdKvmgipketae  |
| MAP7D2    | agtt dageaaKilaekrrqar |
| KRT8      | daeqrgelaiKdanaklsele  |
| KRT8      | gelaikdanaKlseleaalqr  |
| KRT8      | vvkkietrdgKlvsessdvlp  |
| LOC643790 | -----mpkrKvssaegaake   |
| LOC643790 | -----mpkrKvssaegaake   |
| NCL       | akagknqgdpKkmapppkeve  |
| NCL       | kagknqgdpKkmapppkevee  |
| NCL       | kagknqgdpKkmapppkevee  |
| NCL       | rsqpsktlfvKglstedtreet |
| NCL       | rsqpsktlfvKglstedtreet |
| HCFC1     | qetskdssgtKpankrpmssp  |
| FAM22A    | gtarldssssKfaagqgaerd  |
| EEF1D     | diarareniqKslagsgpga   |
| EEF1D     | klearlnvleKsspghratap  |
| ATAD3A    | qhqaraqyqdKlarqyedql   |
| TACC2     | yqalkvhaeeKIdranaeiaq  |
| TACC2     | eqaahqaslRKeqlrvdaler  |
| ARID1A    | spemmglgdvKltpatkmnnk  |



Table S5

ARID1A spemmglgdvKltpatkmnk  
 ARID1A ksssstttneKitklyelgge  
 ARID1A sstttnekitKlyelggeper  
 ARID1A pflhsgmkmqKagppvpashi  
 ARID1A egpppdgppeKritatmddml  
 ARID1A ksseaikessKfpgispaqs  
 TKT -----mesyhKpdqqklqalk  
 TKT mesyhpqddqKlqalkdtanr  
 HNRNPR tyrqrekqgsKvqestkqpde  
 HNRNPR qestkqpdeaKikallertgy  
 XRCC6 pdynpegkvtKrkhdnegsgs  
 XRCC6 pkveyseeelKthiskgtlgk  
 XRCC6 pkveyseeelKthiskgtlgk  
 XRCC6 vyppdynpegKvtrkhdneg  
 XRCC6 pdynpegkvtKrkhdnegsgs  
 XRCC6 rkhdnegsgsKrpveysee  
 XRCC6 pkveyseeelKthiskgtlgk  
 XRCC6 pkveyseeelKthiskgtlgk  
 XRCC6 rkhdnegsgsKrpveysee  
 XRCC6 dneqsgskrpKveyseeelkt  
 XRCC6 pkveyseeelKthiskgtlgk  
 AGAP6 kpsektreeKerwirskyee  
 SAFB elhgkmisveKaknepvgkkt  
 SAFB hgkmisvekaKnepvgkktsd  
 SETX vppvpliaqKpvgemknsn  
 SKIV2L2 klqsestnngKnkrdvdfeft  
 SKIV2L2 egtdepifgkKprieesited  
 SKIV2L2 klqsestnngKnkrdvdfeft  
 SKIV2L2 feftdepifgkKprieesite  
 SKIV2L2 egtdepifgkKprieesited  
 SKIV2L2 klqsestnngKnkrdvdfeft  
 SKIV2L2 feftdepifgkKprieesite  
 SKIV2L2 egtdepifgkKprieesited  
 CCDC75 epiplniktgKsgigheask  
 CCDC75 gigheaskrKaeeklesyrk  
 SLC4A8 kkakeeeeeaeKmlieggdkfp  
 SLC4A8 aekmlieggdKfplesrklls  
 KIAA0947 tskemnelKaseigekyrk  
 KIAA0947 kelkaseigeKyrkqpceet  
 KIAA0947 kaseigekyrKqpceetlgt  
 INTS1 nesktastllKpapslpser  
 TPR nahiklsnlyKsaaddseaks  
 TPR yksaaddseaKsneltravee  
 TPR kllkeageanKaiqdhllve  
 TPR nahiklsnlyKsaaddseaks  
 TPR yksaaddseaKsneltravee  
 TPR kllkeageanKaiqdhllve  
 TPR eveqskdqmeKemlekigrle  
 TPR enandllsatKrkqailsee  
 TPR keveakapilKrqreeyeraq  
 TPR eiqlqedtdKankqssvler  
 ING4 tdlarfeadllKekqiesdyd

Table S5

|            |                        |
|------------|------------------------|
| E2F3       | lrspsdpktpKspsektrydt  |
| E2F3       | spktpkspseKtrydtslgll  |
| E2F3       | spktpkspseKtrydtslgll  |
| E2F3       | lrspsdpktpKspsektrydt  |
| NCOA3      | aenqrgplesKghkklqllt   |
| NCOA3      | aenqrgplesKghkklqllt   |
| WWC1       | slvsgsssssKydpeilkaei  |
| CAST       | rhllddngqdKpvpkptkkse  |
| ING5       | larfeadlkdkmegsdfessg  |
| ZEB2       | tqlrnklengKplsmseqtgl  |
| ZEB2       | tnsaitqlrnKlengkplsm   |
| ZEB2       | tqlrnklengKplsmseqtgl  |
| HSPD1      | taevvteipKeekdpngam    |
| HSPD1      | vvvteipkeeKdpngamggm   |
| ZFR        | tpkinfvgnKlqstgnaed    |
| LRRFIP1    | vdtnepldmKepdeeksdqq   |
| LRRFIP1    | tyqntdlseiKeeeqvkstr   |
| LRRFIP1    | vdtnepldmKepdeeksdqq   |
| LRRFIP1    | tyqntdlseiKeeeqvkstr   |
| RPL6       | egeifdtekeKyeiteqrkid  |
| MYH10      | seqleqakrfKanleknkqgl  |
| MYH10      | krfkanleknKqgletdnkel  |
| ARPP19     | emedkvtspeKaeaklkary   |
| ARPP19     | vtspekaeeaKlkaryphlgq  |
| ARPP19     | spekaeeaklkaryphlgqk   |
| ARPP19     | spekaeeaklkaryphlgqk   |
| ARPP19     | iptpqdlpqrKpslvasklag  |
| AIMP1      | aklkeieelKqeliquaiqn   |
| POLQ       | arkrasldinKekpgasqneg  |
| BOD1L      | qtsdssegktKsvrhayvhkp  |
| BOD1L      | qghpsavcaeKeekhgkecpe  |
| BOD1L      | psavcaekeeKhgkecpeigp  |
| BOD1L      | eigpfagrgqKestlhlnae   |
| SUMO3      | -----mseeKpkegvktend   |
| SUMO3      | ----mseekpKegvktendhi  |
| SUMO3      | mseekpkegvKtendhinlkv  |
| FNBP1      | ekmdadinvtKadvekarqqa  |
| TMSB4X     | lrfssatmsdKpdmaeiekfd  |
| TMSB4X     | etqeknplpsKetieqekqag  |
| TMSB4X     | etqeknplpsKetieqekqag  |
| TMSB4X     | etqeknplpsKetieqekqag  |
| TMSB4X     | etqeknplpsKetieqekqag  |
| TMSB4X     | sklkkttetqeKnplpsketie |
| TMSB4X     | etqeknplpsKetieqekqag  |
| TMSB4X     | lpsketieqeKqages-----  |
| <HD1-EIF4E | vtpnslstsyKtvslplsspn  |
| TCOF1      | gnsmphpatgKtvanllsgks  |
| TCOF1      | anllsgksprKsaepsanttl  |
| TCOF1      | eapagtrsqvKasekilqvra  |
| TCOF1      | gkagavasqtKagkpeedses  |
| TCOF1      | qkagpvavqvKaekpmdnses  |
| TCOF1      | gggtapvlpKgtpvtqvka    |

Table S5

|         |                        |
|---------|------------------------|
| TCOF1   | gktgptvtqvKaekqedsess  |
| TMSL1   | sklkkttetqeKnplpsketie |
| TMSL1   | etqeknplpsKetieqekqag  |
| TMSL1   | lpsketieqeKqages-----  |
| PRAM1   | meshqdfrsiKakfqasqpep  |
| PRAM1   | asqpepsdlpKkppkpefgkl  |
| PRAM1   | sqpepsdlpKkppkpefgklk  |
| PRAM1   | meshqdfrsiKakfqasqpep  |
| PRAM1   | ppkpefgklkKfsqpelsehp  |
| MED1    | vdsskktsesKnavgstgvaki |
| MED1    | esesgssiaeKsyqnspsdd   |
| MED1    | esesgssiaeKsyqnspsdd   |
| CTNNBL1 | miltfekrsyKnqelrikfpd  |
| CTNNBL1 | rsyknqelriKfndnpekfme  |
| CGN     | etghwqsmfqKnkedlratkq  |
| CGN     | ghwqsmfqknKedlratkqel  |
| CGN     | qknkedlratKqellqlrmek  |
| ATRX    | glsdiaekflKkdqsdetsed  |
| ATRX    | lsdiaekflKkdqsdetsedd  |
| BAHCC1  | flvgkelgreKagkaaegker  |
| DIAPH1  | vqnfaatdeKdkfvekmstf   |
| DIAPH1  | vqnfaatdeKdkfvekmstf   |
| PHF20L1 | ysakehgmpeKnpaegntvfv  |
| PHF20L1 | rsknslqysaKehgmpeknpa  |
| PHF20L1 | ysakehgmpeKnpaegntvfv  |
| PDS5A   | vtpvknidpvKnkeinsdqat  |
| PDS5A   | pvknidpvknKeinsdqatqg  |
| CENPF   | eekmesqgimKnkeiqeleql  |
| CENPF   | mdnlkyvnqIKkeneraggkm  |
| AHNAK2  | mpsfqvsapgKsieasvdvsa  |
| LSM12   | ekhfrdvesqKilqrsqaqqp  |
| DCTN1   | qleqvqewksKmqqeqlqr    |
| POLQ    | arkrasldinKekpgasqneg  |
| MAD1L1  | leeraeqirsKshliqverek  |
| MAD1L1  | kshliqvereKmqmelshkra  |
| INTS1   | nesktastllKpapsqglpser |
| PHF15   | tksgwprqneKkpsevfrtdl  |
| PHF15   | ksgwprqnekKkpsevfrtdli |
| FAM22E  | gtarlDssssKfaagqgaerd  |
| POM121  | pssnapdpcaKetvlsalkek  |
| TPM1    | aqerlatalqKleaaekaade  |
| TPM1    | kaadesergmKviesraqkde  |
| MLL3    | dvsyqggksiKlissetessfs |
| MLL3    | iaagtsdhftKpspradvfqr  |
| MLL3    | vepkkkeqenKtlvlsdkhsp  |
| MLL3    | lvlsdkhspqKkstvtnevkt  |
| MLL3    | qenktvlsdKhspqkktvt    |
| MLL3    | qkkstvtnevKtevlspnsv   |
| MLL3    | qkkstvtnevKtevlspnsv   |
| MLL3    | vktevlspnsvKveskctekn  |
| MLL3    | vdklsmetpaKteeiklekae  |
| MLL3    | metpakteeiKlekaetescp  |

Table S5

|         |                        |
|---------|------------------------|
| BUB1B   | adeastaelsKptvqpwiapp  |
| RSBN1L  | atvsekepgfKlqlssrdppg  |
| ZYX     | ppasspapapKfspvtpkftp  |
| ZYX     | vtpkftpvasKfsgapggsg   |
| TUBA1B  | iqpdgqmpsdKtigggddsfm  |
| TUT1    | cekmaqfdakKfaetqpkkdt  |
| RUNX1   | tppstalspgKmsealplgap  |
| RUNX1   | apdagaalagKlrsgdrsmve  |
| RUNX1   | apdagaalagKlrsgdrsmve  |
| COG6    | kttklqsesqKleiraqvada  |
| MAD1L1  | leeraeqirsKshliqverek  |
| MAD1L1  | kshliqvereKmqmelshkra  |
| SNRNP40 | ---mieqqkrKgpelplvpvk  |
| USO1    | qlnsqsvaitKlqtekqellq  |
| USO1    | sveitklqteKqellqkteaf  |
| USO1    | lqtekqellqKteafaksvev  |
| USO1    | ellqkteafaKsvevqgetet  |
| TEF     | lsgsfplvlkKlmenpprear  |
| TKT     | -----mesyhKpdqqklqalk  |
| TKT     | mesyhpqpdqqKlqalkdtanr |
