# Supplementary material for: Bioinformatic Analysis and Post-Translational Modification Crosstalk Prediction of Lysine Acetylation
Source: PLoS One. 2011 Dec 2;6(12):e28228. doi: 10.1371/journal.pone.0028228 (PMC3229533; doi:10.1371/journal.pone.0028228)
Supplement: Table S3 — Phosphorylation sites affected. NetPhosK 1.0 was employed to predict kinase-specific phosphorylation for nearby sites, using the default program settings. The sites where the phosphorylation binding site or the kinase binding were affected by the change from K to Q or L were tallied. (PDF) [file pone.0028228.s006.pdf]

Table S3

| IPI         | KacPos | PhosphoPos | Kac->L                                                      | Kac->Q                                      | KnownPhosph                  | GeneID | Symbol   | Seq                     |
|-------------|--------|------------|-------------------------------------------------------------|---------------------------------------------|------------------------------|--------|----------|-------------------------|
| IPI00000057 | 3      | 4          | PKA->CKI+PKA                                                |                                             |                              | 22796  | COG2     | -----mekSrmnlpgpdt      |
| IPI00000104 | 395    | 390        | unsp+GSK3->unsp+GSK3+p38MAPK                                | unsp+GSK3->unsp+GSK3+p38MAPK                |                              | 8732   | RNGTT    | rlqciereiSprhekmtgl     |
| IPI00000104 | 397    | 390        | unsp+GSK3->unsp+GSK3+p38MAPK                                | unsp+GSK3->unsp+GSK3+p38MAPK                |                              | 8732   | RNGTT    | rlqciereiSprhekmtgl     |
| IPI00000352 | 57     | 57         | PKC->                                                       | PKC->                                       |                              | 9149   | DYRK1B   | lkrksvdlkTykkyevvfy     |
| IPI00000425 | 279    | 275        | PKC+cdc2->                                                  |                                             |                              | 23545  | ATP6V0A2 | glntrigdyTvlhktdyrl     |
| IPI00000425 | 279    | 280        | ->CKII                                                      | ->CKII                                      |                              | 23545  | ATP6V0A2 | igdltyvlhkTedyrlrvcl    |
| IPI00000425 | 279    | 283        | unsp->                                                      | unsp->                                      |                              | 23545  | ATP6V0A2 | lytlvhlktdYlrqvlckaae   |
| IPI00000494 | 48     | 46         | unsp->                                                      | unsp->                                      |                              | 6125   | RPL5     | lvigdknkyntPkymrvtrvt   |
| IPI00000494 | 48     | 49         | unsp->                                                      | unsp->                                      | PhosphoSite                  | 6125   | RPL5     | qdknkynptkYrmvtrvtrnd   |
| IPI00000494 | 221    | 219        | INSR+SRC+unsp+EGFR->INSR+SRC+unsp                           |                                             |                              | 6125   | RPL5     | rylmeedeadaYkqkfsqyikn  |
| IPI00000494 | 221    | 224        | DNAPK->ATM+DNAPK                                            |                                             |                              | 6125   | RPL5     | ededadykqfSqyiknsvtpd   |
| IPI00000643 | 111    | 109        | unsp+PKC+cdc2->cdc2                                         | unsp+PKC+cdc2->cdc2                         |                              | 9532   | BAG2     | etirmpqqgeSikhatriide   |
| IPI00000684 | 180    | 179        | unsp->                                                      | unsp->                                      |                              | 6675   | UAP1     | rtnesikefTTknygyfjkkce  |
| IPI00000690 | 295    | 292        | unsp->                                                      | unsp->                                      |                              | 9131   | AIFM1    | tlfriqgdfdrSlekisrevks  |
| IPI00000690 | 295    | 297        | unsp->                                                      | unsp->                                      |                              | 9131   | AIFM1    | igdfsrlekisSrevksitig   |
| IPI00000712 | 438    | 439        | unsp+cdk5->unsp+cdk5+p38MAPK                                |                                             |                              | 4780   | NFE2L2   | elvpvsgphrktTpttkdkhssr |
| IPI00000712 | 443    | 442        |                                                             | PKC->PKC+DNAPK                              |                              | 4780   | NFE2L2   | vsgphrktptTtkdkhssrlea  |
| IPI00000712 | 443    | 447        |                                                             | unsp+CKII->unsp                             |                              | 4780   | NFE2L2   | rktpttkdkhSsrleahltrd   |
| IPI00000712 | 445    | 439        |                                                             | unsp+cdk5->unsp+GSK3+cdk5                   |                              | 4780   | NFE2L2   | elvpvsgphrktTpttkdkhssr |
| IPI00000712 | 487    | 486        | unsp+CKII->CKII                                             | unsp+CKII->ATM+unsp+CKII+DNAPK              |                              | 4780   | NFE2L2   | lpvdfnmmnSkEqfneaqla    |
| IPI00000712 | 554    | 549        | ->PKA                                                       |                                             |                              | 4780   | NFE2L2   | likegendckShllhkqdst    |
| IPI00000712 | 554    | 558        |                                                             | PKA->                                       | PhosphoSite                  | 4780   | NFE2L2   | ksllhklqslStylevfmrl    |
| IPI00000712 | 554    | 559        | PKC+cdc2+PKA->cdc2                                          | PKC+cdc2+PKA->cdc2+PKA                      | PhosphoSite                  | 4780   | NFE2L2   | shllhklqslStylevfmrl    |
| IPI00000712 | 555    | 558        | PKA->                                                       | PKA->                                       | PhosphoSite                  | 4780   | NFE2L2   | ksllhklqslStylevfmrl    |
| IPI00000712 | 555    | 559        | PKC+cdc2+PKA->cdc2+PKA                                      | PKC+cdc2+PKA->PKC+cdc2                      | PhosphoSite                  | 4780   | NFE2L2   | shllhklqslStylevfmrl    |
| IPI00000784 | 116    | 117        | unsp->SRC+unsp                                              |                                             |                              | 4209   | MEF2D    | leqspiledkYraseeldgl    |
| IPI00000787 | 53     | 55         | ->cdk5+p38MAPK                                              | ->cdk5                                      |                              | 5698   | PSMB9    | avnmrvfdkISplherical    |
| IPI00000787 | 109    | 107        | unsp+PKC+PKA->PKA                                           | unsp+PKC+PKA->PKA                           |                              | 5698   | PSMB9    | laaanvrmISykyrdlsah     |
| IPI00000792 | 23     | 26         | PKA->                                                       | PKA->                                       |                              | 1429   | CRY2     | fggpevklrSdiavipkph     |
| IPI00000816 | 50     | 46         | PKC->                                                       |                                             |                              | 7531   | YWHA     | eltveernlISayknvlgar    |
| IPI00000816 | 69     | 65         | PKC+CKII->CKII                                              | PKC+CKII->CKII                              |                              | 7531   | YWHA     | arrasvriISieqleenkqg    |
| IPI00000816 | 118    | 114        |                                                             | unsp->                                      |                              | 7531   | YWHA     | ldkhlpaanTgeskvfyymk    |
| IPI00000816 | 118    | 117        |                                                             | ->DNAPK                                     |                              | 7531   | YWHA     | hlipaantgeSkvfyymkgy    |
| IPI00000816 | 118    | 121        | unsp->                                                      | unsp->                                      |                              | 7531   | YWHA     | aantgeskvfyymkgydhyr    |
| IPI00000816 | 123    | 121        |                                                             |                                             |                              | 7531   | YWHA     | aantgeskvfyymkgydhyr    |
| IPI00000874 | 7      | 2          | CKI->                                                       | CKI->                                       |                              | 5052   | PRDX1    | -----mSsgnakighpa       |
| IPI00000874 | 7      | 3          | PKC->                                                       | PKC->                                       |                              | 5052   | PRDX1    | -----msGnakighpap       |
| IPI00000874 | 16     | 18         | PKG->                                                       | PKG->                                       |                              | 5052   | PRDX1    | ighpanpkaIavmpdgqfkd    |
| IPI00000874 | 27     | 32         | unsp+PKC+CKII->unsp+cdc2                                    | unsp+PKC+CKII->unsp+cdc2+CKII               |                              | 5052   | PRDX1    | pdgqfkdslSdykgyvvyff    |
| IPI00000874 | 35     | 32         | unsp+PKC+CKII->unsp+CKII                                    | unsp+PKC+CKII->unsp+CKII                    |                              | 5052   | PRDX1    | pdgqfkdslSdykgyvvyff    |
| IPI00000874 | 35     | 34         | unsp->                                                      | unsp+PKC+CKII->unsp+CKII                    |                              | 5052   | PRDX1    | gqfkdslsdYkgyvvyff      |
| IPI00000874 | 35     | 38         | unsp->                                                      |                                             |                              | 5052   | PRDX1    | disladykgYvvyffylpdlf   |
| IPI00000874 | 37     | 32         | unsp+PKC+CKII->unsp                                         | unsp+PKC+CKII->unsp+CKII                    |                              | 5052   | PRDX1    | pdgqfkdslSdykgyvvyff    |
| IPI00000874 | 37     | 34         |                                                             | unsp->                                      |                              | 5052   | PRDX1    | gqfkdslsdYkgyvvyff      |
| IPI00000874 | 197    | 196        |                                                             | ->ATM+DNAPK                                 |                              | 5052   | PRDX1    | pdvqkskeyfSqak-----     |
| IPI00000948 | 314    | 312        | SRC+unsp->SRC                                               |                                             |                              | 26608  | TBL2     | twklwdtdveYkklqdpylk    |
| IPI00000948 | 315    | 312        |                                                             | SRC+unsp->EGFR                              |                              | 26608  | TBL2     | twklwdtdveYkklqdpylk    |
| IPI00000948 | 315    | 319        | unsp->                                                      |                                             |                              | 26608  | TBL2     | dveykykkgdpYllktrfrea   |
| IPI00001091 | 543    | 539        | PKC->                                                       | PKC->unsp                                   |                              | 10939  | AFG3L2   | alisanrlISnqkhtfeqai    |
| IPI00001146 | 59     | 60         | INSR->                                                      |                                             |                              | 11157  | LSM6     | eyvngqlknYgdafirgnnv    |
| IPI00001364 | 278    | 281        | unsp+PKC+DNAPK->ATM+unsp+DNAPK                              |                                             |                              | 94104  | C21orf66 | rrivfsvkeSqrqkaeeig     |
| IPI00001364 | 280    | 281        | unsp+PKC+DNAPK->ATM+unsp+PKC+DNAPK                          |                                             |                              | 94104  | C21orf66 | rrivfsvkeSqrqkaeeig     |
| IPI00001432 | 299    | 297        | unsp+PKC+PKA->unsp+cdc2+PKA                                 | unsp+PKC+PKA->unsp+PKA                      |                              | 56133  | PCDH82   | sedirktfrISaksqellrq    |
| IPI00001453 | 290    | 289        |                                                             | ->ATM                                       |                              | 9118   | INA      | nlqsaeewykSkfanlnaqaa   |
| IPI00001539 | 25     | 30         | CKII->                                                      |                                             |                              | 10449  | ACAA2    | ygglkfdtaTdIsefaakaa    |
| IPI00001539 | 25     | 33         | unsp->unsp+cdc2                                             |                                             |                              | 10449  | ACAA2    | ldkftatdISefaakaaisa    |
| IPI00001539 | 81     | 82         | unsp+cdk5+p38MAPK->unsp+GSK3+cdk5+p38MAPK                   | unsp+cdk5+p38MAPK->unsp+GSK3+cdk5+p38MAPK   |                              | 10449  | ACAA2    | vglyvpjkeTpaalmtc       |
| IPI00001539 | 137    | 136        | unsp->unsp+PKA                                              |                                             |                              | 10449  | ACAA2    | pycvmrvrtYtlgslskled    |
| IPI00001539 | 137    | 140        | unsp+cdc2+CKII->cdc2+CKII                                   | unsp+cdc2+CKII->cdc2+CKII                   |                              | 10449  | ACAA2    | nmrvgtklgSDkiledslwv    |
| IPI00001539 | 270    | 274        | p38MAPK->                                                   |                                             |                              | 10449  | ACAA2    | sedavkhnhTplarivgyf     |
| IPI00001600 | 203    | 206        | PKC->                                                       |                                             | PhosphoSite                  | 79447  | C16orf53 | kreardkvlISdmkrhklee    |
| IPI00001600 | 209    | 206        | PKC->                                                       | PKC->                                       | PhosphoSite                  | 79447  | C16orf53 | kreardkvlISdmkrhklee    |
| IPI00001639 | 211    | 213        | ->PKC                                                       |                                             |                              | 3837   | KPNB1    | eftkanfdeSerhfmimqvc    |
| IPI00001639 | 867    | 863        | PKC->                                                       |                                             |                              | 3837   | KPNB1    | sktnkaatiaIwtatkelrlik  |
| IPI00001639 | 867    | 866        | ->DNAPK                                                     | ->DNAPK                                     |                              | 3837   | KPNB1    | nkaktatvatTeikrlnkna    |
| IPI00001735 | 1218   | 1215       | cdc2->PKA+cdc2                                              | cdc2->PKA+cdc2                              |                              | 9612   | NCOR2    | gtalvgpggsITkipstrv     |
| IPI00001735 | 1218   | 1217       | cdc2->CKI+cdc2                                              | cdc2->ATM+cdc2                              |                              | 9612   | NCOR2    | alvgpggsITkipstrv       |
| IPI00001735 | 1795   | 1786       | unsp+CKI+GSK3+cdk5+p38MAPK->unsp+CKI+GSK3+cdk5+cdc2+p38MAPK | unsp+CKI+GSK3+cdk5+cdc2+p38MAPK             | Uniprot                      | 9612   | NCOR2    | fsrshsspsISpggpthtkp    |
| IPI00001735 | 1795   | 1794       | PKC+cdc2->cdc2                                              | PKC+cdc2->cdc2                              |                              | 9612   | NCOR2    | plspgpthITkpttssser     |
| IPI00001735 | 1795   | 1797       |                                                             | PKC->                                       |                              | 9612   | NCOR2    | pggpthtkpTtsssererd     |
| IPI00001735 | 1797   | 1795       |                                                             |                                             | PhosphoSite                  | 9612   | NCOR2    | haflakpparSglepasspsk   |
| IPI00001735 | 2037   | 2034       | unsp+PKG+cdc2->unsp+cdc2                                    | unsp+PKG+RSK+DNAPK->unsp+PKG+DNAPK          |                              | 9612   | NCOR2    | asasdphekTqskpfsiel     |
| IPI00001735 | 2037   | 2036       | unsp+PKG+RSK->DNAPK                                         | unsp+PKG+RSK+DNAPK->unsp+PKG+DNAPK          |                              | 9612   | NCOR2    | asdphekTqskpfsiel       |
| IPI00001960 | 130    | 128        | EGFR->                                                      | EGFR->unsp+EGFR                             |                              | 25932  | CLIC4    | asdphekTqskpfsiel       |
| IPI00001960 | 130    | 132        | PKC+CKII->CKII                                              | PKC+CKII->CKII                              |                              | 25932  | CLIC4    | fakfsykyISpseanalar     |
| IPI00002144 | 321    | 320        | CKII->                                                      | CKII->CKII+DNAPK                            |                              | 57574  | 4-Mar    | qqwvlnvnydTklldqkag     |
| IPI00002255 | 2117   | 2125       | ->INSR                                                      | ->INSR                                      |                              | 987    | LRBA     | fkiddpkilaYteghgkwif    |
| IPI00002270 | 40     | 41         |                                                             | unsp+RSK->RSK                               |                              | 79624  | C6orf211 | lkvidthrhkSeffekhegee   |
| IPI00002270 | 73     | 71         | unsp+PKC->CKII                                              | unsp+PKC->                                  |                              | 79624  | C6orf211 | lslklnelqTdkfpilvek     |
| IPI00002324 | 299    | 298        |                                                             | unsp->ATM+unsp+DNAPK                        |                              | 27430  | MAT2B    | qprmaqlcdSkletigigar    |
| IPI00002349 | 140    | 138        | unsp+PKC->PKC                                               | unsp+PKC->PKC                               |                              | 57532  | NUFIP2   | qqvvdtsikqTvkanftgkag   |
| IPI00002372 | 260    | 261        | unsp->SRC+unsp                                              | unsp->SRC+unsp                              |                              | 5825   | ABCD3    | igkmttedqYegeyvnyvnr    |
| IPI00002424 | 44     | 43         | PKC->                                                       | PKC->                                       |                              | 79663  | PLEKHF2  | grvlygvyITklrckpkar     |
| IPI00002460 | 233    | 229        | unsp->                                                      | unsp->                                      |                              | 310    | ANXA7    | qrqikaafkTsygdikldkl    |
| IPI00002460 | 233    | 230        | PKC->                                                       | PKC->                                       |                              | 310    | ANXA7    | qrqikaafkTsygdikldkl    |
| IPI00002460 | 233    | 231        | INSR+unsp->INSR                                             |                                             |                              | 310    | ANXA7    | qrqikaafkTsygdikldkl    |
| IPI00002519 | 271    | 275        | unsp+PKC->PKC                                               |                                             |                              | 6470   | SHMT1    | gmfiyrkygkVsdvpktgkile  |
| IPI00002520 | 103    | 100        |                                                             | unsp->INSR                                  |                              | 6472   | SHMT2    | scinnkysegYpgkryyggae   |
| IPI00002520 | 181    | 178        | ->CKII                                                      |                                             |                              | 6472   | SHMT2    | dgghlthgymSdvkrisatsi   |
| IPI00002520 | 181    | 184        | unsp+PKA->unsp+PKG+PKA                                      |                                             |                              | 6472   | SHMT2    | hymvmdvknISatsifesp     |
| IPI00002520 | 269    | 266        | unsp+cdk5+p38MAPK->p38MAPK                                  | unsp+cdk5+p38MAPK->unsp+p38MAPK             |                              | 6472   | SHMT2    | sglvaaikvpISpfkhadivtt  |
| IPI00002520 | 464    | 464        |                                                             | ->unsp                                      |                              | 6472   | SHMT2    | vgynlejevISktdkldfks    |
| IPI00002520 | 474    | 478        |                                                             | ->cdc2                                      |                              | 6472   | SHMT2    | fkstllkdsTsgarlanlrq    |
| IPI00002520 | 474    | 479        | unsp+DNAPK->DNAPK                                           | unsp+DNAPK->DNAPK                           |                              | 6472   | SHMT2    | ksfllkdsTsgarlanlrq     |
| IPI00002521 | 94     | 92         | PKC->                                                       | PKC->                                       |                              | 522    | ATP5J    | fgnadmntfpTfkfedpkfev   |
| IPI00002525 | 136    | 133        |                                                             | ->INSR                                      |                              | 29937  | NENF     | ealdeftkvYkakypivgyt    |
| IPI00002564 | 256    | 257        | unsp+GSK3+cdk5+p38MAPK->unsp+GSK3+p38MAPK                   | unsp+GSK3+cdk5+p38MAPK->unsp+cdk5+p38MAPK   | Uniprot PhosphoSite          | 7515   | XRC1     | klidinqeekITskypaqilsp  |
| IPI00002564 | 256    | 259        | PKC+cdc2+PKA->PKC+cdc2                                      | PKC+cdc2+PKA->PKC+cdc2                      | Uniprot PhosphoSite          | 7515   | XRC1     | klidinqeekITskypaqilsp  |
| IPI00002564 | 260    | 257        | unsp+GSK3+cdk5+p38MAPK->unsp+GSK3+p38MAPK                   | unsp+GSK3+cdk5+p38MAPK->unsp+GSK3+p38MAPK   | Uniprot PhosphoSite          | 7515   | XRC1     | klidinqeekITskypaqilsp  |
| IPI00002564 | 260    | 259        | PKC+cdc2+PKA->cdc2+PKA+DNAPK                                | PKC+cdc2+PKA->cdc2+DNAPK                    | Uniprot PhosphoSite          | 7515   | XRC1     | klidinqeekITskypaqilsp  |
| IPI00002564 | 260    | 266        | unsp+GSK3+cdk5+cdc2+p38MAPK->unsp+cdk5+cdc2+p38             | unsp+GSK3+cdk5+cdc2+p38MAPK->unsp+cdk5+cdc2 | Uniprot PhosphoSite          | 7515   | XRC1     | klidinqeekITskypaqilsp  |
| IPI00002564 | 271    | 266        | unsp+GSK3+cdk5+cdc2+p38MAPK->unsp+cdk5+cdc2+p38             | unsp+GSK3+cdk5+cdc2+p38MAPK->unsp+cdk5+cdc2 | Uniprot PhosphoSite          | 7515   | XRC1     | klidinqeekITskypaqilsp  |
| IPI00002852 | 84     | 79         | PKC->                                                       |                                             |                              | 5828   | PEX2     | iyksnatvgqSvlnikyndf    |
| IPI00002852 | 84     | 90         | cdk5->                                                      | cdk5->                                      |                              | 5828   | PEX2     | vinikyndfISpnlyrappsk   |
| IPI00002852 | 86     | 90         |                                                             | cdk5->cdk5+p38MAPK                          |                              | 5828   | PEX2     | vinikyndfISpnlyrappsk   |
| IPI00002922 | 254    | 253        | unsp+cdc2->unsp+PKA+cdc2                                    | unsp+cdc2->unsp+cdc2+DNAPK                  |                              | 79718  | TBL1XR1  | gsydgfarinwTkdngnastlg  |
| IPI00002966 | 272    | 267        | ATM+unsp+DNAPK->ATM+unsp+PKA+DNAPK                          |                                             |                              | 3308   | HSPA4    | kskiallrISqeeckklkkm    |
| IPI00002966 | 430    | 421        | ->cdc2                                                      |                                             |                              | 3308   | HSPA4    | eesgdccevtISknhaafskv   |
| IPI00002966 | 430    | 429        |                                                             | ->ATM+DNAPK                                 |                              | 3308   | HSPA4    | vfsknhaafISkvltfyrkps   |
| IPI00002993 | 5      | 3          | PKC->                                                       | PKC->                                       |                              | 6880   | TAF9     | -----meSgktaspksmp      |
| IPI00002993 | 5      | 6          | ->PKC                                                       | ->unsp+PKC                                  |                              | 6880   | TAF9     | -----mesgkTaspksmpkda   |
| IPI00003168 | 188    | 189        |                                                             | unsp+GSK3+cdk5+p38MAPK->unsp+cdk5+p38MAPK   |                              | 5636   | PRPSAP2  | dymavivakSpasakraqsf    |
| IPI00003168 | 194    | 198        | unsp+PKC+PKG+PKA+RSK->unsp+PKG                              | unsp+PKC+PKG+PKA+RSK->unsp+PKC+PKG+RSK      |                              | 5636   | PRPSAP2  | kspasakraqSfaerilgia    |
| IPI00003362 | 586    | 588        | unsp+CKII->unsp+CKI+CKII                                    | unsp+CKII->unsp+CKI+CKII                    |                              | 3309   | HSPA5    | gdkeklggkISsedketmeka   |
| IPI00003362 | 586    | 589        | PKC+CKII->CKII                                              |                                             |                              | 3309   | HSPA5    | dkeklggkISsedketmekav   |
| IPI00003377 | 24     | 20         | PKC->                                                       | PKC->                                       |                              | 6432   | SFRS7    | etkvvynvgITgagqelera    |
| IPI00003377 | 24     | 32         | unsp->unsp+cdc2                                             |                                             |                              | 6432   | SFRS7    | agkgeleraISyvgpfrtwti   |
| IPI00003377 | 185    | 183        | unsp+PKC+PKB+RSK->unsp+PKB+RSK                              | unsp+PKC+PKB+RSK->unsp+PKB+RSK              | Uniprot PHOSPHOELM PhosphoSi | 6432   | SFRS7    | saslrnsSikgrYfssp       |
| IPI00003377 | 185    | 187        | unsp+PKC+cdc2->PKC+cdc2                                     | unsp+PKC+cdc2->unsp+cdc2                    | Uniprot                      | 6432   | SFRS7    | rsrsngsklgSYfsspsrsr    |
| IPI00003377 | 185    | 189        | unsp->                                                      | unsp->                                      |                              | 6432   | SFRS7    | rsrsngsklgSYfsspsrsr    |
| IPI00003419 | 174    | 171        | unsp+PKC->PKA                                               | unsp+PKC->unsp                              |                              | 10944  | C11orf58 | edpknkddakSnykmmfvkss   |
| IPI00003419 | 174    | 173        | unsp->                                                      | unsp->                                      |                              | 10944  | C11orf58 | pnknkddakSnykmmfvkssg   |
| IPI00003419 | 179    | 180        | ->PKC                                                       | ->PKC                                       |                              | 10944  | C11orf58 | ksnykmmfvkSgsgs-----    |
| IPI00003419 | 179    | 181        | PKA->PKC                                                    | PKA->                                       |                              |        |          |                         |

Table S3

|             |      |      |                                           |                                           |       |           |                       |
|-------------|------|------|-------------------------------------------|-------------------------------------------|-------|-----------|-----------------------|
| IPI00003443 | 214  | 211  | unsp+PKC->unsp                            | unsp+PKC->unsp                            | 3428  | IFI16     | qkrpvivkvISttkpfeyetp |
| IPI00003443 | 214  | 212  | unsp+PKC->PKC                             | unsp+PKC->PKC                             | 3428  | IFI16     | krpvivkvISttkpfeyetp  |
| IPI00003443 | 214  | 213  |                                           | ->DNAPK                                   | 3428  | IFI16     | rpvkvISttkpfeyetp     |
| IPI00003443 | 214  | 218  | INSR+unsp->INSR                           | INSR+unsp->INSR+unsp+EGFR                 | 3428  | IFI16     | kvISttkpfeyetp        |
| IPI00003482 | 110  | 105  | ATM+PKC+DNAPK->ATM+DNAPK                  | ATM+PKC+DNAPK->ATM+DNAPK                  | 1666  | DECRI     | vikataeqISttkpfeyetp  |
| IPI00003482 | 110  | 107  | PKC->                                     |                                           | 1666  | DECRI     | kataeqISttkpfeyetp    |
| IPI00003494 | 48   | 39   | unsp->unsp+cdc2                           |                                           | 9232  | PTTG1     | gpkaldgrSqvstrfgrkt   |
| IPI00003494 | 48   | 43   | unsp+PKC+cdk5+p38MAPK->unsp+cdk5+p38MAPK  | unsp+PKC+cdk5+p38MAPK->unsp+cdk5+p38MAPK  | 9232  | PTTG1     | kaldgrSqvstrfgrkt     |
| IPI00003494 | 48   | 49   |                                           | PKC->unsp+PKC                             | 9232  | PTTG1     | sqvstrfgrkt           |
| IPI00003495 | 601  | 599  | unsp->                                    | unsp->                                    | 9258  | MHAS1     | asphaayyvgTdrfpalpkah |
| IPI00003588 | 12   | 13   | ->CKI                                     |                                           | 9521  | EEF1E1    | aaalslekSlglskgnkys   |
| IPI00003588 | 12   | 17   | unsp+PKC->                                | unsp+PKC->                                | 9521  | EEF1E1    | lslelsklgSlgskgnysage |
| IPI00003588 | 138  | 139  | unsp+EGFR->unsp                           |                                           | 9521  | EEF1E1    | vdIvqeketTInsvrfchi   |
| IPI00003588 | 166  | 161  | unsp+PKC+RSK->unsp+PKC                    | unsp+PKC+RSK->PKC                         | 9521  | EEF1E1    | hpgpqrhISttkpfeyetp   |
| IPI00003588 | 166  | 170  | unsp->                                    |                                           | 9521  | EEF1E1    | ssvfknrlYtnsh-----    |
| IPI00003588 | 166  | 171  | PKA+RSK->RSK                              | PKA+RSK->                                 | 9521  | EEF1E1    | ssvfknrlYtnsh-----    |
| IPI00003766 | 172  | 173  |                                           | ->unsp                                    | 23474 | ETHE1     | rtdfqgacaktIlyshvheki |
| IPI00003766 | 172  | 175  | unsp->                                    |                                           | 23474 | ETHE1     | dfqgacaktIlyshvheki   |
| IPI00003766 | 172  | 177  | unsp+CKII->unsp+cdc2                      | unsp+CKII->unsp+cdc2+CKII                 | 23474 | ETHE1     | qfqqaktIlyshvheki     |
| IPI00003814 | 82   | 87   | PKC+PKA->PKC                              | PKC+PKA->PKC                              | 5608  | MAP2K6    | qimavkriraTvnsseqrlr  |
| IPI00003815 | 127  | 128  | unsp->                                    | unsp->                                    | 396   | ARHGDI    | vnreivsgmKtqhtyrkvk   |
| IPI00003815 | 141  | 144  | INSR+unsp->INSR                           |                                           | 396   | ARHGDI    | rkgyvdkdtdTmvgysgprae |
| IPI00003815 | 174  | 174  | unsp+PKC+DNAPK->unsp+PKA+DNAPK            | unsp+PKC+DNAPK->unsp+PKC+PKA+DNAPK        | 396   | ARHGDI    | eapkgmlargTyhnsfctd   |
| IPI00003815 | 178  | 176  | unsp+PKC->                                | unsp+PKC->                                | 396   | ARHGDI    | pkglmargTyhnsfctd     |
| IPI00003815 | 178  | 179  | unsp->                                    | unsp->                                    | 396   | ARHGDI    | mlargTyhnsfctd        |
| IPI00003815 | 178  | 182  | unsp+PKC+CKII->unsp+CKII                  |                                           | 396   | ARHGDI    | rsysyskrTdddktdhslw   |
| IPI00003817 | 21   | 20   | unsp+CKII->                               | unsp+CKII->ATM+unsp+CKII                  | 397   | ARHGDI    | veedddeISttkpfeyetp   |
| IPI00003817 | 21   | 24   | unsp->                                    |                                           | 397   | ARHGDI    | veedddeISttkpfeyetp   |
| IPI00003817 | 25   | 20   | unsp+CKII->                               | unsp+CKII->CKII                           | 397   | ARHGDI    | veedddeISttkpfeyetp   |
| IPI00003817 | 30   | 31   | unsp+PKG->unsp                            | unsp+PKG->                                | 397   | ARHGDI    | veedddeISttkpfeyetp   |
| IPI00003817 | 33   | 31   | unsp+PKG->                                | unsp+CKI+PKC->unsp+CKI+PKC+cdc2           | 397   | ARHGDI    | veedddeISttkpfeyetp   |
| IPI00003817 | 40   | 44   |                                           | ->INSR                                    | 397   | ARHGDI    | veedddeISttkpfeyetp   |
| IPI00003817 | 47   | 44   | unsp+CKI+PKC->unsp+CKI                    |                                           | 397   | ARHGDI    | veedddeISttkpfeyetp   |
| IPI00003817 | 102  | 98   | ->PKA                                     | ->PKA                                     | 397   | ARHGDI    | veedddeISttkpfeyetp   |
| IPI00003817 | 124  | 121  | PKC->                                     |                                           | 397   | ARHGDI    | veedddeISttkpfeyetp   |
| IPI00003817 | 175  | 171  | PKC->PKC+PKA                              |                                           | 397   | ARHGDI    | veedddeISttkpfeyetp   |
| IPI00003817 | 175  | 172  | unsp->                                    | unsp->EGFR                                | 397   | ARHGDI    | veedddeISttkpfeyetp   |
| IPI00003817 | 175  | 176  | unsp->                                    | unsp->                                    | 397   | ARHGDI    | veedddeISttkpfeyetp   |
| IPI00003833 | 158  | 157  | unsp+PKA->unsp+PKA+DNAPK                  | unsp+PKA->ATM+unsp+PKA+DNAPK              | 23768 | MTCH2     | rmvqfgrhISttkpfeyetp  |
| IPI00003865 | 71   | 66   | unsp+PKC->unsp                            |                                           | 3312  | HSPA8     | knvayvkrhISttkpfeyetp |
| IPI00003865 | 108  | 111  | PKC->                                     |                                           | 3312  | HSPA8     | knvayvkrhISttkpfeyetp |
| IPI00003865 | 108  | 113  | unsp+cdc2->cdc2                           | unsp+cdc2->cdc2                           | 3312  | HSPA8     | knvayvkrhISttkpfeyetp |
| IPI00003865 | 112  | 111  | PKC->CKI                                  | PKC->DNAPK                                | 3312  | HSPA8     | knvayvkrhISttkpfeyetp |
| IPI00003865 | 112  | 113  |                                           | unsp+cdc2->CKII+cdc2                      | 3312  | HSPA8     | knvayvkrhISttkpfeyetp |
| IPI00003865 | 246  | 254  | ->cdc2                                    |                                           | 3312  | HSPA8     | knvayvkrhISttkpfeyetp |
| IPI00003865 | 319  | 313  | unsp->unsp+PKA                            | unsp->unsp+PKA                            | 3312  | HSPA8     | knvayvkrhISttkpfeyetp |
| IPI00003865 | 512  | 511  | unsp+CKII->unsp+PKA                       | unsp+CKII->ATM+unsp+CKII+DNAPK            | 3312  | HSPA8     | knvayvkrhISttkpfeyetp |
| IPI00003865 | 531  | 537  | unsp+PKC+PKG->unsp+PKC+PKG+PKA            |                                           | 3312  | HSPA8     | knvayvkrhISttkpfeyetp |
| IPI00003865 | 589  | 586  | CKII->                                    | ->CKII                                    | 8192  | CLPP      | knvayvkrhISttkpfeyetp |
| IPI00003870 | 211  | 213  |                                           | PKC->                                     | 8192  | CLPP      | knvayvkrhISttkpfeyetp |
| IPI00003870 | 211  | 216  | PKC+PKA->PKC                              |                                           | 8192  | CLPP      | knvayvkrhISttkpfeyetp |
| IPI00003881 | 87   | 88   | unsp->                                    | unsp->                                    | 3185  | HNRNPF    | knvayvkrhISttkpfeyetp |
| IPI00003918 | 14   | 9    | unsp+PKC->PKA                             | unsp+PKC->PKC                             | 6124  | RPL4      | knvayvkrhISttkpfeyetp |
| IPI00003918 | 14   | 12   | unsp->                                    | unsp->                                    | 6124  | RPL4      | knvayvkrhISttkpfeyetp |
| IPI00003918 | 14   | 18   | unsp+PKC+PKA->unsp                        | unsp+PKC+PKA->unsp+PKC                    | 6124  | RPL4      | knvayvkrhISttkpfeyetp |
| IPI00003918 | 106  | 105  | PKC->                                     | PKC->DNAPK                                | 6124  | RPL4      | knvayvkrhISttkpfeyetp |
| IPI00003918 | 163  | 164  |                                           | PKC->unsp+PKC                             | 6124  | RPL4      | knvayvkrhISttkpfeyetp |
| IPI00003925 | 354  | 356  | PKA->                                     | PKA->                                     | 5162  | PDHB      | knvayvkrhISttkpfeyetp |
| IPI00003935 | 6    | 7    | unsp->                                    | unsp->                                    | 8349  | HIST2H2B  | knvayvkrhISttkpfeyetp |
| IPI00003935 | 12   | 7    | unsp->                                    | unsp->                                    | 8349  | HIST2H2B  | knvayvkrhISttkpfeyetp |
| IPI00003935 | 12   | 15   | unsp+PKC->PKC                             | unsp+PKC->PKC                             | 8349  | HIST2H2B  | knvayvkrhISttkpfeyetp |
| IPI00003935 | 13   | 15   | unsp+PKC->PKC                             |                                           | 8349  | HIST2H2B  | knvayvkrhISttkpfeyetp |
| IPI00003935 | 16   | 15   | unsp+PKC->unsp+PKC+PKA                    | unsp+PKC->ATM+unsp+PKC+DNAPK              | 8349  | HIST2H2B  | knvayvkrhISttkpfeyetp |
| IPI00003935 | 17   | 15   | unsp+PKC->PKC+PKA                         | unsp+PKC->PKC+PKA                         | 8349  | HIST2H2B  | knvayvkrhISttkpfeyetp |
| IPI00003935 | 21   | 15   | unsp+PKC->unsp+PKC+PKA                    | unsp+PKC->unsp+PKC+PKA                    | 8349  | HIST2H2B  | knvayvkrhISttkpfeyetp |
| IPI00003935 | 21   | 20   | unsp->                                    | PKC->DNAPK                                | 8349  | HIST2H2B  | knvayvkrhISttkpfeyetp |
| IPI00003935 | 109  | 113  | unsp->                                    |                                           | 8349  | HIST2H2B  | knvayvkrhISttkpfeyetp |
| IPI00003935 | 121  | 120  |                                           | ->ATM+DNAPK                               | 8349  | HIST2H2B  | knvayvkrhISttkpfeyetp |
| IPI00003935 | 121  | 123  |                                           | PKC->                                     | 8349  | HIST2H2B  | knvayvkrhISttkpfeyetp |
| IPI00003949 | 10   | 12   | unsp->PKC                                 |                                           | 7334  | UBE2N     | knvayvkrhISttkpfeyetp |
| IPI00003949 | 94   | 96   | ->p38MAPK                                 |                                           | 7334  | UBE2N     | knvayvkrhISttkpfeyetp |
| IPI00003965 | 595  | 592  | PKC->PKA                                  | PKC->PKC+PKA                              | 7874  | USP7      | knvayvkrhISttkpfeyetp |
| IPI00003965 | 595  | 600  | PKA->cdc2                                 | PKA->cdc2                                 | 7874  | USP7      | knvayvkrhISttkpfeyetp |
| IPI00003965 | 1096 | 1091 | EGFR->                                    | EGFR->                                    | 7874  | USP7      | knvayvkrhISttkpfeyetp |
| IPI00003965 | 1096 | 1092 | unsp+PKC->unsp+PKA                        | unsp+PKC->unsp                            | 7874  | USP7      | knvayvkrhISttkpfeyetp |
| IPI00004233 | 993  | 988  | PKC+cdc2->cdc2                            | PKC+cdc2->cdc2                            | 4288  | MKI67     | knvayvkrhISttkpfeyetp |
| IPI00004233 | 1165 | 1169 | unsp+PKC->                                |                                           | 4288  | MKI67     | knvayvkrhISttkpfeyetp |
| IPI00004233 | 1639 | 1635 | unsp+PKC->unsp+RSK                        | unsp+PKC->PKG                             | 4288  | MKI67     | knvayvkrhISttkpfeyetp |
| IPI00004233 | 1639 | 1636 | PKC->PKA                                  | unsp+PKC->PKC                             | 4288  | MKI67     | knvayvkrhISttkpfeyetp |
| IPI00004233 | 1938 | 1937 |                                           | unsp+PKC+cdc2->ATM+unsp+PKC+cdc2+DNAPK    | 4288  | MKI67     | knvayvkrhISttkpfeyetp |
| IPI00004233 | 2264 | 2259 | unsp+PKG->unsp+PKG+PKA                    |                                           | 4288  | MKI67     | knvayvkrhISttkpfeyetp |
| IPI00004233 | 2421 | 2420 |                                           | unsp+PKC->ATM+unsp+PKC+DNAPK              | 4288  | MKI67     | knvayvkrhISttkpfeyetp |
| IPI00004344 | 79   | 81   | PKG->PKC                                  |                                           | 27125 | AF4       | knvayvkrhISttkpfeyetp |
| IPI00004344 | 79   | 85   |                                           | unsp+CKII->unsp                           | 27125 | AF4       | knvayvkrhISttkpfeyetp |
| IPI00004350 | 12   | 4    | ->cdc2                                    |                                           | 2957  | GTF2A1    | knvayvkrhISttkpfeyetp |
| IPI00004350 | 12   | 7    | PKC->                                     |                                           | 2957  | GTF2A1    | knvayvkrhISttkpfeyetp |
| IPI00004350 | 12   | 16   | unsp+PKG->unsp+PKG+CKII                   |                                           | 2957  | GTF2A1    | knvayvkrhISttkpfeyetp |
| IPI00004358 | 316  | 315  | unsp+PKC->PKC+PKA                         | unsp+PKC->ATM+unsp                        | 5834  | PYG8      | knvayvkrhISttkpfeyetp |
| IPI00004358 | 811  | 809  | unsp+PKC->PKC                             | unsp+PKC->PKC                             | 5834  | PYG8      | knvayvkrhISttkpfeyetp |
| IPI00004358 | 811  | 813  | unsp->CKI                                 | unsp->unsp+CKI                            | 5834  | PYG8      | knvayvkrhISttkpfeyetp |
| IPI00004363 | 351  | 356  |                                           | ->p38MAPK                                 | 5834  | PYG8      | knvayvkrhISttkpfeyetp |
| IPI00004461 | 56   | 52   | ->PKA                                     |                                           | 27347 | STK39     | knvayvkrhISttkpfeyetp |
| IPI00004461 | 56   | 53   | PKC->                                     | PKC->                                     | 1716  | DGUOK     | knvayvkrhISttkpfeyetp |
| IPI00004461 | 56   | 59   | PKC+p38MAPK->PKC                          |                                           | 1716  | DGUOK     | knvayvkrhISttkpfeyetp |
| IPI00004461 | 275  | 272  | PKC->                                     | PKC->                                     | 1716  | DGUOK     | knvayvkrhISttkpfeyetp |
| IPI00004845 | 45   | 41   | ->PKA                                     |                                           | 25934 | NIPSNAP3A | knvayvkrhISttkpfeyetp |
| IPI00004845 | 45   | 43   | EGFR->                                    |                                           | 25934 | NIPSNAP3A | knvayvkrhISttkpfeyetp |
| IPI00004845 | 45   | 47   | unsp+PKA->                                | unsp+PKA->unsp                            | 25934 | NIPSNAP3A | knvayvkrhISttkpfeyetp |
| IPI00004845 | 48   | 43   | unsp+PKA->PKA                             | EGFR->                                    | 25934 | NIPSNAP3A | knvayvkrhISttkpfeyetp |
| IPI00004845 | 48   | 47   | unsp+PKC->PKA                             | unsp+PKA->unsp                            | 25934 | NIPSNAP3A | knvayvkrhISttkpfeyetp |
| IPI00004859 | 755  | 754  | unsp+PKC->PKC+cdc2                        | unsp+PKC->ATM+unsp+DNAPK                  | 25934 | NIPSNAP3A | knvayvkrhISttkpfeyetp |
| IPI00004859 | 863  | 856  | PKC->                                     |                                           | 641   | BLM       | knvayvkrhISttkpfeyetp |
| IPI00004859 | 1411 | 1413 | PKG+PKA->                                 | PKG+PKA->                                 | 641   | BLM       | knvayvkrhISttkpfeyetp |
| IPI00004859 | 1411 | 1414 | unsp->                                    | unsp->                                    | 641   | BLM       | knvayvkrhISttkpfeyetp |
| IPI00004860 | 60   | 61   |                                           | unsp+PKA->PKA                             | 5917  | RARS      | knvayvkrhISttkpfeyetp |
| IPI00004860 | 205  | 200  |                                           | CKI+p38MAPK->p38MAPK                      | 5917  | RARS      | knvayvkrhISttkpfeyetp |
| IPI00004924 | 225  | 222  | ->EGFR                                    | ->EGFR                                    | 50619 | DEF6      | knvayvkrhISttkpfeyetp |
| IPI00004968 | 122  | 121  | unsp->unsp+DNAPK                          |                                           | 27339 | PRPF19    | knvayvkrhISttkpfeyetp |
| IPI00005045 | 261  | 264  | unsp+PKC->PKC                             |                                           | 27339 | PRPF19    | knvayvkrhISttkpfeyetp |
| IPI00005045 | 8    | 3    | PKC->                                     | PKC->                                     | 10061 | ABCF2     | knvayvkrhISttkpfeyetp |
| IPI00005045 | 8    | 3    | PKC->                                     | PKC->                                     | 10061 | ABCF2     | knvayvkrhISttkpfeyetp |
| IPI00005045 | 304  | 305  | unsp->                                    | unsp->                                    | 10061 | ABCF2     | knvayvkrhISttkpfeyetp |
| IPI00005132 | 502  | 511  | unsp+GSK3+PKA+RSK->unsp+GSK3+cdc2+PKA+RSK | unsp+GSK3+PKA+RSK->unsp+GSK3+cdc2+PKA+RSK | 54552 | GNL3L     | knvayvkrhISttkpfeyetp |
| IPI00005154 | 33   | 26   | unsp+PKA->unsp+cdc2+PKA                   |                                           | 6749  | SSRP1     | knvayvkrhISttkpfeyetp |
| IPI00005154 | 33   | 35   | unsp+PKC->PKC                             | unsp+PKC->                                | 6749  | SSRP1     | knvayvkrhISttkpfeyetp |
| IPI00005154 | 33   | 37   | PKC->                                     |                                           | 6749  | SSRP1     | knvayvkrhISttkpfeyetp |
| IPI00005154 | 90   | 86   | CKII+cdc2->PKA+CKII+cdc2                  |                                           | 6749  | SSRP1     | knvayvkrhISttkpfeyetp |
| IPI00005154 | 233  | 232  |                                           | unsp->unsp+EGFR                           | 6749  | SSRP1     | knvayvkrhISttkpfeyetp |
| IPI00005154 | 233  | 236  | INSR+unsp+EGFR->                          | INSR+unsp+EGFR->                          | 6749  | SSRP1     | knvayvkrhISttkpfeyetp |
| IPI00005154 | 413  | 411  | SRC+unsp+EGFR->SRC                        |                                           | 6749  | SSRP1     | knvayvkrhISttkpfeyetp |
| IPI00005154 | 548  | 552  | unsp+PKG+PKA+RSK->unsp+PKG+PKA            |                                           | 6749  | SSRP1     | knvayvkrhISttkpfeyetp |
| IPI00005159 | 299  | 295  | PKC->                                     | PKC->                                     | 10097 | ACTR2     | knvayvkrhISttkpfeyetp |
| IPI00005159 | 299  | 298  | unsp->                                    | unsp->                                    | 10097 | ACTR2     | knvayvkrhISttkpfeyetp |
| IPI00005159 | 299  | 304  | unsp+PKC+PKA->PKC                         | unsp+PKC+PKA->PKC                         | 10097 | ACTR2     | knvayvkrhISttkpfeyetp |
| IPI00005159 | 322  | 315  | CKII->cdc2+CKII                           |                                           | 10097 | ACTR2     | knvayvkrhISttkpfeyetp |
| IPI00005160 | 82   | 80   | PKC->                                     | PKC->                                     | 10095 | ARPC1B    | knvayvkrhISttkpfeyetp |
| IPI00005161 | 275  | 271  | PKC->PKA                                  | PKC->PKA                                  | 10109 | ARPC2     | knvayvkrhISttkpfeyetp |

Table S3

|             |      |      |                                                     |                                              |       |           |                         |
|-------------|------|------|-----------------------------------------------------|----------------------------------------------|-------|-----------|-------------------------|
| IPI00005161 | 295  | 293  | PKC->                                               | PKC->                                        | 10109 | ARPC2     | daekkemktiTgktfssr--    |
| IPI00005161 | 295  | 298  | unsp+PKC->PKC                                       | unsp+PKC->PKC                                | 10109 | ARPC2     | emkttgktfssr-----       |
| IPI00005162 | 56   | 58   |                                                     | ->unsp                                       | 10094 | ARPC3     | yfkavvfknYeikneadrtl    |
| IPI00005347 | 260  | 262  | PKG->PKC                                            | PKG->                                        | 54764 | ZRANB1    | lkqknrmkkt1dwlfnacvg    |
| IPI00005367 | 9    | 8    | unsp+CKI+GSK3->unsp+CKI+GSK3+p38MAPK                |                                              | 51422 | PKAG2     | mdkdkkdvdsPgpgsggkknna  |
| IPI00005367 | 10   | 8    | unsp+PKC->cdc2                                      | unsp+PKC->                                   | 51422 | PKAG2     | ---msavmtdTKtkdsvsspg   |
| IPI00005492 | 112  | 110  | PKC->                                               | PKC->                                        | 11091 | WDR5      | nlivsaddkTKlkwdvssgk    |
| IPI00005502 | 642  | 633  | unsp+GSK3+cdk5+p38MAPK->unsp+GSK3+cdk5+cdc2+p38MAPK |                                              | 1822  | ATN1      | asspagyktaSppgpppygkr   |
| IPI00005502 | 642  | 640  | EGFR->                                              |                                              | 1822  | ATN1      | ktaspppppyYgkrapspgay   |
| IPI00005502 | 642  | 646  | unsp+GSK3+cdk5+PKA->unsp+GSK3+cdk5                  | unsp+GSK3+cdk5+PKA->unsp+GSK3+cdk5+cdc2      | 1822  | ATN1      | gpppygkrpSpgayktatp     |
| IPI00005578 | 327  | 323  | unsp->unsp+PKA                                      |                                              | 30844 | EHD4      | iisylkkempSvfgkenkkr    |
| IPI00005578 | 327  | 336  | ->cdc2                                              | ->cdc2                                       | 30844 | EHD4      | gkenkkrelSrpeiqiqlq     |
| IPI00005614 | 1913 | 1918 | unsp+PKA->                                          |                                              | 6711  | SPTBN1    | vdtdgkfrfTsmvrdmlwme    |
| IPI00005630 | 117  | 121  | unsp+GSK3+cdk5->unsp+cdk5                           |                                              | 1869  | E2F1      | rrrhpqgkvkSpgekryets    |
| IPI00005630 | 120  | 121  | unsp+GSK3+cdk5->unsp+CKII+p38MAPK                   |                                              | 1869  | E2F1      | rrrhpqgkvkSpgekryets    |
| IPI00005630 | 120  | 126  |                                                     | unsp+CKII->unsp                              | 1869  | E2F1      | gkvkspgekSryetsnlitt    |
| IPI00005630 | 125  | 121  |                                                     | unsp+GSK3+cdk5->unsp+cdk5                    | 1869  | E2F1      | rrrhpqgkvkSpgekryets    |
| IPI00005630 | 125  | 128  | INSR+unsp->                                         | INSR+unsp->unsp                              | 1869  | E2F1      | gkvkspgekSryetsnlittkr  |
| IPI00005630 | 125  | 131  | ->PKA+cdc2                                          | ->cdc2                                       | 1869  | E2F1      | spgekryetsnlittkrflr    |
| IPI00005648 | 424  | 415  | PKA->cdc2+PKA                                       |                                              | 9667  | SAFB2     | sgmlwvsglSsattatdln     |
| IPI00005648 | 424  | 417  | unsp+PKC->unsp+PKC+cdc2                             |                                              | 9667  | SAFB2     | mlwvsglSsattatdln       |
| IPI00005648 | 424  | 421  | PKC+cdc2->                                          | PKC+cdc2->                                   | 9667  | SAFB2     | vsglsstratDlknflsfkyg   |
| IPI00005648 | 424  | 428  | PKC->                                               |                                              | 9667  | SAFB2     | tratlclnflSkkygkvqkv    |
| IPI00005648 | 429  | 421  |                                                     | PKC+cdc2->PKC                                | 9667  | SAFB2     | vsglsstratDlknflsfkyg   |
| IPI00005648 | 429  | 428  | PKC->                                               | PKC->DNAPK                                   | 9667  | SAFB2     | tratlclnflSkkygkvqkv    |
| IPI00005648 | 616  | 613  | PKC->PKC+CKII                                       | PKC->CKII+PKC+CKII                           | 9667  | SAFB2     | seskekrdilSfdkikeqer    |
| IPI00005648 | 829  | 825  |                                                     | ->EGFR                                       | 9667  | SAFB2     | grdsrdgwgYgsdkrlsegr    |
| IPI00005648 | 829  | 827  | PKC->                                               | PKC->                                        | 9667  | SAFB2     | dsrdgwgYgsdkrlsegrl     |
| IPI00005648 | 829  | 832  | unsp+PKA->unsp+cdc2                                 | unsp+PKA->unsp+cdc2                          | 9667  | SAFB2     | wggygsdkrlSsegrlpppr    |
| IPI00005657 | 21   | 24   | unsp+PKC->unsp+cdc2                                 | unsp+PKC->unsp+PKC+cdc2                      | 10471 | PFN6      | ekyqlqldlSkmsgrkgle     |
| IPI00005657 | 21   | 26   | unsp+cdc2->cdc2                                     | unsp+cdc2->cdc2                              | 10471 | PFN6      | yqqlqldlSkmsgrkgle      |
| IPI00005658 | 54   | 57   |                                                     | unsp+PKA->unsp+PKC+PKA                       | 8266  | UBL4A     | gkaladgkrlSdsygsnsl     |
| IPI00005658 | 54   | 59   | INSR+unsp->unsp                                     | INSR+unsp->unsp                              | 8266  | UBL4A     | aladgkrlSdsygsnsl       |
| IPI00005668 | 4    | 3    |                                                     | ->ATM+DNAPK                                  | 1646  | AKR1C2    | -----mdSkyyqkvclndg     |
| IPI00005668 | 33   | 32   | ->PKA                                               | ->ATM+DNAPK                                  | 1646  | AKR1C2    | gtyapaevpkSkaleavklai   |
| IPI00005668 | 161  | 166  | unsp+PKA->                                          | unsp+PKA->                                   | 1646  | AKR1C2    | daglaksgvSfnhrilemi     |
| IPI00005668 | 246  | 251  | PKG+PKA+p38MAPK->p38MAPK                            |                                              | 1646  | AKR1C2    | lcalakkhkrTpalialryql   |
| IPI00005677 | 128  | 125  | PKC->                                               | PKC->CKI                                     | 8443  | GNPAT     | rlgairfcaTlsvkfkiqfs    |
| IPI00005677 | 128  | 127  | PKC+cdc2->cdc2                                      | PKC+cdc2->ATM+cdc2+DNAPK                     | 8443  | GNPAT     | gaifrcattSkvqkfiskv     |
| IPI00005744 | 30   | 32   | PKA->                                               |                                              | 6473  | SHOX      | gggggggkklSityrevlesg   |
| IPI00005744 | 30   | 34   | unsp+PKC->unsp                                      | PKC+PKG->                                    | 6473  | SHOX      | gggggggkklSityrevlesgla |
| IPI00005792 | 207  | 209  | PKC+PKG->PKC                                        | unsp+PKC->unsp+PKC+cdc2                      | 8106  | PABPN1    | nrvtlcldkfSgphkgfayie   |
| IPI00005966 | 47   | 44   |                                                     | SRC+unsp->SRC+unsp+EGFR                      | 55967 | NDUFA12   | kvgtlgedkYgnkyednnk     |
| IPI00005969 | 97   | 95   | unsp+PKC+PKG->PKG                                   | unsp+PKC+PKG->                               | 829   | CAPZA1    | srldprnklSfdkhlrkea     |
| IPI00005969 | 273  | 267  |                                                     | PKC->PKC+cdc2                                | 829   | CAPZA1    | alrrqlpvtrTKidwnkilsy   |
| IPI00005969 | 273  | 276  | unsp+PKC->PKC                                       | unsp+PKC->PKC                                | 829   | CAPZA1    | rtkidwnklSykigkemqna    |
| IPI00005978 | 36   | 44   | EGFR->INSR+EGFR                                     | EGFR->INSR+EGFR                              | 6427  | SFRS2     | fekygrvgdvYiprdyrtkes   |
| IPI00006034 | 23   | 19   | ->PKA                                               | ->unsp                                       | 1397  | CRIP2     | dktyvfaekvSglgdwhhkf    |
| IPI00006034 | 23   | 20   | PKC->                                               | PKC->                                        | 1397  | CRIP2     | ktvryfaekvSglgdwhhkf    |
| IPI00006077 | 30   | 25   | unsp+PKC+DNAPK->unsp+DNAPK                          | unsp+PKC+DNAPK->PKC+DNAPK                    | 9767  | PHF16     | espsstfsgSmyrnkskipn    |
| IPI00006077 | 30   | 31   | unsp+PKC+PKG->unsp+PKC                              | unsp+PKC+PKG->unsp+PKC                       | 9767  | PHF16     | ftsgsmynrkSkipnehkpa    |
| IPI00006077 | 32   | 25   | unsp+PKC+DNAPK->unsp+PKC+cdc2+DNAPK                 |                                              | 9767  | PHF16     | espsstfsgSmyrnkskipn    |
| IPI00006077 | 32   | 31   | unsp+PKC+PKG->unsp+PKC                              | unsp+PKC+PKG->ATM+unsp+DNAPK                 | 9767  | PHF16     | ftsgsmynrkSkipnehkpa    |
| IPI00006077 | 638  | 635  | PKC+PKA+cdc2->PKA+cdc2                              | PKC+PKA+cdc2->PKA+cdc2                       | 9767  | PHF16     | tpsechygqSglkplvqaa     |
| IPI00006077 | 735  | 733  | EGFR->                                              |                                              | 9767  | PHF16     | wvntedlqcyvktknmspk     |
| IPI00006077 | 735  | 737  | PKC+PKG->PKG                                        | PKC+PKG->                                    | 9767  | PHF16     | tedlqcyvktknmspk        |
| IPI00006077 | 738  | 733  | EGFR->                                              | EGFR->                                       | 9767  | PHF16     | wvntedlqcyvktknmspk     |
| IPI00006077 | 738  | 737  | PKC+PKG->PKG                                        | PKC+PKG->                                    | 9767  | PHF16     | tedlqcyvktknmspk        |
| IPI00006077 | 738  | 741  | unsp->unsp+PKG                                      | unsp->unsp+PKG                               | 9767  | PHF16     | qcyvktknmspk            |
| IPI00006079 | 152  | 148  | unsp+cdk5+cdc2+RSK->unsp+cdk5+RSK                   |                                              | 9774  | BCLAF1    | spssssrsSpyskpsvkskr    |
| IPI00006079 | 152  | 151  |                                                     | unsp->unsp+DNAPK                             | 9774  | BCLAF1    | ssssrsSpyskpsvkskr      |
| IPI00006079 | 152  | 153  | unsp+cdk5+p38MAPK->cdk5+cdc2+p38MAPK                | unsp+cdk5+p38MAPK->cdk5+cdc2+p38MAPK         | 9774  | BCLAF1    | ssssrsSpyskpsvkskrsgqe  |
| IPI00006079 | 335  | 333  | unsp+PKC->                                          | unsp+PKC->                                   | 9774  | BCLAF1    | pdggdqetaktgklfrtde     |
| IPI00006079 | 437  | 431  | unsp+CKI+CKII->unsp+CKII                            |                                              | 9774  | BCLAF1    | ksfatashmTeegglykysk    |
| IPI00006079 | 437  | 438  | INSR+unsp->                                         |                                              | 9774  | BCLAF1    | hmrteegglykyskylgrr     |
| IPI00006079 | 437  | 440  | unsp+cdc2->cdc2                                     | unsp+cdc2->cdc2                              | 9774  | BCLAF1    | hmrteegglykyskylgrr     |
| IPI00006079 | 637  | 637  | unsp+PKA+RSK->PKA+RSK                               |                                              | 9774  | BCLAF1    | saamlnerfTsykateehst    |
| IPI00006079 | 637  | 634  | unsp+PKA+RSK->PKA+RSK                               | unsp+PKA+RSK->unsp+PKA                       | 9774  | BCLAF1    | aamlnerfTsykateehst     |
| IPI00006079 | 637  | 635  | EGFR->                                              | EGFR->unsp+EGFR                              | 9774  | BCLAF1    | amtlnerfTsykateehst     |
| IPI00006091 | 1017 | 1012 | unsp+PKC->unsp                                      |                                              | 1756  | DMD       | tvkmskkapSeisrkyasef    |
| IPI00006091 | 1017 | 1015 | unsp+PKC->                                          | unsp+PKC->                                   | 1756  | DMD       | emskkapselSryqsefeei    |
| IPI00006108 | 138  | 140  |                                                     | unsp+PKC+PKG->unsp+PKG                       | 9794  | MAML1     | ygdllpgkhkTtreeplgai    |
| IPI00006108 | 321  | 319  | unsp+cdc2->cdc2                                     | unsp+cdc2->cdc2                              | 7161  | TP73      | yreqalnesSakngaaskra    |
| IPI00006108 | 327  | 326  | cdc2->PKA                                           | unsp+PKC+cdc2->ATM+unsp+PKC+cdc2+DNAPK       | 7161  | TP73      | nessakngaaSkrafnqsspa   |
| IPI00006164 | 210  | 207  | cdc2->PKA                                           | cdc2->                                       | 80895 | ILKAP     | hdeeflqkqSsqkpwkdgfs    |
| IPI00006164 | 210  | 208  | unsp+PKC+cdc2+DNAPK->cdc2+DNAPK                     | unsp+PKC+cdc2+DNAPK->cdc2+DNAPK              | 80895 | ILKAP     | hdeeflqkqSsqkpwkdgfs    |
| IPI00006164 | 210  | 217  | ->PKA                                               | ->PKA                                        | 80895 | ILKAP     | ssqkpwkdgfsStatclavdn   |
| IPI00006171 | 1262 | 1265 | ->cdc2                                              | ->cdc2                                       | 4798  | NFRKB     | ktlagnkpvSftaqqllql     |
| IPI00006176 | 494  | 485  |                                                     | unsp+cdc2+CKII->unsp+CKII                    | 9146  | HGS       | aqirdargalSalreehrekl   |
| IPI00006181 | 53   | 49   | PKC->                                               | PKC->                                        | 8664  | E1F3D     | lgkvadwtgaTyqdrytnky    |
| IPI00006181 | 53   | 55   | INSR+unsp->unsp                                     | INSR+unsp->unsp+EGFR                         | 8664  | E1F3D     | wtgatyqdkrYtnkyssqfgg   |
| IPI00006181 | 53   | 56   | unsp+PKC->PKC                                       | unsp+PKC->PKC                                | 8664  | E1F3D     | tgatyqdkrYtnkyssqfgg    |
| IPI00006204 | 315  | 320  | unsp+PKC->                                          | unsp+PKC->                                   | 9195  | CKNAB3    | gywykldkqVSeqdkgkqkv    |
| IPI00006213 | 399  | 398  | PKC->CKI                                            | PKC->ATM                                     | 1109  | PCN1      | rlzdekelvSimmjldkqkv    |
| IPI00006252 | 33   | 30   | PKC+cdc2->PKA+cdc2                                  | PKC+cdc2->cdc2                               | 9255  | AIMP1     | qileykqkvSilkeakilaq    |
| IPI00006379 | 441  | 440  |                                                     | unsp+PKC->unsp+PKC+DNAPK                     | 51602 | NOP58     | psgdtpktSkrrkieqvdk     |
| IPI00006379 | 460  | 455  | unsp+CKI+PKC->unsp+CKI                              | unsp+CKI+PKC->unsp+PKC                       | 51602 | NOP58     | ieqvdkedeiTekkakkakik   |
| IPI00006379 | 461  | 455  | unsp+CKI+PKC->unsp+PKC+CKII                         |                                              | 51602 | NOP58     | ieqvdkedeiTekkakkakik   |
| IPI00006440 | 208  | 199  | ->cdc2                                              | unsp+CKI+PKC->unsp+PKC                       | 51081 | MRP57     | tecdkikhqrTlmpelshlki   |
| IPI00006440 | 208  | 206  | unsp->cdc2+PKA                                      |                                              | 51081 | MRP57     | hqrTlmpelshlki          |
| IPI00006475 | 144  | 142  | unsp->                                              | unsp->PKA                                    | 51619 | UBE2D4    | ekynrlarewTgkyam----    |
| IPI00006579 | 60   | 56   | ->PKA                                               | unsp->DNAPK                                  | 1327  | Cox411    | lpxvahvklSasqalkakeke   |
| IPI00006579 | 60   | 58   | ATM+unsp+PKC+DNAPK->ATM+PKC+DNAPK                   | ATM+unsp+PKC+DNAPK->ATM+PKC+DNAPK            | 1327  | Cox411    | evahvklSasqalkakeke     |
| IPI00006601 | 153  | 154  |                                                     | ->unsp                                       | 1114  | CHGB      | sdsqsvsekvThseksredg    |
| IPI00006601 | 153  | 157  | unsp+PKC+PKA->unsp+PKA                              | unsp+PKC+PKA->unsp+PKC                       | 1114  | CHGB      | qsvsekvThseksredg       |
| IPI00006601 | 153  | 160  | unsp+CKI+CKII+DNAPK->ATM+unsp+CKI+CKII+DNAPK        | unsp+CKI+CKII+DNAPK->ATM+unsp+CKI+CKII+DNAPK | 1114  | CHGB      | eevktvThseksredg        |
| IPI00006663 | 355  | 354  |                                                     | unsp+CKII->unsp+CKII+DNAPK                   | 217   | ALDH2     | ksrvvgnpfdSkteqpgvde    |
| IPI00006863 | 166  | 161  | unsp+PKC+cdc2->unsp+cdc2                            | unsp+PKC+cdc2->unsp+cdc2                     | 9552  | SPAG7     | qgqvvpvpsaDydkyishli    |
| IPI00006865 | 38   | 35   | PKC+cdc2+DNAPK->ATM+cdc2+DNAPK                      | PKC+cdc2+DNAPK->ATM+cdc2+DNAPK               | 9554  | SEC22B    | qsgrldqqyqSaqklfrlkn    |
| IPI00006932 | 188  | 182  |                                                     | unsp+CKII->unsp                              | 51631 | LUC7L2    | kriateeqeSaeavaakaerv   |
| IPI00006935 | 47   | 44   | unsp+PKC->unsp                                      | unsp+PKC->unsp                               | 56648 | E1F5A2    | kgpckvkmstSktgkhgha     |
| IPI00006935 | 47   | 45   | unsp+PKC->                                          | unsp+PKC->                                   | 56648 | E1F5A2    | kgpckvkmstSktgkhgha     |
| IPI00006935 | 47   | 46   |                                                     | ->ATM+DNAPK                                  | 56648 | E1F5A2    | kgpckvkmstSktgkhgha     |
| IPI00006935 | 47   | 48   |                                                     | PKC->unsp+PKC                                | 56648 | E1F5A2    | kgpckvkmstSktgkhgha     |
| IPI00006935 | 68   | 65   | PKC->PKC+CKII                                       | PKC->PKC+CKII                                | 56648 | E1F5A2    | kgpckvkmstSktgkhgha     |
| IPI00006937 | 8    | 5    | ->EGFR                                              | ->EGFR                                       | 51465 | UBE2J1    | -----metrYnlkspavkr     |
| IPI00006937 | 8    | 9    | unsp+GSK3+cdk5+p38MAPK->GSK3+p38MAPK                | unsp+GSK3+cdk5+p38MAPK->cdk5+p38MAPK         | 51465 | UBE2J1    | --metrYnlkspavkr        |
| IPI00006952 | 247  | 246  | unsp->unsp+EGFR                                     | unsp->unsp+EGFR                              | 51110 | LACTB2    | ftvmelvkiiYkntpenihem   |
| IPI00006952 | 247  | 249  | unsp->                                              | ->CKII                                       | 51110 | LACTB2    | ftvmelvkiiYkntpenihem   |
| IPI00006980 | 20   | 23   | ->CKII                                              | ->unsp+PKG                                   | 51637 | C14orf166 | npagfndkdeTefnwile      |
| IPI00006987 | 17   | 13   | ->unsp+PKA                                          |                                              | 57062 | DX24      | lctdkspkqSscgkftgkqj    |
| IPI00006987 | 17   | 14   | PKC->                                               |                                              | 57062 | DX24      | lctdkspkqSscgkftgkqj    |
| IPI00006987 | 71   | 67   | PKC->                                               | PKC->unsp                                    | 57062 | DX24      | qlvspankpsSfiskeapkrkr  |
| IPI00006987 | 71   | 70   | unsp+PKC->unsp+CKI+PKC                              | unsp+PKC->ATM+unsp+PKC+DNAPK                 | 57062 | DX24      | spaknpssfSkeapkrkqaq    |
| IPI00007004 | 208  | 203  | PKC->                                               |                                              | 51018 | RRP15     | ssmrkrakliStvskdfisv    |
| IPI00007004 | 208  | 206  | unsp+PKC->unsp                                      | unsp+PKC->unsp                               | 51018 | RRP15     | rrkraklistvskdfisv      |
| IPI00007058 | 233  | 236  | PKC->                                               |                                              | 57175 | CORO1B    | aifladgkvTtfgfsmserq    |
| IPI00007058 | 233  | 240  | unsp->unsp+cdc2                                     | unsp->unsp+cdc2                              | 57175 | CORO1B    | adgkvTtfgfsmserq        |
| IPI00007074 | 146  | 138  | unsp+cdc2+RSK->unsp+PKA+cdc2+RSK                    |                                              | 8565  | YARS      | eytlidyrrvSvtdghdkka    |
| IPI00007074 | 146  | 141  | CKI+PKC->                                           | CKI+PKC->                                    | 8565  | YARS      | ldvryssvTghdskagaq      |
| IPI00007074 | 146  | 145  |                                                     | unsp->ATM+unsp                               | 8565  | YARS      | rlsvvtqhdSkkagaevvqk    |
| IPI00007074 | 147  | 141  | CKI+PKC->PKC                                        | CKI+PKC->PKC                                 | 8565  | YARS      | ldvryssvTghdskagaq      |
| IPI00007074 | 147  | 145  | unsp->cdc2                                          | unsp->                                       | 8565  | YARS      | rlsvvtqhdSkkagaevvqk    |
| IPI00007074 | 197  | 193  | PKC+PKG->PKG                                        | PKC+PKG->PKG                                 | 8565  | YARS      | fggidgkrlTfaelypalg     |
| IPI00007074 | 197  | 198  | unsp->                                              | unsp->                                       | 8565  | YARS      | qrktfaekYlpalgyskrv     |
| IPI00007074 | 197  | 205  | ->cdc2                                              | ->cdc2                                       | 8565  | YARS      | aekylpalgySkrvhlmpmv    |
| IPI00007074 | 206  | 205  | ->cdc2+PKA                                          | ->ATM                                        | 8565  | YARS      | aekylpalgySkrvhlmpmv    |
| IPI00007074 | 474  | 472  | EGFR->                                              |                                              | 8565  | YARS      | apgehvfvkgYekgdpdeek    |

Table S3

|             |      |      |                                       |  |                                                 |       |          |                        |
|-------------|------|------|---------------------------------------|--|-------------------------------------------------|-------|----------|------------------------|
| IP100007088 | 169  | 165  | unsp+CKI->unsp                        |  |                                                 | 10393 | ANAPC10  | ikiytpveeSigkfrprctt   |
| IP100007088 | 169  | 166  | unsp+CKI->CKI                         |  |                                                 | 10393 | ANAPC10  | ikiytpveeSigkfrprctt   |
| IP100007088 | 169  | 174  | unsp+CKI+PKG+PKA->unsp                |  | unsp+PKC+PKG+PKA->unsp+PKG                      | 10393 | ANAPC10  | essigkfrprcttIdfmmysri |
| IP100007123 | 86   | 83   | ->PKA                                 |  | ->CaM-II                                        | 10393 | ANAPC10  | ssigkfrprcttIdfmmysri  |
| IP100007128 | 197  | 192  | ->PKA                                 |  |                                                 | 27330 | RPS5K6A6 | feilkviggSgkSgklyvrk   |
| IP100007188 | 23   | 22   | ->PKA                                 |  |                                                 | 5582  | PKCG     | niipmdpnsgSgpyvklkip   |
| IP100007188 | 96   | 95   |                                       |  | ->DNAPK                                         | 292   | SLC25A5  | flagvvaaiSktaavierv    |
| IP100007188 | 105  | 107  | PKG->                                 |  | INSR+unsp->INSR+unsp+EGFR                       | 292   | SLC25A5  | qalnfafdkYkqiflgdvdk   |
| IP100007188 | 166  | 167  | ->PKC                                 |  | PKG->                                           | 292   | SLC25A5  | qiflggvdKtqfwrlyfagnl  |
| IP100007189 | 135  | 138  | p38MAPK->GSK3+p38MAPK                 |  | ->PKC                                           | 292   | SLC25A5  | lgdclviykSdgiklyvgqf   |
| IP100007189 | 144  | 138  |                                       |  |                                                 | 998   | CD42     | klaknkqkpiTpetaeclard  |
| IP100007247 | 60   | 65   | unsp+PKC+PKG->unsp+PKC                |  | p38MAPK->GSK3+p38MAPK                           | 998   | CD42     | klaknkqkpiTpetaeclard  |
| IP100007311 | 53   | 45   | unsp->unsp+PKA                        |  |                                                 | 5096  | PCCB     | idaqhgkrgkITarensilid  |
| IP100007311 | 60   | 58   |                                       |  | unsp+PKC+PKG+PKA->unsp+PKG+PKA                  | 4097  | MAFG     | relnghirgSKeeeyvkqr    |
| IP100007311 | 60   | 64   | unsp+EGFR->                           |  | unsp+EGFR->EGFR                                 | 4097  | MAFG     | eiwigkrrrTlknrgyaasc   |
| IP100007311 | 71   | 74   | unsp+PKC->unsp+PKC+CKII               |  | unsp+EGFR->EGFR                                 | 4097  | MAFG     | qrrrtlknrgYaascrvkrvt  |
| IP100007311 | 76   | 74   | unsp+PKC->unsp+CKII                   |  | unsp+PKC->unsp+PKC+CKII                         | 4097  | MAFG     | yaascrvkrvtTqkeeleka   |
| IP100007334 | 359  | 350  | unsp+PKC->unsp+PKC+cdc2               |  | unsp+PKC->unsp+CKII+DNAPK                       | 22985 | ACIN1    | ftsrqearKShlarqqake    |
| IP100007334 | 359  | 363  |                                       |  | CKII->                                          | 22985 | ACIN1    | arqqqekemTtspleeere    |
| IP100007334 | 717  | 720  | PKC->                                 |  |                                                 | 22985 | ACIN1    | sqpesaekhvTqrqpgerp    |
| IP100007611 | 54   | 50   | PKC->                                 |  | PKC->unsp                                       | 539   | ATP50    | ryatalyaaSKqnkleqvek   |
| IP100007611 | 158  | 163  | PKC->PKC+cdc2                         |  | PKC->PKC+cdc2                                   | 539   | ATP50    | tselktvklSfsggqviki    |
| IP100007611 | 162  | 159  | PKC->                                 |  |                                                 | 539   | ATP50    | leatstleKTVlksfsgag    |
| IP100007611 | 162  | 163  | PKC->PKC+cdc2                         |  | PKC->PKC+cdc2                                   | 539   | ATP50    | tselktvklSfsggqviki    |
| IP100007611 | 162  | 166  |                                       |  | CKI+DNAPK->ATM+CKI+DNAPK                        | 539   | ATP50    | elktvklSfsggqviki      |
| IP100007611 | 172  | 163  | PKC->PKC+cdc2                         |  |                                                 | 539   | ATP50    | tselktvklSfsggqviki    |
| IP100007611 | 172  | 166  | CKI+DNAPK->DNAPK                      |  | CKI+DNAPK->ATM+CKI+DNAPK                        | 539   | ATP50    | elktvklSfsggqviki      |
| IP100007641 | 3    | 6    | GSK3->GSK3+cdk5                       |  | GSK3->p38MAPK                                   | 51135 | IRAK4    | -----mnkpiTptstvyrcinv |
| IP100007641 | 3    | 8    | PKG+PKA->PKC                          |  | PKG+PKA->PKA                                    | 51135 | IRAK4    | -----mnkpiTptstvyrcinv |
| IP100007641 | 34   | 43   | unsp->unsp+PKA                        |  |                                                 | 51135 | IRAK4    | klklavaikkpSgddrynqthi |
| IP100007675 | 429  | 427  | unsp+PKC->                            |  | unsp+PKC->                                      | 51143 | DYNC1L11 | vassvpiqgSkkidpnmkag   |
| IP100007694 | 6    | 7    | unsp->                                |  | unsp->                                          | 51400 | PMPE1    | ----msaleKSmhlgprsp    |
| IP100007694 | 30   | 22   | ->cdc2                                |  |                                                 | 51400 | PMPE1    | rprrpplogSggsqgskmr    |
| IP100007694 | 30   | 25   | ATM+unsp+CKI+DNAPK->ATM+CKI+DNAPK     |  | ATM+unsp+CKI+DNAPK->ATM+CKI+DNAPK               | 51400 | PMPE1    | srpplogsgSggsqgskmrmp  |
| IP100007722 | 516  | 514  | unsp+PKC->unsp+PKA                    |  | unsp+PKC->unsp+PKA                              | 271   | AMPD2    | efiktdnrvSgkyfahiike   |
| IP100007750 | 40   | 38   | PKC->                                 |  | PKC->                                           | 7277  | TUBA4A   | hgiqpdgqmpSdktiggddds  |
| IP100007750 | 40   | 41   | ->CKI                                 |  | ->unsp                                          | 7277  | TUBA4A   | qpdgmpsdKtiggdddsft    |
| IP100007750 | 163  | 158  | unsp+cdc2->unsp+PKA                   |  |                                                 | 7277  | TUBA4A   | gftsilmerTsvdygkkskie  |
| IP100007750 | 163  | 165  | unsp+PKC+PKG+CKII->unsp+PKC+CKII      |  | unsp+PKC+PKG+CKII->unsp+CKII                    | 7277  | TUBA4A   | erisvdvgkSgkSgklyvyp   |
| IP100007750 | 280  | 282  | EGFR->unsp                            |  | EGFR->unsp+EGFR                                 | 7277  | TUBA4A   | vspmdpnsgSgpyvklkip    |
| IP100007750 | 311  | 312  |                                       |  | ->INSR                                          | 7277  | TUBA4A   | mvkcdprhngYmaccllyrgd  |
| IP100007750 | 401  | 399  | unsp->                                |  |                                                 | 7277  | TUBA4A   | ardidhfdmYakravhwyv    |
| IP100007752 | 58   | 51   | SRC+INSR+EGFR->SRC+EGFR               |  | SRC+INSR+EGFR->SRC+EGFR                         | 10383 | TUBB2C   | qdlervinvYneatgkyvyp   |
| IP100007752 | 58   | 59   | unsp->                                |  | unsp->                                          | 10383 | TUBB2C   | vyneatgkyvYpravlvdle   |
| IP100007752 | 103  | 106  | unsp->                                |  |                                                 | 10383 | TUBB2C   | gagnnnwakghYtegaelvds  |
| IP100007752 | 103  | 107  | ->CKII                                |  |                                                 | 10383 | TUBB2C   | agnnnwakghYtegaelvds   |
| IP100007752 | 379  | 382  | unsp+PKA->PKA                         |  | unsp+PKA->PKA                                   | 10383 | TUBB2C   | taigelfkrSedqtafmrrk   |
| IP100007756 | 101  | 94   | PKC->PKC+cdc2                         |  |                                                 | 57403 | RAB22A   | vydtkteetlknwvkeir     |
| IP100007757 | 288  | 279  |                                       |  | unsp+PKC+PKG+cdc2+PKA+RSK->unsp+PKC+PKG+PKA+RSK | 22807 | IKZF2    | tgmnmkrksSpqgkvgekl    |
| IP100007765 | 121  | 116  | PKC->                                 |  | PKC->                                           | 3313  | HSPA9    | krqavtnpnnTfyatkrliqr  |
| IP100007765 | 121  | 118  |                                       |  | unsp+EGFR->EGFR                                 | 3313  | HSPA9    | qavtnpnnTfyatkrliqr    |
| IP100007765 | 300  | 299  | ->PKA                                 |  | ->DNAPK                                         | 3313  | HSPA9    | efkretgvdITkdnmalqrvr  |
| IP100007765 | 345  | 347  |                                       |  | PKC->                                           | 3313  | HSPA9    | sgpkhnmklTraqfeigvtd   |
| IP100007765 | 595  | 594  | unsp+PKC+CKII->unsp+CKII              |  | unsp+PKC+CKII->unsp+CKII+DNAPK                  | 3313  | HSPA9    | maegihdteTkmneerfdqjp  |
| IP100007765 | 646  | 639  | unsp+PKC->unsp+PKC+cdc2               |  |                                                 | 3313  | HSPA9    | tgenirqaaSliqasaklfe   |
| IP100007765 | 646  | 644  | unsp->                                |  |                                                 | 3313  | HSPA9    | rqaaassliqaSiklfemaykk |
| IP100007797 | 17   | 16   | ->ATM+DNAPK                           |  |                                                 | 2171  | FABP5    | qlegvrwrSdgfdeymkel    |
| IP100007797 | 55   | 53   | PKC->                                 |  | PKC->                                           | 2171  | FABP5    | clitcdgklTiktestlkt    |
| IP100007797 | 55   | 58   | unsp+PKC->PKC                         |  | unsp+PKC->PKC                                   | 2171  | FABP5    | dgknlitkteStlktqfsc    |
| IP100007797 | 55   | 59   | unsp+PKC->unsp+CKI                    |  | unsp+PKC->unsp+CKI                              | 2171  | FABP5    | gknlitkteStlktqfsc     |
| IP100007811 | 35   | 36   | PKC->PKC+p38MAPK                      |  | PKC->PKC+p38MAPK                                | 1019  | CDK4     | phshgfvalKsvrvpngggg   |
| IP100007927 | 114  | 115  | unsp->                                |  | unsp->                                          | 10592 | SMC2     | rqviggmkYlingvnannt    |
| IP100007927 | 320  | 313  | ATM+unsp+DNAPK->unsp+DNAPK            |  | ATM+unsp+DNAPK->unsp+DNAPK                      | 10592 | SMC2     | laearvntKsqsadflkkkn   |
| IP100007927 | 321  | 313  | ATM+unsp+DNAPK->unsp+DNAPK            |  |                                                 | 10592 | SMC2     | laearvntKsqsadflkkkn   |
| IP100007927 | 330  | 329  |                                       |  | ->DNAPK                                         | 10592 | SMC2     | lkknlkaceSKrkeleknm    |
| IP100007927 | 677  | 669  |                                       |  | DNAPK->ATM+DNAPK                                | 10592 | SMC2     | phgtsqgSqaasilftq      |
| IP100007927 | 677  | 676  | PKC->                                 |  | PKC->                                           | 10592 | SMC2     | garsqaasilTKfgeklvdqg  |
| IP100007927 | 1158 | 1159 |                                       |  | PKC->unsp+PKC                                   | 10592 | SMC2     | mfnanvlfkTkvdgdstva    |
| IP100007927 | 1160 | 1159 | PKC->                                 |  | PKC->                                           | 10592 | SMC2     | mfnanvlfkTkvdgdstva    |
| IP100007940 | 269  | 265  | unsp->                                |  | unsp->SRC+unsp                                  | 10613 | ERLIN1   | rekakadaeyYaahkyatsnk  |
| IP100007940 | 269  | 270  | unsp->                                |  |                                                 | 10613 | ERLIN1   | adaeyYaahYatsnkhkltp   |
| IP100007941 | 165  | 168  | unsp->                                |  | unsp->                                          | 10614 | HEXIM1   | skkhrhwkpyYkltweekkrf  |
| IP100007941 | 165  | 171  | unsp+PKC+CKII->unsp+PKC               |  | unsp+PKC+CKII->unsp+PKC                         | 10614 | HEXIM1   | krhwpykYlTweekkrfdek   |
| IP100007983 | 282  | 279  | unsp+cdc5+p38MAPK->cdc5+p38MAPK       |  | unsp+cdc5+p38MAPK->cdc5+p38MAPK                 | 64236 | PDLM2    | sslpaspaTpkphtkcekc    |
| IP100008054 | 105  | 102  | unsp+cdc2->unsp+PKA+cdc2              |  | unsp+cdc2->unsp+PKA+cdc2                        | 27154 | BRPF3    | kpsqkkskSeskhagstftq   |
| IP100008054 | 105  | 104  | unsp+PKC->PKC                         |  | unsp+PKC->ATM+unsp+DNAPK                        | 27154 | BRPF3    | sskqkksesKhagstfshl    |
| IP100008054 | 105  | 108  | PKC->                                 |  |                                                 | 27154 | BRPF3    | kkkescskhaSgtsfhlppps  |
| IP100008054 | 447  | 440  | unsp+CKI+PKC->unsp+CKI+PKC+cdc2       |  |                                                 | 27154 | BRPF3    | eqeaggvsgSikgvpkkskm   |
| IP100008054 | 447  | 451  | unsp+PKC+PKA->unsp+PKC                |  | unsp+PKC+PKA->unsp+PKC                          | 27154 | BRPF3    | lkvgvpkkskmSlkqkikkepe |
| IP100008054 | 449  | 440  | unsp+CKI+PKC->unsp+CKI+PKC+cdc2       |  |                                                 | 27154 | BRPF3    | eqeaggvsgSikgvpkkskm   |
| IP100008054 | 449  | 448  | unsp->unsp+PKA                        |  | unsp+PKC+PKA->unsp+CKI+PKC                      | 27154 | BRPF3    | sgsikgvpkkskmslqkikk   |
| IP100008054 | 449  | 451  | unsp+PKC+PKA->unsp+CKI+PKC            |  |                                                 | 27154 | BRPF3    | lkvgvpkkskmSlkqkikkepe |
| IP100008054 | 546  | 543  | unsp+CKI->CKII                        |  |                                                 | 27154 | BRPF3    | aeqrqdektSavkeelkywq   |
| IP100008054 | 546  | 551  | unsp->unsp+EGFR                       |  |                                                 | 27154 | BRPF3    | ksavkeelYwqkrlndler    |
| IP100008054 | 550  | 543  | unsp+CKII->unsp+cdc2+CKII             |  |                                                 | 27154 | BRPF3    | aeqrqdektSavkeelkywq   |
| IP100008054 | 554  | 551  |                                       |  | unsp->unsp+EGFR                                 | 27154 | BRPF3    | ksavkeelYwqkrlndler    |
| IP100008054 | 671  | 673  |                                       |  | ->unsp                                          | 27154 | BRPF3    | tncmkynadTfihraavrllr  |
| IP100008091 | 118  | 117  | PKC->ATM+PKC+DNAPK                    |  | PKC->ATM+PKC+DNAPK                              | 54617 | INO80    | kcdglnyflSkllksrwlk    |
| IP100008091 | 118  | 122  | unsp+PKC+PKG+PKA->unsp+PKC+PKG        |  | unsp+PKC+PKG+PKA->unsp+PKC+PKG+cdc2             | 54617 | INO80    | nlrnfslklkSkrlwksllls  |
| IP100008240 | 726  | 731  | unsp+PKC+PKA->PKC                     |  | unsp+PKC+PKA->                                  | 4141  | MARS     | vnepvkrngkSeadraqvgt   |
| IP100008248 | 263  | 256  |                                       |  | unsp+RSK->unsp+PKA+RSK                          | 51434 | ANAPC7   | vhtgdnrsatSicseleksl   |
| IP100008248 | 263  | 260  | PKC+DNAPK->DNAPK                      |  |                                                 | 51434 | ANAPC7   | cnrasistSieklsldrn     |
| IP100008274 | 209  | 208  | unsp+CKI+cdc2->CKI+cdc2               |  | unsp+CKI+cdc2->ATM+unsp+CKI+cdc2+DNAPK          | 10487 | CAP1     | kefhttgawSktpgvakels   |
| IP100008274 | 209  | 210  | ->PKC                                 |  | ->PKC                                           | 10487 | CAP1     | fhftglawSktpgvakelsq   |
| IP100008359 | 193  | 189  | PKC->                                 |  | PKC->                                           | 51350 | KRT76    | vkaqreqikTnnkfafsid    |
| IP100008359 | 193  | 196  | unsp+PKC->unsp                        |  |                                                 | 51350 | KRT76    | qiktlnnkfaSfidkvrfleq  |
| IP100008380 | 4    | 7    | ->CKII                                |  | ->CKII                                          | 5515  | PPP2CA   | ----mdekvtTkeldwielq   |
| IP100008433 | 47   | 52   | unsp->unsp+cdc2                       |  | unsp->unsp+cdc2                                 | 6193  | RPS5     | keyyakyphSagryaakrrf   |
| IP100008433 | 182  | 184  | PKG+PKA->                             |  | PKG+PKA->                                       | 6193  | RPS5     | adelinaaagSnsyaalkkdk  |
| IP100008433 | 182  | 187  |                                       |  | CKI+PKC+DNAPK->PKC+DNAPK                        | 6193  | RPS5     | linaaagSnsyaalkkdele   |
| IP100008454 | 43   | 45   | ->EGFR                                |  |                                                 | 51726 | DNABJ11  | sasiklikayKrlalqhp     |
| IP100008475 | 46   | 47   | unsp->                                |  |                                                 | 3157  | HMGCS1   | ekydgvdagYtiglgakmg    |
| IP100008475 | 330  | 328  | unsp+PKC->                            |  | unsp+PKC->DNAPK                                 | 3157  | HMGCS1   | afmkasselfSqktkaslv    |
| IP100008475 | 330  | 334  |                                       |  | PKA->                                           | 3157  | HMGCS1   | selfsqktkaSilvsnqngnm  |
| IP100008475 | 409  | 414  | unsp+PKG+PKA+RSK->unsp+PKA+CaM-II+RSK |  |                                                 | 3157  | HMGCS1   | slcdlksldSrtgvapdvfa   |
| IP100008524 | 104  | 96   | unsp->unsp+PKA                        |  |                                                 | 26986 | PABPC1   | wsgrdpslrgSgvgnfiknl   |
| IP100008524 | 104  | 109  | unsp->                                |  | unsp->                                          | 26986 | PABPC1   | gnfiknlkSidnkalydfr    |
| IP100008524 | 259  | 262  | unsp->                                |  | unsp->                                          | 26986 | PABPC1   | ngkelngkqYvgraqkvdr    |
| IP100008528 | 54   | 56   | unsp->                                |  | PKC->                                           | 4509  | ATP8     | nyrnkpwepkTklshlpp     |
| IP100008528 | 54   | 60   | ->PKA                                 |  |                                                 | 4509  | ATP8     | zwpwepkKicShlslpp      |
| IP100008529 | 21   | 19   | unsp+PKC->unsp                        |  | unsp+PKC->unsp                                  | 6181  | RPLP2    | laalgnssppSakdikilds   |
| IP100008529 | 24   | 19   | unsp+PKC->unsp                        |  |                                                 | 6181  | RPLP2    | laalgnssppSakdikilds   |
| IP100008529 | 24   | 29   | PKA->                                 |  | PKA->                                           | 6181  | RPLP2    | sakdikildSvgeaddrlr    |
| IP100008529 | 49   | 44   | unsp->                                |  | unsp->                                          | 6181  | RPLP2    | addrdinkviSelngniedv   |
| IP100008531 | 418  | 413  | PKC->                                 |  | PKC->                                           | 23186 | RCOR1    | qaisdvgnKsvvgkvnnfvn   |
| IP100008552 | 92   | 83   | ->cdc2                                |  |                                                 | 10539 | GLRX3    | vpevseyeiSvptfflffkn   |
| IP100008552 | 92   | 87   | PKC->                                 |  |                                                 | 10539 | GLRX3    | sekyeissvYtfflfnksqki  |
| IP100008575 | 175  | 183  | unsp+PKC->unsp+PKC+cdc2               |  |                                                 | 10657 | KHDRBS1  | vgklilpogpTikrlqetpa   |
| IP100008599 | 221  | 217  | unsp+PKC->unsp                        |  | unsp+PKC->PKC                                   | 10682 | EBP      | avkhltbagTIdakataks    |
| IP100008599 | 221  | 223  | unsp+PKC->unsp                        |  | PKC->unsp+PKC                                   | 10682 | EBP      | haqstdakaTkakskn----   |
| IP100008603 | 63   | 54   | unsp->unsp+cdc2                       |  |                                                 | 59    | ACTA2    | gvnmvgmqkdSvyydeagskr  |
| IP100008603 | 63   | 62   | unsp+PKC+cdc2->unsp+CKI+cdc2          |  | unsp+PKC+cdc2->ATM+unsp+cdc2+DNAPK              | 59    | ACTA2    | kdsyvgdeagSkrglittkyp  |
| IP100008603 | 328  | 325  | unsp+PKC+cdc2->cdc2                   |  | unsp+PKC+cdc2->unsp+cdc2                        | 59    | ACTA2    | mqkeitalapStmkiiaapp   |
| IP100008603 | 328  | 326  | PKC->                                 |  | PKC->                                           | 59    | ACTA2    | qkeitalapStmkiiaapp    |
| IP100008708 | 461  | 464  | PKC->                                 |  |                                                 | 26156 | RS1D1    | tpkpkpeakfTtpsk        |

Table S3

|             |      |      |                                        |                                        |                            |       |         |                        |
|-------------|------|------|----------------------------------------|----------------------------------------|----------------------------|-------|---------|------------------------|
| IP100008708 | 468  | 465  | unsp+cdk5->unsp+p38MAPK                | unsp+cdk5->unsp                        | iprot[PHOSphoELM]PhosphoSi | 26156 | RSLD1   | pkkpeakfft5tpsksvrkash |
| IP100008708 | 468  | 467  | PKC+cdc2->PKC+cdc2+DNAPK               | PKC+cdc2->PKC+cdc2+DNAPK               | Uniprot[PhosphoSite        | 26156 | RSLD1   | kpeakfft5tpsksvrkash   |
| IP100008708 | 468  | 474  | unsp+PKC+PKG+RSK->unsp+PKC+PKG+PKA+RSK |                                        |                            | 26156 | RSLD1   | tpsksvrkashStptkpkwppk |
| IP100008728 | 178  | 179  | INSR+unsp->unsp                        | INSR+unsp->unsp                        |                            | 10845 | CLPX    | pkkiymldkYvvgqsfakv    |
| IP100008934 | 83   | 76   | INSR+unsp->unsp                        | unsp->                                 |                            | 3158  | HMGC52  | qyvdqdzekInnvesgkyv    |
| IP100008934 | 83   | 84   | unsp->                                 | unsp->                                 |                            | 3158  | HMGC52  | ekymnvesgYVvgjgtrmg    |
| IP100008934 | 437  | 440  | ->cdc2                                 | ->cdc2                                 |                            | 3158  | HMGC52  | agpspdklv5Stsdplkrla   |
| IP100008934 | 437  | 442  |                                        | ->cdc2                                 |                            | 3158  | HMGC52  | gspdklvssTsdplkrlasr   |
| IP100008965 | 268  | 267  | unsp+PKC+cdc2->PKC+cdc2                | unsp+PKC+cdc2->unsp+PKC+cdc2+DNAPK     |                            | 3725  | JUN     | rkrmnriaaSkcrkrklr     |
| IP100008965 | 271  | 267  | unsp+PKC+cdc2->unsp+PKC                |                                        |                            | 3725  | JUN     | rkrmnriaaSkcrkrklr     |
| IP100009032 | 116  | 112  | PKC->PKA                               | PKC->unsp+PKA                          |                            | 6741  | SSB     | deykdvknrSvyikgftda    |
| IP100009032 | 116  | 114  | EGFR->                                 |                                        |                            | 6741  | SSB     | ykndvknrsYikgftdat     |
| IP100009032 | 328  | 331  | unsp+PKC->PKC                          | unsp+PKC->PKC                          |                            | 6741  | SSB     | dqgeslnkwSKgrffkgkgk   |
| IP100009032 | 360  | 362  |                                        | PKC->                                  | iprot[PHOSphoELM]PhosphoSi | 6741  | SSB     | kgvqfagkkTfsejddhdh    |
| IP100009104 | 417  | 410  | PKC->PKC+cdc2                          |                                        |                            | 10856 | RUVBL2  | ryaigltasSvcrkrkate    |
| IP100009104 | 417  | 419  | unsp+PKC+PKG+PKA+RSK->unsp+PKG         | unsp+PKG+PKG+PKA+RSK->unsp+PKG         |                            | 10856 | RUVBL2  | aslvcrkrkgTevovdkivr   |
| IP100009236 | 5    | 2    | PKC->PKA                               | PKC->                                  |                            | 857   | CAV1    | -----mSggykyvdsgeh     |
| IP100009236 | 5    | 9    | PKA->                                  | PKA->                                  |                            | 857   | CAV1    | --msgkyvdsSeghytvpjr   |
| IP100009247 | 31   | 34   | INSR+unsp+EGFR->                       | INSR+unsp+EGFR->SRC+unsp               |                            | 9556  | C14orf2 | knwipmkpyYtkvqvqeiwg   |
| IP100009286 | 636  | 633  | cdc2->                                 | cdc2->                                 |                            | 4297  | MLL     | khserpqyfsSakyaqegll   |
| IP100009286 | 636  | 634  | PKC->cdc2                              | PKC->cdc2                              |                            | 4297  | MLL     | hsrsepqyfsSakyaqegllr  |
| IP100009286 | 1133 | 1136 | PKC->                                  |                                        |                            | 4297  | MLL     | appkpkpvmTmkapeppv     |
| IP100009286 | 1235 | 1231 | cdc2->                                 |                                        |                            | 4297  | MLL     | ktsekdkdsSvknrvdss     |
| IP100009286 | 1235 | 1232 | unsp+PKC->unsp                         | unsp+PKC->unsp                         |                            | 4297  | MLL     | tsekdkdsSvknrvdssq     |
| IP100009286 | 1235 | 1240 | unsp->                                 | unsp->cdc2                             |                            | 4297  | MLL     | essvknrvdSsqkptpsare   |
| IP100009305 | 64   | 62   | unsp+PKC->PKC                          | unsp+PKC->PKC                          |                            | 10007 | GNPDA1  | lieyvkngdlSFkyvktfmd   |
| IP100009328 | 60   | 62   | unsp+PKG->                             | unsp+PKG->unsp                         |                            | 9775  | E1F4A3  | giyayfekpSaiqraikqj    |
| IP100009328 | 296  | 294  | unsp+PKC->CKII                         | unsp+PKC->                             |                            | 9775  | E1F4A3  | ctnkrcvdmTektmreantv   |
| IP100009328 | 321  | 328  | ->PKA                                  | ->PKA                                  |                            | 9775  | E1F4A3  | simkefrsgaSrvlstidwa   |
| IP100009373 | 69   | 64   | unsp+EGFR->unsp                        | unsp+EGFR->unsp                        |                            | 64769 | MEAF6   | ynniurgwdrYtnqknssnk   |
| IP100009373 | 69   | 66   | PKC+RSK->                              | PKC+RSK->PKC                           |                            | 64769 | MEAF6   | niirgwdryTtnqknssnk    |
| IP100009373 | 69   | 71   | unsp+cdc2->unsp+PKC+cdc2               |                                        |                            | 64769 | MEAF6   | wdrytnqknSnskndmrnk    |
| IP100009373 | 74   | 71   | unsp+cdc2->unsp+PKA+cdc2               |                                        |                            | 64769 | MEAF6   | wdrytnqknSnskndmrnk    |
| IP100009373 | 74   | 73   | unsp->unsp+DNAPK                       | unsp->unsp+DNAPK                       |                            | 64769 | MEAF6   | rylnqknSnskndmrnkfk    |
| IP100009373 | 91   | 90   | unsp+PKC+PKA+RSK->unsp+PKA+RSK         | unsp+PKC+PKA+RSK->unsp+PKA+DNAPK+RSK   |                            | 64769 | MEAF6   | rkfkearlfSKssvtaaaav   |
| IP100009373 | 91   | 92   | ->cdc2                                 |                                        |                            | 64769 | MEAF6   | fkearlfSkSvtsaaavsa    |
| IP100009373 | 91   | 93   | cdc2->PKC+cdc2                         |                                        |                            | 64769 | MEAF6   | kearlfSkSvtsaaavsal    |
| IP100009373 | 91   | 95   | PKC->                                  |                                        |                            | 64769 | MEAF6   | aerlfSkSvTsaavsalag    |
| IP100009439 | 237  | 236  | unsp+CKI->unsp+CKI+PKA                 | unsp+CKI->ATM+unsp+CKI+DNAPK           |                            | 6857  | SYT1    | vmayvdfdrSKhdidgefkw   |
| IP100009448 | 81   | 76   | PKC->                                  | PKC->                                  |                            | 7128  | TNFAIP3 | kaiddmTlesqkknwnc      |
| IP100009448 | 81   | 79   | PKC->                                  | PKC->DNAPK                             |                            | 7128  | TNFAIP3 | idmriagteSgkknwncv     |
| IP100009634 | 135  | 137  | unsp->                                 |                                        |                            | 58472 | SQRDL   | chttdddekSYryliialgi   |
| IP100009634 | 135  | 138  | INSR->                                 | INSR->                                 |                            | 58472 | SQRDL   | ihthdddekSYryliialgi   |
| IP100009634 | 173  | 168  | PKC+DNAPK->PKA+DNAPK                   | PKC+DNAPK->PKC+PKA+DNAPK               |                            | 58472 | SQRDL   | pegfahpkigSnysvktvekt  |
| IP100009634 | 173  | 171  | unsp->                                 | unsp->                                 |                            | 58472 | SQRDL   | fahpkigsnySvktvektwka  |
| IP100009634 | 180  | 178  | unsp+PKC->                             | unsp+PKC->                             |                            | 58472 | SQRDL   | snysvktvekTkwalgdfkeg  |
| IP100009688 | 89   | 86   | PKC->                                  | PKC->                                  |                            | 5305  | PIP4K2A | nhlfknemppShfkkeycpm   |
| IP100009688 | 91   | 86   | PKC->                                  | PKC->                                  |                            | 5305  | PIP4K2A | nhlfknemppShfkkeycpm   |
| IP100009688 | 145  | 138  | INSR->                                 | INSR->                                 |                            | 5305  | PIP4K2A | arsgarfhkYtkrklr       |
| IP100009688 | 145  | 142  | unsp->unsp+EGFR                        | unsp->EGFR                             |                            | 5305  | PIP4K2A | arfhstydYrYiklttsedv   |
| IP100009688 | 145  | 146  |                                        | ->unsp                                 |                            | 5305  | PIP4K2A | tsydkryiikTtsedvaemh   |
| IP100009688 | 145  | 148  | unsp->                                 | unsp->unsp+CKII                        |                            | 5305  | PIP4K2A | ydryiikTtsedvaemhni    |
| IP100009688 | 145  | 149  | unsp+CKII->CKII                        | unsp+CKII->unsp+cdc2+CKII              |                            | 5305  | PIP4K2A | dkryiikTtsedvaemhni    |
| IP100009713 | 61   | 52   |                                        | cdc2->                                 |                            | 6662  | SOX9    | dtentrpqenTfpgkepdlkk  |
| IP100009713 | 398  | 395  | PKC+cdc2->cdc2                         | PKC+cdc2->cdc2                         |                            | 6662  | SOX9    | lssepqqsqrThikteqlsp   |
| IP100009713 | 398  | 405  | unsp->unsp+cdc2                        |                                        |                            | 6662  | SOX9    | thikteqlspShyseqqhsp   |
| IP100009724 | 172  | 176  | PKC->                                  | PKC->                                  |                            | 64800 | EFCAB6  | vgekvfknnTvmkafelidv   |
| IP100009724 | 175  | 176  |                                        | PKC->unsp+PKC                          |                            | 64800 | EFCAB6  | vgekvfknnTvmkafelidv   |
| IP100009724 | 179  | 176  | PKC->                                  |                                        |                            | 64800 | EFCAB6  | vgekvfknnTvmkafelidv   |
| IP100009724 | 188  | 189  |                                        | ->PKC                                  |                            | 64800 | EFCAB6  | kafelidvknTglvrpqelr   |
| IP100009771 | 81   | 79   | unsp+CKII->cdc2+CKII                   | unsp+CKII->CKII                        |                            | 84823 | LMBN2   | lendrllikSekeevtrre    |
| IP100009771 | 520  | 518  |                                        | ->p38MAPK                              |                            | 84823 | LMBN2   | legeeiaykTpykilraggm   |
| IP100009790 | 395  | 393  | PKC->                                  | PKC->                                  |                            | 5214  | PKP     | rgsrfgaglnTykraikljd   |
| IP100009790 | 688  | 687  | PKC->                                  | PKC->                                  |                            | 5214  | PKP     | apspfdrnftgTkisaramewi |
| IP100009790 | 688  | 690  |                                        | PKC->                                  |                            | 5214  | PKP     | pfdrmtgTkisaramewitak  |
| IP100009844 | 291  | 288  | unsp->unsp+PKA                         | unsp->unsp+PKA                         |                            | 51292 | GMPR2   | yagvgyeeraSegktvevpfk  |
| IP100009844 | 291  | 292  |                                        | ->unsp                                 |                            | 51292 | GMPR2   | vaeryasegktvevpfkgedv  |
| IP100009867 | 178  | 174  | PKC->                                  | PKC->                                  |                            | 3852  | KRT5    | vtteareqikTlnnkafsfid  |
| IP100009867 | 178  | 181  | unsp+PKC->unsp                         |                                        |                            | 3852  | KRT5    | qiktlnnkfaSfidkvrfleq  |
| IP100009889 | 26   | 27   | unsp->                                 | unsp->                                 |                            | 6303  | SAT1    | ilrilkelakYyemeqvilt   |
| IP100009889 | 26   | 29   | unsp+EGFR->                            | unsp+EGFR->                            |                            | 6303  | SAT1    | rilkelakeYyemeqvilt    |
| IP100009895 | 121  | 117  | DNAPK->PKA+DNAPK                       | DNAPK->PKA+DNAPK                       |                            | 51304 | ZDHHC3  | kgnatkefeSlqlkpggvvy   |
| IP100009904 | 256  | 250  | unsp->unsp+PKA                         | unsp->unsp+PKA                         |                            | 9601  | PD1A4   | etdlakrfdvSgpytkifkr   |
| IP100009904 | 256  | 252  |                                        | ->EGFR                                 |                            | 9601  | PD1A4   | diakrfdvSgpytkifkr     |
| IP100009904 | 256  | 254  | unsp+PKC->                             | unsp+PKC->                             |                            | 9601  | PD1A4   | idrfdvSgpytkifkr       |
| IP100009904 | 366  | 365  | unsp->unsp+PKA                         | unsp->ATM+unsp+DNAPK                   |                            | 9601  | PD1A4   | lvrmqgpektSKyepshmd    |
| IP100009904 | 484  | 482  | unsp+PKC->                             | unsp+PKC->                             |                            | 9601  | PD1A4   | edvnaaldeSgkfkameepe   |
| IP100009931 | 15   | 11   | unsp+PKC->unsp+PKA                     | unsp+PKC->unsp+PKA                     |                            | 81932 | HDHD3   | mahrilqirITvdvkdtilr   |
| IP100009943 | 93   | 98   | unsp+PKC->PKC                          | unsp+PKC->PKC                          |                            | 7178  | TP1     | ykkyidykmSikgkleeqr    |
| IP100009943 | 97   | 98   | unsp+PKC->PKC                          | unsp+PKC->PKC                          |                            | 7178  | TP1     | ykkyidykmSikgkleeqr    |
| IP100009958 | 47   | 46   |                                        | ->DNAPK                                |                            | 10987 | COP55   | qqellaakpTKdhhyfyck    |
| IP100009958 | 326  | 320  |                                        | ATM+DNAPK->ATM+cdc2+DNAPK              |                            | 10987 | COP55   | ttieahglmSqvdkidlfng   |
| IP100009960 | 222  | 219  | PKC+DNAPK->PKA+DNAPK                   | PKC+DNAPK->PKA+DNAPK                   |                            | 10989 | IMMT    | kekqeqviekSlaksledair  |
| IP100009960 | 222  | 223  | unsp->unsp+CKI                         |                                        |                            | 10989 | IMMT    | eqviekviekSlaksledair  |
| IP100009960 | 222  | 231  | unsp+PKA->unsp+cdc2+PKA                |                                        |                            | 10989 | IMMT    | akledalrqTysvtaqiaia   |
| IP100009960 | 451  | 447  | ->PKA                                  | unsp+PKA->unsp+cdc2+PKA                |                            | 10989 | IMMT    | qkleeatrfdSavakalehr   |
| IP100009960 | 506  | 507  | unsp+CKII->unsp+cdc2+CKII              | unsp+CKII->unsp+cdc2+CKII              |                            | 10989 | IMMT    | vlrvqeqelSefeqnlsekl   |
| IP100009992 | 272  | 267  | PKC->                                  | PKC->                                  |                            | 11033 | ADAP1   | gymektgpkTegfrkrvftm   |
| IP100010085 | 250  | 243  | ATM+unsp+DNAPK->unsp+DNAPK             | ATM+unsp+DNAPK->unsp+DNAPK             |                            | 5326  | PLAGL2  | hltrhvkskSgellkiikpt   |
| IP100010085 | 269  | 265  | PKC+cdc2->cdc2                         |                                        |                            | 5326  | PLAGL2  | dmlgllscsTvsvkeelspv   |
| IP100010085 | 269  | 267  | unsp+PKC+CKII->unsp+CKII               | unsp+PKC+CKII->unsp+CKII               |                            | 5326  | PLAGL2  | lgliscsstvSvkeelspvc   |
| IP100010085 | 356  | 347  | ->cdc2                                 |                                        |                            | 5326  | PLAGL2  | qlppkyqlgtsYslpdklpkv  |
| IP100010090 | 263  | 262  |                                        | PKC->ATM+DNAPK                         |                            | 2730  | GCLM    | vvksrkiikSkylqaklr     |
| IP100010090 | 263  | 265  |                                        | ->EGFR                                 |                            | 2730  | GCLM    | ksrkiiksgYlqakrsgs     |
| IP100010157 | 81   | 79   | EGFR->                                 | EGFR->unsp+EGFR                        |                            | 4144  | MAT2A   | geitsraavdYqkvrvavkh   |
| IP100010158 | 102  | 101  |                                        | PKC+PKA->ATM+PKC+PKA+DNAPK             |                            | 54108 | CHRA1   | adilpkilaSkylmkleek    |
| IP100010188 | 90   | 89   | unsp+PKC->PKC                          | unsp+PKC->ATM+PKC                      |                            | 57380 | MRS2    | lasvapvftvTkfdkqgnvts  |
| IP100010188 | 93   | 89   | unsp+PKC->unsp                         | unsp+PKC->PKC                          |                            | 57380 | MRS2    | lasvapvftvTkfdkqgnvts  |
| IP100010188 | 93   | 98   | PKC+CKII->CKII                         | PKC+CKII->CKII                         |                            | 57380 | MRS2    | vtkfdkqgnvTsferkittely |
| IP100010188 | 93   | 99   | PKC->CKI+PKC                           | PKC->CKI+PKC                           |                            | 57380 | MRS2    | vtkfdkqgnvTsferkittely |
| IP100010190 | 291  | 287  | PKC->                                  | PKC->                                  |                            | 26063 | DEC2    | ngvkglpdfrSfakl----    |
| IP100010190 | 291  | 289  | PKC->                                  | PKC->                                  |                            | 26063 | DEC2    | vkglpdrfSfakl          |
| IP100010196 | 158  | 150  | ATM+DNAPK->cdc2+DNAPK                  |                                        |                            | 8204  | NR1P1   | fsrlqvalSaqirgskqeq    |
| IP100010196 | 158  | 156  | unsp+PKC+PKG+PKA->unsp+PKG+PKA         | unsp+PKC+PKG+PKA->unsp+PKA             |                            | 8204  | NR1P1   | tvslsqgirqSikeeqyalsh  |
| IP100010196 | 158  | 162  | unsp->                                 |                                        |                            | 8204  | NR1P1   | qirgskqeqYalshdskve    |
| IP100010196 | 286  | 279  | INSR->                                 | INSR->                                 |                            | 8204  | NR1P1   | llseahllqYsrehalktqn   |
| IP100010196 | 310  | 314  | PKC+cdc2->cdc2                         |                                        |                            | 8204  | NR1P1   | lqngqkdvgSyalpkmsssh   |
| IP100010196 | 446  | 444  | PKC->                                  | PKC->                                  |                            | 8204  | NR1P1   | sysncvpdlScchrtekes    |
| IP100010196 | 446  | 449  | unsp+PKC->                             |                                        |                            | 8204  | NR1P1   | vpdlscchrTeksessedqvs  |
| IP100010196 | 481  | 487  | ->cdc2                                 | ->cdc2                                 |                            | 8204  | NR1P1   | dvdkledvTkdilrleked    |
| IP100010196 | 528  | 527  | ->PKA                                  | ->ATM+DNAPK                            |                            | 8204  | NR1P1   | tspgghvndvSKfntayart   |
| IP100010196 | 606  | 603  | unsp+PKC->                             | unsp+PKC->PKC                          |                            | 8204  | NR1P1   | ntashnsmdITkskdppegkp  |
| IP100010196 | 606  | 605  | PKC->                                  | PKC->ATM+DNAPK                         |                            | 8204  | NR1P1   | asnhsmldtkskdppegkpq   |
| IP100010196 | 931  | 925  | unsp->unsp+CKII                        |                                        |                            | 8204  | NR1P1   | hgsasesehrSwareksfnnv  |
| IP100010196 | 931  | 930  | unsp+PKC+cdc2+PKA->unsp+cdc2+PKA+DNAPK | unsp+PKC+cdc2+PKA->unsp+cdc2+PKA+DNAPK |                            | 8204  | NR1P1   | esehswaresKsfnnvklq    |
| IP100010204 | 23   | 24   |                                        | CKII->unsp+CKII                        |                            | 6428  | SFRS3   | vgnlgnngnkTelerafgyg   |
| IP100010214 | 27   | 32   | INSR->                                 |                                        |                            | 57402 | S100A14 | ietliknfhqYsvegkettip  |
| IP100010214 | 27   | 33   | unsp+CKI->unsp+CKI+cdc2                |                                        |                            | 57402 | S100A14 | etliknfhqYsvegkettip   |
| IP100010252 | 252  | 251  | PKG->                                  | PKG->                                  |                            | 51592 | TRIM33  | cieahrvkTkdilrleked    |
| IP100010252 | 763  | 764  |                                        | PKC->unsp+PKC                          |                            | 51592 | TRIM33  | cgssgrtaektSlfskdsqkv  |
| IP100010252 | 763  | 765  | unsp+cdc2->cdc2                        |                                        |                            | 51592 | TRIM33  | gssgrtaektSlfskdsqkv   |
| IP100010252 | 763  | 767  |                                        | unsp+PKC->unsp+PKC+cdc2                |                            | 51592 | TRIM33  | sgsrtaektSlfskdsqkvkq  |
| IP100010252 | 769  | 760  | ->cdc2                                 |                                        |                            | 51592 | TRIM33  | srsgcgssgrTaektslfsks  |
| IP100010252 | 769  | 764  | PKC->                                  | PKC->                                  |                            | 51592 | TRIM33  | cgssgrtaektSlfskdsqkv  |
| IP100010252 | 769  | 765  | unsp+cdc2->unsp+PKA                    |                                        |                            | 51592 | TRIM33  | gssgrtaektSlfskdsqkv   |
| IP100010252 | 769  |      |                                        |                                        |                            |       |         |                        |

Table S3

|             |      |      |                                               |                                           |                             |        |          |                         |
|-------------|------|------|-----------------------------------------------|-------------------------------------------|-----------------------------|--------|----------|-------------------------|
| IP100010320 | 41   | 46   |                                               | unsp->unsp+CKII                           |                             | 10951  | CBX1     | veyllkwkgfSdedntwepee   |
| IP100010320 | 84   | 89   | unsp+PKA+CKII->unsp+CKII                      | unsp+PKA+CKII->unsp+CKII                  | iiprot[PHOsphoELM]PhosphoSi | 10951  | CBX1     | kseggkrakdSsdedtgeesk   |
| IP100010320 | 139  | 141  | unsp+PKA->unsp+CKII                           | unsp+PKA->unsp+CKII                       |                             | 10951  | CBX1     | elmfmkwnkSdeadvdpake    |
| IP100010349 | 102  | 102  | unsp->unsp+EGFR                               | unsp->unsp+EGFR                           |                             | 8540   | AGPS     | qevmkiwngwTndskfnnk     |
| IP100010349 | 102  | 101  | -->ATM+DNAPK                                  | -->ATM+DNAPK                              |                             | 8540   | AGPS     | nmwngvgyndSkfnnkqgi     |
| IP100010349 | 169  | 171  |                                               |                                           |                             | 8540   | AGPS     | nedfihdktetnSsysseadd   |
| IP100010349 | 169  | 174  | unsp+PKA->cdc2                                | unsp+PKA->cdc2                            |                             | 8540   | AGPS     | fhldketniSysseaddrvf    |
| IP100010404 | 17   | 9    | ATM+unsp+CKII+DNAPK->ATM+unsp+cdc2+CKII+DNAPK |                                           | Uniprot[PhosphoSite         | 83443  | SF3B5    | --mtdrtythSghlasky      |
| IP100010404 | 17   | 16   | -->PKA                                        | -->ATM+DNAPK                              |                             | 83443  | SF3B5    | thshqlehiqSkylgtghadt   |
| IP100010414 | 22   | 31   | -->cdc2                                       | -->cdc2                                   |                             | 9124   | PLD1M1   | gkdfeqplaiSrvtpgskaal   |
| IP100010415 | 168  | 166  | unsp+PKC->PKA                                 | unsp+PKC->PKA                             |                             | 11332  | ACOT7    | nkatlwyvplSlknvdklev    |
| IP100010415 | 198  | 194  |                                               | -->EGFR                                   |                             | 11332  | ACOT7    | qeoeeggrkYeaqklmermet   |
| IP100010420 | 104  | 107  | INSR+unsp->unsp                               | INSR+unsp->unsp                           |                             | 83447  | SLC25A31 | qalnfnakdkYkqlfmsgvnk   |
| IP100010471 | 76   | 70   | unsp+PKG+PKA+CKII->unsp+PKG+cdc2+PKA+CKII     | unsp+PKG+PKA+CKII->unsp+PKG+cdc2+PKA+CKII |                             | 3936   | LCP1     | tgddidagpSldetfihqg     |
| IP100010471 | 88   | 83   | unsp+PKC->PKC                                 | unsp+PKC->PKC                             |                             | 3936   | LCP1     | efikfihgikStdvaktfrka   |
| IP100010471 | 88   | 84   | PKC->                                         | PKC->                                     |                             | 3936   | LCP1     | kifikfhgksTdvaktfrka    |
| IP100010471 | 294  | 290  | -->PKA                                        | -->PKA                                    |                             | 3936   | LCP1     | nagcnkignfStdidkskayy   |
| IP100010471 | 294  | 291  | -->CKII                                       | -->CKII                                   |                             | 3936   | LCP1     | agcnkignfStdidkskayy    |
| IP100010471 | 294  | 296  | PKC+PKA->PKC                                  | PKC+PKA->                                 |                             | 3936   | LCP1     | ignfstidkdSkayyhleqv    |
| IP100010471 | 297  | 296  | PKC+PKA->PKA                                  | PKC+PKA->PKA+DNAPK                        |                             | 3936   | LCP1     | ignfstidkdSkayyhleqv    |
| IP100010471 | 468  | 474  | -->cdc2                                       | -->cdc2                                   |                             | 3936   | LCP1     | velgknaqkTSlvagiggdln   |
| IP100010471 | 472  | 474  | -->PKC                                        | -->CKI                                    |                             | 3936   | LCP1     | velgknaqkTSlvagiggdln   |
| IP100010471 | 542  | 519  | unsp+PKC+cdc2->unsp+cdc2                      | unsp+PKC+cdc2->unsp+cdc2                  |                             | 3936   | LCP1     | elreakesSisfsfdpkiokis  |
| IP100010471 | 542  | 539  | unsp+PKC->unsp                                | unsp+PKC->unsp+CKI                        |                             | 3936   | LCP1     | ireakesSisfsfdpkiokis   |
| IP100010471 | 542  | 540  | unsp+PKC->unsp+PKC+cdc2                       |                                           |                             | 3936   | LCP1     | reakesSisfsfdpkiokis    |
| IP100010471 | 542  | 547  | unsp+PKA->PKA                                 | unsp+PKA->PKA                             |                             | 3936   | LCP1     | sissfdkpiTSslpdlvidl    |
| IP100010471 | 579  | 588  | PKC->PKC+cdc2                                 | PKC->PKC+cdc2                             |                             | 3936   | LCP1     | eklnnkayaiSmargkarvry   |
| IP100010700 | 27   | 25   | unsp+PKC->                                    | unsp+PKC->                                |                             | 7916   | BAT2     | kkysslnlfdTygkgleiqk    |
| IP100010700 | 29   | 25   | unsp+PKC->unsp                                |                                           |                             | 7916   | BAT2     | kkysslnlfdTygkgleiqk    |
| IP100010700 | 1196 | 1191 | PKC->                                         | PKC->                                     |                             | 7916   | BAT2     | vcpgwsspakSlapkkpptgp   |
| IP100010700 | 1196 | 1199 | -->GSK3                                       |                                           |                             | 7916   | BAT2     | alslapkpppTgppppskppl   |
| IP100010706 | 186  | 181  | PKC->                                         |                                           |                             | 2937   | GSS      | sktkeagkSlennpskglag    |
| IP100010706 | 186  | 185  | -->PKA                                        | -->DNAPK                                  |                             | 2937   | GSS      | eaqklsnnpSkglaglaaka    |
| IP100010720 | 399  | 401  | unsp+PKA->unsp                                | unsp+PKA->unsp                            |                             | 22948  | CTT5     | nkmiieakarSHaldalcvrn   |
| IP100010740 | 421  | 420  |                                               | -->DNAPK                                  |                             | 6421   | SFPQ     | stgkgivefaSkpaarkafer   |
| IP100010740 | 472  | 470  | unsp->                                        |                                           |                             | 6421   | SFPQ     | peklaqknpmYkoretprpf    |
| IP100010740 | 472  | 476  | unsp+unsp+cdc5                                | unsp->unsp+cdc5+p38MAPK                   |                             | 6421   | SFPQ     | knpmYkoretprpfraqhgt    |
| IP100010796 | 103  | 99   |                                               | -->EGFR                                   |                             | 5034   | P4HB     | daqqyvgvrgYptikfrngd    |
| IP100010796 | 103  | 101  | unsp+PKC->                                    | unsp+PKC->                                |                             | 5034   | P4HB     | laqqyvgvrgYptikfrngd    |
| IP100010796 | 444  | 439  | -->PKA                                        |                                           |                             | 5034   | P4HB     | aneveavkvhTSftrngdta    |
| IP100010796 | 444  | 449  | unsp->                                        |                                           |                             | 5034   | P4HB     | sfklkfpasSadrvidyng     |
| IP100010833 | 607  | 606  | -->PKA                                        |                                           |                             | 7707   | ZNFI48   | sdkanmlqeySKlqqaldrt    |
| IP100010847 | 122  | 124  | unsp->                                        | unsp->                                    |                             | 1411   | CRYBA1   | rpicasnhkeSkmtfekenf    |
| IP100010847 | 125  | 124  | unsp->                                        | unsp->ATM+unsp+DNAPK                      |                             | 1411   | CRYBA1   | rpicasnhkeSkmtfekenf    |
| IP100010863 | 57   | 61   | PKC+PKA->PKA                                  |                                           |                             | 475    | ATOX1    | llatikktgkTsvyslgle---  |
| IP100010863 | 60   | 58   | PKC->                                         | PKC->                                     |                             | 475    | ATOX1    | mdtilatikTgktsvyslgle   |
| IP100010863 | 60   | 63   | unsp->                                        | unsp->                                    |                             | 475    | ATOX1    | atlikktgkTsvyslgle----  |
| IP100010872 | 149  | 147  | unsp+PKG->PKG                                 | unsp+PKG->PKG                             |                             | 8535   | CBX4     | ragkppppgSkgykyyqjnsk   |
| IP100010896 | 13   | 16   | unsp+PKC+cdc2->cdc2                           | unsp+PKC+cdc2->PKG+cdc2                   |                             | 1192   | CLIC1    | pqvevkvhTSftrngdta      |
| IP100010896 | 49   | 54   | unsp+PKC+RSK->unsp+PKC+CaM-II+RSK             | unsp+PKC+RSK->unsp+RSK                    |                             | 1192   | CLIC1    | tdgldkrtteTSvskigpggl   |
| IP100010896 | 119  | 115  | PKG->PKG+PKA                                  |                                           |                             | 1192   | CLIC1    | tagldifaktSaiyknspal    |
| IP100010896 | 119  | 117  |                                               | -->unsp                                   |                             | 1192   | CLIC1    | glidifaktsaYiksnpalnd   |
| IP100011051 | 236  | 241  | PKG->                                         |                                           |                             | 3195   | TLX1     | raalakalmTdaqvktwfqn    |
| IP100011062 | 55   | 54   |                                               | -->DNAPK                                  |                             | 1373   | CP51     | qtahivledgTkmkgyfghp    |
| IP100011062 | 119  | 110  | -->cdc2                                       |                                           |                             | 1373   | CP51     | iignggapdtTaldeglisky   |
| IP100011062 | 119  | 118  | CKII->PKA                                     | CKII->ATM+CKII+DNAPK                      |                             | 1373   | CP51     | dttdaldelglSkylesngikv  |
| IP100011062 | 119  | 123  | PKC->                                         |                                           |                             | 1373   | CP51     | delglSkylesngikvsglilv  |
| IP100011062 | 841  | 847  | unsp->unsp+cdc2                               | unsp->unsp+cdc2                           |                             | 1373   | CP51     | ndrleakesSisfsfdpkiokis |
| IP100011062 | 892  | 890  | unsp->                                        | unsp->                                    |                             | 1373   | CP51     | kmrdlnmekTKlglnseamt    |
| IP100011062 | 892  | 896  | unsp+CKII->CKI+CKII                           | unsp+CKII->unsp+CKI+CKII                  |                             | 1373   | CP51     | nmektikglnSesmtteetkr   |
| IP100011069 | 5    | 9    | PKC+cdc2->cdc2                                |                                           |                             | 7374   | UNG      | --migqtktySffspsparker  |
| IP100011069 | 295  | 294  |                                               | unsp+PKA->unsp+PKA+DNAPK                  |                             | 7374   | UNG      | yrffgchrhSktnellaksg    |
| IP100011107 | 80   | 81   | unsp->                                        | unsp->                                    |                             | 3418   | IDH2     | ilphvdiqlkYfdglpnrdq    |
| IP100011107 | 133  | 134  | unsp+unsp+p38MAPK                             | unsp->                                    |                             | 3418   | IDH2     | eefkdkmwmkSpngtimilg    |
| IP100011107 | 133  | 138  | PKC->                                         |                                           |                             | 3418   | IDH2     | lkkmwkspongTlrimlgtvtf  |
| IP100011107 | 155  | 146  | PKC->PKC+cdc2                                 |                                           |                             | 3418   | IDH2     | ngtrmilgTVfresvdkn      |
| IP100011107 | 180  | 179  | INSR+unsp->unsp                               |                                           |                             | 3418   | IDH2     | tsghahgdqYkatdfvadra    |
| IP100011107 | 180  | 182  | -->PKC                                        |                                           |                             | 3418   | IDH2     | rhahgdqYkaTdfvadragtf   |
| IP100011107 | 256  | 253  | PKC->                                         | PKC->                                     |                             | 3418   | IDH2     | kwplymstknlTilkaydgrfk  |
| IP100011107 | 282  | 285  | INSR->                                        | INSR->                                    |                             | 3418   | IDH2     | ktfdfknkiwYehrlidmva    |
| IP100011107 | 413  | 412  | unsp+CKII->unsp                               | unsp+CKII->unsp+CKII+DNAPK                |                             | 3418   | IDH2     | cvetvesgamTKdlagcigl    |
| IP100011107 | 442  | 440  | unsp+PKC->                                    | unsp+PKC->                                |                             | 3418   | IDH2     | hflntdfldfTiknsldralg   |
| IP100011201 | 94   | 97   | EGFR->                                        | EGFR->                                    |                             | 4200   | ME2      | giqernekilYrildidiesi   |
| IP100011201 | 156  | 161  | PKG+CKII->CKII                                |                                           |                             | 4200   | ME2      | penhvkvavvTdgengilngd   |
| IP100011201 | 224  | 222  |                                               | -->unsp                                   |                             | 4200   | ME2      | likdpfymglYkqldqyqd     |
| IP100011201 | 224  | 228  |                                               | PKG+PKA+DNAPK->PKG+DNAPK                  |                             | 4200   | ME2      | ymyglpkrdTaqydlidief    |
| IP100011201 | 346  | 347  |                                               | -->INSR                                   |                             | 4200   | ME2      | agkikwmfdkYglvlykrkak   |
| IP100011268 | 165  | 160  | unsp+PKG->unsp+PKG+PKA                        |                                           |                             | 22913  | RALY     | vtvplrvrvkTnvpvkifars   |
| IP100011268 | 165  | 170  | PKA->                                         | PKA->                                     |                             | 22913  | RALY     | tnvpvkifarStavttssaki   |
| IP100011285 | 84   | 78   | CKI->                                         |                                           | PHOsphoELM<br>PHOsphoELM    | 823    | CAPN1    | lgyldgpnSsktygikwkrp    |
| IP100011285 | 84   | 80   | PKC->                                         | PKC->                                     |                             | 823    | CAPN1    | ykldgpnsskTygikwkrpte   |
| IP100011416 | 95   | 97   | PKA->                                         |                                           |                             | 1891   | ECH1     | remvecfnkISrdadcravvi   |
| IP100011416 | 318  | 315  | -->CKII                                       | -->CKII                                   |                             | 1891   | ECH1     | qdikvsqatTenkelktvtf    |
| IP100011416 | 327  | 326  | PKC->PKA                                      | PKC->ATM+DNAPK                            |                             | 1891   | ECH1     | enkskeltvtfSkl-----     |
| IP100011518 | 126  | 129  | unsp->                                        | unsp->                                    |                             | 23621  | BACE1    | styrdlrgkyVypytqgkweg   |
| IP100011518 | 126  | 132  | INSR->                                        | INSR->                                    |                             | 23621  | BACE1    | rdlrgkyvvyVytqgkweg     |
| IP100011518 | 307  | 315  | PKC->PKC+cdc2                                 |                                           |                             | 23621  | BACE1    | avksikaassTekfpdgrfwlg  |
| IP100011568 | 136  | 143  | -->cdc2                                       |                                           |                             | 6736   | SRY      | rkakmlpkncSlipadpasvl   |
| IP100011857 | 494  | 493  |                                               | -->ATM+DNAPK                              |                             | 8208   | CHAF1B   | rvntliqawSkttprnrlnt    |
| IP100011857 | 494  | 496  |                                               | unsp+PKC+p38MAPK->unsp+p38MAPK            |                             | 8208   | CHAF1B   | lntliqawSkttprnrlntpik  |
| IP100011875 | 83   | 79   | unsp+PKC->unsp+PKC+PKA                        | unsp+PKC->unsp+PKC+PKA                    |                             | 3550   | IK       | daaarrkkkSyyayrkqei     |
| IP100011875 | 98   | 99   | unsp->                                        | unsp->                                    |                             | 3550   | IK       | iererealeYrdrakerrdg    |
| IP100011875 | 386  | 382  | unsp+PKC+PKA->unsp+PKA+RSK                    |                                           |                             | 3550   | IK       | nmwngvgyndSkfnnkqgi     |
| IP100011875 | 408  | 409  | unsp+CKII->CKII                               | unsp+CKII->CKII                           |                             | 3550   | IK       | pggstkelikSfknkfagsag   |
| IP100011923 | 250  | 255  | unsp+CKII->CKII                               | unsp+CKII->CKII                           |                             | 145258 | GSC      | reeegskldSds-----       |
| IP100011970 | 321  | 326  | unsp+PKC+PKA->unsp+PKC                        |                                           |                             | 51478  | HSD17B7  | llelekhirvTiqktndqarl   |
| IP100012007 | 188  | 183  | unsp+PKC->unsp                                |                                           |                             | 191    | AHCY     | lkvpainvndSvtskfdnlygc  |
| IP100012007 | 188  | 185  | PKC->                                         |                                           |                             | 191    | AHCY     | vpainvndsvTskfdnlygc    |
| IP100012007 | 188  | 187  |                                               | unsp+PKC->ATM+unsp                        |                             | 191    | AHCY     | ainvndsvtkSkfdnlygre    |
| IP100012007 | 188  | 193  | INSR->SRC                                     | INSR->                                    | PhosphoSite                 | 191    | AHCY     | svtskfdnlygcsesidgl     |
| IP100012007 | 408  | 407  | PKC->                                         | PKC->                                     |                             | 191    | AHCY     | ahlgklnvltTiketeqayvl   |
| IP100012007 | 408  | 410  | unsp+PKC+PKG->unsp+PKC                        | unsp+PKC+PKG->unsp+PKC                    |                             | 191    | AHCY     | gklnvltTiketeqayvlms    |
| IP100012011 | 19   | 23   |                                               | unsp+PKA->unsp                            |                             | 1072   | CF11     | kvhndmkrvKSstpeevkrk    |
| IP100012011 | 19   | 25   | unsp+p38MAPK->unsp                            |                                           | PHOsphoELM<br>PhosphoSite   | 1072   | CF11     | fnndmkrvKSstpeevkrkka   |
| IP100012011 | 92   | 89   | unsp->INSR+unsp                               | unsp->INSR+unsp                           |                             | 1072   | CF11     | dcryalydatYetskkeskdel  |
| IP100012011 | 92   | 91   |                                               | CKI+PKC->CKI+DNAPK                        |                             | 1072   | CF11     | ryalydatYetskkeskdelv   |
| IP100012011 | 92   | 94   | unsp+PKC+PKG+CKII->unsp+PKC+CKII              | unsp+PKC+PKG+CKII->unsp+CKII              |                             | 1072   | CF11     | lydatYetskkeskdelv      |
| IP100012011 | 95   | 91   | CKI+PKC->CKI                                  | CKI+PKC->CKI                              |                             | 1072   | CF11     | ryalydatYetskkeskdelv   |
| IP100012011 | 95   | 94   | unsp+PKC+PKG+CKII->unsp+PKA                   | unsp+PKC+PKG+CKII->ATM+unsp+CKII          |                             | 1072   | CF11     | lydatYetskkeskdelv      |
| IP100012011 | 114  | 113  | PKG->PKA                                      | PKG->ATM                                  | PhosphoSite                 | 1072   | CF11     | fwapesaplkSkmyasskda    |
| IP100012011 | 114  | 117  | unsp->                                        |                                           |                             | 1072   | CF11     | fwapesaplkSkmyasskda    |
| IP100012011 | 121  | 113  | PKG->PKG+PKA                                  |                                           |                             | 1072   | CF11     | aplkSkmyaSkdaikkklt     |
| IP100012011 | 121  | 119  | unsp+PKC->unsp                                | unsp+PKC->unsp                            |                             | 1072   | CF11     | plkskmyaSkdaikkkltg     |
| IP100012011 | 121  | 120  | PKC->ATM+PKC+DNAPK                            |                                           |                             | 1072   | CF11     | sskdaikkkltgikhelqanc   |
| IP100012011 | 132  | 129  | PKC->PKC+PKA                                  |                                           |                             | 1072   | CF11     | gikhelqancYeevkdrcila   |
| IP100012011 | 144  | 140  | unsp->EGFR                                    | unsp->unsp+EGFR                           | PHOsphoELM PhosphoSite      | 1072   | CF11     | ncyeevkdrcTlaeklgssav   |
| IP100012011 | 144  | 148  | unsp+PKC+PKA->PKA                             | unsp+PKC+PKA->PKC                         |                             | 1072   | CF11     | ncyeevkdrcTlaeklgssav   |
| IP100012069 | 59   | 57   | PKC->                                         | PKC->                                     |                             | 1728   | NQO1     | fnpiiskdltgkldpanf      |
| IP100012069 | 262  | 266  | PKC->                                         |                                           |                             | 1728   | NQO1     | vghihgkspTdnqikark--    |
| IP100012079 | 591  | 590  |                                               | -->ATM+DNAPK                              |                             | 1975   | E1F4B    | epkpeepnaSkfssaskyaa    |
| IP100012079 | 591  | 593  | PKG->                                         | PKG->                                     |                             | 1975   | E1F4B    | kpeepnaSkfssaskyaa      |
| IP100012079 | 591  | 596  | unsp+PKC->PKC                                 | unsp+PKC->                                |                             | 1975   | E1F4B    | enpaskfssaskyaa         |
| IP100012119 | 138  | 137  | PKC->                                         | PKC->DNAPK                                |                             | 1634   | DCN      | plvklerylSknglkelpk     |
| IP100012149 | 609  | 611  | PKG->                                         | PKG->                                     |                             | 10199  | MPHOSPH1 | kssvdagkySktvaseklq     |
| IP100012174 | 114  | 110  | unsp+PKC+RSK->unsp+PKA+RSK                    | unsp+PKC+RSK->unsp+PKA+RSK                |                             | 6366   | CCL21    | agckrdrgaSktygkkgksg    |
| IP100012174 | 114  | 112  | unsp+PKC->PKC                                 | unsp+PKC->PKC                             |                             | 6366   | CCL21    | gckrdrgaSktygkkgksg     |

Table S3

|             |     |     |                                             |                                                 |        |          |                        |
|-------------|-----|-----|---------------------------------------------|-------------------------------------------------|--------|----------|------------------------|
| IP100012174 | 117 | 110 | unsp+PKC+RSK->unsp+PKC+cdc2+PKA+RSK         | unsp+PKC+RSK->unsp+PKC+PKA+RSK                  | 6366   | CCL21    | aggcrkdrqa5Ktqkkgksgk  |
| IP100012174 | 120 | 119 |                                             | unsp+PKC+PKA->ATM+unsp+PKC+PKA+DNAPK            | 6366   | CCL21    | asktkgkkgkSGkgrtkersq  |
| IP100012199 | 212 | 218 | unsp->unsp+PKA                              |                                                 | 79080  | CDC86    | gfgakkrkgsSSgapaskln   |
| IP100012199 | 213 | 217 | unsp+PKC+PKG+PKA+RSK->unsp+PKG+PKA+RSK      | unsp+PKC+PKG+PKA+RSK->unsp+PKC+PKG+cdc2+PKA+RSK | 79080  | CDC86    | gfgakkrkgsSSgapaskln   |
| IP100012199 | 213 | 218 | unsp->                                      | unsp->                                          | 79080  | CDC86    | gfgakkrkgsSSgapaskln   |
| IP100012341 | 167 | 165 | unsp+PKC+CKII->CKII                         | unsp+PKC+CKII->unsp+CKII                        | 6430   | SFR55    | gdlnalekISgknerkik     |
| IP100012345 | 101 | 97  | unsp+PKC+PKA+RSK->unsp+PKA+RSK              | unsp+PKC+PKA+RSK->unsp+PKA+RSK                  | 6431   | SFR56    | gggyssrrtSGrklygppvr   |
| IP100012345 | 101 | 102 | INSR->                                      |                                                 | 6431   | SFR56    | ssrrtsgrdkYgpprtteyrI  |
| IP100012382 | 60  | 64  | unsp->                                      |                                                 | 6626   | SNRPA    | qafvikevsSatnalsrmag   |
| IP100012442 | 353 | 354 | ->CKII                                      | ->CKII                                          | 10146  | G3BP1    | ignlphvdkSelkdfqsyg    |
| IP100012442 | 357 | 354 | ->CKII                                      | ->CKII                                          | 10146  | G3BP1    | ignlphvdkSelkdfqsyg    |
| IP100012442 | 357 | 362 | PKA->cdc2                                   | PKA->cdc2+PKA                                   | 10146  | G3BP1    | dksekdffqSYgnvnelin    |
| IP100012442 | 376 | 373 | unsp+PKA->PKA                               |                                                 | 10146  | G3BP1    | ymvnelmSGgklprngfv     |
| IP100012446 | 34  | 29  | PKC->                                       | PKC->                                           | 2516   | NR5A1    | gyhylltceSGkoffrtvq    |
| IP100012446 | 34  | 32  | PKC->                                       | PKC->                                           | 2516   | NR5A1    | cesckgfkfTvqnnkhytct   |
| IP100012446 | 38  | 40  |                                             |                                                 | 2516   | NR5A1    | kkdrarqekISvrgkgkgqkr  |
| IP100012567 | 327 | 323 | unsp+PKC->unsp+PKC+RSK                      |                                                 | 7422   | VEGFA    | ggkrkrkksrYksvsvyygar  |
| IP100012567 | 332 | 340 | unsp->INSR+unsp                             |                                                 | 7422   | VEGFA    | pfdeqhtqITkv-----      |
| IP100012587 | 402 | 401 |                                             | ->ATM                                           | 5728   | PTEN     | wsqdrslrkSGvgnvfkln    |
| IP100012726 | 104 | 96  | unsp->unsp+PKA                              |                                                 | 8761   | PABPC4   | gnvfiknldkSldnkalydtf  |
| IP100012726 | 104 | 109 | unsp->                                      | unsp->                                          | 8761   | PABPC4   | gnvfiknldkSldnkalydtf  |
| IP100012750 | 52  | 54  | unsp->                                      | PKC->                                           | 6230   | RP525    | lnnvlfdkfaTydkckevpn   |
| IP100012750 | 52  | 55  | unsp->                                      | PKC->                                           | 6230   | RP525    | lnnvlfdkfaTydkckevpn   |
| IP100012750 | 66  | 65  | unsp->                                      | unsp->                                          | 6230   | RP525    | ydckckevpnYkltpavvse   |
| IP100012750 | 66  | 69  | p38MAPK->                                   |                                                 | 6230   | RP525    | ckevpnkylITpavvserlki  |
| IP100012750 | 94  | 93  | PKC->                                       | PKC->ATM+DNAPK                                  | 6230   | RP525    | laraalqellSkglklvskh   |
| IP100012750 | 94  | 101 | PKC->PKC+cdc2                               | PKC->PKC+cdc2                                   | 6230   | RP525    | llskglklvSkhraqviytr   |
| IP100012788 | 176 | 174 | unsp+PKC->PKC                               | unsp+PKC->PKC                                   | 10849  | CD3EAP   | rsalapnlltSGkkkkemavt  |
| IP100012795 | 264 | 259 |                                             | unsp+PKC->PKC                                   | 8668   | E1F3I    | gqeamdvttsStrigkfearf  |
| IP100012795 | 264 | 260 | PKC->                                       | PKC->                                           | 8668   | E1F3I    | qeamdvttsITrigkfearf   |
| IP100012816 | 265 | 264 |                                             | unsp+PKC->unsp+PKC+DNAPK                        | 10661  | KLf1     | dpgvtaetapSKgrjrsawark |
| IP100012816 | 265 | 270 | unsp+PKC+PKA->unsp+PKC                      |                                                 | 10661  | KLf1     | etapskrgrSwarkrnaaht   |
| IP100012816 | 274 | 270 | unsp+PKC+PKA->unsp+PKA                      |                                                 | 10661  | KLf1     | etapskrgrSwarkrnaaht   |
| IP100012816 | 288 | 290 | INSR->                                      | INSR->                                          | 10661  | KLf1     | tcahpgcgksYtksshikahl  |
| IP100012816 | 288 | 291 | PKC->                                       |                                                 | 10661  | KLf1     | chapgpgksYtksshikahl   |
| IP100012816 | 288 | 293 | PKC->                                       | PKC->                                           | 10661  | KLf1     | hpgcgksytKsshikahlrth  |
| IP100012816 | 288 | 294 | unsp+PKC->unsp+PKC+cdc2                     | unsp+PKC->unsp+PKC+cdc2                         | 10661  | KLf1     | pgcgksytKsshikahlrth   |
| IP100012837 | 166 | 164 |                                             | ->unsp                                          | 3799   | KIF5B    | svhedknrvpYvkgcterfvc  |
| IP100012912 | 510 | 509 | unsp+PKC->                                  | unsp+PKC->ATM                                   | 1376   | CTP2     | tetrpasyVtkrcseafvrc   |
| IP100012912 | 510 | 513 | unsp->                                      | unsp->                                          | 1376   | CTP2     | rpasyvtkrcseafvrc      |
| IP100012912 | 537 | 536 |                                             | ->DNAPK                                         | 1376   | CTP2     | gelsqmmvcsKshyghrsh    |
| IP100012912 | 544 | 543 | unsp+PKC->unsp                              | unsp+PKC->ATM+unsp+DNAPK                        | 1376   | CTP2     | vecksyhgqITkeamnggaf   |
| IP100012972 | 91  | 94  | EGFR->                                      | EGFR->                                          | 4833   | NME4     | hygdrrkpfYpallirmssg   |
| IP100013070 | 270 | 268 | unsp->                                      | unsp->                                          | 11100  | HNRNPUL1 | cfemkineeiSVkhlpstcpd  |
| IP100013070 | 270 | 275 | PKC+cdc2->cdc2                              | PKC+cdc2->cdc2                                  | 11100  | HNRNPUL1 | eisvkhlpstcpdphvvr     |
| IP100013122 | 240 | 248 | ->INSR                                      | ->INSR                                          | 11140  | CD3C7    | ftkiktadqrYmgnfndelea  |
| IP100013122 | 330 | 322 | unsp+CKI->unsp+CKI+cdc2                     |                                                 | 11140  | CD3C7    | kdvqmlqdaISkmdptdakyh  |
| IP100013122 | 330 | 327 | PKC->                                       | PKC->                                           | 11140  | CD3C7    | lqdaismdpTdkakyhmrcr   |
| IP100013159 | 11  | 2   | ->cdc2                                      |                                                 | 2120   | ETV6     | -----mSfcpagcaisk      |
| IP100013159 | 11  | 9   | unsp+PKC->                                  | unsp+PKC->                                      | 2120   | ETV6     | -----mSfcpagcaisk      |
| IP100013159 | 11  | 16  | unsp+PKA->unsp+cdc2                         | unsp+PKA->unsp+cdc2                             | 2120   | ETV6     | aqcsikqerSYtpdespvp    |
| IP100013159 | 302 | 307 | unsp+PKC->unsp+PKC+cdc2                     | unsp+PKC->unsp+cdc2                             | 2120   | ETV6     | lhreqpinIShredalymnh   |
| IP100013160 | 337 | 336 | ->PKA                                       | ->ATM+DNAPK                                     | 1939   | LTGN     | qeqiivkelISgvesivadv   |
| IP100013184 | 136 | 137 | unsp->SRC+unsp                              | unsp->SRC+unsp                                  | 8260   | NAA10    | nfqisevepyYadgedayam   |
| IP100013184 | 136 | 138 | INSR+unsp->unsp                             |                                                 | 8260   | NAA10    | nfqisevepyYadgedayam   |
| IP100013185 | 205 | 200 | unsp+PKC->unsp                              |                                                 | 8242   | KDM5C    | ykphsiplrqSVqpskfnsyg  |
| IP100013185 | 205 | 204 | ->PKA                                       |                                                 | 8242   | KDM5C    | siplrqsvqSVqpskfnsyg   |
| IP100013185 | 205 | 208 | unsp->                                      |                                                 | 8242   | KDM5C    | rsqvqpskfnsygrakrkap   |
| IP100013205 | 602 | 598 | PKC->                                       |                                                 | 23030  | KDM4B    | karagegapSfslklmeik    |
| IP100013205 | 602 | 599 | PKC->                                       |                                                 | 23030  | KDM4B    | aragegapSfslklmeik     |
| IP100013205 | 602 | 601 |                                             | PKC->ATM+PKC+DNAPK                              | 23030  | KDM4B    | agegapstfSklkmeikrs    |
| IP100013205 | 602 | 610 | unsp+PKC+PKA->unsp+PKC                      | unsp+PKC+PKA->unsp+PKC                          | 23030  | KDM4B    | fsklkmeikSrrhlprprt    |
| IP100013215 | 326 | 325 |                                             | PKA->ATM+DNAPK                                  | 4998   | ORC1L    | niilrtiaaSktdireert    |
| IP100013296 | 8   | 2   | ->PKA                                       |                                                 | 645958 | RP518P9  | -----mSlvipekfghi      |
| IP100013296 | 94  | 95  | INSR+unsp->unsp                             |                                                 | 645958 | RP518P9  | nrqkdvdkgdYSyavlangld  |
| IP100013396 | 52  | 48  | unsp+CKI+PKC->unsp+CKI+PKA                  | unsp+CKI+PKC->unsp+CKI+PKA                      | 6631   | SNRPC    | yqkwmeeqqSldkttaefq    |
| IP100013396 | 52  | 54  | ->PKC                                       |                                                 | 6631   | SNRPC    | esqslidktTaefaqgkpp    |
| IP100013404 | 45  | 42  | PKC->                                       |                                                 | 4089   | SMAD4    | setfakraieSlvkllekkd   |
| IP100013404 | 428 | 430 | INSR->                                      | INSR->                                          | 4089   | SMAD4    | ragpdavhkiYpsayikvfdl  |
| IP100013404 | 428 | 434 | INSR+EGFR->EGFR                             | INSR+EGFR->EGFR                                 | 4089   | SMAD4    | davhkiypsaYikvdlrgh    |
| IP100013404 | 507 | 504 | cdc2->PKA+cdc2                              | cdc2->PKA+cdc2                                  | 4089   | SMAD4    | dlrlclirmSVfkgwgdpdy   |
| IP100013415 | 74  | 71  | PKC->                                       |                                                 | 6201   | RP57     | ilfvpvpqkSfqkiqrivr    |
| IP100013452 | 542 | 547 | unsp->                                      | unsp->                                          | 2058   | EPBS     | pevgklpwySpkvfiegada   |
| IP100013452 | 788 | 786 | unsp+PKC->                                  | unsp+PKC->                                      | 2058   | EPBS     | dvdavaqkISkayekktg     |
| IP100013468 | 179 | 176 | unsp+PKC+PKG+cdc2+PKA+RSK->unsp+PKG+PKA+RSK | unsp+PKC+PKG+cdc2+PKA+RSK->unsp+PKG+PKA+RSK     | 1984   | BUB3     | nnnyvgqrreSalukytrtir  |
| IP100013468 | 179 | 177 | unsp+PKC+PKA->PKA+RSK                       | unsp+PKC+PKA->PKA+DNAPK+RSK                     | 1984   | BUB3     | ngsvqqrreSalukytrtir   |
| IP100013468 | 179 | 180 | unsp->                                      |                                                 | 1984   | BUB3     | vqqrreSalukytrtir      |
| IP100013485 | 263 | 259 | PKC->                                       |                                                 | 6187   | RP52     | sytlpdllwkeTVtkspygqf  |
| IP100013485 | 263 | 262 | PKC+PKG->                                   | PKC+PKG->DNAPK                                  | 6187   | RP52     | tpdlwketvITkspygqfth   |
| IP100013485 | 263 | 264 | unsp->unsp+p38MAPK                          |                                                 | 6187   | RP52     | dlwketvITkspygqfthlv   |
| IP100013485 | 263 | 266 | unsp+EGFR->                                 |                                                 | 6187   | RP52     | wketvITkspygqfthlvkt   |
| IP100013485 | 275 | 276 |                                             |                                                 | 6187   | RP52     | yqfthlvktThtrsvqrvtq   |
| IP100013508 | 492 | 490 | unsp+PKC->                                  | unsp+PKC->DNAPK                                 | 87     | ACTN1    | cdqwdnldgaITkrealert   |
| IP100013683 | 58  | 56  | unsp+PKC->                                  |                                                 | 10381  | UBBP3    | rtsvyqrreSalukytrtir   |
| IP100013721 | 358 | 354 | unsp+PKC+PKA->unsp+PKA                      | unsp+PKC+PKA->unsp+PKA                          | 8899   | PRPF4B   | rgprskprISpdkprkrs     |
| IP100013721 | 358 | 356 | unsp+cdc2+p38MAPK->unsp+cdc2+RSK+p38MAPK    | unsp+cdc2+p38MAPK->unsp+GSK3+cdk5+cdc2+RSK      | 8899   | PRPF4B   | rgprskprISpdkprkrs     |
| IP100013721 | 358 | 363 | unsp+PKC+PKA->unsp+PKC                      | unsp+PKC+PKA->unsp+PKC                          | 8899   | PRPF4B   | rsldspkrISpdkprkrs     |
| IP100013721 | 358 | 366 | unsp+PKA->unsp+cdc2+PKA                     |                                                 | 8899   | PRPF4B   | spkprkrsISpdkprkrs     |
| IP100013723 | 46  | 41  |                                             | unsp+CKI->unsp                                  | 5300   | PIN1     | asqwerpsgnSSggknqgqe   |
| IP100013723 | 46  | 43  | PKC+cdc2->                                  | PKC+cdc2->PKC                                   | 5300   | PIN1     | qkwerpsgnSSggknqgqe    |
| IP100013774 | 74  | 67  | unsp+PKC->                                  | INSR+unsp->unsp                                 | 3065   | HDAC1    | lhkanaemtkYhsddykifr   |
| IP100013774 | 74  | 78  |                                             |                                                 | 3065   | HDAC1    | hsddykifrISpdkprkrs    |
| IP100013774 | 89  | 88  |                                             | ->DNAPK                                         | 3065   | HDAC1    | siplrqsvqSVqpskfnsyg   |
| IP100013774 | 218 | 221 | unsp->                                      | unsp->                                          | 3065   | HDAC1    | ldigagkgkYyavnyplrdg   |
| IP100013774 | 220 | 221 | unsp->                                      |                                                 | 3065   | HDAC1    | ldigagkgkYyavnyplrdg   |
| IP100013774 | 220 | 222 | ->unsp                                      |                                                 | 3065   | HDAC1    | ldigagkgkYyavnyplrdg   |
| IP100013774 | 432 | 434 | unsp+PKG+cdc2+PKA+RSK->PKC+cdc2+RSK         | unsp+PKG+cdc2+PKA+RSK->cdc2+RSK                 | 3065   | HDAC1    | eeeggrknsSfnfkkakrvk   |
| IP100013774 | 432 | 435 | PKC->cdc2                                   | PKC->PKC+cdc2                                   | 3065   | HDAC1    | eeeggrknsSfnfkkakrvk   |
| IP100013774 | 438 | 435 | PKC->                                       | PKC->                                           | 3065   | HDAC1    | eeeggrknsSfnfkkakrvk   |
| IP100013774 | 439 | 434 | unsp+PKG+cdc2+PKA+RSK->PKG+cdc2+PKA+RSK     | unsp+PKG+cdc2+PKA+RSK->PKG+cdc2+PKA+RSK         | 3065   | HDAC1    | eeeggrknsSfnfkkakrvk   |
| IP100013774 | 439 | 435 | PKC->                                       | PKC->                                           | 3065   | HDAC1    | eeeggrknsSfnfkkakrvk   |
| IP100013774 | 441 | 435 |                                             | PKC->PKC+cdc2                                   | 3065   | HDAC1    | eeeggrknsSfnfkkakrvk   |
| IP100013774 | 441 | 445 |                                             | unsp+PKG+CKII+RSK->unsp+CKII+RSK                | 3065   | HDAC1    | sfnfkkakrvkTedeekdpde  |
| IP100013808 | 625 | 621 |                                             | ->unsp+PKG                                      | 81     | ACTN4    | yttvtpqinSkwekvqqlvp   |
| IP100013830 | 115 | 113 | unsp->                                      |                                                 | 22938  | SNW1     | rgqskdkvYsktydlvpke    |
| IP100013830 | 115 | 114 | ->PKA+DNAPK                                 | ->ATM+DNAPK                                     | 22938  | SNW1     | qgskdkvYsktydlvpke     |
| IP100013830 | 115 | 117 |                                             | PKC->                                           | 22938  | SNW1     | skdkvYsktydlvpke       |
| IP100013847 | 111 | 107 | unsp+PKA->unsp+PKA+RSK                      | unsp+PKA->unsp+PKG+PKA                          | 7384   | UQCRC1   | afktgknppgSalekevesmg  |
| IP100013847 | 138 | 132 |                                             | INSR->                                          | 7384   | UQCRC1   | aystretayYikalskldpk   |
| IP100013847 | 138 | 137 | PKC+cdc2->PKC+PKA+cdc2                      | PKC+cdc2->unsp+ATM+cdc2+DNAPK                   | 7384   | UQCRC1   | ehnyayYikalskldpk      |
| IP100013862 | 169 | 171 | PKG->                                       | PKG->                                           | 1841   | DTYMK    | lrcfhqmkdITtnkwrmdas   |
| IP100013871 | 17  | 20  | PKC->PKC+cdc2                               | PKC->PKC+cdc2                                   | 6240   | RRM1     | qervmfkdtSniqklycgl    |
| IP100013871 | 376 | 373 | unsp+PKC+cdc2->unsp+cdc2                    | unsp+PKC+cdc2->unsp                             | 6240   | RRM1     | wgeefekYaeSyekqgrvrk   |
| IP100013871 | 496 | 494 | unsp+PKC->                                  | unsp+PKC->                                      | 6240   | RRM1     | nyyvppeadISnkrhrpigr   |
| IP100013894 | 8   | 16  | unsp->unsp+cdc2                             |                                                 | 10963  | STIP1    | elkekgngalSvgnldalqc   |
| IP100013894 | 68  | 64  | PKC+CKII->CKII                              | PKC+CKII->CKII                                  | 10963  | STIP1    | yqkayedgcTvdllpdwgk    |
| IP100013894 | 73  | 76  | PKC+cdc2->cdc2                              |                                                 | 10963  | STIP1    | dikpdwgkYsrkaalefn     |
| IP100013894 | 312 | 309 | PKC->PKA                                    |                                                 | 10963  | STIP1    | lakayarginYfkeekykda   |
| IP100013894 | 312 | 310 | INSR->                                      |                                                 | 10963  | STIP1    | akayarginYfkeekykda    |
| IP100013894 | 325 | 326 | PKA->PKA+DNAPK                              | PKA->PKA+DNAPK                                  | 10963  | STIP1    | ykdailfynkSlaehrtpdvl  |
| IP100013894 | 446 | 444 | INSR+EGFR->                                 | INSR+EGFR->unsp+INSR+EGFR                       | 10963  | STIP1    | kaaleamkdytkamdvYqka   |
| IP100013894 | 446 | 445 |                                             | ->DNAPK                                         | 10963  | STIP1    | aaaleamkdytkamdvYqka   |
| IP100013894 | 446 | 451 | unsp->unsp+EGFR                             |                                                 | 10963  | STIP1    | mkdytkamdvYqkaldldsc   |
| IP100013895 | 3   | 5   | PKA->                                       | PKA->                                           | 6282   | S100A11  | -----makISptetercie    |
| IP100013895 | 3   | 6   | unsp->unsp+CKII                             | unsp->unsp+CKII                                 | 6282   | S100A11  | -----makISptetercie    |
| IP100013914 | 983 | 982 |                                             | unsp+PKC+PKA->unsp+PKA+DNAPK                    | 5896   | RAG1     | rrfrkmnarqSKcyemedvkl  |
| IP100013957 | 148 | 147 |                                             | unsp->unsp+DNAPK                                | 788    | SLC25A20 | lliqassgeSKygttdlca    |
| IP100013957 | 244 | 239 | unsp+PKG->unsp+PKG+PKA                      | unsp+PKG->unsp+PKG+PKA                          | 788    | SLC25A20 | ppdvksrfqTappgypnfg    |

Table S3

|             |      |      |                                          |                                          |                            |       |          |                        |
|-------------|------|------|------------------------------------------|------------------------------------------|----------------------------|-------|----------|------------------------|
| IP100013991 | 118  | 123  | unsp->unsp+CKI                           |                                          |                            | 7169  | TPM2     | leeeakaadeSergmkvienr  |
| IP100013999 | 246  | 251  | unsp+PKC->PKC                            | unsp+PKC->PKC                            |                            | 2623  | GATA1    | lirpkririvSkragtqnc    |
| IP100013999 | 312  | 310  | unsp+PKC+PKB->unsp+PKC+PKB+RSK           | unsp+PKC+PKB->unsp+PKC+PKB+RSK           | iprot[PHOsphoELM]PhosphoSi | 2623  | GATA1    | dgigtrnrkaSgkqkkrgss   |
| IP100013999 | 314  | 310  | unsp+PKC+PKB->unsp+PKC+PKB+RSK           | unsp+PKC+PKB->unsp+PKC+PKB+RSK           | iprot[PHOsphoELM]PhosphoSi | 2623  | GATA1    | dgigtrnrkaSgkqkkrgss   |
| IP100014068 | 455  | 457  | cdc2+PKA->cdc2                           | cdc2+PKA->cdc2                           |                            | 10298 | PAK4     | lthdgrveksSgfgicacqk   |
| IP100014068 | 467  | 466  | unsp->ATM+unsp+DNAPK                     | unsp->ATM+unsp+DNAPK                     |                            | 10298 | PAK4     | lsdfgtcaqySkvegrprksiv |
| IP100014198 | 116  | 117  | unsp->unsp+cdc2                          | unsp->unsp+cdc2                          |                            | 23016 | EXOSC7   | ntlyrnfnnkSvdlkticis   |
| IP100014198 | 116  | 118  | PKC+PKA->PKC                             | PKC+PKA->                                |                            | 23016 | EXOSC7   | tylrnfnnkSvdlkticisp   |
| IP100014199 | 274  | 277  | PKC+cdc2+PKA->cdc2+PKA                   |                                          |                            | 9744  | ACAP1    | vmeghlfrkaSnaftwrrrw   |
| IP100014213 | 236  | 229  | ->cdc2                                   |                                          |                            | 23395 | LARS2    | qvdehgcswrSgavkeqylr   |
| IP100014230 | 91   | 87   |                                          | CKI+CKII->unsp+CKI+CKII                  |                            | 708   | C1QBP    | dgdkarvdfISdeikeerkiq  |
| IP100014266 | 304  | 309  | PKG+PKA->PKA                             |                                          |                            | 8019  | BRD3     | pqhagkgkISehlyrcdil    |
| IP100014305 | 135  | 138  | unsp+PKC->PKC                            | unsp+PKC->PKC                            |                            | 7705  | ZNF146   | fvckecgkITsgksnltehek  |
| IP100014305 | 140  | 136  | PKC->                                    | PKC->                                    |                            | 7705  | ZNF146   | fvckecgkITsgksnltehek  |
| IP100014305 | 140  | 138  | unsp+PKC->PKC                            | unsp+PKC->                               |                            | 7705  | ZNF146   | fvckecgkITsgksnltehek  |
| IP100014344 | 105  | 103  | PKC->                                    | PKC->                                    |                            | 1859  | DYRK1A   | lrklsvdlkITykhinevyaya |
| IP100014361 | 147  | 143  |                                          | unsp->unsp+EGFR                          |                            | 7264  | TSTA3    | ngphnsnfgYSyakrmidvq   |
| IP100014361 | 147  | 144  | PKC->                                    |                                          |                            | 7264  | TSTA3    | gpphnsnfgYSyakrmidvqn  |
| IP100014424 | 179  | 175  | ->unsp                                   | ->unsp                                   |                            | 1917  | EEF1A2   | krydeivkevsYikkigynp   |
| IP100014424 | 179  | 183  | EGFR->                                   |                                          |                            | 1917  | EEF1A2   | evsaikkigYnpatvpfvpri  |
| IP100014513 | 174  | 166  | unsp->unsp+cdc2                          |                                          |                            | 7528  | YY1      | agksggggssSsgggrvkkgg  |
| IP100014575 | 105  | 103  | unsp+PKC->cdc2                           | unsp+PKC->                               |                            | 990   | CDC6     | grrrvfdnqITkspskrela   |
| IP100014575 | 109  | 109  | unsp+PKC->cdc2                           | unsp+PKC->unsp+PKC+cdc2                  |                            | 990   | CDC6     | grrrvfdnqITkspskrela   |
| IP100014575 | 109  | 108  | unsp->unsp+PKA                           | unsp->unsp+DNAPK                         |                            | 990   | CDC6     | grrrvfdnqITkspskrela   |
| IP100014898 | 187  | 184  | PKC+PKG->                                |                                          |                            | 5339  | PLEC1    | tderdvqkktITfkwnknkli  |
| IP100014898 | 187  | 186  |                                          | PKC->PKC+DNAPK                           |                            | 5339  | PLEC1    | tderdvqkktITfkwnknkli  |
| IP100014898 | 2841 | 2833 | ->cdc2+PKA                               |                                          |                            | 5339  | PLEC1    | tderdvqkktITfkwnknkli  |
| IP100014898 | 3420 | 3417 | PKC->                                    | PKC->                                    |                            | 5339  | PLEC1    | tderdvqkktITfkwnknkli  |
| IP100014903 | 7    | 2    | ->PKA                                    |                                          |                            | 26127 | FGFR1OP2 | -----mSciekalada       |
| IP100014911 | 405  | 403  | PKC->                                    | PKC->                                    |                            | 7226  | TRPM2    | tttesrivewTKkiadivrrr  |
| IP100014911 | 1104 | 1101 | PKC+GSK3+cdk5+p38MAPK->GSK3+cdk5+p38MAPK | PKC+GSK3+cdk5+p38MAPK->GSK3+cdk5+p38MAPK |                            | 7226  | TRPM2    | tttesrivewTKkiadivrrr  |
| IP100014925 | 376  | 371  | PKC->PKA                                 | PKC->                                    |                            | 9401  | RECQL4   | khvrrgralSRlrkqawkkq   |
| IP100014925 | 380  | 371  | PKC->PKC+cdc2                            | PKC->                                    |                            | 9401  | RECQL4   | khvrrgralSRlrkqawkkq   |
| IP100014938 | 142  | 138  | unsp->unsp+PKA                           |                                          |                            | 84324 | SARNP    | gissvptkglISdnkpmvnlid |
| IP100014938 | 142  | 139  | unsp+PKC->PKA                            | unsp+PKC->PKC                            |                            | 84324 | SARNP    | gissvptkglISdnkpmvnlid |
| IP100015029 | 7    | 5    | unsp+PKC->                               | unsp+PKC->                               |                            | 10728 | PTGES3   | -----mqpaSakwydrdyv    |
| IP100015029 | 33   | 37   | PKC->                                    |                                          |                            | 10728 | PTGES3   | -----mqpaSakwydrdyv    |
| IP100015077 | 58   | 54   |                                          | unsp->INSR+unsp                          |                            | 10209 | EIF1     | lttgviaddYdkkkvkkafk   |
| IP100015105 | 4    | 8    | unsp->                                   | unsp->                                   |                            | 1164  | CKS2     | -----mahkaiyYsdqydehye |
| IP100015105 | 4    | 9    | unsp+PKC->PKC                            |                                          |                            | 1164  | CKS2     | -----mahkaiyYsdqydehye |
| IP100015105 | 4    | 12   | unsp->INSR+unsp                          | unsp->INSR+unsp                          |                            | 1164  | CKS2     | -----mahkaiyYsdqydehye |
| IP100015180 | 1341 | 1337 | unsp+PKC+cdc2->unsp+PKC                  |                                          |                            | 357   | SHROOM2  | -----mSciekalada       |
| IP100015262 | 8    | 3    | PKC->                                    |                                          |                            | 1265  | CNN2     | -----msTqfnkpspyg      |
| IP100015262 | 8    | 4    | PKC->                                    | PKC->                                    |                            | 1265  | CNN2     | -----msTqfnkpspyg      |
| IP100015262 | 8    | 11   | unsp->                                   | unsp->                                   |                            | 1265  | CNN2     | -----msTqfnkpspyg      |
| IP100015262 | 8    | 12   | unsp->                                   | unsp->                                   |                            | 1265  | CNN2     | -----msTqfnkpspyg      |
| IP100015262 | 25   | 24   |                                          | unsp+PKC+PKA+RSK->ATM+unsp+PKA+DNAPK+RSK |                            | 1265  | CNN2     | -----msTqfnkpspyg      |
| IP100015361 | 42   | 41   |                                          | unsp->unsp+DNAPK                         |                            | 5204  | PFDN5    | tsiaqkvvgITkyvkaedcldn |
| IP100015361 | 42   | 43   | unsp+EGFR->unsp                          | unsp+EGFR->unsp                          |                            | 5204  | PFDN5    | tsiaqkvvgITkyvkaedcldn |
| IP100015361 | 112  | 111  |                                          | PKC->                                    |                            | 5204  | PFDN5    | tsiaqkvvgITkyvkaedcldn |
| IP100015602 | 185  | 186  | unsp+EGFR->unsp                          |                                          |                            | 9868  | TOMM70A  | ctkavelnlpYvkalfraka   |
| IP100015609 | 61   | 64   | PKC->                                    |                                          |                            | 54876 | DCAF16   | wqvccllykSTwklpnpnsw   |
| IP100015609 | 61   | 65   | unsp+PKC->unsp                           |                                          |                            | 54876 | DCAF16   | wqvccllykSTwklpnpnsw   |
| IP100015671 | 401  | 406  | unsp+INSR->unsp                          | unsp+INSR->unsp                          |                            | 79861 | TUBAL3   | aridhkfdlmYakraflhwyl  |
| IP100015671 | 408  | 406  | unsp+INSR->                              |                                          |                            | 79861 | TUBAL3   | aridhkfdlmYakraflhwyl  |
| IP100015811 | 208  | 210  | unsp+PKC+cdc2->PKC+cdc2                  |                                          |                            | 5922  | RASA2    | vgpsrmdqkkITkvkktsnnpq |
| IP100015811 | 211  | 210  | unsp+PKC+cdc2->PKC+cdc2                  | unsp+PKC+cdc2->PKC+cdc2                  |                            | 5922  | RASA2    | vgpsrmdqkkITkvkktsnnpq |
| IP100015811 | 213  | 210  | unsp+PKC+cdc2->PKC+cdc2                  | unsp+PKC+cdc2->PKC+cdc2                  |                            | 5922  | RASA2    | vgpsrmdqkkITkvkktsnnpq |
| IP100015811 | 213  | 217  | PKC+PKG+PKA->                            | PKC+PKG+PKA->                            |                            | 5922  | RASA2    | vgpsrmdqkkITkvkktsnnpq |
| IP100015811 | 214  | 210  | unsp+PKC+cdc2->PKC+cdc2                  | unsp+PKC+cdc2->PKC+cdc2                  |                            | 5922  | RASA2    | vgpsrmdqkkITkvkktsnnpq |
| IP100015811 | 214  | 216  | PKG->PKG+PKG                             |                                          |                            | 5922  | RASA2    | vgpsrmdqkkITkvkktsnnpq |
| IP100015811 | 214  | 217  | PKG+PKG+PKA->PKG                         | PKG+PKG+PKA->PKG+PKG                     |                            | 5922  | RASA2    | vgpsrmdqkkITkvkktsnnpq |
| IP100015833 | 142  | 141  | ->EGFR                                   | ->EGFR                                   |                            | 54927 | CHCHD3   | drvlkqkdafTkeqlarleer  |
| IP100015856 | 41   | 46   | unsp+GSK3+PKA->GSK3                      | unsp+GSK3+PKA->GSK3+PKG                  |                            | 23549 | DNPEP    | akellkfvnrSpsphavac    |
| IP100015864 | 684  | 689  | unsp+PKA+DNAPK->DNAPK                    | unsp+PKA+DNAPK->DNAPK                    |                            | 6041  | RNASEL   | kkmkigdpdSlytqktfpld   |
| IP100015865 | 109  | 108  | unsp->                                   | unsp+PKA+DNAPK->DNAPK                    |                            | 54936 | ADPRM12  | vdmalrfaqeYtkdpdrgyga  |
| IP100015905 | 165  | 160  | unsp+PKC->unsp+PKA                       | unsp+EGFR                                |                            | 23404 | EXOSC2   | sdgvaslhtISkyvgkigagv  |
| IP100015905 | 165  | 163  | unsp->                                   | unsp+PKC->unsp+PKA                       |                            | 23404 | EXOSC2   | sdgvaslhtISkyvgkigagv  |
| IP100015911 | 127  | 129  | PKC->                                    | unsp+PKC->unsp+PKA                       |                            | 1738  | DLD      | nlidmmeqksTavkaltggia  |
| IP100015911 | 320  | 319  | PKA->DNAPK                               |                                          |                            | 1738  | DLD      | nlidmmeqksTavkaltggia  |
| IP100015911 | 417  | 416  | ->SRC                                    |                                          |                            | 1738  | DLD      | nlidmmeqksTavkaltggia  |
| IP100015911 | 420  | 416  | ->INSR                                   |                                          |                            | 1738  | DLD      | nlidmmeqksTavkaltggia  |
| IP100015934 | 369  | 363  | unsp+RSK->unsp+PKA+RSK                   | unsp+RSK->unsp+PKA+RSK                   |                            | 688   | KLf5     | niqprvynrSnpdlekrrih   |
| IP100015934 | 369  | 377  | ->INSR                                   | ->INSR                                   |                            | 688   | KLf5     | niqprvynrSnpdlekrrih   |
| IP100015953 | 779  | 776  | unsp+PKC+PKG->PKG+PKA                    | unsp+PKC+PKG->unsp+PKC+PKG+PKA           | PhosphoSite                | 688   | KLf5     | niqprvynrSnpdlekrrih   |
| IP100015953 | 779  | 778  | unsp+PKC+PKG->unsp+PKA+RSK               | unsp+PKC+PKG->unsp+PKC+PKG+PKA           |                            | 688   | KLf5     | niqprvynrSnpdlekrrih   |
| IP100015973 | 514  | 510  | PKC->PKA                                 | unsp+PKC+PKG->unsp+PKA+RSK               |                            | 688   | KLf5     | niqprvynrSnpdlekrrih   |
| IP100015973 | 514  | 513  |                                          | unsp+PKC+PKG->unsp+PKA+RSK               |                            | 688   | KLf5     | niqprvynrSnpdlekrrih   |
| IP100015973 | 514  | 518  |                                          | unsp+PKC+PKG->unsp+PKA+RSK               |                            | 688   | KLf5     | niqprvynrSnpdlekrrih   |
| IP100016284 | 537  | 539  | unsp+PKC+PKG+PKA->unsp+PKC+PKA           | unsp+PKC+PKG+PKA->unsp+PKC+PKA           |                            | 688   | KLf5     | niqprvynrSnpdlekrrih   |
| IP100016284 | 538  | 539  | unsp+PKC+PKG+PKA->unsp+PKC+PKA           | unsp+PKC+PKG+PKA->unsp+PKC+PKA           |                            | 688   | KLf5     | niqprvynrSnpdlekrrih   |
| IP100016287 | 281  | 276  | unsp+PKA->PKA                            | unsp+PKC+PKG+PKA->unsp+PKC+PKA           |                            | 688   | KLf5     | niqprvynrSnpdlekrrih   |
| IP100016405 | 96   | 93   | unsp+PKA->PKA                            | unsp+PKC+PKG+PKA->unsp+PKC+PKA           |                            | 688   | KLf5     | niqprvynrSnpdlekrrih   |
| IP100016405 | 96   | 97   | ->CKII                                   | unsp+PKA->PKA                            |                            | 688   | KLf5     | niqprvynrSnpdlekrrih   |
| IP100016405 | 131  | 134  | unsp->                                   | ->unsp+CKII                              |                            | 688   | KLf5     | niqprvynrSnpdlekrrih   |
| IP100016405 | 131  | 136  | unsp->cdc2                               | ->unsp+CKII                              |                            | 688   | KLf5     | niqprvynrSnpdlekrrih   |
| IP100016457 | 261  | 263  | ->EGFR                                   | unsp->unsp+cdc2                          |                            | 688   | KLf5     | niqprvynrSnpdlekrrih   |
| IP100016458 | 104  | 99   | PKC->                                    | unsp->unsp+cdc2                          |                            | 688   | KLf5     | niqprvynrSnpdlekrrih   |
| IP100016513 | 102  | 101  | ->PKA                                    | ->EGFR                                   |                            | 688   | KLf5     | niqprvynrSnpdlekrrih   |
| IP100016532 | 27   | 26   | unsp->unsp+PKA                           | ->ATM+DNAPK                              |                            | 688   | KLf5     | niqprvynrSnpdlekrrih   |
| IP100016532 | 27   | 35   | CKII->cdc2+CKII                          |                                          |                            | 688   | KLf5     | niqprvynrSnpdlekrrih   |
| IP100016568 | 186  | 187  | unsp+GSK3->                              | unsp+GSK3->                              |                            | 688   | KLf5     | niqprvynrSnpdlekrrih   |
| IP100016572 | 16   | 18   | unsp+PKC+PKA->unsp+PKC                   | unsp+GSK3->                              |                            | 688   | KLf5     | niqprvynrSnpdlekrrih   |
| IP100016589 | 23   | 20   | unsp->                                   | unsp+PKC+PKA->unsp+PKC                   |                            | 688   | KLf5     | niqprvynrSnpdlekrrih   |
| IP100016589 | 23   | 21   | unsp+PKC->                               | unsp+PKC->                               |                            | 688   | KLf5     | niqprvynrSnpdlekrrih   |
| IP100016589 | 23   | 22   |                                          | unsp+PKC->unsp+PKC+DNAPK                 |                            | 688   | KLf5     | niqprvynrSnpdlekrrih   |
| IP100016610 | 23   | 27   | unsp+PKC+cdc2->cdc2                      |                                          |                            | 688   | KLf5     | niqprvynrSnpdlekrrih   |
| IP100016613 | 102  | 106  | unsp->                                   |                                          |                            | 688   | KLf5     | niqprvynrSnpdlekrrih   |
| IP100016613 | 102  | 108  | p38MAPK->                                |                                          |                            | 688   | KLf5     | niqprvynrSnpdlekrrih   |
| IP100016637 | 174  | 169  | PKC->                                    |                                          |                            | 688   | KLf5     | niqprvynrSnpdlekrrih   |
| IP100016637 | 174  | 172  | EGFR->                                   |                                          |                            | 688   | KLf5     | niqprvynrSnpdlekrrih   |
| IP100016637 | 174  | 176  | cdk5->cdk5+p38MAPK                       |                                          |                            | 688   | KLf5     | niqprvynrSnpdlekrrih   |
| IP100016801 | 84   | 79   | unsp+PKA+RSK->unsp+PKA                   | unsp+PKA+RSK->unsp+PKA                   |                            | 688   | KLf5     | niqprvynrSnpdlekrrih   |
| IP100016801 | 457  | 455  | unsp+PKC->                               | unsp+PKC->                               |                            | 688   | KLf5     | niqprvynrSnpdlekrrih   |
| IP100016801 | 503  | 498  | unsp->unsp+PKA                           | unsp+PKC->                               |                            | 688   | KLf5     | niqprvynrSnpdlekrrih   |
| IP100016801 | 503  | 501  | unsp+PKC->unsp                           | unsp->unsp+PKA                           |                            | 688   | KLf5     | niqprvynrSnpdlekrrih   |
| IP100016801 | 503  | 508  | PKC+PKA->                                | unsp+PKC->unsp                           |                            | 688   | KLf5     | niqprvynrSnpdlekrrih   |
| IP100016801 | 527  | 524  | PKC+PKG->PKG                             | PKC+PKA->                                |                            | 688   | KLf5     | niqprvynrSnpdlekrrih   |
| IP100016801 | 545  | 550  | ->EGFR                                   | PKC+PKG->PKG                             |                            | 688   | KLf5     | niqprvynrSnpdlekrrih   |
| IP100016862 | 401  | 404  |                                          | unsp+cdc2->unsp+CKII+cdc2                |                            | 688   | KLf5     | niqprvynrSnpdlekrrih   |
| IP100016862 | 401  | 408  | unsp+EGFR->INSR+unsp+EGFR                | unsp+cdc2->unsp+CKII+cdc2                |                            | 688   | KLf5     | niqprvynrSnpdlekrrih   |
| IP100016910 | 558  | 554  |                                          | ->EGFR                                   |                            | 688   | KLf5     | niqprvynrSnpdlekrrih   |
| IP100016910 | 558  | 556  |                                          | ->unsp                                   |                            | 688   | KLf5     | niqprvynrSnpdlekrrih   |
| IP100017283 | 189  | 186  | unsp+PKC->unsp                           | unsp+PKC->                               |                            | 688   | KLf5     | niqprvynrSnpdlekrrih   |
| IP100017283 | 233  | 239  | unsp+PKG->unsp+PKG+cdc2                  | unsp+PKC->                               |                            | 688   | KLf5     | niqprvynrSnpdlekrrih   |
| IP100017283 | 241  | 239  | unsp+PKG->unsp+PKG+cdc2                  | unsp+PKG->unsp+PKG+cdc2                  |                            | 688   | KLf5     | niqprvynrSnpdlekrrih   |
| IP100017283 | 661  | 666  | cdc2+PKA->cdc2                           | unsp+PKG->unsp+PKG+cdc2                  |                            | 688   | KLf5     | niqprvynrSnpdlekrrih   |
| IP100017283 | 664  | 666  | cdc2+PKA->cdc2                           | cdc2+PKA->cdc2                           |                            | 688   | KLf5     | niqprvynrSnpdlekrrih   |
| IP100017283 | 775  | 774  | unsp->                                   | cdc2+PKA->cdc2                           |                            | 688   | KLf5     | niqprvynrSnpdlekrrih   |
| IP100017292 | 19   | 23   | unsp+PKC->PKC                            | unsp->                                   |                            | 688   | KLf5     | niqprvynrSnpdlekrrih   |
| IP100017292 | 49   | 40   | unsp->PKC+cdc2                           | unsp->                                   |                            | 688   | KLf5     | niqprvynrSnpdlekrrih   |
| IP100017292 | 49   | 45   | unsp+PKC+CKI->unsp+CKI                   | unsp+PKC->PKC                            |                            | 688   | KLf5     | niqprvynrSnpdlekrrih   |
| IP100017292 | 49   | 47   | unsp+CKI+PKC->unsp+CKI                   | unsp+PKC+CKI->unsp+CKI                   |                            | 688   | KLf5     | niqpr                  |

Table S3

|             |     |     |                                           |                                          |                         |       |           |                        |
|-------------|-----|-----|-------------------------------------------|------------------------------------------|-------------------------|-------|-----------|------------------------|
| IP100017297 | 146 | 150 | unsp+PKA+RSK->unsp+PKA                    | unsp+PKA+RSK->unsp                       | PhosphoSite             | 9782  | MATR3     | qillqkrrrTeegptlsygr   |
| IP100017297 | 473 | 471 | unsp+ATM+PKC->ATM                         | unsp+ATM+PKC->ATM+DNAPK                  |                         | 9782  | MATR3     | vfgprvrvhISkykrikkpe   |
| IP100017297 | 571 | 569 | unsp+PKC->PKC                             | unsp+PKC->                               |                         | 9782  | MATR3     | fggrcvkdISkykklvri     |
| IP100017303 | 555 | 552 | PKC->                                     | PKC->                                    |                         | 4436  | MSH2      | vdqngkvkfTnsktlsnee    |
| IP100017303 | 555 | 554 |                                           | PKA->ATM+DNAPK                           |                         | 4436  | MSH2      | iqkngyktfISktslsneet   |
| IP100017303 | 555 | 558 | unsp+CKII->CKII                           | unsp+CKII->CKII                          |                         | 4436  | MSH2      | gvkfnsdISneeeytknkt    |
| IP100017305 | 75  | 72  | ->PKA                                     |                                          | Uniprot PhosphoSite     | 6195  | RP56KA1   | fellkvlgvgSfgkvfvrkv   |
| IP100017344 | 22  | 16  | unsp->unsp+cdc2                           | unsp->unsp+cdc2                          |                         | 5869  | RAB5B     | tarpngopqqaSkicqkvlvl  |
| IP100017381 | 6   | 9   | ->cdc2                                    | ->cdc2                                   |                         | 5984  | RFC4      | --mqafikgtSistkpltkdrg |
| IP100017381 | 6   | 11  | unsp+PKC->PKC                             |                                          |                         | 5984  | RFC4      | mqafikgtSistkpltkdrg   |
| IP100017381 | 13  | 9   | ->unsp+PKA+CaM-II                         | ->unsp                                   |                         | 5984  | RFC4      | --mqafikgtSistkpltkdrg |
| IP100017381 | 13  | 11  | unsp+PKC->cdc2                            | unsp+PKC->                               |                         | 5984  | RFC4      | mqafikgtSistkpltkdrg   |
| IP100017381 | 13  | 12  | PKC->DNAPK                                | PKC->DNAPK                               |                         | 5984  | RFC4      | qafikgtSistkpltkdrg    |
| IP100017381 | 13  | 17  | unsp->                                    |                                          |                         | 5984  | RFC4      | gtsiskppltkdrgvvaasag  |
| IP100017412 | 163 | 162 | unsp->                                    | ->DNAPK                                  |                         | 5982  | RFC2      | qalrtmeiySktrfalsacn   |
| IP100017412 | 163 | 164 | PKC->PKC+cdc2                             | PKC->unsp+PKC+cdc2                       |                         | 5982  | RFC2      | lrrtmeiySkTrfalacnas   |
| IP100017412 | 163 | 165 |                                           | ->unsp                                   |                         | 5982  | RFC2      | rrrtmeiySkTrfalacnasd  |
| IP100017412 | 304 | 305 | ->PKC                                     | ->PKC                                    |                         | 5982  | RFC2      | iignfrvckTfqmaeyklie   |
| IP100017448 | 81  | 80  |                                           | ->ATM+DNAPK                              |                         | 6227  | RP521     | lrlakadgivSknf-----    |
| IP100017450 | 407 | 398 | ->cdc2                                    |                                          |                         | 2962  | GTFF2F1   | gtpsaeggstSsttraaaskl  |
| IP100017450 | 407 | 406 | unsp+CKI+PKC+cdc2->CKI+cdc2               | unsp+CKI+PKC+cdc2->unsp+DNAPK            |                         | 2962  | GTFF2F1   | ststtraaaSKlegokrvse   |
| IP100017451 | 55  | 58  | PKC->                                     |                                          |                         | 10291 | SF3A1     | evrmvdktaSfvarnpgefe   |
| IP100017469 | 247 | 243 | unsp+PKC+CKII->unsp+CKII                  | unsp+PKC+CKII->unsp+CKII                 |                         | 6697  | SPR       | dckvsaqklISkleglenvkk  |
| IP100017592 | 597 | 591 | unsp+PKC+CKII->unsp+CKII                  | unsp+PKC+CKII->unsp                      |                         | 3954  | LETM1     | edlgeikkeISktgeekyvee  |
| IP100017592 | 597 | 602 | unsp->                                    | unsp->                                   |                         | 3954  | LETM1     | ktgeekyveeSkaskrtkrv   |
| IP100017596 | 60  | 55  | PKC->                                     | PKC->                                    |                         | 22919 | MAPRE1    | cqfmdmlfpgSialkxkvkfa  |
| IP100017596 | 66  | 71  |                                           | unsp+EGFR->unsp                          |                         | 22919 | MAPRE1    | vkfqakleheYiqnfilqag   |
| IP100017617 | 32  | 24  | ->PKA                                     |                                          |                         | 1655  | DDX5      | rgfgaprggSragplsgkfk   |
| IP100017617 | 32  | 30  | unsp+PKC->PKC                             | unsp+PKC->PKC                            |                         | 1655  | DDX5      | rfggagraplSgkfgnpgnek  |
| IP100017659 | 81  | 83  | unsp->                                    |                                          | Uniprot                 | 92241 | RCSd1     | shppkfvkksSpilleqianl  |
| IP100017704 | 102 | 94  | unsp+PKC+RSK->unsp+PKC                    |                                          | Uniprot                 | 23406 | COTL1     | envsgsrnhdSgkgtklvkv   |
| IP100017704 | 102 | 99  | unsp->                                    |                                          |                         | 23406 | COTL1     | lqraqtdtkTlkyevvqnfa   |
| IP100017704 | 110 | 115 | unsp+CKII->CKII                           | unsp+CKII->CKII                          | iprot PHOSPHO PhosphoSi | 23406 | COTL1     | vqnafakeYfISdrkeleedfi |
| IP100017704 | 126 | 127 | ->CKII                                    | ->CKII                                   |                         | 23406 | COTL1     | rkeleedfIkSeikkgagany  |
| IP100017855 | 520 | 513 | INSR+unsp->unsp                           |                                          | PhosphoSite             | 50    | AC02      | gtkfnpetdYltgdgkfkfr   |
| IP100017855 | 520 | 515 | CKI->                                     |                                          |                         | 50    | AC02      | lkfnpetdYltgdgkfkfr    |
| IP100018027 | 664 | 662 | unsp+PKC->                                | unsp+PKC->                               |                         | 55109 | AGGF1     | qlrrthlaglTgkpsfsvdh   |
| IP100018120 | 175 | 171 | PKC->RSK                                  | PKC->unsp                                |                         | 7818  | DAP3      | vvknrcdlqgSsynkqrfdap  |
| IP100018120 | 175 | 172 | unsp+cdc2->                               | unsp+cdc2->unsp                          |                         | 7818  | DAP3      | vkncrdllqgSynkqrfdap   |
| IP100018140 | 363 | 359 | ATM+CKI+cdc2->ATM+CKI                     | ATM+CKI+cdc2->unsp+CKI+cdc2              |                         | 10492 | SYNCRBP   | vtseeliekagSfgklenvkk  |
| IP100018146 | 49  | 45  | PKC->PKA                                  |                                          |                         | 10971 | YWHAQ     | elsneemlISvayknvvggr   |
| IP100018146 | 68  | 63  | unsp+PKG+cdc2+RSK->unsp+PKG+PKA+RSK       | unsp+PKG+cdc2+RSK->unsp+PKG+PKA+cdc2+RSK |                         | 10971 | YWHAQ     | grrsarvrisSieqktdtsd   |
| IP100018146 | 68  | 64  | PKC->                                     |                                          |                         | 10971 | YWHAQ     | grrsarvrisSieqktdtsd   |
| IP100018146 | 68  | 71  | unsp+PKC->unsp+PKC+cdc2                   | unsp+PKC->unsp+PKC+cdc2                  |                         | 10971 | YWHAQ     | vissieqktdTsdiklqlikd  |
| IP100018146 | 68  | 72  | unsp+PKC->unsp                            |                                          |                         | 10971 | YWHAQ     | issieqktdTsdiklqlikd   |
| IP100018146 | 115 | 110 | PKC->                                     |                                          |                         | 10971 | YWHAQ     | ldkylilanaTnpskvfylik  |
| IP100018146 | 115 | 114 |                                           | ->ATM+DNAPK                              |                         | 10971 | YWHAQ     | ylilanaTnpeSkvfylikmgd |
| IP100018146 | 115 | 118 | unsp->                                    | unsp->                                   |                         | 10971 | YWHAQ     | natnpskvYfIkmlmgdyfry  |
| IP100018146 | 120 | 118 | unsp->                                    |                                          |                         | 10971 | YWHAQ     | natnpskvYfIkmlmgdyfry  |
| IP100018206 | 150 | 152 | PKC->PKC                                  | PKC->                                    |                         | 2806  | GOT2      | asfkrfrfISvdfgkptw     |
| IP100018206 | 296 | 292 | PKC->                                     | PKC->                                    |                         | 2806  | GOT2      | glygervgafTmckdadaeak  |
| IP100018206 | 363 | 360 | PKC+cdc2->                                | PKC+cdc2->PKC                            |                         | 2806  | GOT2      | rigmrtqlvSnllkgessth   |
| IP100018206 | 363 | 367 | PKA->                                     |                                          |                         | 2806  | GOT2      | qlvsnllkqgSthnwqhitdq  |
| IP100018206 | 396 | 399 | unsp->cdc2                                | unsp->cdc2                               |                         | 2806  | GOT2      | eqverlikerSiymtdgris   |
| IP100018206 | 404 | 399 | unsp->                                    |                                          |                         | 2806  | GOT2      | eqverlikerSiymtdgris   |
| IP100018206 | 404 | 401 |                                           |                                          |                         | 2806  | GOT2      | verlikerSiymtdgrisva   |
| IP100018206 | 404 | 403 | PKC->                                     | unsp->EGFR                               | Uniprot PhosphoSite     | 2806  | GOT2      | rikerfesyYmtkdgrisva   |
| IP100018206 | 404 | 409 | unsp+PKA->PKA                             | PKC->DNAPK                               |                         | 2806  | GOT2      | siymtdkgrISvaykssnvg   |
| IP100018214 | 40  | 42  | unsp+cdc2->PKC+cdc2                       | unsp+PKA->PKA                            |                         | 4149  | MAX       | erkrrdhdIShrlsdvspg    |
| IP100018214 | 40  | 45  | unsp+PKC->unsp                            | unsp+PKC->unsp                           |                         | 4149  | MAX       | rrdhkdsfHSlrdsvsplog   |
| IP100018214 | 66  | 70  | unsp+EGFR->EGFR                           |                                          | PhosphoSite             | 4149  | MAX       | raqldkateYiqymrrnkht   |
| IP100018214 | 153 | 144 | unsp+CKI+CKII->unsp+CKI+cdc2+CKII         |                                          |                         | 4149  | MAX       | fdgsgdsesseSepeegpsrkk |
| IP100018251 | 31  | 29  | unsp->unsp+cdc2                           | unsp->unsp+GSK3                          | Uniprot                 | 10499 | NCOA2     | rkecpdqlgpSpkrntekmr   |
| IP100018251 | 636 | 635 | unsp+PKC->unsp                            | unsp+PKC->ATM+unsp                       |                         | 10499 | NCOA2     | radggsrhdISkggtklqll   |
| IP100018251 | 636 | 639 | PKC->                                     | unsp+PKC->unsp                           |                         | 10499 | NCOA2     | qsrlndskggtIKlqlitks   |
| IP100018251 | 640 | 635 | unsp+PKC->unsp                            | unsp+PKC->unsp                           |                         | 10499 | NCOA2     | qsrlndskggtIKlqlitks   |
| IP100018251 | 640 | 639 | PKC->PKA                                  | PKC->                                    |                         | 10499 | NCOA2     | qsrlndskggtIKlqlitks   |
| IP100018251 | 640 | 647 | ->cdc2                                    |                                          |                         | 10499 | NCOA2     | gqtklqlitTksdamesspl   |
| IP100018251 | 780 | 777 | unsp->                                    | unsp->                                   |                         | 10499 | NCOA2     | erldsktdpaSntklamkte   |
| IP100018251 | 780 | 779 | ->DNAPK                                   | ->DNAPK                                  |                         | 10499 | NCOA2     | ldsktdpasnTklamkteke   |
| IP100018251 | 788 | 786 | unsp+PKC+CKII->unsp+CKII                  | unsp+PKC+CKII->unsp+CKII                 |                         | 10499 | NCOA2     | asntklamTkeemsfepg     |
| IP100018251 | 788 | 792 | unsp+CKI->unsp+CKI+CKII                   |                                          |                         | 10499 | NCOA2     | iamktekeemSfepgdpgsse  |
| IP100018278 | 5   | 10  | unsp+PKC->unsp                            | unsp+PKC->unsp                           |                         | 94239 | H2AFV     | --maggkagkdISgakakavsr |
| IP100018278 | 8   | 10  | unsp+PKC->unsp                            | unsp+PKC->unsp                           |                         | 94239 | H2AFV     | --maggkagkdISgakakavsr |
| IP100018278 | 12  | 10  | unsp+PKC->unsp+PKA                        | unsp+PKC->unsp                           |                         | 94239 | H2AFV     | --maggkagkdISgakakavsr |
| IP100018278 | 14  | 10  | unsp+PKA->PKA                             | unsp+PKA->PKA                            |                         | 94239 | H2AFV     | --maggkagkdISgakakavsr |
| IP100018278 | 14  | 19  | unsp+PKA->PKA                             | unsp+PKA->PKA                            |                         | 94239 | H2AFV     | dsgakakavSrsgagrlgfk   |
| IP100018279 | 247 | 241 | unsp+GSK3+cdk5+p38MAPK->unsp+GSK3+p38MAPK |                                          |                         | 50509 | COL5A3    | atvapogepeTprprkrqgkq  |
| IP100018349 | 220 | 223 | INSR->                                    | INSR->                                   |                         | 4173  | MCM4      | ehiksfdknlYrqilyspqev  |
| IP100018349 | 220 | 228 | PKC+PKA->PKC                              | PKC+PKA->PKC                             |                         | 4173  | MCM4      | fdknlYrqilSyqgevipitfd |
| IP100018349 | 450 | 453 | unsp+cdc2->cdc2                           | unsp+cdc2->cdc2                          |                         | 4173  | MCM4      | ekrvellkeISrkdpiyerla  |
| IP100018349 | 627 | 629 | PKG->PKG                                  | PKG->unsp                                |                         | 4173  | MCM4      | piesqwnpkkTtienqlpht   |
| IP100018350 | 392 | 398 | p38MAPK->cdc2+p38MAPK                     | p38MAPK->cdc2+p38MAPK                    |                         | 4174  | MCM5      | sqlikvekeSpigvysgkq    |
| IP100018350 | 396 | 398 | p38MAPK->GSK3+p38MAPK                     | p38MAPK->GSK3+p38MAPK                    |                         | 4174  | MCM5      | sqlikvekeSpigvysgkq    |
| IP100018350 | 396 | 405 | unsp+PKC->unsp+PKC+cdc2                   | unsp+PKC->unsp+PKC+cdc2                  |                         | 4174  | MCM5      | ekcspigvysSgkgsaaglt   |
| IP100018350 | 696 | 690 | unsp+CKI->unsp                            |                                          |                         | 4174  | MCM5      | krrfaigsqvSehsikdftfk  |
| IP100018350 | 696 | 693 | unsp+CKI->                                |                                          |                         | 4174  | MCM5      | faigsqvsehSiikdftkqky  |
| IP100018350 | 696 | 703 | unsp->INSR+unsp                           |                                          |                         | 4174  | MCM5      | siikdftkqkyYpehahkvlg  |
| IP100018352 | 195 | 189 | CKI+CKII->CKII                            | CKI+CKII->CKII                           |                         | 7345  | UCHL1     | mpfpvnhgasSedtlldaak   |
| IP100018352 | 195 | 192 | unsp->                                    |                                          |                         | 7345  | UCHL1     | pvnhgassedTilkdaakvcr  |
| IP100018402 | 463 | 468 | unsp+cdc2+DNAPK->cdc2+DNAPK               | unsp+cdc2+DNAPK->cdc2+DNAPK              |                         | 6905  | TBCE      | qkvleklpgSmbtkvkvgl    |
| IP100018452 | 171 | 178 | ->cdc2                                    |                                          |                         | 8904  | CNPE1     | gdgkwhlYrSevknminpt    |
| IP100018465 | 172 | 169 | unsp->ATM                                 | unsp->ATM+unsp                           |                         | 10574 | CCT7      | amtalaskISoqakfakmv    |
| IP100018465 | 217 | 219 | PKG->PKG                                  | PKG->                                    |                         | 10574 | CCT7      | qlvgavfaktTSyagfemnp   |
| IP100018465 | 217 | 221 | unsp+PKC->                                |                                          |                         | 10574 | CCT7      | vagvafaktTSyagfemqpk   |
| IP100018534 | 6   | 7   | unsp->cdc2                                | unsp->cdc2                               |                         | 8340  | HIST1H2BL | ----mpelakSapapkggskk  |
| IP100018534 | 12  | 7   | unsp->                                    | unsp->                                   |                         | 8340  | HIST1H2BL | ----mpelakSapapkggskk  |
| IP100018534 | 12  | 15  | unsp+PKC->PKC                             | unsp+PKC->PKC                            | Uniprot                 | 8340  | HIST1H2BL | aksapapkggSkkavtkaaqk  |
| IP100018534 | 13  | 7   |                                           | unsp->unsp+cdc2                          |                         | 8340  | HIST1H2BL | ----mpelakSapapkggskk  |
| IP100018534 | 13  | 15  | unsp+PKC->PKC                             |                                          | Uniprot                 | 8340  | HIST1H2BL | aksapapkggSkkavtkaaqk  |
| IP100018534 | 16  | 7   | unsp->unsp+cdc2                           |                                          |                         | 8340  | HIST1H2BL | ----mpelakSapapkggskk  |
| IP100018534 | 16  | 15  | unsp+PKC->unsp+PKC+PKA                    | unsp+PKC->ATM+unsp+PKC+DNAPK             | Uniprot                 | 8340  | HIST1H2BL | aksapapkggSkkavtkaaqk  |
| IP100018534 | 17  | 15  | unsp+PKC->PKC+PKA                         | unsp+PKC->PKC+PKA                        | Uniprot                 | 8340  | HIST1H2BL | aksapapkggSkkavtkaaqk  |
| IP100018534 | 21  | 15  | unsp+PKC->unsp+PKC+PKA                    | unsp+PKC->unsp+PKC+PKA                   | Uniprot                 | 8340  | HIST1H2BL | aksapapkggSkkavtkaaqk  |
| IP100018534 | 21  | 20  |                                           | PKC->PKC+DNAPK                           |                         | 8340  | HIST1H2BL | apkggskkavTKaqqdkgkr   |
| IP100018534 | 109 | 113 | unsp->                                    |                                          |                         | 8340  | HIST1H2BL | lpgelakhavSegtkavtkyt  |
| IP100018534 | 121 | 120 |                                           | ->ATM+DNAPK                              |                         | 8340  | HIST1H2BL | havsegtkavTKytsk----   |
| IP100018534 | 121 | 123 |                                           | PKC->                                    |                         | 8340  | HIST1H2BL | segtkavtkytTssk-----   |
| IP100018627 | 140 | 139 | INSR+unsp->unsp                           |                                          |                         | 80218 | NAA50     | feieteknYKrieapadahv   |
| IP100018755 | 82  | 77  | PKC->                                     |                                          |                         | 1E+08 | HMGBl110  | dkshyerenkTyppgetekh   |
| IP100018755 | 82  | 78  | unsp->INSR+unsp                           | unsp->INSR+unsp+EGFR                     |                         | 1E+08 | HMGBl110  | kahyeremkTgppgetekkk   |
| IP100018755 | 157 | 155 | unsp->                                    |                                          |                         | 1E+08 | HMGBl110  | ekkaakillekYekdiaayrak |
| IP100018768 | 187 | 190 | PKC->                                     |                                          |                         | 7247  | TSN       | grflnlnkdSlrkrYdgiky   |
| IP100018768 | 199 | 200 | unsp->                                    | unsp->                                   |                         | 7247  | TSN       | slrkrydgikYdvkveevvy   |
| IP100018823 | 512 | 509 | unsp+cdc2->                               | unsp+cdc2->unsp                          |                         | 80314 | EPIC1     | ntsetnsdkSfksdlsqilv   |
| IP100018823 | 512 | 511 | unsp->                                    | unsp->ATM+unsp+DNAPK                     |                         | 80314 | EPIC1     | setnsdksfksdlsqilvni   |
| IP100018842 | 33  | 27  | unsp->unsp+PKA                            | unsp->unsp+PKA                           |                         | 9324  | HMGN3     | kvtkqeptrrSarisaapapp  |
| IP100018842 | 90  | 93  | unsp+PKC+CKII->unsp+CKII                  |                                          | Uniprot PhosphoSite     | 9324  | HMGN3     | tkaaeaqkteSvdnege----  |
| IP100019148 | 241 | 246 | PKC->                                     | PKC->                                    |                         | 3476  | IGBP1     | errpvykpfIrmmagqgfg    |
| IP100019226 | 481 | 479 | unsp->                                    | unsp->                                   |                         | 10902 | BRD8      | kpvlpapemTVkqerldfee   |
| IP100019353 | 6   | 2   | PKC->                                     |                                          |                         | 55750 | AGK       | -----mTvffktlrnhw      |
| IP100019353 | 6   | 7   | unsp+PKC->unsp+CKI+PKC                    |                                          |                         | 55750 | AGK       | -----mtvffktlrnhwkkta  |
| IP100019380 | 204 | 199 | CKII->                                    |                                          |                         | 4686  | NCBP1     | daemdrifanTesyikrrqkt  |
| IP100019380 | 204 | 202 |                                           | ->unsp                                   |                         | 4686  | NCBP1     | mdrifantesYikrrqkthvp  |
| IP100019380 | 204 | 209 | unsp+PKG+PKA->unsp+CaM-II                 | unsp+PKG+PKA->unsp+PKG                   |                         | 4686  | NCBP1     | tesyikrrqkThvpmqlqvta  |
| IP100019400 | 58  | 55  | PKC->                                     |                                          |                         |       |           |                        |

Table S3

|             |      |      |                                          |                                           |                     |        |           |                        |
|-------------|------|------|------------------------------------------|-------------------------------------------|---------------------|--------|-----------|------------------------|
| IP100019472 | 537  | 539  | unsp->                                   | unsp->                                    | PhosphoSite         | 6510   | SLC1A5    | gdatvasekeSvm-----     |
| IP100019502 | 74   | 81   | unsp+PKG->unsp+PKG+PKA                   |                                           |                     | 4627   | MYH9      | diqkmnpkfSkvedmaeltc   |
| IP100019502 | 102  | 105  | INSR->                                   | INSR->                                    |                     | 4627   | MYH9      | asvlnhikerYysgliytysg  |
| IP100019502 | 545  | 541  | unsp+PKG->unsp+PKG+PKA                   |                                           |                     | 4627   | MYH9      | ecwfpkatokdSfvekvrmqeq |
| IP100019502 | 1301 | 1300 | PKC->                                    | PKC->                                     |                     | 4627   | MYH9      | sqsdskssdYkldfaleqsl   |
| IP100019502 | 1301 | 1304 | unsp->                                   | unsp->                                    |                     | 4627   | MYH9      | skskskldfSsaleqldgtq   |
| IP100019502 | 1301 | 1308 | PKC->ATM+PKC                             |                                           |                     | 4627   | MYH9      | kttkdSsaleSqldgtqell   |
| IP100019502 | 1357 | 1361 | PKC->                                    |                                           |                     | 4627   | MYH9      | akhnlekqiaTlhaqvadmkk  |
| IP100019502 | 1404 | 1398 |                                          | ATM+unsp+CKII->ATM+unsp                   |                     | 4627   | MYH9      | rklqldlelSGsrheekvaay  |
| IP100019502 | 1404 | 1408 | EGFR->                                   |                                           | Uniprot PhosphoSite | 4627   | MYH9      | srqheekvaaYdklektktrl  |
| IP100019502 | 1410 | 1408 | EGFR->                                   |                                           | Uniprot PhosphoSite | 4627   | MYH9      | srqheekvaaYdklektktrl  |
| IP100019502 | 1459 | 1457 | unsp->                                   | unsp->                                    |                     | 4627   | MYH9      | dqlaeektiSakyaeerdra   |
| IP100019502 | 1828 | 1827 |                                          | unsp->                                    |                     | 4627   | MYH9      | aqleedldneI keraqaackv |
| IP100019548 | 20   | 25   | unsp+PKC+PKA->PKC                        |                                           |                     | 4087   | SMAD2     | llgwkkSaggsSgaggggcnq  |
| IP100019600 | 72   | 75   | unsp+EGFR->SRC+unsp+EGFR                 | unsp+PKC+PKA->PKC                         |                     | 7336   | UBE2V2    | ysilevecpkIpeappsvrfv  |
| IP100019755 | 122  | 125  | unsp->GSK3                               | unsp->                                    |                     | 9446   | GSTO1     | mlelfskvplSvlgsvfrsqn  |
| IP100019755 | 143  | 139  |                                          | unsp->unsp+EGFR                           |                     | 9446   | GSTO1     | sfrsqnkedYagikeefrie   |
| IP100019755 | 160  | 158  | unsp+PKC->                               | unsp+PKC->                                |                     | 9446   | GSTO1     | keftkleevITnktttffggn  |
| IP100019812 | 40   | 38   |                                          | ->unsp                                    |                     | 5536   | PPP5C     | aeeltqandYfkakdyenai   |
| IP100019812 | 40   | 44   | unsp+EGFR->                              |                                           |                     | 5536   | PPP5C     | qandYfkadYenaikfysqa   |
| IP100019812 | 42   | 38   |                                          | ->EGFR                                    |                     | 5536   | PPP5C     | aeeltqandYfkakdyenai   |
| IP100019812 | 42   | 44   | unsp+EGFR->unsp                          |                                           |                     | 5536   | PPP5C     | qandYfkadYenaikfysqa   |
| IP100019848 | 27   | 293  | PKA->                                    | PKA->                                     |                     | 3054   | HCF1      | vathelkwkITnlaicldt    |
| IP100019848 | 813  | 808  | PKC->                                    |                                           |                     | 3054   | HCF1      | ittkvmtsgTgapaakltav   |
| IP100019848 | 2005 | 2003 | unsp+PKC->                               | unsp+PKC->                                |                     | 3054   | HCF1      | patqvrvlqetSkdssgtkpa  |
| IP100019848 | 2005 | 2004 |                                          | CKI->ATM+CKI+DNAPK                        |                     | 3054   | HCF1      | atqrvrqlqetSkdssgtkpan |
| IP100019848 | 2005 | 2007 | unsp->CKI                                | unsp->unsp+CKI                            | Uniprot             | 3054   | HCF1      | vrwlqetSkdSsgtkpankrp  |
| IP100019868 | 15   | 17   | unsp+PKA+cdc2->cdc2                      | unsp+PKA+cdc2->unsp+cdc2                  |                     | 2706   | GJB2      | qtllgvgvnhkStsigkiwltv |
| IP100019868 | 15   | 18   | PKC->                                    |                                           |                     | 2706   | GJB2      | tilggvnhkStsigkiwltv   |
| IP100019869 | 27   | 21   | unsp+CKI+PKG+CKII+PKA->unsp+PKG+CKII+PKA | unsp+CKI+PKG+CKII+PKA->unsp+PKG+CKII+PKA  |                     | 6273   | S100A2    | avivttthkySceqgdkrfks  |
| IP100019869 | 27   | 21   |                                          | unsp+PKC+PKG+CKII+PKA->unsp+PKC+cdc2+CKII |                     | 6273   | S100A2    | scqeggdvkvSKgmelelkh   |
| IP100019888 | 126  | 121  | cdc2->PKA+cdc2                           |                                           |                     | 7915   | ALDH5A1   | nrvreSakersSlrkfwynlm  |
| IP100019888 | 126  | 122  | unsp+PKC->unsp+PKA                       | unsp+PKC->unsp+PKA                        |                     | 7915   | ALDH5A1   | wrevSakersSlrkfwynlm   |
| IP100019912 | 139  | 143  | unsp->                                   |                                           |                     | 3295   | HSD17B4   | aawehmkqkYgrimtsass    |
| IP100019912 | 140  | 143  |                                          | unsp->                                    |                     | 3295   | HSD17B4   | aawehmkqkYgrimtsass    |
| IP100019912 | 663  | 665  | ->PKC                                    |                                           |                     | 3295   | HSD17B4   | tkggnigakwTldlsgsgkv   |
| IP100019912 | 669  | 672  | unsp+PKC->PKC                            | unsp+PKC->PKC                             |                     | 3295   | HSD17B4   | akwtldlsgSgkvvyagpakg  |
| IP100019912 | 707  | 711  | PKC->                                    |                                           |                     | 3295   | HSD17B4   | klidpqkaffSgrikargnim  |
| IP100019927 | 204  | 203  | cdc2->PKA+cdc2                           | cdc2->cdc2+DNAPK                          |                     | 5713   | PSMD7     | nqvgvlgknISklidrsyle   |
| IP100019927 | 214  | 217  | unsp+PKC->                               | unsp+PKC->PKC                             |                     | 5713   | PSMD7     | dirzylekvvaTgklnjnqj   |
| IP100019981 | 52   | 48   | ->PKA                                    |                                           |                     | 2961   | GTf2E2    | kkktvehgsgSgskqnsdhn   |
| IP100019981 | 52   | 49   | PKC->                                    |                                           |                     | 2961   | GTf2E2    | kkktvehgsgSgskqnsdhn   |
| IP100019981 | 52   | 51   | unsp+cdc2->unsp+cdc2+DNAPK               | unsp+cdc2->ATM+unsp+cdc2+DNAPK            |                     | 2961   | GTf2E2    | tkvehgsgsgSkqnsdhsngs  |
| IP100019981 | 52   | 55   | unsp->unsp+cdc2                          | unsp->unsp+cdc2                           |                     | 2961   | GTf2E2    | hggsgsgskqnsdhsngsfnlk |
| IP100019992 | 407  | 403  | PKC->                                    | PKC->                                     |                     | 4603   | MYBL1     | isdaaaspikStpvklmriqh  |
| IP100019992 | 407  | 404  | unsp+cdk5+p38MAPK->unsp+p38MAPK          |                                           |                     | 4603   | MYBL1     | sdaaaspikStpvklmriqh   |
| IP100020008 | 48   | 46   | PKC->                                    | PKC->                                     |                     | 4738   | NEDD8     | ippqqqrilySgkqmmdektk  |
| IP100020021 | 326  | 328  | unsp->unsp+PKC                           |                                           |                     | 7913   | DEK       | kpptdeelekeITkklaslanI |
| IP100020039 | 286  | 280  | INSR+unsp->unsp                          | INSR+unsp->unsp                           |                     | 1538   | CYL1C1    | qnksknylskYtkktdtkkk   |
| IP100020039 | 286  | 281  | PKC->                                    |                                           |                     | 1538   | CYL1C1    | nnskysilykYtkktdtkknk  |
| IP100020039 | 286  | 283  | unsp+EGFR->EGFR                          | unsp+EGFR->EGFR                           |                     | 1538   | CYL1C1    | sknysilykYtkktdtkknk   |
| IP100020039 | 286  | 284  | unsp+PKC+PKG->unsp+PKC                   | unsp+PKC+PKG->unsp+PKC                    |                     | 1538   | CYL1C1    | knysilykYtkktdtkknk    |
| IP100020042 | 238  | 233  | PKC->                                    | PKC->                                     |                     | 5704   | PSMC4     | ttaafrirvgSefvqkyllge  |
| IP100020042 | 401  | 403  |                                          | unsp->unsp+EGFR                           |                     | 5704   | PSMC4     | ivlakdfekaYktvikdeq    |
| IP100020042 | 418  | 417  | unsp->                                   |                                           | PhosphoSite         | 5704   | PSMC4     | ikkdeqehfYk-----       |
| IP100020101 | 6    | 7    |                                          | unsp->                                    | Uniprot             | 8346   | HIST1H2B1 | ----mpepakSapapkksgskk |
| IP100020101 | 12   | 7    | unsp->                                   | unsp->                                    | Uniprot             | 8346   | HIST1H2B1 | ----mpepakSapapkksgskk |
| IP100020101 | 12   | 15   | unsp+PKC->PKC                            | unsp+PKC->PKC                             | Uniprot PHOsphoELM  | 8346   | HIST1H2B1 | aksapapkkSgkavtkaaqk   |
| IP100020101 | 13   | 15   | unsp+PKC->PKC                            |                                           | Uniprot PHOsphoELM  | 8346   | HIST1H2B1 | aksapapkkSgkavtkaaqk   |
| IP100020101 | 16   | 15   | unsp+PKC->unsp+PKC+PKA                   | unsp+PKC->ATM+unsp+PKC+DNAPK              | Uniprot PHOsphoELM  | 8346   | HIST1H2B1 | aksapapkkSgkavtkaaqk   |
| IP100020101 | 17   | 15   | unsp+PKC->PKC+PKA                        | unsp+PKC->PKC+PKA                         | Uniprot PHOsphoELM  | 8346   | HIST1H2B1 | aksapapkkSgkavtkaaqk   |
| IP100020101 | 21   | 15   | unsp+PKC->unsp+PKC+PKA                   | unsp+PKC->unsp+PKC+PKA                    | Uniprot PHOsphoELM  | 8346   | HIST1H2B1 | aksapapkkSgkavtkaaqk   |
| IP100020101 | 21   | 20   |                                          | PKC->PKC+DNAPK                            |                     | 8346   | HIST1H2B1 | apkksgskavTkaqkdgklkr  |
| IP100020101 | 109  | 113  | unsp->                                   |                                           |                     | 8346   | HIST1H2B1 | lpgelakhavSvsgtkavtykt |
| IP100020127 | 163  | 154  |                                          | PKC+cdc2->PKC                             |                     | 6117   | RPA1      | pqnsgsgmsTvsakygaskt   |
| IP100020127 | 163  | 162  | ->PKA                                    | ->ATM+DNAPK                               |                     | 6117   | RPA1      | gstvskaygaSkfTgkaagps  |
| IP100020127 | 167  | 162  | ->PKA                                    |                                           |                     | 6117   | RPA1      | gstvskaygaSkfTgkaagps  |
| IP100020127 | 167  | 164  | PKC->                                    | PKC->                                     |                     | 6117   | RPA1      | tsvkaygaSkTfTgkaagpsls |
| IP100020127 | 259  | 255  |                                          | ->EGFR                                    |                     | 6117   | RPA1      | fflievknvYfyskgtklia   |
| IP100020127 | 259  | 258  | PKC+CKI->CKI+PKA                         | PKC+CKI->ATM+CKI+DNAPK                    |                     | 6117   | RPA1      | lievnkvyyfSkgtkliankq  |
| IP100020127 | 259  | 261  | unsp+PKC->PKC                            |                                           |                     | 6117   | RPA1      | vnkvyyfyskgTliankqfta  |
| IP100020416 | 708  | 711  | PKC->cdc2                                | PKC->PKC+CKII+cdc2                        |                     | 7174   | TPP2      | yrshfkyfclSlpekgtittea |
| IP100020416 | 883  | 878  | ->PKA                                    |                                           |                     | 7174   | TPP2      | gsqdayphqySlkiekgdyti  |
| IP100020416 | 883  | 886  | INSR+unsp+EGFR->EGFR                     | INSR+unsp+EGFR->unsp+EGFR                 |                     | 7174   | TPP2      | qyskilekgdYtirlirneq   |
| IP100020546 | 406  | 410  | PKA->                                    | PKA->cdc2                                 |                     | 55870  | ASH1L     | vnkldgkSgskfTgkaagps   |
| IP100020559 | 331  | 327  | PKC+cdc2->PKC                            |                                           | Uniprot             | 199870 | FAM76A    | reilkqaalSKkksksgsa    |
| IP100020559 | 331  | 329  | unsp+PKC->                               | unsp+PKC->                                |                     | 199870 | FAM76A    | llkqaalSKkksksgsa      |
| IP100020559 | 331  | 335  | unsp->                                   |                                           |                     | 199870 | FAM76A    | alskskkskSqaitsp----   |
| IP100020567 | 212  | 220  | PKC->PKC+cdc2                            |                                           |                     | 392    | ARHGAP1   | viklydfklsTqskpatapkp  |
| IP100020599 | 48   | 44   | ->unsp                                   | ->unsp                                    |                     | 811    | CALR      | tsrwieskhkSdfgkfvllsg  |
| IP100020599 | 48   | 52   | PKC->                                    |                                           |                     | 811    | CALR      | hksdfgkfvllSgkfygdeek  |
| IP100020599 | 48   | 53   | unsp+PKC->PKC                            | unsp+PKC->PKC                             |                     | 811    | CALR      | ksdfgkfvllSgkfygdeekd  |
| IP100020599 | 209  | 214  | unsp+CKII->CKII                          |                                           |                     | 811    | CALR      | ppkikldpdaSkpdedwerak  |
| IP100020602 | 97   | 93   |                                          | PKA->PKG+PKA                              |                     | 1459   | CSNK2A2   | vklienlrgTlniulidtyk   |
| IP100020602 | 97   | 101  | unsp+PKC->unsp                           |                                           |                     | 1459   | CSNK2A2   | gttniikldITkdpyvsktpa  |
| IP100020618 | 6    | 2    | PKC->                                    |                                           |                     | 8369   | HIST1H4G  | -----mSvrgkagkglg      |
| IP100020898 | 81   | 89   | unsp->unsp+cdc2                          |                                           |                     | 6197   | RPS6KA3   | fgkvflvikiSgsgardlyam  |
| IP100020906 | 49   | 46   | ->CKII                                   |                                           |                     | 3612   | IMPA1     | ksspdvltvaTdqkvekmlls  |
| IP100020956 | 44   | 40   | ->PKA                                    | ->PKG                                     |                     | 3068   | HDGF      | idempeaavkStankyqvfff  |
| IP100020956 | 44   | 41   | PKC+PKG->PKG                             |                                           |                     | 3068   | HDGF      | dempeaavkStankyqvfff   |
| IP100020956 | 44   | 45   | INSR->                                   |                                           |                     | 3068   | HDGF      | eaavkStankYqvfffghet   |
| IP100020965 | 60   | 65   | unsp->                                   | unsp->GSK3                                |                     | 7328   | UBE2H     | vdldpypPKSpisgfmnkif   |
| IP100020985 | 77   | 76   | unsp+PKC->ATM+unsp+PKA+DNAPK             | ->cdc2                                    |                     | 2033   | EP300     | tslmgvqdaaSkhkglselrl  |
| IP100020985 | 77   | 82   | ->cdc2                                   |                                           |                     | 2033   | EP300     | qdaaskhkgISellrsgsspn  |
| IP100020985 | 79   | 76   | unsp+PKC->                               |                                           |                     | 2033   | EP300     | tslmgvqdaaSkhkglselrl  |
| IP100020985 | 79   | 82   | ->cdc2                                   | ->cdc2                                    |                     | 2033   | EP300     | qdaaskhkgISellrsgsspn  |
| IP100020985 | 79   | 87   | ->cdc2                                   |                                           |                     | 2033   | EP300     | khkqlselrSgsspnlnmgv   |
| IP100020985 | 291  | 285  | GSK3+cdk5->GSK3                          | GSK3+cdk5->GSK3                           | Uniprot             | 2033   | EP300     | qtktlvsnnlSpfamdkkavp  |
| IP100020985 | 292  | 285  | GSK3+cdk5->GSK3+cdk5+p38MAPK             | GSK3+cdk5->GSK3                           | Uniprot             | 2033   | EP300     | qtktlvsnnlSpfamdkkavp  |
| IP100020985 | 373  | 371  | PKC->                                    |                                           |                     | 2033   | EP300     | vrqcnlphcrImknvlnhmt   |
| IP100020985 | 386  | 394  | PKC->                                    |                                           |                     | 2033   | EP300     | rvlnhlnhmtcqSgksqvahca |
| IP100020985 | 404  | 401  | PKC->                                    |                                           |                     | 2033   | EP300     | zhcassrqlSthwcnrhdic   |
| IP100020985 | 569  | 564  | PKC->                                    |                                           |                     | 2033   | EP300     | gmptaaqpsTgirkqwhed    |
| IP100020985 | 569  | 565  | PKC->                                    |                                           |                     | 2033   | EP300     | pmptaaqpsTgirkqwhedi   |
| IP100020985 | 636  | 638  |                                          | unsp->unsp+EGFR                           | PhosphoSite         | 2033   | EP300     | eyyhlaekiYkiqkelelekr  |
| IP100020985 | 1001 | 1000 | unsp+CKII->unsp+CKI+CKII                 | unsp+CKII->ATM+unsp+CKII+DNAPK            |                     | 2033   | EP300     | adtapediseSkvedcmest   |
| IP100020985 | 1024 | 1031 | unsp->unsp+cdc2                          | unsp->unsp+cdc2                           |                     | 2033   | EP300     | teikeeedapSstaqtsspp   |
| IP100020985 | 1045 | 1044 | unsp+PKC+PKG->unsp+PKC                   | unsp+PKC+PKG->ATM+unsp                    |                     | 2033   | EP300     | atqsspappgqSkkikfpeel  |
| IP100020985 | 1046 | 1044 | unsp+PKC+PKG->                           | unsp+PKC+PKG->ATM+unsp                    |                     | 2033   | EP300     | atqsspappgqSkkikfpeel  |
| IP100020985 | 1047 | 1044 | unsp+PKC+PKG->                           |                                           |                     | 2033   | EP300     | atqsspappgqSkkikfpeel  |
| IP100020985 | 1094 | 1095 | unsp+GSK3+cdk5->unsp+cdk5                | unsp+GSK3+cdk5->unsp+cdk5                 |                     | 2033   | EP300     | gipdyfdvlgSgmldstkrk   |
| IP100020985 | 1144 | 1136 | unsp+PKG+PKA+RSK->unsp+PKG+cdc2+PKA      |                                           |                     | 2033   | EP300     | nnawlynrktSrvlykcskls  |
| IP100020985 | 1144 | 1143 |                                          | ->ATM                                     |                     | 2033   | EP300     | rktsvrykyrCsklsvfeqei  |
| IP100020985 | 1167 | 1171 | unsp->cdc5                               | unsp->unsp+cdc5                           |                     | 2033   | EP300     | gyccrgklefSpqtlccyqkg  |
| IP100020985 | 1180 | 1174 | CKI->                                    | CKI->                                     |                     | 2033   | EP300     | cgrrklefsgqTlccyqkqlct |
| IP100020985 | 1228 | 1224 | PKC->                                    | PKC->                                     |                     | 2033   | EP300     | slgddpsapqTlnkeqfskr   |
| IP100020985 | 1228 | 1225 | unsp->                                   | unsp->                                    |                     | 2033   | EP300     | slgddpsapqTlnkeqfskr   |
| IP100020985 | 1228 | 1232 |                                          | unsp+PKC->unsp+PKC+cdc2                   |                     | 2033   | EP300     | pqttnkeqSKrknrdtope    |
| IP100020985 | 1331 | 1329 | unsp->                                   | unsp->                                    |                     | 2033   | EP300     | gevtvrvhaSdktvevkgpm   |
| IP100020985 | 1331 | 1332 | ->PKC                                    | ->unsp+PKC                                |                     | 2033   | EP300     | tvrvvhaskdTvsvkpgnkar  |
| IP100020985 | 1427 | 1430 | unsp->                                   | unsp->                                    |                     | 2033   | EP300     | gyleyvklglyTtghiwacpp  |
| IP100020985 | 1427 | 1431 | ->cdc2                                   | ->cdc2                                    |                     | 2033   | EP300     | yleyvvklglyTtghiwacpp  |
| IP100020985 | 1499 | 1496 | unsp+PKC->unsp                           | unsp+PKC->unsp                            |                     | 2033   | EP300     | ifkqatedrITsakelpfyeg  |
| IP100020985 | 1499 | 1497 | unsp+PKG+RSK->unsp+PKA+RSK               | unsp+PKG+RSK->unsp+PKA+RSK                |                     | 2033   | EP300     | fkqatedrITsakelpfyeg   |
| IP100020985 | 1499 | 1503 | unsp->                                   |                                           |                     | 2033   | EP300     | dritsakelpYfegdwpnvl   |
| IP100020985 | 1542 | 1537 | unsp+cdc2->unsp                          | unsp+cdc2-></                             |                     |        |           |                        |

Table S3

|             |      |      |                              |                                    |       |        |                        |
|-------------|------|------|------------------------------|------------------------------------|-------|--------|------------------------|
| IP100020985 | 1546 | 1541 | CKI+PKC->CKI                 | CKI+PKC->PKC                       | 2033  | EP300  | entsnestdvTkgdsknakk   |
| IP100020985 | 1546 | 1545 |                              | PKC->DNAPK                         | 2033  | EP300  | nestdvtkgdSKnakkknkk   |
| IP100020985 | 1549 | 1545 | PKC->unsp                    | PKC->unsp                          | 2033  | EP300  | nestdvtkgdSKnakkknkk   |
| IP100020985 | 1550 | 1545 | PKC->                        |                                    | 2033  | EP300  | nestdvtkgdSKnakkknkk   |
| IP100020985 | 1551 | 1556 | unsp+PKC+PKG->unsp+PKC       | unsp+PKC+PKG->unsp+PKC             | 2033  | EP300  | knakkknkkTSknkslsrg    |
| IP100020985 | 1554 | 1556 | unsp+PKC+PKG->PKC            | unsp+PKC->PKC                      | 2033  | EP300  | knakkknkkTSknkslsrg    |
| IP100020985 | 1554 | 1557 | unsp+PKC->PKC                | unsp+PKC->PKC                      | 2033  | EP300  | knakkknkkTSknkslsrg    |
| IP100020985 | 1555 | 1556 | unsp+PKC+PKG->unsp+PKC       | unsp+PKC+PKG->unsp+PKC             | 2033  | EP300  | knakkknkkTSknkslsrg    |
| IP100020985 | 1555 | 1557 | unsp+PKC->PKC                | unsp+PKC->PKC                      | 2033  | EP300  | knakkknkkTSknkslsrg    |
| IP100020985 | 1558 | 1556 | unsp+PKC+PKG->PKC            | unsp+PKC+PKG->PKC                  | 2033  | EP300  | knakkknkkTSknkslsrg    |
| IP100020985 | 1558 | 1557 |                              | unsp+PKC->unsp+PKC+DNAPK           | 2033  | EP300  | knakkknkkTSknkslsrg    |
| IP100020985 | 1558 | 1561 | unsp+PKC->                   | unsp+PKC->PKC                      | 2033  | EP300  | knakkknkkTSknkslsrg    |
| IP100020985 | 1558 | 1562 | unsp->                       |                                    | 2033  | EP300  | knakkknkkTSknkslsrg    |
| IP100020985 | 1558 | 1562 | unsp->                       |                                    | 2033  | EP300  | knakkknkkTSknkslsrg    |
| IP100020985 | 1558 | 1564 | unsp+PKC->unsp+CKI+PKC       | unsp+PKC->unsp+CKI+PKC             | 2033  | EP300  | knakkknkkTSknkslsrg    |
| IP100020985 | 1560 | 1556 | unsp+PKC+PKG->unsp+PKC       | unsp+PKC+PKG->PKC+PKG              | 2033  | EP300  | knakkknkkTSknkslsrg    |
| IP100020985 | 1560 | 1557 | unsp+PKC->PKC                |                                    | 2033  | EP300  | knakkknkkTSknkslsrg    |
| IP100020985 | 1560 | 1561 | unsp+PKC->PKC                | unsp+PKC->PKC                      | 2033  | EP300  | knakkknkkTSknkslsrg    |
| IP100020985 | 1560 | 1562 | unsp->                       | unsp->unsp+DNAPK                   | 2033  | EP300  | knakkknkkTSknkslsrg    |
| IP100020985 | 1560 | 1564 | unsp+PKC->unsp+CKI+PKC       | unsp+PKC->unsp+CKI+PKC             | 2033  | EP300  | knakkknkkTSknkslsrg    |
| IP100020985 | 1568 | 1562 | unsp->unsp+PKA               |                                    | 2033  | EP300  | knakkknkkTSknkslsrg    |
| IP100020985 | 1568 | 1564 | unsp+PKC->unsp               |                                    | 2033  | EP300  | knakkknkkTSknkslsrg    |
| IP100020985 | 1583 | 1587 | PKC->                        |                                    | 2033  | EP300  | knakkknkkTSknkslsrg    |
| IP100020985 | 1590 | 1587 | PKC->                        |                                    | 2033  | EP300  | knakkknkkTSknkslsrg    |
| IP100020985 | 1592 | 1587 | PKC->                        |                                    | 2033  | EP300  | knakkknkkTSknkslsrg    |
| IP100020985 | 1674 | 1668 | INSR->                       | INSR->                             | 2033  | EP300  | knakkknkkTSknkslsrg    |
| IP100020985 | 1699 | 1696 | -->EGFR                      | -->EGFR                            | 2033  | EP300  | knakkknkkTSknkslsrg    |
| IP100020985 | 1699 | 1698 |                              | -->DNAPK                           | 2033  | EP300  | knakkknkkTSknkslsrg    |
| IP100020985 | 1760 | 1757 | PKC->                        |                                    | 2033  | EP300  | knakkknkkTSknkslsrg    |
| IP100020985 | 1762 | 1757 | PKC->                        |                                    | 2033  | EP300  | knakkknkkTSknkslsrg    |
| IP100020985 | 1769 | 1768 |                              | PKC->DNAPK                         | 2033  | EP300  | knakkknkkTSknkslsrg    |
| IP100020985 | 1772 | 1768 | PKC->                        | PKC->                              | 2033  | EP300  | knakkknkkTSknkslsrg    |
| IP100021048 | 884  | 886  | unsp+cdc2->cdc2              |                                    | 26509 | MYOF   | tslgvrnkTSdytqiklkr    |
| IP100021062 | 70   | 62   | unsp->unsp+cdc2              |                                    | 1409  | CRYAA  | lfrtldsglSevrsdrkfv    |
| IP100021062 | 78   | 81   | unsp->unsp+GSK3              |                                    | 1409  | CRYAA  | fvfildvkhfSpeditkvqd   |
| IP100021062 | 88   | 86   | unsp+PKC->                   | unsp+PKC->                         | 1409  | CRYAA  | dkvhfSpeditkvqddfve    |
| IP100021062 | 145  | 140  | unsp+PKC->unsp               | unsp+PKC->unsp                     | 1409  | CRYAA  | scslsadgmITfcgpiqtgl   |
| IP100021088 | 362  | 353  | -->cdc2                      |                                    | 8514  | KCNAB2 | lsssiheidSilgnkpyssk   |
| IP100021088 | 362  | 361  | unsp+PKC->unsp               | unsp+PKC->ATM+unsp                 | 8514  | KCNAB2 | idsilgnkpySkdyrs----   |
| IP100021088 | 362  | 365  | INSR+unsp->                  | INSR+unsp->                        | 8514  | KCNAB2 | lgnkpysskdYrs-----     |
| IP100021088 | 362  | 367  | unsp->                       | unsp->                             | 8514  | KCNAB2 | nlkpysskdYrs-----      |
| IP100021129 | 592  | 591  | unsp->                       | unsp+PKC->ATM+unsp+PKC+DNAPK       | 8546  | AP3B1  | nvprnsgslSkypakiffatg  |
| IP100021175 | 504  | 500  | unsp+PKC->                   | unsp+PKC->PKC                      | 51755 | CDK12  | hlvldlkaogTrdskipalke  |
| IP100021175 | 504  | 503  | PKA->CKI+PKA                 | PKA->ATM+PKA+DNAPK                 | 51755 | CDK12  | kdlikaogtrdskipalke    |
| IP100021187 | 2    | 10   | PKC->PKC+cdc2                |                                    | 8607  | RUVBL1 | --mkieevkstTktqriashs  |
| IP100021187 | 453  | 454  | INSR+unsp->unsp              |                                    | 8607  | RUVBL1 | akilaqdqdkYmk-----     |
| IP100021263 | 49   | 45   | PKC->PKA                     |                                    | 7534  | YWHAZ  | elsneermlSVayknvrgar   |
| IP100021263 | 68   | 63   | unsp+PKG->unsp+PKG+PKA       | unsp+PKG->unsp+PKG+PKA             | 7534  | YWHAZ  | garrrsvrvvSsieqtegae   |
| IP100021263 | 68   | 64   | PKC->                        | PKC->unsp                          | 7534  | YWHAZ  | arrrssvrvvSsieqtegae   |
| IP100021263 | 68   | 69   |                              | CKII->unsp+CKII                    | 7534  | YWHAZ  | vrwvsvsieqTegaeqgma    |
| IP100021263 | 115  | 110  | unsp+DNAPK->DNAPK            | unsp+DNAPK->DNAPK                  | 7534  | YWHAZ  | ilekfilpnaSgaeskfyik   |
| IP100021263 | 115  | 114  |                              | -->DNAPK                           | 7534  | YWHAZ  | flpnasgaeSkvfyiklmkgd  |
| IP100021263 | 115  | 118  | unsp->                       | unsp->                             | 7534  | YWHAZ  | nasqaeskvfYlkmkgdyrry  |
| IP100021263 | 120  | 118  | unsp->                       | unsp->                             | 7534  | YWHAZ  | nasqaeskvfYlkmkgdyrry  |
| IP100021263 | 122  | 118  |                              | unsp->unsp+EGFR                    | 7534  | YWHAZ  | nasqaeskvfYlkmkgdyrry  |
| IP100021263 | 122  | 125  | unsp->                       | unsp->                             | 7534  | YWHAZ  | kvfyikmkgdyrrylaevaag  |
| IP100021263 | 122  | 126  | unsp->                       | unsp->                             | 7534  | YWHAZ  | vfyikmkgdyrrylaevaag   |
| IP100021266 | 70   | 64   | unsp+PKG->unsp+PKG+PKA       |                                    | 6147  | RPL23A | lrrqpkpyrSaprmklidhy   |
| IP100021266 | 70   | 74   | unsp->                       |                                    | 6147  | RPL23A | saprmklidhyilfipfte    |
| IP100021290 | 86   | 94   | PKC->PKC+cdc2                |                                    | 47    | ACLY   | wlkiprggaeTvgkatgfkn   |
| IP100021290 | 948  | 947  |                              | -->ATM+DNAPK                       | 47    | ACLY   | galdaakmfSKafdsiglipm  |
| IP100021327 | 6    | 12   | unsp->unsp+CKII              |                                    | 2885  | GRB2   | eaiakydfkaTaddelsfrkr  |
| IP100021327 | 50   | 52   |                              | -->EGFR                            | 2885  | GRB2   | ngkgdfipknYiemkphppwff |
| IP100021347 | 131  | 130  | CKI+cdc2->ATM+CKI+cdc2+DNAPK |                                    | 7332  | UBE2L3 | plradlaeeySKdrkkfckna  |
| IP100021370 | 14   | 19   | unsp+CKI->unsp               | unsp+CKI->unsp                     | 3093  | UBE2K  | ikrefevikSeetsknqkv    |
| IP100021405 | 97   | 91   | unsp->unsp+PKA               | unsp->unsp+PKA                     | 4000  | LMNA   | yeaeldarkTidsvakerar   |
| IP100021405 | 97   | 94   | unsp+PKC->unsp               |                                    | 4000  | LMNA   | elgdarkTidsvakerarqtl  |
| IP100021405 | 108  | 107  | unsp+cdc2->cdc2              |                                    | 4000  | LMNA   | ksarirlelSkvrselc      |
| IP100021405 | 233  | 239  | -->CKII                      |                                    | 4000  | LMNA   | idngkqrefeSrladalqelr  |
| IP100021405 | 311  | 307  | PKC+DNAPK->DNAPK             | PKC+DNAPK->DNAPK                   | 4000  | LMNA   | lridslsaaQLsqllqlaake  |
| IP100021405 | 417  | 409  | PKC+DNAPK->PKC+cdc2+DNAPK    |                                    | 4000  | LMNA   | rgrrasshsstQggsgsvtkkr |
| IP100021428 | 52   | 54   | unsp->                       |                                    | 58    | ACTA1  | gvmvmgmkqdSyvgdeaqskr  |
| IP100021428 | 52   | 55   | INSR+unsp->                  | INSR+unsp->unsp                    | 58    | ACTA1  | vmvmgmkqdSyvgdeaqskr   |
| IP100021428 | 63   | 54   | unsp->unsp+cdc2              |                                    | 58    | ACTA1  | gvmvmgmkqdSyvgdeaqskr  |
| IP100021428 | 63   | 62   | unsp+PKC+cdc2->unsp+CKI+cdc2 | unsp+PKC+cdc2->ATM+unsp+cdc2+DNAPK | 58    | ACTA1  | kdsyvgdeaqSKrgilitkyp  |
| IP100021428 | 70   | 68   | unsp+PKC->PKC                | unsp+PKC->                         | 58    | ACTA1  | deaqskrgyTllykpielgfi  |
| IP100021428 | 193  | 188  | -->PKA                       |                                    | 58    | ACTA1  | mrdladgrITdyimkiler    |
| IP100021428 | 328  | 325  | unsp+PKC+cdc2->cdc2          | unsp+PKC+cdc2->unsp+cdc2           | 58    | ACTA1  | mqkeitalapStmkikiapp   |
| IP100021428 | 328  | 326  | PKC->                        | PKC->                              | 58    | ACTA1  | qkeitalapsTmkikiappe   |
| IP100021428 | 330  | 325  | unsp+PKC+cdc2->cdc2          | unsp+PKC+cdc2->cdc2                | 58    | ACTA1  | mqkeitalapStmkikiapp   |
| IP100021428 | 330  | 326  | PKC->                        |                                    | 58    | ACTA1  | qkeitalapsTmkikiappe   |
| IP100021435 | 407  | 405  | unsp+PKC->                   | unsp+PKC->                         | 5701  | PSMC2  | fairarrkiaTekdfeavnk   |
| IP100021439 | 50   | 52   | unsp->                       |                                    | 60    | ACTB   | gvmvmgmkqdSyvgdeaqskr  |
| IP100021439 | 50   | 53   | INSR+unsp->                  |                                    | 60    | ACTB   | vmvmgmkqdSyvgdeaqskr   |
| IP100021439 | 61   | 52   | unsp->unsp+cdc2              |                                    | 60    | ACTB   | gvmvmgmkqdSyvgdeaqskr  |
| IP100021439 | 61   | 60   | unsp+PKC+cdc2->unsp+CKI+cdc2 | unsp+PKC+cdc2->ATM+unsp+cdc2+DNAPK | 60    | ACTB   | kdsyvgdeaqSKrgilitkyp  |
| IP100021439 | 326  | 323  | unsp+PKC+cdc2->cdc2          | unsp+PKC+cdc2->unsp+cdc2           | 60    | ACTB   | mqkeitalapStmkikiapp   |
| IP100021439 | 326  | 324  | PKC->                        | PKC->                              | 60    | ACTB   | qkeitalapsTmkikiappe   |
| IP100021440 | 50   | 52   | unsp->                       |                                    | 71    | ACTG1  | gvmvmgmkqdSyvgdeaqskr  |
| IP100021440 | 50   | 53   | INSR+unsp->                  | INSR+unsp->unsp                    | 71    | ACTG1  | vmvmgmkqdSyvgdeaqskr   |
| IP100021440 | 61   | 52   | unsp->unsp+cdc2              |                                    | 71    | ACTG1  | gvmvmgmkqdSyvgdeaqskr  |
| IP100021440 | 61   | 60   | unsp+PKC+cdc2->unsp+CKI+cdc2 | unsp+PKC+cdc2->ATM+unsp+cdc2+DNAPK | 71    | ACTG1  | kdsyvgdeaqSKrgilitkyp  |
| IP100021440 | 191  | 186  | -->PKA                       |                                    | 71    | ACTG1  | lridladgrITdyimkiler   |
| IP100021440 | 326  | 323  | unsp+PKC+cdc2->cdc2          | unsp+PKC+cdc2->unsp+cdc2           | 71    | ACTG1  | mqkeitalapStmkikiapp   |
| IP100021440 | 326  | 324  | PKC->                        | PKC->                              | 71    | ACTG1  | qkeitalapsTmkikiappe   |
| IP100021518 | 278  | 280  |                              | PKC->CaM-II                        | 1643  | DOB2   | wldirvgvkaSflyslphrph  |
| IP100021700 | 77   | 73   | PKC->                        | PKC->                              | 5111  | PCNA   | dmlamgvrnlTsmksilkcaag |
| IP100021700 | 77   | 76   |                              | -->ATM+DNAPK                       | 5111  | PCNA   | lamgvrnlTsmksilkcaag   |
| IP100021700 | 80   | 76   | -->PKA                       |                                    | 5111  | PCNA   | lamgvrnlTsmksilkcaag   |
| IP100021766 | 1104 | 1102 | unsp->                       | unsp->                             | 57142 | RTN4   | snslaghnvncTikelrllfv  |
| IP100021805 | 42   | 40   | unsp+PKC+PKG->PKC            | unsp+PKC+PKG->                     | 4257  | MGST1  | mtstafyrlTrkvfanpedc   |
| IP100021812 | 884  | 886  | unsp+PKC->PKC                | unsp+PKC->                         | 79026 | AHNAK  | kmpkrmknpgK5mpgfkagepe |
| IP100021840 | 30   | 26   | PKC->                        |                                    | 6194  | RP56   | ievdderklTlyekmatev    |
| IP100021840 | 203  | 199  | unsp+PKC->PKC                | unsp+PKC->PKC                      | 6194  | RP56   | rrialkkrqTKnkkeaaey    |
| IP100021840 | 211  | 209  | unsp->                       |                                    | 6194  | RP56   | tkknkeaaeyYaklalkrmke  |
| IP100021885 | 620  | 618  | unsp+PKC->cdc2               |                                    | 2243  | FGA    | gseadheghStkgrhaksrp   |
| IP100021885 | 625  | 618  | unsp+PKC->unsp+PKC+cdc2      |                                    | 2243  | FGA    | gseadheghStkgrhaksrp   |
| IP100021885 | 625  | 626  | unsp->                       | unsp->                             | 2243  | FGA    | thstkrghakSprpvdcdv    |
| IP100021924 | 47   | 49   | PKA->                        |                                    | 8971  | H1FX   | skkknpgkyqSglvvetlrl   |
| IP100021926 | 72   | 74   | PKC+PKG->PKC                 | PKC+PKG->                          | 5706  | PSMC6  | lteekfivkaTngpryrvvgr  |
| IP100021926 | 206  | 201  | PKC->                        |                                    | 5706  | PSMC6  | ldeknkvvSsdvlykiges    |
| IP100021926 | 206  | 202  | unsp->unsp+PKA               |                                    | 5706  | PSMC6  | dcnrlkvvSsdvlykiges    |
| IP100021926 | 206  | 207  | INSR->                       |                                    | 5706  | PSMC6  | kvsssvdvkVigesarile    |
| IP100021926 | 206  | 211  | unsp->                       | unsp->                             | 5706  | PSMC6  | ssvdkyigeSarilemfnf    |
| IP100022018 | 197  | 204  | -->PKA                       |                                    | 8813  | DPM1   | vlekliekvSKgyvfgmeme   |
| IP100022055 | 416  | 411  | PKC+cdc2->cdc2               |                                    | 8850  | KAT2B  | ssleqpnagsSpackassgl   |
| IP100022055 | 416  | 412  | -->unsp                      | -->unsp                            | 8850  | KAT2B  | ssleqpnagsSpackassgl   |
| IP100022055 | 416  | 418  | PKA->                        | PKA->                              | 8850  | KAT2B  | agsspackaSgleanpgkek   |
| IP100022055 | 416  | 419  | unsp+CKII->cdc2+CKII         | unsp+CKII->cdc2+CKII               | 8850  | KAT2B  | gsspackaSgleanpgkek    |
| IP100022055 | 428  | 419  | unsp+CKII->unsp+cdc2+CKII    |                                    | 8850  | KAT2B  | gsspackaSgleanpgkek    |
| IP100022055 | 428  | 434  | unsp+CKII->unsp+cdc2+CKII    |                                    | 8850  | KAT2B  | ngpekrmtDShvleakpr     |
| IP100022055 | 430  | 432  | PKG+PKA->PKA                 | PKG+PKA->unsp+PKA                  | 8850  | KAT2B  | eanpgkekrmTdsheleakpr  |
| IP100022055 | 430  | 434  | unsp+CKII->CKII              | unsp+CKII->unsp+cdc2+CKII          | 8850  | KAT2B  | ngpekrmtDShvleakpr     |
| IP100022055 | 441  | 434  | unsp+CKII->unsp+cdc2+CKII    |                                    | 8850  | KAT2B  | ngpekrmtDShvleakpr     |
| IP100022055 | 733  | 729  | unsp->                       | unsp->                             | 8850  | KAT2B  | skpdrpdqlystlsilqqv    |
| IP100022055 | 733  | 731  | PKC->cdc2                    | PKC->                              | 8850  | KAT2B  | epdrpdqlystlsilqqv     |
| IP100022055 | 733  | 734  | -->PKC                       | -->PKC                             | 8850  | KAT2B  | dpdqlystlsilqqvshs     |
| IP100022145 | 9    | 13   | EGFR->                       |                                    | 64710 | NUCKS1 | rprmrkvvdtsqfqseddad   |
| IP100022145 | 35   | 30   | unsp->unsp+PKA               | unsp->unsp+PKA                     | 64710 | NUCKS1 | ddadedygdSgpttkirs     |

Table S3

|             |      |      |                                      |                             |       |         |                        |
|-------------|------|------|--------------------------------------|-----------------------------|-------|---------|------------------------|
| IP100022145 | 35   | 34   | unsp+PKC->ATM+unsp+PKC               | PhosphoSite                 | 64710 | NUCKS1  | edygrdsppTtkirsprea    |
| IP100022145 | 35   | 40   | unsp+PKC+RSK->unsp+RSK               | PhosphoSite                 | 64710 | NUCKS1  | sgpptkirsSpreankrrs    |
| IP100022145 | 52   | 50   | unsp+PKC+PKA->unsp+PKA               | PhosphoSite                 | 64710 | NUCKS1  | spreankrrsSgknsqesed   |
| IP100022145 | 175  | 177  | PKC+PKG->PKC                         | Uniprot PhosphoSite         | 64710 | NUCKS1  | kkmpkprkaTvtspvkgkg    |
| IP100022145 | 184  | 181  | unsp+cdk5->unsp                      | Uniprot PHOShoELM PhosphoSi | 64710 | NUCKS1  | kprikatvtpSvkgkgkvgr   |
| IP100022145 | 188  | 193  | unsp+PKC->unsp                       |                             | 64710 | NUCKS1  | vkqkgkvgrpTaskaskektp  |
| IP100022145 | 196  | 193  | unsp+PKC->unsp                       |                             | 64710 | NUCKS1  | vkqkgkvgrpTaskaskektp  |
| IP100022145 | 196  | 195  | PKC->PKC+DNAPK                       |                             | 64710 | NUCKS1  | gkgkvgrptaSkaskektsp   |
| IP100022145 | 196  | 198  |                                      |                             | 64710 | NUCKS1  | kvgrptaskaSkektspsk    |
| IP100022145 | 196  | 202  |                                      |                             | 64710 | NUCKS1  | ptaskaskeTpspkeedee    |
| IP100022202 | 209  | 208  | INSR->                               |                             | 5250  | SLC25A3 | ntrdaapkmYkeeglkafyk   |
| IP100022202 | 214  | 208  | INSR->                               |                             | 5250  | SLC25A3 | ntrdaapkmYkeeglkafyk   |
| IP100022215 | 1035 | 1031 | ->PKA                                |                             | 23394 | ADNP    | gdreqllkwnSsygkvvefw   |
| IP100022215 | 1035 | 1032 | unsp+PKC+PKA->PKA                    |                             | 23394 | ADNP    | gdreqllkwnSsygkvvefw   |
| IP100022215 | 1035 | 1033 | unsp+EGFR->unsp                      |                             | 23394 | ADNP    | reqllkwnSsygkvvefw     |
| IP100022215 | 1042 | 1041 |                                      |                             | 23394 | ADNP    | ssygkvvefwSkdqsqwn     |
| IP100022215 | 1042 | 1045 | PKC+DNAPK->DNAPK                     |                             | 23394 | ADNP    | kvegfwskdqSqwnasende   |
| IP100022229 | 2004 | 2001 | unsp+PKC->                           |                             | 338   | APOB    | esyqlddaynTkdqigvelgt  |
| IP100022276 | 133  | 134  | unsp+EGFR->unsp                      |                             | 28957 | MRPS28  | crpevdgkayTqkgtrvril   |
| IP100022314 | 68   | 69   | unsp+EGFR->SRC+unsp                  |                             | 6648  | SOD2    | vnnlnvteekYqaalakgdt   |
| IP100022314 | 132  | 136  | PKG->                                |                             | 6648  | SOD2    | gsdfdkfekiTaasvvgvsg   |
| IP100022348 | 487  | 482  | unsp+PKC+DNAPK->unsp+DNAPK           |                             | 5371  | PML     | taaqrkcsqTqcpkvikme    |
| IP100022348 | 515  | 512  | unsp+unsp+PKA                        |                             | 5371  | PML     | arspspegrptSkavspphi   |
| IP100022348 | 515  | 513  | unsp+PKC->unsp                       |                             | 5371  | PML     | rspspegrptSkavspphi    |
| IP100022348 | 515  | 514  | unsp->                               |                             | 5371  | PML     | sspeqrptSkavspphi      |
| IP100022373 | 343  | 338  | unsp+PKC+cdk5+p38MAPK->unsp+p38MAPK  |                             | 28987 | NOB1    | nprglvslpTpskgkvainp   |
| IP100022443 | 413  | 415  | PKG->                                |                             | 174   | AFP     | iqesqalaksSgllgkleg    |
| IP100022449 | 67   | 62   | PKC->                                |                             | 1794  | DOCK2   | hkmqlgipfKsfihikevtve  |
| IP100022449 | 738  | 736  | PKC->                                |                             | 1794  | DOCK2   | rgeqcepillTlkaleyfkf   |
| IP100022465 | 1721 | 1720 | unsp->unsp+DNAPK                     |                             | 11113 | CTT     | vvilrynenISkyrcirkeiet |
| IP100022597 | 3    | 6    | unsp+PKC->unsp+CKI+PKC               |                             | 9040  | UBE2M   | -----nikitISlqqkseees  |
| IP100022648 | 55   | 52   | unsp->                               |                             | 1983  | E1F5    | vakalnrrptYtkyfcgclg   |
| IP100022648 | 55   | 54   | ->DNAPK                              |                             | 1983  | E1F5    | kalnrrptYtkyfcgclg     |
| IP100022744 | 158  | 155  | PKC->PKA                             |                             | 1434  | CSE1L   | vingvrlthSifkryrhefk   |
| IP100022744 | 574  | 571  | unsp->SRC+unsp                       |                             | 1434  | CSE1L   | tltpgsseneYimkaimrfs   |
| IP100022774 | 8    | 3    | PKC->                                | Uniprot PhosphoSite         | 7415  | VCP     | -----maSgadsqddls      |
| IP100022774 | 8    | 7    | unsp->unsp+CKI                       | Uniprot PhosphoSite         | 7415  | VCP     | -----masgadSkqddistail |
| IP100022774 | 8    | 14   | PKC->PKC+cdc2                        | PhosphoSite                 | 7415  | VCP     | gadsqddlsTailkqknrrp   |
| IP100022774 | 18   | 14   | PKC->                                | PhosphoSite                 | 7415  | VCP     | gadsqddlsTailkqknrrp   |
| IP100022774 | 60   | 56   | ->PKA                                | PhosphoSite                 | 7415  | VCP     | mdelqilgrITpkyfclgkme  |
| IP100022774 | 81   | 78   | unsp+CKII->CKII                      | PhosphoSite                 | 7415  | VCP     | vcvlsdctcSdekimmrvv    |
| IP100022774 | 251  | 249  | unsp->                               | PhosphoSite                 | 7415  | VCP     | rgillypppgTgktliaraa   |
| IP100022774 | 386  | 385  | cdc2->cdc2+DNAPK                     | PhosphoSite                 | 7415  | VCP     | tgrieliqhtKnmkldaddv   |
| IP100022774 | 505  | 509  | unsp->unsp+p38MAPK                   | Uniprot PhosphoSite         | 7415  | VCP     | hpdtkfkfmgTpskgvlyfpg  |
| IP100022774 | 505  | 511  | ->PKA                                | PhosphoSite                 | 7415  | VCP     | dkfkfmgtpSkgvlyfpg     |
| IP100022774 | 512  | 509  | unsp->unsp+p38MAPK                   | Uniprot PhosphoSite         | 7415  | VCP     | hpdtkfkfmgTpskgvlyfpg  |
| IP100022774 | 512  | 511  | ->PKA                                | PhosphoSite                 | 7415  | VCP     | dkfkfmgtpSkgvlyfpg     |
| IP100022774 | 614  | 612  | unsp+PKC->cdc2                       | PhosphoSite                 | 7415  | VCP     | nqiltemdmgSTuknvlfiag  |
| IP100022774 | 658  | 658  | unsp+GSK3->unsp                      | PhosphoSite                 | 7415  | VCP     | vaillkanlrSpavkdvdlef  |
| IP100022774 | 663  | 664  | unsp+GSK3->unsp                      | PhosphoSite                 | 7415  | VCP     | vaillkanlrSpavkdvdlef  |
| IP100022774 | 668  | 664  | unsp+GSK3->unsp+GSK3+PKA             | PhosphoSite                 | 7415  | VCP     | vaillkanlrSpavkdvdlef  |
| IP100022774 | 696  | 702  | unsp->unsp+PKA                       | Uniprot PhosphoSite         | 7415  | VCP     | qracklaireSiesiereire  |
| IP100022793 | 72   | 67   | unsp+PKC+cdc2->PKC+cdc2              |                             | 3032  | HADHB   | vdgvrtpfllSgtsykdImph  |
| IP100022793 | 188  | 191  | unsp+PKC->                           |                             | 3032  | HADHB   | kimldlnakSmgqrslisik   |
| IP100022793 | 201  | 197  | unsp+PKC->unsp+PKC+PKA               |                             | 3032  | HADHB   | nkaksmgqrSlisikfrnfl   |
| IP100022793 | 201  | 200  |                                      |                             | 3032  | HADHB   | ksmgqrslisikfrnflape   |
| IP100022793 | 348  | 356  | ->cdc2                               |                             | 3032  | HADHB   | dpkdqlllgTytatpklveka  |
| IP100022865 | 68   | 69   | unsp+PKC+PKG->unsp+PKC               |                             | 890   | CCNA2   | rdjsgpeprkTrryvalkdp   |
| IP100022865 | 95   | 94   | ->PKA                                |                             | 890   | CCNA2   | hvtvppwkanSkapattlhvd  |
| IP100022891 | 96   | 95   | INSR+unsp->INSR+unsp+EGFR            |                             | 291   | SLC25A4 | qalnfafdkYkqlflggdvr   |
| IP100023006 | 63   | 54   | unsp->unsp+cdc2                      |                             | 70    | ACTC1   | gvnmvgmqkdSvvgdeaqskr  |
| IP100023006 | 63   | 62   | unsp+PKC+cdc2->unsp+CKI+cdc2         |                             | 70    | ACTC1   | kdsyvgdeaqSkrgiltitky  |
| IP100023006 | 70   | 68   | unsp+PKC->PKC                        |                             | 70    | ACTC1   | deaqskrgilTtkypleghii  |
| IP100023084 | 456  | 461  | unsp+PKG+PKA->unsp                   |                             | 57567 | ZNF319  | caaaekplrcTlcerffss    |
| IP100023161 | 230  | 225  | unsp+CaM-II+RSK->CaM-II              |                             | 26589 | MRPL46  | fkdpqamrteSnlqagvffrk  |
| IP100023161 | 265  | 263  | unsp->                               |                             | 26589 | MRPL46  | vvwkdeldgTlkykylacvr   |
| IP100023234 | 271  | 268  | PKC->                                |                             | 10054 | UBA2    | lfkaidylITmdkwiwrksp   |
| IP100023234 | 324  | 323  |                                      |                             | 10054 | UBA2    | ldvksyarlfSksetivnlh   |
| IP100023234 | 617  | 621  | unsp+PKC->unsp                       |                             | 10054 | UBA2    | krkldekenISakrsrieqk   |
| IP100023339 | 1014 | 1013 |                                      |                             | 1387  | CREBBP  | aedtepdgpeSkgeprsemme  |
| IP100023339 | 1203 | 1204 | unsp->                               |                             | 1387  | CREBBP  | qslgyccgrkYefspqtlicy  |
| IP100023339 | 1203 | 1207 | ->cdk5                               |                             | 1387  | CREBBP  | gyccgrkyefSpqtlicyqkq  |
| IP100023339 | 1535 | 1532 | unsp+PKC->unsp                       |                             | 1387  | CREBBP  | ifkqatdrITsakelpfyeg   |
| IP100023339 | 1535 | 1533 | unsp+PKG+RSK->unsp+PKA+RSK           |                             | 1387  | CREBBP  | fkqatdrITsakelpfyeg    |
| IP100023339 | 1535 | 1539 | unsp->                               |                             | 1387  | CREBBP  | frksakelpfyegSgqkylpvl |
| IP100023339 | 1583 | 1582 | unsp->                               |                             | 1387  | CREBBP  | settesqsgdSknnknnknk   |
| IP100023339 | 1586 | 1582 | PKC->unsp                            |                             | 1387  | CREBBP  | settesqsgdSknnknnknk   |
| IP100023339 | 1588 | 1582 |                                      |                             | 1387  | CREBBP  | settesqsgdSknnknnknk   |
| IP100023339 | 1588 | 1593 | PKC+PKG->PKC                         |                             | 1387  | CREBBP  | knakknnknkTnknksisra   |
| IP100023339 | 1591 | 1582 | PKC->PKC+cdc2                        |                             | 1387  | CREBBP  | settesqsgdSknnknnknk   |
| IP100023339 | 1591 | 1593 | PKC+PKG->PKC                         |                             | 1387  | CREBBP  | knakknnknkTnknksisra   |
| IP100023339 | 1592 | 1593 | PKC+PKG->PKC                         |                             | 1387  | CREBBP  | knakknnknkTnknksisra   |
| IP100023339 | 1595 | 1593 | PKC+PKG->                            |                             | 1387  | CREBBP  | knakknnknkTnknksisra   |
| IP100023339 | 1597 | 1593 | PKC+PKG->PKC                         |                             | 1387  | CREBBP  | knakknnknkTnknksisra   |
| IP100023339 | 1597 | 1599 | ->PKC                                |                             | 1387  | CREBBP  | nnktnknksisSisrannkkps |
| IP100023339 | 1597 | 1601 | unsp+PKC->                           |                             | 1387  | CREBBP  | kktnnknksisSisrannkkps |
| IP100023339 | 1797 | 1794 | PKC->                                |                             | 1387  | CREBBP  | qmcnancslpScqkmkrvqh   |
| IP100023340 | 350  | 347  | PKC+cdc2->cdc2                       |                             | 7994  | MYST3   | rpknrlkqntTsvkgpfskvr  |
| IP100023340 | 350  | 349  | PKC->                                |                             | 7994  | MYST3   | knrlkqntTsvkgpfskvrtg  |
| IP100023340 | 350  | 354  | unsp+PKC->unsp                       |                             | 7994  | MYST3   | kqntvsgkpfSkvrtgpggr   |
| IP100023340 | 355  | 354  | unsp+PKC->unsp                       |                             | 7994  | MYST3   | kqntvsgkpfSkvrtgpggr   |
| IP100023340 | 355  | 358  | PKC->                                |                             | 7994  | MYST3   | vskgpfskvrTppargrkkl   |
| IP100023340 | 415  | 420  | unsp+cdk5+p38MAPK->cdk5+p38MAPK      | Uniprot PhosphoSite         | 7994  | MYST3   | vskgpfskvrTppargrkkl   |
| IP100023340 | 604  | 605  | ->CKII                               |                             | 7994  | MYST3   | ldkafldhktTlydvepfif   |
| IP100023340 | 604  | 607  | unsp->                               |                             | 7994  | MYST3   | aklfldhktTlydvepfif    |
| IP100023340 | 815  | 812  | unsp->                               |                             | 7994  | MYST3   | pqccereleISvgksvshenk  |
| IP100023340 | 815  | 816  |                                      |                             | 7994  | MYST3   | ereleisvgkSvshenkeqds  |
| IP100023340 | 1007 | 1006 | ->DNAPK                              |                             | 7994  | MYST3   | srpsppilTktptlkrkpf    |
| IP100023340 | 1007 | 1009 | PKC->unsp+PKC                        |                             | 7994  | MYST3   | ssppiltpkTlkrkpfthr    |
| IP100023343 | 765  | 759  | unsp+PKC->unsp+PKC+PKA               |                             | 1741  | DLG3    | ealmmemrraTyeqankidyk  |
| IP100023591 | 273  | 270  | PKC->                                |                             | 5813  | PURA    | pykwakfghTfckyseemkk   |
| IP100023598 | 103  | 106  | unsp->                               |                             | 10382 | TUBB4   | gagnnwakghYtegaeldav   |
| IP100023598 | 103  | 107  | ->CKII                               |                             | 10382 | TUBB4   | agnnwakghYtegaeldav    |
| IP100023649 | 149  | 144  | PKC->                                |                             | 55206 | SBNO1   | vsaptyvrnamTsapksdqvql |
| IP100023649 | 149  | 148  | PKC->DNAPK                           |                             | 55206 | SBNO1   | tvramtsapSkdqvqlkdl    |
| IP100023649 | 413  | 408  | ATM+unsp+cdc2+DNAPK->cdc2+DNAPK      |                             | 55206 | SBNO1   | fatyslligeSagsgyktrkl  |
| IP100023649 | 413  | 410  | unsp+PKC+cdc2->cdc2                  |                             | 55206 | SBNO1   | tysslligesagSggyktrklq |
| IP100023649 | 413  | 414  | unsp->                               |                             | 55206 | SBNO1   | ligesagsgkYktrklqllhw  |
| IP100023649 | 413  | 416  | PKC->                                |                             | 55206 | SBNO1   | gesagsgkYktrklqllhw    |
| IP100023649 | 415  | 408  | ATM+unsp+cdc2+DNAPK->unsp+cdc2+DNAPK |                             | 55206 | SBNO1   | fatyslligeSagsgyktrkl  |
| IP100023649 | 415  | 410  | unsp+PKC+cdc2->cdc2                  |                             | 55206 | SBNO1   | tysslligesagSggyktrklq |
| IP100023756 | 378  | 369  | unsp+PKC->unsp+PKC+cdc2              |                             | 3720  | JARID2  | dkpnhhkgsSavnhitsgkt   |
| IP100023756 | 378  | 376  | unsp->                               |                             | 3720  | JARID2  | kpsavnhitsgktnessnakt  |
| IP100023756 | 378  | 382  | unsp->                               |                             | 3720  | JARID2  | nhitsgktnessnakt       |
| IP100023860 | 197  | 204  | unsp->unsp+cdc2                      |                             | 4673  | NAP1L1  | khlikdiikvSDagapmsfvl  |
| IP100023860 | 271  | 269  | PKC->                                |                             | 4673  | NAP1L1  | qidwkgknvTlktikqkqh    |
| IP100023919 | 222  | 217  | unsp->                               |                             | 5705  | PSMC5   | tdctfirvsgSelvakfieg   |
| IP100024067 | 507  | 511  | p38MAPK->                            |                             | 1213  | CLTC    | ilyakkvgtYpdwiflrmv    |
| IP100024067 | 1441 | 1440 | PKC->                                |                             | 1213  | CLTC    | ldhtravnyISkvkqplvlp   |
| IP100024067 | 1449 | 1440 | PKC->PKC+cdc2                        |                             | 1213  | CLTC    | ldhtravnyISkvkqplvlp   |
| IP100024067 | 1449 | 1454 |                                      |                             | 1213  | CLTC    | qlplvkpylrSvqnhnksv    |
| IP100024097 | 101  | 105  |                                      |                             | 26136 | TES     | tnpvaaknSintvtyewap    |
| IP100024157 | 160  | 163  | unsp+PKC->unsp                       |                             | 2287  | FKBP3   | akkkknakplSfkvgvgkvir  |
| IP100024157 | 201  | 198  | unsp->unsp+EGFR                      |                             | 2287  | FKBP3   | arleiepewaYgkkgdpadi   |
| IP100024163 | 445  | 446  | unsp->SRC+unsp                       |                             | 11228 | POLR3A  | nrekmaeqelYgdverhli    |
| IP100024175 | 227  | 228  | INSR+unsp->                          |                             | 5688  | PSMA7   | kinlpeiekYvaeiekeee    |
| IP100024214 | 447  | 442  | PKC->                                |                             | 7014  | TERF2   | vqaapdedstTnitkqkvmtv  |
| IP100024214 | 488  | 493  | unsp+PKC+PKG->unsp+PKC               |                             | 7014  | TERF2   | tavmikrdwTnkrfgm---    |

Table S3

|             |      |      |                                          |                                                |                            |        |           |                         |
|-------------|------|------|------------------------------------------|------------------------------------------------|----------------------------|--------|-----------|-------------------------|
| IP100024291 | 36   | 32   |                                          | -> unsp                                        | PhosphoSite                | 572    | BAD       | lgpspadgpgSgsgkhrqap    |
| IP100024291 | 36   | 34   | unsp+PKC->                               | unsp+PKC->                                     | PhosphoSite                | 572    | BAD       | pspadgpgsSgkhrqapgl     |
| IP100024316 | 186  | 187  | unsp-> unsp+PKC                          | unsp-> unsp+PKC                                |                            | 4303   | FOXO4     | wwmlnpegkSGkapraas      |
| IP100024316 | 407  | 404  | ->PKA                                    |                                                |                            | 4303   | FOXO4     | ptlllgllpSSsklatgvl     |
| IP100024316 | 407  | 405  | unsp+PKC+cdc2->cdc2                      | cdc2->cdc2->DNAPK                              |                            | 4303   | FOXO4     | llilggllpSSsklatgvl     |
| IP100024316 | 407  | 406  | unsp+PKC+cdc2->cdc2                      | cdc2->cdc2->DNAPK                              |                            | 4303   | FOXO4     | llilggllpSSsklatgvl     |
| IP100024387 | 241  | 235  |                                          | unsp+cdk5+p38MAPK-> unsp+GSK3+cdk5+p38MAPK     |                            | 3169   | FOX1A     | fnfcdvkarSpdkpgkgsyw    |
| IP100024387 | 241  | 243  | PKA->                                    |                                                |                            | 3169   | FOX1A     | arspdkpgkGsywthpdsng    |
| IP100024387 | 241  | 244  | EGFR->                                   | EGFR->                                         |                            | 3169   | FOX1A     | rspdkpgkGsywthpdsngm    |
| IP100024466 | 1034 | 1029 | unsp-> PKA                               | unsp->                                         |                            | 56886  | UGGT1     | rvfmcqsksldmplksfry     |
| IP100024466 | 1034 | 1035 | unsp+PKC-> PKC                           | unsp+PKC-> PKC                                 |                            | 56886  | UGGT1     | qskldmplksfryrylepi     |
| IP100024568 | 1057 | 1052 | unsp+cdc2->cdc2                          | unsp+cdc2->cdc2                                |                            | 29998  | GLTSCR1   | lptlnvkaaSSgqkpsqlq     |
| IP100024623 | 284  | 289  | unsp+DNAPK->DNAPK                        | unsp+DNAPK->DNAPK                              |                            | 36     | ACADSB    | lghgykaiG5Inegriqlaa    |
| IP100024662 | 106  | 110  | unsp+PKA+RSK->PKA+RSK                    | unsp+PKA+RSK-> unsp+RSK                        | Uniprot PhosphoSite        | 23468  | CBP5      | dikskkreqG5ndiarqfgrg   |
| IP100024664 | 184  | 177  |                                          | unsp+PKC-> unsp+PKA+PKA                        |                            | 8078   | USP5      | qawdgvevqvSKhatslkqld   |
| IP100024664 | 184  | 182  | unsp+PKC+PKA-> unsp+PKA                  | unsp+PKC+PKA-> unsp+PKA                        |                            | 8078   | USP5      | evrvqskhaSKlkldnpari    |
| IP100024670 | 162  | 166  | PKC->                                    |                                                |                            | 7905   | REEP5     | vkldkdkakeTadaikaeakk   |
| IP100024670 | 164  | 166  | PKC-> PKC+CKII                           |                                                |                            | 7905   | REEP5     | vkldkdkakeTadaikaeakk   |
| IP100024672 | 308  | 307  |                                          | PKC-> ATM+DNAPK                                |                            | 5599   | MAPK8     | llskmlvidaSKrisvdeaiq   |
| IP100024672 | 308  | 311  | unsp+PKA-> unsp+CKII+PKA                 | unsp+PKA-> unsp+CKII+PKA                       |                            | 5599   | MAPK8     | mlvidasknSvdeaiqhpvy    |
| IP100024787 | 291  | 290  |                                          | PKC->                                          |                            | 11001  | SLC27A2   | ivagatlarlTKfasqfwdw    |
| IP100024787 | 291  | 293  | PKC+PKG-> CKI+PKC                        | PKC+PKG-> CKI                                  |                            | 11001  | SLC27A2   | gatlarlTKTKfasqfwdwdrck |
| IP100024871 | 11   | 10   |                                          | unsp+CKII->ATM+unsp+CKII                       |                            | 865    | CBP5      | nmrvvqdrSKifeneefrk     |
| IP100024884 | 261  | 252  |                                          | cdc2->                                         |                            | 6725   | SRMS      | gewewglwGslpvaikvikis   |
| IP100024933 | 40   | 38   | unsp+GSK3+cdk5->GSK3+cdk5                | unsp+GSK3+cdk5->GSK3+cdk5                      | iprot PhosphoELM PhosphoSi | 6136   | RPL12     | lapkigplG5pkkvygdidiak  |
| IP100024933 | 54   | 59   | unsp+PKC+PKA-> unsp+PKC                  | unsp+PKC+PKA-> unsp+PKC+cdc2+PKA               |                            | 6136   | RPL12     | atgdwglntTkvictinqra    |
| IP100024971 | 103  | 99   | PKG-> PKA                                |                                                |                            | 5007   | OSBP      | saregwlfkwTnyikgyqrwr   |
| IP100024971 | 103  | 101  |                                          | -> unsp                                        |                            | 5007   | OSBP      | regwlfkwTnyikgyqrwr     |
| IP100024975 | 797  | 798  | ->CKII                                   | ->CKII                                         |                            | 56992  | KIF15     | etqtkndfklSevhdlrvli    |
| IP100024975 | 1009 | 1007 | unsp+PKC-> unsp                          | unsp+PKC->                                     |                            | 56992  | KIF15     | svcektetidTKkeeldinc    |
| IP100024993 | 118  | 112  | INSR->                                   | INSR->                                         |                            | 1892   | ECHS1     | emqnlsgfqcTKsfklhwdh    |
| IP100024993 | 118  | 113  |                                          | unsp+PKC-> PKC                                 |                            | 1892   | ECHS1     | mqnlsgfqcTKsfklhwdh     |
| IP100024993 | 118  | 114  | PKC->                                    | PKC->                                          |                            | 1892   | ECHS1     | qnlsfadcysSKflkhwdh     |
| IP100025019 | 204  | 209  | PKG+PKA+CKII->CKII                       | PKG+PKA+CKII->PKG+cdc2+CKII                    |                            | 5689   | PSMB1     | amrvldkrfiSaaderdytgd   |
| IP100025084 | 179  | 183  | unsp->                                   | unsp->                                         |                            | 826    | CAPNS1    | rwaiyqkfdTdrstgcsse     |
| IP100025087 | 120  | 116  | PKC->                                    |                                                |                            | 7157   | TP53      | sygrifghSGtaksvtcty     |
| IP100025087 | 120  | 118  | PKC->cdc2                                | PKC->                                          |                            | 7157   | TP53      | grifghSGTaksvtctysp     |
| IP100025087 | 120  | 121  | unsp-> unsp+PKC                          | unsp-> unsp+PKC                                |                            | 7157   | TP53      | lgflhsgtakSvtctyspaln   |
| IP100025087 | 164  | 163  | unsp->                                   | ATM+PKC+cdc2->ATM+cdc2+DNAPK                   |                            | 7157   | TP53      | pgtrvramaiTKsqhmttevv   |
| IP100025087 | 164  | 166  |                                          | unsp+PKC->                                     |                            | 7157   | TP53      | rvramaiTKsqhmttevvrrc   |
| IP100025087 | 305  | 303  | unsp+PKC->                               | unsp+PKC->                                     |                            | 7157   | TP53      | gephelpgSKtralnnts      |
| IP100025087 | 305  | 313  | ->cdc2                                   | ->cdc2                                         |                            | 7157   | TP53      | stkralnntSSspqkklp      |
| IP100025087 | 319  | 313  |                                          | ->cdc2                                         |                            | 7157   | TP53      | stkralnntSSspqkklp      |
| IP100025087 | 319  | 314  | PKC+cdc2->                               | PKC+cdc2->cdc2                                 |                            | 7157   | TP53      | stkralnntSSspqkklp      |
| IP100025087 | 319  | 315  | unsp-> unsp+cdk5                         |                                                | PhosphoELM PhosphoSite     | 7157   | TP53      | kralpnntSSpqqkklp       |
| IP100025087 | 320  | 313  | ->cdc2                                   |                                                | PhosphoSite                | 7157   | TP53      | stkralnntSSpqqkklp      |
| IP100025087 | 320  | 315  | unsp->                                   | unsp->                                         | PhosphoELM PhosphoSite     | 7157   | TP53      | stkralnntSSpqqkklp      |
| IP100025087 | 321  | 313  | ->cdc2                                   |                                                | PhosphoSite                | 7157   | TP53      | stkralnntSSpqqkklp      |
| IP100025087 | 321  | 314  |                                          | PKC+cdc2->PKC                                  |                            | 7157   | TP53      | stkralnntSSpqqkklp      |
| IP100025087 | 370  | 366  | unsp+RSK-> unsp+PKA+RSK                  |                                                | PhosphoSite                | 7157   | TP53      | gkepgsgrahSshlkskqgs    |
| IP100025087 | 372  | 366  |                                          | unsp+RSK-> unsp                                |                            | 7157   | TP53      | gkepgsgrahSshlkskqgs    |
| IP100025087 | 372  | 376  |                                          | unsp+PKC-> unsp+PKC+cdc2                       |                            | 7157   | TP53      | sshlkskqgSKstrhklmfk    |
| IP100025087 | 373  | 371  | unsp+PKC+cdc2-> unsp+cdc2                | unsp+PKC+cdc2-> unsp+cdc2                      | PhosphoELM PhosphoSite     | 7157   | TP53      | gsrahshlkskqgstrhklmfk  |
| IP100025087 | 373  | 376  | unsp+PKC-> unsp+PKC+cdc2                 | unsp+PKC-> unsp+PKC+cdc2                       | PhosphoELM PhosphoSite     | 7157   | TP53      | sshlkskqgSKstrhklmfk    |
| IP100025087 | 381  | 378  | PKC->                                    |                                                | PhosphoELM PhosphoSite     | 7157   | TP53      | hslkskqgSKstrhklmfk     |
| IP100025087 | 382  | 378  | PKC->                                    | PKC-> unsp+PKC                                 | PhosphoELM PhosphoSite     | 7157   | TP53      | hslkskqgSKstrhklmfk     |
| IP100025087 | 386  | 387  |                                          | -> unsp                                        | PhosphoSite                | 7157   | TP53      | trhklmfkTKegpdsd---     |
| IP100025091 | 38   | 37   | INSR->                                   |                                                | Uniprot PhosphoSite        | 6205   | RPS11     | etgkelpkprYknlgfktpt    |
| IP100025091 | 45   | 37   | INSR->                                   | INSR->                                         | Uniprot PhosphoSite        | 6205   | RPS11     | etgkelpkprYknlgfktpt    |
| IP100025252 | 94   | 89   | PKC->                                    |                                                |                            | 2923   | PDIA3     | plakvdctantTntcnkyvgvsg |
| IP100025252 | 94   | 95   | INSR+unsp->INSR                          | INSR+unsp->INSR                                |                            | 2923   | PDIA3     | ctantntcnkyvgvsgyptkif  |
| IP100025252 | 94   | 98   | ->cdc2                                   | ->cdc2                                         |                            | 2923   | PDIA3     | ntntcnkyvgvsgyptkifrd   |
| IP100025252 | 104  | 98   | ->PKA                                    | ->cdc2+PKA                                     |                            | 2923   | PDIA3     | ntntcnkyvgvsgyptkifrd   |
| IP100025252 | 104  | 100  |                                          | ->EGFR                                         |                            | 2923   | PDIA3     | ntcnkyvgvsgyptkifrdge   |
| IP100025252 | 104  | 102  | unsp+PKC->                               | unsp+PKC->                                     |                            | 2923   | PDIA3     | cnkyvgvsgyptTKfrdgeda   |
| IP100025273 | 350  | 348  | unsp->                                   | INSR-> unsp+INSR                               | Uniprot PhosphoSite        | 2618   | GART      | vmaskyggpTKygvteifp     |
| IP100025273 | 350  | 349  | unsp->                                   | unsp->DNAPK                                    |                            | 2618   | GART      | maskyggpTKygvteifp      |
| IP100025307 | 123  | 124  | unsp->SRC+unsp                           | unsp->SRC+unsp                                 |                            | 1593   | CYP27A1   | leqvmrpegkYpvrmdelwk    |
| IP100025329 | 80   | 84   | PKC+PKG+PKA->PKG+PKA                     | PKC+PKG+PKA-> PKC+PKG                          |                            | 6143   | RPL19     | rhmigkrgkYTanampekvt    |
| IP100025341 | 132  | 129  | ->CKII                                   |                                                |                            | 622    | BDH1      | evkevveivrsSikdpkegmw   |
| IP100025341 | 132  | 130  | unsp+CKI+PKC-> unsp+CKI+PKA              | unsp+CKI+PKC-> unsp+CKI+PKA+DNAPK              |                            | 622    | BDH1      | vekvveivrsSikdpkegmw    |
| IP100025346 | 34   | 39   | unsp->                                   | unsp->cdc2                                     |                            | 5195   | PEX14     | iatavklqnSrvrgspatlr    |
| IP100025366 | 327  | 324  | unsp-> unsp+CKII                         |                                                |                            | 1431   | CS        | qlqkevgkdvSdekirdyiw    |
| IP100025366 | 327  | 331  | INSR+EGFR->INSR                          |                                                |                            | 1431   | CS        | kdvseklrdTWntnsgvr      |
| IP100025366 | 327  | 335  | DNAPK->cdc2+DNAPK                        |                                                |                            | 1431   | CS        | deklrdywnTnsgvrvpy      |
| IP100025366 | 382  | 381  |                                          | ->EGFR                                         |                            | 1431   | CS        | dprmfkvaqG5Kivpnvlqeq   |
| IP100025366 | 459  | 463  | unsp->                                   |                                                |                            | 1431   | CS        | steglmkfdvSKsg-----     |
| IP100025416 | 62   | 53   | unsp-> unsp+cdc2                         |                                                |                            | 72     | ACTG2     | qvmvgmqkdSVyvdeagksr    |
| IP100025416 | 62   | 61   | unsp+PKC+cdc2-> unsp+CKI+cdc2            | unsp+PKC+cdc2-> ATM+unsp+cdc2+DNAPK            |                            | 72     | ACTG2     | kdsyvdeagSKrgitltkyp    |
| IP100025416 | 327  | 324  | unsp+PKC+cdc2->cdc2                      | unsp+PKC+cdc2-> unsp+cdc2                      |                            | 72     | ACTG2     | mqkeitalapStmkikiapp    |
| IP100025416 | 327  | 325  | PKC->                                    | PKC->                                          |                            | 72     | ACTG2     | qkeitalapsTmkikiappe    |
| IP100025491 | 54   | 56   | unsp+PKG+PKA->                           | unsp+PKG+PKA-> unsp                            |                            | 1973   | E1FA41    | giyaygfekpSaiqqrailpc   |
| IP100025491 | 174  | 170  | ->INSR                                   | ->INSR                                         |                            | 1973   | E1FA41    | grvrdmlnrrY5spqikmfv    |
| IP100025491 | 174  | 172  | unsp+PKC+GSK3+RSK-> unsp+GSK3+RSK        | unsp+PKC+GSK3+RSK-> unsp+GSK3+cdk5+p38MAPK+RSK |                            | 1973   | E1FA41    | vdmlnrrY5spqikmfv       |
| IP100025491 | 174  | 175  | unsp->                                   | unsp->                                         |                            | 1973   | E1FA41    | mlnrrY5spqikmfv         |
| IP100025491 | 291  | 289  | PKC->                                    | PKC->                                          |                            | 1973   | E1FA41    | intrkrwdvTekmhadrftv    |
| IP100025512 | 123  | 121  | unsp+CKII->CKII                          | unsp+CKII->CKII                                |                            | 3315   | HSPB1     | vktdkgvveitGtqhheergdeh |
| IP100025546 | 227  | 225  | PKC->                                    | PKC->                                          |                            | 4520   | MTF1      | yrlikahqrhTgkftnceseq   |
| IP100025753 | 450  | 449  | PKG->                                    |                                                |                            | 1828   | DSG1      | tgkltknkvTKeqynmlggk    |
| IP100025753 | 450  | 453  | INSR+unsp->                              | INSR+unsp-> unsp                               |                            | 1828   | DSG1      | tklnkvteqYnmllgkyqgt    |
| IP100025849 | 101  | 104  | unsp+PKA-> unsp                          | unsp+PKA-> unsp+PKC+CKII                       |                            | 723972 | LOC723972 | nlsgnkikldStieplklen    |
| IP100025874 | 226  | 223  | ->PKA                                    |                                                |                            | 6184   | RPN1      | nrklasmevTKiglnpnts     |
| IP100025974 | 6    | 2    | PKC->                                    |                                                |                            | 128864 | CHMP4B    | -----mSvfglpagag        |
| IP100025974 | 114  | 111  |                                          | unsp+EGFR->EGFR                                |                            | 128866 | CHMP4B    | tnetvlknmgYaakamaaahd   |
| IP100026089 | 141  | 142  | unsp-> unsp+p38MAPK                      | unsp-> unsp+p38MAPK                            | Uniprot PhosphoSite        | 23451  | SF3B1     | ridfdadgdkTPdpkmnaryt   |
| IP100026089 | 333  | 332  |                                          | unsp+PKC-> ATM+unsp                            | Uniprot PhosphoSite        | 23451  | SF3B1     | sigetpTpgaSKrksrwdetp   |
| IP100026105 | 132  | 128  | CKI+PKC+PKA->CKI+PKA                     | CKI+PKC+PKA->CKI+PKA                           |                            | 6342   | SCP2      | algfemsksgSlgikfsdrt    |
| IP100026105 | 132  | 134  | PKC->CKI+PKC                             | PKC->CKI                                       |                            | 6342   | SCP2      | msksglikfSdrtiptdkhv    |
| IP100026105 | 142  | 140  | unsp+PKC->                               | unsp+PKC->                                     |                            | 6342   | SCP2      | gikfSdrtiptDkhvdlilnk   |
| IP100026105 | 173  | 174  | unsp->                                   |                                                |                            | 6342   | SCP2      | gyagkehmkYtkiehafaki    |
| IP100026105 | 282  | 281  | unsp-> unsp+DNAPK                        | unsp-> ATM+unsp+DNAPK                          |                            | 6342   | SCP2      | siikmvvgfGmSkearkcyek   |
| IP100026105 | 341  | 337  | PKC->                                    | PKC->                                          |                            | 6342   | SCP2      | gatvdrgdnTvggkwvnp      |
| IP100026105 | 470  | 473  | unsp->                                   | unsp->                                         |                            | 6342   | SCP2      | vkddpggkkaTWvvdvknkgk   |
| IP100026156 | 192  | 186  | ATM+unsp+DNAPK-> unsp+DNAPK              |                                                |                            | 3059   | HCL1S     | dykgetekheSqrdyakgfgg   |
| IP100026182 | 273  | 267  |                                          | PKC->cdc2                                      |                            | 830    | CAPZA2    | alrrqlpvtrTKidwnkilsy   |
| IP100026182 | 273  | 276  | unsp+PKC-> PKC                           | unsp+PKC-> PKC                                 |                            | 830    | CAPZA2    | rtkidwnkiiSykigkemaqna  |
| IP100026215 | 80   | 83   | unsp->                                   |                                                |                            | 2237   | FEN1      | rmengikpYVfddgkppqlk    |
| IP100026215 | 354  | 349  | unsp+PKC+cdc2+DNAPK-> PKC+PKA+cdc2+DNAPK | unsp+PKC+cdc2+DNAPK-> PKC+PKA+cdc2+DNAPK       |                            | 2237   | FEN1      | riddfkvgtvSissakrepe    |
| IP100026215 | 354  | 351  | PKC->                                    |                                                |                            | 2237   | FEN1      | riddfkvgtvSissakrepepk  |
| IP100026272 | 6    | 2    | PKC->                                    |                                                | Uniprot                    | 10105  | HIST1H2AM | -----mSvfglpagag        |
| IP100026309 | 27   | 19   | ->cdc2+PKA                               |                                                |                            | 51053  | GMNN      | geekieniknSVvrtikmi     |
| IP100026309 | 27   | 25   | unsp+PKC-> PKA                           | unsp+PKC-> PKA                                 |                            | 51053  | GMNN      | niknssvprTlkmnqpsag     |
| IP100026309 | 27   | 32   | unsp->                                   | unsp->cdc2                                     |                            | 51053  | GMNN      | prttikmiqSasgsvgrn      |
| IP100026314 | 648  | 651  | EGFR->                                   | EGFR->                                         | PhosphoSite                | 2934   | GSN       | fwealgkkaaYrtpsrpdkkk   |
| IP100026314 | 648  | 653  | PKC->                                    | PKC->                                          |                            | 2934   | GSN       | ealgkkaaYrtpsrpdkkkmd   |
| IP100026314 | 648  | 654  | unsp+GSK3+p38MAPK-> unsp+GSK3            | unsp+GSK3+p38MAPK-> unsp+p38MAPK               |                            | 2934   | GSN       | algkkaaYrtpsrpdkkkmda   |
| IP100026337 | 21   | 27   | unsp-> unsp+CKII                         |                                                |                            | 8498   | RANBP3    | fvrgdkgkqSpaeknlnds     |
| IP100026337 | 23   | 27   | unsp-> unsp+CKII                         |                                                |                            | 8498   | RANBP3    | fvrgdkgkqSpaeknlnds     |
| IP100026519 | 167  | 161  |                                          | CKII->                                         |                            | 10105  | PRF1      | sgoffictuToidwldknyvf   |
| IP100026559 | 199  | 194  | unsp+PKC-> unsp                          |                                                |                            | 7391   | USF1      | yspksseaprTdrckrraah    |
| IP100026559 | 199  | 195  | unsp+PKG+CKII-> unsp+CKII                |                                                |                            | 7391   | USF1      | yspksseaprTdrckrraah    |
| IP100026665 | 327  | 323  |                                          | unsp+CKII->CKII                                |                            | 5859   | QARS      | ngicfrfddTnpekeakff     |
| IP100026689 | 6    | 4    | unsp+EGFR-> unsp                         |                                                | Uniprot PhosphoSite        | 983    | CDK1      | -----medyTKiekieggt     |
| IP100026689 | 6    | 5    |                                          | CKII->ATM+CKII                                 | Uniprot PhosphoSite        | 983    | CDK1      | -----medyTKiekieggt     |
| IP100026781 | 213  | 207  | unsp+CKI->                               |                                                |                            |        |           |                         |

Table S3

|             |      |      |                                     |                                     |        |          |                         |
|-------------|------|------|-------------------------------------|-------------------------------------|--------|----------|-------------------------|
| IP100026781 | 298  | 295  | unsp+PKC->                          | unsp+PKC->                          | 2194   | FASN     | esfeyieahgTgtkvdpqdel   |
| IP100026781 | 298  | 297  |                                     | unsp+PKC-> unsp+PKC+DNAPK           | 2194   | FASN     | feiyehahtgTkvdpqdelng   |
| IP100026781 | 528  | 519  | unsp+PKA-> unsp+cdc2+PKA            |                                     | 2194   | FASN     | slmrldrrdSilrsdeavkp    |
| IP100026781 | 528  | 523  | unsp+PKC-> unsp                     | unsp+PKC->                          | 2194   | FASN     | ldfrdrlsilrSdeavkpfkfg  |
| IP100026781 | 1704 | 1707 | unsp+EGFR->                         | unsp+EGFR-> EGFR                    | 2194   | FASN     | ttvysaiea9aTqartpdis    |
| IP100026781 | 1752 | 1747 | unsp+CKII-> PKA+CKII                | unsp+CKII-> PKA+CKII                | 2194   | FASN     | gpgkvgdlnSlaeekqasv     |
| IP100026781 | 1771 | 1775 |                                     | ATM+DNAPK-> ATM+cdc2+DNAPK          | 2194   | FASN     | rfliegldfTsqhplgnmaf    |
| IP100026781 | 1878 | 1874 | PKC-> PKA                           | PKC-> unsp+PKC+PKA                  | 2194   | FASN     | vlkgakpklmsSaisktfcph   |
| IP100026781 | 1878 | 1877 |                                     | -> DNAPK                            | 2194   | FASN     | gakpklmsaisktfcphaksy   |
| IP100026781 | 1878 | 1879 | -> cdc2                             | -> cdc2                             | 2194   | FASN     | kpldmsaisktfcphaksyil   |
| IP100026781 | 1995 | 1997 | PKA->                               | PKA->                               | 2194   | FASN     | ffqdvckpkySgtlnldrvtr   |
| IP100026940 | 83   | 89   | PKA-> cdc2+PKA                      | PKA-> cdc2+PKA                      | 10762  | NUP50    | gagkgplegISngnntsapp    |
| IP100026940 | 275  | 268  | unsp-> unsp+cdc2                    |                                     | 10762  | NUP50    | ktdpslsgatSasfnfkkvvd   |
| IP100026940 | 275  | 279  | unsp+cdc2-> cdc2                    |                                     | 10762  | NUP50    | asfnfkkvdsSvlgslssvp    |
| IP100026940 | 275  | 280  | unsp+PKC->                          | unsp+PKC-> cdc2                     | 10762  | NUP50    | sfnfkkvdsSvlgslssvp     |
| IP100026940 | 276  | 268  | unsp-> unsp+cdc2                    |                                     | 10762  | NUP50    | ktdpslsgatSasfnfkkvvd   |
| IP100026940 | 276  | 279  | unsp+cdc2-> cdc2                    | unsp+cdc2-> cdc2                    | 10762  | NUP50    | asfnfkkvdsSvlgslssvp    |
| IP100026940 | 276  | 280  | unsp+PKC->                          | unsp+PKC-> unsp+PKC+cdc2            | 10762  | NUP50    | sfnfkkvdsSvlgslssvp     |
| IP100026952 | 752  | 757  |                                     | unsp+PKA-> unsp+GSK3+PKA            | 11187  | PKP3     | klifikkrdSpdseksraa     |
| IP100026970 | 139  | 138  |                                     | PKC-> ATM+PKC+DNAPK                 | 11198  | SUPT16H  | skngkkgvISkdkfpgefmk    |
| IP100026970 | 513  | 508  | unsp+PKC+PKG+PKA+RSK-> unsp+PKG+PKA | unsp+PKC+PKG+PKA+RSK-> unsp+PKG+PKA | 11198  | SUPT16H  | geaqiqarkSvsvyknpslm    |
| IP100026970 | 513  | 511  | unsp+PKC-> unsp                     | unsp+PKC-> unsp                     | 11198  | SUPT16H  | qdiqarksmvSvynkpslmkpe  |
| IP100026970 | 513  | 516  | unsp-> cdc2                         | unsp+PKC-> unsp                     | 11198  | SUPT16H  | kksvnykpslmkpeh         |
| IP100026970 | 786  | 791  | unsp+CKI-> unsp+CKI+CKII            | unsp-> cdc2                         | 11198  | SUPT16H  | knfiekveaTlKeelefevpf   |
| IP100026970 | 904  | 899  | unsp->                              | unsp->                              | 11198  | SUPT16H  | cdliktegvqSlnwtkimkti   |
| IP100026970 | 904  | 903  |                                     | PKC-> DNAPK                         | 11198  | SUPT16H  | ytegvqslnwTkimktivddp   |
| IP100026970 | 904  | 908  | unsp->                              | unsp->                              | 11198  | SUPT16H  | qslnwtkimTivddpegfve    |
| IP100026970 | 907  | 903  | PKC->                               | PKC->                               | 11198  | SUPT16H  | ytegvqslnwTkimktivddp   |
| IP100027107 | 82   | 77   | PKC->                               | PKC->                               | 7284   | TUFM     | ghvdhgkttTaaikilaeg     |
| IP100027107 | 82   | 81   | ->CKI                               |                                     | 7284   | TUFM     | hgkttitaaTklaaeggak     |
| IP100027107 | 91   | 95   | unsp->                              |                                     | 7284   | TUFM     | aeggaKkKfveidnappeer    |
| IP100027146 | 457  | 455  | unsp+PKC->                          | unsp+PKC->                          | 2747   | GLUD2    | nlnhsvygtTfkyverdsyh    |
| IP100027146 | 527  | 524  | PKC->                               | PKC->                               | 2747   | GLUD2    | mersarqimhTamkynlgld    |
| IP100027223 | 321  | 319  | EGFR->                              |                                     | 3417   | IDH1     | hgtvtrthymYqkggetstnp   |
| IP100027223 | 321  | 325  | -> cdc2                             | -> cdc2                             | 3417   | IDH1     | hymyqkgqgeTstnpiasifa   |
| IP100027223 | 321  | 327  | -> cdc2                             |                                     | 3417   | IDH1     | rmymqkgqgeTstnpiasifawt |
| IP100027228 | 181  | 176  |                                     | ATM+cdc2+PKA-> cdc2+PKA             | 5188   | PET112L  | iygvagkkqSqvipktrvik    |
| IP100027230 | 613  | 607  | unsp+CKI-> unsp                     | unsp+CKI-> unsp                     | 7184   | HSP90B1  | kfdesekteSeaeakefep     |
| IP100027230 | 682  | 678  | unsp-> INSR+unsp                    | unsp-> INSR+unsp                    | 7184   | HSP90B1  | qtdgkdistnyYasqkktfein  |
| IP100027230 | 682  | 680  | ATM+unsp+PKC+DNAPK-> ATM+PKC+DNAPK  | ATM+unsp+PKC+DNAPK-> ATM+DNAPK      | 7184   | HSP90B1  | gkdistnyasqkktfeinor    |
| IP100027230 | 682  | 684  |                                     | PKC->                               | 7184   | HSP90B1  | stnyysqskTfeinrphli     |
| IP100027232 | 1088 | 1089 | unsp+PKC-> PKC                      | unsp+PKC-> PKC                      | 3480   | IGF1R    | melmtrgdlkSylsrIpeme    |
| IP100027270 | 77   | 74   | -> EGFR                             | -> EGFR                             | 6154   | RPL26    | ggqikqvqvYrkkyviyier    |
| IP100027280 | 367  | 371  | unsp+PKC-> PKC                      |                                     | 7155   | TOP2B    | vvkkknkagvSvkpfqvknhii  |
| IP100027280 | 373  | 371  | unsp+PKC-> PKC                      | unsp+PKC-> PKC                      | 7155   | TOP2B    | vvkkknkagvSvkpfqvknhii  |
| IP100027448 | 24   | 21   | PKC->                               |                                     | 10632  | ATP5L    | ktpalvnaavTyskprlatfw   |
| IP100027448 | 24   | 23   | ->PKA                               | -> ATM+DNAPK                        | 10632  | ATP5L    | palvnaavTyskprlatfwy    |
| IP100027448 | 24   | 29   | PKC+PKG->                           | PKC+PKG-> PKG                       | 10632  | ATP5L    | avtyskprlaTlwyaykvevl   |
| IP100027448 | 54   | 52   |                                     | PKC-> PKC+DNAPK                     | 10632  | ATP5L    | tpaeipnsaqtTfkykvevl    |
| IP100027448 | 54   | 62   | PKC->                               |                                     | 10632  | ATP5L    | tkivnsaqtTfkykvevl      |
| IP100027448 | 66   | 64   | PKC+PKA-> PKA                       | PKC+PKA-> PKA                       | 10632  | ATP5L    | kkivnsaqtSfkykveav      |
| IP100027451 | 365  | 370  | unsp+PKC-> unsp                     | unsp+PKC-> unsp                     | 2735   | GLI1     | kpyvklpgctTkrtydpssrl   |
| IP100027451 | 365  | 373  | unsp-> INSR+unsp                    |                                     | 2735   | GLI1     | vcklpgctkrTtdpslrrkhv   |
| IP100027451 | 371  | 370  | unsp+PKC->                          | unsp+PKC-> unsp                     | 2735   | GLI1     | kpyvklpgctTkrtydpssrl   |
| IP100027497 | 142  | 138  | unsp+PKG-> unsp+PKG+PKA+RSK         |                                     | 2821   | GPI      | kmksfcqrsvSgdwkygtygtk  |
| IP100027497 | 211  | 210  | PKC-> PKA+DNAPK                     | PKC-> DNAPK                         | 2821   | GPI      | npessifiaSKtfttqetit    |
| IP100027497 | 211  | 214  | unsp->                              | unsp->                              | 2821   | GPI      | sfliaskfTtqettinaet     |
| IP100027497 | 252  | 248  | PKC->                               | PKC->                               | 2821   | GPI      | avakhfvalstTnttkvefepi  |
| IP100027497 | 252  | 250  | unsp+PKC-> PKC                      | unsp+PKC->                          | 2821   | GPI      | akhfvalstnTtkvkefepidp  |
| IP100027497 | 252  | 251  | unsp+PKC-> unsp+DNAPK               | unsp+PKC-> unsp+DNAPK               | 2821   | GPI      | kfhfvalstnTtkvkefepidp  |
| IP100027547 | 68   | 63   | ->PKA                               | -> PKA                              | 117159 | DCD      | rqapkrqrqSsilekgldga    |
| IP100027547 | 68   | 64   | unsp+PKC+PKA+RSK-> unsp+PKA+RSK     |                                     | 117159 | DCD      | qapkrqrqSsilekgldga     |
| IP100027569 | 39   | 38   | ->DNAPK                             | -> ATM+DNAPK                        | 343069 | HNRNPCL1 | vkksdveaifSkkygiagcvs   |
| IP100027626 | 5    | 6    |                                     | -> unsp                             | 908    | CCT6A    | -----maavkTlnpkaeavara  |
| IP100027626 | 365  | 371  | ->PKA                               | -> PKA                              | 908    | CCT6A    | tfiecknnpSVdlilgpnk     |
| IP100027626 | 377  | 371  | ->PKA                               |                                     | 908    | CCT6A    | tfiecknnpSVdlilgpnk     |
| IP100027626 | 377  | 373  | ->PKA                               |                                     | 908    | CCT6A    | iecknnpSVdlilgpnk       |
| IP100027626 | 388  | 383  | PKC->                               | PKC->                               | 908    | CCT6A    | tlilgpnkhtTlitqkdavrd   |
| IP100027626 | 388  | 385  | PKC->                               | PKC->                               | 908    | CCT6A    | likgpnkhtTajikdavrldg   |
| IP100027681 | 39   | 35   | unsp+PKC+DNAPK-> unsp+DNAPK         |                                     | 4837   | NNMT     | ykgfgrshaeSqlihiklnl    |
| IP100027776 | 415  | 414  | PKC+PKA-> PKA                       | PKC+PKA-> DNAPK                     | 2235   | FECH     | plcvnnpvcreTksfttsqql   |
| IP100027834 | 269  | 267  | EGFR->                              | EGFR-> unsp+EGFR                    | 3191   | HNRNPCL  | ysgcctikieYakptrlnrvik  |
| IP100027834 | 269  | 271  | PKG->                               | PKG->                               | 3191   | HNRNPCL  | ctkieyakpTrlnrvknrdgd   |
| IP100027834 | 475  | 471  | cdc2-> PKA+cdc2                     | cdc2-> CKII+cdc2                    | 3191   | HNRNPCL  | pggsvleldgScsykdfseer   |
| IP100027834 | 475  | 473  | unsp+PKC+cdc2+CKII-> unsp+cdc2+CKII | unsp+PKC+cdc2+CKII-> unsp+cdc2+CKII | 3191   | HNRNPCL  | qsygleldgScsykdfseer    |
| IP100027834 | 552  | 544  | PKA-> cdc2+PKA                      | unsp+PKC+cdc2+CKII-> unsp+cdc2+CKII | 3191   | HNRNPCL  | vsgksersSksaletdgldg    |
| IP100027834 | 552  | 551  | unsp-> unsp+DNAPK                   | unsp-> unsp+DNAPK                   | 3191   | HNRNPCL  | rssglleweSksaletdgldg   |
| IP100027834 | 552  | 553  | CKII-> PKA+CKII                     | CKII-> PKA+CKII                     | 3191   | HNRNPCL  | ssglleweSksaletdgldg    |
| IP100027970 | 55   | 59   | unsp+PKC+cdc2-> cdc2                |                                     | 54039  | PCBP3    | rlmhkgvevgSiigkgetkv    |
| IP100027987 | 53   | 49   |                                     | unsp->                              | 59082  | CARD18   | dmnkvrndendTvmkcarvld   |
| IP100027987 | 64   | 68   | unsp->                              | unsp->                              | 59082  | CARD18   | ldvrtgkpgkScckfikhlee   |
| IP100027987 | 67   | 68   | unsp->                              | unsp->                              | 59082  | CARD18   | ldvrtgkpgkScckfikhlee   |
| IP100027988 | 18   | 13   |                                     | CKI->                               | 10664  | CTCF     | gdaveaiveeSetfikiqkerk  |
| IP100027988 | 18   | 15   | ->CKII                              |                                     | 10664  | CTCF     | aveaiveeSetfikiqkerk    |
| IP100027988 | 18   | 25   |                                     | INSR->                              | 10664  | CTCF     | tfikgkerktYarrregqee    |
| IP100027988 | 20   | 25   | INSR->                              | INSR->                              | 10664  | CTCF     | tfikgkerktYarrregqee    |
| IP100027996 | 472  | 470  | PKC+cdc2-> cdc2                     | PKC+cdc2-> cdc2                     | 79585  | CORO7    | lrsqslgpgSskfrhaagtv    |
| IP100027996 | 472  | 471  |                                     | -> DNAPK                            | 79585  | CORO7    | lrsqslgpgSskfrhaagtv    |
| IP100028006 | 68   | 76   | p38MAPK-> cdc2+p38MAPK              |                                     | 5690   | PSMB2    | lykrmnyelSptaaantrrr    |
| IP100028031 | 285  | 286  | unsp->                              | unsp->                              | 37     | ACADVL   | tsavpspcgkYttingsklwi   |
| IP100028031 | 285  | 287  | INSR-> unsp+INSR                    | INSR-> unsp+INSR                    | 37     | ACADVL   | savpspcgkYttingsklwi    |
| IP100028031 | 285  | 288  | PKC->                               | unsp+PKC-> ATM+unsp                 | 37     | ACADVL   | avpspcgkYttingsklwi     |
| IP100028031 | 285  | 292  | -> cdc2                             | -> unsp                             | 37     | ACADVL   | pcgkYttingSkwivngla     |
| IP100028091 | 240  | 245  | INSR+unsp-> unsp                    |                                     | 10096  | ACTR3    | cpdlvkefnYtdtdgskwikq   |
| IP100028091 | 251  | 250  | PKC-> DNAPK                         | PKC-> ATM+DNAPK                     | 10096  | ACTR3    | kefnkytdtdgSkwikqytgin  |
| IP100028091 | 254  | 250  | PKC->                               | PKC->                               | 10096  | ACTR3    | kefnkytdtdgSkwikqytgin  |
| IP100028127 | 8    | 12   | unsp+PKC-> unsp                     |                                     | 2113   | ETS1     | kaavdlkptTliktedvlie    |
| IP100028127 | 15   | 10   | ->PKA                               | -> PKA                              | 2113   | ETS1     | -mkaavdlkptTliktedvlie  |
| IP100028127 | 15   | 12   | unsp+PKC->                          |                                     | 2113   | ETS1     | kaavdlkptTliktedvlie    |
| IP100028127 | 18   | 16   | unsp+PKC->                          | unsp+PKC->                          | 2113   | ETS1     | dikpttikTekvdlieffps    |
| IP100028127 | 18   | 26   | -> cdc2                             |                                     | 2113   | ETS1     | tekvdlieffpsdmecadvpl   |
| IP100028127 | 305  | 303  | unsp+PKC+PKG-> PKG                  | unsp+PKC+PKG-> PKG                  | 2113   | ETS1     | zalnptkpgkTfkydvrdrad   |
| IP100028127 | 305  | 307  |                                     | -> unsp                             | 2113   | ETS1     | nhkpgktfkdVvdradlnkd    |
| IP100028414 | 119  | 126  | unsp+CKII-> unsp+PKA+CKII           |                                     | 9535   | GMFG     | eltkvfeirTddtleawleq    |
| IP100028520 | 81   | 82   |                                     | -> unsp                             | 4723   | NDUFV1   | gpdwilgeikTslgrgagag    |
| IP100028520 | 104  | 100  | PKC-> PKA                           | PKC-> PKA                           | 4723   | NDUFV1   | gagftglkwSfmnkpsdgrg    |
| IP100028520 | 104  | 106  | unsp+cdc2-> PKC+cdc2                |                                     | 4723   | NDUFV1   | glkwsfmnkpsdgrgkylvnn   |
| IP100028888 | 251  | 244  |                                     | INSR+unsp-> unsp                    | 3184   | HNRNPDP  | epvkkimekYthnvglskcei   |
| IP100028888 | 251  | 250  | unsp+PKC-> unsp                     | unsp+PKC-> ATM+unsp                 | 3184   | HNRNPDP  | mekkythnvglskceikvamsk  |
| IP100028888 | 341  | 337  |                                     | -> unsp                             | 3184   | HNRNPDP  | ygydyndqSvgykvsvrrgg    |
| IP100028888 | 341  | 339  |                                     | EGFR-> unsp+EGFR                    | 3184   | HNRNPDP  | ygydyndqSvgykvsvrrgg    |
| IP100028888 | 341  | 343  | unsp-> unsp+PKC                     |                                     | 3184   | HNRNPDP  | snqsgdygkvSrrghqhsnyk   |
| IP100028888 | 353  | 351  | unsp+cdc2-> cdc2                    | unsp+cdc2-> cdc2                    | 3184   | HNRNPDP  | ksvrrghqhsnyk           |
| IP100028912 | 362  | 366  | ->CKII                              |                                     | 7716   | VEZF1    | vtsvpgkqveTlriweeavka   |
| IP100028957 | 393  | 399  | unsp-> unsp+cdc2                    |                                     | 9354   | UBE4A    | yqmklnglqSpethclisw     |
| IP100029012 | 68   | 64   | unsp-> unsp+PKA+RSK                 |                                     | 8661   | EIF3A    | ylelcvdlrkShlakeglqy    |
| IP100029073 | 69   | 73   | unsp+PKC-> unsp                     |                                     | 26471  | NUPR1    | erklvtklqnSerkrgarr     |
| IP100029073 | 76   | 73   | unsp+PKC-> PKC                      | unsp+PKC-> unsp                     | 26471  | NUPR1    | erklvtklqnSerkrgarr     |
| IP100029073 | 77   | 73   | unsp+PKC-> unsp                     | unsp+PKC-> unsp                     | 26471  | NUPR1    | erklvtklqnSerkrgarr     |
| IP100029079 | 9    | 8    |                                     | -> ATM                              | 8833   | GMPS     | ---malcngdSklenagddlk   |
| IP100029081 | 316  | 317  |                                     | -> unsp                             | 3980   | LIG3     | vklllpgvikTynlnndkqv    |
| IP100029133 | 221  | 226  | PKA->                               | PKA->                               | 515    | ATP5F1   | inwvehkvvgSistqgeketi   |
| IP100029196 | 384  | 390  | PKC-> PKC+PKA                       |                                     | 5588   | PRKCC    | filhkmllgkgSfgkvflaefk  |
| IP100029400 | 54   | 50   | PKC->                               |                                     | 9406   | ZRANB2   | teakmmkaggTeigktlaeks   |
| IP100029400 | 54   | 55   |                                     | PKC-> unsp+PKC                      | 9406   | ZRANB2   | mkaggteigktlaeksrlgfs   |
| IP100029447 | 124  | 118  |                                     | INSR->                              | 9527   | GOSR1    | lqhrdildqTthefhtkan     |
| IP100029447 | 124  | 125  |                                     | -> unsp+PKC                         | 9527   | GOSR1    | lqdythefhtkanfmaier     |
| IP100029484 | 439  | 433  | PKC+RSK-> PKC+PKA+RSK               | PKC+RSK-> PKC+cdc2+RSK              | 9203   | ZMYM3    | snsgsvhrnC5dsdskfran    |

Table S3

|             |      |      |                                        |       |          |                        |
|-------------|------|------|----------------------------------------|-------|----------|------------------------|
| IP100029484 | 439  | 438  | PKC->                                  | 9203  | ZMYM3    | vhrlcsdcfSkfranklglt   |
| IP100029485 | 230  | 233  | unsp+PKC->PKC                          | 1639  | DCTN1    | qvrdeekleTlrkraedka    |
| IP100029534 | 81   | 75   | CKII->                                 | 5471  | PPAT     | kmglnvnhvTdnllklyvs    |
| IP100029534 | 81   | 83   | INSR+unsp->unsp                        | 5471  | PPAT     | vftednllklyvsnlgnlghtr |
| IP100029534 | 81   | 85   | ->cdc2                                 | 5471  | PPAT     | tednllklyvsnlgnlghtr   |
| IP100029561 | 242  | 241  | ->EGFR                                 | 4705  | NDUFA10  | saylqdiensYkktflpemse  |
| IP100029561 | 242  | 244  | PKG->                                  | 4705  | NDUFA10  | lqdiensaykktflpemsecke |
| IP100029561 | 243  | 241  | ->unsp                                 | 4705  | NDUFA10  | saylqdiensYkktflpemse  |
| IP100029561 | 243  | 244  | PKG->                                  | 4705  | NDUFA10  | lqdiensaykktflpemsecke |
| IP100029601 | 144  | 141  | ->EGFR                                 | 2017  | CTTN     | rvdqsavgfegqktekhasq   |
| IP100029601 | 161  | 156  | unsp->                                 | 2017  | CTTN     | ekhasqkdySgfggkyqvga   |
| IP100029601 | 198  | 191  | INSR->                                 | 2017  | CTTN     | ktekhesqrdYskgfgkygid  |
| IP100029601 | 198  | 192  | unsp->unsp+PKA                         | 2017  | CTTN     | tekesqrdYskgfggkygid   |
| IP100029601 | 218  | 215  | ->EGFR                                 | 2017  | CTTN     | kvdkesavgfegqktekhesq  |
| IP100029601 | 272  | 277  | unsp+PKC->PKC                          | 2017  | CTTN     | qgfggkyqvSerdssavgf    |
| IP100029601 | 304  | 303  | unsp->                                 | 2017  | CTTN     | lakeshqqdySkfggkyqvga  |
| IP100029623 | 102  | 103  | unsp->                                 | 5687  | PSMA6    | raryeaanwYkygyeipvdm   |
| IP100029623 | 104  | 103  | unsp->                                 | 5687  | PSMA6    | raryeaanwYkygyeipvdm   |
| IP100029623 | 104  | 107  | unsp->                                 | 5687  | PSMA6    | eaanwkykygyeipvdmclcr  |
| IP100029629 | 273  | 272  | unsp->                                 | 7706  | TRIM25   | kikeekrvnSskftdyqill   |
| IP100029629 | 273  | 278  | INSR+unsp+EGFR->unsp+EGFR              | 7706  | TRIM25   | krvnskftdyYlllkkkse    |
| IP100029629 | 320  | 318  | unsp+PKG+PKA->PKG+PKA                  | 7706  | TRIM25   | lekaskirgYStkpyyipeve  |
| IP100029629 | 320  | 319  | unsp+PKG+PKA->PKG+PKA                  | 7706  | TRIM25   | ekaskirgYStkpyyipeve   |
| IP100029629 | 567  | 568  | unsp+PKC->PKC+DNAPK                    | 7706  | TRIM25   | isawhnnvckTlpskatzrg   |
| IP100029631 | 12   | 11   | unsp+PKC->unsp                         | 2079  | ERH      | mshltlvpqTkrpegrtad    |
| IP100029697 | 297  | 306  | unsp+CKII->unsp+cdc2+CKII              | 5393  | EXOC59   | kfmeaplditSdveekaeii   |
| IP100029731 | 8    | 7    | PKG+PKA+RSK->PKA+RSK                   | 6165  | RPL35A   | -----mrglrwSkalfaykrg  |
| IP100029733 | 246  | 251  | PKG+PKA+p38MAPK->p38MAPK               | 1645  | AKR1C1   | lcalakhhkrTlalialyql   |
| IP100029737 | 89   | 88   | unsp+PKC->CKI+PKC                      | 2182  | ACSL4    | tidklfthavSkfgkksdlsq  |
| IP100029737 | 92   | 88   | unsp+PKC->unsp                         | 2182  | ACSL4    | tidklfthavSkfgkksdlsq  |
| IP100029737 | 92   | 95   | PKA->                                  | 2182  | ACSL4    | tidklfthavSkfgkksdlsq  |
| IP100029744 | 103  | 99   | SRC+unsp->unsp+EGFR                    | 6742  | SSBP1    | vfrplrdvayYvkkgsryle   |
| IP100029744 | 103  | 101  | SRC+unsp->unsp                         | 6742  | SSBP1    | vfrplrdvayYvkkgsryle   |
| IP100029744 | 104  | 99   | SRC+unsp->unsp                         | 6742  | SSBP1    | vfrplrdvayYvkkgsryle   |
| IP100029744 | 113  | 116  | INSR+EGFR->                            | 6742  | SSBP1    | srlylegkidYgeymdknnrv  |
| IP100029745 | 276  | 273  | unsp->                                 | 4774  | NFIA     | rrslpststSstkrksved    |
| IP100029745 | 276  | 275  | unsp+PKC->unsp+PKC+DNAPK               | 4774  | NFIA     | slpstststSstkrksvedem  |
| IP100029750 | 37   | 34   | PKC->                                  | 6229  | RPS24    | vidvlhpqkaTvpkteirekl  |
| IP100029764 | 489  | 492  | unsp->                                 | 10946 | SF3A3    | ssgnvnvknktVedtkragll  |
| IP100029795 | 280  | 276  | PKC+cdc2->                             | 4782  | NFIC     | gllrTlpsstSsgskrhksgs  |
| IP100029795 | 280  | 277  | unsp+PKC+cdc2->cdc2                    | 4782  | NFIC     | lrrtTlpsstSsgskrhksgs  |
| IP100029795 | 280  | 279  | unsp+PKC->ATM+unsp+PKC+DNAPK           | 4782  | NFIC     | rlpsstssgSKrhksgsmee   |
| IP10002997  | 180  | 178  | unsp+GSK3+cdk5->unsp+GSK3+cdk5+p38MAPK | 25796 | PGLS     | rekivapsdSpkppqrvtl    |
| IP10002997  | 180  | 189  | unsp+GSK3+cdk5->unsp+GSK3+cdk5+p38MAPK | 25796 | PGLS     | pkppqrvtlTlvpnaartv    |
| IP100030131 | 207  | 208  | unsp+cdk5+RSK->unsp+cdk5+p38MAPK       | 7112  | TMPO     | kreplgrakTvpvlkarrve   |
| IP100030131 | 207  | 211  | unsp+PKC->PKC                          | 7112  | TMPO     | plkgatpvtTlqqrvehnq    |
| IP100030179 | 161  | 159  | unsp+EGFR->                            | 1E+08 | RPL7P32  | vkenlykrgYgkinckria    |
| IP100030247 | 390  | 388  | unsp+PKC+PKG->unsp+PKG+PKA             | 904   | CCMT1    | nksvpspsakYSkfeyrakhae |
| IP100030274 | 499  | 490  | unsp+PKG+CKII->unsp+PKG+cdc2+CKII      | 84081 | CDCD55   | snvkrnqekpSnseslgaek   |
| IP100030274 | 499  | 492  | unsp->unsp+cdc2                        | 84081 | CDCD55   | kernqekpsSeslgaekhr    |
| IP100030274 | 499  | 495  | unsp+PKC->unsp                         | 84081 | CDCD55   | nqekpsnesSlgahrhrtee   |
| IP100030274 | 499  | 503  | unsp->CKI                              | 84081 | CDCD55   | esslgaekhrTeegqekgkq   |
| IP100030275 | 87   | 84   | unsp+PKC->unsp                         | 10131 | TRAP1    | iisstevqgStskhefaet    |
| IP100030275 | 87   | 85   | unsp+PKC->                             | 10131 | TRAP1    | iisstevqgStskhefaet    |
| IP100030275 | 87   | 86   | unsp+CKII->unsp                        | 10131 | TRAP1    | sstevqgStskhefaetakk   |
| IP100030275 | 332  | 328  | PKG->PKA                               | 10131 | TRAP1    | vaqahdkpYrThyktdapin   |
| IP100030275 | 332  | 333  | ->CKII                                 | 10131 | TRAP1    | dkprythyktTdaplnrsl    |
| IP100030275 | 382  | 377  | PKC->                                  | 10131 | TRAP1    | srkvlktgTdlpklwrl      |
| IP100030275 | 431  | 430  | unsp+PKC->ATM+unsp+PKC+DNAPK           | 10131 | TRAP1    | qrlklfddqSkkdaeyakf    |
| IP100030275 | 432  | 430  | unsp+PKC->unsp+CKII                    | 10131 | TRAP1    | qrlklfddqSkkdaeyakf    |
| IP100030275 | 466  | 470  | unsp->                                 | 10131 | TRAP1    | vkeadiaklrYessalsqgl   |
| IP100030363 | 83   | 90   | INSR+unsp->unsp                        | 38    | ACAT1    | gldkeevkeayYmgvnlqggee |
| IP100030363 | 124  | 120  | PKC->                                  | 38    | ACAT1    | gaglipstpcTlunkvcasgm  |
| IP100030363 | 124  | 128  | PKC->                                  | 38    | ACAT1    | pcttinkvcaSgmkaimmasq  |
| IP100030363 | 181  | 185  | PKC->                                  | 38    | ACAT1    | ledivkdglTdyvknihmgs   |
| IP100030363 | 181  | 188  | PKC->                                  | 38    | ACAT1    | ledivkdglTdyvknihmgs   |
| IP100030363 | 190  | 185  | PKC->                                  | 38    | ACAT1    | ledivkdglTdyvknihmgs   |
| IP100030363 | 190  | 188  | INSR->                                 | 38    | ACAT1    | livkdglTdyvknihmgs     |
| IP100030363 | 202  | 200  | unsp->                                 | 38    | ACAT1    | knhmgscaenTakklname    |
| IP100030363 | 251  | 256  | SRC+unsp+EGFR->SRC+unsp                | 38    | ACAT1    | pdvrvvkedeeYkrvdfskvpk |
| IP100030363 | 263  | 262  | PKC->                                  | 38    | ACAT1    | edeeYkrvdfskvpklvtqf   |
| IP100030702 | 343  | 340  | unsp->unsp+PKA                         | 3419  | IDH3A    | acfatikdgkStklldgnak   |
| IP100030702 | 343  | 342  | ->ATM+DNAPK                            | 3419  | IDH3A    | fatikdgkStklldgnakcs   |
| IP100030706 | 212  | 210  | unsp+PKG->PKG                          | 10598 | AHS1     | vgvypctkiTiketfltspe   |
| IP100030915 | 601  | 599  | unsp+PKC->PKC                          | 9101  | USP8     | phvpsvtdgSgkpfklsqg    |
| IP100031023 | 21   | 16   | unsp+PKC->unsp                         | 2311  | IL11     | lvrlfrvqdlSndtfggyfp   |
| IP100031489 | 58   | 54   | unsp->INSR+unsp                        | 10289 | EF1B     | lttvagiddYdkklvkafk    |
| IP100031519 | 235  | 227  | unsp+PKC->unsp+PKC+PKA                 | 1786  | DNMT1    | pritrkstrqTtshfakop    |
| IP100031519 | 235  | 231  | PKC->                                  | 1786  | DNMT1    | rkrtrgttTshfakopakrk   |
| IP100031519 | 1173 | 1167 | unsp+GSK3+cdk5->unsp+GSK3              | 1786  | DNMT1    | sfedppnharSpngkagkgk   |
| IP100031522 | 303  | 298  | ->INSR                                 | 3030  | HADHA    | ekvrkqtglYpapliidvv    |
| IP100031522 | 309  | 310  | CKII->unsp+CKII                        | 3030  | HADHA    | apliidvvkTgieqsdagay   |
| IP100031522 | 326  | 324  | ATM+unsp+cdc2+DNAPK->ATM+cdc2+DNAPK    | 3030  | HADHA    | qgsdgylicSgkfgelvmntk  |
| IP100031522 | 373  | 373  | unsp+PKA->unsp                         | 3030  | HADHA    | qevydkldistSstsfpgv    |
| IP100031522 | 569  | 573  | unsp+PKA->PKA                          | 3030  | HADHA    | qevydkldistSstsfpgv    |
| IP100031522 | 644  | 637  | INSR+EGFR->EGFR                        | 3030  | HADHA    | flgrkskgfYfyvegykrkd   |
| IP100031522 | 728  | 724  | ->EGFR                                 | 3030  | HADHA    | lqgprfrvdlYgaqkivdkr   |
| IP100031522 | 728  | 736  | ->INSR                                 | 3030  | HADHA    | aqkivdkrYyaaYgkqftp    |
| IP100031526 | 146  | 145  | unsp+CKI->ATM+unsp+CKI                 | 79002 | C19orf43 | kqktedevitSkgdawakyma  |
| IP100031545 | 608  | 611  | unsp->unsp+CKII                        | 3709  | ITPR2    | nnrkllkhiTakeietfvs    |
| IP100031556 | 462  | 461  | PKC->DNAPK                             | 11338 | U2AF2    | grkfanrvrvYkycdpdsyhr  |
| IP100031562 | 6    | 2    | PKC->                                  | 92815 | HIST3H2A | -----mSgrgkqggar       |
| IP100031570 | 21   | 16   | cdc2->                                 | 84289 | C1orf57  | kvklatkvlgTkwfvrnryg   |
| IP100031801 | 96   | 94   | unsp+PKC->PKC                          | 8531  | CSDA     | kvklatkvlgTkwfvrnryg   |
| IP100031812 | 64   | 62   | unsp+PKC->PKC                          | 4904  | YBX1     | kvklatkvlgTkwfvrnryg   |
| IP100031812 | 81   | 80   | unsp->unsp+DNAPK                       | 4904  | YBX1     | ngygfnnrdTkedvfhqta    |
| IP100031820 | 349  | 346  | unsp+p38MAPK->p38MAPK                  | 2193  | FARSA    | lyrlaqklpTpvkyfsidrv   |
| IP100031820 | 349  | 352  | unsp->                                 | 2193  | FARSA    | kkpftpvkyfSidrvfmet    |
| IP100032164 | 69   | 62   | INSR->                                 | 8048  | CSR3     | heseyckvcYgrrygpkgig   |
| IP100032214 | 368  | 371  | unsp+CKI->CKI                          | 23774 | BRD1     | ymkmepevkelTggttfsvrk  |
| IP100032214 | 418  | 415  | unsp+PKG+cdc2+PKA+RSK->unsp+PKG+PKA    | 23774 | BRD1     | emkngvcrkeSsvktvrstsk  |
| IP100032214 | 418  | 416  | unsp+PKG->                             | 23774 | BRD1     | mknvgvcrkeSsvktvrstsk  |
| IP100032214 | 418  | 422  | PKG->                                  | 23774 | BRD1     | rkessvktvrStskvrkakk   |
| IP100032214 | 519  | 524  | unsp->unsp+EGFR                        | 23774 | BRD1     | emkaakeklYwqrhrlder    |
| IP100032230 | 405  | 401  | PKC->PKA                               | 23136 | EPB41L3  | lpeappkklTlgskfrysgr   |
| IP100032230 | 405  | 404  | PKC->PKC+DNAPK                         | 23136 | EPB41L3  | appkklTlgskfrysgrtqa   |
| IP100032230 | 405  | 409  | unsp+PKA->unsp+cdc2                    | 23136 | EPB41L3  | fltlsgkfrYsgrtqaqtra   |
| IP100032313 | 18   | 20   | unsp+PKG+CKII->unsp+CKI+CKII           | 6275  | S100A4   | dmvstfhkySgkgedkfln    |
| IP100032313 | 22   | 20   | unsp+PKG+CKII->unsp+PKG+PKA+CKII       | 6275  | S100A4   | dmvstfhkySgkgedkfln    |
| IP100032313 | 35   | 32   | ->CKII                                 | 6275  | S100A4   | dksgkflnYkktflpemse    |
| IP100032316 | 528  | 526  | unsp->cdc2                             | 23660 | ZKSCAN5  | ipmkellggsSkrmmysevp   |
| IP100032316 | 528  | 527  | unsp+PKC->PKC                          | 23660 | ZKSCAN5  | pmkellggsSkrmmysevp    |
| IP100032355 | 830  | 833  | unsp->                                 | 9698  | PUM1     | aapgaekyrSassasslfsps  |
| IP100032355 | 830  | 835  | unsp+PKC+PKA->unsp+PKA                 | 9698  | PUM1     | pgaeakyrSaasslfsps     |
| IP100032358 | 714  | 710  | PKC->                                  | 1E+08 | POM121C  | saspmfkplTlappksegep   |
| IP100032358 | 714  | 715  | unsp+CKII->unsp+CKI+CKII               | 1E+08 | POM121C  | fkplTlappksegeptppgp   |
| IP100032598 | 388  | 386  | unsp->unsp+CKII                        | 2117  | ETV3     | ipprkvepaSekdeslras    |
| IP100032598 | 388  | 392  | unsp+PKC->unsp                         | 2117  | ETV3     | vepasekdeslrasareake   |
| IP100032826 | 153  | 156  | unsp+PKC+PKA->PKC+PKA                  | 6767  | ST13     | tlaiyakraSvrlkqkqna    |
| IP100032827 | 29   | 31   | PKG+CKI->CKII                          | 51639 | SF3B1.4  | lyrnlpykTaeemdydfqk    |
| IP100032831 | 124  | 130  | unsp+p38MAPK->unsp                     | 9342  | SNAP29   | vnfyskpveTlpeegntts    |
| IP100032875 | 153  | 151  | PKC->CKII                              | 2110  | ETFDH    | pvterdrgilTekyrnpvpl   |
| IP100032892 | 25   | 29   | ->cdc2                                 | 9453  | GGPS1    | llqlpgkqvrTlqsafnhwl   |
| IP100032904 | 6    | 9    | PKC->                                  | 6620  | SNCB     | --mdvmfkglSmakegvva    |
| IP100032904 | 12   | 9    | PKC->PKA                               | 6620  | SNCB     | --mdvmfkglSmakegvva    |
| IP100032955 | 102  | 101  | unsp+PKC->PKC                          | 55905 | RNF114   | chgcrrnflSkirshvates   |
| IP100032955 | 102  | 105  | unsp->                                 | 55905 | RNF114   | rknlflskirShvateskyqn  |
| IP100032955 | 112  | 109  | PKC->                                  | 55905 | RNF114   | fskirsirvaTskysqnyime  |

Table S3

|             |      |      |                                    |                                      |        |           |                         |
|-------------|------|------|------------------------------------|--------------------------------------|--------|-----------|-------------------------|
| IP100032955 | 112  | 111  | PKC->PKC+DNAPK                     | PKC->ATM+DNAPK                       | 55905  | RNF114    | skirshvatcSKyqnyimegv   |
| IP100032955 | 112  | 113  | unsp->                             | unsp->                               | 55905  | RNF114    | irshvatcSKyqnyimegvka   |
| IP100032957 | 65   | 68   | INSR+unsp+EGFR->INSR+unsp          | INSR+unsp+EGFR->INSR+unsp            | 7329   | UBE2I     | fkrlmfkddYpssppckckfe   |
| IP100032957 | 65   | 71   | GSK3+cdc5->GSK3+cdc5+cdc2          |                                      | 7329   | UBE2I     | rmlfkddypSpppckckfepl   |
| IP100033016 | 158  | 151  | ->cdc2                             |                                      | 4609   | MYC       | kniiqldcmwSgfsaaakvS    |
| IP100033016 | 158  | 154  | PKC->                              | PKC->                                | 4609   | MYC       | liqdcmwSgfsaaakvSskl    |
| IP100033016 | 158  | 161  | unsp+PKC->                         | unsp+PKC->PKC                        | 4609   | MYC       | sgfsaaaklvSeklasyqaar   |
| IP100033016 | 163  | 161  | unsp+PKC->                         | unsp+PKC->                           | 4609   | MYC       | sgfsaaaklvSeklasyqaar   |
| IP100033016 | 163  | 166  | unsp->                             | unsp->                               | 4609   | MYC       | aaklvseklasyqaarkdsghs  |
| IP100033016 | 172  | 174  | unsp+PKG+PKA->unsp+PKA             |                                      | 4609   | MYC       | lasyqaarkdSgspnparghs   |
| IP100033016 | 172  | 176  |                                    | unsp->unsp+p38MAPK                   | 4609   | MYC       | syqaarkdsgSnnparghshvc  |
| IP100033016 | 290  | 294  | unsp+PKA->unsp                     | unsp+PKA->unsp                       | 4609   | MYC       | krqagpkrsSgspagghsk     |
| IP100033016 | 332  | 329  | unsp+PKC->                         | unsp+PKC->unsp                       | 4609   | MYC       | thqnyhaappStrkdypaavr   |
| IP100033016 | 332  | 330  | unsp+PKC->                         | unsp+PKC->                           | 4609   | MYC       | hqnmyaappStrkdypaavr    |
| IP100033016 | 338  | 334  | ->INSR                             | ->INSR+EGFR                          | 4609   | MYC       | yaappStrkdypaavrkdks    |
| IP100033030 | 21   | 19   | unsp+PKA+RSK->PKA+RSK              | unsp+PKA+RSK->PKA+RSK                | 11047  | ADRM1     | pslvpgsrgaSnkylvefrag   |
| IP100033030 | 21   | 22   | INSR->                             |                                      | 11047  | ADRM1     | vpgrsqasnYlvefragkms    |
| IP100033036 | 427  | 426  |                                    | PKA->ATM+DNAPK                       | 10988  | METAP2    | crnwldrlgeSkylmalnkic   |
| IP100033054 | 26   | 28   | unsp+PKA+RSK->unsp+RSK             | unsp+PKA+RSK->unsp+RSK               | 51496  | CTDSP2L   | qrtarakrySevdslpspgg    |
| IP100033054 | 26   | 33   | unsp->unsp+cdc2                    |                                      | 51496  | CTDSP2L   | akrkysevdSlpspggekpsk   |
| IP100033054 | 57   | 59   | PKC+PKA->PKC                       | PKC+PKA->PKC                         | 51496  | CTDSP2L   | issikfkfgStpkereenps    |
| IP100033217 | 707  | 705  | unsp->unsp+PKA                     | unsp->unsp+PKA                       | 10157  | AASS      | inlegymndStkyeayvigs    |
| IP100033217 | 707  | 707  | unsp->unsp+PKA+DNAPK               | unsp->ATM+unsp+DNAPK                 | 10157  | AASS      | inlegymndStkyeayvigs    |
| IP100033486 | 288  | 290  | ->unsp                             | ->unsp                               | 11232  | POLG2     | deegrgnklyYnfpowkell    |
| IP100033486 | 288  | 291  | INSR->                             | INSR->                               | 11232  | POLG2     | eegrgnklyYnfpowkell     |
| IP100033487 | 11   | 10   | unsp+PKC->PKC                      | unsp+PKC->ATM+unsp+PKC+DNAPK         | 338917 | VSX2      | -mtgkagealSkpkssetvaks  |
| IP100034308 | 884  | 888  | unsp->                             | unsp->                               | 1757   | SARDH     | vsldvksqdYalermvgtyg    |
| IP100036578 | 1014 | 1009 | ->PKA                              | ->PKA                                | 81792  | ADAMTS12  | srvlkpnkgTisngknpptl    |
| IP100036578 | 1014 | 1011 | PKC->                              | ->PKA                                | 81792  | ADAMTS12  | rvlknpgkTisngknpptl     |
| IP100036578 | 1014 | 1018 | unsp+PKC->                         |                                      | 81792  | ADAMTS12  | gtsingknppTlkipvpptps   |
| IP100043429 | 165  | 170  | PKG+PKA->PKA                       |                                      | 148534 | TMEM56    | ftealkypfSkavimglm      |
| IP100044461 | 183  | 179  | unsp+PKC+cdc2->unsp+cdc2           | unsp+PKC+cdc2->unsp+cdc2             | 79258  | MMEL1     | rtysrcmnaSvieskrasqpl   |
| IP100044666 | 376  | 380  | unsp+PKC+CKII->PKC+CKII            | unsp+PKC+CKII->PKC                   | 130540 | ALS2CR12  | hvgnekmlqTkfateekyk     |
| IP100044761 | 131  | 127  | PKC->                              |                                      | 54517  | PUS7      | tkfvsqhgfSgilkerysdf    |
| IP100044761 | 131  | 134  | unsp->                             | unsp->                               | 54517  | PUS7      | qfsgilkerySdfvvhieigk   |
| IP100044761 | 131  | 135  | PKA->                              | PKA->                                | 54517  | PUS7      | qfsgilkerySdfvvhieigk   |
| IP100045109 | 6    | 2    | PKC->                              |                                      | 221613 | HIST1H2AA | -----mSgrgkqgkkr        |
| IP100045914 | 1050 | 1049 |                                    | unsp+PKC+PKA->unsp+PKC+DNAPK         | 23013  | SPEN      | pvrkeilreSkikldlrint    |
| IP100045946 | 237  | 234  | cdc2->                             | cdc2->                               | 10730  | YME1L1    | rlaetqniapSfvgflldrl    |
| IP100046028 | 100  | 107  | unsp+PKC->unsp+PKC+cdc2            |                                      | 131076 | CDC58     | tlkqrlkeqTlKwmeqseln    |
| IP100059242 | 70   | 75   | unsp+PKA->unsp                     |                                      | 94056  | SYAP1     | asaatkiteSvetaatqtkik   |
| IP100059242 | 191  | 182  | ->cdc2                             |                                      | 94056  | SYAP1     | lvmqlgedlSkmrflavpkl    |
| IP100059279 | 9    | 10   | INSR->                             |                                      | 60412  | EXOC4     | -maaeagagkYrstvskskdp   |
| IP100059279 | 9    | 12   | PKC->                              |                                      | 60412  | EXOC4     | aaeeagagkYrstvskskdp    |
| IP100059292 | 116  | 115  | CKII->CKII+DNAPK                   | CKII->CKII+DNAPK                     | 55110  | MAGOHB    | kigslidvngSkdpeglrvfy   |
| IP100060181 | 233  | 237  | PKC->                              |                                      | 79180  | EFHD2     | qrkaafkelqStfk-----     |
| IP100061009 | 403  | 401  | unsp+PKC->CKII                     |                                      | 93594  | WDR67     | lkqdltdgfeSkiknelpdgl   |
| IP100061206 | 111  | 116  | unsp+PKA->                         | unsp+PKA->                           | 140886 | PABPC5    | gnifkldikSidnalfyfl     |
| IP100061525 | 152  | 154  | PKA->                              | PKA->                                | 64841  | GNPAT1    | iskldnkyTldeqngvdf      |
| IP100062037 | 5    | 2    | PKC->                              |                                      | 140735 | DYNLL2    | -----mSdrkavknad        |
| IP100063130 | 149  | 150  | unsp->SRC+unsp                     |                                      | 374882 | TMEM205   | yrqlrekdpkYsalqrffry    |
| IP100063130 | 149  | 151  | PKG+cdc2->cdc2                     | PKG+cdc2->cdc2                       | 374882 | TMEM205   | rqrlrekdpkYsalqrffry    |
| IP100063635 | 292  | 285  | unsp->unsp+cdc2                    |                                      | 57325  | CSR2BP    | qkeagfldrStstpvkfis     |
| IP100063635 | 292  | 287  | unsp+RSK->unsp                     | unsp+RSK->                           | 57325  | CSR2BP    | eaagfldrstStpvkfisrg    |
| IP100063635 | 292  | 288  |                                    | PKC->unsp+PKC                        | 57325  | CSR2BP    | aagfldrstStpvkfisrg     |
| IP100063635 | 292  | 289  | unsp+cdk5->unsp+cdk5+p38MAPK       |                                      | 57325  | CSR2BP    | agfldrstStpvkfisrg      |
| IP100063635 | 292  | 295  | ->cdc2                             | ->cdc2                               | 57325  | CSR2BP    | ststpvkfISrgppdvlie     |
| IP100063635 | 572  | 570  | unsp+PKG->                         | unsp+PKG->                           | 57325  | CSR2BP    | lsqrgfhrvTklfdyrygs     |
| IP100063903 | 16   | 22   | INSR->                             | INSR->                               | 84833  | USMG5     | ftgikkyfnsYltgmnrcvl    |
| IP100063903 | 17   | 13   | PKC+cdc2->PKC                      |                                      | 84833  | USMG5     | gpesdaqyqTgikkyfnsyt    |
| IP100063903 | 17   | 21   |                                    | PKA->                                | 84833  | USMG5     | qftgikkyfnsYltgmnrcv    |
| IP100063903 | 17   | 22   | INSR->                             | INSR->                               | 84833  | USMG5     | ftgikkyfnsYltgmnrcvl    |
| IP100063903 | 17   | 23   | ->CKI                              |                                      | 84833  | USMG5     | ftgikkyfnsYltgmnrcvl    |
| IP100064162 | 408  | 404  | unsp->unsp+PKA                     |                                      | 80124  | VCPIP1    | dggcvigddrSlqdkyllrv    |
| IP100064202 | 599  | 598  |                                    | ->DNAPK                              | 55534  | MAML3     | kqhnlitgnTlKplthnadl    |
| IP100064212 | 490  | 483  |                                    | ->PKA                                | 283489 | ZNF828    | rggsdpdwksSfiepckpvf    |
| IP100064212 | 617  | 615  | unsp+PKC->                         | unsp+PKC->                           | 283489 | ZNF828    | killeditfSaklikkdnqe    |
| IP100064212 | 617  | 616  |                                    | unsp+PKC->ATM+unsp+PKC+DNAPK         | 283489 | ZNF828    | killeditfSaklikkdnqes   |
| IP100064457 | 928  | 924  | unsp+PKC->unsp                     | unsp+PKC->                           | 84875  | PARP10    | fnrsfcgrnaTvygkyvyar    |
| IP100064765 | 208  | 202  | ->PKA                              | ->PKA                                | 140801 | RPL10L    | pdgcgvkyvpShpldkwrvl    |
| IP100065500 | 283  | 281  | SRC+unsp->SRC                      |                                      | 148362 | C1orf58   | irslqeakfYakaealckey    |
| IP100068506 | 304  | 305  | unsp->                             | unsp->                               | 10061  | ABCF2     | iihnhnkikfYtgyndqyvk    |
| IP100069084 | 2543 | 2540 | PKC->                              | PKC->                                | 8295   | TRRAP     | shdraafamvThvqepere     |
| IP100069750 | 454  | 445  | PKC->PKC+cdc2                      |                                      | 22827  | PufB6     | sequehmsisgSsarrhmvmaql |
| IP100069817 | 416  | 421  | unsp+PKC->PKC                      | unsp+PKC->PKC+cdc2                   | 9031   | BAZ1B     | ilngqkstgnSkppkqldcp    |
| IP100069817 | 426  | 421  | unsp+PKC->PKC                      | unsp+PKC->PKC                        | 9031   | BAZ1B     | ilngqkstgnSkppkqldcp    |
| IP100069817 | 426  | 423  | unsp+cdk5->unsp                    | unsp+cdk5->unsp                      | 9031   | BAZ1B     | ngskstgnsSpkqkltkpt     |
| IP100069817 | 426  | 430  | unsp+PKC->unsp                     | unsp+PKC->unsp+PKC+p38MAPK           | 9031   | BAZ1B     | nsspkqkglTpktrkmqmtl    |
| IP100069817 | 1335 | 1338 | unsp+PKC+PKA->unsp+PKC             | unsp+PKC+PKA->unsp+PKC               | 9031   | BAZ1B     | delvltkrsSrqslelqck     |
| IP100070943 | 930  | 931  | INSR+unsp->INSR                    |                                      | 5297   | P14KA     | hkrirrvadkYlsgldvkfph   |
| IP100070943 | 930  | 933  | PKC+cdc2->cdc2                     |                                      | 5297   | P14KA     | rirrvadkYlsgldvkfphl    |
| IP100072377 | 132  | 126  | unsp+CKI+CKII->unsp+CKII           | unsp+CKI+CKII->unsp+CKII             | 6418   | SET       | alhlytrvTefediksgyr     |
| IP100072377 | 132  | 140  | ->INSR                             | ->INSR                               | 6418   | SET       | diksgyridYfdenpyfenk    |
| IP100072377 | 150  | 146  | SRC+unsp->unsp                     |                                      | 6418   | SET       | ridyfdnYfdenpyfenk      |
| IP100072377 | 172  | 166  | unsp+CKI->unsp                     | unsp+CKI->unsp                       | 6418   | SET       | fhnesgdpSStekskwsgs     |
| IP100072377 | 172  | 169  | PKC->                              |                                      | 6418   | SET       | nesgdpssksTeikwsgkdl    |
| IP100072534 | 70   | 74   | unsp+EGFR->                        |                                      | 55898  | UNC45A    | raachikledYkaeateaska   |
| IP100072534 | 483  | 480  | ->PKA                              | ->PKA                                | 55898  | UNC45A    | rasfitangvSilldlykce    |
| IP100072534 | 483  | 486  | unsp->                             | unsp->                               | 55898  | UNC45A    | angvslldYkceksd Siri    |
| IP100072534 | 487  | 480  |                                    | ->PKA                                | 55898  | UNC45A    | rasfitangvSilldlykce    |
| IP100072534 | 487  | 489  | unsp->unsp+PKC                     |                                      | 55898  | UNC45A    | vsilldlykceSeksdiral    |
| IP100074876 | 843  | 836  | ->cdc2                             |                                      | 51230  | PHF20     | lprveesyTlSehyqkpra     |
| IP100074876 | 843  | 837  |                                    | CKII->                               | 51230  | PHF20     | prveesyTlSehyqkpray     |
| IP100075248 | 22   | 18   | unsp+CKI->unsp+CKI+PKA             |                                      | 808    | CALM3     | eqiaefkeafSlldkdgdgti   |
| IP100075248 | 76   | 71   | PKC->                              | PKC->                                | 808    | CALM3     | ngtidfpellTmmarmkddt    |
| IP100075248 | 76   | 82   | unsp+CKII->unsp+CKI+CKII           |                                      | 808    | CALM3     | mmarmkddtSeeiareavr     |
| IP100075248 | 116  | 118  | unsp+CKII->CKI+CKII                | unsp+CKII->unsp+CKI+CKII             | 808    | CALM3     | hvmtngeklTdeedemire     |
| IP100075248 | 149  | 147  | PKC->                              | PKC->                                | 808    | CALM3     | vnveefvqmmTak-----      |
| IP100081097 | 163  | 165  | ->PKC                              |                                      | 147407 | MCART2    | lqnkhkhdktTntyaqalk     |
| IP100081097 | 163  | 168  | INSR->                             | INSR->                               | 147407 | MCART2    | hkhhdktntYqalkchkg      |
| IP100081836 | 6    | 2    | PKC->                              |                                      | 8336   | HIST1H2AM | -----mSgrgkqgkkr        |
| IP100083708 | 27   | 19   | ->PKA                              |                                      | 23215  | BAT2L2    | tkakdgklyeTlntfykygk    |
| IP100083708 | 27   | 25   | unsp+PKC->                         | unsp+PKC->                           | 23215  | BAT2L2    | kyatlsifnTygkksletqk    |
| IP100083708 | 27   | 30   | unsp+PKA->unsp+CKI                 | unsp+PKA->unsp                       | 23215  | BAT2L2    | lsfntykkgkSletaktvaa    |
| IP100083708 | 49   | 46   | CKI+PKC->PKC+PKA                   | CKI+PKC->PKC+PKA                     | 23215  | BAT2L2    | ltvaarhqlgSlgkvgsrrm    |
| IP100083708 | 49   | 53   | unsp+PKC+cdc2->unsp+cdc2           | unsp+PKC+cdc2->unsp+cdc2             | 23215  | BAT2L2    | glsglkgvlgSrrmpanpnl    |
| IP100083708 | 394  | 392  | INSR->                             | INSR->unsp                           | 23215  | BAT2L2    | paqpsvakvpYgkgspsfngqr  |
| IP100084571 | 126  | 122  |                                    | ->unsp                               | 54148  | MRPL39    | pwdmykpltkSceiklftkd    |
| IP100084571 | 126  | 129  | unsp+PKC->PKC                      |                                      | 54148  | MRPL39    | ltkceiklftkdcdpgvne     |
| IP100084571 | 204  | 203  |                                    | ->DNAPK                              | 54148  | MRPL39    | mpkceiklftkdcdpgvne     |
| IP100084571 | 234  | 233  | unsp->PKA+DNAPK                    | unsp->unsp+DNAPK                     | 54148  | MRPL39    | akvaleifqhSkkydvfeek    |
| IP100084571 | 236  | 233  | unsp->PKA                          |                                      | 54148  | MRPL39    | akvaleifqhSkkydvfeek    |
| IP100093057 | 371  | 376  | unsp->                             | unsp->                               | 1371   | CPOX      | iplvkkhddSftpekwkqq     |
| IP100093057 | 404  | 403  | unsp+CKI->unsp+CKI+PKA             | unsp+CKI->unsp+CKI+DNAPK             | 1371   | CPOX      | vefnilydrgTKglftpgsr    |
| IP100096066 | 291  | 292  | unsp->                             | unsp->                               | 8801   | SUCLG2    | nepieneaakYdlkyglgdn    |
| IP100096066 | 338  | 343  | ->EGFR                             |                                      | 8801   | SUCLG2    | lgggkveaqvYqakiltadp    |
| IP100098902 | 970  | 966  | unsp->                             | unsp->                               | 4967   | OGDH      | cqeehknagYdyvklprtt     |
| IP100098902 | 970  | 975  | PKC+PKG->PKG                       | PKC+PKG->PKG                         | 4967   | OGDH      | yydyvkprttTtirakpwwy    |
| IP100099179 | 303  | 301  | unsp+PKC+PKG+PKA+RSK->unsp+PKA+RSK | unsp+PKC+PKG+PKA+RSK->unsp+PKA+RSK   | 51684  | SUPU      | icigtprttSgkdeqiret     |
| IP100099433 | 440  | 445  | unsp+cdk5+p38MAPK->cdk5+p38MAPK    | unsp+cdk5+p38MAPK->GSK3+cdk5+p38MAPK | 23522  | MYST4     | idgltkftpgSpdgrsrei     |
| IP100099433 | 584  | 578  | unsp+PKC->unsp+PKC                 | unsp+CKI+PKC->unsp+PKC               | 23522  | MYST4     | pkmmrrktelStaksahff     |
| IP100099433 | 584  | 579  | unsp+PKC->PKC                      | unsp+PKC->PKC                        | 23522  | MYST4     | kmmrrktelStaksahffgk    |
| IP100099433 | 584  | 580  | PKC+cdc2->cdc2                     | PKC+cdc2->cdc2                       | 23522  | MYST4     | mmrrktelStaksahffgk     |
| IP100099433 | 584  | 583  | unsp+PKC->                         | unsp+PKC->ATM+unsp+DNAPK             | 23522  | MYST4     | rtkeltelStaksahffgkrdi  |
| IP100099433 | 1038 | 1032 | unsp+cdc2->unsp+PKA+cdc2           | unsp+cdc2->unsp+PKA+cdc2             | 23522  | MYST4     | eqeiltstranSrqsqkvqsq   |
| IP100099433 | 1038 | 1041 | ->PKG+cdc2                         |                                      | 23522  | MYST4     | nsrqsqkvqSknyklyshpes   |
| IP100099433 | 1042 | 1041 |                                    | ->DNAPK                              | 23522  | MYST4     | nsrqsqkvqSknyklyshpes   |
| IP100099463 | 353  | 351  | unsp+PKC->                         | unsp+PKC->                           | 8879   | SGPL1     | vkgytsisadThkyvyapqgs   |

Table S3

|             |      |      |                                                          |                                                                    |        |           |                        |
|-------------|------|------|----------------------------------------------------------|--------------------------------------------------------------------|--------|-----------|------------------------|
| IP100099463 | 353  | 354  | unsp-> SRC                                               | unsp-> SRC                                                         | 8879   | SGP1L     | vtisadthkYgypakgslv    |
| IP100099463 | 353  | 356  | unsp->                                                   | unsp->                                                             | 8879   | SGP1L     | siaadthkyYgypagsslvly  |
| IP100099463 | 353  | 362  | -> PKA                                                   |                                                                    | 8879   | SGP1L     | hygyapqgsSlylvysdkkyr  |
| IP100099834 | 222  | 218  | unsp+PKC+PKG+PKA-> unsp+PKA                              |                                                                    | 29855  | UBN1      | tdykekkSkfSkagftal     |
| IP100099834 | 222  | 221  |                                                          | unsp+PKC+PKA-> unsp+PKC+DNAPK                                      | 29855  | UBN1      | kekkskSkfSkagftalnas   |
| IP100100160 | 971  | 979  | unsp+PKC-> unsp+PKC+cdc2                                 |                                                                    | 55832  | CAND1     | rklylsgsSyrarssvvtav   |
| IP100100460 | 235  | 230  |                                                          | unsp->                                                             | 55157  | DARS2     | pggakefVpSrepkfyslp    |
| IP100100460 | 235  | 238  | PKA-> cdc2                                               | PKA-> cdc2                                                         | 55157  | DARS2     | vpSrepkfVpSpsqqpfkq    |
| IP100100460 | 382  | 378  | unsp+PKC-> unsp                                          | -> EGFR                                                            | 55157  | DARS2     | kalcipagkYrkldesjr     |
| IP100100460 | 382  | 386  | unsp+PKC-> unsp                                          |                                                                    | 55157  | DARS2     | akylrkldeslrfaadfn     |
| IP100100630 | 333  | 336  | PKC->                                                    |                                                                    | 4298   | MLT1      | dkpkakksaTrgekvaese    |
| IP100100656 | 116  | 120  |                                                          | PKC-> PKC+cdc2                                                     | 9524   | TECR      | pfyghkydftSsrhtvvhla   |
| IP100100656 | 116  | 121  | unsp+PKC-> unsp                                          | unsp+PKC-> unsp                                                    | 9524   | TECR      | fyghkydftSsrhtvvhla    |
| IP100100731 | 69   | 65   | unsp-> unsp+PKA                                          |                                                                    | 63898  | SH2D4A    | kprpkengSVhwlkgadke    |
| IP100100980 | 324  | 320  | unsp-> unsp+PKA                                          |                                                                    | 30846  | EHD2      | isylkempSVfgkenkkq     |
| IP100101968 | 176  | 178  | -> PKC                                                   |                                                                    | 28988  | DBNL      | vseirvgkdSfwakaeeke    |
| IP100101968 | 297  | 300  | unsp+DNAPK-> ATM+DNAPK                                   | unsp+DNAPK-> ATM+unsp+DNAPK                                        | 28988  | DBNL      | lspfqlqITapethfrep     |
| IP100102165 | 254  | 251  | PKC->                                                    | PKC->                                                              | 10480  | EIF3M     | lylvsaklaSyvfykyanek   |
| IP100102165 | 6    | 2    | PKC->                                                    |                                                                    | 55766  | H2AF1     | -----mSspagkgkvkr      |
| IP100102339 | 58   | 63   | unsp->                                                   | unsp->                                                             | 4654   | MYO1      | itgalkpeehShPaavhpa    |
| IP100102339 | 102  | 105  | PKC->                                                    |                                                                    | 4654   | MYO1      | lwackackrKTnadrkaat    |
| IP100102339 | 102  | 106  | unsp+PKG-> PKG                                           |                                                                    | 4654   | MYO1      | wackackrKTnadrkaatm    |
| IP100102339 | 104  | 105  |                                                          | PKC-> unsp+PKC                                                     | 4654   | MYO1      | lwackackrKTnadrkaat    |
| IP100102580 | 229  | 232  | EGFR->                                                   |                                                                    | 66036  | MTMR9     | natrdragrgYlidslnva    |
| IP100102580 | 229  | 236  | -> cdc2                                                  |                                                                    | 66036  | MTMR9     | ragrgyidTrlnsvaqtr     |
| IP100102580 | 229  | 238  | PKC-> PKC+cdc2                                           | PKC-> PKC+cdc2                                                     | 66036  | MTMR9     | kgrgyidTrlnsvaqtr      |
| IP100102752 | 450  | 448  | INSR-> EGFR                                              |                                                                    | 64783  | RBM15     | itnmpkigYrkcaptr       |
| IP100102752 | 450  | 452  | p38MAPK-> cdk5+p38MAPK                                   | p38MAPK-> unsp+cdk5+p38MAPK                                        | 64783  | RBM15     | npkisygaTatrtwvogl     |
| IP100102752 | 450  | 454  | unsp+PKC-> PKC                                           |                                                                    | 64783  | RBM15     | ikgygkatpTrlrvvgglp    |
| IP100102815 | 23   | 20   | unsp+cdc2+PKA-> PKA                                      | unsp+cdc2+PKA-> unsp+PKA                                           | 64318  | NO3CL     | ipsfrkltSkvklennkl     |
| IP100102815 | 34   | 37   | PKC->                                                    |                                                                    | 64318  | NO3CL     | klknkqfkqgSttkyrkeqr   |
| IP100102815 | 34   | 38   | unsp+PKC-> PKC                                           |                                                                    | 64318  | NO3CL     | klknkqfkqgSttkyrkeqr   |
| IP100102815 | 40   | 37   | PKC->                                                    | PKC->                                                              | 64318  | NO3CL     | klknkqfkqgSttkyrkeqr   |
| IP100102815 | 40   | 38   | unsp+PKC-> PKC                                           | unsp+PKC->                                                         | 64318  | NO3CL     | klknkqfkqgSttkyrkeqr   |
| IP100103023 | 298  | 295  | PKC-> CKII                                               |                                                                    | 26190  | FBXW2     | lhnpgdylISadkyekiw     |
| IP100103023 | 519  | 518  | unsp+PK+cdc2-> unsp+PKA+cdc2                             | unsp+PKG+cdc2-> ATM+unsp                                           | 25920  | COBRA1    | lilhvrpavSkakale       |
| IP100104050 | 221  | 217  | unsp-> unsp+RSK                                          | unsp-> unsp+RSK                                                    | 9967   | THRAP3    | sgtsdqtkSesskwppdat    |
| IP100104050 | 221  | 219  | unsp+PKC-> unsp+CKII+cdc2                                | unsp+PKC-> unsp+CKI+cdc2                                           | 9967   | THRAP3    | tsqdtkaseSkwpdpdytg    |
| IP100104050 | 221  | 220  | unsp+CKI-> unsp+CKI+PKA+DNAPK                            | unsp+CKI-> ATM+unsp+CKI+DNAPK                                      | 9967   | THRAP3    | tsqdtkaseSkwpdpdytg    |
| IP100104050 | 221  | 227  | -> cdc2                                                  | -> cdc2                                                            | 9967   | THRAP3    | sesskwppdaTygtgsasr    |
| IP100104050 | 401  | 392  | PKC-> PKC+cdc2                                           |                                                                    | 9967   | THRAP3    | glgdgmksdSfapktsekp    |
| IP100104050 | 401  | 399  | unsp+PKC->                                               | unsp+PKC->                                                         | 9967   | THRAP3    | kdsfapktSekfrgssqp     |
| IP100104050 | 401  | 406  | ATM+unsp+PKC+cdc2+PKA+DNAPK-> ATM+unsp+cdc2+DNAPK        | ATM+unsp+PKC+cdc2+PKA+DNAPK-> ATM+unsp+PKG pro PHOspoELM PhosphoSI | 9967   | THRAP3    | ktdeekprfgSsqpryldr    |
| IP100104050 | 455  | 454  | -> PKA                                                   | -> DNAPK                                                           | 9967   | THRAP3    | sfedepkfmSkvgnankqe    |
| IP100104050 | 519  | 524  | unsp+PKC-> unsp                                          | unsp+PKC-> unsp                                                    | 9967   | THRAP3    | zfpshfrfyTaycagqks     |
| IP100104050 | 709  | 704  | SRC+unsp-> cdc2                                          | unsp+CKI-> cdc2                                                    | 9967   | THRAP3    | metemrepYkaegkyddp     |
| IP100104050 | 811  | 805  | unsp+CKI+cdc2-> unsp+CKI+PKA+cdc2                        | unsp+CKI+cdc2-> unsp+CKI+PKA+cdc2                                  | 9967   | THRAP3    | yteetereestTgdfksrgl   |
| IP100104050 | 811  | 807  |                                                          | unsp+CKII-> CKII                                                   | 9967   | THRAP3    | eteetereestTgdfksrgl   |
| IP100104907 | 113  | 110  | unsp+GSK3+cdk5-> GSK3                                    | unsp+GSK3+cdk5-> unsp+GSK3                                         | 55320  | C14orf106 | dglknkanyeSpkgifmrkme  |
| IP100105407 | 95   | 96   | unsp-> unsp+PKC                                          | unsp-> unsp+PKC                                                    | 57016  | AKR1B10   | rplvrkafekTlklldisyl   |
| IP100105407 | 95   | 103  | unsp+PKA-> unsp                                          |                                                                    | 57016  | AKR1B10   | fektikldiSyldvlyihvp   |
| IP100105407 | 98   | 96   | unsp-> cdc2                                              | unsp->                                                             | 57016  | AKR1B10   | rplvrkafekTlklldisyl   |
| IP100105407 | 98   | 103  | unsp+PKA-> unsp                                          | unsp+PKA-> unsp+PKG                                                | 57016  | AKR1B10   | fektikldiSyldvlyihvp   |
| IP100105407 | 179  | 178  | unsp->                                                   | unsp->                                                             | 57016  | AKR1B10   | ekllnkqgkYkYkpyrvech   |
| IP100105407 | 263  | 266  | p38MAPK->                                                |                                                                    | 57016  | AKR1B10   | rmvivpksVPariveniaq    |
| IP100105598 | 418  | 414  | unsp-> unsp+PKA                                          | unsp-> unsp+PKA                                                    | 5717   | PSMD11    | tnimskvvdSYlnkakklt-   |
| IP100105598 | 418  | 416  | EGFR->                                                   |                                                                    | 5717   | PSMD11    | qnmskvvdSYlnkakklt---  |
| IP100105598 | 418  | 423  | PKA->                                                    |                                                                    | 5717   | PSMD11    | dslynkakkIT-----       |
| IP100106567 | 46   | 42   | PKC->                                                    | PKC->                                                              | 55339  | WDR33     | faqqqamqlTfdgkrmkav    |
| IP100107722 | 114  | 106  | unsp-> unsp+PKA                                          | unsp-> unsp+PKA                                                    | 84693  | MCEE      | melhlplgrdSpiaglfmrk   |
| IP100107745 | 78   | 73   | unsp+PKC->                                               | unsp+PKC-> PKC                                                     | 51747  | LUC7L3    | denlrkqviedSsrfrmkyver |
| IP100107745 | 78   | 74   | -> PKA                                                   | -> unsp                                                            | 51747  | LUC7L3    | denlrkqviedSsrfrmkyver |
| IP100107745 | 78   | 81   | INSR->                                                   | INSR->                                                             | 51747  | LUC7L3    | ekssrfrmkvYelrlrylqs   |
| IP100107745 | 166  | 174  | unsp-> unsp+cdc2                                         |                                                                    | 51747  | LUC7L3    | qlkeerellSTsttsiefaa   |
| IP100107745 | 231  | 226  | PKC->                                                    | PKC->                                                              | 51747  | LUC7L3    | qhmgyakikaTweelkeklrk  |
| IP100107745 | 231  | 238  | unsp+PKG-> unsp+PKG+PKA                                  |                                                                    | 51747  | LUC7L3    | eelkeklrkrTeepdrderlk  |
| IP100140420 | 641  | 638  | unsp+PKC+PKA+DNAPK-> unsp+PKA+DNAPK                      | unsp+PKC+PKA+DNAPK-> unsp+PKA+DNAPK                                | 27044  | SDN1      | skvhftaersSPakihvfyid  |
| IP100140420 | 752  | 755  | unsp+p38MAPK-> GSK3                                      | unsp+p38MAPK-> p38MAPK                                             | 27044  | SDN1      | wyrraveksSpakihvfyid   |
| IP100143753 | 98   | 95   | PKC->                                                    |                                                                    | 23350  | SR140     | sigmstakrTliskeeeqel   |
| IP100143753 | 98   | 97   | unsp+PKC+PKG+RSK-> unsp+PKC+PKA+RSK                      | unsp+PKC+PKG+RSK-> ATM+unsp+PKC+DNAPK+RSK                          | 23350  | SR140     | gkmstaktortSkkeeeqelk  |
| IP100143753 | 105  | 97   | unsp+PKC+PKG+RSK-> unsp+PKC+PKG+PKA+RSK                  |                                                                    | 23350  | SR140     | gkmstaktortSkkeeeqelk  |
| IP100146935 | 763  | 759  | unsp+CKII-> unsp                                         | unsp+CKII-> unsp+CKII+DNAPK                                        | 23350  | SR140     | knspfrkvpSkweavdesel   |
| IP100146935 | 283  | 282  | unsp-> unsp+PKA+DNAPK                                    | unsp-> unsp+DNAPK                                                  | 10059  | DMN1L     | spyslannngTYklartlnrl  |
| IP100147874 | 79   | 76   | unsp+PKC-> unsp+PKA                                      | unsp+PKC-> unsp+PKA                                                | 54187  | NANS      | aleryptskhSwgktygehrk  |
| IP100147874 | 79   | 80   |                                                          | PKC-> unsp+PKC                                                     | 54187  | NANS      | pytskshwgkTYgehrklref  |
| IP100147874 | 79   | 81   |                                                          | -> EGFR                                                            | 54187  | NANS      | ytshkshwgkTYgehrklref  |
| IP100147874 | 290  | 294  | unsp+PKC->                                               |                                                                    | 54187  | NANS      | emacneklgkSVvakvkipeg  |
| IP100147874 | 293  | 294  | unsp+PKC-> PKC                                           | unsp+PKC-> PKC                                                     | 54187  | NANS      | emacneklgkSVvakvkipeg  |
| IP100149276 | 270  | 268  | EGFR->                                                   |                                                                    | 9577   | BRE       | tnkvqyvigYHkrreyiaaf   |
| IP100149276 | 270  | 274  |                                                          | -> EGFR                                                            | 9577   | BRE       | tnkvqyikrreYlaaftsiftg |
| IP100149849 | 447  | 444  | PKC->                                                    | PKC->                                                              | 25839  | COG4      | etvknavalTYekqgtstsm   |
| IP100149849 | 447  | 445  | INSR+unsp->                                              | INSR+unsp-> unsp                                                   | 25839  | COG4      | tnknavalidTYekqgtstsm  |
| IP100149849 | 447  | 451  | unsp->                                                   | unsp->                                                             | 25839  | COG4      | aldtyekqgtTssmvdvfyid  |
| IP100150269 | 27   | 34   | CKII+DNAPK-> cdc2+CKII+DNAPK                             |                                                                    | 9128   | PRPF4     | vrkkiphiyvgSleekereria |
| IP100152216 | 202  | 195  | unsp-> unsp+cdc2                                         |                                                                    | 79608  | RIC3      | krllhlreiTrvmkegklfid  |
| IP100152535 | 100  | 91   | unsp-> unsp+cdc2                                         |                                                                    | 26038  | CHD5      | dleeksesegSDyspnkkkkk  |
| IP100152535 | 100  | 94   | unsp+CKI+cdk5+p38MAPK-> unsp+cdk5+p38MAPK                | unsp+CKI+cdk5+p38MAPK-> unsp+cdk5+p38MAPK                          | 26038  | CHD5      | eeksesegSDyspnkkkkkk   |
| IP100152535 | 858  | 857  | -> PKA                                                   | -> DNAPK                                                           | 26038  | CHD5      | deahlrknngSKfrrvnsyk   |
| IP100152535 | 858  | 865  | unsp+PKC-> unsp+PKC+cdc2                                 | unsp+PKC-> unsp+PKC+cdc2                                           | 26038  | CHD5      | seemYkldiSKfkgfaykrl   |
| IP100152653 | 322  | 321  | PKC->                                                    | PKC-> ATM                                                          | 1767   | DNAH5     | aviaplakSKlktwremd     |
| IP100152653 | 322  | 326  | unsp+PKC->                                               | unsp+PKC-> PKC                                                     | 1767   | DNAH5     | laaaksklktTwremdirt    |
| IP100152688 | 419  | 414  |                                                          | unsp->                                                             | 221078 | NSU6      | ggegmgklllSCeqklqlarf  |
| IP100152692 | 65   | 64   | -> PKA                                                   | -> DNAPK                                                           | 92675  | DTD1      | vfeedesghwSKsvmdkqyei  |
| IP100152692 | 65   | 66   | unsp+PKC-> unsp+PKC+cdc2                                 | unsp+PKC-> unsp+PKC+cdc2                                           | 92675  | DTD1      | edesghkhwSKsvmdkqyei   |
| IP100152695 | 98   | 93   | unsp+PKC-> unsp+PKA                                      | unsp+PKC-> unsp+PKC+PKA                                            | 80335  | WDR82     | nkidditrylSHdnkryfir   |
| IP100152695 | 98   | 99   | INSR+unsp+EGFR-> EGFR                                    | INSR+unsp+EGFR-> INSR+EGFR                                         | 80335  | WDR82     | irylSHdnkYrYrYpghnkr   |
| IP100152695 | 98   | 102  |                                                          | -> INSR                                                            | 80335  | WDR82     | lSHdnkYrYrYpghnkrvra   |
| IP100152695 | 181  | 178  | PKC->                                                    | PKC->                                                              | 80335  | WDR82     | seemYkldiSKfkgfaykrl   |
| IP100152695 | 181  | 186  |                                                          | PKC->                                                              | 80335  | WDR82     | lrsdkgprfTlrmeydrctce  |
| IP100152785 | 12   | 7    | unsp->                                                   | unsp->                                                             | 8348   | HIST1H2B  | ----mpdpakSapapkgskk   |
| IP100152785 | 12   | 15   | unsp+PKC-> PKC                                           | unsp+PKC-> PKC                                                     | 8348   | HIST1H2B  | aksapapkggSKkavtkaqkk  |
| IP100152785 | 13   | 15   | unsp+PKC-> PKC                                           |                                                                    | 8348   | HIST1H2B  | aksapapkggSKkavtkaqkk  |
| IP100152785 | 16   | 15   | unsp+PKC-> unsp+PKC+PKA                                  | unsp+PKC-> ATM+unsp+PKC+DNAPK                                      | 8348   | HIST1H2B  | aksapapkggSKkavtkaqkk  |
| IP100152785 | 17   | 15   | unsp+PKC-> PKC+PKA                                       | unsp+PKC-> PKC+PKA                                                 | 8348   | HIST1H2B  | aksapapkggSKkavtkaqkk  |
| IP100152785 | 21   | 15   | unsp+PKC-> unsp+PKC+PKA                                  | unsp+PKC-> unsp+PKC+PKA                                            | 8348   | HIST1H2B  | aksapapkggSKkavtkaqkk  |
| IP100152785 | 21   | 20   |                                                          | PKC-> PKC+DNAPK                                                    | 8348   | HIST1H2B  | apkggkavTKaqqkdgdkr    |
| IP100152785 | 109  | 113  | unsp->                                                   |                                                                    | 8348   | HIST1H2B  | lpgelakhavSegtkavtkyt  |
| IP100152906 | 6    | 5    |                                                          | -> DNAPK                                                           | 3017   | HIST1H2B  | -----mpgTksapapkgks    |
| IP100152906 | 12   | 15   | unsp+PKC-> PKC                                           | unsp+PKC-> PKC                                                     | 3017   | HIST1H2B  | tksapapkggSKkavtkaqkk  |
| IP100152906 | 13   | 15   | unsp+PKC-> PKC                                           |                                                                    | 3017   | HIST1H2B  | tksapapkggSKkavtkaqkk  |
| IP100152906 | 16   | 15   | unsp+PKC-> unsp+PKC+PKA                                  | unsp+PKC-> ATM+unsp+PKC+DNAPK                                      | 3017   | HIST1H2B  | tksapapkggSKkavtkaqkk  |
| IP100152906 | 21   | 15   | unsp+PKC-> unsp+PKC+PKA                                  | unsp+PKC-> unsp+PKC+PKA                                            | 3017   | HIST1H2B  | tksapapkggSKkavtkaqkk  |
| IP100152906 | 21   | 20   |                                                          | PKC-> PKC+DNAPK                                                    | 3017   | HIST1H2B  | apkggkavTKaqqkdgdkr    |
| IP100152906 | 109  | 113  | unsp->                                                   |                                                                    | 3017   | HIST1H2B  | lpgelakhavSegtkavtkyt  |
| IP100152906 | 117  | 116  |                                                          | unsp+PKC-> unsp+PKC+DNAPK                                          | 3017   | HIST1H2B  | elakhavSegtkavtkytssk  |
| IP100152906 | 121  | 120  |                                                          | -> ATM+DNAPK                                                       | 3017   | HIST1H2B  | havSegtkavTKaqqkdgdkr  |
| IP100152906 | 121  | 123  | PKC->                                                    | PKC->                                                              | 3017   | HIST1H2B  | SegtkavtkytTssk-----   |
| IP100152981 | 608  | 602  |                                                          | PKA-> ATM+PKA                                                      | 28976  | ACAD9     | enideqikvSqglekrary    |
| IP100152981 | 608  | 611  | unsp+EGFR-> EGFR                                         | unsp+EGFR-> EGFR                                                   | 28976  | ACAD9     | vsqglekraYcaphldrct    |
| IP100154451 | 517  | 520  | unsp+cdc2+DNAPK-> cdc2+DNAPK                             | unsp+cdc2+DNAPK-> cdc2+DNAPK                                       | 64210  | MMS19     | lyrlsfikedSgscrvaalea  |
| IP100154451 | 517  | 522  | unsp->                                                   | unsp->                                                             | 64210  | MMS19     | lrsfikedsgScrvaaleasg  |
| IP100155601 | 103  | 100  | cdc2->                                                   | cdc2->                                                             | 28992  | MACROD1   | ststdwkeakSflkgsldkrq  |
| IP100155649 | 477  | 480  |                                                          | -> PKC                                                             | 79930  | DOK3      | paagfakvlTlsrerkrpp    |
| IP100155649 | 477  | 483  | unsp+PKC-> unsp+CKI+PKC                                  |                                                                    | 79930  | DOK3      | gfkakvlTlsrerkrppapc   |
| IP100155649 | 1259 | 1259 | unsp+PKC+PKA+PKB+PKA+RSK-> unsp+PKC+PKG+PKB+cdc2+PKA+RSK | unsp+GSK3+p38MAPK-> p38MAPK                                        | 6942   | TCF20     | npilrmrVsfSipsgsqrdq   |
| IP100159322 | 1267 | 1262 | unsp+GSK3+p38MAPK-> p38MAPK                              | unsp+GSK3+p38MAPK-> p38MAPK                                        | 6942   | TCF20     | rvfssipSPksgsqrdq      |
| IP100159322 | 1267 | 1266 |                                                          | unsp+PKC-> unsp+PKC+DNAPK                                          | 6942   | TCF20     | rvfssipSPksgsqrdq      |
| IP100159322 | 1267 | 1270 | ATM+unsp+PKC+DNAPK-> ATM+DNAPK                           | ATM+unsp+PKC+DNAPK-> ATM+PKC+DNAPK                                 | 6942   | TCF20     | vispskrgSDyspnkkkk     |

Table S3

|             |      |      |                                           |                                                |        |           |                         |
|-------------|------|------|-------------------------------------------|------------------------------------------------|--------|-----------|-------------------------|
| IP100162563 | 20   | 15   | PKC+cdc2->                                | PKC+cdc2->cdc2                                 | 9810   | RNF40     | gnkraagdgGgSgpppeklisre |
| IP100162562 | 20   | 23   | unsp->unsp+CKII                           | unsp->unsp+CKII                                | 9810   | RNF40     | gsgpppeklisSreetttttii  |
| IP100163496 | 801  | 805  | PKC->                                     | PKC->                                          | 8500   | PPIA1     | hkapkkkgikSsigrfgkike   |
| IP100163496 | 801  | 806  | unsp+PKA->                                | unsp+PKA->PKA                                  | 8500   | PPIA1     | kapkkkgiksSigrfgkkek    |
| IP100163496 | 804  | 806  | unsp+PKA->PKC                             | unsp+PKA->unsp                                 | 8500   | PPIA1     | kapkkkgiksSigrfgkkek    |
| IP100163505 | 103  | 100  | PKC->                                     | PKC->                                          | 9584   | RBM39     | rfcrvryrsySgpfksaisag   |
| IP100163505 | 103  | 106  | unsp+cdc2->cdc2                           | unsp+cdc2->cdc2                                | 9584   | RBM39     | rspysgpfnsSaigrkiglp    |
| IP100164352 | 1117 | 1112 |                                           | ATM+DNAPK->DNAPK                               | 23036  | ZNF292    | vegctrtynsSqsigkhmkt    |
| IP100164352 | 1117 | 1114 | unsp+CKI+PKC->                            |                                                | 23036  | ZNF292    | gctrtynsqSigkhmktahp    |
| IP100164352 | 1117 | 1121 |                                           | PKG->                                          | 23036  | ZNF292    | ssqsigkhmkTahpdqyaafk   |
| IP100166055 | 21   | 19   | ATM+PKC+DNAPK->ATM+DNAPK                  | ATM+PKC+DNAPK->ATM+DNAPK                       | 401466 | C8orf59   | pksmrhiaSqknfnakna      |
| IP100166153 | 108  | 110  | ATM+unsp->ATM                             | ATM+unsp->ATM+unsp+DNAPK                       | 23070  | FTSDJ2    | fregeglgkySagrkdivaes   |
| IP100166293 | 6    | 5    | ->DNAPK                                   | ->ATM+DNAPK                                    | 128312 | HIST3H2BB | -----mpdpSksapapkgS     |
| IP100166293 | 6    | 7    | unsp->                                    | unsp->                                         | 128312 | HIST3H2BB | -----mpdpSksapapkgS     |
| IP100166293 | 12   | 7    | unsp->                                    | unsp->                                         | 128312 | HIST3H2BB | -----mpdpSksapapkgS     |
| IP100166293 | 12   | 15   | unsp+PKC->PKC                             | unsp+PKC->PKC                                  | 128312 | HIST3H2BB | sksapapkgSskavtkaaqk    |
| IP100166293 | 13   | 15   | unsp+PKC->PKC                             |                                                | 128312 | HIST3H2BB | sksapapkgSskavtkaaqk    |
| IP100166395 | 439  | 445  | ->PKA                                     |                                                | 197322 | ACSF3     | eywnkpeetSaftldgwfkt    |
| IP100166500 | 114  | 112  | INSR->                                    |                                                | 51588  | PIA5A     | agpnidyprlvYgkynglgrl   |
| IP100166528 | 582  | 584  | PKG+cdc2+PKA->PKG+cdc2                    | PKG+cdc2+PKA->cdc2                             | 253260 | RICTOR    | vrillyfkykSsklyanldd    |
| IP100166528 | 582  | 585  | PKC->                                     | PKC->                                          | 253260 | RICTOR    | rrillyfkykSsklyanldd    |
| IP100166555 | 511  | 507  | unsp+PKC->unsp                            | unsp+PKC->PKC+PKG                              | 64062  | RBM26     | sgeepvptkTlwfddpnfrnt   |
| IP100166749 | 291  | 305  | unsp+RSK->unsp+PKA+RSK                    | unsp+RSK->unsp+PKA+RSK                         | 23203  | PMP2A     | gspkldierdmSvnsygtptip  |
| IP100167196 | 54   | 57   | unsp+CKII->cdc2+CKII                      | unsp+CKII->cdc2+CKII                           | 164153 | UBL4A     | galledkhnISdydcignasp   |
| IP100167535 | 346  | 342  | PKC->                                     |                                                | 57634  | EP400     | sslsvsognTgmkvvpkkle    |
| IP100167535 | 1634 | 1633 | cdc2->ATM+cdc2+DNAPK                      |                                                | 57634  | EP400     | etpvtlfgqSktflshsrq     |
| IP100167535 | 1634 | 1636 | PKC+cdc2->PKC                             | PKC+cdc2->cdc2                                 | 57634  | EP400     | vtlfgqSktflshsrqrlqt    |
| IP100167535 | 2356 | 2358 | PKG->                                     | PKG->                                          | 57634  | EP400     | akplptfakpTaepgqdnepw   |
| IP100167904 | 103  | 102  |                                           | ->ATM                                          | 160762 | CDC63     | nymelrllqTkedyealikis   |
| IP100167904 | 103  | 106  | INSR+unsp->                               | ->cdc2                                         | 160762 | CDC63     | lrlrlqtedYealikisvl     |
| IP100167904 | 111  | 102  | ->cdc2                                    |                                                | 160762 | CDC63     | nymelrllqTkedyealikis   |
| IP100167941 | 1683 | 1679 | unsp+PKC->unsp+PKA                        |                                                | 23195  | MDN1      | ikrtakivrtTeygknelkyr   |
| IP100167941 | 1683 | 1681 | EGFR->                                    | EGFR->unsp+EGFR                                | 23195  | MDN1      | rlakivrtTeygknelkyr     |
| IP100168603 | 496  | 490  |                                           | unsp->unsp+GSK3                                | 55349  | CHDH      | prfgkelqpgSshiqsdeida   |
| IP100168603 | 496  | 494  | unsp+CKII->unsp+cdc2+CKII                 |                                                | 55349  | CHDH      | kelqpgshiqSskeidafrva   |
| IP100168839 | 153  | 156  | unsp+PKC+PKA->PKG+PKA                     | unsp+PKC+PKA->PKG+PKA                          | 144106 | FAM10A5   | rlailyakraSvfkqlqpna    |
| IP100168899 | 135  | 133  | unsp+PKC+PKA->unsp+PKG+PKA                | unsp+PKC+PKA->unsp+PKG+PKA                     | 80174  | DBF4B     | vdpgkshprPKrkipdvslps   |
| IP100168899 | 135  | 139  | unsp->                                    |                                                | 80174  | DBF4B     | hprsrpkpvdSvplrskell    |
| IP100169383 | 11   | 2    | CKI+PKA+DNAPK->CKI+cdc2+PKA+DNAPK         |                                                | 5230   | PGK1      | -----mSlnskltdkdi       |
| IP100169383 | 11   | 8    | ->PKA                                     |                                                | 5230   | PGK1      | -----mSlnskltdkdi       |
| IP100169383 | 75   | 76   | unsp->                                    | unsp->                                         | 5230   | PGK1      | pdgvpmpdkYslapvavell    |
| IP100169383 | 75   | 77   | PKA->                                     | PKA->                                          | 5230   | PGK1      | pdgvpmpdkYSlepavvelks   |
| IP100169383 | 86   | 87   | cdc2->CKI+cdc2                            |                                                | 5230   | PGK1      | slapvavellSllgkdvlfik   |
| IP100169383 | 156  | 153  | unsp+PKA+RSK+DNAPK->PKA+DNAPK             | unsp+PKA+RSK+DNAPK->unsp+PKA+DNAPK             | 5230   | PGK1      | ekpieafraSlskldgvyvyn   |
| IP100169383 | 156  | 155  |                                           | ->ATM+DNAPK                                    | 5230   | PGK1      | akieafraSlskldgvyvnda   |
| IP100169383 | 199  | 196  | unsp->                                    | unsp->                                         | 5230   | PGK1      | ggflmkelnYfakalesper    |
| IP100169383 | 267  | 271  | PKC+CKII->CKII                            |                                                | 5230   | PGK1      | egakivkdmsSkaeengvkit   |
| IP100169383 | 291  | 288  | ->CKII                                    | ->CKII                                         | 5230   | PGK1      | vkltipvdvTadklddenakt   |
| IP100169383 | 322  | 320  | unsp+PKC+CKII->CKII                       | unsp+PKC+CKII->CKII                            | 5230   | PGK1      | gwmldcpgesSskyyaeavtr   |
| IP100169383 | 322  | 321  | unsp+PKC+cdc2->cdc2                       | unsp+PKC+cdc2->cdc2                            | 5230   | PGK1      | gwmldcpgesSskyyaeavtr   |
| IP100169383 | 323  | 320  | unsp+PKC+CKII->unsp+CKII                  | unsp+PKC+cdc2->cdc2                            | 5230   | PGK1      | gwmldcpgesSskyyaeavtr   |
| IP100169383 | 323  | 321  | unsp+PKC+cdc2->cdc2                       | unsp+PKC+cdc2->cdc2                            | 5230   | PGK1      | wmldcpgesSskyyaeavtr    |
| IP100170596 | 723  | 724  | unsp->                                    | unsp->                                         | 25942  | SIN3A     | nkvwreqnekYlksldhqqi    |
| IP100170596 | 723  | 728  | PKC->                                     | PKC->                                          | 25942  | SIN3A     | reqnekyykSldhghinfkq    |
| IP100170596 | 727  | 724  | unsp->                                    | unsp->                                         | 25942  | SIN3A     | nkvwreqnekYlksldhqqi    |
| IP100170596 | 727  | 725  | unsp->                                    |                                                | 25942  | SIN3A     | kwvreqnekYlksldhqqin    |
| IP100170596 | 727  | 728  | PKC->PKG+PKA                              | PKC->PKG+PKA                                   | 25942  | SIN3A     | reqnekyykSldhghinfkq    |
| IP100170596 | 934  | 938  | unsp+PKC+cdc2+PKA+RSK->unsp+PKG+cdc2+PKA  |                                                | 25942  | SIN3A     | reqnekyykSldhghinfkq    |
| IP100170596 | 934  | 940  | unsp+p38MAPK->unsp                        |                                                | 25942  | SIN3A     | vgikrdsdSpaigrlkeap     |
| IP100170786 | 13   | 6    |                                           | unsp+PKC+PKA+RSK->unsp+PKC+PKA                 | 51729  | WBP11     | -----mgnrsTsstsgkfmmn   |
| IP100170786 | 13   | 9    | CKI+PKC->CKI                              |                                                | 51729  | WBP11     | -----mgnrsTsstsgkfmmn   |
| IP100170786 | 13   | 11   | unsp+PKC->                                | unsp+PKC->                                     | 51729  | WBP11     | mgnrsTsstsgkfmmnptdq    |
| IP100170786 | 13   | 18   | PKC->                                     | PKC->                                          | 51729  | WBP11     | stksqkfmmnpTdqarkeark   |
| IP100170867 | 512  | 515  | unsp+cdc2+PKA->unsp+cdc2                  | unsp+cdc2+PKA->unsp+cdc2                       | 1616   | DAXX      | eknlpepqkISrsseqeqnqk   |
| IP100171127 | 126  | 124  | unsp+PKC+CKII->unsp+CKII                  | unsp+PKC+CKII->unsp+CKII                       | 55833  | UBAP2     | senkennekSekessrggrn    |
| IP100171127 | 126  | 129  | unsp+unsp+cdc2                            | unsp+unsp+cdc2                                 | 55833  | UBAP2     | senkennekSrggrnnrnqg    |
| IP100171390 | 23   | 19   | unsp->                                    | unsp->unsp+cdc2                                | 84950  | PRPF38A   | zshihngpqlvYekivrti     |
| IP100171390 | 23   | 27   | PKC->                                     |                                                | 84950  | PRPF38A   | pqylveklirTnyeskywke    |
| IP100171611 | 10   | 12   | unsp+PKC+PKG->PKC                         | unsp+PKC+PKG->unsp+PKC                         | 653604 | HIST2H3D  | artqtarksTgkaprkqla     |
| IP100171611 | 15   | 11   |                                           | unsp->unsp+PKG                                 | 653604 | HIST2H3D  | martqtarksTgkaprkqla    |
| IP100171611 | 15   | 12   | unsp+PKC+PKG->PKG+PKA                     | unsp+PKC+PKG->PKG+PKA                          | 653604 | HIST2H3D  | artqtarksTgkaprkqla     |
| IP100171611 | 24   | 23   |                                           | PKC->PKC+DNAPK                                 | 653604 | HIST2H3D  | gkqkaprkqlaTkaarksapat  |
| IP100171611 | 24   | 29   | unsp+PKG+PKA->unsp+PKA                    |                                                | 653604 | HIST2H3D  | qklatkaarkSapatgvgkvp   |
| IP100171611 | 57   | 58   | unsp->                                    | unsp->                                         | 653604 | HIST2H3D  | alreirryqSTellirklpf    |
| IP100171611 | 80   | 88   | ->cdc2                                    |                                                | 653604 | HIST2H3D  | dikdrirgSsSavmlagease   |
| IP100171692 | 87   | 84   | ->PKA                                     |                                                | 83451  | ABHD11    | gflgsktrfnSskilaagctg   |
| IP100171779 | 260  | 258  | PKC->                                     | PKC->                                          | 64431  | ACTR6     | fcckpreemvISgkyksgeqil  |
| IP100171779 | 262  | 258  | PKC->unsp+PKC                             | PKC->unsp+PKC                                  | 64431  | ACTR6     | fcckpreemvISgkyksgeqil  |
| IP100171903 | 239  | 243  | unsp+PKA->PKA                             | unsp+PKA->unsp                                 | 4670   | HNRNPM    | adiledkdgkSrgigtvtfeq   |
| IP100172487 | 101  | 104  | unsp+PKA->unsp                            | unsp+PKA->unsp+PKC+CKII                        | 23519  | ANP32D    | nlsngnkidlStieplklen    |
| IP100174775 | 142  | 145  | unsp+PKC->unsp                            |                                                | 319101 | KRT73     | qikvlnnfSaSfdkvrflaq    |
| IP100175151 | 53   | 60   | INSR->                                    | INSR->                                         | 54790  | TET2      | gdtkwshfskYygipcmkgsq   |
| IP100175151 | 53   | 61   | unsp+EGFR->INSR+unsp+EGFR                 | unsp+EGFR->INSR+unsp+EGFR                      | 54790  | TET2      | dktwshfskYygipcmkgsq    |
| IP100176157 | 538  | 535  | PKC->                                     | PKC->                                          | 134359 | C5orf37   | pvtvtpipaTaakvyrtdip    |
| IP100176706 | 21   | 16   | CKI+PKC->CKI                              |                                                | 84991  | RBM17     | dlgvtssdkTegwsknflqsl   |
| IP100176706 | 21   | 20   |                                           | ->DNAPK                                        | 84991  | RBM17     | etdsdktegwsKnfklqslq    |
| IP100176903 | 109  | 102  | unsp->unsp+cdc2                           |                                                | 284119 | PTFR      | elsklgkahaTtsntvsklle   |
| IP100176903 | 109  | 106  | PKC->                                     | PKC->                                          | 284119 | PTFR      | lgkahattsnTvskllekrvk   |
| IP100176903 | 109  | 108  | PKC->                                     | ->ATM+DNAPK                                    | 284119 | PTFR      | kahattsnTvskllekrvk     |
| IP100177728 | 9    | 5    | PKC->                                     | PKC->                                          | 55748  | CNDP2     | -----maalTlftyidenq     |
| IP100177728 | 9    | 6    | PKC->                                     |                                                | 55748  | CNDP2     | -----maalTlftyidenq     |
| IP100177728 | 9    | 9    | unsp->                                    | unsp->                                         | 55748  | CNDP2     | -maalTlftyidenqndryk    |
| IP100177888 | 363  | 369  | unsp+PKC+PKG+PKB+PKA+RSK->PKG+PKB+PKA+RSK | unsp+PKC+PKG+PKB+PKA+RSK->unsp+PKG+PKB+PKA+RSK | 114823 | LENG8     | apqkqkqkSvskkafnmnf     |
| IP100178150 | 868  | 859  | CKII->cdc2+CKII                           |                                                | 24137  | KIF4A     | epkqrwnaSDileakcalcy    |
| IP100178431 | 193  | 197  | unsp+PKC+cdc2->cdc2                       |                                                | 5965   | RECL      | iyvtpekiakSkmfmsrleka   |
| IP100178431 | 206  | 197  |                                           | unsp+PKC+cdc2->unsp+PKC                        | 5965   | RECL      | iyvtpekiakSkmfmsrleka   |
| IP100178431 | 206  | 202  | CKII->PKA+CKII                            | CKII->unsp+PKG+CKII                            | 5965   | RECL      | ekiaakSkmfmsrleka       |
| IP100178431 | 206  | 208  | ->SRC                                     |                                                | 5965   | RECL      | kmfmsrlekaYearrtriv     |
| IP100178431 | 514  | 511  | unsp+p38MAPK->p38MAPK                     | unsp+p38MAPK->p38MAPK                          | 5965   | RECL      | kqaeelekTlplklidswmg    |
| IP100178431 | 522  | 518  | cdc2->                                    |                                                | 5965   | RECL      | ekltplklidSwmgkgaakir   |
| IP100178440 | 60   | 61   | unsp+PKC+cdc2->unsp+PKC+cdc2+DNAPK        | unsp+PKC+cdc2->unsp+PKC+CKII+cdc2+DNAPK        | 1933   | EEF1B2    | halvyrnhikSyelekasipg   |
| IP100178440 | 60   | 68   | PKA->                                     | PKA->                                          | 1933   | EEF1B2    | hiksyekakaSpgykakgk     |
| IP100178440 | 185  | 182  |                                           | ->EGFR                                         | 1933   | EEF1B2    | wgssklvpvgYgikklqacv    |
| IP100178512 | 792  | 785  | ->cdc2                                    |                                                | 55732  | C1orf112  | anvtveaarkSslapaykrar   |
| IP100178744 | 95   | 94   | unsp+cdc2->cdc2                           | unsp+cdc2->unsp+cdc2+DNAPK                     | 37     | ACADVL    | rpaggaaqesKsfavgmfnk    |
| IP100178744 | 263  | 264  | unsp->                                    | unsp->                                         | 37     | ACADVL    | tsavspcgkyYtngsklwi     |
| IP100178744 | 263  | 265  | INSR->unsp+INSR                           | INSR->unsp+INSR                                | 37     | ACADVL    | savspcgkyYtngsklwi      |
| IP100178744 | 263  | 266  | PKC->                                     |                                                | 37     | ACADVL    | avpspcgkyYtngsklwi      |
| IP100178744 | 263  | 270  | ->cdc2                                    |                                                | 37     | ACADVL    | pcgkytngsklwi           |
| IP100178744 | 300  | 296  | PKC->                                     | PKC->                                          | 37     | ACADVL    | pcgkytngsklwi           |
| IP100178750 | 134  | 137  | unsp+PKC->PKC                             | unsp+PKC->PKC                                  | 80011  | FAM192A   | faktpvtdpaTgavkeltaf    |
| IP100178750 | 135  | 137  | unsp+PKC->PKC                             |                                                | 80011  | FAM192A   | enkevekkITvkiptetnkf    |
| IP100178750 | 139  | 137  | unsp+PKC->                                | unsp+PKC->                                     | 80011  | FAM192A   | enkevekkITvkiptetnkf    |
| IP100178750 | 139  | 143  | unsp+PKC->PKC                             | unsp+PKC->PKC                                  | 80011  | FAM192A   | ekltvkpieTknkfsaqil     |
| IP100178750 | 144  | 143  |                                           | unsp+PKC->unsp+DNAPK                           | 80011  | FAM192A   | ekltvkpieTknkfsaqil     |
| IP100178750 | 144  | 148  | unsp+PKA+DNAPK->PKA+DNAPK                 | unsp+PKA+DNAPK->ATM+DNAPK                      | 80011  | FAM192A   | vkpietnkfsaqilagavk     |
| IP100178750 | 146  | 143  | unsp+PKC->                                | unsp+PKC->PKC                                  | 80011  | FAM192A   | ekltvkpieTknkfsaqil     |
| IP100178750 | 146  | 148  | unsp+PKA+DNAPK->DNAPK                     | unsp+PKA+DNAPK->DNAPK                          | 80011  | FAM192A   | vkpietnkfsaqilagavk     |
| IP100179330 | 6    | 7    |                                           | PKC->unsp+PKC                                  | 7316   | UBC       | -----mqjfvktITgktitlev  |
| IP100179330 | 6    | 12   | ->PKA                                     |                                                | 7316   | UBC       | qifvktITgktitlev        |
| IP100179330 | 11   | 7    | PKC->                                     | PKC->                                          | 7316   | UBC       | -----mqjfvktITgktitlev  |
| IP100179330 | 11   | 9    |                                           | PKC->                                          | 7316   | UBC       | -----mqjfvktITgktitlev  |
| IP100179330 | 113  | 115  | unsp->                                    | unsp->                                         | 7316   | UBC       | yykvdengkiSrlrrecpsde   |
| IP100179330 | 152  | 148  | unsp->                                    | unsp->                                         | 7316   | UBC       | rhyccclitYcnkpedk--     |
| IP100179709 | 40   | 38   | PKC->                                     | PKC->                                          | 113457 | TUBA3D    | hgiapdgampSdktiggddds   |
| IP100179709 | 40   | 41   | ->CKI                                     | ->unsp                                         | 113457 | TUBA3D    | qpdgampsdktiggddsfnt    |
| IP100179709 | 163  | 158  | unsp->unsp+PKA                            |                                                | 113457 | TUBA3D    | gfaslmerISvdygkkskle    |
| IP100179709 | 163  | 165  | unsp+PKG+CKII->unsp+CKII                  | unsp+PKG+CKII->unsp+CKII                       | 113457 | TUBA3D    | erisvdygkSklfaipyp      |

Table S3

|             |      |      |                                   |                                   |                     |        |          |                        |
|-------------|------|------|-----------------------------------|-----------------------------------|---------------------|--------|----------|------------------------|
| IP100179709 | 280  | 282  | EGFR-> unsp                       | EGFR-> unsp+EGFR                  | PhosphoSite         | 113457 | TUBA3D   | yapvisaekaYheqlsvaeit  |
| IP100179709 | 401  | 399  | unsp->                            |                                   |                     | 113457 | TUBA3D   | aridhkfdlmYakrafvhwvy  |
| IP100180240 | 32   | 31   |                                   | unsp->ATM+unsp+DNAPK              |                     | 7117   | TMSL3    | tetateknplpSketieeqeka |
| IP100180240 | 32   | 34   |                                   | -> unsp                           |                     | 7117   | TMSL3    | qeknlpkskeIteeqegaqes  |
| IP100180675 | 40   | 38   | PKC->                             | PKC->                             |                     | 7846   | TUBA1A   | hgipqdgmpgSkktiggddis  |
| IP100180675 | 40   | 41   | ->CKI                             | -> unsp                           |                     | 7846   | TUBA1A   | cpdgqmesdkTisagddsfnt  |
| IP100180675 | 164  | 165  | unsp+PKC+PKG+CKII-> unsp+PKC+CKII | unsp+PKC+PKG+CKII-> unsp+PKC+CKII |                     | 7846   | TUBA1A   | erlsvdygkKSklesfypap   |
| IP100180675 | 401  | 399  | unsp->                            |                                   |                     | 7846   | TUBA1A   | aridhkfdlmYakrafvhwvy  |
| IP100180764 | 171  | 167  | unsp+PKC-> unsp                   | unsp+PKC-> unsp                   | PhosphoSite         | 11143  | MYST2    | mslkdsdgsdIShrprrrrfhe |
| IP100180764 | 199  | 197  | unsp-> CKII                       | unsp->                            |                     | 11143  | MYST2    | tpgcnslghITgkherhsfis  |
| IP100181728 | 276  | 271  | unsp+PKC-> unsp                   | unsp+PKC-> PKC                    |                     | 55299  | BRIX1    | spnmhrrvSitaakyreqkq   |
| IP100182116 | 118  | 120  | ->PKC                             |                                   |                     | 55843  | ARHGAP15 | srriiefykeSkqalsnmkt   |
| IP100182533 | 101  | 102  | INSR->                            |                                   |                     | 6158   | RPL28    | srhmrmknkYtpdrrmaair   |
| IP100182632 | 274  | 273  |                                   | PKC->                             |                     | 80764  | THA7     | rresgrirITkiesqereek   |
| IP100182728 | 434  | 437  | ->CKII                            | ->CKII                            |                     | 9525   | VPS4B    | dhdlkkkTfeefges-       |
| IP100182757 | 287  | 285  | unsp+PKC+CKII-> unsp+CKII         | unsp+PKC+CKII-> unsp+CKII         |                     | 57805  | KIAA1967 | lhhsprqivsSekeaadpaga  |
| IP100183208 | 197  | 200  | PKC->                             |                                   |                     | 26263  | FBXO22   | fhfikdpknlTlerqltevg   |
| IP100183626 | 259  | 258  |                                   | CKI->ATM+CKI+DNAPK                |                     | 5725   | PTBP1    | nacctriridfSkitslnvynk |
| IP100183626 | 259  | 261  |                                   | PKC->                             |                     | 5725   | PTBP1    | ctiridfskITslnvkynndk  |
| IP100183626 | 266  | 261  | PKC->                             | PKC->                             |                     | 5725   | PTBP1    | ctiridfskITslnvkynndk  |
| IP100183626 | 266  | 262  | PKC+cdc2->                        | PKC+cdc2-> cdc2                   |                     | 5725   | PTBP1    | ctiridfskITslnvkynndk  |
| IP100183626 | 554  | 551  | unsp+PKC+PKA-> PKC+PKA            |                                   |                     | 5725   | PTBP1    | digenhlnvSfsksti----   |
| IP100183626 | 554  | 553  |                                   | ->ATM+DNAPK                       |                     | 5725   | PTBP1    | genhlnvSfsksti----     |
| IP100183626 | 554  | 555  | ->PKC                             | ->PKC                             |                     | 5725   | PTBP1    | nhlrvsfskSti-----      |
| IP100183695 | 28   | 27   |                                   | unsp->ATM+unsp+DNAPK              |                     | 6281   | S100A10  | hkfagdkgyITkedrnlmkek  |
| IP100183968 | 119  | 124  | unsp-> unsp+CKI                   |                                   |                     | 7170   | TPM3     | leaeakaadeSergmkvienr  |
| IP100184284 | 54   | 50   |                                   | unsp-> INSR+unsp                  |                     | 51699  | VPS29    | ctgnlctkesYdyiktlagdv  |
| IP100184284 | 54   | 52   | INSR+unsp-> INSR                  |                                   |                     | 51699  | VPS29    | gnlctkesYdyiktlagdvhi  |
| IP100184330 | 216  | 220  | unsp+CKII+PKA-> unsp+CKII         | unsp+CKII+PKA-> unsp+cdc2+CKII    | PhosphoSite         | 4171   | MCM2     | hghnvferiSdmckenresl   |
| IP100184330 | 896  | 892  |                                   | -> unsp                           |                     | 4171   | MCM2     | dseffrmnkfShdlrkmlqk   |
| IP100184533 | 245  | 247  | PKA->CKI                          | PKA->CKI                          |                     | 8237   | USP11    | qcdhrwknSegsldrlydt    |
| IP100184533 | 245  | 250  | unsp+CKI+DNAPK-> CKI+DNAPK        | unsp+CKI+DNAPK-> CKI+DNAPK        |                     | 8237   | USP11    | trlwaknsegSldrlydhit   |
| IP100185027 | 1158 | 1157 |                                   | PKC+cdc2->ATM+PKC+cdc2+DNAPK      |                     | 473    | REER     | tdlyfmpilagSkklakreai  |
| IP100185361 | 517  | 522  | unsp+PKC-> PKC                    | unsp+PKC-> PKC                    |                     | 57696  | DDX55    | rrkfknkawsKqkakkkekkl  |
| IP100185361 | 523  | 522  |                                   | unsp+PKC-> unsp+PKC+DNAPK         |                     | 57696  | DDX55    | rrkfknkawsKqkakkkekkl  |
| IP100185374 | 221  | 219  | unsp+CKII-> CKII                  | unsp+CKII-> CKII                  |                     | 5718   | PSMD12   | intkfqaenTekliklyynl   |
| IP100185374 | 368  | 369  | INSR->                            |                                   |                     | 5718   | PSMD12   | vehnirimakYtritmkrma   |
| IP100185374 | 368  | 370  | INSR->                            | INSR->                            |                     | 5718   | PSMD12   | ehnimarakYtritmkrma    |
| IP100186224 | 141  | 142  | ATM+unsp+PKC->ATM+unsp+PKC+DNAPK  | ATM+unsp+PKC->ATM+unsp+PKC+DNAPK  |                     | 4261   | CIITA    | mempaeavgSKqkrppeepl   |
| IP100186224 | 144  | 142  | ATM+unsp+PKC->ATM+unsp            | ATM+unsp+PKC->ATM+unsp+DNAPK      |                     | 4261   | CIITA    | mempaeavgSKqkrppeepl   |
| IP100186290 | 235  | 232  |                                   | INSR+unsp-> unsp                  | Uniprot             | 1938   | EEF2     | arfkqfaemYakrafvhwvy   |
| IP100186290 | 272  | 265  | INSR+unsp-> unsp                  | INSR+unsp-> unsp                  |                     | 1938   | EEF2     | dmnkklwgrYfdpangfksr   |
| IP100186290 | 275  | 274  |                                   | unsp+PKC->ATM+unsp+PKC+DNAPK      |                     | 1938   | EEF2     | ryfdpangfKSksatspegkl  |
| IP100186290 | 275  | 278  |                                   | CKII->PKC+CKII                    |                     | 1938   | EEF2     | pangfksaTspegklprt     |
| IP100186290 | 426  | 422  | PKC->                             | PKC->                             |                     | 1938   | EEF2     | afgrvsglvStglkvrimpg   |
| IP100186290 | 426  | 422  | unsp+RSK-> PKA+RSK                | unsp+RSK-> unsp+PKA               |                     | 1396   | CRIP1    | keyvfaervtSlgdkwhrpp   |
| IP100186290 | 426  | 422  | PKC->                             | PKC->                             | Uniprot PhosphoSite | 1654   | DDX3X    | gfgkferrgnSrwdcsdssedd |
| IP100186290 | 426  | 422  | unsp+RSK-> PKA+RSK                | unsp+RSK-> unsp+PKA               | Uniprot PhosphoSite | 1654   | RPL38    | vyrrfkgagpTphsttkpvyv  |
| IP100186290 | 426  | 422  | PKC->                             | PKC->                             |                     | 6223   | RPS19    | vlraaflkSkpikvpewwd    |
| IP100186290 | 426  | 422  | unsp+RSK-> PKA+RSK                | unsp+RSK-> unsp+PKA               |                     | 6223   | RPS19    | vyrrfkgagpTphsttkpvyv  |
| IP100186290 | 426  | 422  | PKC->                             | PKC->                             |                     | 6223   | RPS19    | vyrrfkgagpTphsttkpvyv  |
| IP100186290 | 426  | 422  | unsp+RSK-> PKA+RSK                | unsp+RSK-> unsp+PKA               |                     | 6223   | RPS19    | vyrrfkgagpTphsttkpvyv  |
| IP100186290 | 426  | 422  | PKC->                             | PKC->                             |                     | 6223   | RPS19    | vyrrfkgagpTphsttkpvyv  |
| IP100186290 | 426  | 422  | unsp+RSK-> PKA+RSK                | unsp+RSK-> unsp+PKA               |                     | 6223   | RPS19    | vyrrfkgagpTphsttkpvyv  |
| IP100186290 | 426  | 422  | PKC->                             | PKC->                             |                     | 6223   | RPS19    | vyrrfkgagpTphsttkpvyv  |
| IP100186290 | 426  | 422  | unsp+RSK-> PKA+RSK                | unsp+RSK-> unsp+PKA               |                     | 6223   | RPS19    | vyrrfkgagpTphsttkpvyv  |
| IP100186290 | 426  | 422  | PKC->                             | PKC->                             |                     | 6223   | RPS19    | vyrrfkgagpTphsttkpvyv  |
| IP100186290 | 426  | 422  | unsp+RSK-> PKA+RSK                | unsp+RSK-> unsp+PKA               |                     | 6223   | RPS19    | vyrrfkgagpTphsttkpvyv  |
| IP100186290 | 426  | 422  | PKC->                             | PKC->                             |                     | 6223   | RPS19    | vyrrfkgagpTphsttkpvyv  |
| IP100186290 | 426  | 422  | unsp+RSK-> PKA+RSK                | unsp+RSK-> unsp+PKA               |                     | 6223   | RPS19    | vyrrfkgagpTphsttkpvyv  |
| IP100186290 | 426  | 422  | PKC->                             | PKC->                             |                     | 6223   | RPS19    | vyrrfkgagpTphsttkpvyv  |
| IP100186290 | 426  | 422  | unsp+RSK-> PKA+RSK                | unsp+RSK-> unsp+PKA               |                     | 6223   | RPS19    | vyrrfkgagpTphsttkpvyv  |
| IP100186290 | 426  | 422  | PKC->                             | PKC->                             |                     | 6223   | RPS19    | vyrrfkgagpTphsttkpvyv  |
| IP100186290 | 426  | 422  | unsp+RSK-> PKA+RSK                | unsp+RSK-> unsp+PKA               |                     | 6223   | RPS19    | vyrrfkgagpTphsttkpvyv  |
| IP100186290 | 426  | 422  | PKC->                             | PKC->                             |                     | 6223   | RPS19    | vyrrfkgagpTphsttkpvyv  |
| IP100186290 | 426  | 422  | unsp+RSK-> PKA+RSK                | unsp+RSK-> unsp+PKA               |                     | 6223   | RPS19    | vyrrfkgagpTphsttkpvyv  |
| IP100186290 | 426  | 422  | PKC->                             | PKC->                             |                     | 6223   | RPS19    | vyrrfkgagpTphsttkpvyv  |
| IP100186290 | 426  | 422  | unsp+RSK-> PKA+RSK                | unsp+RSK-> unsp+PKA               |                     | 6223   | RPS19    | vyrrfkgagpTphsttkpvyv  |
| IP100186290 | 426  | 422  | PKC->                             | PKC->                             |                     | 6223   | RPS19    | vyrrfkgagpTphsttkpvyv  |
| IP100186290 | 426  | 422  | unsp+RSK-> PKA+RSK                | unsp+RSK-> unsp+PKA               |                     | 6223   | RPS19    | vyrrfkgagpTphsttkpvyv  |
| IP100186290 | 426  | 422  | PKC->                             | PKC->                             |                     | 6223   | RPS19    | vyrrfkgagpTphsttkpvyv  |
| IP100186290 | 426  | 422  | unsp+RSK-> PKA+RSK                | unsp+RSK-> unsp+PKA               |                     | 6223   | RPS19    | vyrrfkgagpTphsttkpvyv  |
| IP100186290 | 426  | 422  | PKC->                             | PKC->                             |                     | 6223   | RPS19    | vyrrfkgagpTphsttkpvyv  |
| IP100186290 | 426  | 422  | unsp+RSK-> PKA+RSK                | unsp+RSK-> unsp+PKA               |                     | 6223   | RPS19    | vyrrfkgagpTphsttkpvyv  |
| IP100186290 | 426  | 422  | PKC->                             | PKC->                             |                     | 6223   | RPS19    | vyrrfkgagpTphsttkpvyv  |
| IP100186290 | 426  | 422  | unsp+RSK-> PKA+RSK                | unsp+RSK-> unsp+PKA               |                     | 6223   | RPS19    | vyrrfkgagpTphsttkpvyv  |
| IP100186290 | 426  | 422  | PKC->                             | PKC->                             |                     | 6223   | RPS19    | vyrrfkgagpTphsttkpvyv  |
| IP100186290 | 426  | 422  | unsp+RSK-> PKA+RSK                | unsp+RSK-> unsp+PKA               |                     | 6223   | RPS19    | vyrrfkgagpTphsttkpvyv  |
| IP100186290 | 426  | 422  | PKC->                             | PKC->                             |                     | 6223   | RPS19    | vyrrfkgagpTphsttkpvyv  |
| IP100186290 | 426  | 422  | unsp+RSK-> PKA+RSK                | unsp+RSK-> unsp+PKA               |                     | 6223   | RPS19    | vyrrfkgagpTphsttkpvyv  |
| IP100186290 | 426  | 422  | PKC->                             | PKC->                             |                     | 6223   | RPS19    | vyrrfkgagpTphsttkpvyv  |
| IP100186290 | 426  | 422  | unsp+RSK-> PKA+RSK                | unsp+RSK-> unsp+PKA               |                     | 6223   | RPS19    | vyrrfkgagpTphsttkpvyv  |
| IP100186290 | 426  | 422  | PKC->                             | PKC->                             |                     | 6223   | RPS19    | vyrrfkgagpTphsttkpvyv  |
| IP100186290 | 426  | 422  | unsp+RSK-> PKA+RSK                | unsp+RSK-> unsp+PKA               |                     | 6223   | RPS19    | vyrrfkgagpTphsttkpvyv  |
| IP100186290 | 426  | 422  | PKC->                             | PKC->                             |                     | 6223   | RPS19    | vyrrfkgagpTphsttkpvyv  |
| IP100186290 | 426  | 422  | unsp+RSK-> PKA+RSK                | unsp+RSK-> unsp+PKA               |                     | 6223   | RPS19    | vyrrfkgagpTphsttkpvyv  |
| IP100186290 | 426  | 422  | PKC->                             | PKC->                             |                     | 6223   | RPS19    | vyrrfkgagpTphsttkpvyv  |
| IP100186290 | 426  | 422  | unsp+RSK-> PKA+RSK                | unsp+RSK-> unsp+PKA               |                     | 6223   | RPS19    | vyrrfkgagpTphsttkpvyv  |
| IP100186290 | 426  | 422  | PKC->                             | PKC->                             |                     | 6223   | RPS19    | vyrrfkgagpTphsttkpvyv  |
| IP100186290 | 426  | 422  | unsp+RSK-> PKA+RSK                | unsp+RSK-> unsp+PKA               |                     | 6223   | RPS19    | vyrrfkgagpTphsttkpvyv  |
| IP100186290 | 426  | 422  | PKC->                             | PKC->                             |                     | 6223   | RPS19    | vyrrfkgagpTphsttkpvyv  |
| IP100186290 | 426  | 422  | unsp+RSK-> PKA+RSK                | unsp+RSK-> unsp+PKA               |                     | 6223   | RPS19    | vyrrfkgagpTphsttkpvyv  |
| IP100186290 | 426  | 422  | PKC->                             | PKC->                             |                     | 6223   | RPS19    | vyrrfkgagpTphsttkpvyv  |
| IP100186290 | 426  | 422  | unsp+RSK-> PKA+RSK                | unsp+RSK-> unsp+PKA               |                     | 6223   | RPS19    | vyrrfkgagpTphsttkpvyv  |
| IP100186290 | 426  | 422  | PKC->                             | PKC->                             |                     | 6223   | RPS19    | vyrrfkgagpTphsttkpvyv  |
| IP100186290 | 426  | 422  | unsp+RSK-> PKA+RSK                | unsp+RSK-> unsp+PKA               |                     | 6223   | RPS19    | vyrrfkgagpTphsttkpvyv  |
| IP100186290 | 426  | 422  | PKC->                             | PKC->                             |                     | 6223   | RPS19    | vyrrfkgagpTphsttkpvyv  |
| IP100186290 | 426  | 422  | unsp+RSK-> PKA+RSK                | unsp+RSK-> unsp+PKA               |                     | 6223   | RPS19    | vyrrfkgagpTphsttkpvyv  |
| IP100186290 | 426  | 422  | PKC->                             | PKC->                             |                     | 6223   | RPS19    | vyrrfkgagpTphsttkpvyv  |
| IP100186290 | 426  | 422  | unsp+RSK-> PKA+RSK                | unsp+RSK-> unsp+PKA               |                     | 6223   | RPS19    | vyrrfkgagpTphsttkpvyv  |
| IP100186290 | 426  | 422  | PKC->                             | PKC->                             |                     | 6223   | RPS19    | vyrrfkgagpTphsttkpvyv  |
| IP100186290 | 426  | 422  | unsp+RSK-> PKA+RSK                | unsp+RSK-> unsp+PKA               |                     | 6223   | RPS19    | vyrrfkgagpTphsttkpvyv  |
| IP100186290 | 426  | 422  | PKC->                             | PKC->                             |                     | 6223   | RPS19    | vyrrfkgagpTphsttkpvyv  |
| IP100186290 | 426  | 422  | unsp+RSK-> PKA+RSK                | unsp+RSK-> unsp+PKA               |                     | 6223   | RPS19    | vyrrfkgagpTphsttkpvyv  |
| IP100186290 | 426  | 422  | PKC->                             | PKC->                             |                     | 6223   | RPS19    | vyrrfkgagpTphsttkpvyv  |
| IP100186290 | 426  | 422  | unsp+RSK-> PKA+RSK                | unsp+RSK-> unsp+PKA               |                     | 6223   | RPS19    | vyrrfkgagpTphsttkpvyv  |
| IP100186290 | 426  | 422  | PKC->                             | PKC->                             |                     | 6223   | RPS19    | vyrrfkgagpTphsttkpvyv  |
| IP100186290 | 426  | 422  | unsp+RSK-> PKA+RSK                | unsp+RSK-> unsp+PKA               |                     | 6223   | RPS19    | vyrrfkgagpTphsttkpvyv  |
| IP100186290 | 426  | 422  | PKC->                             | PKC->                             |                     | 6223   | RPS19    | vyrrfkgagpTphsttkpvyv  |
| IP100186290 | 426  | 422  | unsp+RSK-> PKA+RSK                | unsp+RSK-> unsp+PKA               |                     | 6223   | RPS19    | vyrrfkgagpTphsttkpvyv  |
| IP100186290 | 426  | 422  | PKC->                             | PKC->                             |                     | 6223   | RPS19    | vyrrfkgagpTphsttkpvyv  |
| IP100186290 | 426  | 422  | unsp+RSK-> PKA+RSK                | unsp+RSK-> unsp+PKA               |                     | 6223   | RPS19    | vyrrfkgagpTphsttkpvyv  |
| IP100186290 | 426  | 422  | PKC->                             | PKC->                             |                     | 6223   | RPS19    | vyrrfkgagpTphsttkpvyv  |
| IP100186290 | 426  | 422  | unsp+RSK-> PKA+RSK                | unsp+RSK-> unsp+PKA               |                     | 6223   | RPS19    | vyrrfkgagpTphsttkpvyv  |
| IP100186290 | 426  | 422  | PKC->                             | PKC->                             |                     | 6223   | RPS19    | vyrrfkgagpTphsttkpvyv  |
| IP100186290 | 426  | 422  | unsp+RSK-> PKA+RSK                | unsp+RSK-> unsp+PKA               |                     | 6223   | RPS19    | vyrrfkgagpTphsttkpvyv  |
| IP100186290 | 426  | 422  | PKC->                             | PKC->                             |                     | 6223   | RPS19    | vyrrfkgagpTphsttkpvyv  |
| IP100186290 | 426  | 422  | unsp+RSK-> PKA+RSK                | unsp+RSK-> unsp+PKA               |                     | 6223   | RPS19    | vyrrfkgagpTphsttkpvyv  |
| IP100186290 | 426  | 422  | PKC->                             | PKC->                             |                     | 6223   | RPS19    | vyrrfkgagpTphsttkpvyv  |
| IP100186290 | 426  | 422  | unsp+RSK-> PKA+RSK                | unsp+RSK-> unsp+PKA               |                     | 6223   | RPS19    | vyrrfkgagpTphsttkpvyv  |
| IP100186290 | 426  | 422  | PKC->                             | PKC->                             |                     | 6223   | RPS19    | vyrrfkgagpTphsttkpvyv  |
| IP100186290 | 426  | 422  | unsp+RSK-> PKA+RSK</              |                                   |                     |        |          |                        |

Table S3

|             |      |      |                                  |                                            |                              |          |                      |                        |
|-------------|------|------|----------------------------------|--------------------------------------------|------------------------------|----------|----------------------|------------------------|
| IP100217018 | 1259 | 1267 | unsp+PKG->unsp+PKG+cdc2          |                                            |                              | 54809    | SAMD9                | ltklfslkKsdfdddeyfvI   |
| IP100217030 | 22   | 24   | ->PKC                            |                                            |                              | 6191     | RP54X                | apkhwmldkTgVfprpstg    |
| IP100217030 | 134  |      |                                  | PKC->PKC+DNAPK                             |                              | 6191     | RP54X                | lckvkrfvGtKgphlvthd    |
| IP100217049 | 378  | 375  | PKC->                            | PKC->                                      |                              | 4939     | OAS2                 | qidsavniirTlkenctrs    |
| IP100217223 | 79   | 83   | unsp+PKC+cdc2->cdc2              |                                            |                              | 10606    | PAICS                | knhlegkaaSvksotqfql    |
| IP100217240 | 466  | 463  | PKC->                            | PKC->                                      |                              | 84128    | WDR75                | akeesegpIvTaskdyfkwv   |
| IP100217240 | 466  | 465  | unsp->CKI+DNAPK                  | unsp->ATM+unsp+DNAPK                       |                              | 84128    | WDR75                | kseoptIvASkdgyfkwvll   |
| IP100217240 | 466  | 469  | INSR+unsp->unsp                  | INSR+unsp->unsp                            |                              | 84128    | WDR75                | ptlvtaskdgyfkwvlltdds  |
| IP100217259 | 511  | 508  |                                  |                                            |                              | 61555    | TEX14                | drtmnldqirYlknldkdf    |
| IP100217259 | 515  | 518  | PKC->                            |                                            | PhosphoSite                  | 61555    | TEX14                | ylknldkdfTgaqrtpqtes   |
| IP100217324 | 482  | 483  |                                  | unsp->INSR+unsp                            |                              | 23759    | PPII2                | pqtfrqgvqYInpaateqqr   |
| IP100217354 | 231  | 230  | PKC->                            | PKC->                                      |                              | 55738    | ARFGAP1              | rfsaaakegaTKfsgsqasqlf |
| IP100217354 | 231  | 234  | PKC+DNAPK->ATM+DNAPK             |                                            |                              | 55738    | ARFGAP1              | aakegatKfG5sqasqlfwhgk |
| IP100217465 | 63   | 55   | unsp->unsp+PKA                   | unsp->unsp+PKA                             |                              | 3006     | HIST1H1C             | tkavaaskerSvgsalaalka  |
| IP100217465 | 63   | 58   | PKC->PKA                         | PKC->                                      |                              | 3006     | HIST1H1C             | vaaskersvSlaalkalaa    |
| IP100217466 | 64   | 56   | unsp->unsp+PKA                   | unsp->unsp+PKA                             |                              | 3007     | HIST1H1D             | tkavaaskerSvgsalaalka  |
| IP100217466 | 64   | 59   | PKC->PKA                         | PKC->                                      |                              | 3007     | HIST1H1D             | vaaskersvSlaalkalaa    |
| IP100217467 | 46   | 51   | unsp+PKC+cdc2->unsp+CKI+PKC+cdc2 | unsp+PKC+cdc2->unsp+cdc2                   |                              | 3008     | HIST1H1E             | selitkaavaSkersvslaa   |
| IP100217467 | 63   | 55   | unsp->unsp+PKA                   | unsp->unsp+PKA                             |                              | 3008     | HIST1H1E             | tkavaaskerSvgsalaalka  |
| IP100217467 | 63   | 58   | PKC->PKA                         | PKC->                                      |                              | 3008     | HIST1H1E             | vaaskersvSlaalkalaa    |
| IP100217467 | 90   | 86   | PKC->PKA                         | PKC->PKA                                   |                              | 3008     | HIST1H1E             | nsnrkigIvSvsgktlvtq    |
| IP100217467 | 90   | 89   | ->PKA                            | ->PKA                                      |                              | 3008     | HIST1H1E             | nkligIvSvsgktlvtq      |
| IP100217467 | 90   | 92   | unsp+PKC->CKI+PKC                | unsp+PKC->CKI+PKC                          |                              | 3008     | HIST1H1E             | nkligIvSvsgktlvtq      |
| IP100217467 | 168  | 177  | unsp+PKC+RSK->unsp+PKC           | unsp+PKC->unsp+CKI+PKC                     | PHOsphoELM PhosphoSite       | 3008     | HIST1H1E             | nkligIvSvsgktlvtq      |
| IP100217468 | 109  | 105  | PKC->PKA                         | PKC->PKA                                   |                              | 3009     | HIST1H1B             | tlvgtktgaSvSgfklnkkaa  |
| IP100217468 | 109  | 107  | unsp+PKC->PKC                    | unsp+PKC->PKC                              |                              | 3009     | HIST1H1B             | vqtkgtgagSvSfknkkaasg  |
| IP100217468 | 168  | 173  |                                  | unsp+PKC+GSK3+cdk5->unsp+PKC+GSK3+cdk5+p3l | PHOsphoELM PhosphoSite       | 3009     | HIST1H1B             | aaagvkvakSpkkaakaap    |
| IP100217469 | 88   | 89   | ->PKC+PKA                        | ->PKC+PKA                                  |                              | 3024     | HIST1H1A             | nsnrkigIvSvsgktlvtq    |
| IP100217469 | 88   | 92   | unsp->                           | ->PKA                                      |                              | 3024     | HIST1H1A             | nkligIvSvsgktlvtq      |
| IP100217469 | 93   | 89   | ->PKA                            | ->PKA                                      |                              | 3024     | HIST1H1A             | nsnrkigIvSvsgktlvtq    |
| IP100217469 | 93   | 92   | unsp->unsp+PKA                   | unsp+PKC->unsp+PKA                         |                              | 3024     | HIST1H1A             | nkligIvSvsgktlvtq      |
| IP100217469 | 93   | 95   | unsp+PKC->CKI+PKC                | unsp+PKC->unsp+CKI+PKC                     |                              | 3024     | HIST1H1A             | nkligIvSvsgktlvtq      |
| IP100217477 | 12   | 14   | unsp+PKG+PKA->PKG                | unsp+PKG+PKA->unsp+PKG                     |                              | 3149     | HMG83                | gdpkpkpkmSayafvgtqr    |
| IP100217477 | 59   | 58   | unsp->unsp+PKA                   |                                            |                              | 3149     | HMG83                | rwkmtsgkekSkfdemakadk  |
| IP100217477 | 145  | 144  |                                  | PKC->ATM                                   |                              | 3149     | HMG83                | lndsekapvITkaakikekeye |
| IP100217477 | 145  | 153  | unsp->INSR+unsp                  |                                            |                              | 3149     | HMG83                | itkaakikekYekdvadyksf  |
| IP100217660 | 113  | 112  |                                  | PKC->PKC+DNAPK                             |                              | 84148    | MYST1                | ewwdknrlalTvtvkdavqkn  |
| IP100217660 | 238  | 241  | unsp->                           | unsp->                                     |                              | 84148    | MYST1                | qwrppgkIvYrksnisvvey   |
| IP100217686 | 20   | 16   | ->PKC                            | ->PKC                                      |                              | 117246   | FTSJ3                | kwqsrdrkIvYlaketgyrs   |
| IP100217686 | 20   | 22   | ->PKC                            | ->PKC                                      |                              | 117246   | FTSJ3                | rdklylaketIvYrksafkl   |
| IP100217686 | 20   | 24   | unsp->                           | ->PKA                                      |                              | 117246   | FTSJ3                | kyfIhaketIvYrksafkl    |
| IP100217773 | 701  | 697  | PKC->                            | PKC->                                      |                              | 26009    | ZZZ3                 | lgnrtakqvaSrvqykflkt   |
| IP100217773 | 725  | 724  |                                  | PKC->ATM+PKC+DNAPK                         |                              | 26009    | ZZZ3                 | pgtrpnlyIvSksstsrqhh   |
| IP100217773 | 725  | 727  | unsp->unsp+PKC                   |                                            |                              | 26009    | ZZZ3                 | tnplyyskSstsrqhh       |
| IP100217773 | 725  | 729  | unsp+PKC->PKC                    | unsp+PKC->PKC                              |                              | 26009    | ZZZ3                 | tnplyyskSstsrqhh       |
| IP100217773 | 726  | 727  | unsp->unsp+PKC                   | unsp->unsp+PKC                             |                              | 26009    | ZZZ3                 | tnplyyskSstsrqhh       |
| IP100217773 | 726  | 729  | unsp+PKC->PKC+cdc2               | unsp+PKC->PKC                              |                              | 26009    | ZZZ3                 | tnplyyskSstsrqhh       |
| IP100217773 | 738  | 744  | cdc2->PKA+cdc2                   |                                            |                              | 26009    | ZZZ3                 | hplnkIvSfstmshheppv    |
| IP100217871 | 402  | 409  | ->PKA                            |                                            |                              | 8659     | ALDH4A1              | nrkIvleharSpslilagg    |
| IP100217872 | 34   | 38   | PKC->cdc2                        | PKC->PKC+cdc2                              |                              | 5236     | PGM1                 | apvhdqgkSjlrktyfye     |
| IP100217872 | 475  | 471  | cdc2->                           | unsp->                                     |                              | 5236     | PGM1                 | kdlealmfdrSfvqkqfsand  |
| IP100217872 | 475  | 478  | unsp->                           | unsp->                                     |                              | 5236     | PGM1                 | fdrsfvqkqfSandkvtyvek  |
| IP100217920 | 50   | 56   | unsp+PKA->unsp+cdc2+PKA          |                                            | 126133                       | ALDH16A1 | gkwlphehmSvpqcdpitge |                        |
| IP100217950 | 82   | 77   | PKC->                            | PKC->                                      |                              | 3151     | HMG2                 | nnpaengdakTdaqkaeag    |
| IP100217963 | 162  | 165  | unsp->GSK3+cdc2                  | unsp->cdc2                                 |                              | 3868     | KRT16                | rrqrpsidkySpyfktiedr   |
| IP100217975 | 33   | 28   | unsp+PKC+PKA->unsp+PKA           | unsp+PKC+PKA->unsp+PKA                     | Uniprot PHOsphoELM           | 4001     | LMBN1                | pttlpslprISrlekeelre   |
| IP100217975 | 123  | 126  | cdc2+PKA->PKG+cdc2+PKA           |                                            |                              | 4001     | LMBN1                | qllnyakkeSdlngagiklr   |
| IP100217975 | 124  | 126  | cdc2+PKA->cdc2                   | cdc2+PKA->cdc2                             |                              | 4001     | LMBN1                | alatalgdkISlegdelldk   |
| IP100217975 | 157  | 158  |                                  | PKC->                                      |                              | 4001     | LMBN1                | gwmirkigdtSvsvkytsry   |
| IP100217975 | 483  | 478  | PKC->                            | PKC+cdc2->unsp+PKA+cdc2                    |                              | 4001     | LMBN1                | wemirkigdtSvsvkytsry   |
| IP100217975 | 483  | 479  | PKC+cdc2->unsp+PKA+cdc2          | unsp+PKC+cdc2->cdc2                        |                              | 4001     | LMBN1                | mirkigdtSvsvkytsry     |
| IP100217975 | 483  | 481  | unsp+PKC+cdc2->cdc2              | PKC->unsp+PKC                              |                              | 4001     | LMBN1                | igdtSvsvkytsryvkgatq   |
| IP100218130 | 316  | 315  | unsp+PKC->PKC+PKA                | unsp+PKC->ATM+unsp                         |                              | 5837     | PYGM                 | ldiirfrksSkfgrcdprvt   |
| IP100218187 | 147  | 144  | ->EGFR                           | ->EGFR                                     |                              | 5501     | PPP1CC               | ygyfdeckrYlnikwktfdd   |
| IP100218240 | 779  | 778  | unsp+PKC->unsp+PKA               | unsp+PKC->ATM+unsp+DNAPK                   |                              | 7468     | WHSC1                | hasnpnpprSKgkmrmrcvr   |
| IP100218240 | 781  | 778  | unsp+PKC->unsp+PKA               | unsp+PKC->unsp+PKA                         |                              | 7468     | WHSC1                | hasnpnpprSKgkmrmrcvr   |
| IP100218342 | 56   | 49   | ->cdc2                           |                                            |                              | 4522     | MTHFD1               | ailvgvnrddSnlvynklka   |
| IP100218342 | 553  | 551  | PKC->                            | PKC->                                      |                              | 4522     | MTHFD1               | lkrigtqapTekghtrtaqf   |
| IP100218343 | 40   | 38   | PKC->                            | PKC->                                      |                              | 84790    | TUBA1C               | hgiqpdgampSdktiggddds  |
| IP100218343 | 40   | 41   | ->CKI                            | ->unsp                                     | Uniprot                      | 84790    | TUBA1C               | qpdgampsdkTiggddsfnt   |
| IP100218343 | 60   | 56   | PKC->                            | PKC->                                      |                              | 84790    | TUBA1C               | ddsfntfseTgagkhvprav   |
| IP100218343 | 112  | 109  | unsp->                           |                                            |                              | 84790    | TUBA1C               | aannvarghyTigkeidvI    |
| IP100218343 | 163  | 158  | unsp+cdc2->unsp+PKA              |                                            | PhosphoSite                  | 84790    | TUBA1C               | gftsilmerSvdygksskle   |
| IP100218343 | 163  | 165  | unsp+PKC+PKG+CKII->unsp+PKC+CKII | unsp+PKC+PKG+CKII->unsp+CKII               | PhosphoSite                  | 84790    | TUBA1C               | erlsdvdygkSklsvvypap   |
| IP100218343 | 164  | 165  | unsp+PKC+PKG+CKII->unsp+PKC+CKII | EGFR->unsp+EGFR                            | PhosphoSite                  | 84790    | TUBA1C               | yspavisaekATheglvaeit  |
| IP100218343 | 280  | 282  | EGFR->unsp+EGFR                  |                                            |                              | 84790    | TUBA1C               | mvcddprhngYmaccllyrgd  |
| IP100218343 | 311  | 312  |                                  | ->INSR                                     |                              | 84790    | TUBA1C               | aridhkfdlmYakrafvhwv   |
| IP100218343 | 401  | 399  | unsp->                           | PKA->PKC                                   |                              | 221823   | PRPS1L1              | spdagakrvYsiadqlnvdf   |
| IP100218371 | 176  | 179  | PKA->                            |                                            |                              | 221823   | PRPS1L1              | pdagakrvYsiadqlnvdf    |
| IP100218371 | 176  | 180  | unsp+PKA+RSK->unsp+PKA           | unsp+PKC->PKA                              |                              | 3015     | H2AF2                | -maggkagdtSgaktakavr   |
| IP100218448 | 12   | 10   | unsp+PKC->                       | unsp+PKC->unsp+PKA                         |                              | 3015     | H2AF2                | -maggkagdtSgaktakavr   |
| IP100218448 | 14   | 10   | unsp+PKC->unsp+PKA               | PKC->unsp+PKC                              |                              | 3015     | H2AF2                | bagkdgakIvKavsrpraq    |
| IP100218448 | 14   | 15   |                                  | PKC->unsp+PKC                              |                              | 3015     | H2AF2                | dsqaktkavSrsraglofp    |
| IP100218465 | 529  | 525  | PKC->                            | PKC->                                      |                              | 9373     | PLAA                 | dpftgsnaysrSaasaktmnyf |
| IP100218465 | 529  | 528  | unsp+PKC->unsp                   | unsp+PKC->ATM+unsp+DNAPK                   |                              | 9373     | PLAA                 | tgnsaysrSaaSktmnyfppk  |
| IP100218488 | 31   | 29   | PKC->                            | PKC->                                      |                              | 2779     | GNAT1                | lkedaekdarTvklilgag    |
| IP100218488 | 31   | 40   | unsp+PKC->unsp+PKC+cdc2          | unsp+PKC->unsp+PKC+cdc2                    |                              | 2779     | GNAT1                | vkililgagSgsktqvkmk    |
| IP100218591 | 38   | 37   | unsp->                           |                                            | PhosphoSite                  | 6426     | SFRS1                | irtkdiedvYfygairdidi   |
| IP100218591 | 179  | 178  |                                  | PKC->PKC+DNAPK                             |                              | 6426     | SFRS1                | mytavrvklndTfkrshfcls  |
| IP100218624 | 16   | 11   | PKC->                            | PKC->                                      |                              | 6651     | SON                  | matnieqlrTSvsvkreiq    |
| IP100218624 | 16   | 15   | unsp+PKC->unsp                   | unsp+PKC->ATM+unsp                         |                              | 6651     | SON                  | esvrlvskIvSktreagqels  |
| IP100218624 | 288  | 282  | unsp+PKC->unsp+PKA               | unsp+CKII->unsp+cdc2+CKII                  |                              | 6651     | SON                  | mskvlsvsvesTspesklmly  |
| IP100218624 | 288  | 287  | unsp->unsp+PKA                   | unsp->ATM+unsp+DNAPK                       |                              | 6651     | SON                  | ksvestspesSkmlvveppva  |
| IP100218624 | 2095 | 2091 | unsp+cdc2->unsp                  | unsp+cdc2->cdc2                            |                              | 6651     | SON                  | sergrsprkITldlkaqlel   |
| IP100218728 | 53   | 47   | INSR->                           | INSR->                                     |                              | 5048     | PAFAH1B1             | ldvneeldkYagllekkwts   |
| IP100218728 | 53   | 57   | unsp+PKC->                       |                                            |                              | 5048     | PAFAH1B1             | yagllekkwtSvirlqkvme   |
| IP100218748 | 76   | 79   | unsp->                           |                                            |                              | 1415     | CRYBB2               | geqvfekgeYprwdswtssr   |
| IP100218748 | 76   | 84   | unsp+PKA->unsp                   |                                            |                              | 1415     | CRYBB2               | fekgeypnwdSwtssrttdsl  |
| IP100218748 | 120  | 118  | PKC->                            | PKC->                                      | iprot PHOsphoELM PhosphoSi   | 1415     | CRYBB2               | kliiyenpnlTgkmeidd     |
| IP100218748 | 121  | 118  | PKC->                            | PKC->                                      | Uniprot PHOsphoELM PhosphoSi | 1415     | CRYBB2               | kliiyenpnlTgkmeidd     |
| IP100218823 | 2296 | 2295 | unsp->                           |                                            |                              | 9757     | MLL4                 | sgrspappYkapridedge    |
| IP100218829 | 108  | 105  | PKC->                            | PKC->                                      |                              | 2935     | GSPT1                | myltgmvdvKTlekyereake  |
| IP100218829 | 196  | 192  | unsp+CKII->CKII                  | unsp+CKII->CKII                            |                              | 2935     | GSPT1                | visarkgefeTgkkggqtre   |
| IP100218829 | 196  | 200  | unsp->                           | unsp->                                     |                              | 2935     | GSPT1                | fetgkkggqTrehamlakta   |
| IP100218829 | 469  | 467  | unsp+PKC->PKC                    | unsp+PKC->PKC                              |                              | 2935     | GSPT1                | lratgticleTfkdfpqmgrf  |
| IP100218831 | 126  | 127  | unsp->                           | unsp->                                     |                              | 2944     | GSTM1                | npfeklplkYleelpelikl   |
| IP100218836 | 36   | 35   | PKC->                            | PKC->                                      |                              | 1622     | DBI                  | kaaeerhIKTPdsdeemflf   |
| IP100218836 | 36   | 38   | unsp+PKG+CKII->unsp+CKII         | unsp+PKG+CKII->unsp+CKII                   |                              | 1622     | DBI                  | esvrlvskIvSktreagqels  |
| IP100218836 | 72   | 68   | PKC->                            |                                            |                              | 1622     | DBI                  | nterpgmldfTgkavdawne   |
| IP100218836 | 94   | 91   |                                  | unsp->                                     |                              | 1622     | DBI                  | gtskedamkaYinkveelkkk  |
| IP100218914 | 128  | 129  |                                  | PKC->unsp+PKC                              |                              | 216      | ALDH1A1              | yndlagcikTlrycagwadk   |
| IP100218914 | 419  | 413  | unsp->unsp+PKA                   |                                            |                              | 216      | ALDH1A1              | gpvqimikfKslddvikrann  |
| IP100218914 | 435  | 434  |                                  | ->DNAPK                                    |                              | 216      | ALDH1A1              | tfyglagvYTKiddkaitis   |
| IP100218914 | 495  | 497  | ATM+unsp->ATM+unsp+PKC           |                                            |                              | 216      | ALDH1A1              | tevtktvtvkiSqkns-----  |
| IP100218914 | 495  | 501  | ->PKA                            |                                            |                              | 216      | ALDH1A1              | tvtvkisqknS-----       |
| IP100218918 | 239  | 241  | PKC+cdc2->PKC                    |                                            |                              | 301      | ANXA1                | pqlrvfkyTyskshdmnkv    |
| IP100218918 | 239  | 243  | unsp->                           | unsp->                                     |                              | 301      | ANXA1                | lrvfkyTyskshdmnkvld    |
| IP100218918 | 239  | 244  | unsp+PKG->unsp                   |                                            |                              | 301      | ANXA1                | rvfkyTyskshdmnkvld     |
| IP100218918 | 242  | 241  |                                  | PKC+cdc2->PKC                              |                              | 301      | ANXA1                | pqlrvfkyTyskshdmnkv    |
| IP100218918 | 242  | 243  | unsp->                           | unsp->                                     |                              | 301      | ANXA1                | lrvfkyTyskshdmnkvld    |
| IP100218918 | 242  | 244  | unsp+PKG->unsp+PKC               |                                            |                              | 301      | ANXA1                | rvfkyTyskshdmnkvld     |
| IP100218918 | 250  | 241  |                                  | PKC+cdc2->PKC                              |                              | 301      | ANXA1                | pqlrvfkyTyskshdmnkv    |
| IP100218918 | 312  | 304  | unsp+CKII->unsp+cdc2+CKII        |                                            |                              | 301      | ANXA1                | kalirimvsvSeidmdikaf   |
| IP100218918 | 312  | 315  | EGFR->                           |                                            |                              | 301      | ANXA1                | eidmdikafYqkmygisicq   |
| IP100218922 | 527  | 523  |                                  | unsp+PKC+PKG->PKC+PKG                      |                              | 11231    | SEC63                | wqqkskpgpKtakskkklpk   |
| IP100218971 | 202  | 2    |                                  |                                            |                              |          |                      |                        |

Table S3

|             |      |      |                                                   |                                                   |        |                        |                                 |
|-------------|------|------|---------------------------------------------------|---------------------------------------------------|--------|------------------------|---------------------------------|
| IP100219005 | 274  | 270  | cdc2->                                            | cdc2-> unsp                                       | 2288   | FKBP4                  | emseekleqStivkergrtyv           |
| IP100219005 | 274  | 271  | unsp->                                            | unsp->                                            | 2288   | FKBP4                  | mnsseekleqStivkergrtyv          |
| IP100219005 | 274  | 278  | unsp+PKC->                                        | unsp+PKC->PKC                                     | 2288   | FKBP4                  | eqstivkergrtyvfyf               |
| IP100219005 | 282  | 278  | unsp+PKC-> unsp+PKA                               | unsp+PKC->PKA                                     | 2288   | FKBP4                  | eqstivkergrtyvfyf               |
| IP100219018 | 61   | 59   | unsp+PKC->PKC                                     | unsp+PKC->PKC                                     | 2597   | GAPDH                  | ydsthkfingTvkvaefskv            |
| IP100219018 | 117  | 122  | PKA->                                             | PKA->                                             | 2597   | GAPDH                  | lsggagrviSaspadaprvf            |
| IP100219018 | 186  | 184  |                                                   | DNAPK-> ATM+DNAPK                                 | 2597   | GAPDH                  | lmtvtaitaTqktvdpsgk             |
| IP100219018 | 186  | 187  |                                                   | -> unsp                                           | 2597   | GAPDH                  | tvhataitqTvdpsgklwr             |
| IP100219018 | 194  | 192  | unsp->                                            | unsp->                                            | 2597   | GAPDH                  | tatqktvdpsgklwrdrgra            |
| IP100219018 | 334  | 333  | unsp-> PKA                                        | unsp-> ATM+unsp+DNAPK                             | 2597   | GAPDH                  | rvvdlmahmaSke-----              |
| IP100219037 | 6    | 2    | PKC->                                             |                                                   | 3014   | H2AFX                  | -----mSgrgktgkar                |
| IP100219037 | 6    | 7    | unsp-> unsp+PKC                                   | unsp-> unsp+PKC                                   | 3014   | H2AFX                  | -----msrggkTgkarakaks           |
| IP100219037 | 10   | 7    | unsp-> unsp+PKA                                   |                                                   | 3014   | H2AFX                  | -----msrggkTgkarakaks           |
| IP100219037 | 119  | 121  | PKG->                                             | PKG->                                             | 3014   | H2AFX                  | -----msrggkTgkarakaks           |
| IP100219038 | 10   | 12   | unsp+PKC+PKG-> PKC                                | unsp+PKC+PKG-> unsp+PKC                           | 644914 | Uniprot                | LOC644914 artqtarkStgkaprkla    |
| IP100219038 | 15   | 11   |                                                   | unsp-> unsp+PKG                                   | 644914 | Uniprot                | LOC644914 martqtarkStgkaprkla   |
| IP100219038 | 15   | 12   | unsp+PKC-> PKG+PKA                                | unsp+PKC-> PKC+PKG                                | 644914 | Uniprot                | LOC644914 artqtarkStgkaprkla    |
| IP100219038 | 24   | 23   |                                                   | PKC-> PKC+DNAPK                                   | 644914 | Uniprot                | LOC644914 gkgaprklaTkaarksapst  |
| IP100219038 | 28   | 32   | unsp+CKI+PKC-> unsp+CKI                           |                                                   | 644914 | PHOsphoELM PhosphoSite | LOC644914 atkaarksapstgvgkphry  |
| IP100219038 | 37   | 32   | unsp+CKI+PKC-> unsp+CKI                           |                                                   | 644914 | PHOsphoELM PhosphoSite | LOC644914 atkaarksapstgvgkphry  |
| IP100219038 | 57   | 58   | unsp->                                            | unsp->                                            | 644914 | Uniprot                | LOC644914 alreirryqkStellirklpf |
| IP100219068 | 233  | 236  | unsp->                                            | unsp->                                            | 122830 | MAA30                  | dimrifktdiSepysivtryv           |
| IP100219072 | 296  | 428  | -> EGFR                                           | -> EGFR                                           | 6794   | STK11                  | lsdlkgmleYekaprfisrq            |
| IP100219072 | 311  | 307  | unsp+PKC-> unsp+PKA+RSK                           | unsp+PKC-> unsp+PKC+RSK                           | 6794   | STK11                  | rfisrqirghSwfrkhhpbpe           |
| IP100219072 | 416  | 419  | PKC->                                             |                                                   | 6794   | STK11                  | rapnparkasSasskirrlsa           |
| IP100219072 | 416  | 421  | unsp->                                            |                                                   | 6794   | STK11                  | pnnparkasSasskirrlsa            |
| IP100219072 | 416  | 422  | unsp+PKC-> unsp+PKC+cdc2                          | unsp+PKC-> unsp+PKC+cdc2                          | 6794   | STK11                  | pnnparkasSasskirrlsa            |
| IP100219072 | 423  | 419  | PKC->                                             | PKC-> unsp                                        | 6794   | STK11                  | pnnparkasSasskirrlsa            |
| IP100219072 | 423  | 421  | unsp->                                            | unsp->                                            | 6794   | STK11                  | pnnparkasSasskirrlsa            |
| IP100219072 | 423  | 422  | unsp+PKC-> PKC                                    | unsp+PKC-> unsp+PKC+DNAPK                         | 6794   | STK11                  | pnnparkasSasskirrlsa            |
| IP100219072 | 423  | 428  |                                                   | unsp+PKC+PKG+PKA+RSK-> unsp+PKG+PKA+RSK           | 6794   | STK11                  | pnnparkasSasskirrlsa            |
| IP100219072 | 431  | 422  | unsp+PKC-> unsp+PKC+cdc2                          |                                                   | 6794   | STK11                  | pnnparkasSasskirrlsa            |
| IP100219072 | 431  | 428  | unsp+PKC+PKG+PKA+RSK-> unsp+PKG+PKA+RSK           | unsp+PKC+PKG+PKA+RSK-> unsp+PKG+PKA+RSK           | 6794   | STK11                  | pnnparkasSasskirrlsa            |
| IP100219077 | 73   | 74   | unsp->                                            | unsp->                                            | 6794   | STK11                  | pnnparkasSasskirrlsa            |
| IP100219077 | 414  | 419  | unsp+PKA-> CKI                                    | unsp+PKA->                                        | 4048   | LTAAH                  | kvvinygqevYalgerqsyqf           |
| IP100219077 | 573  | 568  | PKC-> PKG                                         |                                                   | 4048   | LTAAH                  | kayvefyskSittddwkdfl            |
| IP100219078 | 464  | 463  |                                                   | unsp+PKA-> unsp                                   | 4048   | LTAAH                  | mateqgrmkfTrpfldlaaf            |
| IP100219097 | 12   | 14   | unsp+PKG+PKA->                                    | unsp+PKG+PKA-> unsp                               | 488    | ATP2A2                 | nvfdtelgSkieranacs              |
| IP100219097 | 12   | 16   | unsp->                                            | unsp->                                            | 3148   | HMBG2                  | gdpnkprgkmSsyaffvtqtr           |
| IP100219097 | 30   | 35   | unsp+PKC->                                        | unsp+PKC->                                        | 3148   | HMBG2                  | pnkprgkmssYafvtqtr              |
| IP100219097 | 43   | 42   | unsp+PKC-> unsp+CKI+PKC                           | unsp+PKC-> cdc2                                   | 3148   | HMBG2                  | eehkkkhpdsSvvnfaefskcc          |
| IP100219097 | 44   | 35   | unsp+PKC-> unsp+PKC+cdc2                          | unsp+PKC-> ATM+unsp+PKC+DNAPK                     | 3148   | HMBG2                  | pdssvnfaefSkkcserrwtm           |
| IP100219097 | 44   | 42   | unsp+PKC->                                        | unsp+PKC->                                        | 3148   | HMBG2                  | eehkkkhpdsSvvnfaefskcc          |
| IP100219097 | 59   | 58   | unsp+CKII-> unsp+PKA                              |                                                   | 3148   | HMBG2                  | pdssvnfaefSkkcserrwtm           |
| IP100219097 | 139  | 137  | unsp+PKC->                                        | unsp+PKC->                                        | 3148   | HMBG2                  | pdssvnfaefSkkcserrwtm           |
| IP100219097 | 157  | 155  | unsp->                                            | unsp+PKC->                                        | 3148   | HMBG2                  | pdssvnfaefSkkcserrwtm           |
| IP100219097 | 173  | 168  |                                                   | unsp->                                            | 3148   | HMBG2                  | pdssvnfaefSkkcserrwtm           |
| IP100219097 | 182  | 181  |                                                   | unsp+PKC-> ATM+unsp+PKC+DNAPK                     | 3148   | HMBG2                  | pdssvnfaefSkkcserrwtm           |
| IP100219155 | 93   | 86   | cdc2->                                            | unsp+cdc2+PKA-> unsp+PKA                          | 3148   | HMBG2                  | pdssvnfaefSkkcserrwtm           |
| IP100219155 | 98   | 94   |                                                   |                                                   | 3148   | HMBG2                  | pdssvnfaefSkkcserrwtm           |
| IP100219155 | 128  | 124  | unsp+PKC-> unsp                                   |                                                   | 3148   | HMBG2                  | pdssvnfaefSkkcserrwtm           |
| IP100219160 | 36   | 44   | unsp-> unsp+cdc2                                  |                                                   | 3148   | HMBG2                  | pdssvnfaefSkkcserrwtm           |
| IP100219160 | 37   | 44   | unsp-> unsp+cdc2                                  |                                                   | 3148   | HMBG2                  | pdssvnfaefSkkcserrwtm           |
| IP100219179 | 289  | 293  | PKC->                                             |                                                   | 3148   | HMBG2                  | pdssvnfaefSkkcserrwtm           |
| IP100219217 | 82   | 85   | unsp+PKC->                                        | unsp+PKC-> PKC                                    | 3148   | HMBG2                  | pdssvnfaefSkkcserrwtm           |
| IP100219217 | 318  | 320  | PKG->                                             | PKG->                                             | 3148   | HMBG2                  | pdssvnfaefSkkcserrwtm           |
| IP100219217 | 319  | 320  | PKG->                                             | PKG->                                             | 3148   | HMBG2                  | pdssvnfaefSkkcserrwtm           |
| IP100219219 | 29   | 30   | -> cdc2                                           | -> cdc2                                           | 3148   | HMBG2                  | pdssvnfaefSkkcserrwtm           |
| IP100219299 | 1543 | 1544 | unsp-> unsp+PKC                                   | unsp-> unsp+PKC                                   | 3148   | HMBG2                  | pdssvnfaefSkkcserrwtm           |
| IP100219306 | 114  | 113  | CKII-> CKII+DNAPK                                 | CKII-> CKII+DNAPK                                 | 3148   | HMBG2                  | pdssvnfaefSkkcserrwtm           |
| IP100219365 | 79   | 74   | unsp+PKA+p38MAPK+RSK-> unsp+PKA+p38MAPK           |                                                   | 3148   | HMBG2                  | pdssvnfaefSkkcserrwtm           |
| IP100219365 | 139  | 144  | PKA->                                             |                                                   | 3148   | HMBG2                  | pdssvnfaefSkkcserrwtm           |
| IP100219365 | 209  | 207  | unsp+PKC+cdc2-> cdc2                              | unsp+PKC+cdc2-> cdc2                              | 3148   | HMBG2                  | pdssvnfaefSkkcserrwtm           |
| IP100219365 | 209  | 214  | unsp+PKA-> PKA                                    | unsp+PKA-> PKA                                    | 3148   | HMBG2                  | pdssvnfaefSkkcserrwtm           |
| IP100219365 | 211  | 205  |                                                   | INSR->                                            | 3148   | HMBG2                  | pdssvnfaefSkkcserrwtm           |
| IP100219365 | 211  | 207  | unsp+PKC+cdc2-> unsp                              |                                                   | 3148   | HMBG2                  | pdssvnfaefSkkcserrwtm           |
| IP100219365 | 211  | 214  | unsp+PKA-> PKA                                    | unsp+PKA-> PKA                                    | 3148   | HMBG2                  | pdssvnfaefSkkcserrwtm           |
| IP100219365 | 254  | 249  | unsp+RSK-> unsp                                   | unsp+RSK-> unsp                                   | 3148   | HMBG2                  | pdssvnfaefSkkcserrwtm           |
| IP100219365 | 388  | 384  | unsp+PKG+PKB+CKII+PKA+RSK-> unsp+PKB+CKII+PKA+RSK | unsp+PKG+PKB+CKII+PKA+RSK-> unsp+PKB+CKII+PKA+RSK | 3148   | HMBG2                  | pdssvnfaefSkkcserrwtm           |
| IP100219368 | 343  | 339  | PKC-> unsp                                        | PKC-> unsp                                        | 3148   | HMBG2                  | pdssvnfaefSkkcserrwtm           |
| IP100219381 | 64   | 59   | -> PKA                                            |                                                   | 3148   | HMBG2                  | pdssvnfaefSkkcserrwtm           |
| IP100219383 | 23   | 19   | unsp->                                            | unsp->                                            | 3148   | HMBG2                  | pdssvnfaefSkkcserrwtm           |
| IP100219420 | 105  | 109  | unsp->                                            | unsp->                                            | 3148   | HMBG2                  | pdssvnfaefSkkcserrwtm           |
| IP100219420 | 106  | 109  | unsp->                                            | unsp->                                            | 3148   | HMBG2                  | pdssvnfaefSkkcserrwtm           |
| IP100219420 | 114  | 117  |                                                   | -> PKC                                            | 3148   | HMBG2                  | pdssvnfaefSkkcserrwtm           |
| IP100219420 | 140  | 131  | unsp+cdc2-> unsp+PKA+cdc2                         | unsp+cdc2-> unsp+PKA+cdc2                         | 3148   | HMBG2                  | pdssvnfaefSkkcserrwtm           |
| IP100219420 | 140  | 133  | -> cdc2                                           |                                                   | 3148   | HMBG2                  | pdssvnfaefSkkcserrwtm           |
| IP100219420 | 140  | 136  | INSR+unsp-> INSR                                  |                                                   | 3148   | HMBG2                  | pdssvnfaefSkkcserrwtm           |
| IP100219420 | 140  | 137  |                                                   | INSR+unsp-> INSR+unsp+EGFR                        | 3148   | HMBG2                  | pdssvnfaefSkkcserrwtm           |
| IP100219420 | 1190 | 1187 |                                                   | -> EGFR                                           | 3148   | HMBG2                  | pdssvnfaefSkkcserrwtm           |
| IP100219445 | 208  | 204  | PKC-> unsp                                        | PKC-> unsp+PKC                                    | 3148   | HMBG2                  | pdssvnfaefSkkcserrwtm           |
| IP100219497 | 601  | 602  | unsp-> SRC                                        | unsp->                                            | 3148   | HMBG2                  | pdssvnfaefSkkcserrwtm           |
| IP100219525 | 38   | 37   | unsp-> unsp+PKA                                   | unsp-> unsp+DNAPK                                 | 3148   | HMBG2                  | pdssvnfaefSkkcserrwtm           |
| IP100219525 | 59   | 50   |                                                   | unsp+cdc2-> unsp                                  | 3148   | HMBG2                  | pdssvnfaefSkkcserrwtm           |
| IP100219525 | 59   | 50   |                                                   | unsp+PKC->                                        | 3148   | HMBG2                  | pdssvnfaefSkkcserrwtm           |
| IP100219525 | 154  | 155  | unsp+PKC-> CKII                                   | -> unsp                                           | 3148   | HMBG2                  | pdssvnfaefSkkcserrwtm           |
| IP100219532 | 100  | 94   |                                                   | PKA+RSK-> PKA                                     | 3148   | HMBG2                  | pdssvnfaefSkkcserrwtm           |
| IP100219532 | 100  | 95   | unsp+PKC+cdc2-> unsp+cdc2                         | unsp+PKC+cdc2-> unsp+cdc2                         | 3148   | HMBG2                  | pdssvnfaefSkkcserrwtm           |
| IP100219532 | 100  | 96   | unsp+PKC+cdc2+CKII-> unsp+CKII                    |                                                   | 3148   | HMBG2                  | pdssvnfaefSkkcserrwtm           |
| IP100219532 | 105  | 96   |                                                   | unsp+PKC+cdc2+CKII-> unsp+PKC+CKII                | 3148   | HMBG2                  | pdssvnfaefSkkcserrwtm           |
| IP100219532 | 105  | 109  | unsp+PKC->                                        | unsp+PKC-> unsp+PKC+cdc2                          | 3148   | HMBG2                  | pdssvnfaefSkkcserrwtm           |
| IP100219532 | 674  | 678  | unsp+PKB+PKA+RSK-> PKA+RSK                        |                                                   | 3148   | HMBG2                  | pdssvnfaefSkkcserrwtm           |
| IP100219563 | 972  | 969  | unsp+cdc2-> unsp                                  | unsp+cdc2-> unsp                                  | 3148   | HMBG2                  | pdssvnfaefSkkcserrwtm           |
| IP100219563 | 976  | 969  | unsp+cdc2-> unsp                                  | unsp+cdc2-> unsp                                  | 3148   | HMBG2                  | pdssvnfaefSkkcserrwtm           |
| IP100219563 | 976  | 974  | unsp+PKC+cdc2-> unsp+cdc2                         | unsp+PKC+cdc2-> unsp+cdc2                         | 3148   | HMBG2                  | pdssvnfaefSkkcserrwtm           |
| IP100219563 | 976  | 978  | unsp+PKC-> unsp                                   | unsp+PKC-> unsp                                   | 3148   | HMBG2                  | pdssvnfaefSkkcserrwtm           |
| IP100219568 | 91   | 87   | cdc2->                                            |                                                   | 3148   | HMBG2                  | pdssvnfaefSkkcserrwtm           |
| IP100219568 | 156  | 153  | unsp+PKA+RSK+DNAPK-> PKA+DNAPK                    | unsp+PKA+RSK+DNAPK-> unsp+PKA+DNAPK               | 3148   | HMBG2                  | pdssvnfaefSkkcserrwtm           |
| IP100219568 | 156  | 155  |                                                   | -> ATM+DNAPK                                      | 3148   | HMBG2                  | pdssvnfaefSkkcserrwtm           |
| IP100219575 | 391  | 390  | unsp+PKC-> unsp                                   | unsp+PKC-> unsp                                   | 3148   | HMBG2                  | pdssvnfaefSkkcserrwtm           |
| IP100219622 | 70   | 61   | -> cdc2                                           |                                                   | 3148   | HMBG2                  | pdssvnfaefSkkcserrwtm           |
| IP100219678 | 141  | 142  | INSR+unsp-> unsp                                  |                                                   | 3148   | HMBG2                  | pdssvnfaefSkkcserrwtm           |
| IP100219691 | 180  | 178  | SRC+unsp-> SRC                                    |                                                   | 3148   | HMBG2                  | pdssvnfaefSkkcserrwtm           |
| IP100219691 | 225  | 222  | unsp+PKC->                                        |                                                   | 3148   | HMBG2                  | pdssvnfaefSkkcserrwtm           |
| IP100219691 | 225  | 228  | -> cdc2                                           | -> cdc2                                           | 3148   | HMBG2                  | pdssvnfaefSkkcserrwtm           |
| IP100219691 | 226  | 222  | unsp+PKC-> unsp                                   | unsp+PKC->                                        | 3148   | HMBG2                  | pdssvnfaefSkkcserrwtm           |
| IP100219691 | 226  | 228  | -> CKI                                            | -> CKI                                            | 3148   | HMBG2                  | pdssvnfaefSkkcserrwtm           |
| IP100219695 | 38   | 32   | INSR->                                            | INSR->                                            | 3148   | HMBG2                  | pdssvnfaefSkkcserrwtm           |
| IP100219695 | 312  | 310  | PKC->                                             | PKC->                                             | 3148   | HMBG2                  | pdssvnfaefSkkcserrwtm           |
| IP100219729 | 73   | 70   | PKC+cdc2-> cdc2                                   |                                                   | 3148   | HMBG2                  | pdssvnfaefSkkcserrwtm           |
| IP100219757 | 128  | 135  | DNAPK-> ATM+DNAPK                                 |                                                   | 3148   | HMBG2                  | pdssvnfaefSkkcserrwtm           |
| IP100219757 | 191  | 196  |                                                   | -> p38MAPK                                        | 3148   | HMBG2                  | pdssvnfaefSkkcserrwtm           |
| IP100219894 | 22   | 24   | -> PKC                                            |                                                   | 3148   | HMBG2                  | pdssvnfaefSkkcserrwtm           |
| IP100219913 | 291  | 288  | PKC->                                             | PKC->                                             | 3148   | HMBG2                  | pdssvnfaefSkkcserrwtm           |
| IP100219913 | 291  | 299  | -> cdc2                                           | -> cdc2                                           | 3148   | HMBG2                  | pdssvnfaefSkkcserrwtm           |
| IP100219913 | 313  | 304  | -> cdc2                                           |                                                   | 3148   | HMBG2                  | pdssvnfaefSkkcserrwtm           |
| IP100219913 | 313  | 311  | unsp->                                            |                                                   | 3148   | HMBG2                  | pdssvnfaefSkkcserrwtm           |
| IP100219913 | 313  | 318  | unsp+PKG+PKA-> PKG                                | unsp+PKG+PKA-> PKG                                | 3148   | HMBG2                  | pdssvnfaefSkkcserrwtm           |
| IP100219913 | 449  | 456  | unsp+CKII-> unsp+cdc2+CKII                        | unsp+CKII-> unsp+cdc2+CKII                        | 3148   | HMBG2                  | pdssvnfaefSkkcserrwtm           |
| IP100219919 | 28   | 24   | PKC->                                             | PKC->                                             | 3148   | HMBG2                  | pdssvnfaefSkkcserrwtm           |
| IP100219919 | 28   | 26   | unsp+PKC-> unsp                                   | unsp+PKC-> unsp                                   | 3148   | HMBG2                  | pdssvnfaefSkkcserrwtm           |
| IP100219919 | 35   | 38   | unsp+PKC+PKA-> unsp+PKC+PKG                       | unsp+PKC+PKA-> unsp+PKC+PKG                       | 3148   | HMBG2                  | pdssvnfaefSkkcserrwtm           |
| IP100219919 | 36   | 38   | unsp+PKC+PKA-> unsp+PKC                           | unsp+PKC+PKA-> unsp+PKC                           | 3148   | HMBG2                  | pdssvnfaefSkkcserrwtm           |
| IP100219919 | 36   | 41   | unsp+PKA-> unsp                                   |                                                   | 3148   | HMBG2                  | pdssvnfaefSkkcserrwtm           |
| IP100219919 | 37   | 41   |                                                   | unsp+PKA-> unsp                                   | 3148   | HMBG2                  | pdssvnfaefSkkcserrwtm           |
| IP100219919 | 37   | 42   | unsp+PKA-> unsp                                   |                                                   | 3148   | HMBG2                  | pdssvnfaefSkkcserrwtm           |
| IP100219953 | 87   | 79   |                                                   | unsp+DNAPK-> ATM+unsp+DNAPK                       | 3148   | HMBG2                  | pdssvnfaefSkkcserrwtm           |
| IP100220014 | 233  | 230  | unsp->                                            | unsp->                                            | 3148   | HMBG2                  | pdssvnfaefSkkcserrwtm           |

Table S3

|             |      |      |                                                |        |           |                        |
|-------------|------|------|------------------------------------------------|--------|-----------|------------------------|
| IP100220014 | 233  | 232  | unsp+CKII->ATM+unsp+CKII+DNAPK                 | 3422   | ID11      | pneiksyvynSkeelkelkk   |
| IP100220219 | 318  | 320  | unsp->                                         | 9276   | COPB2     | angikiwakhSevqqanikam  |
| IP100220289 | 186  | 181  | unsp+PKC+RSK->unsp+PKC+PKG                     | 84181  | CHD6      | sctdsaarKsRkaskeegpt   |
| IP100220289 | 186  | 185  | unsp+PKG+PKA+RSK->unsp+CKI+PKA+RSK             | 84181  | CHD6      | saartksrkaSkeegptpvk   |
| IP100220301 | 209  | 208  | unsp+PKG+PKA+RSK->unsp+CKI+PKA+RSK             | 9588   | PRDX6     | akkilpkgyvTskksgkyl    |
| IP100220360 | 8    | 6    | unsp+PKC->                                     | 6630   | SNRPN     | -----mtvgkS5kmlghdyr   |
| IP100220360 | 8    | 7    | unsp+PKC+PKA->PKA                              | 6638   | SNRPN     | -----mtvgkS5kmlghdyr   |
| IP100220360 | 32   | 30   | unsp+PKC->PKC                                  | 6638   | SNRPN     | ilqdgfrngTfkafdkhnmI   |
| IP100220362 | 56   | 51   | PKC->                                          | 3336   | HSPE1     | vlqatvvavgSgskgkgeiq   |
| IP100220362 | 56   | 53   | unsp+CKI+PKC->CKI                              | 3336   | HSPE1     | qatvvavvgSgskgkgeiapv  |
| IP100220362 | 99   | 100  | unsp->                                         | 3336   | HSPE1     | lfrdgdlglgYvd-----     |
| IP100220373 | 425  | 433  | ->INSR                                         | 3416   | IDE       | rfdkerprgYtskiagihly   |
| IP100220403 | 6    | 5    | ->DNAPK                                        | 3018   | HIST1H2BB | -----mpepSksapapkgks   |
| IP100220403 | 6    | 7    | unsp->                                         | 3018   | HIST1H2BB | -----mpepSksapapkgksgk |
| IP100220403 | 12   | 7    | unsp->                                         | 3018   | HIST1H2BB | -----mpepSksapapkgksgk |
| IP100220403 | 16   | 15   | unsp+PKC->unsp+PKC+PKA                         | 3018   | HIST1H2BB | sksapapkgkSkkaitkaqkk  |
| IP100220403 | 17   | 15   | unsp+PKC->PKC                                  | 3018   | HIST1H2BB | sksapapkgkSkkaitkaqkk  |
| IP100220403 | 47   | 53   | unsp+PKC->PKC                                  | 3018   | HIST1H2BB | ykvlqavhpdTjsskamgim   |
| IP100220403 | 109  | 113  | unsp->                                         | 3018   | HIST1H2BB | lpgelakhavSegtkavtkyt  |
| IP100220403 | 121  | 120  | ->ATM+DNAPK                                    | 3018   | HIST1H2BB | havsegtkavTKytsk----   |
| IP100220403 | 121  | 123  | PKC->                                          | 3018   | HIST1H2BB | segtkavtkyTssk-----    |
| IP100220416 | 12   | 8    | ->unsp                                         | 7381   | UQCRB     | -----magkavSagkwldgir  |
| IP100220416 | 12   | 10   | unsp->                                         | 7381   | UQCRB     | -----magkavSagkwldgir  |
| IP100220477 | 136  | 135  | PKG+PKA->PKA                                   | 10445  | MCRS1     | apgtlkrvKsKqplqvtdkl   |
| IP100220484 | 82   | 76   | unsp+PKC->unsp+PKC+PKA                         | 10473  | HMGNA     | gnnpaknrdaStlqsgdaekt  |
| IP100220484 | 82   | 80   | unsp+PKC->PKC                                  | 10473  | HMGNA     | aknrdaStlqsgdaekt      |
| IP100220484 | 82   | 86   | unsp+PKC->CKII                                 | 10473  | HMGNA     | stlqsgkaegTgdak-----   |
| IP100220486 | 418  | 419  | unsp+PKC->unsp+PKC+CKII                        | 10474  | TADA3     | tkkekdaqawTKeresikl    |
| IP100220487 | 95   | 100  | unsp+CKII->CKII                                | 10476  | ATP5H     | vdadeekdvKscaevvslska  |
| IP100220487 | 148  | 143  | PKC->                                          | 10476  | ATP5H     | iedineafpeTlddkkypvyp  |
| IP100220487 | 149  | 150  | unsp->                                         | 10476  | ATP5H     | fpeidkdkkYpywpqhpidg   |
| IP100220642 | 120  | 115  | unsp+CKII+DNAPK->unsp+DNAPK                    | 7532   | YWHA6     | dnylincseTYeyskfylyk   |
| IP100220642 | 120  | 119  | ->DNAPK                                        | 7532   | YWHA6     | ikncsetqySkvfylylkmkgd |
| IP100220642 | 120  | 123  | unsp->                                         | 7532   | YWHA6     | setqySkvfylylkmkgdyry  |
| IP100220656 | 295  | 301  | ->CKI                                          | 10693  | CT6B      | vinqgldpTSlslakhgiv    |
| IP100220710 | 103  | 104  | unsp->                                         | 23597  | ACOT9     | lgsepelrekYltvntvrfg   |
| IP100220710 | 250  | 244  | unsp->unsp+PKA                                 | 23597  | ACOT9     | elnkgriaTstallkmap     |
| IP100220710 | 250  | 245  | PKC->PKA                                       | 23597  | ACOT9     | lnkgriaTstallkmap      |
| IP100220710 | 250  | 254  | unsp->unsp+CKII                                | 23597  | ACOT9     | ststllkmapSeaerthiem   |
| IP100220710 | 407  | 408  | unsp->unsp+PKC                                 | 23597  | ACOT9     | ekspvtpKTYegemlyldg    |
| IP100220710 | 407  | 412  | PKA->                                          | 23597  | ACOT9     | plvfkpygS5kmlghdyr     |
| IP100220827 | 15   | 12   | PKC->CKII                                      | 9168   | TMSB10    | adkpdmgelaSfdakalkkte  |
| IP100220827 | 17   | 21   | PKC->                                          | 9168   | TMSB10    | asfdakalkktetqekntipt  |
| IP100220827 | 26   | 21   | PKC->                                          | 9168   | TMSB10    | asfdakalkktetqekntipt  |
| IP100220827 | 26   | 23   | PKC+DNAPK->DNAPK                               | 9168   | TMSB10    | fdakalkkteTqekntiptke  |
| IP100220827 | 26   | 28   | ->CKI                                          | 9168   | TMSB10    | lkketqeknTlptketieq    |
| IP100220827 | 39   | 41   | unsp->                                         | 9168   | TMSB10    | ktetieqkrSeis-----     |
| IP100220827 | 39   | 44   | PKA->                                          | 9168   | TMSB10    | tieqekrSeis-----       |
| IP100220828 | 17   | 16   | PKC->PKC+DNAPK                                 | 7114   | TMSB4X    | dmaeiekfSkklktetok     |
| IP100220828 | 26   | 23   | PKC+DNAPK->DNAPK                               | 7114   | TMSB4X    | fdakalkkteTqeknlpske   |
| IP100220828 | 32   | 31   | unsp->ATM+unsp+DNAPK                           | 7114   | TMSB4X    | tetqeknlpsketieqeka    |
| IP100220828 | 32   | 34   | ->unsp                                         | 7114   | TMSB4X    | qeknlpsketieqeka       |
| IP100220834 | 144  | 140  | PKC->                                          | 7520   | XRC5      | rheiftdlSfrsksqldii    |
| IP100220834 | 144  | 143  | unsp+CKI+PKA->unsp+CKI+PKA+DNAPK               | 7520   | XRC5      | eiftdlSfrsksqldiihs    |
| IP100220834 | 144  | 145  | ATM+unsp+cdc2->ATM+unsp+cdc2+DNAPK             | 7520   | XRC5      | tdlSfrsksqldiihsik     |
| IP100220834 | 155  | 153  | unsp+PKC->PKC+cdc2                             | 7520   | XRC5      | sksqldiihsikklcdslifg  |
| IP100220834 | 155  | 160  | PKA->cdc2+PKA                                  | 7520   | XRC5      | ihshkkcdSlgffpfsfg     |
| IP100220834 | 155  | 153  | unsp+PKC->PKC+PKA                              | 7520   | XRC5      | sksqldiihsikklcdslifg  |
| IP100220834 | 156  | 160  | PKA->cdc2+PKA                                  | 7520   | XRC5      | ihshkkcdSlgffpfsfg     |
| IP100220834 | 195  | 191  | ->PKA                                          | 7520   | XRC5      | qpfrrghgSpflpkitgeaq   |
| IP100220834 | 265  | 258  | unsp->unsp+cdc2                                | 7520   | XRC5      | pccrltgsnSiraiayskil   |
| IP100220834 | 332  | 333  | unsp->                                         | 7520   | XRC5      | fskvddeeqmKYsegkcfsvl  |
| IP100220834 | 338  | 335  | ->PKA                                          | 7520   | XRC5      | kvdeeqmKYsegkcfsvl     |
| IP100220834 | 338  | 341  | PKC+CKI->CKI+cdc2                              | 7520   | XRC5      | mkysgkcfsvlgfckssqv    |
| IP100220834 | 532  | 531  | unsp+PKC->ATM+unsp+PKC+DNAPK                   | 7520   | XRC5      | evtksqipSKittlfpile    |
| IP100220871 | 10   | 5    | PKC->                                          | 6167   | RPL37     | -----mtkgTSsfgrkrmkt   |
| IP100220871 | 10   | 7    | unsp+PKC->PKC+PKA                              | 6167   | RPL37     | -----mtkgTSsfgrkrmkt   |
| IP100220871 | 10   | 15   | PKG+PKA->                                      | 6167   | RPL37     | tsfgrkrmktThtlccrrcsq  |
| IP100220901 | 477  | 485  | PKA->                                          | 9882   | TBC1D4    | raklvqihlSsiltndeqadi  |
| IP100220906 | 104  | 99   | unsp+PKC->unsp+PKA                             | 10965  | ACOT2     | apeqevtrraSlrdkeqalfq  |
| IP100220994 | 12   | 11   | unsp+PKC+cdc2+PKA->cdc2+PKA                    | 55506  | H2AFY2    | msgrsgkkmSksrsaragv    |
| IP100220994 | 12   | 14   | unsp+PKA->PKC                                  | 55506  | H2AFY2    | rsqkmsklsSrsaragvifp   |
| IP100221088 | 155  | 160  | unsp+PKC->PKC                                  | 6203   | RP59      | rlidsqhidfSlrspyggrrp  |
| IP100221089 | 27   | 24   | PKC->                                          | 6207   | RP513     | salpyrsrvTwlktddvkv    |
| IP100221089 | 27   | 29   | unsp+CKII->unsp+CKI+PKC+CKII                   | 6207   | RP513     | rsalpyrsrvTwlktddvkv   |
| IP100221089 | 39   | 38   | unsp+CKII->unsp+CKI+PKC+CKII                   | 6207   | RP513     | tsldvkeqYtklkgqkqz     |
| IP100221089 | 93   | 89   | SRC+unsp->unsp                                 | 6207   | RP513     | glapldpedYthlkavavv    |
| IP100221091 | 124  | 121  | PKC+PKG+PKA->PKA                               | 6210   | RP515A    | mdheearmhTKgkigloff    |
| IP100221093 | 19   | 20   | INSR->                                         | 6218   | RP517     | kkaarviiekYytrigndfht  |
| IP100221093 | 19   | 21   | INSR+unsp->unsp                                | 6218   | RP517     | kaarviiekYytrigndfht   |
| IP100221106 | 275  | 282  | unsp+CKII->unsp+cdc2+CKII                      | 10992  | SF3B2     | alekilkqeSreemnsaqe    |
| IP100221222 | 68   | 71   | unsp->                                         | 10923  | SUB1      | dnmfagikmYvsvrdfgkv    |
| IP100221222 | 68   | 73   | unsp+PKG+RSK->unsp+PKC                         | 10923  | SUB1      | mftagikmYvsvrdfgkv     |
| IP100221226 | 63   | 61   | PKC->                                          | 309    | ANXA6     | snrqrevcsqSykslygkdl   |
| IP100221226 | 63   | 62   | INSR+unsp->INSR+EGFR                           | 309    | ANXA6     | nnrqrevcsqSykslygkdl   |
| IP100221226 | 63   | 64   | unsp->unsp+CKI                                 | 309    | ANXA6     | qrqrevcsqSykslygkdl    |
| IP100221226 | 68   | 61   | PKC->PKC+cdc2                                  | 309    | ANXA6     | snrqrevcsqSykslygkdl   |
| IP100221226 | 68   | 62   | INSR+unsp->unsp                                | 309    | ANXA6     | nnrqrevcsqSykslygkdl   |
| IP100221226 | 75   | 79   | unsp+PKC->                                     | 309    | ANXA6     | diadlkylTgkferlvi      |
| IP100221226 | 81   | 79   | unsp+PKC->CKII                                 | 309    | ANXA6     | diadlkylTgkferlvi      |
| IP100221226 | 299  | 295  | unsp+PKC->unsp                                 | 309    | ANXA6     | dmlidreirfTYekslysmi   |
| IP100221226 | 299  | 297  | INSR+unsp->unsp                                | 309    | ANXA6     | ldireirfTYekslysmi     |
| IP100221226 | 299  | 300  | CKI+PKA->CKI+PKA+DNAPK                         | 309    | ANXA6     | reirfTYekslysmi        |
| IP100221226 | 299  | 302  | unsp->                                         | 309    | ANXA6     | ifrtkyeksYSmikndtsge   |
| IP100221226 | 299  | 303  | unsp+PKC->                                     | 309    | ANXA6     | frtkyeksYSmikndtsge    |
| IP100221226 | 306  | 300  | CKI+PKA->PKA                                   | 309    | ANXA6     | reirfTYeksYSmikndtsge  |
| IP100221226 | 306  | 303  | unsp+PKC->unsp                                 | 309    | ANXA6     | frtkyeksYSmikndtsge    |
| IP100221226 | 306  | 309  | unsp+PKC+CKII->CKII                            | 309    | ANXA6     | kslysmikndTsgyektllk   |
| IP100221226 | 306  | 310  | unsp->unsp+cdc2                                | 309    | ANXA6     | kslysmikndTsgyektllk   |
| IP100221226 | 418  | 415  | PKC+CKII->CKII                                 | 309    | ANXA6     | fkshfgrdlmTdkseisgdl   |
| IP100221226 | 418  | 422  | CKII->cdc2+CKII                                | 309    | ANXA6     | dimtolkeSgdlarilgl     |
| IP100221226 | 483  | 481  | INSR+unsp+EGFR->unsp                           | 309    | ANXA6     | raimeaykedYtkledals    |
| IP100221226 | 620  | 617  | unsp+PKC->CKII                                 | 309    | ANXA6     | klyksmkagagTdekltrimv  |
| IP100221226 | 620  | 623  | PKC->                                          | 309    | ANXA6     | kgagtdetlTrimvrseld    |
| IP100221325 | 123  | 128  | GSK3+p38MAPK->p38MAPK                          | 5903   | RANBP2    | lereaikfpgSpaiykileq   |
| IP100234252 | 345  | 343  | unsp+PKC+PKG+cdc2+PKA+RSK->unsp+cdc2+PKA+RSK   | 6599   | SMARCC1   | pptptserikSgkkgaslyq   |
| IP100234252 | 345  | 350  | unsp+DNAPK->DNAPK                              | 6599   | SMARCC1   | rkksgkkggaSlygkrsaqe   |
| IP100234252 | 346  | 343  | unsp+PKC+PKG+cdc2+PKA+RSK->unsp+PKC+PKG+PKA+R  | 6599   | SMARCC1   | pptptserikSgkkgaslyq   |
| IP100234252 | 354  | 350  | unsp+DNAPK->unsp+PKA+DNAPK                     | 6599   | SMARCC1   | rkksgkkggaSlygkrsaqe   |
| IP100234252 | 354  | 357  | ATM+unsp+CKII+PKA+DNAPK->ATM+unsp+PKG+CKII+PKA | 6599   | SMARCC1   | ggaSlygkrsaqe          |
| IP100234446 | 374  | 367  | unsp+PKC->                                     | 1386   | ATF2      | ikfermYvsvrdfgkv       |
| IP100240812 | 1136 | 1139 | PKC->                                          | 23047  | PD5B      | vlgvavnpkPSagkqsqtks   |
| IP100240812 | 1136 | 1140 | PKC->                                          | 23047  | PD5B      | vlgvavnpkPSagkqsqtks   |
| IP100245135 | 264  | 262  | INSR+unsp+EGFR->unsp+EGFR                      | 79621  | RNA5E2B   | sedpeveakedYtkntdklt   |
| IP100245135 | 295  | 292  | unsp+PKC->unsp                                 | 79621  | RNA5E2B   | aqkalakvdkSgmksidftf   |
| IP100245135 | 295  | 296  | unsp+PKC->unsp                                 | 79621  | RNA5E2B   | lakvdkSgmksidftf       |
| IP100245135 | 295  | 299  | unsp+CKI+PKC->CKI                              | 79621  | RNA5E2B   | vdksmksidftf           |
| IP100246058 | 48   | 47   | unsp+PKC+CKII->unsp+CKII                       | 10015  | POCD6IP   | rkksgkkggaSlygkrsaqe   |
| IP100246188 | 47   | 43   | unsp+PKC+CKII->unsp+CKII                       | 342541 | LOC342541 | aktaeafpalStegkgyfysk  |
| IP100246188 | 47   | 44   | PKC->                                          | 342541 | LOC342541 | aktaeafpalStegkgyfysk  |
| IP100246188 | 47   | 51   | unsp->                                         | 342541 | LOC342541 | alstgekgfYKsscfhriip   |
| IP100250153 | 116  | 115  | unsp->unsp+DNAPK                               | 51087  | YBX2      | ngyfinrmdTkedvfhvhta   |
| IP100255316 | 6    | 2    | PKC->                                          | 3013   | HIST1H2AD | -----mSgrgkqgkgr       |
| IP100256605 | 302  | 297  | unsp+PKC->PKC                                  | 51322  | WAC       | tslklptptSpvapakteke   |
| IP100257882 | 493  | 490  | PKC->                                          | 5184   | PEPD      | agcdkaftpfSgpk-----    |
| IP100289034 | 397  | 390  | unsp+cdk5->unsp+cdk5+p38MAPK                   | 84444  | DOT1L     | kagaatvkvpSpakarkklkn  |
| IP100289159 | 311  | 308  | ->EGFR                                         | 2744   | GLS       | ndlgttyvhrYvgepkslfr   |
| IP100289271 | 828  | 832  | PKC->                                          | 8499   | PFFIA2    | hkapkkgkikSsigrfgykke  |

Table S3

|             |      |      |                                           |                                           |        |           |                        |
|-------------|------|------|-------------------------------------------|-------------------------------------------|--------|-----------|------------------------|
| IP100289271 | 828  | 833  | unsp+PKA->                                | unsp+PKA->PKA                             | 8499   | PFPIA2    | kapkkkgiksSigrtfkgkke  |
| IP100289271 | 831  | 833  | unsp+PKA->PKC                             | unsp+PKA->unsp                            | 8499   | PFPIA2    | kapkkkgiksSigrtfkgkke  |
| IP100289334 | 2170 | 2168 | unsp+PKC->PKC                             | unsp+PKC->PKC                             | 2317   | FLNB      | vpqemvhtvSVkyrgahvtg   |
| IP100289334 | 2524 | 2523 | PKC->PKC+PKA                              | PKC->DNAPK                                | 2317   | FLNB      | skvtskgagISkafvgksfs   |
| IP100289334 | 2524 | 2531 | ->PKA                                     | ->PKA                                     | 2317   | FLNB      | glakafvgkSsfhvksgag    |
| IP100289334 | 2576 | 2572 | PKC->                                     | PKC->                                     | 2317   | FLNB      | khvngnrvnTyvkvsgdyv    |
| IP100289344 | 1412 | 1408 | PKC->                                     | PKC->                                     | 9611   | NCOR1     | aikhvksliTgpsklrgrmp   |
| IP100289344 | 1412 | 1411 | PKC->                                     | PKC->                                     | 9611   | NCOR1     | hnvkslitgpSklsrgmnp    |
| IP100289344 | 1412 | 1414 | unsp+PKA->unsp+PKC                        | unsp+PKA->unsp                            | 9611   | NCOR1     | kslitgpsklSrgmpleivp   |
| IP100289499 | 199  | 190  | unsp+CKII->unsp+cdc2+CKII                 |                                           | 471    | ATIC      | thtaqydeaiSdyfrkyskg   |
| IP100289499 | 199  | 192  | INSR->                                    | INSR->                                    | 471    | ATIC      | taqydeaisDyfrkyskgs    |
| IP100289499 | 199  | 198  | PKC->PKA                                  | PKC->ATM+DNAPK                            | 471    | ATIC      | aisdyfrkySkvgvsqmplry  |
| IP100289499 | 199  | 202  | unsp->ATM                                 | unsp->ATM                                 | 471    | ATIC      | yfrkySkvgSqmplrygmnp   |
| IP100289499 | 356  | 352  | PKC->                                     | PKC->                                     | 471    | ATIC      | ipgyeeaaITliskkkngny   |
| IP100289499 | 356  | 355  | PKC->                                     | PKC->unsp+ATM+PKC+DNAPK                   | 471    | ATIC      | gyeeaaITliskkkngny     |
| IP100289499 | 357  | 352  | PKC->                                     | PKC->                                     | 471    | ATIC      | ipgyeeaaITliskkkngny   |
| IP100289524 | 246  | 251  | PKG+PKA+p38MAPK->p38MAPK                  |                                           | 1109   | AKR1C4    | lcalakhhkrTpalialryql  |
| IP100289524 | 270  | 271  | unsp->unsp+CKII                           | unsp->unsp+CKII                           | 1109   | AKR1C4    | lgrvvvlakSyneqireni    |
| IP100289524 | 270  | 272  | ->EGFR                                    | ->EGFR                                    | 1109   | AKR1C4    | qrgvvvlaksYneqireniq   |
| IP100289601 | 169  | 162  | INSR+unsp->unsp                           | INSR+unsp->unsp                           | 3066   | HDAC2     | hkataeemtKYhsdeyikfr   |
| IP100289601 | 169  | 167  | unsp+EGFR->unsp                           |                                           | 3066   | HDAC2     | emtmtyhsdeYikfrsirpd   |
| IP100289601 | 169  | 173  | unsp+PKC->                                |                                           | 3066   | HDAC2     | hsdeyikfrSirpdmseys    |
| IP100289601 | 184  | 183  | unsp+PKC->                                | ->DNAPK                                   | 3066   | HDAC2     | sirpdmseysSkmpfrnvge   |
| IP100289746 | 256  | 262  | unsp+PKC->unsp+CKI+PKC                    |                                           | 1058   | PAK1      | eilekrsivSvagdppkkytr  |
| IP100289773 | 265  | 257  | unsp+PKC->unsp+CKI+PKC                    |                                           | 1051   | CEBPB     | acagaapaSpQvkskaktv    |
| IP100289773 | 265  | 266  | unsp+PKC->unsp+CKI+PKC                    | unsp+PKC->unsp+PKC                        | 1051   | CEBPB     | psqvkskaktVdvhksdeyik  |
| IP100289807 | 402  | 399  | unsp+PKA->PKA                             |                                           | 1051   | CEBPB     | psqvkskaktVdvhksdeyik  |
| IP100289807 | 402  | 400  | unsp+PKC+CKII->unsp+CKII                  | unsp+PKC+CKII->unsp+CKII                  | 51095  | TRMT1     | sghdirkvgISgkeigallq   |
| IP100289819 | 2352 | 2353 | INSR->                                    |                                           | 51095  | TRMT1     | ghdirkgvISgkeigallq    |
| IP100289819 | 2352 | 2354 | ->PKC                                     |                                           | 3482   | IGF2R     | crssrvsvyKyskvnkeetde  |
| IP100289866 | 262  | 261  | PKC+cdc2->                                | PKC+cdc2->ATM+cdc2+DNAPK                  | 3482   | IGF2R     | rrssrvsvyKyskvnkeetde  |
| IP100289866 | 265  | 261  | PKC+cdc2->                                | PKC+cdc2->cdc2                            | 2308   | FOXO1     | rrraasmdmnSfkakrsraa   |
| IP100290204 | 118  | 115  | unsp->                                    | unsp->                                    | 2308   | FOXO1     | rrraasmdmnSfkakrsraa   |
| IP100290204 | 118  | 117  | PKC->                                     | PKC->DNAPK                                | 6625   | SNRNP70   | lfvarvnydtTesklrrefev  |
| IP100290204 | 162  | 159  | unsp->                                    |                                           | 6625   | SNRNP70   | varvnydtTesklrrefev    |
| IP100290204 | 162  | 161  | unsp->                                    | ->EGFR                                    | 6625   | SNRNP70   | ieyehrdmhSaykhadgkki   |
| IP100290314 | 633  | 631  | unsp->                                    |                                           | 6625   | SNRNP70   | yeherdmhsaYkhadgkidd   |
| IP100290416 | 216  | 222  | ->cdc2                                    |                                           | 56897  | WRNIP1    | aptrlmkdlgygkykynpmy   |
| IP100290548 | 119  | 117  | unsp+cdk5+p38MAPK->cdk5+p38MAPK           | ->cdc2                                    | 29789  | OLA1      | evlnkhfITSkpmvylvnls   |
| IP100290548 | 119  | 120  | unsp+cdk5+p38MAPK->unsp+PKC+cdk5+p38MAPK  | unsp+cdk5+p38MAPK->GSK3+cdk5+p38MAPK      | 1870   | E2F2      | gkcrivrdgISpdktpsgpek  |
| IP100290548 | 119  | 123  | unsp+GSK3+p38MAPK->unsp+GSK3              | unsp+cdk5+p38MAPK->unsp+PKC+cdk5+p38MAPK  | 1870   | E2F2      | irvdgISpdktpsgpektryd  |
| IP100290548 | 122  | 120  | unsp+GSK3+p38MAPK->unsp+GSK3              | unsp+cdk5+p38MAPK->unsp+GSK3+cdk5+p38MAPK | 1870   | E2F2      | irvdgISpdktpsgpektryd  |
| IP100290548 | 127  | 123  | unsp+GSK3+p38MAPK->unsp+GSK3+cdk5+p38MAPK |                                           | 1870   | E2F2      | irvdgISpdktpsgpektryd  |
| IP100290548 | 127  | 130  | INSR+unsp->unsp                           | INSR+unsp->unsp                           | 1870   | E2F2      | irvdgISpdktpsgpektryd  |
| IP100290548 | 127  | 132  | unsp+PKA->unsp                            | unsp+PKA->unsp                            | 1870   | E2F2      | irvdgISpdktpsgpektryd  |
| IP100290566 | 199  | 204  | ATM+unsp+PKG+PKA->ATM+unsp                |                                           | 6950   | TCP1      | svnlkahgrSqmesmlsigy   |
| IP100290652 | 1050 | 1053 | unsp->                                    | unsp->                                    | 51773  | RSF1      | ggvgvrgkdiStitghrgkdi  |
| IP100290652 | 1061 | 1064 | unsp+CKII->CKII                           | unsp+CKII->CKII                           | 51773  | RSF1      | ttghrgkdiStitghrgkdi   |
| IP100290652 | 1339 | 1336 | unsp+PKC->unsp                            | unsp+PKC->unsp                            | 1773   | RSF1      | qprvlpsaeSkpkyriesed   |
| IP100290652 | 1339 | 1337 | unsp+PKC->                                | unsp+PKC->                                | 51773  | RSF1      | qprvlpsaeSkpkyriesed   |
| IP100290857 | 208  | 204  | PKC->                                     | PKC->                                     | 3850   | KRT3      | vkageeqikTnnkfafsid    |
| IP100291006 | 239  | 235  | unsp->                                    | unsp->                                    | 3850   | KRT3      | qiktinnkfaSfidkvrfleq  |
| IP100291006 | 296  | 289  | ->PKA                                     | ->PKA                                     | 4191   | MDH2      | altgrigeagTevvkakagag  |
| IP100291006 | 297  | 289  | ->PKA                                     | ->PKA                                     | 4191   | MDH2      | ksqetecyTfStpIlkgkkgi  |
| IP100291006 | 314  | 317  | CKII->cdc2+CKII                           | CKII->cdc2+CKII                           | 4191   | MDH2      | ksqetecyTfStpIlkgkkgi  |
| IP100291006 | 338  | 336  | unsp+PKC->                                | unsp+PKC->                                | 4191   | MDH2      | ksqetecyTfStpIlkgkkgi  |
| IP100291131 | 36   | 40   | unsp+CKII->CKII                           | unsp+PKC->                                | 4191   | MDH2      | ksqetecyTfStpIlkgkkgi  |
| IP100291136 | 121  | 115  | unsp+RSK->unsp                            | unsp+RSK->unsp                            | 4191   | MDH2      | ksqetecyTfStpIlkgkkgi  |
| IP100291136 | 121  | 116  | PKC+cdc2->PKA+cdc2                        | PKC+cdc2->cdc2                            | 4191   | MDH2      | ksqetecyTfStpIlkgkkgi  |
| IP100291419 | 262  | 261  | ->DNAPK                                   | ->DNAPK                                   | 1291   | COL6A1    | rmppggrdaIsSvdavkyfkg  |
| IP100291467 | 23   | 22   | ->DNAPK                                   | ->DNAPK                                   | 1291   | COL6A1    | rmppggrdaIsSvdavkyfkg  |
| IP100291467 | 96   | 95   | INSR+unsp->INSR+unsp+EGFR                 |                                           | 39     | ACAT2     | prhgsnieamSkikpyftdg   |
| IP100291483 | 246  | 251  | PKG+PKA+p38MAPK->p38MAPK                  |                                           | 293    | SLC25A6   | flaglgaaiSkstavapierv  |
| IP100291510 | 436  | 432  | unsp->unsp+RSK                            | unsp->unsp+PKG                            | 293    | SLC25A6   | qalnfafdkYkqilggvdsk   |
| IP100291510 | 511  | 505  | CKI->                                     | CKI->                                     | 8644   | AKR1C3    | lcalakhhkrTpalialryql  |
| IP100291608 | 64   | 63   | PKC->                                     | PKC->                                     | 3615   | IMPDH2    | khlssoqnyfSeadikvaag   |
| IP100291608 | 64   | 66   | PKC+PKG->PKC                              | PKC->                                     | 3615   | IMPDH2    | khlssoqnyfSeadikvaag   |
| IP100291608 | 64   | 69   | PKG+PKA->                                 | PKG+PKA->                                 | 57092  | PCNP      | saeeaaadlpTkpiskfgf    |
| IP100291608 | 67   | 63   | PKC->                                     | PKC->                                     | 57092  | PCNP      | saeeaaadlpTkpiskfgf    |
| IP100291608 | 67   | 69   | PKG+PKA->                                 | PKG+PKA->                                 | 57092  | PCNP      | saeeaaadlpTkpiskfgf    |
| IP100291608 | 70   | 66   | PKC+PKG->PKG                              | PKG+PKA->                                 | 57092  | PCNP      | saeeaaadlpTkpiskfgf    |
| IP100291608 | 70   | 69   | PKG+PKA->                                 | PKG+PKA->                                 | 57092  | PCNP      | saeeaaadlpTkpiskfgf    |
| IP100291608 | 70   | 77   | PKC+cdc2+DNAPK->ATM+PKC+cdc2+DNAPK        | PKG+PKA->ATM+PKG                          | 57092  | PCNP      | saeeaaadlpTkpiskfgf    |
| IP100291608 | 152  | 156  | unsp+PKC->PKC+cdc2                        | ->cdc2                                    | 57092  | PCNP      | saeeaaadlpTkpiskfgf    |
| IP100291643 | 95   | 93   | unsp+PKC->PKC+cdc2                        | unsp+PKC->PKC+cdc2                        | 283377 | SPRYD4    | ekaqepvtstSlvrgkkadne  |
| IP100291643 | 95   | 97   | ATM+PKA+DNAPK->ATM+DNAPK                  | ATM+PKA+DNAPK->ATM+DNAPK                  | 283377 | SPRYD4    | ekaqepvtstSlvrgkkadne  |
| IP100291643 | 130  | 133  | PKC->                                     | PKC->                                     | 283377 | SPRYD4    | ekaqepvtstSlvrgkkadne  |
| IP100291646 | 189  | 183  | CKII->                                    | CKII->                                    | 25902  | MTHFD1L   | lkepdvdvgYDinlgkivrg   |
| IP100291669 | 71   | 70   | ->PKA                                     | ->DNAPK                                   | 134510 | UBLCP1    | klgalklknTKimmmgtree   |
| IP100291669 | 117  | 119  | ->PKC                                     |                                           | 134510 | UBLCP1    | enreenlikiSrvkeykvei   |
| IP100291669 | 245  | 243  | unsp->                                    | unsp->                                    | 134510 | UBLCP1    | gviwgkfsefYskkntimfdd  |
| IP100291669 | 245  | 244  | unsp->ATM+unsp                            | unsp->ATM+unsp                            | 134510 | UBLCP1    | gviwgkfsefYskkntimfdd  |
| IP100291669 | 246  | 243  | unsp->                                    | unsp->                                    | 134510 | UBLCP1    | gviwgkfsefYskkntimfdd  |
| IP100291669 | 246  | 244  | unsp->                                    | unsp->                                    | 134510 | UBLCP1    | gviwgkfsefYskkntimfdd  |
| IP100291764 | 6    | 2    | PKC->                                     |                                           | 8336   | HIST1H2AM | -----mSgrgkqgkqr       |
| IP100291783 | 1363 | 1361 | unsp+PKC->CKII                            | unsp+PKC->                                | 25929  | GEMIN5    | rmistkfelfSekhaslansq  |
| IP100291800 | 486  | 489  | unsp+PKC->PKC+cdc2                        | unsp+PKC->PKC                             | 56478  | E1F4ENIF1 | gdmtafnkvlStmkasgtlps  |
| IP100291916 | 1533 | 1529 | PKC->                                     | PKC->                                     | 55023  | PHIP      | eqpstsaaKTtitananasai  |
| IP100291916 | 1533 | 1532 | PKC+cdc2->cdc2                            | PKC+cdc2->cdc2                            | 55023  | PHIP      | eqpstsaaKTtitananasai  |
| IP100291930 | 643  | 642  | unsp+EGFR->                               | ->ATM+DNAPK                               | 9685   | CLINT1    | qdafanfanfSk-----      |
| IP100291939 | 437  | 441  | unsp+PKA->PKC                             | ATM+unsp+DNAPK->ATM+unsp+CaM-II+DNAPK     | 8243   | SMC1A     | nqkrieleeYfIttsqslae   |
| IP100291939 | 713  | 715  | unsp+PKA->PKC                             | unsp+PKA->                                | 8243   | SMC1A     | shdglrmkyfSsdeidtdtr   |
| IP100292012 | 614  | 616  | unsp+PKG+PKA+RSK->PKG+PKA+RSK             | PKG->                                     | 23461  | ABCA5     | tkldnagakiSggagrklslg  |
| IP100292012 | 620  | 624  | unsp+PKG+PKA+RSK->PKG+PKA+RSK             | PKG->                                     | 23461  | ABCA5     | tkldnagakiSggagrklslg  |
| IP100292059 | 384  | 386  | PKG->PKG                                  | PKG->                                     | 9972   | NUP153    | atnrsvyfKpSltpsgferikt |
| IP100292059 | 384  | 388  | unsp+p38MAPK->unsp                        | CKI+PKG->PKG                              | 9972   | NUP153    | atnrsvyfKpSltpsgferikt |
| IP100292059 | 718  | 713  | CKI+PKG->CKI                              | CKI+PKG->PKG                              | 9972   | NUP153    | atnrsvyfKpSltpsgferikt |
| IP100292059 | 954  | 953  | CKI->CKI+PKA                              | CKI->ATM+DNAPK                            | 9972   | NUP153    | atnrsvyfKpSltpsgferikt |
| IP100292059 | 1120 | 1115 | unsp+CKI->CKI                             | unsp+CKI->                                | 9972   | NUP153    | atnrsvyfKpSltpsgferikt |
| IP100292135 | 55   | 59   | unsp+PKC->PKC                             | unsp+CKI->                                | 9972   | NUP153    | atnrsvyfKpSltpsgferikt |
| IP100292238 | 128  | 125  | unsp+PKC->unsp                            | unsp+CKI->                                | 9972   | NUP153    | atnrsvyfKpSltpsgferikt |
| IP100292537 | 441  | 438  | unsp->                                    | unsp->                                    | 9972   | NUP153    | atnrsvyfKpSltpsgferikt |
| IP100292537 | 441  | 440  | unsp->                                    | unsp->                                    | 9972   | NUP153    | atnrsvyfKpSltpsgferikt |
| IP100292537 | 442  | 435  | CKII->cdc2+CKII                           | unsp+PKC->ATM+unsp+PKC+DNAPK              | 9972   | NUP153    | atnrsvyfKpSltpsgferikt |
| IP100292537 | 442  | 438  | unsp->                                    | unsp->                                    | 9972   | NUP153    | atnrsvyfKpSltpsgferikt |
| IP100292537 | 442  | 440  | unsp+PKC->unsp                            | unsp+PKC->unsp                            | 9972   | NUP153    | atnrsvyfKpSltpsgferikt |
| IP100292746 | 249  | 251  | unsp+PKG->                                | unsp+PKG->unsp                            | 9972   | NUP153    | atnrsvyfKpSltpsgferikt |
| IP100292746 | 249  | 253  | unsp->                                    | unsp+PKG->unsp                            | 9972   | NUP153    | atnrsvyfKpSltpsgferikt |
| IP100292753 | 238  | 240  | PKC->                                     | PKC->                                     | 9972   | NUP153    | atnrsvyfKpSltpsgferikt |
| IP100292771 | 2070 | 2069 | unsp+PKC+PKA+RSK->unsp+PKC+RSK            | unsp+PKC+PKA+RSK->unsp+PKC+RSK            | 26130  | GAPVD1    | qgskfkgkSdrfrkqvem     |
| IP100292771 | 2070 | 2077 | ->p38MAPK                                 | unsp+PKC+PKA+RSK->PKA+RSK                 | 4926   | NUMA1     | lgnslrrgaSkalskaspn    |
| IP100292771 | 2071 | 2069 | unsp+PKC+PKA+RSK->PKA+RSK                 | unsp+PKC+PKA+RSK->PKA+RSK                 | 4926   | NUMA1     | lgnslrrgaSkalskaspn    |
| IP100292771 | 2071 | 2074 | unsp+PKC->PKC                             | unsp+PKC->PKC                             | 4926   | NUMA1     | lgnslrrgaSkalskaspn    |
| IP100293009 | 282  | 279  | PKC->                                     | unsp+PKC+PKA+RSK->PKA+RSK                 | 4926   | NUMA1     | lgnslrrgaSkalskaspn    |
| IP100293026 | 528  | 530  | unsp+PKC->                                | unsp+PKC+PKA+RSK->PKA+RSK                 | 4926   | NUMA1     | lgnslrrgaSkalskaspn    |
| IP100293276 | 78   | 75   | cdc2+PKA->PKA                             | unsp+PKC+PKA+RSK->PKA+RSK                 | 4926   | NUMA1     | lgnslrrgaSkalskaspn    |
| IP100293331 | 40   | 36   | unsp+CKII->unsp+PKA+CKII                  | unsp+PKC+PKA+RSK->PKA+RSK                 | 4926   | NUMA1     | lgnslrrgaSkalskaspn    |
| IP100293331 | 46   | 54   | unsp->unsp+cdc2                           | unsp+PKC+PKA+RSK->PKA+RSK                 | 4926   | NUMA1     | lgnslrrgaSkalskaspn    |
| IP100293350 | 68   | 67   | unsp+PKC->PKC                             | unsp+PKC+PKA+RSK->PKA+RSK                 | 4926   | NUMA1     | lgnslrrgaSkalskaspn    |
| IP100293426 | 455  | 453  | unsp+PKC->                                | unsp+PKC+PKA+RSK->PKA+RSK                 | 4926   | NUMA1     | lgnslrrgaSkalskaspn    |
| IP100293464 | 383  | 379  | cdc2->PKA                                 | unsp+PKC+PKA+RSK->PKA+RSK                 | 4926   | NUMA1     | lgnslrrgaSkalskaspn    |
| IP100293464 | 1067 | 1064 | unsp+PKC->PKC+PKA                         | unsp+PKC+PKA+RSK->PKA+RSK                 | 4926   | NUMA1     | lgnslrrgaSkalskaspn    |
| IP100293464 | 1067 | 1071 | unsp->                                    | unsp+PKC+PKA+RSK->PKA+RSK                 | 4926   | NUMA1     | lgnslrrgaSkalskaspn    |
| IP100293523 | 209  | 212  | PKC->                                     | unsp+PKC+PKA+RSK->PKA+RSK                 | 4926   | NUMA1     | lgnslrrgaSkalskaspn    |
| IP100293523 | 213  | 212  | PKC->                                     | unsp+PKC+PKA+RSK->PKA+RSK                 | 4926   | NUMA1     | lgnslrrgaSkalskaspn    |
| IP100293523 | 213  | 214  | ->PKC                                     | unsp+PKC+PKA+RSK->PKA+RSK                 | 4926   | NUMA1     | lgnslrrgaSkalskaspn    |
| IP100293523 | 213  |      |                                           |                                           |        |           |                        |

Table S3

|             |      |      |                                          |  |  |        |         |                        |
|-------------|------|------|------------------------------------------|--|--|--------|---------|------------------------|
| IP100293523 | 218  | 214  | ->PKA                                    |  |  | 1316   | KLF6    | fngcrkvtytKShlhahqrth  |
| IP100293523 | 218  | 215  | PKC+cdc2->cdc2                           |  |  | 1316   | KLF6    | ngcrkvtytKShlhahqrth   |
| IP100293568 | 123  | 128  | GSK3+p38MAPK->p38MAPK                    |  |  | 84220  | RGPD5   | veraaklfpGSpaiykikeal  |
| IP100293613 | 584  | 592  | ->INSR                                   |  |  | 29110  | TBK1    | inhkddkqYfNatkamthft   |
| IP100293655 | 268  | 269  | ->ATM+DNAPK                              |  |  | 1653   | DDX1    | skapdgyikYShlgnqaovtq  |
| IP100293655 | 281  | 280  |                                          |  |  | 1653   | DDX1    | qhsnqayqtKtflnnapkal   |
| IP100293657 | 29   | 20   |                                          |  |  | 3660   | IRF2    | plwieeqnsnTlpgklwnlke  |
| IP100293657 | 75   | 76   |                                          |  |  | 3660   | IRF2    | qpqvdkdpdkTwkanfrcmnn  |
| IP100293746 | 53   | 49   | unsp+PKC->unsp                           |  |  | 79169  | C1orf35 | vgrwqkgdrfTwyakgrapca  |
| IP100293845 | 1274 | 1271 | unsp+PKC+PKG+RSK->                       |  |  | 55183  | RIF1    | flpakqregTfSkdsdekv    |
| IP100293845 | 1274 | 1273 | unsp+CKII->unsp+CKI                      |  |  | 55183  | RIF1    | pkakqregTfSkdsdekv     |
| IP100293845 | 1274 | 1277 | unsp->                                   |  |  | 55183  | RIF1    | qregTfSkdsdekv         |
| IP100293921 | 581  | 584  | PKC+PKA->                                |  |  | 11073  | TOPBP1  | ikeanagkimSlirsrvadya  |
| IP100293921 | 581  | 589  | ->cdc2                                   |  |  | 11073  | TOPBP1  | agkimsllsTvdvayavpjl   |
| IP100294084 | 385  | 376  | ->cdc2                                   |  |  | 2034   | EPAS1   | hlmamnsfidsSsgkavseks  |
| IP100294084 | 385  | 383  | unsp+PKC->unsp+CKII                      |  |  | 2034   | EPAS1   | ifdssgkgavSeksnfiftkl  |
| IP100294084 | 385  | 391  | PKC->PKC+cdc2                            |  |  | 2034   | EPAS1   | avseksnfiftklkepeela   |
| IP100294084 | 685  | 681  | PKC->                                    |  |  | 2034   | EPAS1   | vspshvstfktTsakgfgarg  |
| IP100294084 | 685  | 683  | unsp+PKC->                               |  |  | 2034   | EPAS1   | phvstfktTsakgfgargpd   |
| IP100294158 | 269  | 267  | unsp+CKII->CKII                          |  |  | 644    | BLVR    | ifvqklgftSeklaaeakkr   |
| IP100294159 | 97   | 88   | PKA->cdc2+PKA                            |  |  | 6576   | SLC25A1 | hgvlglyrgfSlillygsipka |
| IP100294159 | 97   | 92   | SRC+unsp->unsp                           |  |  | 6576   | SLC25A1 | glyrglssltYgkipkaerf   |
| IP100294159 | 160  | 155  | PKC->                                    |  |  | 6576   | SLC25A1 | tkvxfkthdTsapnkygrff   |
| IP100294159 | 255  | 256  | unsp->                                   |  |  | 6576   | SLC25A1 | trmggleahkYmrtwdcdlqi  |
| IP100294159 | 255  | 259  | unsp+PKA->cdc2+PKA                       |  |  | 6576   | SLC25A1 | qglleahkYmrtwdcdlqllk  |
| IP100294186 | 264  | 263  | PKC->                                    |  |  | 114294 | LACTB   | egksneknrdTfktteqenea  |
| IP100294186 | 342  | 339  | unsp->unsp+PKA                           |  |  | 114294 | LACTB   | tliaaiveraGsgkyldymak  |
| IP100294186 | 342  | 343  | unsp->                                   |  |  | 114294 | LACTB   | aiverasgckYldymakifhd  |
| IP100294186 | 380  | 386  | unsp+p38MAPK->unsp                       |  |  | 114294 | LACTB   | vyynnkrvntTpyvndnsykw  |
| IP100294186 | 459  | 460  | unsp->SRC+unsp                           |  |  | 114294 | LACTB   | temswdkegkYamawgverkr  |
| IP100294211 | 260  | 256  | unsp+PKC+PKB+RSK->unsp+PKB+RSK           |  |  | 9785   | DXH38   | hrlstrdrdrSvrgkyddtp   |
| IP100294211 | 260  | 262  | PKA->                                    |  |  | 9785   | DXH38   | drdrsvrgkySddtjptpsv   |
| IP100294211 | 521  | 513  | unsp->unsp+PKA                           |  |  | 9785   | DXH38   | qkfdhmkYrSeassefakkk   |
| IP100294211 | 521  | 517  | unsp+PKC->unsp                           |  |  | 9785   | DXH38   | dhmkYrSeassefakkk      |
| IP100294211 | 521  | 524  | unsp+PKC+PKA->unsp+PKG+cdc2+PKA          |  |  | 9785   | DXH38   | eeassefakkkSileqrgylpi |
| IP100294211 | 522  | 524  | unsp+PKG+PKA->unsp                       |  |  | 9785   | DXH38   | eeassefakkkSileqrgylpi |
| IP100294495 | 122  | 118  | PKC->                                    |  |  | 51506  | UFC1    | kmyrggkicdTdhkplwam    |
| IP100294603 | 1282 | 1280 | unsp+PKC->PKC                            |  |  | 7750   | ZMYM2   | ctgdnedkItTgkrkhddep   |
| IP100294742 | 581  | 576  | PKC->                                    |  |  | 51574  | LARP7   | larP7                  |
| IP100294742 | 581  | 580  |                                          |  |  | 51574  | LARP7   | kinaktgkYfNatkamthft   |
| IP100294742 | 581  | 586  | unsp+PKA->unsp+CKI                       |  |  | 51574  | LARP7   | tkqaskchirSeyd-----    |
| IP100294744 | 220  | 216  | PKC->                                    |  |  | 5073   | PARN    | tgfrklyiyTlswkypkgih   |
| IP100294744 | 220  | 218  | unsp+PKC+cdc2->PKC+cdc2                  |  |  | 5073   | PARN    | frklyiyTlswkypkgih     |
| IP100294744 | 499  | 497  | unsp+PKC->                               |  |  | 5073   | PARN    | peqvkiavntTskyaesyrqt  |
| IP100294744 | 499  | 498  | unsp->unsp+DNAPK                         |  |  | 5073   | PARN    | peqvkiavntTskyaesyrqt  |
| IP100294744 | 499  | 503  | unsp+PKC->PKC                            |  |  | 5073   | PARN    | iaavntTskyaesyrqt      |
| IP100294744 | 566  | 562  | cdc2->unsp+cdc2                          |  |  | 5073   | PARN    | pyrntftapStvgkrnlrps   |
| IP100294744 | 566  | 570  | unsp+PKA+RSK->unsp+cdc2+PKA              |  |  | 5073   | PARN    | apstvgkrnlrps          |
| IP100294779 | 20   | 23   | ->EGFR                                   |  |  | 7419   | VDAC3   | kaakdkvkgfTgmgvkvldk   |
| IP100294779 | 62   | 56   | CKII->PKA+CKII                           |  |  | 7419   | VDAC3   | ghaytdtgkaSgnletkykvc  |
| IP100294779 | 62   | 61   | PKC->                                    |  |  | 7419   | VDAC3   | dtgkasgnleTkykcnvylgt  |
| IP100294779 | 62   | 63   | INSR+unsp->SRC+unsp                      |  |  | 7419   | VDAC3   | qkasgnleTkykcnvylgt    |
| IP100294779 | 64   | 56   | CKII->PKA+CKII                           |  |  | 7419   | VDAC3   | ghaytdtgkaSgnletkykvc  |
| IP100294779 | 64   | 61   | PKC->                                    |  |  | 7419   | VDAC3   | dtgkasgnleTkykcnvylgt  |
| IP100294779 | 64   | 63   | INSR+unsp->SRC+unsp                      |  |  | 7419   | VDAC3   | qkasgnleTkykcnvylgt    |
| IP100294779 | 91   | 87   | CKI+cdc2->unsp+CKI                       |  |  | 7419   | VDAC3   | ntdntgtgeSwnklaeglk    |
| IP100294840 | 747  | 750  | PKC->                                    |  |  | 202    | AIM1    | lkeYfdpkTfTgikgkkesq   |
| IP100294842 | 136  | 133  | PKC->                                    |  |  | 11183  | MAPK45  | etlgaglyvltTgkmrdkdg   |
| IP100294879 | 26   | 24   | unsp+PKC->PKC                            |  |  | 5905   | RANGAP1 | aktvaggglSfkgkslklnt   |
| IP100294879 | 26   | 29   | unsp+PKC+PKA->PKC+PKA                    |  |  | 5905   | RANGAP1 | aggglSfkgkslklnt       |
| IP100294879 | 528  | 525  | PKC+cdc2->                               |  |  | 5905   | RANGAP1 | rlvlhmglkSedkykaianl   |
| IP100294982 | 299  | 301  | unsp+PKC+PKG+cdc2+PKA->unsp+PKC+cdc2     |  |  | 2099   | ESR1    | lwpslmikrSkknsalslt    |
| IP100294982 | 302  | 301  | unsp+PKC+PKG+cdc2+PKA->unsp+PKC+cdc2+PKA |  |  | 2099   | ESR1    | lwpslmikrSkknsalslt    |
| IP100294982 | 303  | 294  |                                          |  |  | 2099   | ESR1    | gdmraanlwpSplmkrskkn   |
| IP100294982 | 303  | 301  | unsp+PKC+PKG+cdc2+PKA->PKG+cdc2+PKA      |  |  | 2099   | ESR1    | lwpslmikrSkknsalslt    |
| IP100294982 | 303  | 305  | PKA->PKC+PKA                             |  |  | 2099   | ESR1    | plmkrSkknsalslt        |
| IP100295004 | 533  | 530  | PKC->                                    |  |  | 57679  | AL52    | lplsrtvewTwgkgegglg    |
| IP100295363 | 46   | 44   | unsp+PKC->PKC                            |  |  | 5009   | OTC     | kvqlkgdrllTlknftgeek   |
| IP100295363 | 88   | 90   | unsp->                                   |  |  | 5009   | OTC     | kslgmifekrStrtrstetg   |
| IP100295363 | 88   | 91   | unsp+PKA->                               |  |  | 5009   | OTC     | slgmifekrStrtrstetg    |
| IP100295363 | 88   | 93   | PKC->                                    |  |  | 5009   | OTC     | gmifekrStrtrstetg      |
| IP100295363 | 231  | 228  | ->PKA                                    |  |  | 5009   | OTC     | atpkyepdaSvtklaeqyak   |
| IP100295363 | 238  | 236  |                                          |  |  | 5009   | OTC     | dasvtklaeqYakengtlll   |
| IP100295400 | 366  | 362  | PKC->                                    |  |  | 7453   | WARS    | asdpnsfItTatqktkv      |
| IP100295400 | 366  | 364  | PKC->                                    |  |  | 7453   | WARS    | drnsfItTatqktkv        |
| IP100296053 | 66   | 67   | unsp+EGFR->unsp                          |  |  | 2271   | FH      | fgeklvkdTgYagqavtrst   |
| IP100296053 | 66   | 68   | SRC+EGFR->SRC                            |  |  | 2271   | FH      | gelkvndkyYagqavtrst    |
| IP100296053 | 80   | 75   | unsp+PKC->                               |  |  | 2271   | FH      | dkyYagqavtrStmfnkigvt  |
| IP100296053 | 80   | 76   | PKC->                                    |  |  | 2271   | FH      | kyYagqavtrStmfnkigvt   |
| IP100296053 | 256  | 260  | PKC->                                    |  |  | 2271   | FH      | gyvqkvkyamTrikaampriy  |
| IP100296069 | 867  | 863  | unsp+PKC->unsp                           |  |  | 5926   | ARID4A  | klklrklgqSspekkirien   |
| IP100296183 | 3    | 2    | ->PKA                                    |  |  | 218    | ALDH3A1 | -----mSkiseavkrar      |
| IP100296183 | 178  | 174  |                                          |  |  | 218    | ALDH3A1 | pvngvypetTelkerfdrhi   |
| IP100296183 | 194  | 187  | ->cdc2                                   |  |  | 218    | ALDH3A1 | lkerfdrhiTgtygvgkim    |
| IP100296183 | 194  | 189  | PKC->                                    |  |  | 218    | ALDH3A1 | erfdrhiTgtygvgkim      |
| IP100296183 | 194  | 190  |                                          |  |  | 218    | ALDH3A1 | rdhilytgsTygvgkimta    |
| IP100296183 | 269  | 267  | unsp+PKC+PKG+PKA->unsp+PKG+PKA           |  |  | 218    | ALDH3A1 | qnqviekklSilefygedak   |
| IP100296337 | 117  | 112  | PKC->                                    |  |  | 5591   | PRKDC   | pysveikntTsvytkdraak   |
| IP100296337 | 117  | 113  | unsp+PKC->unsp+PKA                       |  |  | 5591   | PRKDC   | ysveikntTsvytkdraak    |
| IP100296337 | 117  | 116  | ->CKI                                    |  |  | 5591   | PRKDC   | eikntTsvyTkdraackcip   |
| IP100296337 | 832  | 837  |                                          |  |  | 5591   | PRKDC   | nkvlkhklkTklnsneais    |
| IP100296337 | 1057 | 1056 | unsp+PKC->unsp                           |  |  | 5591   | PRKDC   | pqqqekspvntSikfkyrlr   |
| IP100296337 | 1057 | 1058 | PKC->                                    |  |  | 5591   | PRKDC   | qekspvntSikfkyrlr      |
| IP100296337 | 1074 | 1079 | PKA->                                    |  |  | 5591   | PRKDC   | hpnafkqlgaSlafnnryef   |
| IP100296337 | 1970 | 1968 | unsp+PKC->cdc2+CKII                      |  |  | 5591   | PRKDC   | elkyYagfItSekpeknllf   |
| IP100296337 | 2259 | 2261 | unsp->unsp+PKC                           |  |  | 5591   | PRKDC   | ipyrIfefkSgkdpnskdns   |
| IP100296337 | 3260 | 3266 | unsp->unsp+cdc2+PKA                      |  |  | 5591   | PRKDC   | mklkelhkeSktddwlvsw    |
| IP100296337 | 3260 | 3268 | ->cdc2                                   |  |  | 5591   | PRKDC   | lkelhkeSktddwlvswvq    |
| IP100296337 | 3608 | 3610 | SRC+INSR+unsp->SRC+unsp                  |  |  | 5591   | PRKDC   | pvnnkiekmYermvaalgdp   |
| IP100296337 | 3638 | 3635 | unsp+PKC->PKC                            |  |  | 5591   | PRKDC   | lgafrfkqTfTgkfedkhg    |
| IP100296441 | 54   | 57   | unsp+PKC->                               |  |  | 100    | ADA     | lnvgmndkPtlpdlafdy     |
| IP100296441 | 232  | 233  | ->unsp+PKC                               |  |  | 100    | ADA     | vvkeavdlkTertghyhtl    |
| IP100296441 | 312  | 308  | unsp->unsp+EGFR                          |  |  | 100    | ADA     | lflkstldtYgmntkrdmgt   |
| IP100296441 | 312  | 311  |                                          |  |  | 100    | ADA     | kstldtYgmntkrdmgt      |
| IP100296635 | 68   | 70   | ->PKC                                    |  |  | 2632   | GBE1    | genegidkTfSrgyesfgvhr  |
| IP100296907 | 267  | 264  | unsp+PKC->                               |  |  | 51     | ACOX1   | mkyaqvkdpgTyvklpsnlt   |
| IP100296907 | 267  | 270  | unsp+PKC->unsp                           |  |  | 51     | ACOX1   | kpdgtyvklpsnlt         |
| IP100296907 | 272  | 270  | unsp+PKC->                               |  |  | 51     | ACOX1   | kpdgtyvklpsnlt         |
| IP100296907 | 272  | 275  | unsp->                                   |  |  | 51     | ACOX1   | ypklpsnlt              |
| IP100296907 | 437  | 438  | ->PKC                                    |  |  | 51     | ACOX1   | mlatartfmsSvdydygshkv  |
| IP100296907 | 437  | 439  | INSR->                                   |  |  | 51     | ACOX1   | lqatartfmsSvdydygshkv  |
| IP100296907 | 643  | 639  | p38MAPK->PKA+p38MAPK                     |  |  | 51     | ACOX1   | yenlfewaknSplnkaevhes  |
| IP100296907 | 651  | 649  | unsp+PKC->                               |  |  | 51     | ACOX1   | splnkaevhes            |
| IP100296907 | 651  | 655  | PKC->                                    |  |  | 51     | ACOX1   | evhesykhkSlqskl----    |
| IP100296913 | 42   | 40   | PKC->                                    |  |  | 11164  | NUDT5   | klektymdptTgktrtwesvk  |
| IP100296913 | 42   | 43   | ->unsp                                   |  |  | 11164  | NUDT5   | ktymdptTgktrtwesvk     |
| IP100296913 | 42   | 45   | PKC->                                    |  |  | 11164  | NUDT5   | tymdptTgktrtwesvk      |
| IP100296934 | 112  | 105  |                                          |  |  | 79576  | NKAP    | assvsvyysSvrgysdkpwp   |
| IP100296934 | 112  | 110  | unsp+PKC->                               |  |  | 79576  | NKAP    | vyysvsvrgysdkpwp       |
| IP100296934 | 112  | 116  | unsp->                                   |  |  | 79576  | NKAP    | rypsgkpwSldkereel      |
| IP100297254 | 1448 | 1444 | PKC->                                    |  |  | 23094  | SIPA1L3 | pfqlsasvpkSfkskqpvnmk  |
| IP100297254 | 1448 | 1447 |                                          |  |  | 23094  | SIPA1L3 | lsasvpkSfkskqpvnmk     |
| IP100297333 | 319  | 322  | unsp+PKC->unsp                           |  |  | 57465  | TBC1D24 | kqkgtvkvkSvlskrqfwh    |
| IP100297333 | 319  | 324  | unsp+PKC+cdc2->PKC+cdc2                  |  |  | 57465  | TBC1D24 | kgitvkvkSvlskrqfwh     |
| IP100297455 | 257  | 262  | unsp+PKC+PKG+PKA->unsp+PKC+PKA           |  |  | 26993  | AKAP8L  | fngmgkmqrTwktvttadfr   |
| IP100297477 | 179  | 178  |                                          |  |  | 6627   | SNRP1   | aqlakdiarSktfnpgaglp   |
| IP100297477 | 179  | 180  | PKG+RSK->PKG                             |  |  | 6627   | SNRP1   | lakdiarSktfnpgaglp     |
| IP100297550 | 222  | 215  | INSR+EGFR->EGFR                          |  |  | 2162   | F13A1   | vyvldgviYvevndiktrs    |

Table S3

|             |      |      |                                           |                                          |        |         |                        |
|-------------|------|------|-------------------------------------------|------------------------------------------|--------|---------|------------------------|
| IPI00297550 | 222  | 225  | unsp+PKA->                                | unsp+PKA->                               | 2162   | F13A1   | ygevdiktRswsgyggedgi   |
| IPI00297550 | 222  | 227  | unsp+PKA->unsp                            |                                          | 2162   | F13A1   | evndiktrswSgyggedgld   |
| IPI00297550 | 678  | 674  | PKC->                                     | PKC->                                    | 2162   | F13A1   | vwvldggpgvTrpmkkmfrei  |
| IPI00297572 | 576  | 575  | unsp+PKC->unsp                            | unsp+PKC->unsp                           | 9716   | AQR     | itvrtppkygTkdrrprie    |
| IPI00297579 | 10   | 7    | PKC->                                     | PKC->                                    | 11335  | CBX3    | -----masnkTtqkmgkqgn   |
| IPI00297579 | 10   | 7    | PKC->                                     | PKC->                                    | 11335  | CBX3    | -----masnkTtqkmgkqgn   |
| IPI00297579 | 21   | 19   | unsp+PKC->unsp                            | unsp+PKC->unsp                           | 11335  | CBX3    | qkmgkqgnkSkkveeaepee   |
| IPI00297579 | 50   | 55   | PKC->                                     | PKC->                                    | 11335  | CBX3    | veyfikwkgTfTadntwepee  |
| IPI00297779 | 154  | 150  |                                           |                                          | 10576  | CT2     | allissavdhgSdevfrqdlm  |
| IPI00297779 | 181  | 180  | PKC+cdc2->cdc2                            | PKC+cdc2->                               | 10576  | CT2     | klthhkhdfTklaevearil   |
| IPI00297851 | 1338 | 1329 |                                           | unsp+PKC+cdc2->unsp+PKC                  | 1105   | CHD1    | kkealsgagsSkrrkarakcn  |
| IPI00297851 | 1346 | 1344 | unsp+PKC->PKC                             | unsp+PKC->                               | 1105   | CHD1    | araknnkamSiikvkeekisd  |
| IPI00297921 | 238  | 230  | unsp+RSK->unsp                            |                                          | 81856  | ZNPF11  | qkqevhmrekSfagcnkskaf  |
| IPI00297921 | 238  | 236  | unsp+PKC->cdc2                            |                                          | 81856  | ZNPF11  | nreksfqnkSgkafmskjl    |
| IPI00297931 | 513  | 505  | PKC->PKC+cdc2                             | unsp+PKC->                               | 11276  | SYNRG   | apellmplogTkalpsmdkya  |
| IPI00297931 | 513  | 510  | unsp+PKC->                                | unsp+PKC->unsp                           | 11276  | SYNRG   | mplpgtkalpSmdkyavkgi   |
| IPI00297931 | 744  | 739  | PKC->                                     | PKC->                                    | 11276  | SYNRG   | gstvkkgansTaastkydvfr  |
| IPI00297931 | 744  | 742  | unsp+PKC->                                | unsp+PKC->                               | 11276  | SYNRG   | vkqgnstaaStkydvfrqls   |
| IPI00297931 | 744  | 743  |                                           | unsp->unsp+DNAPK                         | 11276  | SYNRG   | kqgnstaastkydvfrqlsl   |
| IPI00297931 | 744  | 745  | unsp->                                    | unsp->                                   | 11276  | SYNRG   | qgnstaastkydvfrqlsl    |
| IPI00297931 | 744  | 752  | unsp+CKI+PKA->unsp+CKI                    | unsp+CKI+PKA->unsp+CKI                   | 11276  | SYNRG   | stkydvfrqfSiegsiglvad  |
| IPI00298202 | 318  | 315  | unsp->PKA                                 | unsp->unsp+PKA                           | 10005  | ACOT8   | egvrvkpqvSeski-----    |
| IPI00298202 | 318  | 317  | unsp+DNAPK                                | ->ATM+DNAPK                              | 10005  | ACOT8   | uvzkykqyvsSki-----     |
| IPI00298301 | 1880 | 1878 | unsp+PKC->unsp                            | unsp+PKC->unsp                           | 4621   | MYH3    | hvdqlkvkvkSyrqaeade    |
| IPI00298301 | 1880 | 1879 |                                           | ->EGFR                                   | 4621   | MYH3    | vdqlkvkvksYkrqaeadeq   |
| IPI00298308 | 886  | 883  | PKC->                                     | PKC->                                    | 160428 | ALDH1L2 | kleagtvfinTynktDvaapf  |
| IPI00298308 | 903  | 899  | ->PKA                                     | ->PKA                                    | 160428 | ALDH1L2 | vaapfvgvkqSgfgkdgeea   |
| IPI00298406 | 244  | 245  |                                           | p38MAPK->unsp+p38MAPK                    | 3033   | HADH    | pvmklvevivTpmtsqtktfs  |
| IPI00298406 | 244  | 248  |                                           | unsp->                                   | 3033   | HADH    | kiveviktptmTsqtktfsvd  |
| IPI00298406 | 261  | 260  | ->PKA+DNAPK                               | ->ATM+DNAPK                              | 3033   | HADH    | qktktfsvdSkalgkhpvscc  |
| IPI00298406 | 317  | 316  | unsp->unsp+DNAPK                          | unsp->ATM+unsp+DNAPK                     | 3033   | HADH    | glgfskdgdsdiedidamkl   |
| IPI00298423 | 194  | 196  | unsp+PKA->                                | unsp+PKA->unsp                           | 8050   | PDHX    | paamlelekhSdasogtatg   |
| IPI00298547 | 148  | 142  |                                           | ->cdc2                                   | 11315  | PARK7   | kmmngghyTySenrveldgll  |
| IPI00298558 | 179  | 171  | unsp->unsp+PKA                            |                                          | 11235  | PDCD10  | ehqkfevkvYSkfsdtkity   |
| IPI00298558 | 179  | 175  | ->PKA                                     | ->unsp                                   | 11235  | PDCD10  | kefvkyksfSdtkityfkdg   |
| IPI00298558 | 179  | 177  | unsp+PKC->                                | unsp+PKC->                               | 11235  | PDCD10  | fvkyksfSdtkityfkdgkva  |
| IPI00298558 | 179  | 180  |                                           | PKC->unsp+PKC                            | 11235  | PDCD10  | yskfsdtkityfkdgkainv   |
| IPI00298612 | 192  | 195  |                                           | unsp->unsp+PKC                           | 10295  | BCKDK   | lvryfdktITsrilgimlat   |
| IPI00298731 | 207  | 204  | unsp+PKC->                                |                                          | 5514   | PPP1R10 | kpsrlrtapShakfrstgle   |
| IPI00298731 | 207  | 211  | unsp+CKII+PKA->unsp+CKII                  | unsp+CKII+PKA->unsp+CKII                 | 5514   | PPP1R10 | tapshakfrSTglejstpslv  |
| IPI00298731 | 239  | 236  |                                           | unsp->                                   | 5514   | PPP1R10 | nastvsvskTnlpkjpklrq   |
| IPI00298731 | 274  | 273  |                                           | ->DNAPK                                  | 5514   | PPP1R10 | ypklnttpnaTkeikvkvipr  |
| IPI00298860 | 321  | 323  | PKG+cdc2->cdc2                            | PKG+cdc2->cdc2                           | 4057   | LTF     | sgqklldfkDsaigrsvrppr  |
| IPI00298935 | 361  | 358  | unsp+PKC->PKA                             | unsp+PKC->PKC+PKA                        | 51780  | KDM3B   | pqinnmirfaTytkengrtlv  |
| IPI00298935 | 361  | 360  |                                           | ->DNAPK                                  | 51780  | KDM3B   | imnirfatyTkengrtlvqv   |
| IPI00298961 | 568  | 564  | PKC->                                     |                                          | 7514   | XPO1    | flrahwkflkTvnnkifemfh  |
| IPI00298961 | 686  | 684  | unsp+PKC->                                | unsp+PKC->                               | 7514   | XPO1    | knvdilkdpvTkgqlsilkt   |
| IPI00298961 | 686  | 690  | PKC->                                     |                                          | 7514   | XPO1    | kdpvTkgqlSikltnvrack   |
| IPI00298961 | 693  | 690  | PKC->PKA                                  |                                          | 7514   | XPO1    | kdpvTkgqlSikltnvrack   |
| IPI00298994 | 2043 | 2040 | unsp+DNAPK->DNAPK                         |                                          | 7094   | TLN1    | tkvlqvnaasgSgklaqaags  |
| IPI00298994 | 2043 | 2050 | unsp+PKC->unsp+PKC+cdc2                   | unsp+PKC->unsp+PKC+cdc2                  | 7094   | TLN1    | sgeklagaagSevatrlrad   |
| IPI00298994 | 2115 | 2117 | PKC+PKG->PKC                              | PKC+PKG->                                | 7094   | TLN1    | ddpavwlknSakvmvntvts   |
| IPI00299095 | 469  | 468  |                                           | CKI->ATM+DNAPK                           | 6643   | SNX2    | qgqderfeqISkrtkevgfr   |
| IPI00299145 | 173  | 169  | PKC->                                     | PKC->                                    | 286887 | KRT6C   | vraeereqikTlnnkfasfid  |
| IPI00299145 | 173  | 176  | unsp+PKC->unsp                            |                                          | 286887 | KRT6C   | qiktlnnkfaSfidkvrflq   |
| IPI00299147 | 11   | 12   |                                           | CKII->unsp+CKII                          | 6612   | SUMO3   | seepkqevkvTendhinikva  |
| IPI00299147 | 41   | 37   | unsp+p38MAPK->unsp+PKA+p38MAPK            | unsp+p38MAPK->p38MAPK                    | 6612   | SUMO3   | svvqkkrhTPlsklmkayc    |
| IPI00299147 | 41   | 40   |                                           | PKC->ATM+PKC+DNAPK                       | 6612   | SUMO3   | qfkihrhTPlsklmkaycerq  |
| IPI00299147 | 44   | 40   | PKC->unsp                                 | PKC->unsp+PKC                            | 6612   | SUMO3   | qfkihrhTPlsklmkaycerq  |
| IPI00299149 | 11   | 12   |                                           | CKII->unsp+CKII                          | 6613   | SUMO2   | adekqevkvTenndhinikv   |
| IPI00299149 | 42   | 38   | unsp+p38MAPK->unsp+PKA+p38MAPK            | unsp+p38MAPK->p38MAPK                    | 6613   | SUMO2   | svvqkkrhTPlsklmkayc    |
| IPI00299149 | 42   | 41   |                                           | PKC->ATM+PKC+DNAPK                       | 6613   | SUMO2   | qfkihrhTPlsklmkaycerq  |
| IPI00299149 | 45   | 41   | PKC->unsp                                 | PKC->unsp+PKC                            | 6613   | SUMO2   | qfkihrhTPlsklmkaycerq  |
| IPI00299155 | 127  | 121  | INSR+unsp+EGFR->unsp+EGFR                 | INSR+unsp+EGFR->unsp+EGFR                | 5685   | PSMA4   | vtalcdikqaYtgqgkrpfg   |
| IPI00299155 | 176  | 173  | unsp->                                    |                                          | 5685   | PSMA4   | cignnsaaavSmkqdykege   |
| IPI00299155 | 176  | 179  | INSR+unsp->                               | INSR+unsp->                              | 5685   | PSMA4   | aaavsmkqdykegetmksa    |
| IPI00299155 | 180  | 179  | INSR+unsp->                               | INSR+unsp->INSR                          | 5685   | PSMA4   | aaavsmkqdykegetmksa    |
| IPI00299254 | 784  | 775  | unsp+PKC->unsp+PKC+cdc2                   |                                          | 9669   | E1F5B   | kspdsdvaTtkqkknktkd    |
| IPI00299254 | 784  | 783  | unsp+PKC+CKII->unsp+CKII                  | unsp+PKG+CKII->unsp+CKII+DNAPK           | 9669   | E1F5B   | aatlkkqknTKdefeeraak   |
| IPI00299254 | 923  | 919  |                                           | unsp->INSR+unsp+EGFR                     | 9669   | E1F5B   | pmkelrvnqYekhkeveaaq   |
| IPI00299263 | 228  | 231  | unsp+PKC+PKA->PKA                         | unsp+PKC+PKA->PKC+PKA                    | 26286  | ARFGAP3 | akkglgakkGSlgaqklantc  |
| IPI00299263 | 229  | 231  | unsp+PKC+PKA->PKC+PKA                     | unsp+PKC+PKA->unsp+PKA                   | 26286  | ARFGAP3 | akkglgakkGSlgaqklantc  |
| IPI00299313 | 158  | 155  | PKC+CKII->CKII                            | PKC+CKII->CKII                           | 51377  | UCLH5   | rqgmfeidtkTsakeedafhf  |
| IPI00299402 | 1090 | 1086 | ->PKA                                     |                                          | 5091   | PC      | vfflengqlrSilvktqamk   |
| IPI00299402 | 1090 | 1092 |                                           | ->DNAPK                                  | 5091   | PC      | qglsrlskvKTgmekmehfhp  |
| IPI00299417 | 24   | 28   | unsp+PKG+CKII+PKA+RSK->unsp+PKG+CKII+PKA  | unsp+PKG+CKII+PKA+RSK->unsp+PKG+CKII+PKA | 8563   | THOC5   | gaapeakrnSdteogekyys   |
| IPI00299463 | 208  | 207  | PKC->DNAPK                                | PKC->ATM+DNAPK                           | 4683   | NBN     | ypdpdpsigSkndvlsgrne   |
| IPI00299463 | 334  | 330  | ->PKA                                     | ->PKA                                    | 4683   | NBN     | knycdpqghpStglktttppg  |
| IPI00299463 | 334  | 331  | PKC->                                     | PKC->                                    | 4683   | NBN     | nycdpqghpsTglktttppgs  |
| IPI00299463 | 334  | 336  | ->PKC                                     | ->PKC                                    | 4683   | NBN     | qghpstglktTtpgslsqgv   |
| IPI00299463 | 334  | 337  | unsp+cdk5+p38MAPK->unsp+GSK3+cdk5+p38MAPK |                                          | 4683   | NBN     | ghpstglktTtpgslsqgvs   |
| IPI00299463 | 441  | 438  | unsp+PKC->                                | unsp+PKC->PKC                            | 4683   | NBN     | nyqslptklpSinksksdrasq |
| IPI00299463 | 504  | 509  | unsp+CKII->CKII                           | unsp+CKII->CKII                          | 4683   | NBN     | slwknkeqHSenepvdtnsd   |
| IPI00299463 | 544  | 537  | ->cdc2                                    |                                          | 4683   | NBN     | dklsvknskShaaekirns    |
| IPI00299463 | 544  | 539  | unsp+PKC->PKC                             | unsp+PKC->PKC                            | 4683   | NBN     | ksivknsakShaaekirns    |
| IPI00299463 | 665  | 667  | unsp+PKC->PKC                             |                                          | 4683   | NBN     | tefrslvknStrnpsgind    |
| IPI00299463 | 665  | 668  | unsp+PKC->PKC                             | unsp+PKC->PKC                            | 4683   | NBN     | efrslviknsTrnpsgindd   |
| IPI00299463 | 665  | 669  | unsp->                                    |                                          | 4683   | NBN     | frslviknsTrnpsginddy   |
| IPI00299463 | 715  | 717  | unsp+PKG+PKA+CKII->unsp+CKII              | unsp+PKG+PKA+CKII->unsp+CKII             | 4683   | NBN     | diahharknTelewlrqem    |
| IPI00299465 | 263  | 268  | PKC->                                     | PKC->                                    | 54585  | LZTFL1  | ekelekkfqgTaayrnmkeil  |
| IPI00299507 | 640  | 638  | unsp+PKC->PKC                             | unsp+PKC->PKC                            | 23397  | NCAPH   | vnkieihyakTakkmdmklk   |
| IPI00299571 | 154  | 152  | unsp+PKC->                                | unsp+PKC->                               | 10130  | PDIA6   | ggqvqvgpTlTfkgknknr    |
| IPI00299571 | 154  | 158  | unsp+PKC->PKC                             |                                          | 10130  | PDIA6   | qgflqkrlpTlTfkgknknr   |
| IPI00299571 | 293  | 291  | unsp+PKC->                                | unsp+PKC->                               | 10130  | PDIA6   | esrygrlqTlTfkgknknr    |
| IPI00299571 | 293  | 300  | unsp+GSK3->unsp+GSK3+cdc2                 |                                          | 10130  | PDIA6   | ptikfkgqSpdvdydggrt    |
| IPI00299573 | 97   | 91   | ->PKA                                     |                                          | 6130   | RPL7A   | nqftaldrqTatqlklahk    |
| IPI00299573 | 97   | 93   | PKC+DNAPK->DNAPK                          | PKC+DNAPK->DNAPK                         | 6130   | RPL7A   | ftqaldrqTatqlklahk     |
| IPI00299608 | 310  | 311  | GSK3+cdk5+p38MAPK->GSK3+p38MAPK           | GSK3+cdk5+p38MAPK->unsp+cdk5+p38MAPK     | 5707   | PSMD1   | ektssavpvtPeaspekdq    |
| IPI00299749 | 487  | 489  | INSR->                                    | INSR->                                   | 7564   | ZNF16   | hqihtgekpYrcsvcgkafss  |
| IPI00299749 | 487  | 492  | PKC+cdc2+PKA->cdc2                        | PKC+cdc2+PKA->cdc2+PKA                   | 7564   | ZNF16   | ihntgekpYrcsvcgkafss   |
| IPI00300026 | 197  | 190  | ->p38MAPK                                 |                                          | 6817   | SULT1A1 | lpsgmektkDpaprikthl    |
| IPI00300052 | 175  | 171  | ->PKA                                     |                                          | 3890   | KRT84   | vkdekeqikTlnnkfasfid   |
| IPI00300052 | 175  | 178  | unsp+PKC->unsp                            |                                          | 3890   | KRT84   | qiktlnnkfaSfidkvrflq   |
| IPI00300052 | 182  | 178  | unsp+PKC->unsp                            | unsp+PKC->unsp                           | 3890   | KRT84   | qiktlnnkfaSfidkvrflq   |
| IPI00300060 | 452  | 443  | unsp->unsp+cdc2                           |                                          | 55100  | WDR70   | pddkiltvtgTsiqrgcgskl  |
| IPI00300060 | 452  | 450  | PKC+PKA->PKA                              | PKC+PKA->PKA                             | 55100  | WDR70   | tgtsiqrgcgSgklvffert   |
| IPI00300060 | 520  | 524  |                                           | ->cdc2                                   | 55100  | WDR70   | ktqkakqaeTltdyiltpth   |
| IPI00300078 | 700  | 696  | PKC+cdc2->                                | PKC+cdc2->unsp+PKC+cdc2                  | 5822   | PWP2    | lpgvrkgdmsShrhkpeivrt  |
| IPI00300078 | 700  | 707  | unsp+PKC+RSK->unsp+PKC+PKA+RSK            |                                          | 5822   | PWP2    | lphkpeivrtSftrspgtcrw  |
| IPI00300127 | 426  | 424  | unsp+PKC+PKA->cdc2+PKA+RSK                |                                          | 55226  | NAT10   | ngyegtrgkTSiklqkrrq    |
| IPI00300186 | 360  | 356  | unsp->unsp+PKA                            | unsp+PKC+PKA->PKA+RSK                    | 79675  | FASTKD1 | gamgdesmrsSiktrvsvl    |
| IPI00300186 | 360  | 364  | unsp+PKC+RSK->                            |                                          | 79675  | FASTKD1 | msclkrvtSvlhlddyk      |
| IPI00300371 | 109  | 106  | PKC->                                     |                                          | 23450  | SF3B3   | knmfekihqTfkgsgcrv     |
| IPI00300371 | 109  | 110  | unsp->                                    | unsp->                                   | 23450  | SF3B3   | ekihqetfkgSgcrvpggf    |
| IPI00300386 | 453  | 458  | unsp->                                    |                                          | 2873   | GPS1    | nqihvklptStdlpgpgsv    |
| IPI00300567 | 283  | 282  | ->ATM+DNAPK                               | ->ATM+DNAPK                              | 1632   | DCI     | advqnfvstSksdiqslqm    |
| IPI00300567 | 283  | 285  | unsp->PKC                                 |                                          | 1632   | DCI     | hfvsvfskdSiqslqmyle    |
| IPI00300631 | 475  | 478  | unsp+PKC->cdc2                            | unsp+PKC->PKC+cdc2                       | 6294   | SAFB    | hktelhgkmsSvekakepvg   |
| IPI00300631 | 607  | 601  | unsp->unsp+PKA                            |                                          | 6294   | SAFB    | dkrsarekrSvsvdkvkep    |
| IPI00300631 | 607  | 604  | CKI+PKC->PKC                              |                                          | 6294   | SAFB    | sasrekrsvvSfdkvkprks   |
| IPI00300631 | 805  | 801  |                                           | ->EGFR                                   | 6294   | SAFB    | dsrdsrdgwgYgskdmrsegr  |
| IPI00300631 | 805  | 803  | PKC->cdc2+CKII                            | PKC->                                    | 6294   | SAFB    | dsrdsrdgwgYgskdmrsegr  |
| IPI00300631 | 805  | 808  | unsp+PKA->unsp+cdc2                       | unsp+PKA->unsp                           | 6294   | SAFB    | wggysgskrmSegrlppppr   |
| IPI00300725 | 173  | 169  | PKC->                                     | PKC->                                    | 3853   | KRT6A   | vraeereqikTlnnkfasfid  |
| IPI00300725 | 173  | 176  | unsp+PKC->unsp                            |                                          | 3853   | KRT6A   | qiktlnnkfaSfidkvrflq   |
| IPI00301058 | 283  | 278  | unsp+PKC+PKB->unsp+PKB+PKA                | unsp+PKC+PKB->unsp+PKB                   | 7408   | VASP    | namlarrkaTqvgektpkde   |
| IPI00301058 | 283  | 289  | unsp->unsp+CKII                           |                                          | 7408   | VASP    | qvgektpkdeSanqeepaarv  |
| IPI00301154 | 259  | 262  | unsp->                                    | unsp->                                   | 5042   | PABPC3  | ngkelngqVvgraqkvver    |

Table S3

|             |      |      |                                          |                                          |                        |        |           |                        |
|-------------|------|------|------------------------------------------|------------------------------------------|------------------------|--------|-----------|------------------------|
| IP100301224 | 236  | 232  | unsp->unsp+PKA                           |                                          |                        | 55217  | TMLHE     | yftsfdsrgdTaytklaldrh  |
| IP100301224 | 236  | 234  | unsp+EGFR->unsp                          |                                          |                        | 55217  | TMLHE     | tsdsfsgdtaYtklaldrh    |
| IP100301263 | 747  | 746  |                                          | PKA->ATM+DNAPK                           |                        | 790    | CAD       | cvvkiprwdlSkfrstvkig   |
| IP100301263 | 747  | 752  | unsp+PKC+PKA->unsp                       | unsp+PKC+PKA->unsp+PKA                   |                        | 790    | CAD       | nwldskfrnVStkigscmksv  |
| IP100301263 | 1411 | 1406 | unsp+PKC+cdc2+PKA+RSK->unsp+cdc2+PKA+RSK | unsp+PKC+cdc2+PKA+RSK->unsp+cdc2+PKA+RSK | PHOsphoELM PhosphoSite | 790    | CAD       | smngaggrVsfvtykgyrr    |
| IP100301263 | 1411 | 1407 | PKC+RSK->PKA+RSK                         | PKC+RSK->unsp+PKA+RSK                    |                        | 790    | CAD       | mrgaagrsVsfvtykgyrr    |
| IP100301323 | 460  | 465  | PKC+PKG->PKG                             | PKC+PKG->PKG                             |                        | 8886   | DDX18     | ihgkqlqnkrTtffqcnad    |
| IP100301323 | 460  | 466  | ->PKA                                    |                                          |                        | 8886   | DDX18     | hgkqknkrTtffqcnads     |
| IP100301323 | 571  | 563  | ATM+CKII+DNAPK->CKII+DNAPK               |                                          |                        | 8886   | DDX18     | fwskisdiqSglekikeny    |
| IP100301518 | 149  | 146  | ->PKA                                    | ->PKA                                    |                        | 55233  | MOBK1B    | igvppknfmsVaktiklrf    |
| IP100301609 | 731  | 730  | PKC+cdc2->PKA+cdc2                       | PKC+cdc2->ATM+cdc2+DNAPK                 |                        | 91754  | NEK9      | tlilvekvlnSktrsnssl    |
| IP100302238 | 383  | 391  | ->cdc2                                   |                                          |                        | 26574  | AATF      | lgkgfagerSiltqdiilm    |
| IP100302742 | 133  | 128  | unsp+PKA+RSK->unsp+PKA                   |                                          |                        | 79656  | BEND5     | hikrpegrkpSevahskieav  |
| IP100302829 | 427  | 424  |                                          | unsp+EGFR->EGFR                          |                        | 5925   | RB1       | silrvkdigVrifekefay    |
| IP100302829 | 640  | 638  | unsp+PKC->unsp                           | unsp+PKC->unsp+DNAPK                     |                        | 5925   | RB1       | aetqatsafqTqkplkstls   |
| IP100302829 | 640  | 645  |                                          | ->PKG                                    |                        | 5925   | RB1       | afqtqkplksTslsfykvy    |
| IP100302829 | 640  | 646  | ->PKA                                    |                                          |                        | 5925   | RB1       | ftqtqkplkstSlisfykvyr  |
| IP100302829 | 652  | 644  | ->PKA                                    |                                          |                        | 5925   | RB1       | saftqtkplkSlisfykvy    |
| IP100302829 | 652  | 646  | ->PKA                                    |                                          |                        | 5925   | RB1       | ftqtqkplkstSlisfykvyr  |
| IP100302829 | 652  | 648  | PKC+cdc2->PKC+PKA                        | PKC+cdc2->PKC+PKA+cdc2                   |                        | 5925   | RB1       | tqtkplkstSlisfykvyrla  |
| IP100302829 | 652  | 655  | INSR->                                   | INSR->                                   |                        | 5925   | RB1       | tslsfykvyVriayirlnl    |
| IP100302927 | 139  | 136  | PKC->                                    |                                          |                        | 55522  | ILK-2     | kghlptiseSfqalekie     |
| IP100302927 | 288  | 293  | PKG+PKA->                                |                                          |                        | 55522  | ILK-2     | linlsvkqkTpcrvlks      |
| IP100302927 | 302  | 310  | ->cdc2                                   |                                          |                        | 55522  | ILK-2     | iqksilrdaISdlahfnfkm   |
| IP100302927 | 319  | 310  | ->cdc2                                   |                                          |                        | 55522  | ILK-2     | iqksilrdaISdlahfnfkm   |
| IP100303133 | 6    | 7    | unsp->                                   | unsp->                                   |                        | 8345   | HIST1H2BH | -----mpdpakSapapkkgsqk |
| IP100303133 | 12   | 7    | unsp->                                   | unsp->                                   |                        | 8345   | HIST1H2BH | -----mpdpakSapapkkgsqk |
| IP100303133 | 12   | 15   | unsp+PKC->PKC                            | unsp+PKC->PKC                            | Uniprot                | 8345   | HIST1H2BH | aksapapkgSkkavtkaaqk   |
| IP100303133 | 13   | 15   | unsp+PKC->PKC                            |                                          | Uniprot                | 8345   | HIST1H2BH | aksapapkgSkkavtkaaqk   |
| IP100303133 | 16   | 15   | unsp+PKC->unsp+PKC+PKA                   | unsp+PKC->ATM+unsp+PKC+DNAPK             | Uniprot                | 8345   | HIST1H2BH | aksapapkgSkkavtkaaqk   |
| IP100303133 | 21   | 15   | unsp+PKC->unsp+PKC+PKA                   | unsp+PKC->unsp+PKC+PKA                   | Uniprot                | 8345   | HIST1H2BH | aksapapkgSkkavtkaaqk   |
| IP100303133 | 21   | 20   | PKC->                                    | PKC->PKC+DNAPK                           |                        | 8345   | HIST1H2BH | apgkgskvTkaqkdgqkkr    |
| IP100303133 | 109  | 113  | unsp->                                   |                                          |                        | 8345   | HIST1H2BH | pggelakhvSegtkavtkyt   |
| IP100303133 | 121  | 120  |                                          | ->ATM+DNAPK                              |                        | 8345   | HIST1H2BH | havsegtkavTkytssk----  |
| IP100303133 | 121  | 123  | PKC->                                    | PKC->                                    |                        | 8345   | HIST1H2BH | segtkavtkyTssk-----    |
| IP100303135 | 244  | 243  |                                          | PKC+cdc2->ATM+PKC+cdc2+DNAPK             |                        | 55247  | NEIL3     | yrckaglalSkhykvykrpn   |
| IP100303135 | 247  | 243  | PKC+cdc2->                               |                                          |                        | 55247  | NEIL3     | yrckaglalSkhykvykrpn   |
| IP100303207 | 121  | 117  | ->PKA                                    | ->PKA                                    |                        | 6059   | ABCE1     | glvgtngigkStalkilagkq  |
| IP100303207 | 121  | 118  | PKC->                                    | PKC->                                    |                        | 6059   | ABCE1     | lvgtnigigkStalkilagkq  |
| IP100303207 | 191  | 186  | unsp+PKC->                               | unsp+PKC->                               |                        | 6059   | ABCE1     | ipkzskgtvgSldkrdekt    |
| IP100303207 | 191  | 194  | PKC->                                    |                                          |                        | 6059   | ABCE1     | vgsldrkteTktavccql     |
| IP100303207 | 349  | 348  | unsp->                                   |                                          |                        | 6059   | ABCE1     | neeevkkmcYkypgmkkkm    |
| IP100303207 | 431  | 423  | unsp+PKC->unsp+PKC+PKA                   |                                          |                        | 6059   | ABCE1     | pqiskstgSvrgllhekir    |
| IP100303207 | 431  | 436  |                                          | INSR+EGFR->INSR                          |                        | 6059   | ABCE1     | qlilhekirdaYthpqfvtvdm |
| IP100303402 | 112  | 103  | ATM+unsp+DNAPK->ATM+unsp+cdc2+DNAPK      |                                          |                        | 51808  | PHAX      | kpepfqggsSqkppvaggk    |
| IP100303476 | 133  | 128  | ->PKA                                    |                                          |                        | 506    | ATP5B     | glvrqkvldSgapiklvpv    |
| IP100303476 | 259  | 263  | unsp->                                   |                                          |                        | 506    | ATP5B     | svgnlkdatSkvalvygmn    |
| IP100303476 | 522  | 528  |                                          |                                          |                        | 506    | ATP5B     | akaddlaeeS5-----       |
| IP100303797 | 418  | 411  | ->cdc2                                   |                                          |                        | 673    | BRAF      | tpaspglVtrfkqlkspg     |
| IP100303832 | 413  | 411  | unsp+PKC+PKG->                           | unsp+PKC+PKG->                           |                        | 23168  | RTF1      | gsvtqvevfkqlyvgqtr     |
| IP100304306 | 93   | 96   | unsp+cdk5->GSK3+cdk5+cdc2                | unsp+cdk5->cdk5+cdc2                     |                        | 131118 | DNAJC19   | mlnhpdkpgSpyiakinea    |
| IP100304409 | 68   | 73   | PKG+PKA->                                | PKG+PKA->PKG                             |                        | 23589  | CARHSP1   | ykgvcfcfrSkghgfttadp   |
| IP100304417 | 154  | 155  | PKA->CKI+PKA                             | PKA->CKI+PKA                             |                        | 3420   | IDH3B     | difanvvhvkSlpgymtrhnn  |
| IP100304417 | 201  | 198  | PKC->                                    |                                          |                        | 3420   | IDH3B     | rgvieckivTraksqriaf    |
| IP100304417 | 201  | 202  | unsp+PKC+RSK->unsp+PKC+DNAPK+RSK         | unsp+PKC+RSK->unsp+PKC+DNAPK+RSK         |                        | 3420   | IDH3B     | eclikivtrakSoriakafdy  |
| IP100304417 | 207  | 202  | unsp+PKC+RSK->unsp+RSK                   | unsp+PKC+RSK->unsp+RSK                   |                        | 3420   | IDH3B     | eclikivtrakSoriakafdy  |
| IP100304417 | 382  | 377  | PKC+cdc2->cdc2                           | PKC+cdc2->cdc2                           |                        | 3420   | IDH3B     | trdrmgysytTdfiksvigh   |
| IP100304417 | 382  | 378  | PKC->                                    | PKC->                                    |                        | 3420   | IDH3B     | trdrmgysytTdfiksvigh   |
| IP100304417 | 382  | 383  | PKC->                                    | PKC->PKC                                 |                        | 3420   | IDH3B     | gysytdfklSvighlqkgs    |
| IP100304431 | 258  | 255  | PKC+PKG+PKA+RSK->PKG+PKA+RSK             | PKC+PKG+PKA+RSK->PKG+PKA                 |                        | 79650  | C16orf57  | rvhteqrcvckSgnklfsmplk |
| IP100304435 | 51   | 46   | ->PKA                                    | ->PKA                                    |                        | 8508   | NIPSNAP1  | skdneqsvrfrSflvhkvdprk |
| IP100304527 | 418  | 427  | unsp->unsp+cdc2                          | unsp->unsp+cdc2                          | Uniprot PhosphoSite    | 222584 | FAM83B    | kkpsdsdsvaSSsregvshh   |
| IP100304596 | 5    | 3    | PKC->                                    | PKC->                                    |                        | 4841   | NONO      | -----mqSntkflekqn      |
| IP100304596 | 11   | 6    | PKC->                                    | PKC->                                    |                        | 4841   | NONO      | -----mqSntkflekqn      |
| IP100304596 | 11   | 15   | PKC+p38MAPK->p38MAPK                     |                                          |                        | 4841   | NONO      | ktnflekqnThprkhhghh    |
| IP100304596 | 68   | 68   | PKG->                                    | ->unsp+PKC                               |                        | 4841   | NONO      | klmfkpggkTsrfrsrfv     |
| IP100304596 | 68   | 74   | cdc2->PKA+cdc2                           |                                          |                        | 4841   | NONO      | kpgqekgTsrfrsrfv       |
| IP100304596 | 198  | 196  | unsp+cdc2->cdc2                          | unsp+cdc2->cdc2                          |                        | 4841   | NONO      | rspqgivesGkpaarkald    |
| IP100304612 | 191  | 193  | ->PKC                                    |                                          |                        | 23521  | RPL13A    | knvekkidkyTevlthglv    |
| IP100304740 | 475  | 477  | PKA->                                    | PKA->                                    |                        | 6453   | ITSN1     | divvikakkTefelealnd    |
| IP100304814 | 47   | 40   | unsp+PKG->unsp+PKG+cdc2                  |                                          |                        | 2879   | GPX4      | asrddwrcarSmhfsakdid   |
| IP100304925 | 88   | 85   | PKC->                                    | PKC->                                    |                        | 3304   | HSPA1B    | grkfgdpvqGsdmnhwpfvi   |
| IP100304925 | 108  | 106  | unsp+PKC->unsp                           | unsp+PKC->unsp                           | Uniprot                | 3304   | HSPA1B    | ndgdpkpvqVsykgetafpy   |
| IP100304925 | 112  | 111  | PKC->                                    | PKC->DNAPK                               |                        | 3304   | HSPA1B    | pkvqvssygeTkaftypeiss  |
| IP100304925 | 246  | 254  | DNAPK->cdc2+DNAPK                        |                                          |                        | 3304   | HSPA1B    | efkrkksqgTskxavmr      |
| IP100304925 | 500  | 502  | PKA->                                    | PKA->                                    | PhosphoSite            | 3304   | HSPA1B    | dkstkaknTltdngkrsk     |
| IP100305144 | 217  | 216  |                                          | PKC->PKC+DNAPK                           |                        | 10078  | TSSCA     | sscggevrifTkvpgvyearh  |
| IP100305166 | 179  | 177  | unsp+PKC->                               | unsp+PKC->                               |                        | 6389   | SDHA      | kiyqrafqgqSlkfgkggah   |
| IP100305166 | 335  | 339  | PKC->                                    | PKC->PKC+cdc2                            |                        | 6389   | SDHA      | ryapvakdiaSdrvsvsrmlt  |
| IP100305166 | 498  | 492  | CKII->PKA+CKII                           |                                          |                        | 6389   | SDHA      | ppikpnageeSvmmldklrfa  |
| IP100305166 | 538  | 540  | cdc2+PKA->cdc2                           | cdc2+PKA->cdc2                           |                        | 6389   | SDHA      | svlqegcgkSlkylgdllkh   |
| IP100305166 | 541  | 540  |                                          | cdc2+PKA->ATM+cdc2+PKA                   |                        | 6389   | SDHA      | svlqegcgkSlkylgdllkh   |
| IP100305289 | 146  | 148  | cdc2->CKII+cdc2                          | cdc2->CKII+cdc2                          |                        | 3832   | KIF11     | rthqflekTdngetfsvkv    |
| IP100305374 | 300  | 304  | unsp+PKC->unsp                           | unsp+PKC->unsp                           |                        | 9984   | THO1      | shvfyakfSaxkmdlqsd     |
| IP100305545 | 128  | 124  | PKC->                                    | PKC->unsp                                |                        | 51163  | DBR1      | kyrvrggSGfkghdykr      |
| IP100306043 | 245  | 244  | PKC->PKC+DNAPK                           | PKC->ATM+PKC+DNAPK                       |                        | 51441  | YTHDF2    | pkpaswadiaSkpakkqplk   |
| IP100306048 | 427  | 426  | ->DNAPK                                  | ->DNAPK                                  |                        | 83858  | ATAD3B    | fkrkteeiSkdlratinaf    |
| IP100306048 | 427  | 432  | PKC->                                    | PKC->                                    |                        | 83858  | ATAD3B    | teiesklrdaTinaflyhmqq  |
| IP100306332 | 27   | 24   | PKC->                                    |                                          |                        | 6152   | RPL24     | ypghgrryarTdgkvqflina  |
| IP100306332 | 77   | 86   | unsp->unsp+PKA                           |                                          | Uniprot PhosphoSite    | 6152   | RPL24     | vkfqraitgaSladimakrnq  |
| IP100306332 | 93   | 86   | unsp->unsp+PKA                           | unsp->unsp+PKA                           | Uniprot PhosphoSite    | 6152   | RPL24     | vkfqraitgaSladimakrnq  |
| IP100306369 | 586  | 583  | PKC->                                    |                                          |                        | 54888  | NSUN2     | nnsckmvrnTgikwcrnns    |
| IP100306430 | 116  | 112  | unsp+PKC+PKG->unsp+PKG+PKA               | unsp+PKC+PKG->unsp+PKG+PKA               |                        | 2115   | ETV1      | acsqepkfsYgkclnyvsa    |
| IP100306430 | 116  | 113  | unsp+EGFR->EGFR                          | unsp+EGFR->EGFR                          |                        | 2115   | ETV1      | csqepkfsYgkclnyvsa     |
| IP100306430 | 116  | 119  | unsp->                                   | unsp->                                   |                        | 2115   | ETV1      | kfsygeklYnvsaydqkqp    |
| IP100306642 | 201  | 200  | ->DNAPK                                  | ->DNAPK                                  |                        | 25879  | DCAF13    | preyiralnaTklervfakpf  |
| IP100306708 | 64   | 57   | unsp+PKA+RSK->unsp+cdc2+PKA+RSK          |                                          |                        | 55872  | PBK       | ylmkrsprglShspwavkinn  |
| IP100306708 | 64   | 59   | unsp+cdc2->                              | unsp+cdc2->                              | Uniprot PhosphoSite    | 55872  | PBK       | mkrspgrglShspwavkinn   |
| IP100306708 | 65   | 57   | unsp+PKA+RSK->unsp+cdc2+PKA+RSK          |                                          |                        | 55872  | PBK       | ylmkrsprglShspwavkinn  |
| IP100306708 | 65   | 59   |                                          | unsp+cdc2->unsp+GSK3+cdc2                |                        | 55872  | PBK       | mkrspgrglShspwavkinn   |
| IP100306723 | 695  | 700  | unsp->                                   | unsp->                                   |                        | 10153  | CEBP2     | gkqfknkdydSmpilfgaen   |
| IP100306749 | 793  | 794  | INSR+unsp->SRC                           | INSR+unsp->INSR                          |                        | 22950  | SLC4A1AP  | gdgrtnlnkYy            |
| IP100306959 | 101  | 104  | unsp+PKC->unsp                           |                                          |                        | 3855   | KRT7      | qiktlnnkfaSfdkvrflqg   |
| IP100306960 | 244  | 243  |                                          | ->ATM+DNAPK                              |                        | 4677   | NARS      | rhmnrigenmSkikarsmvt   |
| IP100307092 | 169  | 166  | unsp+PKA->PKA                            |                                          |                        | 3735   | KARS      | vagrihakraSggklifydlr  |
| IP100307162 | 173  | 169  | PKC->                                    | PKC->                                    |                        | 7414   | VCL       | tytknlpggmTkmakmidierq |
| IP100307162 | 1070 | 1067 | PKC+cdc2->cdc2                           | PKC+cdc2->cdc2                           |                        | 7414   | VCL       | ptistqlkiStvkatmlgrt   |
| IP100307162 | 1070 | 1068 | unsp+PKC->PKC                            | unsp+PKC->PKC                            |                        | 7414   | VCL       | tistqlklsTvkatmlgrtn   |
| IP100307162 | 1070 | 1072 |                                          | PKC->                                    |                        | 7414   | VCL       | qiklilstvkaTmlgrtnide  |
| IP100307246 | 289  | 284  | ->PKA                                    |                                          |                        | 1544   | CYP1A2    | dfdknsrvralpalkhskg    |
| IP100307259 | 84   | 80   | unsp->unsp+PKA                           |                                          |                        | 23317  | DNAJC13   | lfrksggkSedtkfstehr    |
| IP100307259 | 84   | 82   | PKC->                                    |                                          |                        | 23317  | DNAJC13   | frksgskkseTlksfthrt    |
| IP100307259 | 84   | 86   | unsp->                                   |                                          |                        | 23317  | DNAJC13   | sgkkssetklfStehrlltea  |
| IP100307259 | 84   | 87   | ->CKII                                   | ->CKII                                   |                        | 23317  | DNAJC13   | gkkssetklfTehrlltea    |
| IP100307259 | 84   | 91   | CKII->cdc2+CKII                          |                                          |                        | 23317  | DNAJC13   | etlksfthrtTelltairf    |
| IP100307659 | 240  | 234  |                                          | unsp+cdk5->unsp+GSK3+cdk5                | PhosphoSite            | 57332  | CBX8      | eylkrklldTpsagagkfpag  |
| IP100307659 | 240  | 236  | PKC->CKI+PKC                             | PKC->PKC+DNAPK                           |                        | 23770  | FKBP8     | psnkrtihaelSkilvkhaaqr |
| IP100307659 | 240  | 237  | unsp+PKG->unsp+PKG+PKA                   | unsp+PKG->unsp+PKG+DNAPK                 | Uniprot PhosphoSite    | 85403  | EAF1      | ppppmpfrapTkpvpvgktpsp |
| IP100307659 | 240  | 238  | unsp+PKA+RSK->unsp+PKA                   | unsp+PKA+RSK->unsp+PKA                   | Uniprot PhosphoSite    | 9877   | TC3H11A   | ansmktkrissSaetgkplsv  |
| IP100307659 | 240  | 239  | unsp+PKC->unsp                           | unsp+PKC->unsp                           | Uniprot PhosphoSite    | 9877   | TC3H11A   | smktrissSaetgkplsv     |
| IP100307659 | 240  | 240  | unsp+PKC->unsp                           | unsp+PKC->unsp                           | Uniprot PhosphoSite    | 9877   | TC3H11A   | mktrissSaetgkplsv      |
| IP100307659 | 240  | 241  | unsp+CKII->unsp+CKI+CKII                 | unsp+CKII->unsp+CKI+CKII                 | Uniprot PhosphoSite    | 9877   | TC3H11A   | ssastgkplsvSveddfekli  |
| IP100307659 | 240  | 242  | unsp+EGFR->EGFR                          | unsp+EGFR->EGFR                          |                        | 5928   | RBBP4     | aveevineeyKiwwktptfi   |
| IP100307659 | 240  | 243  | cdc2->                                   | cdc2->                                   |                        | 1727   | CYB5R3    | qrstpaitleSdtkyplrlr   |
| IP100307659 | 240  | 244  | unsp+PKC->                               | unsp+PKC->PKC                            |                        | 1727   | CYB5R3    | dlivkyfykdThnpkpaggm   |
| IP100307659 |      |      |                                          |                                          |                        |        |           |                        |

Table S3

|             |     |     |                                         |                                         |             |        |          |                         |
|-------------|-----|-----|-----------------------------------------|-----------------------------------------|-------------|--------|----------|-------------------------|
| IP100328798 | 110 | 105 | unsp->                                  | unsp->                                  |             | 283149 | BCL9L    | knpagvppfSllgklvkrdr    |
| IP100328798 | 110 | 106 | PKC->                                   | PKC->                                   |             | 283149 | BCL9L    | npagvppfSllgklvkrdr     |
| IP100328798 | 137 | 131 | ->PKA                                   | ->PKA                                   |             | 283149 | BCL9L    | sqeqreagtpSldeakevap    |
| IP100328798 | 137 | 134 | unsp->                                  | unsp->                                  |             | 283149 | BCL9L    | qreagtpsldeakevaprsk    |
| IP100328815 | 968 | 962 | ->PKA                                   | ->PKA                                   |             | 84196  | USP48    | kvrgelallvSanqtikelki   |
| IP100328815 | 968 | 966 | unsp+PKC-> unsp                         | unsp+PKC-> unsp                         |             | 84196  | USP48    | ekallvsnqTikelkiqinh    |
| IP100328918 | 33  | 34  |                                         |                                         |             | 84062  | DTNBP1   | sdksreakvkSktrpvflpk    |
| IP100328918 | 33  | 38  | PKC->                                   | PKC->                                   |             | 84062  | DTNBP1   | reakvkskrTvpfllpkysag   |
| IP100328918 | 35  | 34  | unsp+cdc2-> unsp+PKA+cdc2               | unsp+cdc2-> unsp+PKA+cdc2               |             | 84062  | DTNBP1   | sdksreakvkSktrpvflpk    |
| IP100328918 | 35  | 38  | PKC-> GSK3                              | unsp+cdc2-> unsp+cdc2+DNAPK             |             | 84062  | DTNBP1   | reakvkskrTvpfllpkysag   |
| IP100329132 | 233 | 238 | unsp+PKA+CKII-> PKC                     |                                         |             | 79969  | C6orf134 | aegdlkpyssSdreflkvave   |
| IP100329331 | 438 | 434 | PKC-> PKA                               | PKC->                                   |             | 7360   | UGP2     | ftptplvklvgSftkvqdylr   |
| IP100329331 | 438 | 435 | PKC-> PKA                               | PKC->                                   |             | 7360   | UGP2     | ptpvlkvlgSftkvqdyllr    |
| IP100329331 | 438 | 442 | EGFR->                                  |                                         |             | 7360   | UGP2     | lgssftkvqdyllrrfrespidm |
| IP100329338 | 8   | 6   | PKC-> cdc2                              | PKC->                                   |             | 5130   | PCYT1A   | -----mdaqcSakvnarkrrk   |
| IP100329389 | 210 | 213 | PKC->                                   |                                         |             | 6128   | RPL6     | isvnikpklTdayfkfkkklr   |
| IP100329389 | 239 | 240 | INSR+unsp-> unsp                        |                                         |             | 6128   | RPL6     | gefldtekekYeteqrkld     |
| IP100329512 | 8   | 6   | unsp+PKC->                              | unsp+PKC->                              |             | 6628   | SNRPB    | -----mtvgSkmlhdydr      |
| IP100329512 | 8   | 7   | unsp+PKC+PKA-> PKA                      | unsp+PKC+PKA-> unsp+PKA+DNAPK           |             | 6628   | SNRPB    | -----mtvgSkmlhdydr      |
| IP100329512 | 32  | 30  | unsp+PKC-> PKC                          | unsp+PKC-> PKC                          |             | 6628   | SNRPB    | ilgdgrifngTfkafdkhml    |
| IP100329528 | 701 | 697 | unsp+PKG-> unsp+PKG+PKA                 | unsp+PKG-> unsp+PKG+PKA                 |             | 9730   | VRPBP    | ncvcgpdnrlSsigkfhsftg   |
| IP100329528 | 701 | 698 | unsp+PKC-> PKA                          | unsp+PKC-> unsp+PKA                     |             | 9730   | VRPBP    | cvcgpdnrlSsigkfhsftg    |
| IP100329633 | 243 | 246 | unsp+p38MAPK-> unsp+cdk5+p38MAPK        |                                         |             | 6897   | TARS     | krclrnekvntTpttvyrcap   |
| IP100329633 | 243 | 248 | PKG->                                   |                                         |             | 6897   | TARS     | rlnekvnptTtvyrcapli     |
| IP100329633 | 306 | 301 | unsp+PKC->                              | unsp+PKC-> PKC                          |             | 6897   | TARS     | metlqirygSfpdpkmikew    |
| IP100329665 | 6   | 7   | unsp->                                  |                                         |             | 440689 | HIST2H2B | -----mpdpakSapapkgsgsk  |
| IP100329665 | 12  | 7   | unsp->                                  | unsp->                                  |             | 440689 | HIST2H2B | -----mpdpakSapapkgsgsk  |
| IP100329665 | 12  | 15  | unsp+PKC-> PKC                          | unsp+PKC-> PKC                          |             | 440689 | HIST2H2B | aksapapkgSkkavtkvqkl    |
| IP100329665 | 13  | 15  | unsp+PKC-> PKC                          |                                         | Uniprot     | 440689 | HIST2H2B | aksapapkgSkkavtkvqkl    |
| IP100329665 | 16  | 15  | unsp+PKC-> unsp+PKC+PKA                 | unsp+PKC-> ATM+unsp+PKC+DNAPK           |             | 440689 | HIST2H2B | aksapapkgSkkavtkvqkl    |
| IP100329665 | 17  | 15  | unsp+PKC-> PKC+PKA                      | unsp+PKC-> PKC+PKA                      | Uniprot     | 440689 | HIST2H2B | aksapapkgSkkavtkvqkl    |
| IP100329665 | 21  | 15  | unsp+PKC-> unsp+PKC+PKA                 | unsp+PKC-> unsp+PKC+PKA                 | Uniprot     | 440689 | HIST2H2B | aksapapkgSkkavtkvqkl    |
| IP100329665 | 35  | 33  | unsp+PKC+PKG+PKA+RSK-> unsp+PKG+PKA+RSK | unsp+PKC+PKG+PKA+RSK-> unsp+PKG+PKA+RSK |             | 440689 | HIST2H2B | aksapapkgSkkavtkvqkl    |
| IP100329665 | 35  | 37  | INSR+unsp->                             | INSR+unsp->                             |             | 440689 | HIST2H2B | gkkrksrkeSsyvvylkvkl    |
| IP100329665 | 35  | 38  | unsp+PKC-> unsp                         | unsp+PKC-> unsp+PKC+cdc2                | PhosphoSite | 440689 | HIST2H2B | gkkrksrkeSsyvvylkvkl    |
| IP100329665 | 35  | 39  |                                         | unsp+PKC-> unsp+PKC+cdc2                |             | 440689 | HIST2H2B | gkkrksrkeSsyvvylkvkl    |
| IP100329665 | 47  | 53  |                                         | GSK3->                                  |             | 440689 | HIST2H2B | gkkrksrkeSsyvvylkvkl    |
| IP100329665 | 86  | 79  | ->cdc2                                  |                                         |             | 440689 | HIST2H2B | gkkrksrkeSsyvvylkvkl    |
| IP100329665 | 86  | 88  | PKG->                                   | PKG->                                   |             | 440689 | HIST2H2B | gkkrksrkeSsyvvylkvkl    |
| IP100329665 | 86  | 89  | unsp+PKC->                              | unsp+PKC-> PKC                          |             | 440689 | HIST2H2B | gkkrksrkeSsyvvylkvkl    |
| IP100329665 | 109 | 113 | unsp->                                  |                                         |             | 440689 | HIST2H2B | gkkrksrkeSsyvvylkvkl    |
| IP100329665 | 121 | 120 |                                         | ->ATM+DNAPK                             |             | 440689 | HIST2H2B | g                       |

Table S3

|             |      |      |                                     |                                     |        |          |                        |
|-------------|------|------|-------------------------------------|-------------------------------------|--------|----------|------------------------|
| IP100376005 | 77   | 78   |                                     | PKC->unsp+PKC                       | 1984   | EIF5A    | ckivemstskTgkhghakvhl  |
| IP100376005 | 97   | 95   | PKC->PKC+cdc2+CKII                  | PKC->PKC+CKII                       | 1984   | EIF5A    | kvhlgvldiFgkkyedipcs   |
| IP100376005 | 98   | 95   | PKC->PKC+CKII                       | PKC->PKC+CKII                       | 1984   | EIF5A    | kvhlgvldiFgkkyedipcs   |
| IP100376119 | 314  | 310  | CKII->PKA+CKII                      |                                     | 5567   | PRKACB   | sgkvrpshtSsdikdlmli    |
| IP100376119 | 314  | 311  | ->CKII                              |                                     | 5567   | PRKACB   | gkvrtpshSsdikdlmli     |
| IP100376379 | 181  | 177  | unsp+PKC->unsp                      |                                     | 374454 | KRT77    | qimvlnnkfaSfidkvrflq   |
| IP100376798 | 52   | 47   | unsp+cdk5+p38MAPK->unsp+p38MAPK     |                                     | 6135   | RLP11    | akvleqgtPvTpfskarytv   |
| IP100376798 | 52   | 51   | PKC->                               | Uniprot PhosphoSite                 | 6135   | RLP11    | eqlgtgtpvTfSkarytvrsfg |
| IP100376798 | 159  | 158  | unsp+PKG+PKA+RSK->unsp+PKA+RSK      |                                     | 6135   | RLP11    | tgicagkhrfSkeeamrwrffq |
| IP100376976 | 182  | 175  |                                     | PKC->DNAPK                          | 50807  | ASAP1    | pfdkawdkyefTfkiekrekra |
| IP100376976 | 182  | 178  | PKC+PKG+CKII->CKII                  | PKC->CKI+PKC                        | 50807  | ASAP1    | kawdkyefTfkiekrekra    |
| IP100377245 | 1974 | 1979 | unsp+PKA+RSK->PKA+RSK               | PKC+PKG+CKII->PKG+CKII              | 50807  | ASAP1    | unsp+PKA+RSK->PKA+RSK  |
| IP100377245 | 2196 | 2187 | unsp+PKG+PKA->unsp+PKG+cdc2+PKA     |                                     | 8085   | MLL2     | pdpfkrcpSldlnlavpes    |
| IP100377245 | 2883 | 2877 | ->PKA                               |                                     | 8085   | MLL2     | pyssrpsqSdrfpalpkp     |
| IP100377245 | 2883 | 2887 | unsp->                              | unsp->unsp+cdc2                     | 8085   | MLL2     | plpewappaSglglkpgqs    |
| IP100377245 | 4244 | 4235 | unsp->unsp+cdc2                     |                                     | 8085   | MLL2     | slglglkpgqSnmgsrdtrmg  |
| IP100377245 | 4244 | 4247 | unsp+PKC+p38MAPK->unsp+GSK3+p38MAPK |                                     | 8085   | MLL2     | gleglkgtpSnkedaarfp    |
| IP100377245 | 4504 | 4508 |                                     | PKA->                               | 8085   | MLL2     | kvtdwagkgSevsvmltvs    |
| IP100382470 | 191  | 187  | PKC->                               | PKC->                               | 3320   | HSP90AA1 | aldkiryestDpskldsgkie  |
| IP100382470 | 191  | 190  |                                     | unsp->ATM+unsp+DNAPK                | 3320   | HSP90AA1 | kiryestDpskldsgkelhi   |
| IP100382470 | 222  | 216  | CKI->                               | CKI->                               | 3320   | HSP90AA1 | kdrtitvdTgimtkadi      |
| IP100382470 | 222  | 221  | ->PKA                               | ->DNAPK                             | 3320   | HSP90AA1 | tivdtgimTkadlinlgt     |
| IP100382470 | 414  | 406  | unsp+EGFR->unsp                     | unsp+EGFR->unsp                     | 3320   | HSP90AA1 | kxkikxkikdSldmpeklk    |
| IP100382470 | 416  | 415  |                                     | ->DNAPK                             | 3320   | HSP90AA1 | kyiddeelnkTkpwtmrpdd   |
| IP100382470 | 436  | 437  | CKII->CKI+PKA+CKII                  | CKII->PKA+CKII                      | 3320   | HSP90AA1 | tneeygyfkySltndwedhla  |
| IP100382470 | 529  | 528  |                                     | ->ATM+DNAPK                         | 3320   | HSP90AA1 | insiremlqgSkilivirkn   |
| IP100382470 | 558  | 556  | unsp+EGFR->unsp                     | unsp+EGFR->unsp                     | 3320   | HSP90AA1 | felaedenYkfyqefskn     |
| IP100382470 | 558  | 560  | ->unsp                              | ->unsp+EGFR                         | 3320   | HSP90AA1 | aedkenykyfYeqfknkldg   |
| IP100382470 | 565  | 564  |                                     | ->DNAPK                             | 3320   | HSP90AA1 | enykkyfYeqfSknlkijhed  |
| IP100382470 | 580  | 575  | unsp+cdc2+DNAPK->cdc2+DNAPK         | unsp+cdc2+DNAPK->cdc2+DNAPK         | 3320   | HSP90AA1 | kniklghedSgnrkksell    |
| IP100382470 | 580  | 582  | PKA->                               | ->DNAPK                             | 3320   | HSP90AA1 | hedsgnrnkSellyrytsas   |
| IP100382470 | 580  | 588  | ->INSR                              | PKA->                               | 3320   | HSP90AA1 | rkksellyrytsasgdemvys  |
| IP100382470 | 600  | 592  |                                     | unsp+cdc2+CKII->unsp+CKII           | 3320   | HSP90AA1 | sellryrytsasgdemvysldy |
| IP100382470 | 600  | 598  | unsp->unsp+CKII+cdc2                |                                     | 3320   | HSP90AA1 | ytasagdemvysldyctrmke  |
| IP100382470 | 600  | 604  | PKC->                               | PKC->                               | 3320   | HSP90AA1 | demvysldyctrmkenqkhy   |
| IP100382470 | 611  | 614  | unsp->                              | unsp->                              | 3320   | HSP90AA1 | trmkenqkhyYitgetkdq    |
| IP100382470 | 611  | 615  | INSR->                              |                                     | 3320   | HSP90AA1 | rmkenqkhyYitgetkdq     |
| IP100382470 | 668  | 665  | PKC->PKC+PKA                        | PKC->PKC+PKA                        | 3320   | HSP90AA1 | ikefegktvSvtkeglelpe   |
| IP100382470 | 668  | 667  |                                     | ->ATM+DNAPK                         | 3320   | HSP90AA1 | efegktvsvTkeglepede    |
| IP100382470 | 707  | 711  | PKC->                               |                                     | 3320   | HSP90AA1 | ekkevkvsvSnrlytsppci   |
| IP100382470 | 753  | 749  | ->INSR                              |                                     | 3320   | HSP90AA1 | galrddnsmgTmaakkhlein  |
| IP100383046 | 36   | 37   | unsp+cdc5->unsp+cdc5+p38MAPK        | unsp+cdc5->unsp+cdc5+p38MAPK        | 134147 | CMBL     | vehikayvtKSpvdagxaviv  |
| IP100383105 | 490  | 488  |                                     | unsp+PKC->unsp                      | 80205  | CHD9     | hlclqrppssKsksdsgtyt   |
| IP100383105 | 490  | 494  | unsp+PKC->unsp                      |                                     | 80205  | CHD9     | qpssksdsgSgtytklqntq   |
| IP100383105 | 499  | 491  | unsp->unsp+PKA                      |                                     | 80205  | CHD9     | lqrqpssksSdsgtytklq    |
| IP100383105 | 499  | 494  | unsp+PKC->unsp+PKA                  | unsp+PKC->unsp+PKC+PKA              | 80205  | CHD9     | qpssksdsgSgtytklqntq   |
| IP100383105 | 499  | 496  | PKC->                               | PKC->                               | 80205  | CHD9     | psksksdsgSgtytklqntq   |
| IP100383105 | 499  | 498  |                                     | PKC->ATM+PKC                        | 80205  | CHD9     | ssksdsgstyTklqntqvrvm  |
| IP100383163 | 81   | 76   | unsp->unsp+PKA                      |                                     | 29087  | THY1     | rlekgydvktSiedkaaprk   |
| IP100384028 | 657  | 650  | ->cdc2                              |                                     | 10914  | PAPOLA   | ppprssgnaaTsgnaaktpt   |
| IP100384028 | 657  | 656  | PKC->                               | PKC->                               | 10914  | PAPOLA   | gnatsgnaaTkiptpivgvyk  |
| IP100384028 | 657  | 660  | ->cdc5                              | ->cdc5+p38MAPK                      | 10914  | PAPOLA   | tsnaatkipTpiqvkrts     |
| IP100384028 | 666  | 668  | PKC+PKG->PKC                        | PKC+PKG->                           | 10914  | PAPOLA   | iptpivgkvrTssphkeesp   |
| IP100384028 | 752  | 754  |                                     | PKC+PKA->PKA                        | 10914  | PAPOLA   | panpipviknSiklrnr---   |
| IP100384028 | 756  | 754  | PKC+PKA->PKA                        | PKC+PKA->PKA                        | 10914  | PAPOLA   | panpipviknSiklrnr---   |
| IP100384202 | 552  | 547  | unsp->unsp+PKA                      |                                     | 221037 | JMJD1C   | mdpnvdsdkhSianakflta   |
| IP100384202 | 552  | 556  | unsp+PKC->PKC                       |                                     | 221037 | JMJD1C   | hsianakfltaKkdsdqsw    |
| IP100384428 | 257  | 262  | PKG+PKA->PKA                        |                                     | 670    | BPHL     | adfhikvlygSrlimpeqkh   |
| IP100384456 | 70   | 79   |                                     | unsp+PKG->unsp+PKG+cdc2+PKA         | 2956   | MSH6     | aknrlnglrSvapaasqtsa   |
| IP100384456 | 504  | 503  | unsp->unsp+PKA                      | unsp->ATM+unsp+DNAPK                | 2956   | MSH6     | earcrmahisSkydvrvrei   |
| IP100384471 | 368  | 371  | unsp+CKI->CKI                       |                                     | 23774  | BRD1     | ymkmepvkelTgggtftsvrk  |
| IP100384471 | 418  | 415  | unsp+PKG+cdc2+PKA+RSK->unsp+PKG+PKA | unsp+PKG+cdc2+PKA+RSK->unsp+PKG+PKA | 23774  | BRD1     | emkngvcrkeSsvktvtrskv  |
| IP100384471 | 418  | 416  | unsp+PKC->                          | unsp+PKC->                          | 23774  | BRD1     | mknvgvrkesSvktvtrskv   |
| IP100384471 | 418  | 422  | PKG->                               | PKG->                               | 23774  | BRD1     | rkessvktvSksvkrkakk    |
| IP100384471 | 519  | 524  | unsp->unsp+EGFR                     |                                     | 23774  | BRD1     | emkaakekklYwqrldher    |
| IP100384471 | 521  | 524  | unsp->                              |                                     | 23774  | BRD1     | emkaakekklYwqrldher    |
| IP100384471 | 587  | 582  | unsp+PKC+PKA+RSK->unsp+PKA+RSK      | unsp+PKC+PKA+RSK->unsp+PKA+RSK      | 23774  | BRD1     | epasdnmstSvfkfcskgs    |
| IP100384707 | 486  | 479  | ->cdc2                              |                                     | 124454 | EARS2    | lkksleglegTKysnmklrl   |
| IP100384707 | 486  | 482  | ->PKA                               |                                     | 124454 | EARS2    | lseglegtkySnmklrml     |
| IP100384857 | 8    | 3    | PKC->                               | PKC->                               | 51155  | HN1      | -----mtTtttkgvdnp      |
| IP100384857 | 8    | 4    | PKC->                               |                                     | 51155  | HN1      | -----mtTtttkgvdnp      |
| IP100384857 | 8    | 5    | unsp+PKC->                          | unsp+PKC->                          | 51155  | HN1      | -----mtTtttkgvdnp      |
| IP100384857 | 8    | 6    | unsp+CKI+PKC->CKI                   |                                     | 51155  | HN1      | -----mtTtttkgvdnp      |
| IP100384972 | 104  | 103  |                                     | unsp+CKI+PKC->                      | 284058 | KIAA1267 | kesklglvTfSkqtkvshpl   |
| IP100384972 | 104  | 106  |                                     | ->ATM+DNAPK                         | 284058 | KIAA1267 | klqvgfSkqtkvshpl       |
| IP100384972 | 180  | 173  | unsp->unsp+cdc2                     | PKC->PKC+CaM-II                     | 284058 | KIAA1267 | kssthsdndnSlingkrall   |
| IP100384972 | 180  | 175  |                                     | CKI+cdc2->cdc2                      | 284058 | KIAA1267 | sthsdndnSlingkrall     |
| IP100384972 | 180  | 184  |                                     | unsp+PKA->unsp                      | 284058 | KIAA1267 | tslmgkralTsalhgqemg    |
| IP100385042 | 522  | 518  | PKC->                               | PKC->CKII                           | 23560  | GTBPB4   | mprtakvqvrTvelekmsrlg  |
| IP100385042 | 522  | 526  | PKA->                               |                                     | 23560  | GTBPB4   | qrvtlekemsrlgvdmdkldd  |
| IP100385055 | 890  | 888  | unsp+PKC->PKC                       | unsp+PKC->PKC                       | 1496   | CTNNA2   | vtvkasyvasTkyqkvvgta   |
| IP100385055 | 890  | 889  |                                     | unsp+PKC->unsp+PKG+DNAPK            | 1496   | CTNNA2   | ltvkasyvasTkyqkvvgta   |
| IP100385055 | 890  | 891  | unsp+EGFR->unsp                     | unsp+EGFR->INSR+unsp+EGFR           | 1496   | CTNNA2   | vkasyvastkyqkvvgta     |
| IP100385267 | 163  | 167  | unsp+PKC->                          | unsp+PKC+PKG->unsp+PKC              | 6734   | SRPR     | gekpkkekknSkkkaakqegs  |
| IP100385267 | 169  | 167  | unsp+PKC+PKG->                      | unsp+PKC+PKG->                      | 6734   | SRPR     | gekpkkekknSkkkaakqegs  |
| IP100385267 | 170  | 167  | unsp+PKC+PKG->unsp+PKG              |                                     | 6734   | SRPR     | gekpkkekknSkkkaakqegs  |
| IP100385449 | 570  | 574  | unsp+PKC->PKC                       |                                     | 6734   | SRPR     | ekvscikglmTkhpakrlqg   |
| IP100386122 | 140  | 138  | PKC->                               | PKC->                               | 25843  | MOBK13   | tdlgaacInSnkyfsvrsvi   |
| IP100386189 | 34   | 38   | PKC->                               |                                     | 80155  | NAA15    | nglkfckqilSnkpfahget   |
| IP100386189 | 262  | 260  | EGFR->                              |                                     | 80155  | NAA15    | lqernpenwaYyglekalp    |
| IP100386189 | 735  | 732  | PKC->                               | PKC->                               | 80155  | NAA15    | eskdlsdtvrTvlqemnrif   |
| IP100386189 | 756  | 753  | PKC->                               |                                     | 80155  | NAA15    | gatpnkfnfTfkmssdsip    |
| IP100386189 | 756  | 761  | PKA->                               |                                     | 80155  | NAA15    | netfkmssSghrfaakm      |
| IP100386448 | 221  | 229  | ->cdc2                              |                                     | 5970   | REL      | vkqedlevyTfpgweargsf   |
| IP100386448 | 310  | 316  | unsp+cdc5->unsp                     | unsp+cdc5->unsp                     | 5970   | REL      | yettfksimkSfsgptdrrp   |
| IP100386448 | 314  | 311  | PKC->                               | PKC->                               | 5970   | REL      | krkrtyetfSimkksfsgp    |
| IP100386448 | 314  | 316  | unsp+cdc5->unsp+cdc5+p38MAPK        |                                     | 5970   | REL      | yettfksimkSfsgptdrrp   |
| IP100386448 | 314  | 319  | unsp->unsp+CKI                      |                                     | 5970   | REL      | fkimkksfSfsgptdrrp     |
| IP100386448 | 315  | 311  | PKC->                               | PKC->                               | 5970   | REL      | krkrtyetfSimkksfsgp    |
| IP100386448 | 315  | 316  | unsp+cdc5->unsp+p38MAPK             | unsp+cdc5->unsp+cdc5+p38MAPK        | 5970   | REL      | yettfksimkSfsgptdrrp   |
| IP100386603 | 36   | 34   | unsp+PKC->                          | unsp->unsp+CKI                      | 5970   | REL      | fkimkksfSfsgptdrrp     |
| IP100386803 | 128  | 129  | unsp->CKI                           | unsp->                              | 3927   | LASP1    | nikyheefkSrmgsgsgem    |
| IP100386803 | 128  | 134  | unsp->unsp+PKA                      |                                     | 3927   | LASP1    | eeefksrmgSgsgmeper     |
| IP100386998 | 36   | 31   | PKC->                               |                                     | 641522 | ARL17B   | liilsdtagTilyiklge     |
| IP100387159 | 181  | 176  | CKI+PKC->PKC                        | CKI+PKC->PKC                        | 54556  | ING3     | fkseallstTsdakentlg    |
| IP100387159 | 181  | 177  | PKC->                               | PKC->                               | 54556  | ING3     | kseallstTsdakentlg     |
| IP100387159 | 181  | 180  | unsp+CKI->unsp+CKI+DNAPK            | unsp+CKI->ATM+unsp+CKI+DNAPK        | 54556  | ING3     | allstTsdakentlgcrn     |
| IP100394926 | 286  | 284  |                                     | unsp+PKC->                          | 10714  | POLD3    | klatpagikSkkkaepkvql   |
| IP100394926 | 286  | 285  |                                     | unsp+PKC+PKA->ATM+unsp+PKC+DNAPK    | 10714  | POLD3    | latpagikSkkkaepkvql    |
| IP100394926 | 287  | 285  | unsp+PKC+PKA->unsp+PKA              | unsp+PKC+PKA->unsp+PKA              | 10714  | POLD3    | latpagikSkkkaepkvql    |
| IP100394926 | 302  | 307  | unsp+PKC+CKII->unsp+CKII            | unsp+PKC+CKII->unsp+CKII            | 10714  | POLD3    | ekkrgrvralSddetetenm   |
| IP100395337 | 294  | 290  |                                     | cdc2->unsp+cdc2                     | 81608  | FIPL1    | qtsastarkanSvsgwdqrgy  |
| IP100395337 | 294  | 291  | unsp+PKC->PKC                       |                                     | 81608  | FIPL1    | tsastarkanSvsgwdqrgy   |
| IP100395627 | 19   | 21   | unsp+PKC->PKC                       | unsp+PKC->unsp                      | 27101  | CACYBP   | eevkvlekaTrkrvrdalta   |
| IP100395627 | 85   | 76   | PKA->cdc2+PKA                       |                                     | 27101  | CACYBP   | pittgytkviSnygwdqskf   |
| IP100395627 | 85   | 83   | PKC->                               | PKC->                               | 27101  | CACYBP   | vkisnygwdqSdskfviyit   |
| IP100395627 | 85   | 90   | INSR+EGFR->EGFR                     | INSR+EGFR->INSR                     | 27101  | CACYBP   | wdqskfviyitTgtvqhpq    |
| IP100395627 | 118  | 124  | cdc2->PKA+cdc2                      |                                     | 27101  | CACYBP   | dlivkningsSsymvnrllk   |
| IP100395627 | 134  | 141  |                                     | unsp+PKC->unsp+CKI+PKC              | 27101  | CACYBP   | nlkpsivegSskkvttdtvl   |
| IP100395627 | 134  | 142  | unsp+PKC->unsp+PKC+cdc2             |                                     | 27101  | CACYBP   | llkpsivegSskkvttdtvl   |
| IP100395865 | 4    | 3    |                                     | ->ATM+DNAPK                         | 5931   | RBBP7    | -----maSkemfedtvee     |
| IP100395865 | 21   | 20   | unsp->unsp+EGFR                     | unsp->unsp+EGFR                     | 5931   | RBBP7    | teevrineeYkiwknntpl    |
| IP100396015 | 1371 | 1365 | unsp+PKC+PKG->unsp+PKC+PKG+PKA      | unsp+PKC+PKG->unsp+PKC+PKG+PKA      | 31     | ACACA    | tvdghirTfTvaqdkfrk     |
| IP100396015 | 1617 | 1612 | unsp+cdc2->unsp+p38MAPK             | unsp+cdc2->unsp+p38MAPK             | 31     | ACACA    | qgplhgmIntPyvtkdlqsls  |
| IP100396015 | 1617 | 1614 | unsp->unsp+EGFR                     | unsp->unsp+EGFR                     | 31     | ACACA    | plhgmIntPyvtkdlqsls    |
| IP100396015 | 1617 | 1616 |                                     | ->ATM                               | 31     | ACACA    | hgmIntpyvtkdlqsls      |
| IP100396015 | 1617 | 1622 | unsp+PKC+cdc2->PKC+cdc2             | unsp+PKC+cdc2->PKC+cdc2             | 31     | ACACA    | tpyvtkdlqsls           |

Table S3

|             |      |      |                                                    |                                        |  |  |  |  |        |                               |                        |
|-------------|------|------|----------------------------------------------------|----------------------------------------|--|--|--|--|--------|-------------------------------|------------------------|
| IP00396089  | 85   | 87   | unsp->CKII->CKII                                   |                                        |  |  |  |  | 8315   | BRAP                          | mksnpdelktTveerksesae  |
| IP00396154  | 124  | 122  | unsp+PKC+PKG+PKA-> PKG+PKA                         | unsp+PKC+PKG+PKA-> PKG+PKA             |  |  |  |  | 51105  | PHF20L1                       | cdkppgqrSakryydkewl    |
| IP00396154  | 124  | 127  | INSR->                                             | INSR->                                 |  |  |  |  | 51105  | PHF20L1                       | pggrwsakryYdkewlningmr |
| IP00396154  | 296  | 294  | unsp->CKII                                         | unsp->CKII                             |  |  |  |  | 51105  | PHF20L1                       | hmrsksqlyYsakehgmpekn  |
| IP00396174  | 23   | 15   | INSR->                                             | INSR->                                 |  |  |  |  | 55246  | CCDC25                        | ftssvnsslaYtymgdkdyke  |
| IP00396258  | 321  | 319  | unsp->                                             | unsp->                                 |  |  |  |  | 587    | BCAT2                         | gefrvvertlTmkqlralee   |
| IP00396258  | 377  | 381  | unsp->                                             | unsp->                                 |  |  |  |  | 587    | BCAT2                         | rfkelkeiqYgiraehwmfp   |
| IP00396329  | 47   | 44   | PKC->                                              | PKC->                                  |  |  |  |  | 84154  | RP2                           | mlkkggnataTvtklvdvya   |
| IP00396329  | 47   | 46   | PKC->                                              | PKC->                                  |  |  |  |  | 84154  | RP2                           | ikgggnatavTvtklvdvya   |
| IP00396329  | 56   | 53   | unsp->                                             | unsp->                                 |  |  |  |  | 84154  | RP2                           | atvtklvdvYalkkygvy     |
| IP00396341  | 848  | 847  | cdc2->cdc2+DNAPK                                   | cdc2->cdc2+DNAPK                       |  |  |  |  | 151050 | C2orf67                       | eqarwslwecSkwhrmsray   |
| IP00396341  | 859  | 858  | unsp+cdc2+PKA->cdc2+PKA                            | unsp+cdc2+PKA->unsp+cdc2+DNAPK         |  |  |  |  | 151050 | C2orf67                       | kwhrmsraySknvegdlill   |
| IP00396378  | 3    | 4    | CKI->unsp+CKI                                      | CKI->unsp+CKI                          |  |  |  |  | 3181   | HNRNP2A8:-----mekTletpplerlk  |                        |
| IP00396378  | 112  | 110  | unsp+PKC->                                         | unsp+PKC->                             |  |  |  |  | 3181   | HNRNP2A8:eesgpgahvYtkkflvggik |                        |
| IP00396435  | 17   | 13   | unsp->                                             | unsp->                                 |  |  |  |  | 1665   | DHX15                         | krhrlidgedYpsgkkratgd  |
| IP00396435  | 17   | 15   | unsp+PKC->cdc2                                     | unsp+PKC->                             |  |  |  |  | 1665   | DHX15                         | hrldlgedypSgkkratgdtp  |
| IP00396435  | 17   | 22   | unsp+PKC->unsp                                     | unsp+PKC->unsp                         |  |  |  |  | 1665   | DHX15                         | dyssgkkratYgdkdrdrdr   |
| IP00396435  | 18   | 15   | unsp+PKC->unsp                                     | unsp+PKC->unsp                         |  |  |  |  | 1665   | DHX15                         | hrldlgedypSgkkratgdtp  |
| IP00396435  | 18   | 22   | unsp+PKC->unsp                                     | unsp+PKC->unsp                         |  |  |  |  | 1665   | DHX15                         | dyssgkkratYgdkdrdrdr   |
| IP00396435  | 488  | 486  | unsp+PKC->                                         | unsp+PKC->                             |  |  |  |  | 1665   | DHX15                         | trpgkcfrylYekayktetmd  |
| IP00396435  | 488  | 490  | ->unsp                                             | ->unsp                                 |  |  |  |  | 1665   | DHX15                         | kcfrylYekayktetmdqntyp |
| IP00396435  | 754  | 749  | PKC->                                              | PKC->                                  |  |  |  |  | 1665   | DHX15                         | fvlttknyirTctdikpewlv  |
| IP00396435  | 754  | 751  | PKC->                                              | PKC->                                  |  |  |  |  | 1665   | DHX15                         | lttknyirtCtdikpewlvki  |
| IP00396485  | 55   | 53   | PKC->                                              | PKC->                                  |  |  |  |  | 1915   | EEF1A1                        | ekeaaemgkSfkyavvldikae |
| IP00396485  | 55   | 56   | unsp->                                             | unsp->                                 |  |  |  |  | 1915   | EEF1A1                        | aaemgkSfkyavvldikae    |
| IP00396485  | 79   | 76   | cdc2->PKA+cdc2                                     | cdc2->PKA+cdc2                         |  |  |  |  | 1915   | EEF1A1                        | erengitidSlwfketsyky   |
| IP00396485  | 79   | 82   | unsp+PKC->PKC                                      | unsp+PKC->PKC                          |  |  |  |  | 1915   | EEF1A1                        | tdidwfketskytyutidia   |
| IP00396485  | 146  | 142  | PKC+cdc2->cdc2                                     | PKC+cdc2->cdc2                         |  |  |  |  | 1915   | EEF1A1                        | qtrahalaylTgvykigvgy   |
| IP00396485  | 172  | 175  | unsp->                                             | unsp->                                 |  |  |  |  | 1915   | EEF1A1                        | kryeeivkevStyikigynp   |
| IP00396485  | 179  | 177  | EGFR->                                             | EGFR->                                 |  |  |  |  | 1915   | EEF1A1                        | yeeivkevStyikigynpdt   |
| IP00396485  | 180  | 175  | unsp->                                             | unsp->                                 |  |  |  |  | 1915   | EEF1A1                        | kryeeivkevStyikigynp   |
| IP00396485  | 180  | 176  | PKC->                                              | PKC->                                  |  |  |  |  | 1915   | EEF1A1                        | ryeeivkevStyikigynpdt  |
| IP00396485  | 255  | 254  | INSR->                                             | INSR->                                 |  |  |  |  | 1915   | EEF1A1                        | kplrlpldvYykigigtvvp   |
| IP00396485  | 318  | 316  | unsp+PKC->unsp                                     | unsp+PKC->unsp                         |  |  |  |  | 1915   | EEF1A1                        | qngvfnmrvSvkdgrnrgva   |
| IP00396552  | 279  | 278  | INSR+unsp->unsp                                    | INSR+unsp->unsp+EGFR                   |  |  |  |  | 5777   | PTPN6                         | dprngkngrYknlpfdhsr    |
| IP00396552  | 279  | 287  | ->cdc2                                             | ->cdc2                                 |  |  |  |  | 5777   | PTPN6                         | nyknlpfdhsrNvlgdrsn    |
| IP00396577  | 1619 | 1617 | unsp+PKC->                                         | unsp+PKC->                             |  |  |  |  | 57492  | ARID1B                        | nspskpfplSsmkmoqvmvtp  |
| IP00396627  | 152  | 147  | EGFR->                                             | EGFR->                                 |  |  |  |  | 60528  | ELAC2                         | vlspgplekYlealikfsfp   |
| IP00397358  | 70   | 69   | unsp->                                             | unsp->ATM+DNAPK                        |  |  |  |  | 6232   | RPS27                         | ttypenmptlTddlhhpspe   |
| IP00397366  | 322  | 314  | ->PKA                                              | ->PKA                                  |  |  |  |  | 8496   | PP1B1P                        | evqkmkaveSImaaneekdr   |
| IP00397376  | 357  | 360  | unsp+CKII->CKII                                    | unsp+CKII->CKII                        |  |  |  |  | 79882  | ZC3H14                        | anknllikaiSeaaesvttk   |
| IP00397383  | 7    | 2    | PKC->PKA                                           | PKC->                                  |  |  |  |  | 23095  | KIF1B                         | -----mSgasvkavrvr      |
| IP00397383  | 7    | 5    | unsp+PKC+cdc2->cdc2                                | unsp+PKC+cdc2->cdc2                    |  |  |  |  | 23095  | KIF1B                         | -----msgaSvkavrvrpf    |
| IP003973751 | 253  | 256  | PKC->                                              | PKC+cdc2->cdc2                         |  |  |  |  | 55968  | NSFL1C                        | vppkgafArfTegegkgvsta  |
| IP00397740  | 466  | 461  | PKC+cdc2->cdc2                                     | unsp+PKC->unsp+PKC+DNAPK               |  |  |  |  | 388567 | ZNF749                        | shlvghkikiTadfskrddi   |
| IP00397740  | 466  | 465  | PKC->                                              | PKC->                                  |  |  |  |  | 388567 | ZNF749                        | qhkhkhtdaSksrdliqhr    |
| IP00397740  | 466  | 468  | PKG->                                              | CKII->                                 |  |  |  |  | 388567 | ZNF749                        | khtdafsksrdliqhihkn    |
| IP00397860  | 19   | 13   | CKII->                                             | cdc2+PKA->PKA+DNAPK                    |  |  |  |  | 1528   | CYB5A                         | eqsdvaykyYlteeiqkhnhs  |
| IP00397860  | 24   | 23   | cdc2+PKA->cdc2+PKA+DNAPK                           | PKC->                                  |  |  |  |  | 1528   | CYB5A                         | teeiqkhnhsKstwlilhik   |
| IP00397860  | 24   | 26   | PKC->                                              | PKC->                                  |  |  |  |  | 1528   | CYB5A                         | eiqkhnhsTwiilhikvdy    |
| IP00398406  | 249  | 253  | PKC->                                              | unsp+PKC->                             |  |  |  |  | 4205   | MEF2A                         | ganslgkvmptKspppppggn  |
| IP00398406  | 282  | 280  | unsp+PKC->                                         | unsp->unsp+DNAPK                       |  |  |  |  | 4205   | MEF2A                         | kplrlrvppSkggmmpplse   |
| IP00398406  | 282  | 281  | unsp->GSK3                                         | unsp+PKC->unsp                         |  |  |  |  | 4205   | MEF2A                         | kplrlrvppSkggmmpplse   |
| IP00398406  | 403  | 401  | unsp+PKC->cdc2                                     | ->PKC                                  |  |  |  |  | 4205   | MEF2A                         | ntnntnsgkspepprdm      |
| IP00398406  | 403  | 404  | unsp+PKC->                                         | unsp+GSK3+cdk5->unsp+GSK3+cdk5+p38MAPK |  |  |  |  | 4205   | MEF2A                         | ntnntnsgkspepprdm      |
| IP00398406  | 403  | 408  | unsp+GSK3+cdk5->unsp+GSK3+cdk5+p38MAPK             | unsp+PKA->unsp+cdc2+PKA                |  |  |  |  | 23369  | PUM2                          | pgaaekyrasSstsfssfs    |
| IP00398749  | 672  | 677  | unsp+PKA->unsp+cdc2                                | PKG+PKA->unsp+PKG+PKA                  |  |  |  |  | 7165   | PTD52L2                       | hissmparmnSatfksfdrv   |
| IP00399266  | 168  | 164  | PKG->                                              | PKG->                                  |  |  |  |  | 126669 | SHE                           | wkfeplnltVserakpggg    |
| IP00402077  | 50   | 51   | PKG->                                              | unsp+PKC->PKC                          |  |  |  |  | 126669 | SHE                           | kefplnltVserakpgggg    |
| IP00402077  | 50   | 53   | unsp+PKC->PKC                                      | PKC->                                  |  |  |  |  | 10249  | GLYAT                         | gaqmiqlekSirkspasik    |
| IP00402759  | 20   | 17   | PKC->                                              | unsp+PKC+PKA->unsp+PKC+PKA+DNAPK       |  |  |  |  | 10249  | GLYAT                         | lglmlekSrkSpasikvygt   |
| IP00402759  | 20   | 25   | unsp+PKC->PKC+cdc2                                 | unsp+PKC->unsp+PKC+cdc2                |  |  |  |  | 10249  | GLYAT                         | ekskrlsplaSikyvytflh   |
| IP00409671  | 25   | 22   | ->CKII                                             | ->CKI+CKII                             |  |  |  |  | 11325  | DDX42                         | rgfggfgaISagkkeepklp   |
| IP00409675  | 143  | 138  | unsp+PKA->PKA                                      | ->EGFR                                 |  |  |  |  | 10933  | MORF4L1                       | mrgaapggktSgllqknrvk   |
| IP00409698  | 862  | 861  | PKC->                                              | PKC->                                  |  |  |  |  | 30000  | TNPO2                         | spkdlrdmYfkihgkdgav    |
| IP00409717  | 293  | 291  | PKC->                                              | IntkrkvdlTekmhardtv                    |  |  |  |  | 1974   | E1F4A2                        | lntkrkvdlTekmhardtv    |
| IP00409750  | 232  | 231  | unsp+PKA->PKA                                      | cdc2->cdc2+ATM+PKA+DNAPK               |  |  |  |  | 55611  | OTUB1                         | ltsyglareSfhefhieg     |
| IP00410039  | 235  | 234  | cdc2->cdc2+DNAPK                                   | PKC->                                  |  |  |  |  | 51535  | PHL1N1                        | lletaleaaaSkwaekleks   |
| IP00410256  | 780  | 778  | PKC->                                              | PKC->                                  |  |  |  |  | 9150   | CTDP1                         | gpevrydsnTgklitgrag    |
| IP00410287  | 40   | 37   | PKC->                                              | PKA->                                  |  |  |  |  | 5662   | PKA4A1                        | ylgvtgvgYtgkvkvqkhe    |
| IP00410351  | 1428 | 1424 | PKC->                                              | alikhnvksilTgpklsrmp                   |  |  |  |  | 96111  | NCOR1                         | alikhnvksilTgpklsrmp   |
| IP00410351  | 1428 | 1427 | PKC->                                              | hvnksiltpgSkrmpmple                    |  |  |  |  | 96111  | NCOR1                         | hvnksiltpgSkrmpmple    |
| IP00410351  | 1428 | 1430 | unsp+PKA->unsp+PKC                                 | kslitgtsklSgrmpleivp                   |  |  |  |  | 96111  | NCOR1                         | kslitgtsklSgrmpleivp   |
| IP00410402  | 40   | 38   | PKC->                                              | 112714 TUBA3E                          |  |  |  |  | 112714 | TUBA3E                        | hgjapdgqmpSdtgiggddfs  |
| IP00410402  | 40   | 41   | ->CKI                                              | 112714 TUBA3E                          |  |  |  |  | 112714 | TUBA3E                        | qpdqgmpsdktTiggddfsnt  |
| IP00410402  | 60   | 56   | PKC->                                              | 112714 TUBA3E                          |  |  |  |  | 112714 | TUBA3E                        | dsdfnttfseTgagkhvprav  |
| IP00410496  | 102  | 103  | unsp+PKC->PKC                                      | 392490 FLJ44635                        |  |  |  |  | 392490 | FLJ44635                      | ynckidymkSikglkeleap   |
| IP00410616  | 154  | 162  | unsp+GSK3+cdk5+PKA+p38MAPK->unsp+GSK3+cdk5+p38MAPK | 252969 NEIL2                           |  |  |  |  | 252969 | NEIL2                         | ankrgdwrpdSprlvfhgg    |
| IP00410618  | 108  | 113  | PKC->PKC+cdc2                                      | 57456 KIAA1143                         |  |  |  |  | 57456  | KIAA1143                      | hpsdcysgYtasskkkqne    |
| IP00410699  | 211  | 205  | unsp+CKI->unsp                                     | 26132 SERP1B1                          |  |  |  |  | 26132  | SERP1B1                       | rhpsdcysgYtasskkkqne   |
| IP00410717  | 801  | 799  | unsp+cdk5+PKA->unsp+cdk5+PKA+RSK                   | 21326 POGZ                             |  |  |  |  | 21326  | POGZ                          | hmnhnvpkrSpkyalfkns    |
| IP00410717  | 801  | 802  | unsp->                                             | 21326 POGZ                             |  |  |  |  | 21326  | POGZ                          | hmnhnvpkrSpkyalfkns    |
| IP00410717  | 801  | 809  | unsp->unsp+cdc2                                    | 21326 POGZ                             |  |  |  |  | 21326  | POGZ                          | spkyalfknSvsgklacta    |
| IP00411303  | 342  | 340  | PKC->                                              | 221016 CDC7                            |  |  |  |  | 221016 | CDC7                          | kektkptntrNKavaktvkkk  |
| IP00411303  | 348  | 346  | unsp+PKC->PKC                                      | 221016 CDC7                            |  |  |  |  | 221016 | CDC7                          | tnnrtkkavTvkklldgkse   |
| IP00411356  | 8    | 4    | PKC->                                              | 21783 VPS4A                            |  |  |  |  | 21783  | VPS4A                         | -----mttStlqaidlvt     |
| IP00411356  | 8    | 5    | PKC->                                              | 21783 VPS4A                            |  |  |  |  | 21783  | VPS4A                         | -----mttStlqaidlvt     |
| IP00411359  | 363  | 359  | ->unsp                                             | 10051 SMC4                             |  |  |  |  | 10051  | SMC4                          | keineksnllSnmekakndv   |
| IP00411359  | 381  | 380  | ->PKA                                              | 10051 SMC4                             |  |  |  |  | 10051  | SMC4                          | kdtelkknllTfteenekf    |
| IP00411559  | 1037 | 1034 | unsp->INSR+unsp                                    | 10051 SMC4                             |  |  |  |  | 10051  | SMC4                          | haehnsklYwhkeiskil     |
| IP00411559  | 1037 | 1040 | PKA->                                              | 10051 SMC4                             |  |  |  |  | 10051  | SMC4                          | skikywhkeiSkilspiedn   |
| IP00411614  | 1127 | 1122 | unsp+PKC->PKC+PKA                                  | 11169 WDHD1                            |  |  |  |  | 11169  | WDHD1                         | pldfstnqklSafafake---  |
| IP00411706  | 10   | 7    | ->PKA                                              | 2098 ESD                               |  |  |  |  | 2098   | ESD                           | -----malkqiSnkcgfglk   |
| IP00411706  | 39   | 42   | unsp+PKC->unsp                                     | 2098 ESD                               |  |  |  |  | 2098   | ESD                           | favylppkaeTgkpcalyvl   |
| IP00411706  | 200  | 197  | PKC->                                              | 2098 ESD                               |  |  |  |  | 2098   | ESD                           | afsygltdqSkwakydathl   |
| IP00411706  | 200  | 205  | PKC->                                              | 2098 ESD                               |  |  |  |  | 2098   | ESD                           | dqskwameddaThlvkypsga  |
| IP00411937  | 505  | 502  | unsp+CKI->CKI                                      | 10528 NOP56                            |  |  |  |  | 10528  | NOP56                         | qngyqgmedpSkigkkkfsk   |
| IP00411937  | 505  | 504  | PKC+cdc2->CKI+PKC+cdc2                             | 10528 NOP56                            |  |  |  |  | 10528  | NOP56                         | ngmedpsipSkigkkkfsk    |
| IP00411937  | 507  | 500  | unsp->unsp+cdc2                                    | 10528 NOP56                            |  |  |  |  | 10528  | NOP56                         | qngmedpmedSisfskpkkk   |
| IP00411937  | 507  | 502  | unsp+CKI->                                         | 10528 NOP56                            |  |  |  |  | 10528  | NOP56                         | qngmedpsisfskpkkkfsk   |
| IP00411937  | 507  | 511  | unsp+PKG+PKA+RSK->unsp+RSK                         | 10528 NOP56                            |  |  |  |  | 10528  | NOP56                         | isfskpkkkSkeelmssdl    |
| IP00411937  | 507  | 513  | unsp+unsp+PKA                                      | 10528 NOP56                            |  |  |  |  | 10528  | NOP56                         | isfskpkkkSkeelmssdl    |
| IP00412404  | 220  | 223  | unsp+PKC->unsp+cdc2                                | 6832 SUPV3L1                           |  |  |  |  | 6832   | SUPV3L1                       | kythaiqyfSaksqvgcpl    |
| IP00412415  | 973  | 967  | unsp+PKC->unsp+PKC+cdc2                            | 11177 BAZ1A                            |  |  |  |  | 11177  | BAZ1A                         | grrsnadyvSqmcaeklel    |
| IP00412441  | 253  | 250  | ->CKII                                             | 23063 WAPAL                            |  |  |  |  | 23063  | WAPAL                         | asiscnklTsdkenvenhe    |
| IP00412441  | 253  | 251  | PKC+CKII->CKII                                     | 23063 WAPAL                            |  |  |  |  | 23063  | WAPAL                         | asiscnklTsdkenvenhe    |
| IP00412441  | 689  | 688  | PKC->                                              | 23063 WAPAL                            |  |  |  |  | 23063  | WAPAL                         | dyvfkappspSkvltktvpt   |
| IP00412441  | 689  | 693  | PKC->                                              | 23063 WAPAL                            |  |  |  |  | 23063  | WAPAL                         | appspkvltTvtptqpyad    |
| IP00412579  | 62   | 57   | unsp+PKC+RSK->unsp+PKC+PKA+RSK                     | 4736 RPL10A                            |  |  |  |  | 4736   | RPL10A                        | krfsgvtvirkTptpfksv    |
| IP00412579  | 62   | 64   | PKG+PKA->                                          | 4736 RPL10A                            |  |  |  |  | 4736   | RPL10A                        | rlkstprpKfSvclvgdgqhc  |
| IP00412607  | 43   | 42   | PKC->                                              | 11224 RPL35                            |  |  |  |  | 11224  | RPL35                         | rkvktggaSsklsirvrk     |
| IP00412607  | 43   | 45   | unsp+PKC->PKC                                      | 11224 RPL35                            |  |  |  |  | 11224  | RPL35                         | kvttgaaskiSpirvrksia   |
| IP00413022  | 482  | 476  | unsp+CKI+GSK3+p38MAPK->unsp+p38MAPK                | 54476 RNF216                           |  |  |  |  | 54476  | RNF216                        | sdaikw                 |

Table S3

|             |      |      |                                            |                                            |        |           |                        |
|-------------|------|------|--------------------------------------------|--------------------------------------------|--------|-----------|------------------------|
| IPI00413611 | 712  | 719  | ->cdc2                                     | ->cdc2                                     | 7150   | TOP1      | eenkqialgtSKlnlydprlt  |
| IPI00413627 | 406  | 402  | PKC->                                      | PKC->                                      | 8521   | GC1M      | tyashphqaySlpskskwdf   |
| IPI00413627 | 406  | 405  | PKC->                                      | PKC->ATM+PKC+DNAPK                         | 8521   | GC1M      | shphqyslpSlpskskwdf    |
| IPI00413627 | 406  | 408  | PKC->PKC+cdc2                              | unsp+PKC->unsp                             | 8521   | GC1M      | hqayslpskskwdf         |
| IPI00413627 | 409  | 405  | PKC->                                      | unsp+PKC->unsp                             | 8521   | GC1M      | shphqyslpSlpskskwdf    |
| IPI00413627 | 409  | 407  | unsp->                                     | unsp+PKC->ATM+unsp+DNAPK                   | 8521   | GC1M      | phqayslpskskwdf        |
| IPI00413627 | 409  | 408  | unsp+PKC->unsp                             | unsp+PKC->ATM+unsp+DNAPK                   | 8521   | GC1M      | hqayslpskskwdf         |
| IPI00413641 | 86   | 82   | PKC->                                      | unsp+PKC->ATM+unsp+DNAPK                   | 8521   | GC1M      | hqayslpskskwdf         |
| IPI00413641 | 95   | 98   | ->cdc2                                     | ->cdc2                                     | 231    | AKR1B1    | elfivsklwcTyhekglvka   |
| IPI00413641 | 263  | 264  | PKC->                                      | unsp->                                     | 231    | AKR1B1    | lvkgacqktlSdlldlydlly  |
| IPI00414320 | 348  | 346  | INSR->                                     | INSR->unsp+INSR                            | 231    | AKR1B1    | mqrnlvvpkSvtperiaenf   |
| IPI00414320 | 355  | 359  | PKC->                                      | CKI->CKI+cdc2                              | 311    | ANXA11    | qnrlisfktayGkdldkldks  |
| IPI00414320 | 579  | 577  | INSR->                                     | unsp->                                     | 311    | ANXA11    | diikdlseSgnfektial     |
| IPI00414320 | 579  | 582  | unsp->                                     | unsp->                                     | 311    | ANXA11    | lnseykrmngkslyhdsg     |
| IPI00414463 | 204  | 199  | unsp+CKII->unsp+PKA+CKII                   | unsp+EGFR->unsp                            | 51451  | LCMT1     | avigadlrldSeleeklkcn   |
| IPI00414676 | 275  | 276  | unsp+EGFR->unsp                            | unsp+EGFR->unsp                            | 3326   | HSP90AB1  | kkkttkikekYidqeelnkt   |
| IPI00414676 | 284  | 276  | unsp+EGFR->unsp                            | unsp+EGFR->unsp                            | 3326   | HSP90AB1  | kkkttkikekYidqeelnkt   |
| IPI00414676 | 306  | 307  | PKA+CKII->CKI+cdc2+PKA+CKII                | PKA+CKII->cdc2+PKA+CKII                    | 3326   | HSP90AB1  | teeyeyefkYsltdwedhla   |
| IPI00414676 | 399  | 398  | PKC->                                      | ->ATM+DNAPK                                | 3326   | HSP90AB1  | lnisermqqSkilcvirnk    |
| IPI00414676 | 435  | 430  | ->INSR                                     | ->INSR                                     | 3326   | HSP90AB1  | aedkenyikfYeafsknlkg   |
| IPI00414676 | 435  | 434  | unsp+PKC+PKG->                             | ->DNAPK                                    | 3326   | HSP90AB1  | enykkyeafSknlkgihed    |
| IPI00414676 | 481  | 479  | unsp+PKA->PKA                              | unsp+PKC+PKG->                             | 3326   | HSP90AB1  | lseyysrmkafYksiyvtge   |
| IPI00414676 | 481  | 482  | unsp+PKA->PKA                              | unsp+PKA->PKA                              | 3326   | HSP90AB1  | lvysrmketqkSiyvtgeske  |
| IPI00414676 | 481  | 484  | unsp->                                     | unsp->                                     | 3326   | HSP90AB1  | srmlketqkYiytgeskeq    |
| IPI00414676 | 573  | 579  | ->PKA                                      | unsp->                                     | 3326   | HSP90AB1  | eldkkvekvTisnrvsspc    |
| IPI00414676 | 623  | 619  | ->INSR                                     | ->INSR                                     | 3326   | HSP90AB1  | qalrldnstmgYmmakhhlein |
| IPI00418169 | 122  | 123  | ->p38MAPK                                  | ->p38MAPK                                  | 302    | ANXA2     | letvilgltlPaqydaselk   |
| IPI00418169 | 133  | 130  | PKC+cdc2->                                 | PKC+cdc2->                                 | 302    | ANXA2     | llktpaqydaSelkasnmglg  |
| IPI00418169 | 166  | 169  | INSR+unsp->                                | INSR+unsp->                                | 302    | ANXA2     | qeinrvyemYktldleklis   |
| IPI00418169 | 170  | 169  | INSR+unsp->unsp                            | INSR+unsp->INSR+unsp+EGFR                  | 302    | ANXA2     | qeinrvyemYktldleklis   |
| IPI00418169 | 170  | 171  | INSR+unsp->unsp                            | CKII->unsp+CKII                            | 302    | ANXA2     | inrvyemYktldleklis     |
| IPI00418169 | 175  | 169  | INSR+unsp->unsp                            | INSR+unsp->unsp                            | 302    | ANXA2     | qeinrvyemYktldleklis   |
| IPI00418169 | 175  | 171  | unsp+CKII->CKII                            | CKII->PKG+CKII                             | 302    | ANXA2     | inrvyemYktldleklis     |
| IPI00418169 | 175  | 179  | unsp+CKII->CKII                            | unsp+CKII->unsp+cdc2+CKII                  | 302    | ANXA2     | qeinrvyemYktldleklis   |
| IPI00418169 | 297  | 293  | unsp->INSR+unsp                            | unsp->INSR+unsp                            | 302    | ANXA2     | nkplyfadrlYdsmkgkgrtd  |
| IPI00418169 | 297  | 295  | unsp+PKC->                                 | unsp+PKC->                                 | 302    | ANXA2     | plyfadrlYdsmkgkgrtd    |
| IPI00418169 | 297  | 301  | unsp+PKC->PKC                              | unsp+PKC->PKC                              | 302    | ANXA2     | rydsmkgkgTrdkvlirnm    |
| IPI00418169 | 299  | 295  | unsp+PKC->unsp                             | unsp+PKC->unsp                             | 302    | ANXA2     | plyfadrlYdsmkgkgrtd    |
| IPI00418169 | 299  | 301  | unsp+PKC->PKC                              | unsp+PKC->PKC                              | 302    | ANXA2     | rydsmkgkgTrdkvlirnm    |
| IPI00418169 | 331  | 329  | INSR->                                     | INSR->unsp+INSR                            | 302    | ANXA2     | lkrsefkrYgkslyyiqg     |
| IPI00418169 | 331  | 332  | PKA->PKC+PKA                               | PKA->PKC+PKA                               | 302    | ANXA2     | rsefkrYgkslyyiqg       |
| IPI00418174 | 40   | 32   | PKG->PKG+PKA                               | PKG->PKG+PKA                               | 154791 | C7orf55   | saatgrpyrdTaaryrlvkaf  |
| IPI00418213 | 329  | 330  | PKG+CKII->CKII                             | PKG+CKII->CKII                             | 27342  | RABGEF1   | fieftkthkTgeiykqtkl    |
| IPI00418213 | 348  | 352  | unsp+PKA+RSK->unsp                         | unsp+PKA+RSK->unsp+RSK                     | 27342  | RABGEF1   | legmykrldSieeqsecaqr   |
| IPI00418316 | 440  | 439  | ->PKA                                      | ->ATM+DNAPK                                | 23613  | ZMYND8    | dmtaspkilmSkpvlsgtgr   |
| IPI00418316 | 440  | 444  | PKC->PKC+cdc2                              | unsp->unsp+cdc2                            | 23613  | ZMYND8    | pkilmskpvlsGgtgrnlis   |
| IPI00418316 | 440  | 447  | PKC->PKC+cdc2                              | unsp->unsp+cdc2                            | 23613  | ZMYND8    | lmskpvlsGgtgrnlis      |
| IPI00418471 | 445  | 436  | ->cdc2                                     | unsp->                                     | 7431   | VIM       | lnrlsdgkpvYkqkylrlit   |
| IPI00418471 | 445  | 441  | PKC->PKA                                   | PKC->PKC+PKA                               | 7431   | VIM       | lplvthnkrTlliktvetrd   |
| IPI00419235 | 137  | 138  | unsp->                                     | unsp->                                     | 2949   | GSTM5     | dpdfekllpYleelpkkl     |
| IPI00419237 | 221  | 225  | PKC->                                      | unsp->                                     | 51056  | LAP3      | faeiennkSasstevhir     |
| IPI00419237 | 221  | 227  | unsp->unsp+cdc2                            | unsp->unsp+cdc2                            | 51056  | LAP3      | eiieknkSasstevhirpk    |
| IPI00419249 | 57   | 56   | CKII->PKA                                  | CKII->ATM+CKII+DNAPK                       | 5684   | PSMA3     | vvgfveklvSklyeegnkr    |
| IPI00419249 | 206  | 199  | INSR+unsp->unsp                            | INSR+unsp->unsp                            | 5684   | PSMA3     | divkevakliYhvddevkda   |
| IPI00419249 | 238  | 243  | unsp+PKC+PKG+PKA+CKII->unsp+CKI+PKC+CKII   | unsp+PKC+PKG+PKA+CKII->unsp+PKG+PKA+CKII   | 5684   | PSMA3     | reeaeakyakeSikeedesddd |
| IPI00419258 | 12   | 14   | unsp+PKC+PKA->                             | unsp+PKC+PKA->                             | 3146   | HMBG1     | gdppkprgkmSyaafvvtcr   |
| IPI00419258 | 12   | 16   | unsp->                                     | unsp+PKC+PKA->                             | 3146   | HMBG1     | ekspkprgkmSyaafvvtcr   |
| IPI00419258 | 30   | 35   | unsp+PKC->                                 | unsp+PKC->                                 | 3146   | HMBG1     | eehkkhpdSaVnsefseks    |
| IPI00419258 | 43   | 39   | PKC->unsp                                  | PKC->unsp+PKC                              | 3146   | HMBG1     | kkhpdasvnlSefsksserw   |
| IPI00419258 | 43   | 42   | unsp+PKC->                                 | unsp+CKI+PKC->ATM+unsp+CKI+PKC+DNAPK       | 3146   | HMBG1     | pdasvnlSefsksserw      |
| IPI00419258 | 44   | 39   | PKC->                                      | unsp+CKI+PKC->CKI                          | 3146   | HMBG1     | pdasvnlSefsksserw      |
| IPI00419258 | 44   | 42   | unsp+CKI+PKC->CKI                          | unsp+CKI+PKC->CKI                          | 3146   | HMBG1     | pdasvnlSefsksserw      |
| IPI00419258 | 82   | 77   | PKC->                                      | unsp->                                     | 3146   | HMBG1     | dkaryeremTiyppkgettk   |
| IPI00419258 | 82   | 78   | unsp->INSR+unsp                            | unsp->INSR+unsp+EGFR                       | 3146   | HMBG1     | karyeremTiyppkgettk    |
| IPI00419258 | 146  | 144  | INSR+unsp->unsp                            | unsp->                                     | 3146   | HMBG1     | ntaaedkprYkkaaklk      |
| IPI00419258 | 154  | 155  | unsp->                                     | unsp->                                     | 3146   | HMBG1     | ekkaaklkYekdiayrak     |
| IPI00419258 | 157  | 155  | unsp->                                     | unsp->                                     | 3146   | HMBG1     | ekkaaklkYekdiayrak     |
| IPI00419273 | 641  | 642  | unsp+GSK3->unsp+GSK3+p38MAPK               | unsp+GSK3->unsp+p38MAPK                    | 8451   | CUL4A     | acqkarvlikSpkgvevdgd   |
| IPI00419373 | 134  | 137  | ->CKII                                     | ->CKII                                     | 220988 | HNRNP3    | kifvgikgedTeeynlrdyfe  |
| IPI00419373 | 148  | 145  | ->EGFR                                     | ->EGFR                                     | 220988 | HNRNP3    | edteeynlrdYfekygykiet  |
| IPI00419373 | 148  | 149  | unsp->                                     | unsp->INSR+unsp                            | 220988 | HNRNP3    | eynlrdYfekYgkietievme  |
| IPI00419373 | 148  | 154  | CKII->                                     | CKII->                                     | 220988 | HNRNP3    | dyfekygieTievmedrqsg   |
| IPI00419541 | 404  | 401  | PKC->                                      | PKC->                                      | 115361 | GBP4      | nhefqkvlidTiekkgdvl    |
| IPI00419585 | 44   | 40   | unsp+PKC+PKG+PKA+RSK->unsp+PKG+PKA+RSK     | unsp+PKC+PKG+PKA+RSK->unsp+PKG+PKA+RSK     | 5478   | PIPA      | pktaenfralTgekgyfygk   |
| IPI00419585 | 44   | 41   | PKC->                                      | unsp+PKC+PKG+PKA+RSK->unsp+PKG+PKA+RSK     | 5478   | PIPA      | pktaenfralTgekgyfygk   |
| IPI00419585 | 49   | 51   | PKA->PKC                                   | PKA->                                      | 5478   | PIPA      | tgekgyfygkSfthripdm    |
| IPI00419585 | 76   | 73   | PKC->                                      | unsp+PKC+PKG+PKA+RSK->unsp+PKG+PKA+RSK     | 5478   | PIPA      | qgddfrhngTgkisygkfk    |
| IPI00419585 | 76   | 79   | EGFR->                                     | unsp+PKC+PKG+PKA+RSK->unsp+PKG+PKA+RSK     | 5478   | PIPA      | rhnngtgekgyfygk        |
| IPI00419585 | 118  | 119  | unsp->                                     | unsp+PKC+PKG+PKA+RSK->unsp+PKG+PKA+RSK     | 5478   | PIPA      | gsqfctaktewldgkhvfv    |
| IPI00419643 | 221  | 215  | unsp->                                     | unsp+PKC+PKG+PKA+RSK->unsp+PKG+PKA+RSK     | 253558 | LCLAT1    | tdltenskrSnafeaknglq   |
| IPI00419833 | 6    | 7    | unsp->                                     | unsp+PKC+PKG+PKA+RSK->unsp+PKG+PKA+RSK     | 85236  | HIST1H2BK | -----mpepakSapapkksgsk |
| IPI00419833 | 12   | 7    | unsp->                                     | unsp+PKC+PKG+PKA+RSK->unsp+PKG+PKA+RSK     | 85236  | HIST1H2BK | -----mpepakSapapkksgsk |
| IPI00419833 | 12   | 15   | unsp+PKC->PKC                              | unsp+PKC->PKC                              | 85236  | HIST1H2BK | akspapkgkSkkavtkaaqk   |
| IPI00419833 | 13   | 15   | unsp+PKC->PKC                              | unsp+PKC->PKC                              | 85236  | HIST1H2BK | akspapkgkSkkavtkaaqk   |
| IPI00419833 | 16   | 15   | unsp+PKC->unsp+PKC+PKA                     | unsp+PKC->ATM+unsp+PKC+DNAPK               | 85236  | HIST1H2BK | akspapkgkSkkavtkaaqk   |
| IPI00419833 | 21   | 15   | unsp+PKC->unsp+PKC+PKA                     | unsp+PKC->unsp+PKC+PKA                     | 85236  | HIST1H2BK | akspapkgkSkkavtkaaqk   |
| IPI00419833 | 21   | 20   | unsp+PKC->unsp+PKC+PKA                     | unsp+PKC->unsp+PKC+PKA                     | 85236  | HIST1H2BK | akspapkgkSkkavtkaaqk   |
| IPI00419833 | 109  | 113  | unsp->                                     | unsp+PKC+PKG+PKA+RSK->unsp+PKG+PKA+RSK     | 85236  | HIST1H2BK | apkgkSkkavtkaaqk       |
| IPI00419844 | 428  | 426  | unsp+CKI+PKG->CKI+CKII                     | unsp+CKI+PKG->CKII                         | 10713  | USP39     | fmilakfngiTekeyktyken  |
| IPI00419844 | 428  | 433  | INSR->                                     | INSR->                                     | 10713  | USP39     | ngitekeyktYkenfkrtql   |
| IPI00419880 | 27   | 26   | unsp+PKC->unsp                             | unsp+PKC->unsp+DNAPK                       | 6189   | RPS3A     | gakkkvvdppSkdwvdydkap  |
| IPI00419880 | 249  | 246  | ->CKII                                     | unsp+PKC->unsp+DNAPK                       | 2189   | RPS3A     | essqkalgdelYekvradgy   |
| IPI00419884 | 10   | 12   | unsp+PKC+PKG->PKC                          | unsp+PKC+PKG->unsp+PKC                     | 440093 | H3F3C     | artktarkStgkaprkqla    |
| IPI00419884 | 15   | 11   | unsp+PKC+PKG->PKG+PKA                      | unsp+unsp+PKG                              | 440093 | H3F3C     | martktarkStgkaprkqla   |
| IPI00419884 | 15   | 12   | unsp+PKC+PKG->PKG+PKA                      | unsp+PKC+PKG->PKC+PKG                      | 440093 | H3F3C     | artktarkStgkaprkqla    |
| IPI00419919 | 33   | 29   | unsp->unsp+cdc2+PKA                        | unsp->unsp+EGFR                            | 387101 | RPL29P4   | ngikpsrqYeslkvgdpkf    |
| IPI00419919 | 33   | 31   | unsp->unsp+cdc2+PKA                        | unsp->unsp+cdc2+PKA                        | 387101 | RPL29P4   | ikkpsrqYeslkvgdpkf     |
| IPI00419928 | 110  | 105  | PKC+PKA->PKA                               | unsp+PKC->DNAPK                            | 339745 | SPOPL     | ksevrakfSlinakreetk    |
| IPI00419979 | 38   | 36   | unsp+PKC->                                 | unsp+PKC->DNAPK                            | 5062   | PAK2      | gkdpdlsanhlSkpplsvpee  |
| IPI00419979 | 38   | 42   | unsp->CKII                                 | unsp+PKC->DNAPK                            | 5062   | PAK2      | sanhlSkpplsvpee        |
| IPI00419979 | 128  | 132  | unsp->                                     | unsp+PKC->DNAPK                            | 5062   | PAK2      | avildvYkSntvqkyysf     |
| IPI00420014 | 1176 | 1173 | PKG->                                      | unsp+PKC->                                 | 23020  | SNRNP200  | elimpmkmgTihkyvhlfpk   |
| IPI00420065 | 378  | 376  | unsp+PKC->                                 | unsp+PKC->                                 | 84129  | ACAD11    | idttgqlvqTrkggevlivk   |
| IPI00420071 | 396  | 388  | unsp+PKC+PKG->unsp+PKC+PKG+PKA             | unsp+PKC+PKG->unsp+PKC+PKG+PKA             | 4135   | MAP6      | svqsskpkktSashkptrkak  |
| IPI00420071 | 396  | 394  | PKC+PKG->PKC                               | PKC+PKG->                                  | 4135   | MAP6      | pkktSashkptrkak        |
| IPI00430411 | 190  | 189  | PKC->                                      | PKC->                                      | 814    | CAMK4     | aplkiadglSkivehqlvmk   |
| IPI00430472 | 572  | 571  | ->cdc2                                     | unsp+cdc2+CKII->ATM+unsp+cdc2+CKII+DNAPK   | 10973  | ASC3      | vkeltgdmqlSkseiltqml   |
| IPI00430472 | 572  | 573  | EGFR->                                     | unsp+cdc2+CKII->ATM+unsp+cdc2+CKII+DNAPK   | 10973  | ASC3      | eltgdmqlSkseiltqml     |
| IPI00430803 | 134  | 132  | ->INSR                                     | unsp+cdc2+CKII->ATM+unsp+cdc2+CKII+DNAPK   | 391356 | C2orf79   | rryprkveekYklnafidiae  |
| IPI00430812 | 103  | 99   | ->EGFR                                     | ->INSR+EGFR                                | 7555   | CNBP      | epkreteqccYnqgghghar   |
| IPI00433834 | 77   | 74   | ->EGFR                                     | ->EGFR                                     | 6154   | RL26      | ggqgkvvvqYrkkyvviyer   |
| IPI00438229 | 266  | 269  | PKC->                                      | unsp+PKC+cdc2->cdc2                        | 10155  | TRIM28    | lvkrldkhaTlqkstvevrs   |
| IPI00438701 | 422  | 420  | unsp+PKC+cdc2->cdc2                        | unsp+PKC+cdc2->cdc2                        | 4152   | MBD1      | ssarhhlglpTltpktlattra |
| IPI00438701 | 422  | 424  | PKG+PKA->                                  | PKG+PKA->                                  | 4152   | MBD1      | rhlglptklTlatraqdph    |
| IPI00439194 | 109  | 104  | unsp+PKC->unsp+PKA                         | unsp+PKC->unsp                             | 53615  | MBD3      | dntalpvrtqTasifkqvtk   |
| IPI00439194 | 109  | 106  | PKC->PKA                                   | unsp+PKC->unsp                             | 53615  | MBD3      | ntalpvrtqTasifkqvtk    |
| IPI00439194 | 141  | 144  | PKA->                                      | unsp+PKC->unsp                             | 53615  | MBD3      | prqifweekYlgnafidiae   |
| IPI00439548 | 392  | 389  | unsp+PKC+PKG+PKA->PKG+PKA                  | unsp+PKC+PKG+PKA->unsp+CKI+PKG+PKA         | 54880  | BCOR      | vssefpaarlSngkykapeg   |
| IPI00439548 | 392  | 393  | unsp+EGFR->unsp                            | unsp+PKC+PKG+PKA->unsp+CKI+PKG+PKA         | 54880  | BCOR      | faarlSngkykapeg        |
| IPI00440484 | 1096 | 1089 | ATM+unsp+PKC+PKA+DNAPK->unsp+PKC+PKA+DNAPK | ATM+unsp+PKC+PKA+DNAPK->unsp+PKC+PKA+DNAPK | 5187   | PER1      | gtsasitrsqShtskyskyf   |
| IPI00440484 | 1096 | 1091 | unsp+PKC->unsp                             | unsp+PKC+PKA+DNAPK->unsp+PKC+PKA+DNAPK     | 5187   | PER1      | tsasitrsqShtskyskyf    |
| IPI00440484 | 1096 | 1092 | unsp+CKI+PKC->unsp+CKI                     | unsp+CKI+PKC->unsp+CKI                     | 5187   | PER1      | sasitrsqShtskyskyf     |
| IPI00440484 | 1096 | 1095 | unsp+cdc2->cdc2                            | unsp+cdc2->ATM+unsp+cdc2+DNAPK             | 5187   | PER1      | itrsqShtskyskyf        |
| IPI00440484 | 1096 | 1104 | unsp+CKII->unsp+cdc2+CKII                  | unsp+cdc2->ATM+unsp+cdc2+DNAPK             | 5187   | PER1      | tskyfsgdsSeaeagaarg    |
| IPI00440493 | 132  | 134  | PKG+PKA->                                  | PKG+PKA->                                  | 498    |           |                        |

Table S3

|             |      |      |                                     |                                           |  |  |  |  |  |        |           |                        |
|-------------|------|------|-------------------------------------|-------------------------------------------|--|--|--|--|--|--------|-----------|------------------------|
| IP100440493 | 239  | 243  | INSR->                              |                                           |  |  |  |  |  | 498    | ATPSA1    | ndgsdekkkl Cyyvaigqkr  |
| IP100440493 | 240  | 236  | unsp+PKC->unsp                      | unsp+PKC->unsp                            |  |  |  |  |  | 498    | ATPSA1    | inqkfrndgSdekklyciv    |
| IP100440493 | 240  | 243  | INSR->                              | INSR->                                    |  |  |  |  |  | 498    | ATPSA1    | ndgsdekkkl Cyyvaigqkr  |
| IP100440493 | 261  | 254  | PKA->cdc2+PKA                       |                                           |  |  |  |  |  | 498    | ATPSA1    | cyvaigqkrStvaqlvkrIt   |
| IP100440493 | 261  | 264  | unsp->                              |                                           |  |  |  |  |  | 498    | ATPSA1    | stvaqlvkrItDadamkytV   |
| IP100440493 | 427  | 423  | PKC->                               |                                           |  |  |  |  |  | 498    | ATPSA1    | svsrvsaaqTramkvagtm    |
| IP100440493 | 434  | 432  | PKC+cdc2->cdc2                      | PKC+cdc2->cdc2                            |  |  |  |  |  | 498    | ATPSA1    | qtramkvagTmklaaqyre    |
| IP100440493 | 498  | 502  | ->CKI                               | ->CKI                                     |  |  |  |  |  | 498    | ATPSA1    | vrgyldiepSkItkfenafl   |
| IP100440493 | 498  | 505  | unsp->unsp+cdc2                     |                                           |  |  |  |  |  | 498    | ATPSA1    | lyldiepskItkfenafl     |
| IP100440493 | 506  | 502  | ->PKA                               | ->unsp                                    |  |  |  |  |  | 498    | ATPSA1    | vrgyldiepSkItkfenafl   |
| IP100440493 | 506  | 505  | unsp->                              | unsp->                                    |  |  |  |  |  | 498    | ATPSA1    | lyldiepskItkfenaflsv   |
| IP100440493 | 539  | 536  | ->CKII                              |                                           |  |  |  |  |  | 498    | ATPSA1    | iradgkiseqSdalkievtN   |
| IP100440727 | 1114 | 1117 | unsp->GSK3                          | unsp->                                    |  |  |  |  |  | 23476  | BRD4      | lvvkeekihSpIresepfs    |
| IP100441473 | 200  | 199  | unsp->PKA                           | unsp->ATM+unsp+DNAPK                      |  |  |  |  |  | 10419  | PRMT5     | whnftrtcdySkriavaleg   |
| IP100442073 | 108  | 107  | unsp+PKC->unsp                      | unsp+PKC->unsp+DNAPK                      |  |  |  |  |  | 1465   | CSRP1     | ghrptnpnaSKfaqigisse   |
| IP100442073 | 112  | 107  | unsp+PKC->unsp                      |                                           |  |  |  |  |  | 1465   | CSRP1     | ghrptnpnaSKfaqigisse   |
| IP100442073 | 112  | 116  | unsp+PKC->                          |                                           |  |  |  |  |  | 1465   | CSRP1     | askfaqigiseSercprcsav  |
| IP100442073 | 131  | 123  |                                     |                                           |  |  |  |  |  | 1465   | CSRP1     | iqasercprcsavvayvqg    |
| IP100444452 | 148  | 152  | unsp+PKC->unsp                      | PKG+PKA+DNAPK->ATM+PKG+PKA+DNAPK          |  |  |  |  |  | 4343   | MOV10     | ridlnrkeVTrlrmgqtas    |
| IP100444646 | 647  | 639  | PKC->unsp+cdc2                      |                                           |  |  |  |  |  | 11276  | SYNRG     | apslmpipgTkalpsmdkya   |
| IP100444646 | 647  | 644  | unsp+PKC->                          | unsp+PKC->unsp                            |  |  |  |  |  | 11276  | SYNRG     | mplpqtalpSmndkyavfkgi  |
| IP100444646 | 878  | 873  | PKC->                               | PKC->                                     |  |  |  |  |  | 11276  | SYNRG     | gstvkqgnsTaastkydvfr   |
| IP100444646 | 878  | 876  | unsp+PKC->                          | unsp+PKC->                                |  |  |  |  |  | 11276  | SYNRG     | vkqgnstaaStkydvfrqls   |
| IP100444646 | 878  | 877  |                                     | unsp->unsp+DNAPK                          |  |  |  |  |  | 11276  | SYNRG     | kggnstaaStkydvfrqls    |
| IP100444646 | 878  | 879  | unsp->                              | unsp->                                    |  |  |  |  |  | 11276  | SYNRG     | gonstaastkydvfrqlsle   |
| IP100444646 | 878  | 886  | unsp+CKI+PKA->unsp+CKI              | unsp+CKI+PKA->unsp+CKI                    |  |  |  |  |  | 11276  | SYNRG     | stkydvfrqlSlegslgved   |
| IP100446767 | 237  | 234  | ->CKII                              | ->CKII                                    |  |  |  |  |  | 7091   | TLE4      | dysseskkqlTeeklaearyd  |
| IP100446767 | 281  | 282  | ->PKC                               | ->PKC                                     |  |  |  |  |  | 7091   | TLE4      | hsrgrenldTrllkldapsi   |
| IP100446986 | 3    | 4    | unsp->                              | unsp->                                    |  |  |  |  |  | 2533   | FYB       | -----makYntgtnptedv    |
| IP100446986 | 149  | 155  | ->PKA                               |                                           |  |  |  |  |  | 2533   | FYB       | dhdlplgplqSgpttpsene   |
| IP100446986 | 265  | 256  |                                     | cdc2+DNAPK->DNAPK                         |  |  |  |  |  | 2533   | FYB       | enkdhageisSlpfpgvllp   |
| IP100446986 | 265  | 269  | unsp->                              | unsp->unsp+cdc2                           |  |  |  |  |  | 2533   | FYB       | fpgvllpkaaSrpggslgsk   |
| IP100448465 | 39   | 36   | unsp+PKC+DNAPK->unsp+DNAPK          |                                           |  |  |  |  |  | 23253  | ANKRD12   | ygrrskdiaSystkpiers    |
| IP100448465 | 39   | 38   | PKC->CKI                            | PKC->ATM+DNAPK                            |  |  |  |  |  | 23253  | ANKRD12   | sktkskiasySktpkiersd   |
| IP100448798 | 8    | 3    | PKC->                               | PKC->                                     |  |  |  |  |  | 1452   | CSNK1A1   | -----maSSsgskaeifv     |
| IP100448798 | 8    | 4    | CKI+PKC->CKI                        | CKI+PKC->CKI                              |  |  |  |  |  | 1452   | CSNK1A1   | -----massSgskaeifv     |
| IP100448798 | 8    | 5    | unsp+PKC+cdc2->cdc2                 | unsp+PKC+cdc2->unsp+cdc2                  |  |  |  |  |  | 1452   | CSNK1A1   | -----massSgskaeifvg    |
| IP100448798 | 8    | 7    | unsp+PKC->unsp+DNAPK                | unsp+PKC->ATM+unsp+DNAPK                  |  |  |  |  |  | 1452   | CSNK1A1   | -----masssgSkaeifvgky  |
| IP100449049 | 105  | 104  | PKC+CKII->CKII+DNAPK                | PKC+CKII->CKII+DNAPK                      |  |  |  |  |  | 142    | PARP1     | vtbqgdqdgSKaektldgfa   |
| IP100449049 | 498  | 499  |                                     | unsp+PKA+RSK->PKA+RSK                     |  |  |  |  |  | 142    | PARP1     | pvevaprpgKsGaalskskg   |
| IP100449049 | 505  | 504  |                                     | unsp+PKC->unsp+PKC+DNAPK                  |  |  |  |  |  | 142    | PARP1     | aprgksaalSKsgsgqvkee   |
| IP100449049 | 505  | 507  | unsp+CKI+PKC->CKI+PKC               |                                           |  |  |  |  |  | 142    | PARP1     | kgsgaalskSKsgvkeegin   |
| IP100449049 | 508  | 507  | unsp+CKI+PKC->CKI+PKC+PKA           |                                           |  |  |  |  |  | 142    | PARP1     | kgsgaalskSKsgvkeegin   |
| IP100449049 | 521  | 519  | unsp+PKC->                          | unsp+PKC->                                |  |  |  |  |  | 142    | PARP1     | gkveekingSKegmkItkg    |
| IP100449049 | 521  | 526  | unsp+PKC+PKG+PKA->unsp+PKC          | unsp+PKC+PKG+PKA->unsp+PKC+PKG+cdc2       |  |  |  |  |  | 142    | PARP1     | inseksmkItkggaavdpd    |
| IP100449049 | 524  | 526  | unsp+PKC+PKG+PKA->unsp+PKC          | unsp+PKC+PKG+PKA->unsp+PKC                |  |  |  |  |  | 142    | PARP1     | inseksmkItkggaavdpd    |
| IP100449049 | 548  | 554  | ->cdc2+PKA                          |                                           |  |  |  |  |  | 142    | PARP1     | hvklegkvfSatlgldvld    |
| IP100449049 | 551  | 554  | ->cdc2                              | ->cdc2                                    |  |  |  |  |  | 142    | PARP1     | hvklegkvfSatlgldvld    |
| IP100449049 | 600  | 598  | PKC+cdc2->CKII+cdc2                 | PKC+cdc2->CKII+cdc2                       |  |  |  |  |  | 142    | PARP1     | swrgvgtvigSnkleqmpske  |
| IP100449049 | 600  | 606  | unsp->unsp+CKI+cdc2                 |                                           |  |  |  |  |  | 142    | PARP1     | igsnkleqmpSKedaiehfmk  |
| IP100449197 | 352  | 353  |                                     | ->unsp                                    |  |  |  |  |  | 51292  | GMPR2     | fptlrasegkTvevpfgdve   |
| IP100449923 | 774  | 777  | PKA->                               | PKA->                                     |  |  |  |  |  | 10743  | RA1       | tkgleaggkaSdgiskgdthe  |
| IP100449923 | 1083 | 1076 |                                     | unsp+cdk5+p38MAPK->unsp+GSK3+cdk5+p38MAPK |  |  |  |  |  | 10743  | RA1       | rtppgpglItIapbdplkgk   |
| IP100450472 | 65   | 68   | INSR+unsp+EGFR->INSR+unsp           | INSR+unsp+EGFR->INSR+unsp                 |  |  |  |  |  | 7329   | UBE2I     | fkrmfkldItgppskckfke   |
| IP100450472 | 65   | 71   | GSK3+cdk5->GSK3+cdk5+cdc2           |                                           |  |  |  |  |  | 7329   | UBE2I     | rmfkldkypSPpckfeppl    |
| IP100451401 | 156  | 159  | PKA->                               | PKA->                                     |  |  |  |  |  | 7167   | TP1       | kviadvnkvwSKvlayepvw   |
| IP100452463 | 663  | 665  | PKC+PKG->PKC                        | PKC+PKG->PKC                              |  |  |  |  |  | 9666   | DZIP3     | vksgqrkklkTknknkdske   |
| IP100452463 | 664  | 665  | PKC+PKG->PKC                        | PKC+PKG->PKC                              |  |  |  |  |  | 9666   | DZIP3     | vksgqrkklkTknknkdske   |
| IP100453473 | 6    | 2    | PKC->                               |                                           |  |  |  |  |  | 121504 | HIST4H4   | -----mSgrgkggklg       |
| IP100453473 | 32   | 31   | PKC+cdc2->cdc2                      | PKC+cdc2->cdc2                            |  |  |  |  |  | 121504 | HIST4H4   | kvlrndiagiTKpairralr   |
| IP100453473 | 92   | 97   | PKC+PKA->PKC                        | unsp+PKA->PKC                             |  |  |  |  |  | 121504 | HIST4H4   | vvaylkrqrTYtfgfg----   |
| IP100454695 | 12   | 15   | unsp+PKC->PKC                       | unsp+PKA->PKC                             |  |  |  |  |  |        | Uniprot   | akrapagkkgSKkavtaaqkk  |
| IP100454695 | 13   | 15   | unsp+PKC->PKC                       | unsp+PKC->PKC                             |  |  |  |  |  |        | Uniprot   | akrapagkkgSKkavtaaqkk  |
| IP100455210 | 115  | 111  |                                     | unsp+CKI+cdk5+p38MAPK->CKI+cdk5+p38MAPK   |  |  |  |  |  | 1108   | CHD4      | lsrdsegdyTpgkklklklg   |
| IP100455210 | 304  | 303  |                                     | PKC->ATM+PKC+DNAPK                        |  |  |  |  |  | 1108   | CHD4      | plklklggfsgSKrksrsedd  |
| IP100455210 | 304  | 309  | unsp+PKA->unsp                      |                                           |  |  |  |  |  | 1108   | CHD4      | ggfsgskrrksSseeddldves |
| IP100455210 | 884  | 883  | ->PKA                               | ->DNAPK                                   |  |  |  |  |  | 1108   | CHD4      | deahrlnknngSKffrvlmgys |
| IP100455210 | 1671 | 1676 | unsp+PKA->unsp                      | unsp+PKA->unsp                            |  |  |  |  |  | 1108   | CHD4      | aadveekveekSaiditpive  |
| IP100455423 | 146  | 145  | PKC+cdc2->cdc2                      | PKC+cdc2->cdc2+DNAPK                      |  |  |  |  |  | 440577 | LOC440577 | sgkrspagpgSKvpqkvklla  |
| IP100455620 | 181  | 177  | unsp->unsp+PKA                      | unsp->unsp+PKA                            |  |  |  |  |  | 22902  | RUFY3     | lralmqklSeymkalinnk    |
| IP100455620 | 181  | 179  | INSR->                              | INSR->                                    |  |  |  |  |  | 22902  | RUFY3     | lalmqklkSeymkalinnk    |
| IP100455623 | 136  | 137  | unsp->SRC+unsp                      | unsp->SRC+unsp                            |  |  |  |  |  | 84779  | NAA11     | rfqisevepkyYadgedayam  |
| IP100455623 | 136  | 138  | INSR+unsp->unsp                     |                                           |  |  |  |  |  | 84779  | NAA11     | rfqisevepkyYadgedayamk |
| IP100456429 | 88   | 81   |                                     | ->PKA                                     |  |  |  |  |  | 73119  | UBA52     | IRlrggiepSlrIlaqlkynnc |
| IP100456620 | 902  | 897  | unsp+PKC+PKA+RSK->unsp+PKA+RSK      | unsp+PKC+PKA+RSK->unsp+PKA+RSK            |  |  |  |  |  | 7862   | BRP1      | lhhrvntdkYthpgyfgkngp  |
| IP100456758 | 47   | 48   | INSR+unsp->INSR                     | INSR+unsp->INSR                           |  |  |  |  |  | 6157   | RPL27A    | lrnfdrfndkYthpgyfgkngp |
| IP100456758 | 55   | 52   |                                     | ->INSR                                    |  |  |  |  |  | 6157   | RPL27A    | lrnfdrfndkYthpgyfgkngp |
| IP100456758 | 110  | 106  | ->unsp+PKA                          | ->unsp                                    |  |  |  |  |  | 6157   | RPL27A    | gaapldvrvSgykvlgkglk   |
| IP100456758 | 110  | 108  | INSR+EGFR->INSR                     |                                           |  |  |  |  |  | 6157   | RPL27A    | apiadvrsrgYkvlgvgklp   |
| IP100456758 | 110  | 109  | INSR+unsp->unsp                     |                                           |  |  |  |  |  | 6157   | RPL27A    | apiadvrsrgYkvlgvgklp   |
| IP100456887 | 553  | 554  |                                     | cdc2->PKC+cdc2                            |  |  |  |  |  | 221092 | HNR1UL2   | gorkllrlfTsrkvsvvsv    |
| IP100456969 | 371  | 362  | PKC->PKC+cdc2                       |                                           |  |  |  |  |  | 1778   | DYNC1H1   | kirqalvalTfhlrknrtky   |
| IP100456969 | 371  | 370  | unsp+PKC+PKG->unsp+PKC+PKA+DNAPK    | unsp+PKC+PKG->unsp+PKC+DNAPK              |  |  |  |  |  | 1778   | DYNC1H1   | thlkrntkYtpiqralrI     |
| IP100456969 | 371  | 372  | unsp->                              | unsp->INSR                                |  |  |  |  |  | 1778   | DYNC1H1   | thlkrntkYtpiqralrIve   |
| IP100456969 | 394  | 385  |                                     | cdc2->                                    |  |  |  |  |  | 1778   | DYNC1H1   | qrarlvealSrlssqllkv    |
| IP100456969 | 394  | 390  | PKC->                               | PKC->                                     |  |  |  |  |  | 1778   | DYNC1H1   | lveaisrldlsSqliklvtrk  |
| IP100456969 | 754  | 745  | ->cdc2                              |                                           |  |  |  |  |  | 1778   | DYNC1H1   | lkvnflpeiITskernmlkw   |
| IP100456969 | 1125 | 1122 | unsp->                              |                                           |  |  |  |  |  | 1778   | DYNC1H1   | vgskvnlkvYshwkeiskfg   |
| IP100456969 | 1286 | 1286 | unsp+cdc2+CKII->unsp                |                                           |  |  |  |  |  | 1778   | DYNC1H1   | apeyglqITlysgdklgrk    |
| IP100456969 | 3480 | 3471 | ->PKA                               |                                           |  |  |  |  |  | 1778   | DYNC1H1   | aaveakvnsFalilksisae   |
| IP100456969 | 3480 | 3481 |                                     | unsp->                                    |  |  |  |  |  | 1778   | DYNC1H1   | kvnrstallkSlasaeerwek  |
| IP100456969 | 4283 | 4280 | unsp->PKA                           |                                           |  |  |  |  |  | 1778   | DYNC1H1   | erlfrtsfdSefklackdv    |
| IP100456970 | 556  | 558  | unsp+PKC->PKC                       |                                           |  |  |  |  |  | 8621   | CDK13     | vennlidvkaTkkavivgks   |
| IP100464979 | 78   | 75   | ->EGFR                              | ->EGFR                                    |  |  |  |  |  | 8803   | SUCLA2    | qeavsvpkyYakspdeaya    |
| IP100464979 | 78   | 79   | unsp+GSK3+cdk5+CKII->unsp+cdc2+CKII | unsp+GSK3+cdk5+CKII->unsp+cdc2+CKII       |  |  |  |  |  | 8803   | SUCLA2    | vsvpkyvaykSdeayaalkd   |
| IP100465028 | 275  | 273  | unsp->PKA                           | unsp->PKA                                 |  |  |  |  |  | 7167   | TP1       | dvdlvgvgaSsklpfvdini   |
| IP100465044 | 92   | 91   |                                     | unsp->unsp+DNAPK                          |  |  |  |  |  | 55920  | RC2       | aaevitpephtKervkleag   |
| IP100465044 | 293  | 290  | ->PKA                               | unsp->unsp+DNAPK                          |  |  |  |  |  | 55920  | RC2       | cpayglqITlysgdklgrk    |
| IP100465070 | 10   | 12   | unsp+PKC+PKG->PKC                   | unsp+PKC+PKG->unsp+PKC                    |  |  |  |  |  | 8356   | HIST1H3   | artktarktsTgkqarkqla   |
| IP100465070 | 15   | 11   |                                     | unsp->unsp+PKG                            |  |  |  |  |  | 8356   | HIST1H3   | martktarkTstgqarkqla   |
| IP100465070 | 15   | 12   | unsp+PKC+PKG->PKG+PKA               | unsp+PKC+PKG->PKG+PKG                     |  |  |  |  |  | 8356   | HIST1H3   | qtkatarktsTgkqarkqla   |
| IP100465070 | 24   | 23   |                                     | PKC->PKC+DNAPK                            |  |  |  |  |  | 8356   | HIST1H3   | qgkaparkqlaTkaarksapat |
| IP100465070 | 24   | 29   | unsp+PKG+PKA->unsp+PKA              |                                           |  |  |  |  |  | 8356   | HIST1H3   | qklatkaarkSapatgvkppk  |
| IP100465070 | 28   | 29   | unsp+PKG+PKA->unsp+PKC+PKG+PKA      | unsp+PKG+PKA->unsp+PKC+PKG+PKA            |  |  |  |  |  | 8356   | HIST1H3   | qklatkaarkSapatgvkppk  |
| IP100465070 | 57   | 58   | unsp->                              | unsp->                                    |  |  |  |  |  | 8356   | HIST1H3   | alreirryakStellirlpf   |
| IP100465070 | 116  | 108  | ->cdc2                              |                                           |  |  |  |  |  | 8356   | HIST1H3   | eayvlgfledTncialhavr   |
| IP100465070 | 116  | 119  | unsp+PKA->                          | unsp+PKA->                                |  |  |  |  |  | 8356   | HIST1H3   | ncaihavrTmnpkdqilar    |
| IP100465070 | 123  | 119  | unsp+PKA->PKA                       | INSR+unsp->unsp                           |  |  |  |  |  | 8356   | HIST1H3   | ncaihavrTmnpkdqilar    |
| IP100465170 | 248  | 241  | INSR+unsp->unsp                     |                                           |  |  |  |  |  | 51559  | NTSDC3    | neyflknndYepvhlkydkv   |
| IP100465170 | 248  | 247  | unsp->                              |                                           |  |  |  |  |  | 51559  | NTSDC3    | nidydepvhlYkdvksrdv    |
| IP100465233 | 488  | 491  | ->cdc2                              | ->cdc2                                    |  |  |  |  |  |        |           |                        |

Table S3

|             |      |      |                                                       |                                         |                              |  |  |  |  |        |           |                        |
|-------------|------|------|-------------------------------------------------------|-----------------------------------------|------------------------------|--|--|--|--|--------|-----------|------------------------|
| IP100465256 | 34   | 25   | PKA->cdc2+PKA                                         |                                         |                              |  |  |  |  | 50808  | AK3       | apsgsgkvtSrrthfllh     |
| IP100465256 | 34   | 29   | unsp+RSK->unsp                                        |                                         |                              |  |  |  |  | 50808  | AK3       | kgtyvsrrtThfklhllsg    |
| IP100465256 | 34   | 37   | unsp+PKA->unsp                                        | unsp+PKA->unsp                          |                              |  |  |  |  | 50808  | AK3       | ithfllhklSgdlldnml     |
| IP100465256 | 34   | 38   | PKA->                                                 | PKA->                                   |                              |  |  |  |  | 50808  | AK3       | thfllhklSgdlldnmlr     |
| IP100465275 | 405  | 403  | PKC->                                                 | PKC->                                   |                              |  |  |  |  | 10048  | RANBP9    | tdqtvleelaSiknrqriql   |
| IP100465294 | 626  | 621  | unsp->INSR+unsp                                       | unsp->INSR+unsp                         |                              |  |  |  |  | 988    | CDC5L     | ehitylehnPyekfskeelk   |
| IP100465294 | 626  | 625  | unsp+CKII->unsp+CKI+CKII                              | unsp+CKII->ATM+unsp+CKII+DNAPK          |                              |  |  |  |  | 988    | CDC5L     | ylehnpyekfSkeelkaqdv   |
| IP100465345 | 170  | 166  | ->unsp                                                | ->unsp                                  |                              |  |  |  |  | 25766  | PRPF40B   | lsqcpkweykSDtkpkyppynn |
| IP100465345 | 170  | 168  | unsp+PKC->                                            | unsp+PKC->                              |                              |  |  |  |  | 25766  | PRPF40B   | qcwkeyksdTKpkyppynns   |
| IP100465345 | 170  | 172  | INSR->                                                | INSR->                                  |                              |  |  |  |  | 25766  | PRPF40B   | keycsdtkpkyppynnskesr  |
| IP100465345 | 170  | 173  | INSR+unsp->INSR                                       | INSR->                                  |                              |  |  |  |  | 25766  | PRPF40B   | eyksdtkpkyppynnskesrw  |
| IP100465361 | 174  | 170  | unsp+PKG+CKII->unsp+PKG+PKA+CKII                      |                                         |                              |  |  |  |  | 6137   | RPL13     | vykkekarvTeeknfkafa    |
| IP100465361 | 177  | 181  | unsp+PKC->                                            |                                         |                              |  |  |  |  | 6137   | RPL13     | eeeknfkafaSlrmaranarl  |
| IP100465363 | 7    | 5    | unsp->                                                | unsp->                                  |                              |  |  |  |  | 255626 | HIST1H2BA | -----mpevSskgatiskggf  |
| IP100465363 | 7    | 6    |                                                       | unsp+ATM+unsp+DNAPK                     |                              |  |  |  |  | 255626 | HIST1H2BA | -----mpevSskgatiskggf  |
| IP100465363 | 12   | 12   | unsp+CKI+PKC->CKI+PKC                                 | unsp+CKI+PKC->PKC                       |                              |  |  |  |  | 255626 | HIST1H2BA | pevsskgatigSkkgfkavkv  |
| IP100465363 | 13   | 12   |                                                       | unsp+CKI+PKC->ATM+unsp+CKI+PKC+DNAPK    |                              |  |  |  |  | 255626 | HIST1H2BA | pevsskgatigSkkgfkavkv  |
| IP100465363 | 14   | 10   | PKC->                                                 |                                         |                              |  |  |  |  | 255626 | HIST1H2BA | pevsskgatigSkkgfkavkv  |
| IP100465363 | 14   | 12   | unsp+CKI+PKC->CKI+PKC                                 | unsp+CKI+PKC->PKC                       |                              |  |  |  |  | 255626 | HIST1H2BA | pevsskgatigSkkgfkavkv  |
| IP100465363 | 17   | 12   | unsp+CKI+PKC->unsp+PKC                                | unsp+CKI+PKC->PKC                       |                              |  |  |  |  | 255626 | HIST1H2BA | pevsskgatigSkkgfkavkv  |
| IP100465363 | 18   | 12   | unsp+CKI+PKC->unsp+PKC                                | unsp+CKI+PKC->unsp+PKC                  |                              |  |  |  |  | 255626 | HIST1H2BA | pevsskgatigSkkgfkavkv  |
| IP100465363 | 25   | 23   | unsp+PKC->                                            | unsp+PKC->                              |                              |  |  |  |  | 255626 | HIST1H2BA | kggfkavkvTqkkegkkrkr   |
| IP100465363 | 110  | 114  | unsp->                                                |                                         |                              |  |  |  |  | 255626 | HIST1H2BA | lpgelakhavSegtkavtkyt  |
| IP100465363 | 122  | 121  |                                                       | ->ATM+DNAPK                             |                              |  |  |  |  | 255626 | HIST1H2BA | havsegtkavTyktsk----   |
| IP100465363 | 122  | 124  |                                                       | PKC->                                   |                              |  |  |  |  | 255626 | HIST1H2BA | segtkavkyTssk-----     |
| IP100465373 | 108  | 105  | cdc2->PKA+cdc2                                        | cdc2->PKA                               |                              |  |  |  |  | 56267  | CCBL2     | natyrgfghpSvklalsy     |
| IP100465373 | 116  | 116  | PKC->                                                 |                                         |                              |  |  |  |  | 56267  | CCBL2     | fgphspvklalsylyeklyqkq |
| IP100465373 | 116  | 118  |                                                       | ->EGFR                                  |                              |  |  |  |  | 56267  | CCBL2     | kalsylyeklyqkqdsnei    |
| IP100465428 | 3538 | 3537 |                                                       | ->DNAPK                                 |                              |  |  |  |  | 54832  | VPS13C    | gvvgvgtgllTKpvegakkag  |
| IP100465436 | 237  | 236  | unsp->                                                | unsp->INSR+unsp                         |                              |  |  |  |  | 847    | CAT       | ngaevyckfhYktdgdgnlrs  |
| IP100465439 | 13   | 9    |                                                       | unsp+GSK3+p38MAPK->unsp+p38MAPK         |                              |  |  |  |  | 226    | ALDOA     | ---mppyqpalTpeekelsdi  |
| IP100465439 | 42   | 39   | PKC->                                                 |                                         | Uniprot PhosphoSite          |  |  |  |  | 226    | ALDOA     | gilaadestgSiakrlsigt   |
| IP100465439 | 42   | 46   | PKA+RSK->PKA                                          |                                         | Uniprot PhosphoSite          |  |  |  |  | 226    | ALDOA     | stgasiakrlgSigtenteenr |
| IP100470502 | 53   | 56   |                                                       | ->PKC                                   | Uniprot PHOSPHOELM PhosphoSi |  |  |  |  | 27068  | PPA2      | qnryrlfkvnTghyisphfdi  |
| IP100470502 | 231  | 230  |                                                       | ->DNAPK                                 |                              |  |  |  |  | 27068  | PPA2      | laniandpeaSkfhddvkkk   |
| IP100470502 | 291  | 286  | PKC->                                                 |                                         |                              |  |  |  |  | 27068  | PPA2      | kafaleivylTgkwallmkl   |
| IP100470528 | 83   | 80   | PKC->                                                 |                                         |                              |  |  |  |  | 6138   | RPL15     | krkrpvpkgTaYgkpvhghvn  |
| IP100470528 | 153  | 152  |                                                       | PKC->ATM+PKC+DNAPK                      |                              |  |  |  |  | 6138   | RPL15     | irmpdqtwtTKpvkhkhrnm   |
| IP100470573 | 327  | 320  | CKII->cdc2+CKII                                       |                                         |                              |  |  |  |  | 10097  | ACTR2     | ggstmypglbSriekelqda   |
| IP100470883 | 607  | 601  |                                                       | CKII->                                  |                              |  |  |  |  | 10735  | STAG2     | lpqytleiyTgrlekhlly    |
| IP100470883 | 607  | 602  | unsp+PKC->unsp                                        |                                         |                              |  |  |  |  | 10735  | STAG2     | payfdleiyTgrlekhlal    |
| IP100470891 | 81   | 79   | unsp+PKC+PKG->                                        | unsp+PKC+PKG->                          |                              |  |  |  |  | 7812   | CSDE1     | vefevsdrrTgkpiavkivk   |
| IP100470891 | 434  | 431  | PKC->CKII                                             |                                         |                              |  |  |  |  | 7812   | CSDE1     | hshsdhrflgTvekeatfnp   |
| IP100472160 | 447  | 440  | unsp+PKC+PKA->unsp+PKC+cdc2+PKA                       |                                         |                              |  |  |  |  | 9181   | ARHGGEF2  | kytsfearshSkalkykyely  |
| IP100472160 | 447  | 450  | unsp->                                                |                                         |                              |  |  |  |  | 9181   | ARHGGEF2  | skalkykyelyTdkrlfsgql  |
| IP100472724 | 172  | 175  |                                                       | unsp->                                  |                              |  |  |  |  | 158078 | EEF1A3    | kyeeivkeivTskkykignp   |
| IP100472724 | 179  | 177  | EGFR->                                                |                                         |                              |  |  |  |  | 158078 | EEF1A3    | yrviekevstYkkygynpdt   |
| IP100472724 | 318  | 316  | unsp+PKC->unsp                                        | unsp+PKC->unsp                          |                              |  |  |  |  | 158078 | EEF1A3    | dnvngfkvnySvdkdvrngva  |
| IP100472782 | 435  | 434  | unsp+CKI->unsp+CKI+DNAPK                              | unsp+CKI->unsp+CKI+DNAPK                |                              |  |  |  |  | 9678   | PHF14     | rpvttemnySkygakecsfc   |
| IP100472782 | 435  | 436  | ->SRC                                                 |                                         |                              |  |  |  |  | 9678   | PHF14     | vttemnySkYgakecsfcd    |
| IP100472939 | 169  | 170  | INSR+unsp->unsp                                       |                                         |                              |  |  |  |  | 9789   | SPCS2     | sssklrddkYtklftisgr    |
| IP100472939 | 169  | 171  | unsp+PKC->PKC                                         | unsp+PKC->unsp                          |                              |  |  |  |  | 9789   | SPCS2     | ssklrddkYtklftisgr     |
| IP100472939 | 191  | 190  |                                                       | CKI->DNAPK                              |                              |  |  |  |  | 9789   | SPCS2     | tkqrgreafTKlktfdrth    |
| IP100473014 | 114  | 113  | ->PKA                                                 | ->ATM                                   |                              |  |  |  |  | 11034  | DSTN      | lwapalekSkmyyasskda    |
| IP100473014 | 114  | 117  | unsp->                                                |                                         | PhosphoSite                  |  |  |  |  | 11034  | DSTN      | elaplkscmYasskdaikkl   |
| IP100473047 | 273  | 272  |                                                       | ->DNAPK                                 |                              |  |  |  |  | 5571   | PRKAG1    | ktynnlsvsTKalghrshyf   |
| IP100473136 | 866  | 864  | unsp+PKC->PKC                                         | unsp+PKC->PKC                           |                              |  |  |  |  | 1495   | CTNNA1    | vqtvkasyvasTKyqksagma  |
| IP100473136 | 866  | 865  |                                                       | unsp+PKC->PKC                           |                              |  |  |  |  | 1495   | CTNNA1    | qtkvasvasTKyqksagma    |
| IP100473136 | 866  | 867  | unsp+EGFR->unsp                                       |                                         |                              |  |  |  |  | 1495   | CTNNA1    | vkasyvastKYqksagmasln  |
| IP100473136 | 866  | 870  | unsp+DNAPK->DNAPK                                     |                                         |                              |  |  |  |  | 1495   | CTNNA1    | syvastkyqKsagmaslnpa   |
| IP100473136 | 866  | 875  | ->cdc2                                                |                                         |                              |  |  |  |  | 1495   | CTNNA1    | tkyqksagmaSlnpjvswkm   |
| IP100477040 | 38   | 30   | unsp+PKG+CKII+RSK+DNAPK->unsp+PKG+cdc2+CKII+RSK+DNAPK |                                         |                              |  |  |  |  | 23511  | NUP188    | llgrslarvTSjaleelnkhly |
| IP100477313 | 93   | 98   | PKC->                                                 |                                         |                              |  |  |  |  | 54511  | HNGCL11   | glsqkavvgtTdkliefnrl   |
| IP100477313 | 39   | 38   | ->CKI+DNAPK                                           | ->ATM+DNAPK                             |                              |  |  |  |  | 3183   | HNRNPC    | vkksdveafSKykvlgcvcs   |
| IP100477313 | 50   | 47   | PKC->PKA                                              | PKC->PKC+PKA                            |                              |  |  |  |  | 3183   | HNRNPC    | fskyqkvigcvShvhgafavq  |
| IP100477313 | 170  | 162  | unsp->unsp+PKA                                        | unsp->unsp+PKA                          | Uniprot PHOSPHOELM           |  |  |  |  | 3183   | HNRNPC    | avvpskqrqvSgntsrsgksf  |
| IP100477313 | 170  | 166  | unsp+PKC->unsp                                        | unsp+PKC->unsp                          |                              |  |  |  |  | 3183   | HNRNPC    | skrqvsgntSrgksgfnsk    |
| IP100477313 | 170  | 175  | unsp+cdc2->cdc2                                       |                                         |                              |  |  |  |  | 3183   | HNRNPC    | tsrsgksgfnSksgrgssks   |
| IP100477495 | 6    | 7    |                                                       | unsp->                                  |                              |  |  |  |  | 51415  | H2BFS     | ----mpepakSapapkgsgkk  |
| IP100477495 | 12   | 7    | unsp->                                                | unsp->                                  |                              |  |  |  |  | 51415  | H2BFS     | ----mpepakSapapkgsgkk  |
| IP100477495 | 12   | 15   | unsp+PKC->PKC                                         | unsp+PKC->PKC                           | Uniprot                      |  |  |  |  | 51415  | H2BFS     | aksapapkgSakavkaqkk    |
| IP100477495 | 13   | 15   | unsp+PKC->PKC                                         | unsp+PKC->PKC                           |                              |  |  |  |  | 51415  | H2BFS     | aksapapkgSakavkaqkk    |
| IP100477495 | 16   | 15   | unsp+PKC->unsp+PKC+PKA                                | unsp+PKC->ATM+unsp+PKC+DNAPK            | Uniprot                      |  |  |  |  | 51415  | H2BFS     | aksapapkgSKavtkaaqkk   |
| IP100477495 | 21   | 15   | unsp+PKC->unsp+PKC+PKA                                | unsp+PKC->unsp+PKC+PKA                  | Uniprot                      |  |  |  |  | 51415  | H2BFS     | aksapapkgSKavtkaaqkk   |
| IP100477495 | 21   | 20   |                                                       | PKC->PKC+DNAPK                          |                              |  |  |  |  | 51415  | H2BFS     | aplgkskavTKaqqkdgkrk   |
| IP100477495 | 109  | 113  | unsp->                                                |                                         |                              |  |  |  |  | 51415  | H2BFS     | lpgelakhavSegtkavtkyt  |
| IP100477505 | 106  | 105  |                                                       | PKA->ATM+PKA                            |                              |  |  |  |  | 23243  | ANKRD28   | lsgarvnakdSkwltphlrv   |
| IP100477505 | 106  | 109  | cdc5+p38MAPK->cdc5                                    |                                         |                              |  |  |  |  | 23243  | ANKRD28   | rvnakdskwltphravasc    |
| IP100477686 | 22   | 26   | unsp+EGFR->                                           | unsp+EGFR->EGFR                         |                              |  |  |  |  | 2963   | GT2F2     | tgwlvkvpyYSsqwakasg    |
| IP100477686 | 33   | 28   | ATM+cdc2+DNAPK->ATM+DNAPK                             | ATM+cdc2+DNAPK->cdc2+DNAPK              |                              |  |  |  |  | 2963   | GT2F2     | vwlvkvpyYSsqwakasg     |
| IP100477686 | 33   | 35   | PKC->                                                 |                                         |                              |  |  |  |  | 2963   | GT2F2     | kylsqwakasSgrvnykrlr   |
| IP100477686 | 137  | 135  | unsp->                                                | unsp->                                  |                              |  |  |  |  | 2963   | GT2F2     | mrklrqlieeSKpvrslaqd   |
| IP100477686 | 137  | 136  | cdc2->cdc2+DNAPK                                      | cdc2->cdc2+DNAPK                        | Uniprot PhosphoSite          |  |  |  |  | 2963   | GT2F2     | rklrqlieeSKpvrslaqd    |
| IP100477686 | 137  | 142  | ATM+unsp+PKA+DNAPK->ATM+DNAPK                         | ATM+unsp+PKA+DNAPK->ATM+PKA+DNAPK       | Uniprot PhosphoSite          |  |  |  |  | 2963   | GT2F2     | leesskpvrlSqldkvvttn   |
| IP100477923 | 636  | 627  | unsp+GSK3+cdc5+p38MAPK->unsp+GSK3+cdc5+cdc2+p38MAPK   |                                         | Uniprot PHOSPHOELM PhosphoSi |  |  |  |  | 1822   | ATN1      | asspagykataSpggpypgktr |
| IP100477923 | 636  | 634  | EGFR->                                                |                                         |                              |  |  |  |  | 1822   | ATN1      | ktaspppppYgkrapspgp    |
| IP100477923 | 636  | 640  | unsp+GSK3+cdc5+PKA->unsp+GSK3+cdc5                    | unsp+GSK3+cdc5+PKA->unsp+GSK3+cdc5+cdc2 | Uniprot PHOSPHOELM PhosphoSi |  |  |  |  | 1822   | ATN1      | gpppygkrpSgpyatktatp   |
| IP100477923 | 786  | 785  |                                                       | PKC+cdc2->cdc2+DNAPK                    |                              |  |  |  |  | 1822   | ATN1      | sdlyvplegSklaakradly   |
| IP100478410 | 55   | 47   | unsp+PKC->unsp+PKC+PKA                                | unsp+PKC->unsp+PKC+PKA                  |                              |  |  |  |  | 509    | ATP5C1    | slmncaklSkmmkvaaya     |
| IP100478410 | 55   | 56   | EGFR->                                                |                                         |                              |  |  |  |  | 509    | ATP5C1    | ksmkmvaakYaaereelkpa   |
| IP100478410 | 79   | 73   | ->PKA                                                 |                                         |                              |  |  |  |  | 509    | ATP5C1    | lkpariyglSlaelykadik   |
| IP100478410 | 115  | 109  |                                                       | ->cdc2                                  |                              |  |  |  |  | 509    | ATP5C1    | drglcgaihSiaqmkmsvea   |
| IP100478410 | 115  | 116  | unsp->                                                | unsp->                                  |                              |  |  |  |  | 509    | ATP5C1    | ihssiakgmKSevatItaagk  |
| IP100478410 | 115  | 120  | PKC->                                                 | PKC->                                   |                              |  |  |  |  | 509    | ATP5C1    | iaqgmKsevaTItaagkevm   |
| IP100478410 | 197  | 192  | unsp+PKC+PKA->PKC+PKA                                 | unsp+PKC+PKA->PKC+PKA                   |                              |  |  |  |  | 509    | ATP5C1    | egsiifnkrSvisykteekp   |
| IP100478410 | 197  | 195  | unsp+PKC->CKII                                        | unsp+PKC->CKII                          |                              |  |  |  |  | 509    | ATP5C1    | ifnkrfsviSykteekpifs   |
| IP100478410 | 197  | 198  |                                                       | ->unsp                                  |                              |  |  |  |  | 509    | ATP5C1    | nkfrsvisyTKeeipfslnt   |
| IP100478410 | 197  | 205  | PKA+DNAPK->DNAPK                                      | PKA+DNAPK->DNAPK                        |                              |  |  |  |  | 509    | ATP5C1    | lytsaekpifSlyvasadsm   |
| IP100478718 | 28   | 33   | unsp+PKC->                                            | unsp+PKC->                              |                              |  |  |  |  | 164395 | TLL19     | qnqnykghlSKgkeraas     |
| IP100478772 | 17   | 15   | EGFR->                                                |                                         |                              |  |  |  |  | 56905  | C1orf39   | rlpirlapvmYgkrlpelteds |
| IP100479125 | 227  | 223  | unsp+PKC+PKG+PKA->unsp+PKG+PKA                        |                                         |                              |  |  |  |  | 23380  | SRGAP2    | vniekhhvrrSvskkiekme   |
| IP100479145 | 97   | 93   | unsp+PKC+RSK->unsp+PKA+RSK                            | unsp+PKC+RSK->unsp+RSK                  |                              |  |  |  |  | 3880   | KRM2      | tmqnlndriaSyldkvralea  |
| IP100479186 | 62   | 60   | unsp+CKI+PKC->CKI+CKII                                | unsp+CKI+PKC->CKII                      |                              |  |  |  |  | 5315   | PKM1      | tigpasrsvetTKemiksgmn  |
| IP100479186 | 62   | 67   | PKA->                                                 | PKA->                                   |                              |  |  |  |  | 5315   | PKM2      | svettkemikSGmnvarlnts  |
| IP100479186 | 89   | 87   |                                                       | unsp->                                  |                              |  |  |  |  | 5315   | PKM2      | shghtyhaeTKlknrvrtates |
| IP100479186 | 135  | 127  | CKII+PKA->cdc2+CKII+PKA                               |                                         |                              |  |  |  |  | 5315   | PKM2      | peirtglksgSgtaevellkg  |
| IP100479186 | 135  | 139  | unsp+PKC->PKC                                         | unsp+PKC+PKA->PKC                       |                              |  |  |  |  | 5315   | PKM2      | taevellkgTKlktfdrnym   |
| IP100479186 | 266  | 269  | unsp+PKC+CKII->PKC+CKII                               |                                         |                              |  |  |  |  | 5315   | PKM2      | gegknlkislKienhegyrr   |
| IP100479186 | 433  | 425  | ->PKA                                                 | ->PKA                                   |                              |  |  |  |  | 5315   | PKM2      | gaveafssCKSgaivltksg   |
| IP100479186 | 433  | 432  | PKC->PKC+DNAPK                                        | PKC-&                                   |                              |  |  |  |  |        |           |                        |

Table S3

|             |      |      |                                          |                                     |        |           |                         |
|-------------|------|------|------------------------------------------|-------------------------------------|--------|-----------|-------------------------|
| IP100513768 | 320  | 317  | unsp->                                   | unsp->                              | 219293 | ATAD3C    | arivmylneYilvkategr     |
| IP100513791 | 1962 | 1965 | PKA->                                    | PKA->                               | 85440  | DOCK7     | gelheqfrkTlittshafy     |
| IP100513827 | 334  | 333  |                                          | ->DNAPK                             | 34     | ACADM     | glacraideaTkyalerktfg   |
| IP100513827 | 334  | 335  | unsp->                                   | unsp->                              | 34     | ACADM     | agraldeatYalerktfgkl    |
| IP100514053 | 309  | 306  | unsp+cdc2->PKA+cdc2                      | unsp+cdc2->unsp+PKA+cdc2            | 372    | ARCN1     | elhgmimSdSkysyrihi      |
| IP100514053 | 309  | 310  | INSR+unsp->SRC+INSR+unsp                 | INSR+unsp->SRC+INSR+unsp            | 372    | ARCN1     | mimirsddkYgrihvene      |
| IP100514648 | 604  | 602  | unsp->                                   | unsp->                              | 6595   | SMARCA2   | dlpvkthteTgkvffpeap     |
| IP100514648 | 994  | 992  | unsp+PKC->unsp                           | unsp+PKC->unsp                      | 6595   | SMARCA2   | qakgilltdgSekdkkgkgga   |
| IP100514648 | 996  | 992  | unsp+PKC->unsp                           | unsp+PKC->unsp                      | 6595   | SMARCA2   | qakgilltdgSekdkkgkgga   |
| IP100514648 | 996  | 1004 | unsp+PKA->unsp                           | unsp+PKA->unsp                      | 6595   | SMARCA2   | kdkkgkggaKlTnmntlqrlk   |
| IP100514648 | 997  | 992  | unsp+PKC->unsp                           | unsp+PKC->unsp                      | 6595   | SMARCA2   | qakgilltdgSekdkkgkgga   |
| IP100514648 | 999  | 1004 | unsp+PKA->unsp                           | unsp+PKA->unsp                      | 6595   | SMARCA2   | kdkkgkggaKlTnmntlqrlk   |
| IP100514983 | 274  | 280  | unsp->unsp+PKA                           | unsp->unsp+PKA                      | 10808  | HSPH1     | qecckikimSsnstldplni    |
| IP100514983 | 274  | 281  | PKA->cdc2+PKA                            | PKA->cdc2+PKA                       | 10808  | HSPH1     | ecckikimSsnstldplnie    |
| IP100514983 | 274  | 283  | PKA->cdc2+PKA                            | PKA->cdc2+PKA                       | 10808  | HSPH1     | ekdkkmsnSstldplniecf    |
| IP100515061 | 6    | 7    |                                          | unsp->                              | 8970   | HIST1H2B1 | -----mpepakSapapkggskk  |
| IP100515061 | 12   | 7    | unsp->                                   | unsp->                              | 8970   | HIST1H2B1 | -----mpepakSapapkggskk  |
| IP100515061 | 12   | 15   | unsp+PKC->PKC                            | unsp+PKC->PKC                       | 8970   | HIST1H2B1 | aksapapkggSkkavtkaqkk   |
| IP100515061 | 13   | 15   | unsp+PKC->PKC                            | unsp+PKC->PKC                       | 8970   | HIST1H2B1 | aksapapkggSkkavtkaqkk   |
| IP100549171 | 33   | 24   |                                          | ATM+unsp+cdc2+DNAPK->ATM+unsp+DNAPK | 29803  | REPIN1    | laqprlsgSaqesptqlgke    |
| IP100549171 | 33   | 30   | unsp+PKC->unsp                           | unsp+PKC->unsp                      | 29803  | REPIN1    | lsgpsqesptqIgkesrglrq   |
| IP100549171 | 33   | 35   | PKA->                                    | PKA->                               | 29803  | REPIN1    | qesptqlgkeSnglrqagtsv   |
| IP100549171 | 276  | 276  | unsp+PKC+PKG+PKA->cdc2+PKA               | unsp+PKC+PKG+PKA->PKA               | 29803  | REPIN1    | hqpceqkTpyTkylytshrr    |
| IP100549171 | 276  | 280  | unsp+PKC->                               | unsp+PKC->PKC                       | 29803  | REPIN1    | gkrtnrkyTjTshnrhtgk     |
| IP100549189 | 538  | 529  | PKA->cdc2+PKA                            | PKA->cdc2+PKA                       | 7064   | THOP1     | lrmsrhyrtgSavprellekl   |
| IP100549189 | 538  | 542  |                                          | ->cdc2                              | 7064   | THOP1     | prelleklieSqantglfni    |
| IP100549205 | 270  | 269  | unsp->                                   | unsp->ATM+unsp+DNAPK                | 10111  | RAD50     | nrlikehnlSkimklidneik   |
| IP100549232 | 384  | 383  | PKC->                                    | PKC->DNAPK                          | 22862  | FNDC3A    | ipnprianrTksnltqwkia    |
| IP100549232 | 384  | 386  | PKA->CKI+PKA                             | PKA->CKI+PKA                        | 22862  | FNDC3A    | pprianrTksnltqwkapsd    |
| IP100549248 | 27   | 29   | ->unsp                                   | ->unsp                              | 4869   | NPM1      | fgcelkadkDhfkvdndene    |
| IP100549248 | 141  | 137  | unsp+PKC->unsp                           | unsp+PKC->unsp                      | 4869   | NPM1      | deeeedvllvIsgrksappg    |
| IP100549248 | 141  | 139  | unsp->cdc2                               | unsp->                              | 4869   | NPM1      | eeedvkltsIsgrksappggs   |
| IP100549248 | 141  | 143  | unsp+PKG->                               | unsp+PKG->unsp                      | 4869   | NPM1      | vkllsigrKtSappgskvqq    |
| IP100549248 | 150  | 149  | PKC+cdc2->cdc2                           | PKC+cdc2->cdc2+DNAPK                | 4869   | NPM1      | sgkrsappgggSkvpqkvkia   |
| IP100549248 | 154  | 149  | PKC+cdc2->                               | PKC+cdc2->cdc2                      | 4869   | NPM1      | sgkrsappgggSkvpqkvkia   |
| IP100549248 | 212  | 207  |                                          | unsp->                              | 4869   | NPM1      | rdtpaknaqkSngngkdsksps  |
| IP100549248 | 212  | 214  | unsp->PKC                                | unsp->                              | 4869   | NPM1      | aqksnqngkdSkpsstprskg   |
| IP100549248 | 212  | 217  | unsp+PKG->                               | unsp+PKG->PKG                       | 4869   | NPM1      | snongkdsdpStsprskges    |
| IP100549248 | 215  | 214  | unsp->unsp+DNAPK                         | unsp->unsp+DNAPK                    | 4869   | NPM1      | aqksnqngkdSkpsstprskg   |
| IP100549248 | 215  | 217  | unsp+PKG->unsp                           | unsp+PKG->unsp                      | 4869   | NPM1      | snongkdsdpStsprskges    |
| IP100549248 | 215  | 219  | unsp+PKC+cdk5+p38MAPK->unsp+cdk5+p38MAPK | unsp+PKC+cdk5+p38MAPK               | 4869   | NPM1      | snongkdsdpStsprskges    |
| IP100549248 | 229  | 227  | unsp+PKC->unsp                           | unsp+PKC->unsp                      | 4869   | NPM1      | stpsrskgqeSfkkqektptk   |
| IP100549248 | 229  | 234  | unsp+PKC->unsp                           | unsp+PKC->unsp                      | 4869   | NPM1      | ggesfkqektptktpkpgssv   |
| IP100549248 | 230  | 227  | unsp+PKC->unsp                           | unsp+PKC->unsp                      | 4869   | NPM1      | stpsrskgqeSfkkqektptk   |
| IP100549248 | 230  | 234  |                                          | unsp->unsp+p38MAPK                  | 4869   | NPM1      | ggesfkqektptktpkpgssv   |
| IP100549248 | 257  | 260  | ->cdc2                                   | ->cdc2                              | 4869   | NPM1      | kmqasiekkggSlpjkveakfn  |
| IP100549248 | 267  | 260  | ->cdc2                                   | ->PKA                               | 4869   | NPM1      | kmqasiekkggSlpjkveakfn  |
| IP100549248 | 273  | 271  |                                          | ->unsp                              | 4869   | NPM1      | lpmveakfnYknrcftrmdqt   |
| IP100549248 | 292  | 292  | PKA+RSK->PKC+PKA                         | PKA+RSK->PKC+PKA                    | 4869   | NPM1      | aiqdlvkwkrsi            |
| IP100549357 | 272  | 276  | unsp+PKA+DNAPK->PKA+DNAPK                | unsp+PKA+DNAPK->unsp+DNAPK          | 55572  | FOXRED1   | shevhwkrsi              |
| IP100549664 | 889  | 893  | unsp+PKC->unsp                           | unsp+PKC->unsp                      | 54881  | TEX10     | lvqiknitiTKsgsvqeqv     |
| IP100549664 | 889  | 898  |                                          | unsp+PKA->unsp                      | 54881  | TEX10     | iknitiTKsgsvqeqv        |
| IP100549672 | 298  | 299  |                                          | unsp->unsp+PKC                      | 5719   | PSMD13    | rlqtfeeiakSakitvnevel   |
| IP100549725 | 106  | 103  | PKC->                                    | PKC->                               | 5223   | PGAM1     | gglgtlnkaeTaahgeaavk    |
| IP100549725 | 113  | 118  | unsp+PKC+PKG+PKA->unsp+PKC+PKA           | unsp+PKC+PKG+PKA->unsp+PKC+PKA      | 5223   | PGAM1     | geaavkwrrSYdyvppmpmep   |
| IP100549730 | 206  | 203  | PKC->                                    | PKC->                               | 51074  | AP1P      | rrhgyvwwgeTweaktmceec   |
| IP100549730 | 206  | 209  | unsp+CKII->CKII                          | unsp+CKII->CKII                     | 51074  | AP1P      | vpgwetweaktTmcecydlfid  |
| IP100549730 | 208  | 203  | PKC->                                    | PKC->                               | 51074  | AP1P      | rrhgyvwwgeTweaktmceec   |
| IP100549955 | 377  | 378  |                                          | PKC->unsp+PKC                       | 55329  | MNS1      | akeeeenrTmlakfaedr      |
| IP100550020 | 4    | 5    | unsp->unsp+CKI                           | unsp->unsp+CKI                      | 5763   | PTMS      | -----msekSveaaalsak     |
| IP100550020 | 92   | 96   | unsp+PKG+RSK->unsp+PKG                   | unsp+PKG+RSK->unsp+RSK              | 5763   | PTMS      | edeadeprqkTengasa----   |
| IP100550021 | 294  | 291  |                                          | ->EGFR                              | 6122   | RPL3      | nnkiykigagYlikdglkln    |
| IP100550021 | 373  | 370  | unsp+PKC->unsp                           | unsp+PKC->unsp                      | 6122   | RPL3      | lekidklfidTskfghgrfq    |
| IP100550021 | 373  | 371  | PKC->                                    | PKC->                               | 6122   | RPL3      | ekidklfidTskfghgrfq     |
| IP100550021 | 373  | 372  |                                          | PKC->ATM+PKC+DNAPK                  | 6122   | RPL3      | kidklfidTskfghgrfq      |
| IP100550243 | 26   | 22   |                                          | ->EGFR                              | 55623  | THUMPDL1  | gggkrkgkaqYlvekrarrcd   |
| IP100550364 | 492  | 489  | unsp+PKC->unsp                           | unsp+PKC->unsp                      | 55276  | PGM2      | asyfchidkTsklfeenlm     |
| IP100550451 | 147  | 144  | ->EGFR                                   | ->EGFR                              | 5499   | PPP1CA    | ygyfdeckrrYniklwtftd    |
| IP100550655 | 7    | 3    | unsp->unsp+cdk5                          | unsp->unsp+cdk5                     | 10927  | SPIN1     | -----mkTpfqktppgrrs     |
| IP100550655 | 7    | 8    | unsp+cdk5->unsp+cdk5+p38MAPK             | unsp+cdk5->unsp+cdk5+p38MAPK        | 10927  | SPIN1     | -----mktptqkTpggrradag  |
| IP100550689 | 496  | 491  | unsp+PKC->PKC                            | unsp+PKC->PKC                       | 51493  | C22orf28  | vnmtchdagISkkaiklripa   |
| IP100550703 | 750  | 749  | unsp->unsp+PKA                           | unsp->ATM+unsp+DNAPK                | 54872  | PIGG      | gsvrfpwrpdSkidsglliea   |
| IP100550703 | 750  | 753  | unsp->cdc2                               | unsp->cdc2                          | 54872  | PIGG      | fpwrpdskidSkigiearfy    |
| IP100550703 | 754  | 749  | unsp->unsp+PKA                           | unsp->unsp+PKA                      | 54872  | PIGG      | gsvrfpwrpdSkidsglliea   |
| IP100550703 | 754  | 753  | unsp->unsp+PKA                           | unsp->unsp+PKA                      | 54872  | PIGG      | fpwrpdskidSkigiearfy    |
| IP100550746 | 239  | 232  | unsp+CKII->unsp+cdc2+CKII                | unsp->ATM+unsp+DNAPK                | 10726  | NUDC      | hnyevkseeSwiedgkvw      |
| IP100550746 | 239  | 242  | PKC->PKC+CKII                            | PKC->PKC+CKII                       | 10726  | NUDC      | swiedgkvwTvhleinkme     |
| IP100550900 | 93   | 98   | unsp+PKC->PKC                            | unsp+PKC->PKC                       | 7178   | TP1       | ykkyidykmSikgkleepr     |
| IP100550917 | 19   | 24   | unsp+PKC+PKA+RSK->unsp+PKC+RSK           | unsp+PKC+PKA+RSK->unsp+PKC+RSK      | 11344  | TFW2      | keffakaragSvriikvied    |
| IP100550991 | 260  | 259  |                                          | unsp+PKC->ATM+unsp+PKC+DNAPK        | 12     | SERPINA3  | qdtghsrfyISkklwvmpmm    |
| IP100550991 | 261  | 259  | unsp+PKC->PKC                            | unsp+PKC->PKC                       | 12     | SERPINA3  | qdtghsrfyISkklwvmpmm    |
| IP100550991 | 441  | 440  |                                          | ->DNAPK                             | 12     | SERPINA3  | ptdtgniffmSkvtnpkqa---- |
| IP100550991 | 441  | 443  | ->PKC                                    | ->PKC                               | 12     | SERPINA3  | tnqfiffmskYtnpkqa----   |
| IP100552413 | 161  | 158  | unsp->PKA                                | unsp->PKA                           | 1025   | CDK9      | gyefkarkTgkvlvlekrarrcd |
| IP100552440 | 126  | 132  | DNAPK->cdc2+DNAPK                        | DNAPK->cdc2+DNAPK                   | 51426  | POLK      | elkdplaviagSmsmlstnyh   |
| IP100552701 | 797  | 791  | unsp+PKC->unsp+PKC+PKA                   | unsp+PKC->unsp+PKC+PKA              | 1741   | DLG3      | ealmmnrrqTYeqanidydk    |
| IP100552873 | 6    | 2    | PKC->                                    | PKC->                               | 8336   | HIST1H2AM | -----mSgrgkqgkgr        |
| IP100552897 | 812  | 809  | unsp+PKC->unsp+PKC+PKA                   | unsp+PKC->unsp+PKC+PKA              | 9656   | MDC1      | pmatigagrgqTvdvkmgiipke |
| IP100552897 | 1402 | 1399 | unsp+PKC+PKA->unsp+PKA                   | unsp+PKC+PKA->unsp+PKA              | 9656   | MDC1      | stratrgkrrnSagkpetlvp   |
| IP100552897 | 1402 | 1400 | unsp+PKC+PKA->unsp+cdc2+PKA              | unsp+PKC+PKA->unsp+cdc2+PKA         | 9656   | MDC1      | ratrgkrrnSagkpetlvp     |
| IP100552897 | 1402 | 1403 | GSK3+cdk5->GSK3+cdk5+p38MAPK             | GSK3+cdk5->unsp+cdk5+p38MAPK        | 9656   | MDC1      | knrnsrsgTpetlvp         |
| IP100552978 | 607  | 601  |                                          | CKII->                              | 10735  | STAG2     | lbpqyfdileYTgriekhlida  |
| IP100552978 | 607  | 602  |                                          |                                     | 10735  | STAG2     | pcyfdileYTgriekhlida    |
| IP100553185 | 248  | 243  | unsp+PKC->unsp                           | unsp+CKII->CKII                     | 7203   | CCT3      | lknprivilidSleykgesq    |
| IP100553185 | 248  | 244  |                                          | DNAPK->unsp+DNAPK                   | 7203   | CCT3      | lknprivilidSleykgesq    |
| IP100553185 | 248  | 247  | unsp->                                   | unsp->                              | 7203   | CCT3      | rivilidSleykgesq        |
| IP100554436 | 605  | 601  | cdc2+DNAPK->DNAPK                        | cdc2+DNAPK->unsp+DNAPK              | 10147  | SFRS14    | dqlvkrriegSlspkertil    |
| IP100554560 | 442  | 437  | PKC+cdc2->cdc2                           | PKC+cdc2->cdc2                      | 400506 | C16orf88  | kysrgaglgfStapnkifyd    |
| IP100554560 | 442  | 445  | unsp->                                   | unsp->                              | 400506 | C16orf88  | gfstapnkifydmasksvk     |
| IP100554648 | 11   | 13   | unsp->unsp+PKC                           | unsp->                              | 3856   | KRT8      | irvtqskysvSTsgprafsr    |
| IP100554648 | 11   | 14   | unsp->                                   | unsp->                              | 3856   | KRT8      | rtvqskysvSTsgprafsr     |
| IP100554648 | 101  | 104  | unsp+PKC->unsp                           | unsp+PKC->unsp                      | 3856   | KRT8      | qiktlnkfsSfidvfrleq     |
| IP100554648 | 117  | 121  | PKC->                                    | PKC->                               | 3856   | KRT8      | fleaqnkmleTKwslqqqkt    |
| IP100554648 | 122  | 121  | PKC->                                    | PKC->                               | 3856   | KRT8      | fleaqnkmleTKwslqqqkt    |
| IP100554648 | 122  | 124  | PKA->                                    | PKA->                               | 3856   | KRT8      | qnkmleTKwslqqqktars     |
| IP100554648 | 472  | 475  | unsp->                                   | unsp->                              | 3856   | KRT8      | kietdrdklvSessdvlpk--   |
| IP100554652 | 455  | 451  | PKC->                                    | PKC->                               | 4046   | LSP1      | psgkrykfvaTghgkyekvlu   |
| IP100554652 | 455  | 456  | unsp->                                   | unsp->                              | 4046   | LSP1      | ykfvatghgkYekvveggpa    |
| IP100554681 | 30   | 29   | PKC->PKA                                 | PKC->                               | 4698   | NDUFA5    | tpherinlyTklidveelp     |
| IP100554681 | 46   | 48   |                                          | ->unsp                              | 4698   | NDUFA5    | nyrkrykYekvveggpa       |
| IP100554723 | 121  | 125  | PKC->                                    | PKC->                               | 6134   | RPL10     | mrgafgkpgpTvarvhigvi    |
| IP100554761 | 3    | 7    | unsp+PKG+PKA+RSK->unsp+PKG+PKA           | unsp+PKG+PKA+RSK->unsp+PKG+PKA      | 643790 | LOC643790 | -----mpkrkvSaaegaakeep  |
| IP100554761 | 5    | 7    |                                          | unsp+PKG+PKA+RSK->unsp+PKG+PKA      | 643790 | LOC643790 | -----mpkrkvSaaegaakeep  |
| IP100554761 | 27   | 25   | unsp+PKC+PKG->unsp+PKG                   | unsp+PKC+PKG->unsp                  | 643790 | LOC643790 | eeprksarSakpakveak      |
| IP100554761 | 42   | 45   | unsp->                                   | unsp->PKC                           | 643790 | LOC643790 | kpkaakaadkSsdikvqtgk    |
| IP100554761 | 48   | 45   | unsp->                                   | unsp+PKC->PKC                       | 643790 | LOC643790 | kpkaakaadkSsdikvqtgk    |
| IP100554761 | 48   | 46   | unsp+PKC->PKC                            | unsp+PKC->PKC                       | 643790 | LOC643790 | kpkaakaadkSsdikvqtgk    |
| IP100554761 | 48   | 52   | unsp+PKC->PKC                            | unsp+PKC->unsp+PKC+DNAPK            | 643790 | LOC643790 | kdssdkkvqTgkrqakgkq     |
| IP100554761 | 53   | 52   |                                          | unsp+PKC->unsp+PKC+DNAPK            | 643790 | LOC643790 | kdssdkkvqTgkrqakgkq     |
| IP100554761 | 55   | 52   | unsp+PKC->PKC                            | unsp+PKC->PKC                       | 643790 | LOC643790 | kdssdkkvqTgkrqakgkq     |
| IP100554761 | 82   | 81   | unsp+CKII->CKII                          | unsp+CKII->CKII                     | 643790 | LOC643790 | kdssdkkvqTgkrqakgkq     |
| IP100554761 | 82   | 83   |                                          | ->unsp                              | 643790 | LOC643790 | kdssdkkvqTgkrqakgkq     |
| IP100554777 | 385  | 390  | unsp+CKII->CKII                          | unsp+CKII->CKII                     | 440    | ASNS      | apspekaeeSerlirlelyf    |
| IP100554788 | 81   | 86   | unsp+cdc2+PKA->cdc2+PKA                  | unsp+cdc2+PKA->cdc2+PKA             | 3875   | KRT18     | giqnektrmgSndriasyld    |
| IP100554788 | 111  | 110  | unsp+PKC+PKA->unsp+PKC+PKA+RSK           | unsp+PKC+PKA->unsp+PKC+PKA+RSK      | 3875   | KRT18     | sletenrrieSkirlelkgk    |
| IP100554788 | 131  | 127  | unsp+PKA->unsp+PKA+RSK                   | unsp+PKA->unsp+PKG+PKA+RSK          | 3875   | KRT18     | ekkgqgvrdwShyfkiedrl    |
| IP100554788 | 167  | 168  | INSR->                                   | unsp+PKA                            |        |           |                         |

Table S3

|             |      |      |                                          |                              |        |           |                         |
|-------------|------|------|------------------------------------------|------------------------------|--------|-----------|-------------------------|
| IP100554788 | 426  | 420  | unsp+CKII->unsp                          | Uniprot                      | 3875   | KRT18     | trrivdgkvSetndtkvlrh    |
| IP100554788 | 12   | 15   | unsp+PKC->PKC                            | Uniprot                      | 8342   | HIST1H2BM | vkspavpkkgSkkainkaqkk   |
| IP100554788 | 13   | 15   | unsp+PKC->PKC                            | Uniprot                      | 8342   | HIST1H2BM | vkspavpkkgSkkainkaqkk   |
| IP100554788 | 16   | 15   | unsp+PKC->PKC                            | Uniprot                      | 8342   | HIST1H2BM | vkspavpkkgSkkainkaqkk   |
| IP100554788 | 17   | 15   | unsp+PKC->PKC                            | Uniprot                      | 8342   | HIST1H2BM | vkspavpkkgSkkainkaqkk   |
| IP100554788 | 109  | 113  | unsp->                                   | Uniprot                      | 8342   | HIST1H2BM | vgpelaklvSegtkavtkyt    |
| IP100554788 | 121  | 120  | ->ATM+DNAPK                              |                              | 8342   | HIST1H2BM | havsegtkavTkytsk----    |
| IP100554788 | 121  | 123  | PKC->                                    |                              | 8342   | HIST1H2BM | segtkavtkyTssk-----     |
| IP100554811 | 35   | 27   | ATM+DNAPK->DNAPK                         |                              | 26140  | TTL3      | qaalcenfSqvverhnpke     |
| IP100555744 | 71   | 67   | ->unsp                                   |                              | 9045   | RPL14     | ltdflkphSahqkyvrqaw     |
| IP100555744 | 71   | 72   | unsp->                                   |                              | 9045   | RPL14     | lkfphsahqYvrgawqkadl    |
| IP100555744 | 85   | 84   | PKC->DNAPK                               |                              | 9045   | RPL14     | rgawqkadinTkwaatrwak    |
| IP100555876 | 266  | 274  | unsp+PKA->unsp                           |                              | 730211 | HSP90AASP | lekvvkvvv5nmedprht      |
| IP100555902 | 41   | 40   | ->PKA                                    |                              | 132299 | OCLAD2    | skliihraeSkimreces      |
| IP100556369 | 173  | 168  | unsp+PKC->unsp+PKC+PKA                   |                              | 23049  | SMG1      | reddrdrriaTvqklkefiq    |
| IP100556553 | 252  | 244  | ->cdc2                                   |                              | 22     | ABC87     | lhnldghfiSrtqgalskai    |
| IP100556553 | 252  | 247  | PKC->PKA                                 |                              | 22     | ABC87     | ldlgfhsrqTgalskaidrg    |
| IP100556553 | 252  | 251  | ->ATM+DNAPK                              |                              | 22     | ABC87     | fhlsrtgalskaidrtgrti    |
| IP100604400 | 324  | 321  | unsp->                                   | Uniprot                      | 23174  | ZCCHC14   | hkypvfkqlSmekflstee     |
| IP100604400 | 324  | 329  | CKI+CKII->CKII                           |                              | 23174  | ZCCHC14   | qlsmekflsiTeednkfesi    |
| IP100604590 | 37   | 32   | PKC->                                    |                              | 4831   | NME2      | dtgtmancerTflaipdgvq    |
| IP100604590 | 125  | 124  | unsp+CKI->unsp+DNAPK                     |                              | 4831   | NME2      | vmigertpadSpggtgrdfc    |
| IP100604590 | 189  | 189  | unsp+PKA+RSK->unsp+PKA                   |                              | 4831   | NME2      | rvamkifraSaehkhlyhd     |
| IP100604590 | 189  | 192  | unsp->                                   |                              | 4831   | NME2      | raseehkhlyYldikdrpfid   |
| IP100604590 | 264  | 260  | PKC+cdc2->PKA                            |                              | 4831   | NME2      | iqvgmrihgSdvksaekei     |
| IP100604590 | 264  | 262  | unsp+PKC+cdc2->unsp+cdc2                 |                              | 4831   | NME2      | vgmrihgSdvksaekei       |
| IP100604590 | 268  | 260  | PKC+cdc2->PKC                            |                              | 4831   | NME2      | iqvgmrihgSdvksaekei     |
| IP100604620 | 79   | 76   | unsp+cdk5+p38MAPK->unsp+p38MAPK          |                              | 4691   | NCL       | vspktkavaTpgkkaavtpg    |
| IP100604620 | 79   | 84   | unsp->unsp+p38MAPK                       |                              | 4691   | NCL       | vatpakaavTpgkkaatpa     |
| IP100604620 | 102  | 97   | unsp+PKC->unsp+PKC+PKG                   |                              | 4691   | NCL       | kkaatpakkTvpkavttpg     |
| IP100604620 | 102  | 99   | unsp->                                   |                              | 4691   | NCL       | aatpksaktvTpkavttpgk    |
| IP100604620 | 102  | 105  | PKC->                                    | Uniprot PhosphoELM PhosphoSi | 4691   | NCL       | kktpkpakavTpgkkgatpg    |
| IP100604620 | 102  | 106  | unsp+PKC+cdk5+p38MAPK->unsp+cdk5+p38MAPK | Uniprot PhosphoSite          | 4691   | NCL       | kktpkpakavTpgkkgatpgk   |
| IP100604620 | 109  | 105  | PKC->                                    | Uniprot PhosphoELM PhosphoSi | 4691   | NCL       | kktpkpakavTpgkkgatpgk   |
| IP100604620 | 109  | 106  | unsp+PKC+cdk5+p38MAPK->unsp+cdk5+p38MAPK | Uniprot PhosphoSite          | 4691   | NCL       | kktpkpakavTpgkkgatpgk   |
| IP100604620 | 109  | 113  | unsp+p38MAPK->p38MAPK                    | Uniprot                      | 4691   | NCL       | avtppkggaTpgkalvatpg    |
| IP100604620 | 116  | 113  | unsp+p38MAPK->p38MAPK                    | Uniprot                      | 4691   | NCL       | avtppkggaTpgkalvatpg    |
| IP100604620 | 124  | 121  | GSK3+cdk5+p38MAPK->GSK3+p38MAPK          |                              | 4691   | NCL       | gatpgkalvaTpgkkaapa     |
| IP100604620 | 318  | 319  | cdc2->PKA+cdc2                           |                              | 4691   | NCL       | lfgvgnfnmKsapeitgsid    |
| IP100604620 | 333  | 328  | unsp+PKG+PKA->unsp+PKG+cdc2+PKA          |                              | 4691   | NCL       | ksapkektgSdvfkndiev     |
| IP100604620 | 377  | 386  | PKC->                                    |                              | 4691   | NCL       | kketpkkgSdvksaekei      |
| IP100604620 | 398  | 394  | unsp->                                   |                              | 4691   | NCL       | kdkkderdarTlaknlpykv    |
| IP100604620 | 398  | 402  | unsp->                                   | PhosphoSite                  | 4691   | NCL       | artlaknlpYkvtdelkev     |
| IP100604620 | 403  | 402  | unsp->                                   | PhosphoSite                  | 4691   | NCL       | artlaknlpYkvtdelkev     |
| IP100604620 | 444  | 445  | unsp+CKII->unsp+CKI+CKII                 |                              | 4691   | NCL       | efkteadaekTteekgqtdie   |
| IP100604620 | 467  | 462  | ->INSR                                   | PhosphoSite                  | 4691   | NCL       | teidgrsliYtgekgqngd     |
| IP100604620 | 513  | 510  | PKC->                                    |                              | 4691   | NCL       | etliqvfekaTfikvpqngq    |
| IP100604620 | 572  | 571  | ->PKA                                    |                              | 4691   | NCL       | rgspnarspsktfivkglsie   |
| IP100604620 | 572  | 573  | PKC->unsp+PKC                            |                              | 4691   | NCL       | spnarspsktfivkglsiedt   |
| IP100604620 | 572  | 580  | unsp+PKA+CKII->unsp+CKII                 |                              | 4691   | NCL       | psktfivkglsiedtteeitke  |
| IP100604620 | 577  | 568  | DNAPK->cdc2+DNAPK                        |                              | 4691   | NCL       | qgprgsnarspsktfivkg     |
| IP100604620 | 577  | 571  | ->PKA                                    |                              | 4691   | NCL       | rgspnarspsktfivkglsie   |
| IP100604620 | 577  | 573  | PKC->                                    |                              | 4691   | NCL       | spnarspsktfivkglsiedt   |
| IP100604620 | 577  | 580  | unsp+PKA+CKII->unsp+CKI+CKII             |                              | 4691   | NCL       | psktfivkglsiedtteeitke  |
| IP100604620 | 577  | 583  | unsp+CKII->unsp+CKI+CKII                 |                              | 4691   | NCL       | tlfivkglsiedtteeitkesfd |
| IP100604624 | 109  | 107  | unsp+PKC->PKC                            |                              | 60491  | NIF3L1    | frpmkrtvwnTkwerviral    |
| IP100607584 | 71   | 68   | PKG+cdc2+PKA->cdc2+PKA                   |                              | 10514  | MYBBP1A   | leylgrgpkSemkyaikrli    |
| IP100607584 | 1317 | 1314 | PKC+cdc2->PKC                            |                              | 10514  | MYBBP1A   | nvrsplgkSgakkkaatfr     |
| IP100607584 | 1317 | 1322 | unsp+PKC->unsp+PKC+cdc2                  |                              | 10514  | MYBBP1A   | lqspaklkkaqTlfrtskssk   |
| IP100607591 | 421  | 413  | cdc2->                                   |                              | 10514  | RAP1GDS1  | vteavlkfkSempvqklil     |
| IP100607591 | 421  | 425  | PKC->                                    |                              | 5910   | RAP1GDS1  | mppvqklilgTlrmidaqae    |
| IP100607708 | 5    | 3    | unsp+PKC->                               |                              | 3939   | LDHA      | -----maTlkdgilynl       |
| IP100607708 | 81   | 79   | unsp+PKC->unsp                           |                              | 3939   | LDHA      | slifrtpkivSgkdyntvans   |
| IP100607708 | 222  | 220  | unsp+PKC->PKC+CKII                       |                              | 3939   | LDHA      | slkthpdlgTdkdkeawkeec   |
| IP100607708 | 318  | 319  | PKG+PKA->PKA                             |                              | 3939   | LDHA      | teeearikkSadtviqike     |
| IP100607708 | 318  | 322  | ->CKI                                    |                              | 3939   | LDHA      | eeatpkksadTlwgikelfe    |
| IP100607799 | 48   | 49   | unsp->                                   |                              | 56898  | BDH2      | neskilekYtpgietrldv     |
| IP100607799 | 151  | 149  | unsp+PKC->PKC                            |                              | 56898  | BDH2      | kgvnrvcvrsTkaavilgtk    |
| IP100607799 | 151  | 150  | PKC->                                    |                              | 56898  | BDH2      | gvnrcvystTkaavilgtks    |
| IP100640088 | 231  | 228  | unsp+cdk5->p38MAPK                       |                              | 1460   | CSNK2B    | lqlqaasnfrSpvktir----   |
| IP100640136 | 704  | 702  | unsp+PKC->                               |                              | 64864  | RFK7      | svkkdkvphSgktegstaga    |
| IP100640136 | 704  | 705  | unsp->unsp+CKI                           |                              | 64864  | RFK7      | kdqkvphsgTegstagaqip    |
| IP100641743 | 288  | 293  | PKA->                                    |                              | 3054   | HCFC1     | vathekewkTntlaclnidt    |
| IP100641743 | 813  | 808  | PKC->                                    |                              | 3054   | HCFC1     | ititkvmspTgapaakittav   |
| IP100641743 | 2050 | 2048 | unsp+PKC->                               |                              | 3054   | HCFC1     | ptqrvnwlskSgktsktpka    |
| IP100641743 | 2050 | 2049 | CKI->ATM+CKI+DNAPK                       |                              | 3054   | HCFC1     | atqrvnwlskSgktsktpkan   |
| IP100641743 | 2050 | 2052 | unsp->CKI                                |                              | 3054   | HCFC1     | vrwlqtskSgsktpkanprp    |
| IP100641743 | 2073 | 2070 | PKC->                                    |                              | 3054   | HCFC1     | krpmsspemkSapksksgadq   |
| IP100641743 | 2073 | 2075 | unsp+PKG->unsp                           |                              | 3054   | HCFC1     | spemksapkkSgksgadq----  |
| IP100641743 | 2074 | 2070 | PKC->                                    |                              | 3054   | HCFC1     | krpmsspemkSapksksgadq   |
| IP100641788 | 73   | 69   | unsp+CKI+PKC->unsp+CKI+PKA               |                              | 6631   | SNRPC     | yqkwmeeqaSlidkttaafq    |
| IP100641788 | 73   | 75   | ->PKC                                    |                              | 6631   | SNRPC     | eqagslidktTaaqgqkipp    |
| IP100641829 | 36   | 38   | unsp+PKC+PKA->PKC                        | PhosphoSite                  | 7919   | BAT1      | eaapkvdkvSgysvhsstfrd   |
| IP100641829 | 36   | 39   | INSR+unsp->unsp                          | PhosphoSite                  | 7919   | BAT1      | akkvdkgsvYshssgfrdl     |
| IP100641829 | 36   | 41   | unsp+PKC->CKI                            | PhosphoSite                  | 7919   | BAT1      | gmpqeerslrYqgdfqfrrl    |
| IP100642097 | 237  | 234  | PKC->                                    |                              | 23708  | GSPT2     | mftgmvdkrTlekereake     |
| IP100642097 | 325  | 321  | unsp+CKII->CKII                          |                              | 23708  | GSPT2     | visargefeTgfekggqtre    |
| IP100642097 | 325  | 329  | unsp->                                   |                              | 23708  | GSPT2     | fetgfekggqTrehamlakta   |
| IP100642156 | 486  | 479  | ->cdc2                                   |                              | 124454 | EARS2     | lkkisleglegTksynnmklir  |
| IP100642156 | 486  | 482  | ->PKA                                    |                              | 124454 | EARS2     | lseglegtkySnmvklrmal    |
| IP100642186 | 951  | 956  | PKA->                                    |                              | 9742   | IFT140    | elyvnmkmdkTlwrwwaqyle   |
| IP100642211 | 454  | 457  | PKA->                                    |                              | 6051   | RNRP      | kayvhefrSiladtdfr       |
| IP100642329 | 36   | 34   | PKC->                                    |                              | 9927   | MFN2      | vnsaplkhtTakktingife    |
| IP100642329 | 243  | 245  | unsp->                                   |                              | 9927   | MFN2      | qtekhhfkvSersrpnifi     |
| IP100642374 | 170  | 167  | PKC+CKII->CKII                           |                              | 51377  | UCHL5     | rqgmfeftdkTsakeedafhf   |
| IP100642550 | 649  | 645  | unsp+PKG+cdc2+PKA->unsp+PKA+RSK          |                              | 728118 | FAM22A    | apsrgatridSsskfaagq     |
| IP100642550 | 649  | 647  | unsp+PKC->                               |                              | 728118 | FAM22A    | srgtarldssSskfaaggaa    |
| IP100642550 | 649  | 648  | PKC->CKI+PKA                             |                              | 728118 | FAM22A    | rgtarldssSskfaaggaa     |
| IP100642904 | 104  | 96   | unsp->unsp+PKC                           |                              | 8761   | PABPC4    | wsardpsrkSgvgvniiknl    |
| IP100642904 | 104  | 109  | unsp->                                   |                              | 8761   | PABPC4    | gnvrikndSidnkalytdf     |
| IP100643027 | 892  | 886  | unsp->                                   |                              | 23367  | LARP1     | shelikengTghvhykrrf     |
| IP100643027 | 1010 | 1014 | ->EGFR                                   |                              | 23367  | LARP1     | nlldidklqeYlgkfrlief    |
| IP100643027 | 1017 | 1014 | ->EGFR                                   |                              | 23367  | LARP1     | nlldidklqeYlgkfrlief    |
| IP100643041 | 99   | 97   | unsp+PKC->                               |                              | 221547 | RANP1     | iimfdvtsrvTyknvpnrwhrd  |
| IP100643041 | 159  | 150  | ->cdc2                                   |                              | 221547 | RANP1     | rkknlqyydiSaksynnfekp   |
| IP100643041 | 159  | 155  | ->EGFR                                   | Uniprot PhosphoSite          | 221547 | RANP1     | qydisaksynYnfekpfwla    |
| IP100643435 | 539  | 540  | INSR+unsp->unsp                          | PhosphoSite                  | 55210  | ATAD3A    | erivrmfydkYvlpategkq    |
| IP100643591 | 101  | 99   | ATM+unsp+PKC+DNAPK->ATM+cdc2+DNAPK       |                              | 164    | AP1G1     | gqleekllaSqkftkdnig     |
| IP100643722 | 987  | 172  | PKG+PKA->                                |                              | 164    | AP1G1     | ageveklkSgskttdknyg     |
| IP100643722 | 997  | 995  | unsp+PKC->unsp                           |                              | 8289   | ARID1A    | adgtpktesksskssstttnei  |
| IP100643722 | 997  | 998  | unsp+PKC+PKA->unsp+PKC+cdc2+PKA          |                              | 8289   | ARID1A    | tpktesksskSsstttnekit   |
| IP100643722 | 997  | 999  | unsp+PKA->unsp+PKC+PKA                   |                              | 8289   | ARID1A    | pktesksskSsstttnekit    |
| IP100643722 | 997  | 1001 | unsp->unsp+CKI                           |                              | 8289   | ARID1A    | tesksskssstttnekitkl    |
| IP100643722 | 1007 | 998  | unsp+PKC+PKA->unsp+PKC+cdc2+PKA          |                              | 8289   | ARID1A    | tpktesksskSsstttnekit   |
| IP100643722 | 1007 | 1002 | PKC->                                    |                              | 8289   | ARID1A    | eskskssstTtnetkily      |
| IP100643722 | 1007 | 1003 | unsp+CKII->CKII                          |                              | 8289   | ARID1A    | skskssstTtnetkilye      |
| IP100643722 | 1007 | 1004 | PKC->                                    |                              | 8289   | ARID1A    | yskksstTtnetkilye       |
| IP100643722 | 1612 | 1609 | PKC->                                    |                              | 8289   | ARID1A    | tszskspffmSgmkmekagpp   |
| IP100643722 | 1905 | 1908 | PKA->PKG                                 |                              | 8289   | ARID1A    | pdgdppekrtatmdmlstrs    |
| IP100643722 | 1905 | 1910 | PKC->                                    |                              | 8289   | ARID1A    | dgdppekrtatmdmlstrs     |
| IP100643920 | 6    | 3    | PKC->                                    |                              | 7086   | TKT       | -----meSyhkdqdklq       |
| IP100643920 | 144  | 146  | ->PKC                                    |                              | 7086   | TKT       | aytgkyfkaSlpsswdysyr    |
| IP100643920 | 144  | 149  | unsp->                                   |                              | 7086   | TKT       | gkyfdkaslpSswdysryvc    |
| IP100644055 | 369  | 363  | unsp+CKI+CKII->unsp+CKII                 |                              | 10236  | HNRNPR    | ttvteielekSfsefgklerv   |
| IP100644055 | 369  | 365  | CKI->unsp+CKI                            |                              | 10236  | HNRNPR    | vteielekSfsefgklerv     |
| IP100644712 | 31   | 33   | unsp+PKC->unsp                           |                              | 2547   | XRC6C     | nleasdykySgrdsilfivd    |
| IP100644712 | 317  | 319  | ATM+unsp+PKG->ATM                        |                              | 2547   | XRC6C     | gllpsdtkrSqyysrqiil     |
|             |      |      | ATM+unsp+PKG->ATM+unsp+DNAPK             |                              |        |           |                         |

Table S3

|             |      |      |                                           |                                                |                     |        |          |                          |
|-------------|------|------|-------------------------------------------|------------------------------------------------|---------------------|--------|----------|--------------------------|
| IP100644712 | 317  | 322  | INSR->EGFR                                |                                                |                     | 2547   | XRCC6    | lpsdtkrsqYsqrilleke      |
| IP100644712 | 317  | 324  | ->ATM                                     |                                                |                     | 2547   | XRCC6    | sdtksrsqYgSqrillekeet    |
| IP100644712 | 461  | 455  | unsp+cdk5+p38MAPK->unsp+p38MAPK           | unsp+cdk5+p38MAPK->unsp+p38MAPK                | Uniprot PhosphoSite | 2547   | XRCC6    | kmptfekimaTpeqvkgmkmai   |
| IP100644712 | 542  | 541  |                                           | unsp+PKC->ATM+unsp+PKC                         |                     | 2547   | XRCC6    | ppdynpegkvTkrkhdnegg     |
| IP100644712 | 544  | 541  | unsp+PKC->unsp                            |                                                |                     | 2547   | XRCC6    | ppdynpegkvTkrkhdnegg     |
| IP100644712 | 553  | 552  | unsp+PKC->PKC                             |                                                |                     | 2547   | XRCC6    | krkhdneggSkprkveysee     |
| IP100644712 | 556  | 552  | unsp+PKC->unsp                            |                                                |                     | 2547   | XRCC6    | krkhdneggSkprkveysee     |
| IP100644712 | 556  | 559  | INSR+unsp->                               | INSR+unsp->                                    |                     | 2547   | XRCC6    | gsgskrpvkeVseeekthsis    |
| IP100645078 | 671  | 668  | PKC->CKII                                 |                                                |                     | 7317   | UBA1     | qaenvnqvITdpkfvertlr     |
| IP100645078 | 671  | 676  | unsp+PKC->unsp                            | unsp+PKC->unsp                                 |                     | 7317   | UBA1     | yltdpkfverTlrIagtaple    |
| IP100645078 | 980  | 981  |                                           | CKII->unsp+CKII                                |                     | 7317   | UBA1     | tlkfIdfyfKtehkleitmls    |
| IP100645616 | 507  | 511  | unsp+PKA->PKA                             |                                                |                     | 414189 | AGA6P    | wpvelrkvmsSivndiansiw    |
| IP100645616 | 530  | 532  | unsp+PKC+PKG->unsp+PKC                    | unsp+PKC+PKG->unsp+PKC                         |                     | 414189 | AGA6P    | egsgsqgtkpSektstreeker   |
| IP100645616 | 530  | 535  | unsp+PKC+CKII->unsp+CKI+PKC+CKII          | unsp+PKC+PKG->unsp                             |                     | 414189 | AGA6P    | sqgtkpsekSektstreekerwiv |
| IP100645643 | 398  | 394  | unsp+PKC->unsp                            | unsp+PKC+CKII->unsp+CKII                       |                     | 80114  | BIC1     | ikokpkpskSVsvksverma     |
| IP100646058 | 475  | 478  | unsp+PKC->cdc2                            | unsp+PKC->PKC+cdc2                             |                     | 6294   | SAFB     | htkelhgkmiSvekaknepvg    |
| IP100646058 | 607  | 601  | unsp->unsp+PKA                            |                                                |                     | 6294   | SAFB     | drksasrekrSVsvdfkvkep    |
| IP100646058 | 607  | 604  | CKI+PKC->PKC                              |                                                |                     | 6294   | SAFB     | sasrekrsvSVdfkvkepks     |
| IP100646377 | 944  | 952  | unsp->INSR+unsp                           | unsp->INSR+unsp                                |                     | 8672   | EIF4G3   | fekakprmdqYfnmekivke     |
| IP100646645 | 1647 | 1655 | PKA->cdc2                                 |                                                |                     | 23064  | SETX     | aqkpvvgemknScnivhpqspn   |
| IP100646689 | 78   | 76   | unsp->                                    |                                                |                     | 84817  | TXNDC17  | fiycvqgekPvwkdpnnndfrk   |
| IP100646762 | 42   | 40   | PKC->                                     | PKC->                                          |                     | 11164  | NUDT5    | klektympdYgktrrmkeet     |
| IP100646839 | 559  | 555  | ->EGFR                                    | ->EGFR                                         |                     | 728689 | EIF3CL   | savimernfYiyakdrtdri     |
| IP100646839 | 559  | 557  | ->unsp                                    | ->unsp                                         |                     | 728689 | EIF3CL   | vmerckcyYakdrtdri        |
| IP100646909 | 401  | 399  | unsp->                                    |                                                |                     | 51807  | TUBA8    | arldhfdlmYakrafvhwyy     |
| IP100646917 | 23   | 18   | unsp+PKC->unsp                            | unsp+PKC->unsp                                 |                     | 11051  | NUDT21   | rsqgtwprgvTqfgnkyyiqat   |
| IP100646917 | 23   | 24   | unsp+EGFR->                               | unsp+EGFR->EGFR                                |                     | 11051  | NUDT21   | prgvtqfgnkYiqqtkpitie    |
| IP100646917 | 23   | 28   | unsp+PKC->unsp                            | unsp+PKC->unsp                                 |                     | 11051  | NUDT21   | tafgnkyyiqqTkpIrtlerin   |
| IP100646917 | 29   | 24   | unsp+EGFR->unsp                           | unsp+EGFR->unsp                                |                     | 11051  | NUDT21   | prgvtqfgnkYiqqtkpitie    |
| IP100646917 | 29   | 28   | unsp+PKC->unsp+PKA                        | unsp+PKC->unsp+DNAPK                           |                     | 11051  | NUDT21   | tafgnkyyiqqTkpIrtlerin   |
| IP100646917 | 56   | 58   | unsp+cdc2->cdc2                           |                                                |                     | 11051  | NUDT21   | gkpeylekdsSvaarfqmm      |
| IP100646917 | 56   | 59   | PKC->                                     |                                                |                     | 11051  | NUDT21   | ikeplyekdsSvaarfqmm      |
| IP100647217 | 51   | 54   | ->CKII                                    | ->CKII                                         |                     | 23517  | SKIV2L2  | agkrfdgkqSestnngknkr     |
| IP100647217 | 51   | 56   | unsp->                                    | unsp->                                         |                     | 23517  | SKIV2L2  | krfdgkqseStnngknkrdv     |
| IP100647217 | 51   | 57   | ->CKI                                     | ->CKI                                          |                     | 23517  | SKIV2L2  | rfdgkqseStnngknkrdv      |
| IP100647217 | 79   | 87   | CKII->cdc2+CKII                           |                                                |                     | 23517  | SKIV2L2  | gkpkriesiTedisladlmp     |
| IP100647217 | 198  | 203  |                                           | unsp+EGFR->unsp                                |                     | 23517  | SKIV2L2  | alsnkqyremYeeqdgvglimt   |
| IP100647491 | 512  | 513  | unsp+PKC->ATM+unsp+PKC                    |                                                |                     | 9692   | KIAA0391 | dhkacldpakTqrffkwagq     |
| IP100654555 | 91   | 88   | unsp+PKC->PKC                             |                                                |                     | 4839   | NOP2     | pkgisagavqTagkkgapsif    |
| IP100654555 | 91   | 96   | unsp+PKA->                                | unsp+PKA->                                     |                     | 4839   | NOP2     | vqtqagkqpSifnarpkkr      |
| IP100654555 | 682  | 679  | ->PKA                                     | ->PKA                                          |                     | 4839   | NOP2     | lqkqtkpkasSfaklnjsgk     |
| IP100654731 | 858  | 854  | unsp->unsp+PKA                            |                                                |                     | 23586  | DDX58    | srphpkpqgSfsekakrfic     |
| IP100654731 | 909  | 906  | PKC->                                     |                                                |                     | 23586  | DDX58    | diatgvqtlYSkwkdhfeki     |
| IP100654777 | 253  | 248  | CKI->CKI+p38MAPK                          | CKI->                                          |                     | 8665   | EIF3F    | vpgrtmvgmfTpltvkiyayyd   |
| IP100654777 | 253  | 251  | unsp+PKC->PKC                             | unsp+PKC->PKC                                  |                     | 8665   | EIF3F    | rtmvgmfTpltvkiyayydter   |
| IP100656021 | 360  | 351  | ->cdc2                                    |                                                |                     | 55275  | VP553    | vklilfaqrTnrefglakr      |
| IP100656021 | 360  | 363  | unsp+PKA->PKA                             | unsp+PKA->PKA                                  |                     | 55275  | VP553    | nfegflakrTSgcttdgttk     |
| IP100657687 | 371  | 368  | PKC->                                     | PKC->                                          | Uniprot             | 54443  | ANL5     | skdskstpggYgktpflterf    |
| IP100657967 | 52   | 48   | unsp+PKC->unsp                            | unsp+PKC->unsp                                 |                     | 65979  | PHACTR4  | tpptkkesSfgkfkprpwk      |
| IP100658023 | 198  | 197  | unsp->                                    | unsp->                                         |                     | 5781   | PTPN11   | fdsitdlvehYknpmvvetig    |
| IP100658023 | 199  | 197  | unsp->                                    |                                                |                     | 5781   | PTPN11   | fdsitdlvehYknpmvvetig    |
| IP100658023 | 280  | 279  | INSR+unsp->INSR+unsp+EGFR                 | INSR+unsp->INSR+unsp+EGFR                      | PhosphoSite         | 5781   | PTPN11   | qrqenknknYknlpfdhtr      |
| IP100658210 | 121  | 119  | ->unsp                                    | ->unsp                                         |                     | 57599  | WDR48    | cmstrthkdYvkalayakdk     |
| IP100658210 | 214  | 210  | ->PKA                                     | ->PKA                                          |                     | 57599  | WDR48    | caklmklghTdnvkalInnr     |
| IP100658210 | 578  | 574  | PKC->                                     | PKC->                                          |                     | 57599  | WDR48    | kipflylphaSsgaktikddr    |
| IP100658210 | 581  | 579  | unsp+PKC->                                | unsp+PKC->                                     |                     | 57599  | WDR48    | lqphassgakTlkdrIsaad     |
| IP100658210 | 581  | 586  |                                           | unsp+PKA->unsp+PKG+PKA                         |                     | 57599  | WDR48    | gakttkdrIsadmlqyrvkr     |
| IP100658210 | 581  | 588  | ->cdc2                                    |                                                |                     | 57599  | WDR48    | kttkdrIsadmlqyrvkrme     |
| IP100718888 | 179  | 183  | unsp+PKA+RSK->unsp+PKA                    | unsp+PKA+RSK->unsp+PKA                         |                     | 5634   | PRPS2    | pdagagkrvTSiadrfnvefa    |
| IP100719285 | 1763 | 1762 | unsp->unsp+DNAPK                          | unsp->ATM+unsp+DNAPK                           |                     | 11113  | CIT      | vlvrynenISkyckrieet      |
| IP100719680 | 176  | 180  | PKC->                                     |                                                |                     | 8943   | AP3D1    | mykvfkypeSrpafprkrie     |
| IP100719752 | 213  | 212  |                                           | CKI+PKC->CKI+PKC+DNAPK                         |                     | 8662   | EIF3B    | klknvhihkfSfgkitndfy     |
| IP100719752 | 213  | 218  | PKG->                                     |                                                |                     | 8662   | EIF3B    | hifksfgkiTndfypeedgk     |
| IP100719752 | 436  | 432  | PKG->PKG+PKA                              |                                                |                     | 8662   | EIF3B    | ssahwpfkvShdgkffarmt     |
| IP100719752 | 729  | 728  | ->PKA                                     |                                                |                     | 8662   | EIF3B    | kqikldlkyYSkifeqkdris    |
| IP100740057 | 1773 | 1769 | PKC->                                     | PKC->                                          |                     | 256006 | ANKRD31  | twmyawskvYgkellryv       |
| IP100740057 | 1773 | 1770 | unsp->                                    | unsp->                                         |                     | 256006 | ANKRD31  | twmyawskvYgkellryv       |
| IP100740961 | 175  | 167  | unsp+PKC->unsp+PKC+cdc2                   |                                                |                     | 26173  | INTS1    | algsgqaaneSktastllkpa    |
| IP100740961 | 175  | 171  | PKC->PKA                                  | PKC->PKA                                       |                     | 26173  | INTS1    | kqganekstaStllkpapspl    |
| IP100740961 | 175  | 172  | PKC+cdc2->cdc2                            | PKC+cdc2->cdc2                                 |                     | 26173  | INTS1    | qganekstasTllkpapsplg    |
| IP100742682 | 457  | 453  | PKC->PKA                                  | PKC->PKA                                       |                     | 7175   | TPR      | eyeraqkavaSlsvkleqamk    |
| IP100742682 | 457  | 455  | unsp+PKC->PKC                             | unsp+PKC->                                     |                     | 7175   | TPR      | eraqkavasISvkleqamkei    |
| IP100742682 | 713  | 712  |                                           | unsp+PKC->unsp+DNAPK                           |                     | 7175   | TPR      | eqvtdlrsqTktistqlfas     |
| IP100742682 | 713  | 715  | cdc2+PKA->cdc2                            | cdc2+PKA->cdc2                                 |                     | 7175   | TPR      | tdlrsqtkIStdglfaskry     |
| IP100742682 | 713  | 716  | DNAPK->ATM+cdc2+DNAPK                     | DNAPK->cdc2+DNAPK                              |                     | 7175   | TPR      | dlrsqtkIStdglfaskrye     |
| IP100742682 | 723  | 716  | DNAPK->cdc2+DNAPK                         | DNAPK->cdc2+DNAPK                              |                     | 7175   | TPR      | dlrsqtkIStdglfaskrye     |
| IP100742682 | 723  | 722  | PKC->                                     | PKC->DNAPK                                     |                     | 7175   | TPR      | tkistqldfaSKryemldnrv    |
| IP100742682 | 748  | 750  |                                           | PKC->                                          |                     | 7175   | TPR      | tslhermqkiTattqkqeei     |
| IP100742682 | 748  | 752  | PKC->                                     |                                                |                     | 7175   | TPR      | lhermqkitaTtqkqeeint     |
| IP100742682 | 755  | 750  | PKC->PKG                                  | PKC->PKG                                       |                     | 7175   | TPR      | tslhermqkiTattqkqeei     |
| IP100742682 | 755  | 752  | PKC->                                     | PKC->                                          |                     | 7175   | TPR      | lhermqkitaTtqkqeeint     |
| IP100742682 | 755  | 753  | unsp+PKC->                                | unsp+PKC->                                     |                     | 7175   | TPR      | hernqkitaTtqkqeeintm     |
| IP100742743 | 1672 | 1670 | unsp+PKC->PKC                             | unsp+PKC->                                     |                     | 7158   | TP53BP1  | esprasmprvSgkrrltisee    |
| IP100743143 | 112  | 119  | unsp+CKII->unsp+cdc2+CKII                 | unsp+CKII->unsp+cdc2+CKII                      |                     | 51147  | ING4     | adlkekqiesSdysssgkkg     |
| IP100743143 | 127  | 119  | unsp+CKII->unsp+cdc2+CKII                 |                                                |                     | 51147  | ING4     | adlkekqiesSdysssgkkg     |
| IP100743143 | 127  | 123  | unsp+PKC->unsp                            | unsp+PKC->unsp                                 |                     | 51147  | ING4     | ekqiesdydSsssgkkgkgr     |
| IP100743143 | 127  | 124  | unsp+PKC+cdc2->cdc2                       | unsp+PKC+cdc2->unsp                            |                     | 51147  | ING4     | kqiesdydSsssgkkgkgrtq    |
| IP100743143 | 127  | 125  | unsp+CKI+PKC->unsp+CKI+PKC+cdc2           | unsp+CKI+PKC+cdc2->ATM+unsp+CKI+PKC+cdc2+DNAPK |                     | 51147  | ING4     | kqiesdydSsssgkkgkgrtq    |
| IP100743143 | 127  | 126  | PKC->                                     | unsp+PKC+cdc2->cdc2                            |                     | 51147  | ING4     | kqiesdydSsssgkkgkgrtq    |
| IP100743143 | 129  | 124  | unsp+PKC+cdc2->cdc2                       | unsp+PKC+cdc2->cdc2                            |                     | 51147  | ING4     | kqiesdydSsssgkkgkgrtq    |
| IP100743143 | 129  | 126  | unsp+CKI+PKC+cdc2->unsp+PKC+cdc2          |                                                |                     | 51147  | ING4     | kqiesdydSsssgkkgkgrtq    |
| IP100743143 | 130  | 125  | unsp+CKI+PKC+cdc2->unsp+CKI+PKC           | unsp+CKI+PKC->unsp+PKC                         |                     | 51147  | ING4     | kqiesdydSsssgkkgkgrtq    |
| IP100743143 | 130  | 126  | unsp+CKI+PKC->unsp+PKC                    | unsp+CKI+PKC->unsp+PKC+cdc2                    |                     | 51147  | ING4     | kqiesdydSsssgkkgkgrtq    |
| IP100743143 | 131  | 125  | unsp+CKI+PKC+cdc2->unsp+PKC+cdc2          | unsp+CKI+PKC+cdc2->unsp+PKC+cdc2               |                     | 51147  | ING4     | kqiesdydSsssgkkgkgrtq    |
| IP100743143 | 131  | 134  | unsp+PKC->unsp+PKC+PKG                    |                                                |                     | 51147  | ING4     | sssgkkgkgrTqkekkaarar    |
| IP100743143 | 146  | 145  |                                           | unsp+PKC+RSK->ATM+unsp+PKC+DNAPK+RSK           |                     | 51147  | ING4     | qkekkaararSgknsdeap      |
| IP100743143 | 148  | 145  | unsp+PKC+RSK->unsp+PKA                    | unsp+PKC+RSK->unsp+PKC                         |                     | 51147  | ING4     | qkekkaararSgknsdeap      |
| IP100743143 | 156  | 157  | ->PKC                                     | ->PKC                                          |                     | 51147  | ING4     | gknsdeapTaqkiklrvrt      |
| IP100743143 | 160  | 168  | unsp+PKA->unsp                            | unsp+PKA->unsp                                 |                     | 51147  | ING4     | akqiklrvrtSpeygmprsvf    |
| IP100743157 | 790  | 789  | ->PKA                                     | unsp+PKC->unsp                                 |                     | 54904  | WHSC1L1  | wrkptalifeSkgfrcpohcc    |
| IP100743335 | 704  | 708  | unsp->                                    | ->ATM+DNAPK                                    |                     | 4641   | MYO1C    | vrtlygkpeeYkmgrtfiir     |
| IP100743509 | 168  | 169  |                                           | unsp+GSK3+cdk5+p38MAPK->unsp+cdk5+p38MAPK      |                     | 1871   | E2F3     | aalrspdspTKpspektry      |
| IP100743509 | 171  | 166  | unsp+GSK3+cdk5+p38MAPK->unsp+GSK3+p38MAPK | unsp+GSK3+cdk5+p38MAPK->unsp+GSK3+p38MAPK      |                     | 1871   | E2F3     | kgraalrspDSpTKpspek      |
| IP100743509 | 171  | 172  | unsp+GSK3->unsp+GSK3+p38MAPK              | unsp+GSK3+cdk5+p38MAPK->unsp+GSK3+p38MAPK      |                     | 1871   | E2F3     | rspdspTKpSpspektrydts    |
| IP100743509 | 176  | 172  | unsp+GSK3->unsp+GSK3+cdk5                 | unsp+GSK3->unsp+GSK3+cdk5                      |                     | 1871   | E2F3     | rspdspTKpSpspektrydts    |
| IP100743509 | 176  | 174  | unsp->                                    | unsp->                                         |                     | 1871   | E2F3     | psdpTKpSpspektrydtslg    |
| IP100743509 | 176  | 179  | INSR+unsp->                               | INSR+unsp->unsp                                | PhosphoSite         | 1871   | E2F3     | tkpspektrydtslglltkk     |
| IP100743509 | 176  | 181  | unsp+PKA->unsp                            | unsp+PKA->unsp                                 |                     | 1871   | E2F3     | kpspektrydtslglltkk      |
| IP100743594 | 372  | 369  | PKC->                                     | PKC->                                          |                     | 14443  | ANL5     | slskstpggYgktpflterf     |
| IP100743879 | 409  | 405  | PKC->PKA                                  | PKC->PKA                                       |                     | 89953  | KLCA     | nartknkiasCylkqgylvae    |
| IP100743879 | 409  | 413  | unsp+EGFR->                               |                                                |                     | 89953  | KLCA     | lascylkqgYaeatlykei      |
| IP100744507 | 102  | 106  | unsp->                                    |                                                |                     | 1457   | CSNK2A1  | tladivkdpvSrtpalvehfv    |
| IP100744507 | 102  | 108  | p38MAPK->                                 |                                                |                     | 1457   | CSNK2A1  | adivkdpvrsTpalvehnn      |
| IP100744692 | 219  | 216  | PKC->                                     | PKC->                                          |                     | 6888   | TALDO1   | yepledpgvsvTvtkiynykk    |
| IP100744692 | 219  | 218  | PKC->                                     | PKC->                                          |                     | 6888   | TALDO1   | pledpgvsvTkiynykkfs      |
| IP100744692 | 286  | 282  | CKII->unsp+CKII                           | CKII->unsp+CKII                                |                     | 6888   | TALDO1   | pvisakaqaSdelekhdek      |
| IP100744711 | 264  | 266  | PKG->                                     | PKG->                                          |                     | 87178  | PNP1     | igagilvkeTgvtkrtpqkl     |
| IP100744711 | 275  | 278  | unsp->                                    | unsp->                                         |                     | 87178  | PNP1     | vtktzpqklTpspeivythi     |
| IP100744711 | 275  | 280  | unsp->                                    | unsp->                                         |                     | 87178  | PNP1     | ktzpqlkftSpeivythki      |
| IP100744711 | 285  | 278  | ->p38MAPK                                 |                                                |                     | 87178  | PNP1     | vtktzpqklTpspeivythi     |
| IP100744711 | 285  | 280  | unsp->                                    | unsp->                                         |                     | 87178  | PNP1     | ktzpqlkftSpeivythki      |
| IP100744711 | 285  | 287  | PKC->unsp+PKC                             | PKC->unsp+PKC                                  |                     | 87178  | PNP1     | ftpspeivyThklamerlya     |
| IP100744711 | 289  | 287  | PKC->                                     | PKC->                                          |                     | 87178  | PNP1     | ftpspeivyThklamerlya     |
| IP100744711 | 591  | 59   |                                           |                                                |                     |        |          |                          |

Table S3

|             |      |      |                                          |                                          |        |          |                                |
|-------------|------|------|------------------------------------------|------------------------------------------|--------|----------|--------------------------------|
| IP100745087 | 200  | 203  | PKC->PKC+cdc2                            | PKC->PKC+cdc2                            | 79843  | FAM124B  | pgmsvdpkesVqlqfkvgeig          |
| IP100745266 | 465  | 469  | PKC->                                    | PKC->PKC+cdc2                            | 51386  | E1F3L    | tirslfilytTmrvaklagfi          |
| IP100745568 | 207  | 208  | ->cdc2+CKII                              | ->cdc2+CKII                              | 261726 | TIPRL    | dtrlyheadkTymlyreysre          |
| IP100745568 | 207  | 209  | INSR->                                   | INSR->                                   | 261726 | TIPRL    | trlyheadkTymlyreysre           |
| IP100745793 | 73   | 69   | unsp+PKG->unsp+PKG+PKA                   |                                          | 891    | CCNB1    | knsmnkaakspatgkvdkkl           |
| IP100745793 | 73   | 71   | PKC->                                    |                                          | 891    | CCNB1    | pmkkaakpsaTgkvdkklpk           |
| IP100745872 | 223  | 217  |                                          | PKC->                                    | 213    | ALB      | delfdegkasSakgrlrcasl          |
| IP100745872 | 229  | 226  | PKC->PKA                                 | unsp+PKC->unsp+PKC+cdc2                  | 213    | ALB      | ssakgrlrcaslqkgrfgeraf         |
| IP100745872 | 438  | 436  | unsp+PKC+cdc2->cdc2                      | PKC->PKC+PKA                             | 213    | ALB      | kfqallrvyTkvqvqvst             |
| IP100745872 | 499  | 504  | PKA->                                    | unsp+PKC+cdc2->cdc2                      | 213    | ALB      | sdrtvctcteSlvnrpcfsa           |
| IP100746165 | 81   | 79   | unsp+PKC->                               | unsp+PKC->                               | 9948   | WDR1     | sgflyasgdvSgklrvdttq           |
| IP100746165 | 115  | 114  |                                          | ->DNAPK                                  | 9948   | WDR1     | kikdiawtedSkriavvegr           |
| IP100746165 | 180  | 184  | PKC->                                    |                                          | 9948   | WDR1     | fegppkfrTtjgdsrfrnc            |
| IP100746165 | 182  | 184  |                                          | PKC->                                    | 9948   | WDR1     | fegppkfrTtjgdsrfrnc            |
| IP100746165 | 480  | 478  | unsp+PKC->                               | PKC->                                    | 9948   | WDR1     | nvrlslylgtTlkdgedkilea         |
| IP100746251 | 12   | 15   | unsp+PKC->PKC                            | unsp+PKC->PKC                            | 337874 | Uniprot  | HIST2H2BDakfapapkkGskkavtkaaqk |
| IP100746251 | 13   | 15   | unsp+PKC->PKC                            | unsp+PKC->PKC                            | 337874 | Uniprot  | HIST2H2BDakfapapkkGskkavtkaaqk |
| IP100746310 | 7    | 4    | PKC->                                    | PKC->                                    | 3159   | HMGAI    | -----mseSsksssqplak            |
| IP100746310 | 7    | 5    | unsp+PKC->cdc2                           | unsp+PKC->                               | 3159   | HMGAI    | -----mseSsksssqplak            |
| IP100746310 | 7    | 6    | unsp+PKC->unsp+DNAPK                     | unsp+PKC->unsp+DNAPK                     | 3159   | HMGAI    | -----mseSsksssqplak            |
| IP100746310 | 7    | 8    | unsp->                                   | unsp->                                   | 3159   | HMGAI    | -----mseSsksssqplak            |
| IP100746310 | 7    | 7    | ATM+unsp+DNAPK->ATM+PKC+DNAPK            | unsp->                                   | 3159   | HMGAI    | -----mseSsksssqplak            |
| IP100746310 | 15   | 14   |                                          | unsp->ATM+unsp+DNAPK                     | 3159   | HMGAI    | -----mseSsksssqplak            |
| IP100746310 | 23   | 21   | unsp->                                   | unsp->                                   | 3159   | HMGAI    | -----mseSsksssqplak            |
| IP100746310 | 31   | 36   |                                          | unsp+GSK3->unsp+GSK3+p38MAPK             | 3159   | HMGAI    | -----mseSsksssqplak            |
| IP100746310 | 46   | 44   | ATM+unsp+DNAPK->ATM+unsp+cdc2+CKII+DNAPK |                                          | 3159   | HMGAI    | -----mseSsksssqplak            |
| IP100746310 | 46   | 53   | unsp+GSK3+cdk5->unsp+GSK3+cdk5+p38MAPK   |                                          | 3159   | HMGAI    | -----mseSsksssqplak            |
| IP100746310 | 55   | 53   | unsp+GSK3+cdk5->GSK3+cdk5+p38MAPK        | unsp+GSK3+cdk5->GSK3+cdk5+p38MAPK        | 3159   | HMGAI    | -----mseSsksssqplak            |
| IP100746310 | 55   | 64   | unsp+PKC+PKG+PKA->unsp+PKC+PKG+cdc2+PKA  | unsp+PKC+PKG+PKA->unsp+PKC+PKG+cdc2      | 3159   | HMGAI    | -----mseSsksssqplak            |
| IP100746310 | 62   | 64   | unsp+PKC+PKG+PKA->unsp+PKC               | unsp+PKC+PKG+PKA->unsp+PKC               | 3159   | HMGAI    | -----mseSsksssqplak            |
| IP100746310 | 65   | 64   | unsp+PKC+PKG+PKA->unsp+PKC+PKA           | unsp+PKC+PKG+PKA->unsp+PKG+DNAPK         | 3159   | HMGAI    | -----mseSsksssqplak            |
| IP100746351 | 922  | 916  | ->cdc2                                   | ->cdc2                                   | 22894  | DIS3     | kvkvkmlkdsSlnglqkirms          |
| IP100746412 | 1392 | 1395 | unsp->                                   | ->cdc2                                   | 9169   | SFRS2IP  | qevklaikpfYqndkikkee           |
| IP100746655 | 689  | 684  | ->PKA                                    | ->PKA                                    | 23344  | ESY1     | rflglvkgkSDpyvklklag           |
| IP100746655 | 827  | 830  | unsp->unsp+GSK3                          | unsp->unsp+p38MAPK                       | 23344  | ESY1     | lplrgtkhlSpaytlvtgds           |
| IP100746777 | 366  | 364  | unsp->                                   | unsp->                                   | 642443 | ADH5P4   | einkafelmhSgksirtvki           |
| IP100746777 | 366  | 367  | unsp+PKC->unsp+CKI+PKC                   | unsp+PKC->PKC                            | 642443 | ADH5P4   | kafelmhsgkSirtvki---           |
| IP100746777 | 366  | 370  | PKC->                                    |                                          | 642443 | ADH5P4   | elmhsgksirtvki-----            |
| IP100746934 | 1084 | 1077 | unsp+PKC->unsp+PKC+cdc2                  |                                          | 23352  | UBR4     | hasllelalsTbkcsvkydv           |
| IP100746934 | 1084 | 1081 | PKC->PKG+PKA                             | PKC->PKG+PKA                             | 23352  | UBR4     | lelasttkSavkydvveive           |
| IP100746934 | 1084 | 1082 | unsp+PKC->PKC                            | unsp+PKC->                               | 23352  | UBR4     | lelasttkSavkydvveive           |
| IP100747810 | 471  | 465  | INSR+unsp+EGFR->unsp+EGFR                | INSR+unsp+EGFR->unsp+EGFR                | 6624   | FSCN1    | pvdfefcedYnkvaivggr            |
| IP100748360 | 819  | 823  | unsp+PKC->PKC                            | unsp+PKC->PKC                            | 54914  | KIAA1797 | ipnflkmyeTnkaglpklp            |
| IP100748532 | 616  | 615  | PKC->PKC+DNAPK                           | PKC->PKC+DNAPK                           | 8202   | NCOA3    | gaenqrgpleSgkhkklqll           |
| IP100748532 | 619  | 615  | PKC->                                    | PKC->unsp+PKC                            | 8202   | NCOA3    | gaenqrgpleSgkhkklqll           |
| IP100749113 | 179  | 174  | unsp+PKC->unsp                           | unsp+PKC->PKC                            | 1854   | DUT      | sgcygrvaprSglaakhfidv          |
| IP100749237 | 14   | 17   | INSR+unsp+EGFR->                         | INSR+unsp+EGFR->SRC+unsp                 | 9556   | C14orf2  | ynlwmipmkpyYtkvyqeiwg          |
| IP100749406 | 10   | 6    | PKC->                                    |                                          | 80176  | SPSB1    | -----mgkvTggiktdvmsd           |
| IP100749406 | 10   | 11   | ->unsp                                   | ->unsp                                   | 80176  | SPSB1    | mgkvTggiktdvmsd                |
| IP100759562 | 235  | 240  | unsp+PKA->PKA                            | unsp+PKA->PKA                            | 54890  | ALKBH5   | ckfgrgpinSavpilsprv            |
| IP100759691 | 496  | 497  | unsp+PKC->unsp+CKI+PKC                   |                                          | 676    | BRDT     | mceqmrlikekSkrapkkrkq          |
| IP100759749 | 503  | 500  | unsp->                                   | unsp->                                   | 8505   | PARG     | ragevvpkpfThykdldwnkh          |
| IP100761080 | 154  | 149  | unsp+PKC+cdc2->unsp+cdc2                 | unsp+PKC+cdc2->cdc2                      | 23286  | WWC1     | lgsqsvlsvsgSssskypdei          |
| IP100761080 | 154  | 150  |                                          | ->unsp                                   | 23286  | WWC1     | lgsqsvlsvsgSssskypdei          |
| IP100761080 | 154  | 151  | unsp->                                   |                                          | 23286  | WWC1     | lgsqsvlsvsgSssskypdei          |
| IP100761080 | 154  | 152  | unsp+PKC+cdc2->cdc2                      | unsp+PKC+cdc2->cdc2                      | 23286  | WWC1     | lgsqsvlsvsgSssskypdei          |
| IP100761080 | 154  | 153  | unsp+CKII+cdc2->unsp+CKI+cdc2+DNAPK      | unsp+CKII+cdc2->ATM+unsp+CKII+cdc2+DNAPK | 23286  | WWC1     | lgsqsvlsvsgSssskypdei          |
| IP100782935 | 118  | 118  | unsp+CKII->CKII                          |                                          | 84289  | ING5     | asdlkklmkgSfessgprgl           |
| IP100782935 | 154  | 148  | unsp+CKI+PKB+RSK->unsp+PKB+PKA+RSK       | unsp+CKI+PKB+RSK->unsp+PKB+PKA+RSK       | 84289  | ING5     | rsgrgrgrTSeedptkkkhh           |
| IP100782950 | 614  | 607  | unsp->unsp+PKA                           | unsp->unsp+PKA                           | 5587   | PRKD1    | givyvgvghkrTgrdvaiikid         |
| IP100782966 | 1350 | 1346 | CKI+PKC->CKI                             |                                          | 64397  | ZFP106   | qaesttsaeTgskkkkkllr           |
| IP100782966 | 1350 | 1349 |                                          | unsp+PKC->unsp+PKC+DNAPK                 | 64397  | ZFP106   | sttsaetrgSkkkkkkkllr           |
| IP100782966 | 1358 | 1360 | unsp+PKC+PKA->unsp+PKC                   | unsp+PKC+PKA->unsp+PKC                   | 64397  | ZFP106   | kkkkkkkkkSlraahpyns            |
| IP100782992 | 169  | 172  | unsp+cdc2->cdc2                          | unsp+cdc2->cdc2                          | 23524  | SRRM2    | qaapeppkpySlvresssrs           |
| IP100782992 | 169  | 177  | unsp+PKA->unsp+cdc2+PKA                  |                                          | 23524  | SRRM2    | ppkpyslvrsSsssrptpkp           |
| IP100782992 | 1186 | 1188 |                                          | p38MAPK->                                | 23524  | SRRM2    | asprprkklkSpfpvdrpds           |
| IP100782992 | 1467 | 1460 | unsp->unsp+cdc2                          |                                          | 23524  | SRRM2    | asprprkklkSpfpvdrpds           |
| IP100782992 | 1467 | 1463 | unsp+cdc2->unsp                          |                                          | 23524  | SRRM2    | asprprkklkSpfpvdrpds           |
| IP100783004 | 943  | 941  | unsp+PKC->PKC                            | unsp+PKC->PKC                            | 5332   | PLCB4    | hlkkqklnSlkklhakehs            |
| IP100783017 | 412  | 420  | unsp+cdc2+CKII+PKA->unsp+cdc2+CKII       | unsp+cdc2+CKII+PKA->unsp+cdc2+CKII       | 9839   | ZEB2     | rnklengklpSlmsegtllki          |
| IP100783017 | 417  | 420  | unsp+cdc2+CKII+PKA->unsp+cdc2+CKII       | unsp+cdc2+CKII+PKA->unsp+cdc2+CKII       | 9839   | ZEB2     | rnklengklpSlmsegtllki          |
| IP100783017 | 417  | 422  |                                          | ->cdc2                                   | 9839   | ZEB2     | klengklpSlmsegtllki            |
| IP100783097 | 501  | 500  | ->CKI                                    | ->ATM+DNAPK                              | 2617   | GARS     | ktvnrvvqepSgaigkaykk           |
| IP100783271 | 155  | 152  | PKC->PKA                                 | PKC->PKA                                 | 10128  | LRPRC    | rteflrhawdTlqkqayvdy           |
| IP100783271 | 292  | 289  | unsp+PKC->                               |                                          | 10128  | LRPRC    | ekldidhlvleTlekveselh          |
| IP100783271 | 750  | 743  | ->cdc2                                   | ->cdc2                                   | 10128  | LRPRC    | lkeefdrldSavldtgkyvg           |
| IP100783271 | 750  | 748  | PKC->                                    | PKC->                                    | 10128  | LRPRC    | drldsdavidTgkyvgvlrvl          |
| IP100783271 | 750  | 751  | unsp->                                   | unsp->                                   | 10128  | LRPRC    | dsavldtgkyvgvlrvl              |
| IP100783302 | 126  | 123  | PKC+PKG+DNAPK->PKA+DNAPK                 | PKC+PKG+DNAPK->PKC+PKG+PKA+DNAPK         | 55037  | PTCD3    | genvakfiinSypkyfkdia           |
| IP100783559 | 454  | 461  | unsp+DNAPK->ATM+unsp+DNAPK               |                                          | 55770  | EXOC2    | fvekltklvqlpnfkwklv            |
| IP100783835 | 305  | 299  | ->PKA                                    | ->PKA                                    | 26046  | RNF160   | eldsleekfSlisgnkfkwky          |
| IP100783835 | 305  | 302  | PKC+DNAPK->DNAPK                         |                                          | 26046  | RNF160   | sleekfkslSgnkfkwkygk           |
| IP100783835 | 308  | 313  | unsp+PKC+PKA->unsp+PKC                   | unsp+PKC+PKA->unsp                       | 26046  | RNF160   | qnkvkygkSlvppqrsayfi           |
| IP100783874 | 179  | 175  | unsp+PKC->PKC                            | unsp+PKC->PKC                            | 84064  | NDH2     | eylqyattatTvyvqkpmf            |
| IP100784090 | 20   | 23   | unsp+cdc2+CKII->cdc2+CKII                | unsp+cdc2+CKII->cdc2+CKII                | 10694  | CCT8     | gmlekgakhsSgleeayrne           |
| IP100784090 | 318  | 317  |                                          | unsp+PKA+RSK->unsp+PKA+DNAPK+RSK         | 10694  | CCT8     | knymilvrnSkwdlrict             |
| IP100784090 | 400  | 398  | unsp+PKC->                               | unsp+PKC->                               | 10694  | CCT8     | ieravddgvnTfktvtrdrl           |
| IP100784090 | 466  | 465  |                                          | ->ATM                                    | 10694  | CCT8     | nsqvkanevisklyavhgegn          |
| IP100784090 | 466  | 468  | INSR->                                   |                                          | 10694  | CCT8     | vkanevisklyavhgegn             |
| IP100784154 | 87   | 83   |                                          | ->unsp                                   | 3329   | HSPD1    | vtkdgvvtakSlidldkykni          |
| IP100784154 | 125  | 122  | unsp->                                   |                                          | 3329   | HSPD1    | gtttatvlarSiakgfkis            |
| IP100784154 | 130  | 132  | unsp+PKA->PKC                            | unsp+PKA->                               | 3329   | HSPD1    | siakgfkisSkganveirr            |
| IP100784154 | 156  | 159  | PKC+PKA->PKA                             |                                          | 3329   | HSPD1    | davlaelkSkpvtptpeaia           |
| IP100784154 | 157  | 159  |                                          | PKC+PKA->PKA                             | 3329   | HSPD1    | davlaelkSkpvtptpeaia           |
| IP100784154 | 202  | 200  | unsp+PKC->                               | unsp+PKC->                               | 3329   | HSPD1    | mkkvgrkgvTlvdgkltnde           |
| IP100784154 | 233  | 227  | INSR->                                   | INSR->                                   | 3329   | HSPD1    | mkfdrgyspYfintskggkc           |
| IP100784154 | 233  | 231  | unsp+PKC->                               | unsp+PKC->                               | 3329   | HSPD1    | rgyspyfintSkkgkcefqda          |
| IP100784154 | 233  | 232  | PKC->CKI                                 | PKC->ATM+DNAPK                           | 3329   | HSPD1    | gyispyfintSkkgkcefqda          |
| IP100784154 | 236  | 232  | PKC->PKA                                 | PKC->                                    | 3329   | HSPD1    | gyispyfintSkkgkcefqda          |
| IP100784154 | 249  | 247  | unsp+PKC->PKC+RSK                        | unsp+PKC->PKC+RSK                        | 3329   | HSPD1    | cefqdayvllSekkissiqi           |
| IP100784154 | 250  | 252  | unsp+PKA->unsp                           | unsp+PKA->unsp                           | 3329   | HSPD1    | ayvllsekkisSsqisvpale          |
| IP100784154 | 352  | 351  |                                          | unsp+CKII->unsp+CKII+DNAPK               | 3329   | HSPD1    | dlqlygepvvTiddamllqk           |
| IP100784154 | 389  | 381  | CKII->cdc2+CKII                          |                                          | 3329   | HSPD1    | iqeieqldvTtseyekelkn           |
| IP100784154 | 389  | 385  | unsp->                                   | unsp->SRC                                | 3329   | HSPD1    | ieqlldvtteYekelknria           |
| IP100784154 | 396  | 398  | unsp->                                   |                                          | 3329   | HSPD1    | eklnieraklSdgavilkvvg          |
| IP100784154 | 462  | 453  | ->cdc2                                   |                                          | 3329   | HSPD1    | allrcipaldSltpanedqki          |
| IP100784154 | 469  | 471  |                                          |                                          | 3329   | HSPD1    | qkigieilkrTkipamtiak           |
| IP100784154 | 473  | 471  | PKC->PKA                                 | PKC->PKA                                 | 3329   | HSPD1    | qkigieilkrTkipamtiak           |
| IP100784154 | 523  | 522  | PKC->                                    | PKC->PKA                                 | 3329   | HSPD1    | nmvekigidTkvrvrtalda           |
| IP100784161 | 743  | 740  | unsp->unsp+EGFR                          | PKC->DNAPK                               | 6830   | SUPT6H   | knkliaakvYkveacrkly            |
| IP100784161 | 743  | 746  | PKC->unsp+cdc2                           | unsp->unsp+EGFR                          | 6830   | SUPT6H   | eaqeykacSklymrvlva             |
| IP100784161 | 1676 | 1668 | ->cdc2                                   | PKC->cdc2                                | 6830   | SUPT6H   | rrrqoqpknsShaidwqkma           |
| IP100784224 | 509  | 512  | unsp+PKC->                               | unsp+PKC->PKC                            | 51663  | ZFR      | infvggnklqSgtnkaedikg          |
| IP100784224 | 509  | 513  | PKC->                                    | PKC->                                    | 51663  | ZFR      | nfvngnklqSgtnkaedikg           |
| IP100784414 | 49   | 45   | SRC+unsp->                               | SRC+unsp->SRC+unsp+EGFR                  | 6774   | STAT3    | apwiesqdaYaasakeshatl          |
| IP100784414 | 49   | 48   |                                          | cdc2->ATM+DNAPK                          | 6774   | STAT3    | iesqdaayaaSkeshatvfh           |
| IP100784414 | 49   | 51   | PKA->                                    | PKA->                                    | 6774   | STAT3    | qdwayaaskeShatvfhnl            |
| IP100784473 | 3523 | 3522 |                                          | ->DNAPK                                  | 55187  | VPS13D   | lpppfndrnSkpvrvtqhg            |
| IP100784614 | 431  | 434  | unsp+PKC+PKA->unsp+PKA                   |                                          | 10801  | 9-Sep    | plidmfmrkSkvnyvnpvia           |
| IP100785015 | 1148 | 1147 |                                          | cdc2->ATM+cdc2                           | 254048 | UBN2     | lppnklaqSkltssnstgt            |
| IP100785015 | 1148 | 1153 | unsp+CKI->CKI                            | unsp+CKI->                               | 254048 | UBN2     | lppnkltssStgtvgknsi            |
| IP100785110 | 880  | 884  | unsp+p38MAPK->p38MAPK                    | unsp+p38MAPK->p38MAPK                    | 2186   | BTF      | rrhahkfdTpagefkwngs            |
| IP100785113 | 568  | 564  | PKC->                                    | PKC->                                    | 9208   | LRRF1P1  | ksdqgealdSsqkttknkkk           |
| IP100785113 | 568  | 565  | ATM+unsp+PKC+DNAPK->ATM+unsp+DNAPK       |                                          | 9208   | LRRF1P1  | sdqgealdSsqkttknkkk            |
| IP100788907 | 144  | 149  | unsp+PKC->                               | unsp+PKC->                               | 5827   | PXMP2    | glkfnkvhsSmtraiettdi           |
| IP100788907 | 191  | 188  | unsp->                                   |                                          | 5827   | PXMP2    | gapieppdpvShwkppeavvy          |
| IP100788925 | 44   | 42   | ATM+unsp+PKC+DNAPK->ATM+DNAPK            | ATM+unsp+PKC+DNAPK->ATM+DNAPK            | 587    | BCAT2    | fkaadqlqemTqkphkpppg           |
| IP100788925 | 47   | 42   | ATM+unsp+PKC+DNAPK->ATM+unsp+DNAPK       |                                          | 587    | BCAT2    | fkaadqlqemTqkphkpppg           |

Table S3

|             |      |      |                                         |                                                 |                     |        |           |                         |
|-------------|------|------|-----------------------------------------|-------------------------------------------------|---------------------|--------|-----------|-------------------------|
| IP100788925 | 322  | 320  | unsp->                                  | unsp->                                          |                     | 587    | BCAT2     | gefvrvertiTrmkalliralee |
| IP100788925 | 378  | 382  | unsp->                                  |                                                 |                     | 587    | BCAT2     | rfqkelkeiqYgirahewmfp   |
| IP100789041 | 238  | 237  | unsp+PKG->unsp+PKA                      | unsp+PKG->unsp+DNAPK                            |                     | 5411   | PNN       | akiikyirtKtphlfiygr     |
| IP100789101 | 37   | 41   | PKC->                                   | PKC->                                           |                     | 10728  | PTGES3    | vnvnfeksklTfsciggsdnf   |
| IP100789101 | 39   | 41   |                                         |                                                 |                     | 10728  | PTGES3    | vnvnfeksklTfsciggsdnf   |
| IP100789159 | 108  | 102  | unsp+PKG->unsp+PKG+PKA                  |                                                 |                     | 6147   | RPL23A    | lrpqgprkSaprmkldhny     |
| IP100789159 | 108  | 112  | unsp->                                  |                                                 |                     | 6147   | RPL23A    | saprmkldhYaiikflptte    |
| IP100789442 | 488  | 490  | INSR->                                  | INSR->                                          |                     | 7564   | ZNF16     | hqihtgkcpYrcscvgkfafs   |
| IP100789442 | 488  | 493  | PKC+cdc2+PKA->cdc2                      | PKC+cdc2+PKA->cdc2+PKA                          |                     | 7564   | ZNF16     | ihhtgkpyrcScvgkfafshss  |
| IP100789551 | 3    | 2    | cdc2->PKA+cdc2+DNAPK                    | cdc2->cdc2+DNAPK                                |                     | 9782   | MATR3     | -----mSKsfqsslsr        |
| IP100789551 | 3    | 9    | unsp+DNAPK->unsp+cdc2+DNAPK             | unsp+DNAPK->unsp+cdc2+DNAPK                     |                     | 9782   | MATR3     | --mksqfsgsSlrdsqghgr    |
| IP100789551 | 3    | 11   | unsp->unsp+cdc2                         |                                                 |                     | 9782   | MATR3     | mksfqsqslSrdsgqghrdl    |
| IP100789551 | 473  | 471  | unsp+ATM+PKC->ATM                       | unsp+ATM+PKC->ATM+DNAPK                         |                     | 9782   | MATR3     | vfgkpvrvhlSqykrnkipe    |
| IP100789551 | 571  | 569  | unsp+PKC->PKC                           | unsp+PKC->                                      |                     | 9782   | MATR3     | lfgrcvkvvlSekykvlrvl    |
| IP100789551 | 877  | 875  | unsp->                                  |                                                 |                     | 9782   | MATR3     | knthcsslphYqklkkfinkl   |
| IP100789551 | 879  | 875  | unsp->                                  |                                                 |                     | 9782   | MATR3     | knthcsslphYqklkkfinkl   |
| IP100789798 | 774  | 776  | PKA->                                   | PKA->                                           |                     | 10743  | RA11      | tkgleggkaSdgiskgdthe    |
| IP100789941 | 244  | 243  |                                         | ->ATM                                           |                     | 132660 | LIN54     | prtpstgprvTklifakpins   |
| IP100789941 | 249  | 253  | PKC->                                   |                                                 |                     | 132660 | LIN54     | tklifakpinSkavtgqttqv   |
| IP100789941 | 357  | 356  | unsp->                                  | unsp->ATM+unsp+DNAPK                            |                     | 132660 | LIN54     | pnvqqiqvpgSkfhyrvlta    |
| IP100789941 | 357  | 360  | unsp->                                  |                                                 |                     | 132660 | LIN54     | qivqpgskfhyrvlvtatas    |
| IP100790342 | 211  | 214  | PKC->                                   | PKC->                                           |                     | 6128   | RPL6      | ismvkipkhlTdayfkklkr    |
| IP100790342 | 219  | 214  | PKC->                                   |                                                 |                     | 6128   | RPL6      | ismvkipkhlTdayfkklkr    |
| IP100790342 | 240  | 241  | INSR+unsp->unsp                         |                                                 |                     | 6128   | RPL6      | geifdtekeYelteqrkidd    |
| IP100790503 | 1268 | 1271 | unsp+PKC->PKC                           | unsp+PKC->PKC                                   |                     | 4628   | MYH10     | kvklqqvkaeSahrkklddaq   |
| IP100790503 | 1366 | 1368 | unsp+PKA+CKII->CKII                     | unsp+PKA+CKII->unsp+CKII                        |                     | 4628   | MYH10     | rirgleeknSlqeqqeeee     |
| IP100791574 | 29   | 33   | unsp+PKC->                              |                                                 |                     | 7871   | SLMAP     | yldepikigrSwarcpaqnn    |
| IP100792352 | 57   | 62   | PKC+PKA->                               | PKC+PKA->                                       |                     | 221547 | RANP1     | tgfekkyvaTlgvevhlplv    |
| IP100792352 | 58   | 62   | PKC+PKA->                               | PKC+PKA->PKC                                    |                     | 221547 | RANP1     | tgfekkyvaTlgvevhlplv    |
| IP100792352 | 119  | 117  | unsp+PKC->                              | unsp+PKC->                                      |                     | 221547 | RANP1     | iimfdvtsrvTyknvpnwrlv   |
| IP100792352 | 179  | 170  | ->cdc2                                  |                                                 |                     | 221547 | RANP1     | rkkllkyvylSakynrfekp    |
| IP100792352 | 179  | 175  |                                         | ->EGFR                                          |                     | 221547 | RANP1     | tyydsiaksnYfnekpfwila   |
| IP100792743 | 401  | 392  | cdc2->                                  | cdc2->                                          |                     | 79811  | SLTM      | stkniwvsglSsntkaadlkn   |
| IP100792743 | 1024 | 1019 | unsp->unsp+PKA                          | unsp->unsp+PKA                                  | PhosphoSite         | 79811  | SLTM      | qisgnsmprgSgsgfkpgkgg   |
| IP100792743 | 1024 | 1021 | PKC->                                   | PKC->                                           | PhosphoSite         | 79811  | SLTM      | sgnsmprgsgSgfkpgkggpp   |
| IP100792984 | 45   | 41   |                                         | CKII->PKG+CKII                                  |                     | 10776  | ARPP19    | nslemedkvTspekaeakl     |
| IP100792984 | 45   | 42   | unsp+CKI+p38MAPK->unsp+CKI+CKII+p38MAPK | unsp+CKI+p38MAPK->unsp+CKI+CKII+p38MAPK         |                     | 10776  | ARPP19    | sllemedkvTspekaeaklk    |
| IP100792984 | 50   | 42   | unsp+CKI+p38MAPK->unsp+CKI+cdc2+p38MAPK |                                                 |                     | 10776  | ARPP19    | stlemedkvTspekaeaklk    |
| IP100792984 | 128  | 123  | unsp+PKG+PKA+RSK->unsp+PKG+PKA          | unsp+PKG+PKA+RSK->unsp+PKG+PKA                  |                     | 10776  | ARPP19    | tpqdlqrkpsSVasaklag--   |
| IP100792984 | 128  | 127  |                                         | ->ATM+DNAPK                                     |                     | 10776  | ARPP19    | lpgkrpsvlsSakag--       |
| IP100793199 | 215  | 218  | ATM+unsp+DNAPK->ATM+unsp+cdc2+DNAPK     | ATM+unsp+DNAPK->ATM+unsp+PKC+cdc2+DNAPK         |                     | 307    | ANXA4     | lhvfdykrSgdkdiegskis    |
| IP100793199 | 227  | 218  | ATM+unsp+DNAPK->ATM+unsp+cdc2+DNAPK     |                                                 |                     | 307    | ANXA4     | lhvfdykrSgdkdiegskis    |
| IP100793199 | 227  | 225  | unsp+PKC->                              | unsp+PKC->                                      |                     | 307    | ANXA4     | krisqkdieqSiksetsqsf    |
| IP100793199 | 227  | 230  | PKC->cdc2                               | PKC->PKC+cdc2                                   |                     | 307    | ANXA4     | kdiesikseTsgsfedalla    |
| IP100793199 | 227  | 233  | unsp->unsp+cdc2                         | unsp->unsp+cdc2                                 |                     | 307    | ANXA4     | eqsiksetsqSfedallaivk   |
| IP100793199 | 295  | 298  | unsp->                                  | unsp->                                          |                     | 307    | ANXA4     | hfkrylgskYsfikgdtsgd    |
| IP100793199 | 295  | 299  | unsp+PKC+cdc2->CKI+cdc2                 | unsp+PKC+cdc2->unsp+CKI+cdc2                    |                     | 307    | ANXA4     | fkrlygkslySfikgdtsgdy   |
| IP100793199 | 302  | 296  | ->PKA                                   | ->PKA                                           |                     | 307    | ANXA4     | rahkrylgsYsfykfgdtgs    |
| IP100793199 | 302  | 298  | unsp->                                  | unsp->                                          |                     | 307    | ANXA4     | hfkrylgsYsfikgdtsgd     |
| IP100793199 | 302  | 299  | unsp+PKC+cdc2->cdc2                     | unsp+PKC+cdc2->unsp+CKI+cdc2                    |                     | 307    | ANXA4     | fkrlygkslySfikgdtsgdy   |
| IP100793199 | 302  | 305  | unsp->                                  | unsp+CKII->CKII                                 |                     | 307    | ANXA4     | kslysfikgdtsgdyrvllv    |
| IP100793199 | 302  | 306  | unsp+CKII->CKII                         | unsp+CKII->unsp+cdc2+CKII                       |                     | 307    | ANXA4     | slsyfiktgdSgdyrvllv     |
| IP100793199 | 302  | 309  | INSR->                                  | INSR->                                          |                     | 307    | ANXA4     | sfikgdtsgdyrvllvlgcg    |
| IP100793201 | 57   | 54   | PKC+cdc2->PKA+cdc2                      | PKC+cdc2->cdc2                                  |                     | 9255   | AIMP1     | qieyfqkvSllkekailqa     |
| IP100793375 | 173  | 169  |                                         | ->PKG                                           |                     | 7511   | XPNPEP1   | rvgvdlpiiTdywkkmakvl    |
| IP100793375 | 174  | 181  | ->PKA                                   | ->PKA                                           |                     | 7511   | XPNPEP1   | ywkkmakvlrvSaghlilpvke  |
| IP100793375 | 347  | 355  | ->INSR                                  |                                                 |                     | 7511   | XPNPEP1   | ipkdhrcmcpTtpciakavk    |
| IP100793696 | 77   | 86   | unsp->unsp+PKA                          |                                                 |                     | 6152   | RPL24     | vkrfdgkqSsladimaknq     |
| IP100794402 | 186  | 189  | INSR+unsp->INSR                         |                                                 |                     | 396    | ARHGDI1   | rkgykldkdtvmvsgypgae    |
| IP100794402 | 223  | 219  | unsp+PKC+DNAPK->unsp+PKA+DNAPK          | unsp+PKC+DNAPK->unsp+PKC+PKA+DNAPK              |                     | 396    | ARHGDI1   | eaqkplmargSsyskrftdd    |
| IP100794402 | 223  | 221  | unsp+PKC->                              | unsp+PKC->                                      |                     | 396    | ARHGDI1   | pkgmargysSiksrftddk     |
| IP100794402 | 223  | 224  | unsp->                                  | unsp->                                          |                     | 396    | ARHGDI1   | lmargysysikSrtfddktdh   |
| IP100794402 | 223  | 227  | unsp+PKC+CKII->unsp+CKII                |                                                 |                     | 396    | ARHGDI1   | rgsysiksrftddktdhslw    |
| IP100794461 | 6    | 5    |                                         | ->DNAPK                                         |                     | 8341   | HIST1H2BN | -----mpepSKsapapkkgs    |
| IP100794461 | 6    | 7    | unsp->                                  | unsp->                                          |                     | 8341   | HIST1H2BN | -----mpepskSapapkkgs    |
| IP100794461 | 12   | 7    | unsp->                                  | unsp->                                          |                     | 8341   | HIST1H2BN | -----mpepskSapapkkgs    |
| IP100794461 | 12   | 15   | unsp+PKC->PKC                           | unsp+PKC->PKC                                   | Uniprot             | 8341   | HIST1H2BN | sksapapkkgsKavtkaaqk    |
| IP100794461 | 13   | 15   | unsp+PKC->PKC                           |                                                 | Uniprot             | 8341   | HIST1H2BN | sksapapkkgsKavtkaaqk    |
| IP100794461 | 16   | 15   | unsp+PKC->unsp+PKC+PKA                  | unsp+PKC->ATM+unsp+PKC+DNAPK                    | Uniprot             | 8341   | HIST1H2BN | sksapapkkgsKavtkaaqk    |
| IP100794461 | 17   | 15   | unsp+PKC->PKC+PKA                       | unsp+PKC->PKC+PKA                               | Uniprot             | 8341   | HIST1H2BN | sksapapkkgsKavtkaaqk    |
| IP100794461 | 21   | 15   | unsp+PKC->unsp+PKC+PKA                  | unsp+PKC->unsp+PKC+PKA                          | Uniprot             | 8341   | HIST1H2BN | sksapapkkgsKavtkaaqk    |
| IP100794461 | 21   | 20   |                                         | PKC->PKC+DNAPK                                  |                     | 8341   | HIST1H2BN | apkkgsKavtkaaqk         |
| IP100794461 | 109  | 113  | unsp->                                  |                                                 |                     | 8341   | HIST1H2BN | lpgelakhavSegtkaavtkyt  |
| IP100794461 | 121  | 120  |                                         | ->ATM+DNAPK                                     |                     | 8341   | HIST1H2BN | havegskavTkytsskrrkr    |
| IP100795015 | 943  | 940  | unsp+PKC+DNAPK->DNAPK                   |                                                 |                     | 8341   | HIST1H2BN | havegskavTkytsskrrkr    |
| IP100795015 | 943  | 941  | INSR->                                  | INSR->                                          |                     | 8341   | HIST1H2BN | havegskavTkytsskrrkr    |
| IP100795015 | 945  | 940  | unsp+PKC+DNAPK->PKC+DNAPK               | unsp+PKC+DNAPK->PKC+DNAPK                       |                     | 8341   | HIST1H2BN | havegskavTkytsskrrkr    |
| IP100795015 | 945  | 953  | ->cdc2                                  |                                                 |                     | 8341   | HIST1H2BN | havegskavTkytsskrrkr    |
| IP100795043 | 354  | 356  | PKG->                                   | PKG->                                           |                     | 8341   | HIST1H2BN | havegskavTkytsskrrkr    |
| IP100795043 | 363  | 367  | unsp+PKG+PKA+RSK->unsp+PKG+PKA          |                                                 |                     | 8341   | HIST1H2BN | havegskavTkytsskrrkr    |
| IP100795043 | 363  | 368  |                                         | unsp+PKC+PKA->unsp+PKA                          | PhosphoSite         | 8341   | HIST1H2BN | havegskavTkytsskrrkr    |
| IP100795292 | 127  | 122  | PKC->                                   | PKC->                                           |                     | 8341   | HIST1H2BN | havegskavTkytsskrrkr    |
| IP100795292 | 164  | 159  | unsp+PKA+RSK->unsp+PKA                  | unsp+PKA+RSK->unsp+PKA                          | PHOSphoELM          | 8341   | HIST1H2BN | havegskavTkytsskrrkr    |
| IP100795292 | 164  | 167  |                                         | unsp+PKC+PKA->unsp+PKA                          |                     | 8341   | HIST1H2BN | havegskavTkytsskrrkr    |
| IP100795292 | 215  | 214  | unsp+CKI->unsp+DNAPK                    |                                                 |                     | 8341   | HIST1H2BN | havegskavTkytsskrrkr    |
| IP100795292 | 239  | 235  | PKC+cdc2->PKA                           | PKC+cdc2->                                      |                     | 8341   | HIST1H2BN | havegskavTkytsskrrkr    |
| IP100795292 | 239  | 237  | unsp+PKC+cdc2->unsp+cdc2                | unsp+PKC+cdc2->unsp+cdc2                        |                     | 8341   | HIST1H2BN | havegskavTkytsskrrkr    |
| IP100795292 | 243  | 235  |                                         | PKC+cdc2->PKC                                   |                     | 8341   | HIST1H2BN | havegskavTkytsskrrkr    |
| IP100795922 | 138  | 139  | unsp+EGFR->unsp                         |                                                 |                     | 8341   | HIST1H2BN | havegskavTkytsskrrkr    |
| IP100796333 | 96   | 93   | PKC->                                   |                                                 |                     | 8341   | HIST1H2BN | havegskavTkytsskrrkr    |
| IP100796333 | 96   | 100  | PKA+RSK->PKA                            |                                                 |                     | 8341   | HIST1H2BN | havegskavTkytsskrrkr    |
| IP100796513 | 294  | 285  |                                         | unsp+PKC+PKG+cdc2+PKA+RSK->unsp+PKC+PKG+PKA+RSK |                     | 8341   | HIST1H2BN | havegskavTkytsskrrkr    |
| IP100796864 | 232  | 239  | ->PKA                                   |                                                 |                     | 8341   | HIST1H2BN | havegskavTkytsskrrkr    |
| IP100796934 | 33   | 29   |                                         | unsp->unsp+EGFR                                 |                     | 8341   | HIST1H2BN | havegskavTkytsskrrkr    |
| IP100796934 | 33   | 31   | unsp->unsp+cdc2+PKA                     | unsp->unsp+cdc2+PKA                             |                     | 8341   | HIST1H2BN | havegskavTkytsskrrkr    |
| IP100797279 | 412  | 406  | ATM+unsp+DNAPK->unsp+DNAPK              |                                                 |                     | 8341   | HIST1H2BN | havegskavTkytsskrrkr    |
| IP100797279 | 559  | 558  | unsp+PKA->PKA                           | unsp+PKA->unsp+PKA+DNAPK                        |                     | 8341   | HIST1H2BN | havegskavTkytsskrrkr    |
| IP100797574 | 473  | 478  | PKC->                                   | PKC->                                           |                     | 8341   | HIST1H2BN | havegskavTkytsskrrkr    |
| IP100797720 | 208  | 210  | unsp+PKC+cdc2->PKC+cdc2                 |                                                 |                     | 8341   | HIST1H2BN | havegskavTkytsskrrkr    |
| IP100797720 | 211  | 210  | unsp+PKC+cdc2->PKC+cdc2                 | unsp+PKC+cdc2->PKC+cdc2                         |                     | 8341   | HIST1H2BN | havegskavTkytsskrrkr    |
| IP100797720 | 213  | 210  | unsp+PKC+cdc2->PKC+cdc2                 | unsp+PKC+cdc2->PKC+cdc2                         |                     | 8341   | HIST1H2BN | havegskavTkytsskrrkr    |
| IP100797720 | 213  | 217  | PKC+PKG+PKA->                           | PKC+PKG+PKA->                                   |                     | 8341   | HIST1H2BN | havegskavTkytsskrrkr    |
| IP100797945 | 399  | 393  | ATM+unsp+DNAPK->unsp+DNAPK              |                                                 |                     | 8341   | HIST1H2BN | havegskavTkytsskrrkr    |
| IP100797945 | 546  | 545  | unsp+PKA->PKA                           | unsp+PKA->unsp+PKA+DNAPK                        |                     | 8341   | HIST1H2BN | havegskavTkytsskrrkr    |
| IP100798011 | 11   | 12   |                                         | CKII->unsp+CKII                                 |                     | 8341   | HIST1H2BN | havegskavTkytsskrrkr    |
| IP100798155 | 6    | 7    |                                         | PKC->unsp+PKC                                   |                     | 8341   | HIST1H2BN | havegskavTkytsskrrkr    |
| IP100798155 | 6    | 12   | ->PKA                                   |                                                 |                     | 8341   | HIST1H2BN | havegskavTkytsskrrkr    |
| IP100798155 | 530  | 533  | unsp->                                  | unsp->                                          |                     | 8341   | HIST1H2BN | havegskavTkytsskrrkr    |
| IP100807573 | 530  | 536  | unsp->unsp+cdc2                         |                                                 |                     | 8341   | HIST1H2BN | havegskavTkytsskrrkr    |
| IP100807625 | 66   | 65   | SRC+unsp->SRC+unsp+EGFR                 | SRC+unsp->SRC+unsp+EGFR                         |                     | 8341   | HIST1H2BN | havegskavTkytsskrrkr    |
| IP100807625 | 66   | 68   | unsp+cdc2->cdc2                         |                                                 |                     | 8341   | HIST1H2BN | havegskavTkytsskrrkr    |
| IP100807625 | 66   | 69   | unsp+PKC->unsp+PKC+cdc2                 |                                                 |                     | 8341   | HIST1H2BN | havegskavTkytsskrrkr    |
| IP100807625 | 110  | 115  | unsp+PKA->unsp                          | unsp+PKA->unsp                                  |                     | 8341   | HIST1H2BN | havegskavTkytsskrrkr    |
| IP100807625 | 132  | 136  | unsp+PKC->PKC                           | unsp+PKA->unsp                                  |                     | 8341   | HIST1H2BN | havegskavTkytsskrrkr    |
| IP100807625 | 132  | 137  | unsp+PKC->unsp+PKC+cdc2                 |                                                 |                     | 8341   | HIST1H2BN | havegskavTkytsskrrkr    |
| IP100815642 | 30   | 26   | PKC->                                   | PKC->                                           |                     | 8341   | HIST1H2BN | havegskavTkytsskrrkr    |
| IP100815642 | 30   | 28   | unsp+PKC->CKII                          | unsp+PKC->unsp+PKC+cdc2                         |                     | 8341   | HIST1H2BN | havegskavTkytsskrrkr    |
| IP100815642 | 52   | 49   | PKC+DNAPK->DNAPK                        | PKC->                                           |                     | 8341   | HIST1H2BN | havegskavTkytsskrrkr    |
| IP100815642 | 58   | 57   |                                         | unsp->ATM+unsp+DNAPK                            |                     | 8341   | HIST1H2BN | havegskavTkytsskrrkr    |
| IP100815642 | 58   | 60   |                                         | ->unsp                                          |                     | 8341   | HIST1H2BN | havegskavTkytsskrrkr    |
| IP100815707 | 1685 | 1679 | unsp+cdk5->unsp                         | unsp+cdk5->unsp                                 | Uniprot PhosphoSite | 404734 | ANKHD1-E1 | sspnklnltSpkrqgkreeg    |
| IP100815713 | 155  | 153  | unsp+PKC->                              | unsp+PKC->                                      | Uniprot PhosphoSite | 6949   | TCOF1     | atgkvanlISgksprksaep    |
| IP100815713 | 155  | 156  | unsp+cdk5+p38MAPK->unsp+p38MAPK         |                                                 | Uniprot PhosphoSite | 6949   | TCOF1     | atgkvanlISgksprksaep    |
| IP100815713 | 155  | 160  | unsp+PKG+PKA->unsp+PKG                  | unsp+PKG+PKA->unsp+PKG                          | Uniprot             | 6949   | TCOF1     |                         |

Table S3

|             |      |      |                                          |                                           |                                |        |          |                        |
|-------------|------|------|------------------------------------------|-------------------------------------------|--------------------------------|--------|----------|------------------------|
| IP100815713 | 1451 | 1447 | ATM+CKI+PKC+DNAPK->unsp+ATM+CKI+DNAPK    | ATM+CKI+PKC+DNAPK->unsp+ATM+CKI+PKC+DNAPK | Uniprot PhosphoSite            | 6949   | TCOF1    | kekkgksglGgqakdepeee   |
| IP100816288 | 32   | 31   |                                          | unsp->ATM+unsp+DNAPK                      |                                | 7115   | TMSL1    | tetqeknlpSktieeqkqa    |
| IP100816288 | 32   | 34   |                                          | ->unsp                                    |                                | 7115   | TMSL1    | qeknlpskteTieeqkqages  |
| IP100827535 | 15   | 10   | unsp+PKC+CKI->unsp+CKI                   | unsp+PKC+CKI->                            | Uniprot                        | 150928 | PTMAP5   | -msdaavdtsSeittkdlkek  |
| IP100827535 | 15   | 13   | unsp+CKI+PKC->CKI+CKII                   | unsp+CKI+PKC->CKI                         | Uniprot PHOsphoELM             | 150928 | PTMAP5   | daavdtsSeittkdlkekkev  |
| IP100827535 | 15   | 14   |                                          | unsp+CKII->unsp+CKII+DNAPK                | Uniprot PHOsphoELM             | 150928 | PTMAP5   | avadtSeittkdlkekkev    |
| IP100827535 | 18   | 13   | unsp+CKI+PKC->unsp+CKI                   | unsp+CKI+PKC->unsp                        | Uniprot PHOsphoELM             | 150928 | PTMAP5   | daavdtSeittkdlkekkev   |
| IP100827535 | 18   | 14   |                                          | unsp+CKII->CKII                           | Uniprot PHOsphoELM             | 150928 | PTMAP5   | aaavdtSeittkdlkekkev   |
| IP100827535 | 103  | 102  | unsp+PKC+CKII->unsp+PKC                  |                                           | PhosphoSite                    | 150928 | PTMAP5   | aedddeeddvtKkqktdeedd  |
| IP100827535 | 104  | 102  | unsp+PKC+CKII->PKC+CKII                  | unsp+PKC+CKII->PKC+CKII                   | PhosphoSite                    | 150928 | PTMAP5   | aedddeeddvtKkqktdeedd  |
| IP100827930 | 421  | 429  | unsp+PKC->unsp+PKC+cdc2                  |                                           | PhosphoSite                    | 125488 | TTC39C   | krknneiqfSvkkærffrkq   |
| IP100828125 | 507  | 505  |                                          | unsp->unsp+cdk5                           |                                | 55627  | SMPD4    | lnralrtldvSpkhalmvfrv  |
| IP100829826 | 15   | 10   | unsp+CKI+cdc2+CKII->unsp+cdc2+CKII       | unsp+CKI+cdc2+CKII->unsp+cdc2+CKII        |                                | 5469   | MED1     | -mkaagteeSeSeksismssll |
| IP100829826 | 15   | 14   |                                          | unsp+PKA->ATM+unsp                        |                                | 5469   | MED1     | qgseteeSeSeksismssll   |
| IP100829826 | 15   | 17   | PKA->                                    | PKA->                                     |                                | 5469   | MED1     | teeseksismSallerhkf    |
| IP100829826 | 1076 | 1071 | PKC+cdc2->cdc2                           |                                           |                                | 5469   | MED1     | pkitqitpgkTvmvgkpsShs  |
| IP100829826 | 1076 | 1078 | unsp+PKG->                               | unsp+PKG->unsp                            |                                | 5469   | MED1     | pkgtvmvgkpSshsqtstsgs  |
| IP100829826 | 1076 | 1079 | unsp+PKC->                               | unsp+PKC->PKC                             |                                | 5469   | MED1     | kgvtvmvgkpsShsqtstsgs  |
| IP100829826 | 1076 | 1081 | ATM+unsp+DNAPK->ATM+unsp+cdc2+DNAPK      | ATM+unsp+DNAPK->ATM+unsp+cdc2+DNAPK       |                                | 5469   | MED1     | tvmvgkpsShsqtstsgsvss  |
| IP100829826 | 1177 | 1179 | unsp+PKG->                               | unsp+PKG->                                |                                | 5469   | MED1     | stkmkpggkpSslmppsiskp  |
| IP100829826 | 1311 | 1316 | unsp+PKC->unsp                           | unsp+PKC->unsp                            |                                | 5469   | MED1     | vidiklghvvtTsgpggedldp |
| IP100829826 | 1354 | 1358 | unsp+RSK->unsp                           | unsp+RSK->unsp                            |                                | 5469   | MED1     | ggfegfkgkneSdskdsksvts |
| IP100829826 | 1529 | 1527 | unsp+PKC+RSK->unsp+PKA+RSK               | unsp+PKC+RSK->unsp+RSK                    |                                | 5469   | MED1     | drldkdrkSshskpsesvsk   |
| IP100829826 | 1529 | 1527 | unsp+PKC+cdc2->unsp+cdc2                 | unsp+PKC+cdc2->unsp+cdc2                  |                                | 5469   | MED1     | dkdrdkkshSikspssvsk    |
| IP100829826 | 1529 | 1532 | unsp+PKC->unsp+PKC+GSK3                  |                                           |                                | 5469   | MED1     | kkkshskpsSvskspssdq    |
| IP100843975 | 139  | 144  | unsp+PKA->                               | unsp+PKA->                                |                                | 7430   | EZR      | fdgynkvhKsgylslerip    |
| IP100844000 | 571  | 576  | PKA->CKI                                 |                                           |                                | 23376  | KIAA0776 | qaaltkhllKvScdtitlilf  |
| IP100844214 | 91   | 93   | unsp+PKC+PKA->unsp+PKC                   | unsp+PKC+PKA->unsp                        |                                | 56259  | CTNNB1   | kmlltfekrSynkqelnkf    |
| IP100844214 | 91   | 94   | INSR+unsp->                              | INSR+unsp->                               |                                | 56259  | CTNNB1   | kmlltfekrSynkqelnkf    |
| IP100844264 | 127  | 125  | unsp+PKC+PKG->                           | unsp+PKC+PKG->                            |                                | 7812   | CSD1     | vefvevssdrTgkpiakvlkv  |
| IP100844508 | 579  | 573  |                                          | unsp+PKC->PKC                             |                                | 57530  | CGN      | etseteeqhwqfSkmlknkdlr |
| IP100844508 | 579  | 585  | unsp->unsp+PKA                           | ->cdc2                                    |                                | 57530  | CGN      | fqknkdnraTqkqellarme   |
| IP100844578 | 1024 | 1025 |                                          | ->cdc2                                    |                                | 1660   | DHX9     | tegrnaliKScvncpfssad   |
| IP100844578 | 1024 | 1026 | cdc2->PKC+cdc2                           |                                           |                                | 1660   | DHX9     | egmalihKScvncpfssad    |
| IP100845227 | 185  | 181  | PKC->                                    | PKC->                                     |                                | 128061 | C1orf131 | arievhvrfTgygkgkerl    |
| IP100845355 | 967  | 962  | unsp+PKC+CKII->CKII                      | unsp+PKC+CKII->CKII                       |                                | 546    | ATRX     | ktckkvqdgISdiaefllkd   |
| IP100845355 | 1930 | 1921 | unsp+DNAPK->unsp+cdc2+DNAPK              |                                           |                                | 546    | ATRX     | iasdsdetsmSlssddytkkk  |
| IP100845355 | 1930 | 1924 |                                          | unsp+PKC+CKII->unsp+PKC                   |                                | 546    | ATRX     | etsdmslSsSddytkkkkkg   |
| IP100845355 | 1930 | 1927 |                                          | INSR+unsp->INSR+unsp+EGFR                 | PhosphoSite                    | 546    | ATRX     | etsdmslSsddytkkkkkgkkg |
| IP100845355 | 1930 | 1928 | unsp+PKC->PKC                            | unsp+PKC->PKC                             | PhosphoSite                    | 546    | ATRX     | etsdmslSsddytkkkkkgkkg |
| IP100845355 | 1936 | 1941 | unsp+cdc2+PKA->unsp+cdc2                 | unsp+cdc2+PKA->unsp+cdc2                  |                                | 546    | ATRX     | kgkkgkkgkSsssgsgsdnd   |
| IP100845355 | 1936 | 1943 | unsp+unsp+cdc2                           |                                           |                                | 546    | ATRX     | kgkkgkkgkSsssgsgsdndve |
| IP100845355 | 1939 | 1941 | unsp+cdc2+PKA->unsp+cdc2                 | unsp+cdc2+PKA->unsp+cdc2                  |                                | 546    | ATRX     | kgkkgkkgkSsssgsgsdnd   |
| IP100845479 | 471  | 476  | unsp->cdc2                               | unsp->cdc2                                |                                | 10659  | CUGBP2   | kvfidqtnlSkcfqfvsydn   |
| IP100847436 | 196  | 190  | unsp->unsp+PKA                           |                                           |                                | 10765  | KDM5B    | npynlftsgdSlrcqkpnlt   |
| IP100848226 | 130  | 128  | unsp->PKA                                |                                           |                                | 10399  | GNB2L1   | rqvsgsrdkTlklwntlgvc   |
| IP100848226 | 130  | 134  | PKC+DNAPK->DNAPK                         | PKC+DNAPK->DNAPK                          |                                | 10399  | GNB2L1   | srdrtklwnTlgvckytvad   |
| IP100852603 | 1053 | 1047 | ->PKA                                    | ->PKA                                     |                                | 164045 | HFM1     | dnqvvyllhTgSvllkagsv   |
| IP100852603 | 1059 | 1056 | PKC+cdc2->cdc2                           |                                           |                                | 164045 | HFM1     | itdvllkagSvokkikavkra  |
| IP100852685 | 1057 | 1048 |                                          | cdc2->->unsp                              |                                | 1729   | DIAPH1   | pdelahevkaSvrsenakgn   |
| IP100852685 | 1103 | 1101 |                                          | unsp->cdc2                                |                                | 1729   | DIAPH1   | tsfykdageqYnklrmhmsnm  |
| IP100853009 | 462  | 467  | unsp->cdc2                               | unsp->cdc2                                |                                | 10658  | CUGBP1   | kvfidqtnlSkcfqfvsydn   |
| IP100853077 | 738  | 736  | unsp+PKC+PKG+PKA->PKG+PKA                | unsp+PKC+PKG+PKA->PKG+PKA                 |                                | 51105  | PHF20L1  | icrdpggrwSakryrdkewl   |
| IP100853077 | 738  | 741  | INSR->                                   | INSR->                                    |                                | 51105  | PHF20L1  | pgqrwsakryYdkewlningrm |
| IP100853077 | 910  | 908  | unsp->CKII                               | unsp->CKII                                |                                | 51105  | PHF20L1  | hmrsksnlqySakehgmpekn  |
| IP100853240 | 266  | 265  | PKC->                                    | PKC->DNAPK                                |                                | 83860  | TAf3     | sqmptakpleTksftptkttk  |
| IP100853240 | 266  | 269  |                                          | CKI->                                     |                                | 83860  | TAf3     | takpletktTptktktsssp   |
| IP100853240 | 776  | 775  |                                          | ->ATM                                     |                                | 83860  | TAf3     | vsgpgdkvlySkvvpapeakp  |
| IP100853400 | 92   | 85   | INSR->                                   | INSR->                                    |                                | 23307  | FKBP15   | havatahayYtnqgyvkaqg   |
| IP100853400 | 92   | 86   | ->PKA                                    |                                           |                                | 23307  | FKBP15   | vatavhayrYtnqgyvkaqgf  |
| IP100854642 | 974  | 977  | unsp->                                   | unsp->                                    |                                | 23244  | PD5A     | harqlclnKsIrreykqnp    |
| IP100854642 | 1146 | 1149 | unsp->                                   | unsp->                                    |                                | 23244  | PD5A     | gvlgavmkplSatgrkpyvrs  |
| IP100854642 | 1211 | 1208 | cdk5->                                   | cdk5->                                    | Uniprot PHOsphoELM PhosphoSite | 23244  | PD5A     | eenpvriisvTpvkndpvkn   |
| IP100855767 | 422  | 414  |                                          | cdc2->                                    |                                | 5910   | RAP1GDS1 | vteavilfkfSempvpqfkl   |
| IP100855767 | 422  | 426  | PKC->                                    | PKC->ATM+PKC+DNAPK                        |                                | 5910   | RAP1GDS1 | mpvpqfklTlrmldaqae     |
| IP100855856 | 251  | 250  | unsp+PKC->                               |                                           |                                | 8539   | AP15     | qctrqavplSkvnmfstrvrt  |
| IP100855856 | 251  | 255  | unsp+PKC->                               |                                           |                                | 8539   | AP15     | avplfknvHstrfvtfcqg    |
| IP100855924 | 68   | 65   | PKC->PKC+CKII                            | PKC->PKC+CKII                             |                                | 143244 | E1FSA11  | kvhlvgldITfqlkyedlcp   |
| IP100855980 | 91   | 94   | EGFR->                                   | EGFR->                                    |                                | 4833   | NME4     | hyqdlrrkPfPalirmsssg   |
| IP100855998 | 1673 | 1668 | ATM+CKI+DNAPK->ATM+DNAPK                 | ATM+CKI+DNAPK->ATM+DNAPK                  |                                | 1063   | CENPF    | slekleekmeSgqimknkeiq  |
| IP100855998 | 2757 | 2756 | unsp+PKC+cdc2+PKA->cdc2+PKA              | unsp+PKC+cdc2+PKA->cdc2+PKA               |                                | 1063   | CENPF    | lqlleekSsdqldkeltle    |
| IP100856049 | 70   | 68   | unsp+PKC->                               | unsp+PKC->                                |                                | 200916 | RPL22L1  | erfknkitvVsekgfskrykl  |
| IP100856115 | 90   | 81   |                                          | ATM+unsp+cdc2+DNAPK->ATM+unsp+DNAPK       |                                | 29803  | REPIN1   | laqrlpsgSaesptqlgke    |
| IP100856115 | 90   | 81   | unsp+PKC->unsp                           | unsp+PKC->unsp                            |                                | 29803  | REPIN1   | lsgpsaesqplTgkesgrlq   |
| IP100856115 | 90   | 92   | PKA->                                    | PKA->                                     |                                | 29803  | REPIN1   | qesptqlgkeYlSkvntsfgrt |
| IP100856115 | 333  | 331  | unsp+PKC+PKG+PKA->cdc2+PKA               | unsp+PKC+PKG+PKA->PKA                     |                                | 29803  | REPIN1   | hqqeqepkrTtnkgyllsthr  |
| IP100856115 | 333  | 337  | unsp+PKC->                               | unsp+PKC->PKC                             |                                | 29803  | REPIN1   | gkrftrnqYlTshrihtgk    |
| IP100869087 | 21   | 19   | PKC->                                    | PKC->                                     |                                | 220832 | FABP5L3  | ciitcdsknlTikttesttktt |
| IP100869087 | 21   | 24   | unsp+PKC->PKC                            | unsp+PKC->PKC                             |                                | 220832 | FABP5L3  | dsknltkteStlktqfsgt    |
| IP100869087 | 21   | 25   | unsp+PKC->unsp+CKI                       | unsp+PKC->unsp+CKI+PKC                    |                                | 220832 | FABP5L3  | sknlitktesTlktqfsgt    |
| IP100871134 | 28   | 27   | ->PKA                                    |                                           |                                |        |          | qcekvtvdvkSkfceedvssd  |
| IP100871134 | 28   | 36   | CKII->cdc2+CKII                          |                                           |                                |        |          | kskfceedvSdlrkevenhy   |
| IP100871535 | 1519 | 1517 |                                          | ->unsp                                    |                                | 6709   | SPTAN1   | faddlgaagYhagdisssrm   |
| IP100871535 | 1519 | 1523 | unsp+PKC->unsp                           |                                           |                                | 6709   | SPTAN1   | aaghyakgdISrmnevldrw   |
| IP100871535 | 1519 | 1524 | unsp+PKC->PKC                            | unsp+PKC->                                |                                | 6709   | SPTAN1   | aghyakgdISrmnevldrw    |
| IP100871535 | 2057 | 2056 | ->PKA                                    | ->DNAPK                                   |                                | 6709   | SPTAN1   | dqlaakhvqYSkalearhsal  |
| IP100871535 | 2426 | 2423 | PKC->                                    |                                           |                                | 6709   | SPTAN1   | eiesafraIsSegkpyvtkee  |
| IP100871535 | 2431 | 2428 |                                          | unsp->                                    | Uniprot PhosphoSite            | 6709   | SPTAN1   | fralssegkpyYteelyqnl   |
| IP100871535 | 2431 | 2430 |                                          | unsp+CKII->ATM+unsp+CKII                  |                                | 6709   | SPTAN1   | alssegkpyvTkeelyqnlr   |
| IP100871535 | 2431 | 2435 | unsp+EGFR->unsp                          |                                           | PhosphoSite                    | 6709   | SPTAN1   | gkpyvteelYqnlrtreqady  |
| IP100871535 | 2431 | 2439 | ->cdc2                                   |                                           |                                | 6709   | SPTAN1   | vkeelyqnlTreqadyvsh    |
| IP100871539 | 405  | 403  | PKC->                                    | PKC->                                     |                                | 7226   | TRPM2    | ttfresvewTklkqidvrr    |
| IP100871539 | 1104 | 1101 | PKC+GSK3+cdk5+p38MAPK->GSK3+cdk5+p38MAPK | PKC+GSK3+cdk5+p38MAPK->GSK3+cdk5+p38MAPK  |                                | 7226   | TRPM2    | ttfresvewTklkqidvrr    |
| IP100871851 | 225  | 223  | unsp+PKC+CKII->CKII                      | unsp+PKC+CKII->CKII                       |                                | 4735   | 2-Sep    | vpviakadtTlkererlkr    |
| IP100871870 | 56   | 58   |                                          | ->unsp                                    |                                | 10094  | ARPC3    | yfkanvfknYeikneadrtl   |
| IP100872359 | 235  | 238  | unsp+PKC->PKC                            | unsp+PKC->PKC                             |                                | 1639   | DCTN1    | qvrdleekleTlrlkraedka  |
| IP100872762 | 54   | 46   | ->PKA                                    |                                           |                                | 8802   | SUCLG1   | ngirhcsytaSrhlyvdknt   |
| IP100872762 | 54   | 56   |                                          | PKC->                                     |                                | 8802   | SUCLG1   | srghlyvdknTkiicqgtgk   |
| IP100872780 | 213  | 216  | ATM+unsp+DNAPK->ATM+unsp+cdc2+DNAPK      | ATM+unsp+DNAPK->ATM+unsp+cdc2+DNAPK       |                                | 307    | ANXA4    | lhvfyekrnSqkdieqisks   |
| IP100872780 | 225  | 216  | ATM+unsp+DNAPK->ATM+unsp+cdc2+DNAPK      |                                           |                                | 307    | ANXA4    | lhvfyekrnSqkdieqisks   |
| IP100872780 | 225  | 223  | unsp+PKC->                               | unsp+PKC->                                |                                | 307    | ANXA4    | krnsqgdlreqSkvntsfgrt  |
| IP100872780 | 225  | 228  | PKC->cdc2                                | PKC->PKC+cdc2                             |                                | 307    | ANXA4    | kdieqisksTegsfedalla   |
| IP100872780 | 225  | 231  | unsp->unsp+cdc2                          | unsp->unsp+cdc2                           |                                | 307    | ANXA4    | eqsksetsqSfedallaivk   |
| IP100872780 | 293  | 296  | unsp->                                   | unsp->                                    |                                | 307    | ANXA4    | hfkrlygkslySfyikgdtsgd |
| IP100872780 | 293  | 297  | unsp+PKC+cdc2->CKI+cdc2                  | unsp+PKC+cdc2->unsp+CKI+cdc2              |                                | 307    | ANXA4    | hfkrlygkslySfyikgdtsgd |
| IP100872780 | 300  | 294  | ->PKA                                    | ->PKA                                     |                                | 307    | ANXA4    | rahfrlygkSlyfyikgdtsg  |
| IP100872780 | 300  | 296  | unsp->                                   | unsp->                                    |                                | 307    | ANXA4    | hfkrlygkslySfyikgdtsgd |
| IP100872780 | 300  | 297  | unsp+PKC+cdc2->cdc2                      | unsp+PKC+cdc2->unsp+CKI+cdc2              |                                | 307    | ANXA4    | hfkrlygkslySfyikgdtsgd |
| IP100872780 | 300  | 303  | unsp->                                   |                                           |                                | 307    | ANXA4    | hfkrlygkslySfyikgdtsgd |
| IP100872780 | 300  | 304  | unsp+CKII->CKII                          | unsp+CKII->unsp+cdc2+CKII                 |                                | 307    | ANXA4    | sfykigdtSgdyrvklvl     |
| IP100872780 | 300  | 307  |                                          | INSR->                                    |                                | 307    | ANXA4    | sfykigdtSgdyrvklvl     |
| IP100872874 | 51   | 52   | unsp->                                   | unsp->                                    |                                | 6303   | SAT1     | ilrilakelyYmeeqvilt    |
| IP100872874 | 51   | 54   | unsp+EGFR->                              | unsp+EGFR->                               |                                | 6303   | SAT1     | rilakelyYmeeqviltke    |
| IP100873029 | 681  | 674  | unsp+PKA->unsp+cdc2+PKA                  |                                           |                                | 4299   | AF11     | pspskekhhkSlspapskals  |
| IP100873029 | 681  | 675  | unsp+PKC+PKA->unsp+PKC+cdc2+PKA          | unsp+PKC+PKA->unsp+PKC+cdc2+PKA           |                                | 4299   | AF11     | pspskekhhkSlspapskals  |
| IP100873029 | 681  | 680  |                                          | ->DNAPK                                   |                                | 4299   | AF11     | kkhkslpapSkalsgepepak  |
| IP100873029 | 681  | 684  | unsp->unsp+CKII                          | unsp->unsp+CKII                           |                                | 4299   | AF11     | sslpapskalSgpeakdnve   |
| IP100873029 | 809  | 804  | unsp+PKC->unsp+PKA                       | unsp+PKC->unsp+PKC+DNAPK                  |                                | 4299   | AF11     | gkhhseksSdsssklakk     |
| IP100873029 | 809  | 808  |                                          | ->ATM+DNAPK                               |                                | 4299   | AF11     | sslpapskalSgpeakdnve   |
| IP100873518 | 61   | 60   | ->cdc2+PKA+DNAPK                         |                                           |                                | 8379   | MAD1L1   | qleraeqiSkshliavere    |
| IP100873518 | 61   | 62   | unsp+PKA+RSK->PKA+RSK                    | unsp+PKA+RSK->PKA+RSK                     |                                | 8379   | MAD1L1   | qleraeqiSkshliavere    |
| IP          |      |      |                                          |                                           |                                |        |          |                        |

Table S3

|             |      |      |                                                   |                                           |                              |             |          |                       |                        |
|-------------|------|------|---------------------------------------------------|-------------------------------------------|------------------------------|-------------|----------|-----------------------|------------------------|
| IP100874020 | 125  | 129  | PKC->                                             |                                           |                              |             | 84105    | PCBD2                 | lakfiekaaSv-----       |
| IP100876931 | 47   | 39   | unsp+PKC->unsp+PKC+cdc2                           |                                           |                              |             | 26173    | INTS1                 | algskqaneSktastllkpa   |
| IP100876931 | 47   | 43   | PKC->PKA                                          | PKC->PKA                                  |                              |             | 26173    | INTS1                 | kgqanesktaStllkpapsl   |
| IP100876931 | 47   | 44   | PKC+cdc2->cdc2                                    | PKC+cdc2->cdc2                            |                              |             | 26173    | INTS1                 | gqanesktaStllkpapsl    |
| IP100878183 | 452  | 451  |                                                   | unsp+PKC->unsp+PKC+DNAPK                  |                              |             | 388567   | ZNF749                | gkhehtdafSKrsdlqhkr    |
| IP100878183 | 452  | 454  | PKG->                                             | PKG->                                     |                              |             | 388567   | ZNF749                | khhtdafskrSdlqhkrld    |
| IP100878910 | 32   | 24   | unsp->unsp+cdc2                                   |                                           |                              |             | 23338    | PHF15                 | nsdtdshatStsaarscrlp   |
| IP100878910 | 32   | 28   | unsp+PKC->unsp                                    | unsp+PKC->unsp                            |                              |             | 23338    | PHF15                 | tdshatstaSsrcspisstk   |
| IP100878910 | 32   | 31   | unsp->unsp+PKA                                    | unsp->ATM+unsp+DNAPK                      |                              |             | 23338    | PHF15                 | hatstaSsrcspisstksgw   |
| IP100878910 | 32   | 36   | unsp+PKC->unsp+cdc2                               | unsp+PKC->unsp+PKC+cdc2                   |                              |             | 23338    | PHF15                 | sasrcslpStksgwprqrne   |
| IP100878910 | 38   | 35   | PKC->                                             |                                           |                              |             | 23338    | PHF15                 | tsasrcslpStksgwprqrn   |
| IP100878910 | 38   | 36   | unsp+PKC->cdc2                                    | unsp+PKC->unsp                            |                              |             | 23338    | PHF15                 | sasrcslpStksgwprqrne   |
| IP100878910 | 38   | 37   |                                                   | ->DNAPK                                   |                              |             | 23338    | PHF15                 | asrcslpStksgwprqrnek   |
| IP100878910 | 298  | 297  |                                                   | ->ATM                                     |                              |             | 23338    | PHF15                 | igcpekmepiTkishipasrw  |
| IP100878910 | 298  | 305  | PKC->PKC+PKA                                      |                                           |                              |             | 23338    | PHF15                 | ptkishipasaSrwalcsclsc |
| IP100878910 | 150  | 149  | unsp+PKG->unsp+PKG+PKA                            | unsp+PKG->unsp+PKG+DNAPK                  |                              |             | 85403    | EAF1                  | ppppmpfrapTKppvgpkspt  |
| IP100879588 | 891  | 887  |                                                   | ->EGFR                                    |                              | PhosphoSite | 63967    | CLSPN                 | flnmvrpmpqTqalqprlpia  |
| IP100879588 | 925  | 920  | PKC->                                             | PKC->                                     |                              |             | 63967    | CLSPN                 | elldicgTsqaeqhlprk     |
| IP100879588 | 925  | 921  | ATM+unsp+DNAPK->ATM+unsp+PKA+DNAPK                |                                           |                              |             | 63967    | CLSPN                 | lldctqgTsqaeqhlprks    |
| IP100879588 | 925  | 931  | unsp->unsp+PKA                                    |                                           |                              |             | 63967    | CLSPN                 | sqaekhlprkSDkkenmeell  |
| IP100879819 | 27   | 22   | unsp+PKC+PKA->unsp+PKA                            | unsp+PKC+PKA->unsp+PKA                    |                              |             | 84823    | LMNB2                 | patplsrtlrSrlekeeleere |
| IP100879819 | 61   | 59   | unsp+CKII->cdc2+CKII                              | unsp+CKII->CKII                           |                              |             | 84823    | LMNB2                 | lendrllrlllSekeevtre   |
| IP100879819 | 500  | 498  |                                                   | ->p38MAPK                                 |                              | Uniprot     | 84823    | LMNB2                 | legeeiyakTpkylraqgm    |
| IP100880048 | 252  | 248  | unsp+PKC->unsp+PKA                                | unsp+PKC->                                |                              |             | 129563   | DIS3L2                | ileekhsraaTgfklladkn   |
| IP100880048 | 252  | 259  | ->cdc2                                            |                                           |                              |             | 129563   | DIS3L2                | gikladiKnSelfryalfs    |
| IP100883857 | 352  | 351  |                                                   | ->ATM                                     |                              |             | 3192     | HNRNP                 | tekuprnhlyTKdindnevi   |
| IP100883857 | 609  | 613  | unsp+EGFR->unsp                                   |                                           |                              |             | 3192     | HNRNP                 | avvypckdrlfKqrkkaav    |
| IP100883857 | 814  | 817  | ATM+unsp+DNAPK->ATM+DNAPK                         | ATM+unsp+DNAPK->ATM+DNAPK                 |                              |             | 3192     | HNRNP                 | ggqfwgqgSwqhgyogy--    |
| IP100884867 | 243  | 247  | unsp+PKC->unsp                                    |                                           |                              |             | 7296     | TXNRD1                | srmvgkveeTVkhdwdrmie   |
| IP100885078 | 536  | 533  | PKC->                                             |                                           |                              |             | 201175   | SH3D20                | swtViegvgITfKdskslra   |
| IP100885078 | 536  | 538  | unsp+PKG+PKA->unsp                                | unsp+PKG+PKA->unsp                        |                              |             | 201175   | SH3D20                | egvltfKdsKtsaaagllsq   |
| IP100885078 | 536  | 540  | PKC->                                             |                                           |                              |             | 201175   | SH3D20                | gvltfKdsKtsaaagllrps   |
| IP100885078 | 536  | 541  | unsp->                                            | unsp->                                    |                              |             | 201175   | SH3D20                | vtfKdsKtsaaagllrpsk    |
| IP100885104 | 163  | 164  | unsp->unsp+CKI+p38MAPK                            |                                           | Uniprot PHOsphoELM PhosphoSi | 54737       | MPHOSPH8 | kkikrgreekSpdldkkak   |                        |
| IP100885104 | 177  | 182  | unsp+PKA->unsp                                    |                                           |                              | 54737       | MPHOSPH8 | kakagikldkSkdplessles |                        |
| IP100888429 | 527  | 518  | unsp+PKC->unsp+PKC+cdc2                           |                                           |                              | 283008      | FAM22E   | chrsraaprtTaridesssf  |                        |
| IP100888429 | 527  | 523  | unsp+PKG+cdc2+PKA->unsp+PKA+RSK                   | unsp+PKG+cdc2+PKA->unsp+PKG+cdc2+PKA+RSK  |                              |             | 283008   | FAM22E                | apsrgatrdSSsskfaagqg   |
| IP100888429 | 527  | 525  | unsp+PKC->                                        | unsp+PKC->                                |                              |             | 283008   | FAM22E                | srqtardssSkfaagqga     |
| IP100888429 | 527  | 526  | PKC->CKI+PKC                                      | PKC->ATM+DNAPK                            |                              |             | 283008   | FAM22E                | rgtaridssSkfaagqaar    |
| IP100890837 | 1349 | 1350 | unsp+unsp+CKII                                    | unsp->CKII                                |                              |             | 23347    | SMCHD1                | tlqvkaaynSlieegpiikm   |
| IP100893197 | 112  | 115  | PKC->                                             |                                           |                              |             | 5524     | PPP2R4                | lnevgvgkllTfeyrvsaiea  |
| IP100895801 | 305  | 304  |                                                   | ->DNAPK                                   |                              |             | 34       | ACADM                 | glaqraldeaTyalerktfg   |
| IP100895801 | 305  | 306  | unsp->                                            | unsp->                                    |                              |             | 34       | ACADM                 | aqraldeatYalerktfgkl   |
| IP100902533 | 317  | 314  | PKC->                                             | PKC->                                     |                              | Uniprot     | 9883     | POM121                | pdpcaketiSAlakeekrrt   |
| IP100902533 | 319  | 314  | PKC->                                             | PKC->                                     |                              | Uniprot     | 9883     | POM121                | pdpcaketiSAlakeekrrt   |
| IP100902560 | 54   | 59   | PKC->                                             | PKC->                                     |                              |             | 7417     | VDAC2                 | gtgvlkldkTKscsgvfst    |
| IP100902560 | 54   | 61   | unsp+unsp+cdc2                                    |                                           |                              |             | 7417     | VDAC2                 | glvldvdkTKscsgvfstsg   |
| IP100902560 | 87   | 86   |                                                   | CKI+PKC->CKI+PKC+DNAPK                    |                              |             | 7417     | VDAC2                 | dtgvtgtletTykwcweygit  |
| IP100902560 | 87   | 88   | unsp->SRC                                         |                                           |                              |             | 7417     | VDAC2                 | gkvtgtletTykwcweygitf  |
| IP100902560 | 89   | 83   | CKI+DNAPK->DNAPK                                  | CKI+DNAPK->DNAPK                          |                              |             | 7417     | VDAC2                 | sntdgtkvgtTletkykwcwey |
| IP100902560 | 89   | 86   | CKI+PKC->CKI                                      |                                           |                              |             | 7417     | VDAC2                 | dtgvtgtletTykwcweygit  |
| IP100902560 | 135  | 130  | unsp+CKI+p38MAPK->CKI+p38MAPK                     | unsp+CKI+p38MAPK->CKI+p38MAPK             | iprot PHOsphoELM PhosphoSi   | 7417        | VDAC2    | ktikfTdtTSpntqkkgsgki |                        |
| IP100902560 | 135  | 133  | unsp+CKI+PKC->CKI+PKC                             | unsp+CKI+PKC->CKI+PKC                     |                              | 7417        | VDAC2    | ltfTdtTSpntqkkgsgkiss |                        |
| IP100902560 | 135  | 137  | unsp+PKC->PKC                                     |                                           |                              | 7417        | VDAC2    | ttfTdtTSpntqkkgsgkiss |                        |
| IP100902560 | 135  | 142  | PKC->PKC+cdc2                                     |                                           |                              | 7417        | VDAC2    | ntqkkgsgkiSeykreinql  |                        |
| IP100908586 | 241  | 237  | unsp->unsp+PKA                                    | unsp->unsp+PKA                            |                              |             | 22902    | RUFY3                 | lralmqkklSeymkalinnk   |
| IP100908586 | 241  | 239  | INSR->                                            | INSR->                                    |                              |             | 22902    | RUFY3                 | lalmqkklSeymkalinnk    |
| IP100909140 | 58   | 51   | INSR->                                            |                                           | PhosphoSite                  | 203068      | TUBB     | dlqdrisvYneatgkyvp    |                        |
| IP100909140 | 58   | 59   | unsp->                                            | unsp->                                    |                              |             | 203068   | TUBB                  | vrynneatgkyVpralvdlv   |
| IP100909140 | 103  | 106  |                                                   |                                           | PhosphoSite                  | 203068      | TUBB     | gagnnwakghYtegaeldvsv |                        |
| IP100909140 | 103  | 107  | ->CKII                                            |                                           |                              | 203068      | TUBB     | agnnwakghYtegaeldvsv  |                        |
| IP100909140 | 379  | 382  | unsp+PKA->PKA                                     | unsp+PKA->PKA                             |                              | PhosphoSite | 203068   | TUBB                  | taiqelkrYSeqtamfrnk    |
| IP100910610 | 7    | 3    | PKC->                                             |                                           |                              |             | 14009    | UBE2F                 | -----nTlaskikrdg       |
| IP100914566 | 123  | 117  | INSR->                                            | INSR->                                    |                              |             | 2224     | FDP5                  | aiarkveleYnaigkynrg    |
| IP100914566 | 353  | 349  | unsp->                                            |                                           |                              |             | 2224     | FDP5                  | qclratpeqYqikenygqk    |
| IP100914930 | 720  | 718  |                                                   | unsp+PKC->unsp                            |                              |             | 29123    | ANKRD11               | ekwefkdelSikrindtnkd   |
| IP100914930 | 720  | 725  |                                                   | unsp+PKC->unsp+PKC+cdc2                   |                              |             | 29123    | ANKRD11               | dekslikrdTKndisrsfre   |
| IP100915324 | 118  | 123  | unsp->unsp+CKI                                    |                                           |                              |             | 7168     | TPM1                  | leaeakaadeSergmkviesr  |
| IP100915334 | 1168 | 1161 | unsp+cdk5->unsp+cdk5+p38MAPK                      |                                           |                              |             | 130507   | UBR3                  | rieieicrkvTPpvpkvkita  |
| IP100915334 | 1168 | 1170 |                                                   | PKC+PKG->PKG                              |                              |             | 130507   | UBR3                  | vtpvpkvkvTaektktdke    |
| IP100915334 | 1174 | 1170 | PKC+PKG->PKG                                      | PKC+PKG->PKG                              |                              |             | 130507   | UBR3                  | vtpvpkvkvTaektktdke    |
| IP100915334 | 1174 | 1176 | CKII->unsp+CKII                                   | CKII->unsp+CKII                           |                              |             | 130507   | UBR3                  | pkkvtaeekTKleerqrka    |
| IP100915400 | 263  | 262  |                                                   | CKI->ATM+CKI+DNAPK                        |                              |             | 9991     | ROD1                  | nacctridfSKtslnvknyn   |
| IP100915400 | 263  | 265  | PKC->                                             | PKC->                                     |                              |             | 9991     | ROD1                  | ctridfSKtslnvknynndk   |
| IP100915400 | 270  | 265  | PKC->                                             | PKC->                                     |                              |             | 9991     | ROD1                  | ctridfSKtslnvknynndk   |
| IP100915400 | 270  | 266  | PKC+cdc2->                                        | PKC+cdc2->cdc2                            |                              |             | 9991     | ROD1                  | ctridfSKtslnvknynndk   |
| IP100915400 | 429  | 434  | PKC+cdc2+PKA->PKC+cdc2                            | PKC+cdc2+PKA->PKC+cdc2                    |                              |             | 9991     | ROD1                  | qrlgyklvratlTsqhvaqvl  |
| IP100915400 | 429  | 436  | PKC->PKC+cdc2                                     | PKC+cdc2+PKA->PKC+cdc2                    |                              |             | 9991     | ROD1                  | lyskvratlSghaavqlpre   |
| IP100915400 | 555  | 552  | unsp+PKC+PKA->PKC+PKA                             |                                           |                              |             | 9991     | ROD1                  | digenhnlrvSfskstl----  |
| IP100915400 | 555  | 554  |                                                   | ->ATM+DNAPK                               |                              |             | 9991     | ROD1                  | genhnlrvSfskstl----    |
| IP100915400 | 555  | 556  | ->PKC                                             |                                           |                              |             | 9991     | ROD1                  | nhlrvSfskstl-----      |
| IP100916111 | 136  | 129  | ATM->                                             | ATM->                                     |                              | PhosphoSite | 4190     | MDH1                  | llkanvfkfSGgaaldkyak   |
| IP100916111 | 136  | 137  | unsp->                                            |                                           |                              |             | 4190     | MDH1                  | fksqgaaldKyakskvkvivv  |
| IP100916111 | 316  | 314  | PKC->                                             | PKC->                                     |                              |             | 4190     | MDH1                  | ysfpvknknTwkfvgeplpn   |
| IP100916144 | 267  | 271  | PKC->                                             |                                           |                              |             | 8497     | PPFIA4                | hgakrgkigKSigrffgkcke  |
| IP100916144 | 267  | 272  | unsp+PKA->PKA                                     | unsp+PKA->PKA                             |                              |             | 8497     | PPFIA4                | kgakrgkigKSigrffgkcke  |
| IP100916144 | 270  | 272  | unsp+PKA->PKC                                     | unsp+PKA->unsp                            |                              |             | 8497     | PPFIA4                | kgakrgkigKSigrffgkcke  |
| IP100916332 | 758  | 753  | unsp+cdc2->cdc2                                   | unsp+cdc2->cdc2                           |                              |             | 85808    | MLL3                  | ptbegcvkdVsyagggsklis  |
| IP100916332 | 758  | 758  | unsp+CKII->cdc2                                   | unsp+CKII->unsp+cdc2+CKII                 |                              |             | 85808    | MLL3                  | ptbegcvkdVsyagggsklis  |
| IP100916332 | 827  | 831  | unsp+cdc2+cdc2+CKII                               | unsp+PKC->unsp+PKC+cdc2                   |                              |             | 85808    | MLL3                  | pkspgmkpaeTKrfsppgrp   |
| IP100916332 | 1772 | 1770 | unsp+PKC->                                        | unsp+PKC->DNAPK                           |                              |             | 85808    | MLL3                  | ksqakgaekTaleqkvneq    |
| IP100916332 | 2009 | 2004 |                                                   | unsp+cdc2->cdc2                           |                              |             | 85808    | MLL3                  | tkagpiaagtSDhftkpsra   |
| IP100916332 | 2009 | 2008 | PKC->                                             | PKC->                                     |                              |             | 85808    | MLL3                  | piaagtSDhftkpspradvfq  |
| IP100916332 | 2009 | 2011 | unsp+p38MAPK->p38MAPK                             | unsp+p38MAPK->unsp                        |                              |             | 85808    | MLL3                  | agtsdhtfkSpradvfqarg   |
| IP100916332 | 2809 | 2807 | unsp+PKC->                                        | unsp+PKC->                                |                              |             | 85808    | MLL3                  | keqenktvlSDkshpqqkst   |
| IP100916332 | 2809 | 2811 | unsp+GSK3+cdk5->GSK3+cdk5                         |                                           |                              |             | 85808    | MLL3                  | nektvlSDkshpqqkstvne   |
| IP100916332 | 2814 | 2811 | unsp+GSK3+cdk5->GSK3                              | unsp+GSK3+cdk5->unsp+GSK3                 |                              |             | 85808    | MLL3                  | nektvlSDkshpqqkstvne   |
| IP100916332 | 2814 | 2816 | unsp->                                            |                                           |                              |             | 85808    | MLL3                  | lsdtkhspqkStvnekvtekv  |
| IP100916332 | 2832 | 2828 | unsp+GSK3+p38MAPK->unsp+GSK3+cdk5+p38MAPK         |                                           |                              |             | 85808    | MLL3                  | evktevlsnSpSkvesketei  |
| IP100916332 | 2832 | 2831 |                                                   | unsp->unsp+DNAPK                          |                              |             | 85808    | MLL3                  | evktevlsnSpSkvesketei  |
| IP100916332 | 3714 | 3708 | unsp+CKI->unsp                                    | unsp+CKI->unsp                            |                              |             | 85808    | MLL3                  | tyansevdktSMetlekaetk  |
| IP100916332 | 3714 | 3715 | CKI->CKI+CKII                                     | CKI->CKI+CKII                             |                              |             | 85808    | MLL3                  | cktsmetpakTeiilekaet   |
| IP100921422 | 48   | 43   | unsp+GSK3->unsp+GSK3+p38MAPK                      | unsp+GSK3->unsp+GSK3+p38MAPK              |                              |             | 9793     | CKAP5                 | kifqkdkdelSpewskfagi   |
| IP100921422 | 48   | 47   |                                                   | PKA->ATM+PKA+DNAPK                        |                              |             | 9793     | CKAP5                 | kikdekspevSKflglikkfv  |
| IP100921844 | 264  | 267  | unsp+DNAPK->DNAPK                                 | unsp+DNAPK->DNAPK                         |                              |             | 701      | BUB1B                 | irvggalkapSqnglqnqpf   |
| IP100924816 | 97   | 95   | unsp+PKC->cdc2                                    | unsp+PKC->                                |                              |             | 126319   | MTFN                  | klliskgaadTKvgpdgdtft  |
| IP100925046 | 309  | 302  |                                                   | unsp+CKII->CKII                           |                              |             | 5859     | QARS                  | ngicifirfnpnpeakeaaf   |
| IP100925255 | 28   | 32   | unsp+PKC+cdc2->unsp+cdc2                          | unsp+PKC+cdc2->unsp+cdc2                  |                              |             | 222194   | RSBN1L                | ekepfGklgISrddpgslisa  |
| IP100926625 | 265  | 259  | unsp+GSK3+cdk5+cdc2->unsp+cdk5+cdc2               |                                           |                              |             | 7791     | ZYX                   | ntnrgpprasSpapktfsvp   |
| IP100926625 | 265  | 267  | unsp+GSK3+cdk5->GSK3+cdk5+p38MAPK                 |                                           | Uniprot PHOsphoELM PhosphoSi | 7791        | ZYX      | asspapapktfSpapktfsvp |                        |
| IP100926625 | 272  | 267  | unsp+GSK3+cdk5->cdk5+p38MAPK                      | unsp+GSK3+cdk5->cdk5+p38MAPK              | iprot PHOsphoELM PhosphoSi   | 7791        | ZYX      | asspapapktfSpvtktfsvp |                        |
| IP100926625 | 272  | 270  | unsp+cdk5+p38MAPK->cdk5+p38MAPK                   | unsp+cdk5+p38MAPK->cdk5+p38MAPK           | Uniprot PhosphoSite          | 7791        | ZYX      | papapktfSpvtktfsvp    |                        |
| IP100926625 | 272  | 274  | unsp+cdk5+p38MAPK->GSK3+cdk5+p38MAPK              | unsp+cdk5+p38MAPK->unsp+GSK3+cdk5+p38MAPK | Uniprot PhosphoSite          | 7791        | ZYX      | pktsfpvtktfSpvskfsgpa |                        |
| IP100926625 | 279  | 278  |                                                   | ->ATM+DNAPK                               |                              | PhosphoSite | 7791     | ZYX                   | pvtpktfsvaSkfsgpaggps  |
| IP100926625 | 279  | 281  | unsp+CKI+GSK3+cdk5+p38MAPK->CKI+GSK3+cdk5+p38MAPK |                                           | Uniprot PHOsphoELM PhosphoSi | 7791        | ZYX      | pkptfsvaSkfsgpaggpsq  |                        |
| IP100926625 | 279  | 288  | ->cdc2                                            |                                           | Uniprot PhosphoSite          | 7791        | ZYX      | skfsgpaggpsSpvskfsgp  |                        |
| IP100929648 | 86   | 82   | unsp->unsp+PKA+RSK                                | ->cdc2                                    |                              |             | 2029     | ENSA                  | llgkvefsvkSvqegkfsgd   |
| IP100929648 | 86   | 90   |                                                   | CKII+PKA->                                | iprot PHOsphoELM PhosphoSi   | 2029        | ENSA     | mksvqegkfYdSgdynmakam |                        |
| IP100930609 | 51   | 47   | unsp+PKC+PKA->unsp+PKA                            | unsp+PKC+PKA->unsp+PKA                    |                              |             | 29968    | PSAT1                 | isvlsmhrsdFakiinnete   |
| IP100930609 | 333  | 331  | unsp->                                            | unsp->                                    |                              |             | 29968    | PSAT1                 | ldkalelnmSlkghrsvggi   |
| IP100930609 | 333  | 337  |                                                   | ->cdc2                                    |                              |             | 29968    | PSAT1                 | lnmlslghrSvsgiraslry</ |

Table S3

|             |      |      |                                           |        |           |                        |
|-------------|------|------|-------------------------------------------|--------|-----------|------------------------|
| IPI00936931 | 267  | 263  | unsp->SRC+unsp                            | 10613  | ERLIN1    | rekakadaeyYaahkyatsnk  |
| IPI00936931 | 267  | 268  | unsp->                                    | 10613  | ERLIN1    | adaeyYaahkyatsnkhklt   |
| IPI00937545 | 1136 | 1139 | PKC->                                     | 23047  | PD558     | nvlgavnpklsSagkqsqtks  |
| IPI00937545 | 1136 | 1140 | PKC->                                     | 23047  | PD558     | vlgavnpklsSagkqsqtks   |
| IPI00939163 | 68   | 65   | PKC->                                     | 10808  | HSPH1     | qqithannvSvknrfhgrf    |
| IPI00939163 | 272  | 278  | unsp->unsp+PKA                            | 10808  | HSPH1     | qecckiklmsSnstldplni   |
| IPI00939163 | 272  | 279  | PKA->cdc2+PKA                             | 10808  | HSPH1     | ecckiklmsSnstldplni    |
| IPI00939163 | 272  | 281  | ->cdc2                                    | 10808  | HSPH1     | ekiklmsSnstldplni      |
| IPI00939163 | 430  | 429  | ->PKA                                     | 10808  | HSPH1     | vfrmaapfSkvltfrfrrg    |
| IPI00939238 | 51   | 45   | ->cdc2                                    | 861    | RUNX1     | stsrtrtpsTalsrgkmssea  |
| IPI00939238 | 51   | 53   | PKA->                                     | 861    | RUNX1     | ptstalspgkmSealplgapda |
| IPI00939238 | 70   | 73   | unsp+PKC->PKC                             | 861    | RUNX1     | agaalagklrSgdrsmvevia  |
| IPI00939265 | 262  | 259  | unsp+PKC->PKC                             | 55303  | GIMAP4    | erekanireeYeeikrktedk  |
| IPI00939320 | 173  | 168  | unsp+PKC->unsp+PKC+PKA                    | 23049  | SMG1      | reddrdrTaVakkefiegq    |
| IPI00939493 | 189  | 183  | unsp+EGFR->EGFR                           | 25902  | MTHFD1L   | lkpekdvvgvTdnlgkvrg    |
| IPI00939879 | 144  | 149  | PKG+PKA->                                 | 164    | AP1G1     | ageveklktSnsyfrkkaal   |
| IPI00940148 | 54   | 61   | unsp+GSK3+cdk5+p38MAPK->unsp+GSK3+p38MAPK | 2665   | GD12      | diylkrfkpgSpesmgrqrd   |
| IPI00940148 | 112  | 108  | CKI+PKC->CKI+PKA                          | 2665   | GD12      | ryldfkvtvgSfyvkggkiyk  |
| IPI00940237 | 35   | 37   | PKC+PKA->PKC                              | 10212  | DDX39     | pappkkdikgSyvshssgfr   |
| IPI00940237 | 35   | 38   | INSR+unsp->                               | 10212  | DDX39     | appkkdikgsYvshssgfrd   |
| IPI00940237 | 35   | 40   | unsp+PKC->                                | 10212  | DDX39     | pkkdiksgsvSihssgfrd    |
| IPI00940237 | 187  | 183  | PKA->PKA+RSK                              | 10212  | DDX39     | gnialvmrSfslknvkhfv    |
| IPI00940237 | 187  | 185  | unsp+PKC+PKB+PKA+RSK->unsp+PKA+RSK        | 10212  | DDX39     | ilalvmrSfslknvkhfv     |
| IPI00940237 | 333  | 329  | ->EGFR                                    | 10212  | DDX39     | gmaqeersrYqgdfqfrrr    |
| IPI00940535 | 61   | 60   | ->cdc2+PKA+DNAPK                          | 8379   | MAD11L    | gleaeqirSkshliqvere    |
| IPI00940535 | 61   | 62   | unsp+PKA+RSK->PKA+RSK                     | 8379   | MAD11L    | eeraeqirSkshliqvere    |
| IPI00940842 | 101  | 100  | unsp+PKC+CKII->unsp+PKC                   | 728026 | LOC728026 | aedddeeddVtkkqtktdkdd  |
| IPI00940842 | 101  | 105  | unsp+PKC+CKII->unsp+CKII                  | 728026 | LOC728026 | dddvdtkkqTKdkdd-----   |
| IPI00941161 | 815  | 813  | unsp+PKC->CKII                            | 8615   | USO1      | sqsevitklqTekqellakte  |
| IPI00941255 | 238  | 233  | CKI->CKI+p38MAPK                          | 8665   | E1F3F     | vpgtrmgvmtPltvtkyayyd  |
| IPI00941255 | 238  | 236  | unsp+PKC->PKC                             | 8665   | E1F3F     | rtmgvmtPltvtkyayydter  |
| IPI00941331 | 196  | 190  | unsp+CKI+CKII->unsp+PKA+CKII              | 23157  | 6-Sep     | ipiaakadaSksektfkuk    |
| IPI00941501 | 394  | 390  | PKC->                                     | 4603   | MYBL1     | lsdaaspiSktpvklmriqh   |
| IPI00941501 | 394  | 391  | unsp+cdk5+p38MAPK->unsp+p38MAPK           | 4603   | MYBL1     | sdaaspiSktpvklmriqh    |
| IPI00941928 | 496  | 499  | unsp+cdc2+DNAPK->cdc2+DNAPK               | 64210  | MMS19     | lyrslfkedSqscrvaaalea  |
| IPI00941928 | 496  | 501  | unsp->                                    | 64210  | MMS19     | rlsflkedsqScrvaaaleag  |
| IPI00942092 | 147  | 151  | unsp+PKA+DNAPK->PKA+DNAPK                 | 158    | ADSL      | rladfakeraSlptlgtthfq  |
| IPI00942246 | 516  | 514  | unsp+PKC->unsp+PKA                        | 271    | AMPD2     | elifktdnrvSgkyfahiike  |
| IPI00942458 | 510  | 506  | unsp+PKC->unsp                            | 64062  | RBM26     | sgepgvptkkTwfdrkpnfrnt |
| IPI00942495 | 236  | 234  | unsp+PKC->CaM-II                          | 10001  | MED6      | ettknvqqkVsakgppckmr   |
| IPI00942668 | 44   | 43   | unsp+PKC->                                | 79156  | PLEKH1    | grvillegvTkeckkakar    |
| IPI00942760 | 340  | 339  | PKC+cdc2->PKC+PKA+cdc2                    | 23107  | MRPS27    | qylerrkallSkqlgalkies  |
| IPI00942976 | 43   | 51   | ->cdc2                                    | 2053   | EPHX2     | fkggpegatTrlmkgteils   |
| IPI00942979 | 6    | 3    | PKC->                                     | 7086   | TKT       | -----meSyhkpqqkqlq     |
| IPI00942979 | 232  | 236  | PKG->                                     | 7086   | TKT       | kafgqakhpTaiaktfkgr    |
| IPI00942979 | 241  | 249  | unsp+PKA->unsp                            | 7086   | TKT       | iaktfkgrTgvedkeswhg    |
| IPI00942979 | 352  | 348  | unsp+CKI+PKC->unsp+CKI                    | 7086   | TKT       | ldgdtkstnSeifkkehpd    |
| IPI00942979 | 456  | 454  | unsp+PKC+CKII->CKII                       | 7086   | TKT       | tvfypsdgvaTekavalaant  |
| IPI00942979 | 597  | 595  | unsp+PKC->                                | 7086   | TKT       | thlavnrnpSgkpaellmrf   |
| IPI00943074 | 459  | 461  | unsp+PKC->PKC                             | 5589   | PRKCSH    | swipgphdktSamkyegatgc  |
| IPI00943093 | 305  | 301  | unsp+PKC+CKII->unsp+CKII                  | 23526  | HMHA1     | nmakymkdlSylekrtliem   |
| IPI00943093 | 305  | 307  | PKG+CKII->CKII                            | 23526  | HMHA1     | kdlisylekrTiemefakgl   |
| IPI00945964 | 175  | 171  | PKC->                                     | 85476  | GFM1      | qmkyrnpvffTfinkldrmgs  |
| IPI00945964 | 175  | 181  | RSK->PKA+RSK                              | 85476  | GFM1      | tfinkldrmgSnparalqgmr  |
| IPI00946154 | 168  | 166  | unsp->                                    | 2247   | FGF2      | pghfkdpkrlyCknngfflri  |
| IPI00946154 | 261  | 257  | ->EGFR                                    | 2247   | FGF2      | tyrsrkytswYvalkrtgqyk  |
| IPI00946154 | 267  | 263  | ->PKG                                     | 2247   | FGF2      | ytswyvalkrTgqykgksgt   |
| IPI00946154 | 267  | 270  | PKC->PKC+cdc2                             | 2247   | FGF2      | lkrtgqykgSkttgpggakail |
| IPI00946154 | 267  | 272  | ->cdc2                                    | 2247   | FGF2      | rtgqykgSkTgpggakailf   |
| IPI00946154 | 271  | 270  | PKC->PKC+PKA                              | 2247   | FGF2      | lkrtgqykgSkttgpggakail |
| IPI00946154 | 277  | 270  | PKC->PKC+cdc2                             | 2247   | FGF2      | lkrtgqykgSkttgpggakail |
| IPI00953461 | 724  | 727  | unsp+PKC+PKA->unsp+PKC                    | 23185  | LARP4B    | pspsamgkrSreqstppksp   |
| IPI00953625 | 353  | 352  | CKI->DNAPK                                | 339287 | MSL1      | tpvkklaepfSkvkttkpkhs  |
| IPI00953625 | 353  | 358  | unsp+PKC+p38MAPK->unsp+PKC+GSK3+p38MAPK   | 339287 | MSL1      | apefsivktkTpkhspkkeep  |
